# Supplementary material for: Quantitative analysis of transcriptome dynamics provides novel insights into developmental state transitions
Source: PubMed Central journal article supplement (PMC9588240; doi:10.1186/s12864-022-08953-3), 2022-10-23
Supplement: 12864_2022_8953_MOESM1_ESM.pdf [file 12864_2022_8953_MOESM1_ESM.pdf]

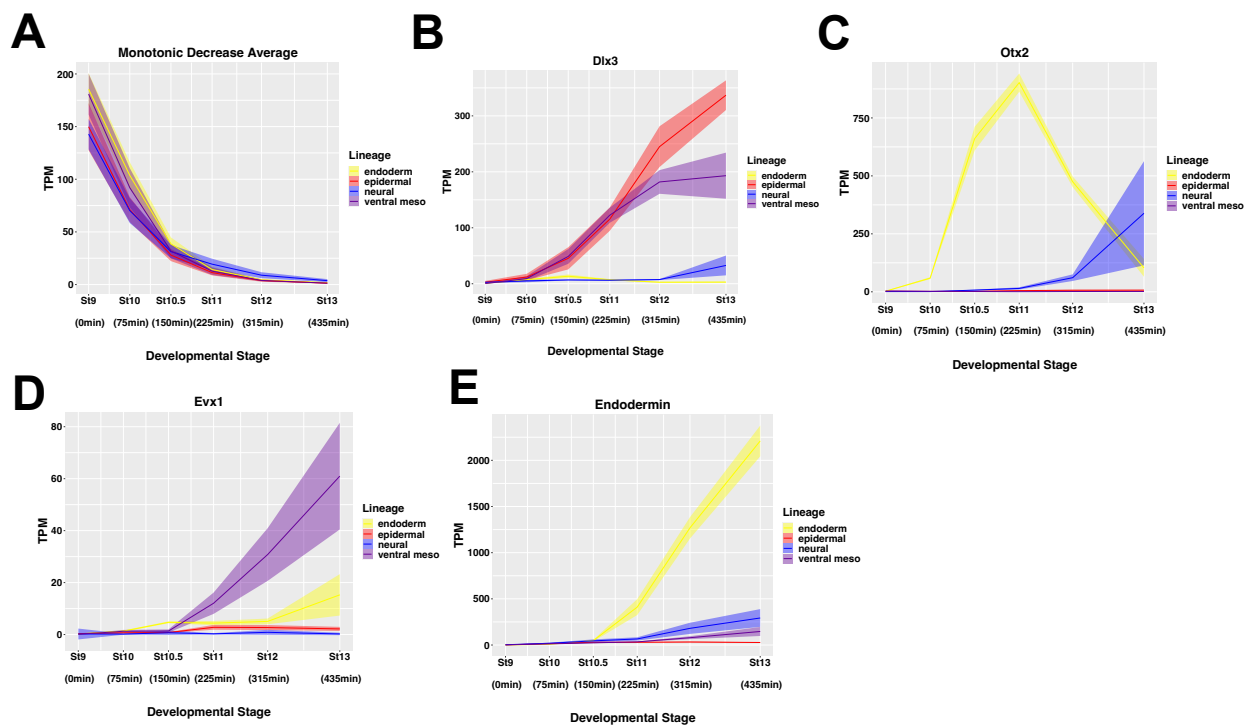

**Supplemental Figure 1. *Xenopus blastula* explants can be reprogrammed to adopt any lineage.** (A-E) RNA Seq TPM expression over time of (A) average of all monotonically decreasing genes with a >25fold decrease between stage 9 and 13 and maximum TPM of 20 at stage 13, (B) epidermal marker *Dlx3*, (C) neural marker *Otx2*, (D) mesoderm marker *Evx1* (E) endoderm marker *Endodermin*. Graphs are sums of S+L allele. Width of lines represents SEM of three biological replicates.
