# Supplementary material for: Quantitative analysis of transcriptome dynamics provides novel insights into developmental state transitions
Source: BMC Genomics. 2022 Oct 23;23:723. doi: 10.1186/s12864-022-08953-3 (PMC9588240; doi:10.1186/s12864-022-08953-3)
Supplement: Supplementary file 11 — Additional file 11. Supplemental Table 2. Gene Lists from all Overlapping Categories from UpSet Plots of all Transcription Factors expressed >10 TPM corresponding with Supplemental Figure 2. [file 12864_2022_8953_MOESM11_ESM.xlsx]

## Sheet: Stage10
Gene Lists from all Overlapping Categories from UpSet Plots of all Transcription Factors expressed >10 TPM corresponding with Supplemental Figure 2
All_Lineages	Epi-Meso-Neur	Epi-Meso-Endo	Epi-Neur-Endo	Meso-Neur-Endo	Epi-Neur	Epi-Meso	Epi-Endo	Neur-Meso	Neur-Endo	Meso-Endo	Epi	Neur	Endo	Meso
adnp.L	arid4b.L	42sp43.L	foxk2.S	atf5.2.S	epas1.S	prdm1.L	bcl11a.L	n/a	hnf4g.L	bach1.S	atf6.L	cebpb.S	atf6b.L	dlx5.L
adnp.S	elk1.L	arid5b.L	msantd3.S	fosl1.L	foxd4l1.1.S	ventx1.1.L	rere.S		klf10.S	bix1.1.L	cdx1.S	egr1.L	bix1.1.S	foxi1.L
adnp2.L	fosl2.L	dmtf1.S	znf142.L	hdx.S	foxd4l1.2.L	ventx1.2.L	rxrg.L		kmt2c.S	bix1.2.L	dlx3.S	egr1.S	cic.L	ikzf2.L
adnp2.S	foxd4l1.1.L	elmsan1.S		hes7.2.L	irx1.L	zbtb11.S	tox4.S		znf526.L	bix1.3.L	dlx6.S	jun.L	crem.L	ventx1.1.S
aebp2.S	hes1.S	foxj1.L		mier2.S	irx2.L	znf740.S	zbtb8b.L			bix1.3.S	dmrt2.L	jun.S	crx.L	ventx3.2.L
arid2.L	hes2.L	gpbp1.L		zbtb45.S	klf11.S					e2f1.L	foxp1.S	klf11.L	elf2.S
arid2.S	hes3.1.L	hic2.L		znf646.S	mypop.L					eomes.L		lhx3.S	elk4.L
arid3a.L	hes3.1.S	lin28a.L			smad4.1.L					eomes.S		lhx8.S	foxa4.L
arid3a.S	hes6.1.L	zfat.L			sox21.L					klf6.L			foxa4.S
arid3b.L	klf4.L	mxd1.L			sox9.S					mix1.L			foxj3.L
arid4a.L	maff.L	nfatc3.L			zfp91.S					mix1.S			foxj3.S
arntl.S	maff.S	smad6.S								patz1.L			foxo3.L
arntl2.L	meis3.S	znf516.L								prdm10.L			gata2.L
atf1.S	mxi1.L	znf518a.L								rel.S			gata2.S
atf4.L	nfe2l1.L									smad6.L			gata4.S
atf4.S	nr4a1									smad7.L			gpbp1l1.L
atf6.S	sox21.S									smad7.S			gsc.L
camta2.L	stat1.S									snai1.L			gsc.S
carhsp1.L	ventx1.2.S									snai1.S			hes7.1.S
carhsp1.S	zic3.L									sox17a.L			hhex.L
cdc5l.L										sox17b.1.S			hoxc12.L
cdc5l.S										zbtb26.S			hoxc13.S
cebpg.L										zbtb33.L			klf17.S
champ1.S										znf292.S			klf6.S
creb1.S										znf574.L			lhx1.L
crebrf.L										znf770.L			lhx1.S
crebrf.S													mafb.S
csde1.L													mespa.S
csde1.S													mespb.L
ctcf.L													mespb.S
ctcf.S													mixer.L
dbp.L													mixer.S
dlx5.S													nr2f1.L
dmtf1.L													osr1.L
dnajc1.L													osr1.S
dnajc1.S													osr2.L
dnajc2.S													osr2.S
dnajc21.L													otx1.L
e2f3.L													otx2.L
e2f3.S													pbx3.S
e2f4.L													pitx2.S
e2f4.S													plag1.S
e2f5.S													satb1.S
e2f6.S													sox17a.S
e2f7.L													sox8.L
e2f8.L													stat1.L
e4f1.L													zbtb18.S
e4f1.S													zbtb21.L
edf1.L													zbtb37.S
elf1.L													znf292.L
epas1.L													znf407.S
erf.L													znf410.L
erf.S													znf516.S
ets1.L													znf518a.S
ets1.S													znf521.S
ets2.L													znf592.S
ets2.S													zzz3.S
etv1.L
etv1.S
etv3.S
etv3l.S
etv6.L
etv6.S
figla.L
fos.L
fos.S
foxh1.2.L
foxh1.L
foxh1.S
foxi2.L
foxi2.S
foxj1.S
foxk2.L
foxm1.S
foxn2.L
foxn2.S
foxn3.L
foxn3.S
foxr1.L
gabpa.L
gabpa.S
gatad1.L
gatad2a.L
gmeb1.L
gmeb1.S
gpbp1l1.S
grhl1.L
grhl1.S
grhl3.L
grhl3.S
gtf2i.S
gtf2ird1.S
gtf3a.L
gzf1.S
hes1.L
hes4.L
hes7.1.L
hif1a.L
hinfp.S
hmbox1.L
hmbox1.S
hmg20a.L
hmg20b.L
hmg20b.S
hmgb1.L
hmgb2.S
hmgb3.L
hmgb3.S
hmgxb3.L
hmgxb4.S
homez.L
homez.S
hsf1.L
hsf2.2.L
hsf2.L
id2.L
id2.S
id3.L
id3.S
ikzf5.L
irf2.L
irf2.S
irf5.L
irf6.2.L
irf6.2.S
irf6.L
irf6.S
irf9.L
irx1.S
jarid2.L
jarid2.S
junb.L
junb.S
kdm5c.S
klf17.L
klf2.L
klf2.S
klf5.S
klf8.L
l3mbtl3.S
lcor.S
lhx5.L
lhx5.S
lin28a.S
lin28b.L
lin28b.S
max.L
maz.S
mef2d.L
mef2d.S
mga.L
mier1.L
mier1.S
mlx.L
mlxip.L
msantd3.L
msantd4.L
msantd4.S
msx1.L
mta1.L
mta2.L
mtf1.L
mxd3.L
mxd3.S
mybl2.S
myc.L
myc.S
mynn.L
mysm1.L
naif1.S
ncor1.S
nfatc3.S
nfx1.S
nfxl1.L
nfya.S
not.L
not.S
nr1i2.L
nr1i2.S
nr2c1.L
nr2c1.S
nr6a1.S
nrbf2.S
nrf1.L
nrf1.S
pbrm1.L
pbx1.L
pbx1.S
pbx2.L
pbx2.S
pknox2.L
pms1.S
pou2f1.S
pou5f3.1.L
pou5f3.1.S
pou5f3.2.L
pou5f3.2.S
pou5f3.3.L
pou5f3.3.S
ppara.L
ppara.S
prdm1.S
prdm15.S
prdm2.S
prdm4.L
prdm9.L
rad54b.L
rara.S
rarg.S
rcor1.L
rcor2.L
rela.L
rest.L
rfx2.L
rfx2.S
rfx5.S
rfx7.L
rlf.L
rlf.S
rxrb.L
rxrb.S
sall1.L
sall4.L
smad1.L
smad1.S
smad2.L
smad2.S
smad4.1.S
smad4.2.L
smad4.2.S
smad9.L
smarca5.S
smarcc1.L
smarcc1.S
smarcc2.L
smarce1.L
smarce1.S
sox11.L
sox11.S
sox13.S
sox15.L
sox17b.2.L
sox2.L
sox3.L
sox3.S
sp1.L
sp1.S
sp2.L
sp2.S
sp3.L
sp3.S
sp5l.L
sp5l.S
srebf1.S
srebf2.L
srf.L
srf.S
ssrp1.S
stat2.L
stat3.1.L
stat3.2.L
stox1.L
stox1.S
sub1.L
sub1.S
tada2a.L
tcf12.L
tcf12.S
tcf3.L
tcf3.S
tcf7.S
tcf7l1.L
tcf7l1.S
tef.S
terf1.L
terf2.L
tfam.L
tfam.S
tfap2a.L
tfap2a.S
tfap2c.S
tfcp2.L
tfdp1.L
tfdp1.S
tfdp2.S
tgif1.L
tgif2.L
tgif2.S
thap1.L
thap1.S
thap4.S
thap7.L
thap7.S
tox4.L
tp53.L
trhd.S
tulp3.L
ubtf.L
ubtf.S
usf2.L
usf2.S
usf3.S
vegt.L
vegt.S
ventx2.1.L
ventx2.1.S
ventx2.2.L
vezf1.L
vezf1.S
wdhd1.L
whsc1.L
whsc1.S
wiz.L
xbp1.L
xbp1.S
ybx1.S
ybx2.L
ybx2.S
yy1.L
yy1.S
zbed4.L
zbed4.S
zbtb10.L
zbtb12.L
zbtb17.L
zbtb17.S
zbtb2.L
zbtb2.S
zbtb24.L
zbtb3.L
zbtb33.S
zbtb34.L
zbtb34.S
zbtb44.L
zbtb47.L
zbtb47.S
zbtb48.L
zbtb48.S
zbtb49.L
zbtb5.S
zbtb6.S
zbtb8b.S
zfpm1.S
zfx.L
zfx.S
zhx1.L
zhx2.S
zhx3.L
zhx3.S
zic1.L
zic2.L
zic2.S
znf131.L
znf131.S
znf143.L
znf217.L
znf217.S
znf276.S
znf277.L
znf281.L
znf281.S
znf319.L
znf319.S
znf335.L
znf335.S
znf384.L
znf423.L
znf507.L
znf518b.L
znf518b.S
znf526.S
znf574.S
znf592.L
znf618.S
znf639.L
znf639.S
znf646.L
znf652.L
znf652.S
znf653.L
znf653.S
znf668.L
znf710.L
znf821.S
zzz3.L

## Sheet: Stage10.5
Gene Lists from all Overlapping Categories from UpSet Plots of all Transcription Factors expressed >10 TPM corresponding with Supplemental Figure 2
All_Lineages	Epi-Meso-Neur	Epi-Meso-Endo	Epi-Neur-Endo	Meso-Neur-Endo	Epi-Neur	Epi-Meso	Epi-Endo	Neur-Meso	Neur-Endo	Meso-Endo	Epi	Neur	Endo	Meso
adnp.L	edf1.S	42sp43.L	crebrf.S	adnp2.L	arnt.S	creb3l2.L	crx.S	foxh1.S	fosl1.L	bix1.1.L	dlx3.L	atf3.L	bix1.1.S	cdx2.L
adnp.S	hes6.1.L	erf.S	crx.L	gpbp1l1.S	elk1.L	dlx3.S	hic2.L	nr4a1	foxd4l1.1.L	bix1.2.L	gli3.L	cebpa.S	cebpa.L	creb3l4.S
adnp2.S	hes7.1.L	ets1.S	epas1.L	msantd4.L	epas1.S	dlx5.L	nr6a1.S	zbtb45.S	foxd4l1.1.S	bix1.3.L	thap7.S	cebpb.S	cux2.L	figla.L
aebp2.S	klf11.L	gata2.L	lhx3.S	prdm2.S	fosl2.S	dlx6.S	ppara.L		hnf4g.L	bix1.3.S		cebpd.L	egr1.L	maz.S
arid2.L	klf17.L	gata2.S	nfx1.S	srebf1.S	hes2.L	foxi1.L	rere.S		jun.S	eomes.L		cebpd.S	egr1.S	patz1.L
arid2.S	klf2.L	zfat.L	nrf1.S	zbtb33.S	irf8.S	foxi1.S	znf142.L		myc.S	eomes.S		foxd4l1.2.L	egr2.L	tox4.S
arid3a.L	klf2.S	prdm1.L	phox2a.S		irx1.L	hesx1.L			rest.L	ets1.L		foxo4.L	elk4.S	ventx3.2.L
arid3a.S	klf4.L	rreb1.S	usf3.S		irx2.L	msx1.L			rlf.L	hes7.2.L		hes1.S	etv3l.S	ventx3.2.S
arid3b.L	lin28b.L	smad2.L	zbtb3.L		klf11.S	msx1.S				hsf2.L		insm1.L	foxa1.S	znf292.S
arid4a.L	meis3.S	smad6.L	zic3.L		mxd3.L					mix1.L		insm1.S	foxa4.L
arntl.S	rarg.L	smad7.L			ncor1.S					mix1.S		jun.L	foxa4.S
arntl2.L	sox21.S	smad7.S			prdm14.S					mixer.L		jund.S	gata4.L
atf1.S	stat1.S	sox18.S			sox21.L					nr2c1.L		klf9.L	gata4.S
atf4.L	zbtb11.S	ventx1.1.L								snai1.L		myod1.L	gata6.L
atf4.S	znf710.L	ventx1.1.S								sox17a.L		nr1i2.S	gata6.S
atf6.S		ventx1.2.L								sox17a.S		olig4.S	gsc.L
carhsp1.L		ventx1.2.S								sox17b.1.S		zbtb21.L	gsc.S
carhsp1.S		ventx2.1.L								sox8.L			hdx.S
cdc5l.L		ventx2.2.L								t.S			hhex.L
cdc5l.S		zbtb8b.S											hoxc12.L
cdx1.S		zfx.L											hoxc13.S
cebpg.L		znf618.S											ikzf5.L
champ1.S													irx3.L
creb1.S													klf6.L
crebrf.L													klf6.S
csde1.L													lef1.L
csde1.S													lhx1.L
ctcf.L													lhx1.S
ctcf.S													zeb2.L
dbp.L													mafb.S
dlx5.S													mespa.S
dmtf1.L													mespb.L
dnajc1.L													mespb.S
dnajc1.S													mier2.S
dnajc2.S													mixer.S
dnajc21.L													msantd3.L
e2f3.L													nfatc3.S
e2f3.S													nr2f1.L
e2f4.L													onecut2.S
e2f4.S													osr1.L
e2f5.S													osr1.S
e2f6.S													osr2.L
e2f7.L													osr2.S
e2f8.L													otx2.L
e4f1.L													otx2.S
e4f1.S													pax3.L
edf1.L													pitx2.S
elf1.L													pitx3.L
erf.L													pknox2.L
ets2.L													pou3f1.L
ets2.S													pou3f1.S
etv1.L													pou6f1.L
etv1.S													rfx3.L
etv3.S													sebox.L
etv6.S													snai1.S
fos.L													snai2.L
fos.S													sox18.L
fosl2.L													tcf7.S
foxh1.2.L													thap7.L
foxh1.L													zbtb18.S
foxi2.L													zbtb24.L
foxi2.S													zbtb5.S
foxj1.L													zfp91.S
foxj1.S													znf507.L
foxk2.L													znf518b.S
foxk2.S													znf592.S
foxm1.S
foxn2.S
foxn3.L
foxr1.L
gabpa.L
gabpa.S
gatad1.L
gatad2a.L
gmeb1.L
gmeb1.S
grhl1.L
grhl1.S
grhl3.L
grhl3.S
gtf2i.S
gtf2ird1.S
gtf3a.L
gzf1.S
hes1.L
hes3.1.L
hes3.1.S
hes4.L
hif1a.L
hinfp.S
hmbox1.L
hmbox1.S
hmg20a.L
hmg20b.L
hmg20b.S
hmgb1.L
hmgb2.S
hmgb3.L
hmgb3.S
hmgxb3.L
hmgxb4.S
homez.L
homez.S
hsf1.L
hsf2.2.L
id2.L
id2.S
id3.L
id3.S
irf2.S
irf5.L
irf6.2.L
irf6.2.S
irf6.L
irf6.S
irf9.L
irx1.S
jarid2.L
jarid2.S
junb.L
junb.S
kdm5c.S
klf10.S
klf5.S
klf8.L
l3mbtl3.S
lcor.S
lhx5.L
lhx5.S
lin28a.L
lin28a.S
lin28b.S
maff.L
maff.S
max.L
mef2d.S
mier1.L
mier1.S
mlx.L
mlxip.L
msantd4.S
mta1.L
mta2.L
mtf1.L
mxd3.S
mxi1.L
mybl2.S
myc.L
mynn.L
mysm1.L
naif1.S
nfxl1.L
nfya.S
not.L
not.S
nr1i2.L
nrbf2.S
nrf1.L
pbrm1.L
pbx1.L
pbx1.S
pbx2.L
pbx2.S
pms1.S
pou2f1.S
pou5f3.1.L
pou5f3.1.S
pou5f3.2.L
pou5f3.2.S
pou5f3.3.L
pou5f3.3.S
ppara.S
prdm1.S
prdm15.S
prdm4.L
prdm9.L
rad54b.L
rara.S
rarg.S
rcor1.L
rcor2.L
rela.L
rfx2.L
rfx2.S
rfx5.S
rfx7.L
rlf.S
rxrb.L
rxrb.S
sall1.L
sall4.L
smad1.L
smad1.S
smad2.S
smad4.1.L
smad4.1.S
smad4.2.L
smad4.2.S
smad6.S
smarca5.S
smarcc1.L
smarcc1.S
smarcc2.L
smarce1.L
smarce1.S
sox11.L
sox11.S
sox13.S
sox15.L
sox17b.2.L
sox2.L
sox3.L
sox3.S
sox9.S
sp1.L
sp1.S
sp2.L
sp2.S
sp3.L
sp3.S
sp5l.L
sp5l.S
srf.L
srf.S
ssrp1.S
stat2.L
stat3.1.L
stat3.2.L
stox1.L
stox1.S
sub1.L
sub1.S
tada2a.L
tcf12.L
tcf12.S
tcf3.L
tcf3.S
tcf7l1.L
tcf7l1.S
tef.S
terf1.L
terf2.L
tfam.L
tfam.S
tfap2a.L
tfap2a.S
tfap2c.S
tfcp2.L
tfdp1.L
tfdp1.S
tfdp2.S
tgif1.L
tgif2.L
tgif2.S
thap1.L
thap1.S
thap4.S
tox4.L
tp53.L
trhd.S
tulp3.L
ubtf.L
ubtf.S
usf2.L
usf2.S
vegt.L
vegt.S
ventx2.1.S
vezf1.L
vezf1.S
wdhd1.L
whsc1.L
whsc1.S
wiz.L
xbp1.L
xbp1.S
ybx1.S
ybx2.L
ybx2.S
yy1.L
yy1.S
zbed4.L
zbed4.S
zbtb10.L
zbtb12.L
zbtb17.L
zbtb17.S
zbtb2.L
zbtb2.S
zbtb34.L
zbtb34.S
zbtb44.L
zbtb47.L
zbtb48.L
zbtb48.S
zbtb49.L
zfx.S
zhx2.S
zhx3.L
zhx3.S
zic1.L
zic2.L
zic2.S
znf131.L
znf131.S
znf143.L
znf217.L
znf217.S
znf276.S
znf277.L
znf281.L
znf281.S
znf319.S
znf335.L
znf335.S
znf384.L
znf518b.L
znf574.S
znf592.L
znf639.L
znf639.S
znf652.L
znf652.S
znf653.L
znf653.S
znf668.L
znf740.L
znf740.S
znf821.S
zzz3.L

## Sheet: Stage11
Gene Lists from all Overlapping Categories from UpSet Plots of all Transcription Factors expressed >10 TPM corresponding with Supplemental Figure 2
All_Lineages	Epi-Meso-Neur	Epi-Meso-Endo	Epi-Neur-Endo	Meso-Neur-Endo	Epi-Neur	Epi-Meso	Epi-Endo	Neur-Meso	Neur-Endo	Meso-Endo	Epi	Neur	Endo	Meso
adnp.L	creb3l2.L	42sp43.L	atf6.S	carhsp1.L	arnt.S	cdx2.L	gata3.L	creb1.L	arntl.S	bix1.1.L	epas1.L	atf3.L	bix1.1.S	cdx4.L
adnp.S	dlx5.L	erf.L	crx.S	csde1.S	elk1.L	creb3l4.S		lin28b.S	cebpa.S	bix1.2.L	foxi1.S	atf3.S	cebpa.L	cdx4.S
adnp2.L	dlx5.S	erf.S	etv3.S	egr1.L	etv6.S	dlx2.S		mybl2.L	crebrf.L	bix1.3.L	nr6a1.S	cebpb.S	dmbx1.S	evx1.L
adnp2.S	epas1.S	gata2.L	foxk2.S	fos.S	fosl2.L	dlx3.L			crx.L	bix1.3.S		cebpd.L	elf2.S	foxn2.S
arid2.L	foxh1.2.L	gata2.S	hmgxb3.L	foxd4l1.1.L	foxj1.L	dlx3.S			dmtf1.L	eomes.L		cebpd.S	elk4.S	foxp1.S
arid2.S	foxj1.S	id4.S	irx1.L	mynn.L	foxo4.L	dlx6.S			egr1.S	eomes.S		crebrf.S	foxa1.L	gpbp1l1.S
arid3a.L	foxk2.L	zfat.L	irx1.S	sox17a.L	hes2.L	elf1.S			fos.L	foxa4.L		egr2.L	foxa1.S	msx2.S
arid3a.S	foxm1.S	prdm1.L	irx2.L	zic3.L	hsf1.L	foxi1.L			fosl1.L	foxa4.S		elk4.L	foxa2.L	patz1.L
arid3b.L	foxr1.L	rreb1.S	junb.L	znf277.L	insm1.S	gli3.L			foxd4l1.1.S	gata3.S		fosl1.S	foxb1.L	plag1.S
arid4a.L	grhl1.S	smad6.L	junb.S		sox4.S	hesx1.L			hes1.S	hes7.2.L		fosl2.S	foxc1.S	smad2.L
arntl2.L	grhl3.L	smad7.S	maff.S		zfp91.S	msx1.L			hinfp.S	hsf2.L		foxd4l1.2.L	foxc2.L	stat5b.L
atf1.S	grhl3.S	sox17b.1.S	pou2f1.S			msx1.S			hmg20b.L	lef1.L		foxn4.L	foxn3.S	t.L
atf4.L	hes6.1.L	sox8.L	rere.S			msx2.L			hnf4g.L	lhx1.L		hand2.S	gata4.L	usf1.S
atf4.S	klf11.L	ventx1.1.L	smarcc2.L			mxi1.S			hoxc12.L	lhx1.S		hes7.1.L	gata4.S	zbtb26.S
carhsp1.S	klf11.S	ventx1.2.L	sox11.S			myt1.L			irf6.2.L	mespb.L		hoxd10.L	gata6.L	zbtb45.S
cdc5l.L	klf17.L	ventx1.2.S	zbtb21.L			smad7.L			irf9.L	mix1.L		insm1.L	gata6.S	znf142.L
cdc5l.S	klf2.L	ventx2.1.L	zbtb3.L			smad9.L			jun.S	mix1.S		irf8.S	gsc.L
cdx1.S	klf2.S	ventx2.2.L				sox18.S			jund.S	mixer.L		jun.L	gsc.S
cebpg.L	klf4.L					ventx1.1.S			lhx3.S	mixer.S		klf9.L	hhex.L
champ1.S	lhx5.L					ventx3.2.L			myod1.L	msantd4.L		mafb.S	hoxc10.L
creb1.S	lhx5.S					ventx3.2.S			nfx1.S	rlf.S		mga.L	irx3.L
crebzf.S	lin28b.L								nfxl1.L	snai1.L		mtf1.L	klf6.L
csde1.L	meis3.S								zic2.L	snai1.S		mypop.S	klf6.S
ctcf.L	smad6.S								zic2.S	sox17a.S		olig4.S	lhx3.L
ctcf.S	stat1.S									t.S		otx1.L	lhx8.S
dbp.L	tada2a.L									znf292.S		prdm14.S	zeb2.L
dnajc1.L	zbtb11.S											rest.L	mespb.S
dnajc1.S												rlf.L	myod1.S
dnajc2.S												sall3.S	nr2f1.L
dnajc21.L												sox21.L	olig4.L
e2f3.L												sox21.S	osr1.L
e2f3.S												srebf1.S	osr1.S
e2f4.S												usf3.S	osr2.L
e2f5.S												zbtb8a.1.S	osr2.S
e2f6.S												znf710.L	otx2.L
e2f7.L													otx2.S
e2f8.L													phox2b.S
e4f1.L													pitx2.S
e4f1.S													pitx3.L
edf1.L													pou3f1.S
edf1.S													pou6f1.L
elf1.L													prdm14.L
ets2.L													prdm15.L
ets2.S													sebox.L
etv1.L													sox18.L
etv1.S													tgif1.S
foxh1.L													tlx3.L
foxi2.L													zbtb18.S
foxn3.L													zeb2.S
gabpa.L													znf516.S
gabpa.S
gatad1.L
gatad2a.L
gmeb1.L
gmeb1.S
grhl1.L
gtf2i.S
gtf2ird1.S
gtf3a.L
gzf1.S
hes1.L
hes3.1.L
hes3.1.S
hes4.L
hif1a.L
hmbox1.L
hmbox1.S
hmg20a.L
hmg20b.S
hmgb1.L
hmgb2.S
hmgb3.L
hmgb3.S
hmgxb4.S
homez.L
homez.S
hsf2.2.L
id2.L
id2.S
id3.L
id3.S
irf5.L
irf6.2.S
irf6.L
irf6.S
jarid2.L
jarid2.S
kdm5c.S
klf10.S
klf5.S
klf8.L
l3mbtl3.S
lcor.S
lin28a.L
lin28a.S
maff.L
max.L
mier1.L
mier1.S
mlx.L
mlxip.L
msantd4.S
mta1.L
mta2.L
mxd3.L
mxd3.S
mxi1.L
mybl2.S
myc.L
myc.S
mysm1.L
naif1.S
nfya.S
not.L
not.S
nr1i2.L
nr4a1
nrbf2.S
nrf1.L
nrf1.S
pbrm1.L
pbx1.L
pbx1.S
pbx2.L
pbx2.S
phox2a.S
pms1.S
pou5f3.1.L
pou5f3.1.S
pou5f3.2.L
pou5f3.2.S
pou5f3.3.L
pou5f3.3.S
ppara.S
prdm1.S
prdm15.S
prdm2.S
prdm4.L
prdm9.L
rad54b.L
rara.S
rarg.L
rarg.S
rcor1.L
rcor2.L
rela.L
rfx2.L
rfx2.S
rfx5.S
rfx7.L
rxrb.L
rxrb.S
sall1.L
sall4.L
smad1.L
smad1.S
smad2.S
smad4.1.L
smad4.1.S
smad4.2.S
smarca5.S
smarcc1.L
smarcc1.S
smarce1.L
smarce1.S
sox11.L
sox13.S
sox15.L
sox17b.2.L
sox2.L
sox3.L
sox3.S
sox9.S
sp1.L
sp1.S
sp2.L
sp2.S
sp3.L
sp3.S
sp5l.L
sp5l.S
srf.L
srf.S
ssrp1.S
stat2.L
stat3.1.L
stat3.2.L
stox1.L
stox1.S
sub1.L
sub1.S
tcf12.L
tcf12.S
tcf3.L
tcf3.S
tcf7l1.L
tcf7l1.S
tef.S
terf1.L
terf2.L
tfam.L
tfam.S
tfap2a.L
tfap2a.S
tfap2c.S
tfcp2.L
tfdp1.L
tfdp1.S
tfdp2.S
tgif1.L
tgif2.L
tgif2.S
thap1.L
thap1.S
thap4.S
tox4.L
tp53.L
trhd.S
tulp3.L
ubtf.L
ubtf.S
usf2.L
usf2.S
vegt.L
vegt.S
ventx2.1.S
vezf1.L
vezf1.S
wdhd1.L
whsc1.L
whsc1.S
wiz.L
xbp1.L
xbp1.S
ybx1.S
ybx2.L
ybx2.S
yy1.L
yy1.S
zbed4.L
zbed4.S
zbtb10.L
zbtb12.L
zbtb17.L
zbtb17.S
zbtb2.L
zbtb2.S
zbtb34.L
zbtb34.S
zbtb44.L
zbtb47.L
zbtb48.L
zbtb48.S
zbtb49.L
zfx.L
zfx.S
zhx2.S
zhx3.L
zhx3.S
zic1.L
znf131.L
znf131.S
znf143.L
znf217.L
znf217.S
znf276.S
znf281.L
znf281.S
znf319.S
znf384.L
znf518b.L
znf574.S
znf592.L
znf639.L
znf639.S
znf652.L
znf652.S
znf653.L
znf653.S
znf668.L
znf740.L
znf740.S
znf821.S
zzz3.L

## Sheet: Stage12
Gene Lists from all Overlapping Categories from UpSet Plots of all Transcription Factors expressed >10 TPM corresponding with Supplemental Figure 2
All_Lineages	Epi-Meso-Neur	Epi-Meso-Endo	Epi-Neur-Endo	Meso-Neur-Endo	Epi-Neur	Epi-Meso	Epi-Endo	Neur-Meso	Neur-Endo	Meso-Endo	Epi	Neur	Endo	Meso
adnp.L	adnp2.L	erf.S	arntl2.L	dnajc1.S	foxj1.L	creb3l4.S	gata4.S	lin28b.S	cebpa.S	bix1.2.L	dlx2.L	atf3.L	42sp43.L	cdx2.S
adnp.S	arnt.S	gata2.L	atf6.S	foxa4.L	foxk2.L	dlx2.S	sox4.S	mtf1.L	cebpd.L	bix1.3.L	dlx6.L	atf3.S	arntl.S	cdx4.L
adnp2.S	cdx2.L	gata2.S	crx.S	gzf1.S	foxk2.S	dlx3.L	zhx1.S		cebpd.S	elf2.S	epas1.L	bhlhe40.L	bix1.1.L	cdx4.S
arid2.L	creb3l2.L	gata3.L	etv3.S	hmg20b.S	foxn4.L	dlx3.S			crx.L	hes7.2.L	esrrg.S	camta2.L	bix1.1.S	esr10.S
arid2.S	dlx5.S	gata3.S	irx1.S	irx3.L	hes2.L	e2f4.S			foxd4l1.1.L	mespb.L	foxj1.2.S	cebpb.S	bix1.3.S	evx1.L
arid3a.L	dlx6.S	id4.S	mxd3.L	mysm1.L	junb.L	elf1.S			foxd4l1.1.S	mespb.S	foxn4.S	cebpg.L	carhsp1.L	gpbp1l1.L
arid3a.S	elf1.L	klf6.L	phox2a.S	nr2f6.L	mybl2.L	foxi1.L			foxn3.S	mix1.L	hesx1.L	crebrf.L	cebpa.L	hes3.3.L
arid3b.L	epas1.S	lef1.L	rere.S	pms1.S		foxi1.S			hes1.S	mix1.S	insm1.S	crebrf.S	csde1.S	hes5.1.L
arid4a.L	erf.L	zfat.L	rfx7.L	sox17b.2.L		foxm1.S			irf9.L	mixer.L	kat7.S	egr1.L	ddit3.L	hes9.1.S
atf1.S	fosl2.L	msantd4.L	smarcc2.L	stox1.S		grhl1.S			irx1.L	mixer.S	myb.S	egr2.L	dmbx1.L	hoxd1.S
atf4.L	foxh1.2.L	msx1.L	usf3.S	tcf12.S		hic2.L			irx2.L	msgn1.L	pou2f3.L	elk1.L	dmbx1.S	msx2.S
atf4.S	foxh1.L	msx1.S	zbtb21.L	vegt.L		msx2.L			jund.S	msgn1.S	smad9.L	etv6.S	eomes.L	patz1.L
carhsp1.S	foxj1.S	rreb1.S	znf800.L	zbtb48.L		nr6a1.L			mynn.L	snai1.L	sox18.L	fos.L	eomes.S	sp7.S
cdc5l.L	foxo4.L	smad6.L		zic3.L		nr6a1.S			otx1.L	snai1.S	sox18.S	fos.S	ets1.L	t2.S
cdc5l.S	gli3.L	smad7.S		znf277.L		rlf.L			otx2.L	sox13.S	sox7.L	fosl1.L	foxa1.L	usf3.L
cdx1.S	grhl1.L	ventx1.1.L		znf292.S		smad7.L			otx2.S	sox17a.L	tbx3.L	fosl1.S	foxa1.S
champ1.S	grhl3.L	ventx1.1.S				smad9.S			rad54b.L	sox17a.S	ubp1.L	fosl2.S	foxa2.L
creb1.L	grhl3.S	ventx1.2.L				sox8.L			sox11.S	sox17b.1.S	zbtb46.S	foxd3.L	foxa4.S
creb1.S	kdm5c.S	ventx1.2.S				tbx2.L			tgif1.S	sp5.L	zbtb7b	foxd4l1.2.L	foxc1.L
crebzf.S	klf11.L	zbtb49.L				tbx3.S			zbtb8a.1.S	stat2.L	zfp91.S	hes7.1.L	foxc1.S
csde1.L	klf11.S	zzz3.S				ventx3.2.L			zic1.L	t.L	znf534.L	hinfp.S	foxc2.L
ctcf.L	klf17.L					ventx3.2.S			zic2.L	t.S		hmg20b.L	foxc2.S
ctcf.S	klf2.L					zbtb45.S			zic2.S			hoxd10.L	foxp4.S
dbp.L	klf2.S								znf143.L			hsf1.L	gata4.L
dlx5.L	klf4.L								znf821.S			irf8.S	gata5.L
dnajc1.L	lhx5.L											jun.L	gata5.S
dnajc2.S	lhx5.S											jun.S	gata6.L
dnajc21.L	maff.L											junb.S	gata6.S
e2f3.L	maff.S											klf9.L	gsc.L
e2f3.S	myt1.L											lhx3.S	gsc.S
e2f5.S	nr4a1											lin28b.L	gtf2ird1.S
e2f6.S	ppara.S											mga.L	helt.L
e2f7.L	smad6.S											myod1.L	hhex.L
e2f8.L	sox3.L											myt1.S	hnf1b.S
e4f1.L	stat1.S											ncor1.S	irx3.S
e4f1.S	tada2a.L											nfe2l2.L	klf6.S
edf1.L	tfap2c.S											nfxl1.L	lef1
edf1.S	zbtb11.S											nr4a1.L	lhx1.L
ets2.L	zbtb34.L											pou5f3.3.L	lhx1.S
ets2.S												pou5f3.3.S	zeb2.L
etv1.L												prdm14.L	mef2d.S
etv1.S												prdm14.S	meis2.S
foxn3.L												rest.L	meis3.L
gabpa.L												sall3.L	meox2.L
gabpa.S												sall3.S	mespa.S
gatad1.L												sox21.L	mnt.L
gatad2a.L												sox21.S	nfe2l1.L
gmeb1.L												sp7.L	olig4.L
gmeb1.S												srebf1.S	osr1.L
gpbp1l1.S												znf710.L	osr1.S
gtf2i.S													osr2.L
gtf3a.L													osr2.S
hes1.L													pax3.L
hes3.1.L													phox2b.L
hes3.1.S													pitx1.L
hes4.L													pitx2.S
hes6.1.L													prdm12.L
hif1a.L													prdm15.L
hmbox1.L													sebox.L
hmbox1.S													six1.L
hmg20a.L													snai2.S
hmgb1.L													sp5.S
hmgb2.S													stox1.L
hmgb3.L													tada2b.L
hmgb3.S													tbx2.S
hmgxb4.S													tbx20.L
homez.L													tlx3.L
homez.S													twist1.L
hsf2.2.L													zbtb8a.1.L
hsf2.L													znf516.L
id2.L													znf518a.L
id2.S													znf518a.S
id3.L													znf592.S
id3.S
irf5.L
irf6.2.S
irf6.L
irf6.S
jarid2.L
jarid2.S
klf10.S
klf5.S
klf8.L
l3mbtl3.S
lcor.S
lin28a.L
lin28a.S
max.L
meis3.S
mier1.L
mier1.S
mlx.L
mlxip.L
msantd4.S
mta1.L
mta2.L
mxd3.S
mxi1.L
mybl2.S
myc.L
myc.S
mypop.S
naif1.S
nfya.S
not.L
not.S
nr1i2.L
nrbf2.S
nrf1.L
nrf1.S
pbrm1.L
pbx1.L
pbx1.S
pbx2.L
pbx2.S
pou5f3.1.L
pou5f3.1.S
pou5f3.2.L
pou5f3.2.S
prdm1.L
prdm1.S
prdm15.S
prdm2.S
prdm4.L
prdm9.L
rara.S
rarg.L
rarg.S
rcor1.L
rcor2.L
rela.L
rfx2.L
rfx2.S
rfx5.S
rlf.S
rxrb.L
rxrb.S
sall1.L
sall4.L
smad1.L
smad1.S
smad2.S
smad4.1.L
smad4.1.S
smad4.2.S
smarca5.S
smarcc1.L
smarcc1.S
smarce1.L
smarce1.S
sox11.L
sox15.L
sox2.L
sox3.S
sox9.S
sp1.L
sp1.S
sp2.L
sp2.S
sp3.L
sp3.S
sp5l.L
sp5l.S
srf.L
srf.S
ssrp1.S
stat3.1.L
stat3.2.L
sub1.L
sub1.S
tcf12.L
tcf3.L
tcf3.S
tcf7l1.L
tcf7l1.S
tef.S
terf1.L
terf2.L
tfam.L
tfam.S
tfap2a.L
tfap2a.S
tfcp2.L
tfdp1.L
tfdp1.S
tfdp2.S
tgif1.L
tgif2.L
tgif2.S
thap1.L
thap1.S
thap4.S
tox4.L
tp53.L
trhd.S
tulp3.L
ubtf.L
ubtf.S
usf1.S
usf2.L
usf2.S
vegt.S
ventx2.1.L
ventx2.1.S
ventx2.2.L
vezf1.L
vezf1.S
wdhd1.L
whsc1.L
whsc1.S
wiz.L
xbp1.L
xbp1.S
ybx1.S
ybx2.L
ybx2.S
yy1.L
yy1.S
zbed4.L
zbed4.S
zbtb10.L
zbtb12.L
zbtb17.L
zbtb17.S
zbtb2.L
zbtb2.S
zbtb3.L
zbtb34.S
zbtb44.L
zbtb47.L
zbtb48.S
zfx.L
zfx.S
zhx2.S
zhx3.L
zhx3.S
znf131.L
znf131.S
znf217.L
znf217.S
znf276.S
znf281.L
znf281.S
znf319.S
znf384.L
znf518b.L
znf574.S
znf592.L
znf639.L
znf639.S
znf652.L
znf652.S
znf653.L
znf653.S
znf668.L
znf740.L
znf740.S
zzz3.L

## Sheet: Stage13
Gene Lists from all Overlapping Categories from UpSet Plots of all Transcription Factors expressed >10 TPM corresponding with Supplemental Figure 2
All_Lineages	Epi-Meso-Neur	Epi-Meso-Endo	Epi-Neur-Endo	Meso-Neur-Endo	Epi-Neur	Epi-Meso	Epi-Endo	Neur-Meso	Neur-Endo	Meso-Endo	Epi	Neur	Endo	Meso
adnp.L	arnt.S	e4f1.L	atf6.S	foxa4.L	foxh1.2.L	cdx4.L	gata4.S	e2f4.S	arntl2.L	bix1.2.L	atf5.2.S	arid4b.L	bix1.1.L	atf6b.L
adnp.S	cdx2.L	gata3.L	cebpd.L	foxn3.S	gli3.L	dlx2.L	gata6.S	hes6.1.L	cebpa.S	bix1.3.L	creb3.S	atf3.L	bix1.1.S	cdx1.L
adnp2.L	creb1.L	gata3.S	foxk2.L	irf5.L	hesx1.L	dlx2.S	isl1.L	lin28b.L	cebpd.S	csde1.S	dmrt2.L	atf3.S	bix1.3.S	cdx2.S
adnp2.S	creb3l2.L	gmeb2.L	hes1.S	mga.L	hsf1.L	esrrg.S	nfe2l1.L	lin28b.S	crx.L	elf2.S	dmrt2.S	bhlhe40.L	cebpa.L	cdx4.S
arid2.L	creb3l4.S	gpbp1l1.L	irx1.S	rest.L	junb.S	foxi1.L	smad6.L	sall3.L	crx.S	evx1.L	esrra.L	camta2.L	ddit3.L	esr10.S
arid2.S	dlx3.L	gzf1.S	junb.L	sox17b.2.L	klf11.L	foxi1.S	smad6.S	sp7.L	etv3.S	hes7.2.L	foxj1.2.L	cebpb.S	dnajc1.L	hes5.1.L
arid3a.L	dlx3.S	id4.S	maff.S	sp5l.S	lhx5.S	hes3.3.L			foxd4l1.1.L	mespb.L	foxj1.2.S	cebpg.L	dnajc1.S	hes5.1.S
arid3a.S	dlx6.S	klf6.L	mxd3.L	srebf1.S	maff.L	hes8.S			foxd4l1.1.S	mespb.S	foxk2.S	cic.L	eomes.L	hes8.L
arid3b.L	fosl2.L	klf6.S	mybl2.L	tcf12.L	myt1.L	hic2.L			foxp4.S	mix1.L	foxn4.S	crebrf.L	eomes.S	hes9.1.S
arid4a.L	foxj1.L	lef1.L	not.S	tcf12.S	myt1.S	klf12.S			hes7.1.L	mix1.S	gcm1.L	dlx6.L	ets1.L	hoxa1.S
atf1.S	foxj1.S	zfat.L	phox2a.S	tgif1.L	not.L	nr2c1.L			homez.L	mixer.L	hinfp.S	egr1.L	ets1.S	hoxa7.L
atf4.L	foxm1.S	meis3.L	prdm4.L	vegt.L		pou2f3.L			irx1.L	msgn1.L	irf2.L	elk1.L	etv2.L	hoxa7.S
atf4.S	grhl1.L	msx1.L	smarcc2.L	zic3.L		smad9.S			irx2.L	msx2.S	klf4.S	fezf2.L	foxa1.L	hoxa9.L
carhsp1.S	grhl1.S	msx1.S	zbtb21.L	znf668.L		sox8.L			irx3.L	mynn.L	myb.S	fos.L	foxa1.S	hoxb6.S
cdc5l.L	grhl3.L	msx2.L	znf143.L			tbx3.L			irx3.S	snai1.L	nfe2l3.S	fos.S	foxa2.L	hoxc6.S
cdc5l.S	grhl3.S	rlf.S				tbx3.S			lhx3.S	sox13.S	onecut1.2.S	fosl1.L	foxa4.S	hoxd1.S
cdx1.S	homez.S	smad7.L				usf3.L			mysm1.L	sox17a.L	pknox1.L	fosl1.S	foxc1.S	irf5.S
champ1.S	kat7.S	smad7.S				zbtb46.S			otx2.L	sox17a.S	smad9.L	fosl2.S	foxc2.L	msantd3.S
creb1.S	klf11.S	tbx2.L				znf534.L			otx2.S	sox17b.1.S	sox4.S	foxd3.L	gata4.L	msgn1.S
crebzf.S	klf2.L	tbx2.S				znf574.L			prdm1.S	sp5.L	sox7.L	hes2.L	gata5.L	myod1.S
csde1.L	klf2.S	ventx1.1.L							prdm9.L	ventx3.2.L	spdef.S	hesx1.S	gata5.S	patz1.L
ctcf.L	klf4.L	ventx1.1.S							sox11.S	zbtb49.L	ubp1.L	hoxd10.L	gata6.L	rlf.L
ctcf.S	lhx5.L	ventx1.2.L							tgif1.S	zbtb5.L	zbtb46.L	irf8.S	gli2.L	t.L
dbp.L	nfe2l1.S	ventx1.2.S							zbtb39.L	zbtb8a.1.L	zbtb7b	jun.L	glis3.S	t.S
dlx5.L	sox3.L	ventx3.2.S							zbtb8a.1.S	zeb2.S	zbtb7b.S	jun.S	gpbp1.L	t2.S
dlx5.S	sp7.S	zbtb45.S							zic1.L	znf277.L	zfpm1.S	jund.S	gsc.L	tbx6.S
dnajc2.S	stat1.S	zhx1.S							zic2.L	znf292.L		klf9.L	gsc.S	tcf7.S
dnajc21.L	tfap2c.S	znf319.S							zic2.S	znf292.S		mxd1.L	gtf2ird1.S	tox4.S
e2f3.L	zbtb11.S	znf516.L							znf710.L			myod1.L	hand2.S	zbtb11.L
e2f3.S	zbtb3.L	zzz3.S										naif1.S	hhex.L	zbtb26.S
e2f5.S	zbtb34.L											nfe2l2.L	hmg20b.S	zbtb33.L
e2f6.S	zfp91.S											nkx3-1.L	hnf1b.L	zbtb40.L
e2f7.L												nr4a1	hnf1b.S	zbtb8b.S
e2f8.L												nr4a1.L	irf9.L	zfp91.L
e4f1.S												otx1.L	lef1
edf1.L												otx1.S	lhx1.L
edf1.S												pax3.L	lhx1.S
elf1.L												pax3.S	maz.S
elf1.S												pax6.L	meis2.S
epas1.S												pou2f1.S	mespa.L
erf.L												prdm1.L	mespa.S
erf.S												prdm14.L	mixer.S
ets2.L												prdm14.S	osr1.L
ets2.S												rax.L	osr2.L
etv1.L												sall3.S	osr2.S
etv1.S												six3.L	phox2b.L
foxh1.L												six3.S	pitx2.S
foxn3.L												sox21.S	pms1.S
foxn4.L												tada2a.L	prdm12.L
foxo4.L												znf219.S	prdm15.L
gabpa.L													sebox.L
gabpa.S													six1.L
gata2.L													snai2.S
gata2.S													sox4.L
gatad1.L													stox1.L
gatad2a.L													stox1.S
gmeb1.L													tada2b.L
gmeb1.S													tbx1.L
gpbp1l1.S													tbx20.L
gtf3a.L													tlx3.L
hes1.L													twist1.L
hes3.1.L													twist1.S
hes3.1.S													zbtb45.L
hes4.L													znf516.S
hif1a.L													znf518a.S
hmbox1.L													znf592.S
hmbox1.S
hmg20a.L
hmgb1.L
hmgb2.S
hmgb3.L
hmgb3.S
hmgxb4.S
hsf2.2.L
hsf2.L
id2.L
id2.S
id3.L
id3.S
irf6.2.S
irf6.L
irf6.S
jarid2.L
jarid2.S
kdm5c.S
klf10.S
klf17.L
klf5.S
klf8.L
l3mbtl3.S
lcor.S
lin28a.L
lin28a.S
max.L
meis3.S
mier1.L
mier1.S
mlx.L
mlxip.L
mnt.L
msantd4.L
msantd4.S
mta1.L
mta2.L
mtf1.L
mxd3.S
mxi1.L
mybl2.S
myc.L
myc.S
mypop.S
nfya.S
nr1i2.L
nr2f6.L
nr6a1.L
nr6a1.S
nrbf2.S
nrf1.L
nrf1.S
pbrm1.L
pbx1.L
pbx1.S
pbx2.L
pbx2.S
pou5f3.1.L
pou5f3.1.S
pou5f3.2.L
pou5f3.2.S
ppara.S
prdm15.S
prdm2.S
rara.S
rarg.L
rarg.S
rcor1.L
rcor2.L
rela.L
rere.S
rfx2.L
rfx2.S
rfx5.S
rfx7.L
rreb1.S
rxrb.L
rxrb.S
sall1.L
sall4.L
smad1.L
smad1.S
smad2.S
smad4.1.L
smad4.1.S
smad4.2.S
smarca5.S
smarcc1.L
smarcc1.S
smarce1.L
smarce1.S
snai1.S
sox11.L
sox15.L
sox2.L
sox3.S
sox9.S
sp1.L
sp1.S
sp2.L
sp2.S
sp3.L
sp3.S
sp5l.L
srf.L
srf.S
ssrp1.S
stat3.1.L
stat3.2.L
sub1.L
sub1.S
tcf3.L
tcf3.S
tcf7l1.L
tcf7l1.S
tef.S
terf1.L
terf2.L
tfam.L
tfam.S
tfap2a.L
tfap2a.S
tfcp2.L
tfdp1.L
tfdp1.S
tfdp2.S
tgif2.L
tgif2.S
thap1.L
thap1.S
thap4.S
tox4.L
tp53.L
trhd.S
tulp3.L
ubtf.L
ubtf.S
usf1.S
usf2.L
usf2.S
usf3.S
vegt.S
ventx2.1.L
ventx2.1.S
ventx2.2.L
vezf1.L
vezf1.S
wdhd1.L
whsc1.L
whsc1.S
wiz.L
xbp1.L
xbp1.S
ybx1.S
ybx2.L
ybx2.S
yy1.L
yy1.S
zbed4.L
zbed4.S
zbtb10.L
zbtb12.L
zbtb17.L
zbtb17.S
zbtb2.L
zbtb2.S
zbtb34.S
zbtb44.L
zbtb47.L
zbtb48.L
zbtb48.S
zfx.L
zfx.S
zhx2.S
zhx3.L
zhx3.S
znf131.L
znf131.S
znf217.L
znf217.S
znf276.S
znf281.L
znf281.S
znf384.L
znf518a.L
znf518b.L
znf574.S
znf592.L
znf639.L
znf639.S
znf652.L
znf652.S
znf653.L
znf653.S
znf740.L
znf740.S
znf800.L
zzz3.L
