# Supplementary material for: Quantitative analysis of transcriptome dynamics provides novel insights into developmental state transitions
Source: BMC Genomics. 2022 Oct 23;23:723. doi: 10.1186/s12864-022-08953-3 (PMC9588240; doi:10.1186/s12864-022-08953-3)
Supplement: Supplementary file 12 — Additional file 12. Supplemental Table 3. Transcription Factor WGCNA Epidermal Modules. [file 12864_2022_8953_MOESM12_ESM.xlsx]

## Sheet: Epi
Transcription Factor WGCNA Epidermal Modules
Brown	Blue	Turquoise
hmgb3.S	sox3.S	hmgb3.L
smad4.1.S	sox3.L	hmgb2.L
pou5f3.2.L	pou5f3.2.S	hmgb2.S
sox15.L	sub1.S	ybx1.S
tfap2a.S	smarca5.S	pou5f3.3.L
ventx2.1.S	foxh1.2.L	ybx1.L
smarcc1.L	tp53.L	pou5f3.3.S
ventx2.1.L	tgif2.S	smarce1.L
ctcf.S	ventx2.2.S	sp5l.L
smad2.S	hmgb1	tcf3.S
smarcc1.S	id2.S	id3.L
tcf7l1.S	hmgb1.L	id3.S
e2f7.L	e2f3.S	wiz.L
klf2.S	tef.S	foxi2.L
ubtf.S	cdc5l.L	ctcf.L
e4f1.S	carhsp1.S	e2f5.L
rarg.S	hmg20a.L	znf281.S
ventx2.2.L	yy1.S	smarce1.S
arid4a.S	znf518b.L	rcor2.L
erf.S	ybx2.S	foxi2.S
znf131.L	etv1.S	tfap2a.L
kdm5b.S	grhl1.L	foxh1.L
nr1i2.L	champ1.S	tfap2c.S
dnajc21.L	hsf2.2.L	id2.L
mier3.L	homez.L	xbp1.L
sp2.L	atf1.S	zhx3.S
erf.L	irf5.L	hmgxb4.S
hes6.1.S	tgif2.L	edf1.L
zbed4.L	terf2.L	nfya.S
ncor1.L	ets2.S	csde1.L
kdm5b	znf217.L	yy1.L
hes4.L	etv4.L	smarca5
zhx2.S	ybx2.L	znf281.L
mxd3.L	srf.L	sox13.S
hsf2.L	pbx1.S	pou2f1.L
zfx.S	srf.S	tcf3.L
hes4.S	hif1a.L	mybl2.S
rlf.S	sall4.L	zhx3.L
klf17.L	terf1.L	ubtf.L
tshz1	znf276.S	max.L
zfx.L	lhx5.S	zic2.S
nr2c1.L	sp5l.S	smad1.L
zfpm1.S	zic1.S	arid1a
hes1.L	kat7.S	klf8.L
mtf1.L	thap4.S	atf1.L
sp2.S	irx1.S	pou5f3.1.L
rlf.L	arid2.S	mta2.L
smad9.L	lhx5.L	hmbox1.S
zbtb8b.L	irf6.2.S	trhd.S
prdm1.L	dnajc2.S	hes7.1.L
msantd4.L	arid3b.L	mier1.L
irf2.L	l3mbtl3.S	lcor.S
zbtb2.S	rxrb.L	atf4.L
znf518a.L	etv6.S	znf319.S
zbtb2.L	grhl1.S	adnp.S
nrf1.S	zfat.L	adnp2.S
pbx1.L	wdhd1.L	xbp1.S
nfe2l1.L	sall1	cebpg.L
gpbp1l1.L	not.L	msantd4.S
atf5.2.S	zbtb17.S	jarid2.L
gpbp1.L	sall1.L	smad4.2.S
znf516.L	stat1.S	e2f4.S
zbtb33.L	sox11.L	kdm5c.S
klf6.S	gtf2i.S	adnp.L
ventx1.2.S	pbrm1.S	dnajc1.L
gpbp1l1.S	not.S	znf639.S
sox9.S	jarid2.S	zbtb10.L
msantd2	znf653.S	tfdp2.S
atf6b.L	mysm1.L	kdm5c.L
phox2a.S	ets2.L	zic2.L
foxo3.L	znf219.L	tp53.S
ikzf4.S	dnajc2.L	grhl3.S
znf592.S	zzz3.L	irf2.S
arnt.L	tfdp1.S	gatad1.L
rfx1.L	tcf12.S	rcor1.L
znf770.L	sox2.L	znf143.S
klf15.2.L	myc.S	thap1
ventx1.1.L	thap1.L	znf335.L
znf574.L	rfx5.L	tox4.L
znf518a.S	mier1.S	irf6.2.L
elk4.S	zbtb48.S	e2f5.S
znf292.L	mef2d.S	mlx.L
prdm15.S	naif1.S	sp3.L
zbtb5.L	zic1.L	znf131.S
zbtb9.S	prdm1.S	gtf2ird1.S
elmsan1.L	pms1.S	hmbox1.L
tada2b.S	znf652.L	irf9.L
nfat5.L	tada2a.L	znf639.L
lin28a.L	stat2.L	e2f4.L
creb3l2.S	pbrm1.L	gabpa.L
klf11.L	sall4.S	zbtb34.S
zfpm1	gtf3a.L	zbed4.S
hesx1.L	znf668.L	arid2.L
elk4.L	gatad2a.S	homez.S
bix1.1.L	nr6a1.S	pou2f1.S
ventx1.2.L	sox17b.1.L	foxh1.S
crx.S	snapc4	grhl3.L
mxi1.S	mta1.S	rfx2.S
klf4	sox11.S	e4f1.L
hes1.S	znf277.L	tfdp2.L
irx2.S	tulp4.L	e2f8.L
stat3.2.L	stox1.L	lin28a.S
prdm14.L	tgif1.L	nrbf2.S
cdx1.S	rxrb.S	ets1.S
klf9.L	smarcc2.L	etv3.L
runx1	rad54b.L	rfx7.L
sox18.S	tfcp2.L	e2f3.L
fosl2.L	stox1.S	arid3a.L
	klf6.L	rela.L
	zbtb17.L	sp1.L
	elk1.L	tcf7l1.L
	smad6.S	aebp2.S
	stat3.1.L	thap7.L
	znf407.L	sp3.S
	pknox2.L	znf821.S
	crebrf.S	zbtb49.L
	arntl2.L	pou5f3.1.S
	sox21.S	max.S
	epas1.L	rfx2.L
	smad6.L	mta2.S
	sox21.L	pbx2.L
	dmtf1.S	hmg20b.S
	tulp3.L	zbtb47.L
	tcf12.L	nfxl1.L
	gtf2i	thap1.S
	lin28b.L	tfap4.L
	elf1.S	ets1.L
	znf407.S	terf2.S
	irx1.L	zbtb47.S
	zhx1.L	atf6.S
	prdm2.S	zhx2
	zbtb45.S	vegt.L
	rere.S	smad1.S
	sox17a.S	zbtb34.L
	foxo4.L	pbx2.S
	usf3.L	znf574.S
	zic3.L	lin28b.S
	zbtb11.S	hmgxb3.L
	mybl2.L	dnajc1.S
	znf292.S	msantd3.L
	snai1.S	arid3b.S
	zic3.S	foxn2.S
	creb3.S	arid4b.L
	rere	etv3.S
	trhd.L	usf2.L
	crem.S	hmg20b.L
	zzz3.S	six4.L
	sox17a.L	e2f6.S
	usf1.S	smarcc2.S
	zbtb21.L	hinfp.S
	pknox1.L	foxm1.S
	klf12.S	ppara.S
	nfe2l3.S	tfap2c.L
	prdm14.S	mlxip.S
	hey1.L	dlx5.S
	cebpd.L	prdm4.L
	hmg20a.S	znf335.S
	zbtb46.S	smad2.L
	rcor1	dmtf1.L
	irx2.L	e2f7.S
	znf800.L	znf652.S
	foxn4.S	maz.S
	eomes.L	adnp2.L
	nr2f6.L	nr1i2.S
	gmeb2.L	nfx1.S
	znf236.L	myc.L
	nr1h2.L	arntl.S
	sp7.L	zbtb8b.S
	hes7.2.L	epas1.S
	mnt.L	zbtb5.S
	nfe2l1.S	ncor1.S
	sox17b.1.S	znf142.L
	creb1.L	lcor.L
	gmeb2.S	msantd3.S
	sp7.S	znf217.S
	zbtb7b.S	hsf1.S
	nr2f6	foxd4l1.1.L
	insm1.L	gzf1.S
	zfp91.L	bach1.L
	crx.L	sp1.S
	esrra.L	srebf2.L
	tp63.S	znf710.L
	zbtb46.L	mynn.L
	sox7.L	etv6.L
	dlx1	tfdp1.L
	ubp1.L	vegt.S
	cebpd.S	rest.L
	bix1.2.L	znf526.S
	foxj1.2.L	tfam.S
	nr6a1.L	zbtb6.S
	foxn4.L	tfap4.S
	pou2f3.L	mxd1.L
	dlx2.L	tcf7.S
	tbx20.L	gmeb1.S
	tp73	maz
	fosl2.S	znf319.L
	znf534.L	zbtb41.L
	irf8.S	csde1.S
	hes5.1.S	elf1.L
	ovol1.L	ppara.L
	tbx3.L	znf618.S
	smad9.S	zbtb33.S
	klf4.S	znf518b.S
	tbx2.S	smad4.2.L
	foxj1.2.S	creb1.S
	myb.S	znf646.L
	spdef.S	ikzf5.L
	gata3.S	junb.L
	id4.S	zbtb10.S
	dmrt2.S	elmsan1.S
	pparg.S	znf143.L
	prox1.S	klf5.L
	foxa1.S	nfatc3.S
	gata6.S	usf3.S
	onecut1.2.S	mef2d.L
	myb.L	srebf1.S
	gcm1.L	mkx.S
	tbx3.S	e2f1.S
	isl1.S	foxn2.L
	lhx3.S	figla.L
		foxn3.S
		znf526.L
		znf653.L
		meis3.S
		klf5.S
		rxrg.L
		cux1.S
		thap7.S
		zbtb24.L
		zbtb48.L
		znf507.L
		rara.S
		klf4.L
		mier2.S
		nr2c1.S
		foxk2.L
		nfatc3.L
		vezf1.L
		prdm10.L
		znf507.S
		znf367.S
		bcl11a.L
		hlf.S
		znf592.L
		znf423.L
		tox2.L
		znf646.S
		atf4.S
		rel.S
		hdx.S
		mxi1.L
		six4.S
		klf11.S
		hes7.1.S
		ikzf2.L
		plag1.S
		hic2.L
		arid5b.L
		hes2.L
		mga.L
		ovol2
		rfx3.L
		glis2.L
		fos.S
		tox4.S
		aebp2.L
		dlx3.S
		gatad2a.L
		foxj3.S
		mypop.L
		arid4b.S
		camta2.L
		pbx3.S
		srebf2.S
		foxo3.S
		satb1.S
		mlxip.L
		zfp64.L
		foxp1.S
		rfx7
		bach1.S
		mier2.L
		rbpj.L
		stox2
		zbtb26.S
		atf6.L
		cux1.L
		elf2.S
		nr3c2.L
		znf516.S
		znf521.S
		rbpj.S
		crebrf.L
		znf668.S
		foxd4l1.1.S
		gmeb1.L
		wiz.S
		junb.S
		hbp1.L
		vezf1.S
		hinfp.L
		patz1.L
		foxj3.L
		bbx.L
		gtf2ird1.L
		atf5.L
		crem.L
		zbtb3.S
		smad4.1.L
		ncor2.S
		nr3c2.S
		arid4a.L
		klf15.2.S
		irf8.L
		fos.L
		zbtb37.S
		mxd1.S
		e2f1.L
		carhsp1.L
		bcl6.L
		arnt.S
		otx1.L
		znf740.S
		zbtb8a.1.S
		kat7.L
		gli3.L
		tfeb.S
		rfx1.S
		pbx3
		prdm2.L
		sox4.S
		dlx5.L
		foxp1.L
		klf10.S
		mix1.L
		dlx6.S
		42Sp43.L
		smad7.S
		znf740.L
		smad7.L
		bnc1.L
		bcl6.S
		edf1.S
		sox4.L
		zfhx3.S
		ventx3.2.S
		jund.S
		crebzf.S
		cebpb.S
		kdm5a
		ventx1.1.S
		kmt2c.S
		rreb1.L
		atf5
		creb3l2.L
		rreb1.S
		nfatc2.S
		myt1.L
		rarg.L
		nr1d1
		foxd4l1.2.L
		mef2c.L
		dlx3.L
		creb3l4.S
		trerf1.S
		msx1.L
		tfap2e.S
		foxj1.S
		sox7.S
		mef2a.S
		foxi1.L
		klf10.L
		mypop.S
		zbtb7b.L
		zhx1.S
		creb3l4.L
		id4.L
		ventx3.2.L
		foxj1.L
		myt1.S
		gata4.S
		hes7.2.S
		meis3.L
		dlx2.S
		lhx8.S
		sox8.L
		dlx6.L
		msx2.S
		msx2.L
		rarg
		tbx2.L
		gata5.S
		foxi1.S
		lef1.L
		msx1.S
		esrrg.S
		cdx2.L
		cdx4.L
		znf474.S
		fosl1.L
		gata2.L
		sox18.L
		gata2.S
		prrx1.S
		gata3.L

## Sheet: Meso
Transcription Factor WGCNA Mesodermal Modules
Brown	Green	Turquoise	Red	Yellow
adnp2.L	bix1.2.L	42Sp43.L	ctcf.L	ctcf.L
atf4.L	bix1.3.L	adnp.L	eomes.L	eomes.L
fosl2.L	cebpa.L	aebp2.L	grhl1.L	grhl1.L
foxi1.L	egr1.L	arid2.L	hic2.L	hic2.L
foxj1.L	foxa4.L	arid3a.L	mier3.L	mier3.L
grhl3.L	hes7.2.L	arid3b.L	rxrb.L	rxrb.L
id3.L	lhx1.L	arid4a.L	smad6.L	smad6.L
klf17.L	mix1.L	arid4b.L	tcf3.L	tcf3.L
mtf1.L	mixer.L	arid5b.L	zzz3.L	zzz3.L
mxi1.L	mybl2.L	arnt.L	arid3b.S	arid3b.S
ncor1.L	osr1.L	arntl2.L	carhsp1.S	carhsp1.S
patz1.L	osr2.L	atf1.L	ctcf.S	ctcf.S
pax6.L	snai1.L	atf6.L	eomes.S	eomes.S
pou5f3.1.L	sox17a.L	atf6b.L	foxp4.S	foxp4.S
rlf.L	sox17b.1.L	bach1.L	gabpa.S	gabpa.S
smarcc1.L	tgif1.L	bbx.L	gpbp1l1.S	gpbp1l1.S
sox18.L	vegt.L	bcl11a.L	grhl1.S	grhl1.S
sox8.L	bix1.1.S	bcl6.L	hes4.S	hes4.S
ubtf.L	bix1.3.S	bix1.1.L	hmg20a.S	hmg20a.S
ventx1.1.L	egr1.S	bnc1.L	mafb.S	mafb.S
ventx1.2.L	foxa4.S	camta2.L	mier3.S	mier3.S
ventx2.1.L	foxd4l1.1.S	carhsp1.L	nrf1.S	nrf1.S
ventx2.2.L	hes7.2.S	cdx2.L	pbrm1.S	pbrm1.S
zbed4.L	lhx1.S	cdx4.L	smad1.S	smad1.S
znf131.L	mix1.S	cebpg.L	ssrp1.S	ssrp1.S
znf516.L	mixer.S	cic.L	tcf3.S	tcf3.S
znf770.L	osr2.S	creb1.L	tfdp1.S	tfdp1.S
adnp2.S	sox17a.S	creb3l2.L	usf2.S	usf2.S
dlx5.S	sox17b.1.S	crebrf.L	zfx.S	zfx.S
e2f6.S	sox4.S	crem.L	zhx2.S	zhx2.S
e2f7.S	stox1.S	csde1.L	mta1	mta1
erf.S	tox4.S	cux1.L	zhx2	zhx2
foxj1.S	vegt.S	dlx3.L
grhl3.S	zbtb18.S	dlx5.L
hmgb3.S	znf217.S	dmtf1.L
id3.S		dnajc1.L
lcor.S		dnajc2.L
meis3.S		e2f1.L
mier1.S		e2f3.L
nfat5.S		e2f4.L
phox2a.S		e2f5.L
pou5f3.1.S		e2f8.L
prdm15.S		e4f1.L
rarg.S		edf1.L
rlf.S		elf1.L
satb1.S		elf2.L
six4.S		elk1.L
smad7.S		elk4.L
tada2b.S		epas1.L
tfap4.S		erf.L
ubtf.S		ets1.L
ventx2.2.S		ets2.L
zbed4.S		etv3.L
znf507.S		etv6.L
znf516.S		evx1.L
znf526.S		figla.L
znf592.S		fos.L
msantd2		fosl1.L
phox2a		foxc2.L
sall1		foxd4l1.1.L
tshz1		foxd4l1.2.L
		foxh1.L
		foxi2.L
		foxj3.L
		foxn2.L
		foxn4.L
		foxo3.L
		foxp1.L
		foxq1.L
		gabpa.L
		gata2.L
		gata3.L
		gata6.L
		gatad1.L
		gatad2a.L
		gcm1.L
		gli3.L
		gmeb1.L
		gpbp1.L
		gtf3a.L
		hbp1.L
		hes1.L
		hes2.L
		hes7.1.L
		hif1a.L
		hinfp.L
		hmbox1.L
		hmg20b.L
		hmgb2.L
		hmgb3.L
		hmgxb3.L
		homez.L
		id2.L
		id4.L
		ikzf2.L
		ikzf5.L
		insm1.L
		irf2.L
		irf5.L
		irf6.2.L
		irf8.L
		irf9.L
		irx1.L
		irx3.L
		jarid2.L
		junb.L
		kat7.L
		kdm5c.L
		klf10.L
		klf15.2.L
		klf2.L
		klf4.L
		klf5.L
		klf8.L
		lcor.L
		lcorl.L
		lef1.L
		lhx3.L
		lin28a.L
		lin28b.L
		max.L
		mef2d.L
		meis3.L
		mespb.L
		mier1.L
		mlx.L
		mlxip.L
		msantd3.L
		msantd4.L
		msx1.L
		msx2.L
		mta2.L
		mxd1.L
		mxd3.L
		myb.L
		myc.L
		mynn.L
		mypop.L
		mysm1.L
		myt1.L
		nfatc1.L
		nfatc3.L
		nfe2l1.L
		nfxl1.L
		nr1i2.L
		nr2c1.L
		nr3c1.L
		nr3c2.L
		nrbf2.L
		otx1.L
		pbx1.L
		pbx2.L
		pknox2.L
		plag1.L
		pou2f1.L
		pou2f3.L
		pou5f3.3.L
		ppara.L
		prdm10.L
		prdm2.L
		prdm4.L
		rad54b.L
		rarg.L
		rbpj.L
		rcor1.L
		rcor2.L
		rela.L
		rest.L
		rfx1.L
		rfx2.L
		rfx3.L
		rfx7.L
		rreb1.L
		rxrg.L
		sall1.L
		sall3.L
		satb1.L
		smad1.L
		smad2.L
		smad4.1.L
		smad4.2.L
		smad7.L
		smad9.L
		smarcc2.L
		smarce1.L
		sox11.L
		sox21.L
		sox3.L
		sox7.L
		sp1.L
		sp2.L
		sp5l.L
		srebf2.L
		srf.L
		stat1.L
		stat2.L
		stat3.2.L
		stat5b.L
		stox1.L
		sub1.L
		tbx2.L
		tbx3.L
		tcf12.L
		tfam.L
		tfap2c.L
		tfap4.L
		tfdp1.L
		tfdp2.L
		thap7.L
		tox4.L
		tp53.L
		trhd.L
		tulp3.L
		tulp4.L
		ubp1.L
		usf2.L
		ventx3.2.L
		vezf1.L
		wiz.L
		xbp1.L
		ybx1.L
		ybx2.L
		yy1.L
		zbtb10.L
		zbtb12.L
		zbtb17.L
		zbtb2.L
		zbtb24.L
		zbtb34.L
		zbtb40.L
		zbtb41.L
		zbtb45.L
		zbtb47.L
		zbtb48.L
		zbtb49.L
		zbtb8a.1.L
		zbtb8b.L
		zbtb9.L
		zeb2.L
		zfat.L
		zfp64.L
		zhx1.L
		zhx3.L
		zic1.L
		zic2.L
		zic3.L
		znf142.L
		znf143.L
		znf217.L
		znf277.L
		znf281.L
		znf319.L
		znf335.L
		znf384.L
		znf407.L
		znf410.L
		znf423.L
		znf507.L
		znf518b.L
		znf526.L
		znf592.L
		znf628.L
		znf639.L
		znf644.L
		znf646.L
		znf652.L
		znf653.L
		znf668.L
		znf710.L
		znf711.L
		znf740.L
		znf800.L
		zxdc.L
		adnp.S
		aebp2.S
		arid2.S
		arid4b.S
		arnt.S
		arntl.S
		atf1.S
		atf4.S
		atf5.2.S
		atf6.S
		bach1.S
		bcl11b.S
		bcl6.S
		bnc1.S
		cdc5l.S
		cdx1.S
		cdx4.S
		cebpg.S
		champ1.S
		creb1.S
		creb3l2.S
		creb3l4.S
		crebrf.S
		crebzf.S
		crem.S
		csde1.S
		cux1.S
		dlx2.S
		dlx3.S
		dlx6.S
		dmtf1.S
		dnajc1.S
		e2f1.S
		e2f3.S
		e2f4.S
		e2f5.S
		e4f1.S
		edf1.S
		elk4.S
		elmsan1.S
		epas1.S
		esrra.S
		esrrg.S
		ets1.S
		etv3.S
		etv6.S
		fos.S
		foxh1.S
		foxi1.S
		foxi2.S
		foxj3.S
		foxk2.S
		foxm1.S
		foxn2.S
		foxn3.S
		foxo3.S
		foxo6.S
		foxp1.S
		gata2.S
		gata3.S
		gata4.S
		gata5.S
		gata6.S
		gatad2a.S
		gmeb1.S
		grhl2.S
		gsc.S
		gtf2i.S
		gtf2ird1.S
		gzf1.S
		hdx.S
		hes1.S
		hes6.1.S
		hes7.1.S
		hinfp.S
		hlf.S
		hmbox1.S
		hmg20b.S
		hmgb2.S
		hmgxb4.S
		homez.S
		hsf1.S
		id2.S
		ikzf4.S
		irf2.S
		irf6.S
		irf6.2.S
		irf9.S
		irx1.S
		jarid2.S
		junb.S
		jund.S
		kat7.S
		kdm5c.S
		klf10.S
		klf11.S
		klf12.S
		klf15.2.S
		klf5.S
		kmt2c.S
		lin28a.S
		lin28b.S
		maff.S
		max.S
		maz.S
		mef2a.S
		mef2d.S
		mespa.S
		mespb.S
		mier2.S
		mlxip.S
		msantd3.S
		msantd4.S
		msx1.S
		msx2.S
		mta1.S
		mxd1.S
		myb.S
		mybl2.S
		myod1.S
		mypop.S
		myt1.S
		ncor1.S
		ncor2.S
		nfatc2.S
		nfatc3.S
		nfe2l1.S
		nfe2l2.S
		nfx1.S
		nfya.S
		nr1i2.S
		nr2c1.S
		nr3c2.S
		nrbf2.S
		patz1.S
		pbx2.S
		pbx3.S
		plag1.S
		pms1.S
		pou2f1.S
		pou5f3.3.S
		ppara.S
		prdm14.S
		rbpj.S
		rel.S
		rfx2.S
		rreb1.S
		rxrb.S
		smad2.S
		smad4.2.S
		smad6.S
		smarca5.S
		smarcc1.S
		smarcc2.S
		smarce1.S
		snai1.S
		sox11.S
		sox13.S
		sox3.S
		sox7.S
		sox9.S
		sp1.S
		sp2.S
		sp3.S
		sp5l.S
		sp7.S
		sp8.S
		spdef.S
		srebf1.S
		srebf2.S
		tbx2.S
		tbx3.S
		tcf4.S
		tcf7.S
		tef.S
		terf2.S
		tfam.S
		tfap2c.S
		tfdp2.S
		tfeb.S
		thap1.S
		thap7.S
		tp53.S
		trerf1.S
		trhd.S
		usf1.S
		usf3.S
		ventx1.1.S
		ventx1.2.S
		ventx2.1.S
		ventx3.2.S
		vezf1.S
		wiz.S
		xbp1.S
		ybx1.S
		yy1.S
		zbtb10.S
		zbtb11.S
		zbtb2.S
		zbtb26.S
		zbtb33.S
		zbtb34.S
		zbtb37.S
		zbtb45.S
		zbtb46.S
		zbtb47.S
		zbtb5.S
		zbtb6.S
		zbtb7b.S
		zbtb8a.2.S
		zbtb8b.S
		zbtb9.S
		zeb2.S
		zfpm1.S
		zhx1.S
		zhx3.S
		zic2.S
		zic3.S
		znf131.S
		znf143.S
		znf281.S
		znf319.S
		znf335.S
		znf362.S
		znf367.S
		znf518b.S
		znf521.S
		znf574.S
		znf618.S
		znf639.S
		znf646.S
		znf652.S
		znf653.S
		znf710.S
		znf740.S
		znf800.S
		znf821.S
		arid1a
		atf5
		gtf2i
		hlx
		kdm5a
		maz
		ovol2
		rfx7
		samd11
		smarca5
		snapc4
		stox2
		tbx6
		thap1
		zfpm1

## Sheet: Endo
Transcription Factor WGCNA Endodermal Modules
Blue	Yellow	Brown	Turquoise
bix1.1.L	aebp2.L	arid3a.L	foxa2.L
bix1.2.L	arid3b.L	cic.L	foxb1.L
bix1.3.L	arid4a.L	e2f1.L	foxc1.L
cux2.L	cebpd.L	elmsan1.L	foxc2.L
e2f7.L	drgx.L	erf.L	foxh1.L
en1.L	egr1.L	ets1.L	foxh1.2.L
eomes.L	egr2.L	foxk2.L	foxi2.L
ets2.L	fos.L	foxo3.L	foxj3.L
etv4.L	foxn3.L	gatad2a.L	foxn2.L
fosl1.L	foxn4.L	gpbp1.L	gabpa.L
fosl2.L	foxo4.L	gpbp1l1.L	gata3.L
foxa4.L	gli2.L	hes7.1.L	gata4.L
foxj1.L	gmeb2.L	hesx1.L	gata5.L
gata2.L	grhl2.L	hmgb1.L	gata6.L
gsc.L	gzf1.L	hoxc10.L	gatad1.L
hes2.L	hnf1b.L	hsf2.L	glis2.L
hes4.L	hnf4g.L	id2.L	gmeb1.L
hes6.1.L	hoxd1.L	kdm5c.L	grhl1.L
hes7.2.L	isl1.L	klf17.L	grhl3.L
hhex.L	mlxip.L	mga.L	gtf2ird1.L
hoxc12.L	mnt.L	msantd4.L	gtf3a.L
ikzf2.L	msx1.L	mtf1.L	hbp1.L
jun.L	myc.L	mybl2.L	helt.L
klf15.2.L	myod1.L	olig4.L	hes1.L
lhx1.L	nfe2l1.L	patz1.L	hic1.L
lhx3.L	nr2f6.L	pbrm1.L	hic2.L
mespb.L	nr4a1.L	plag1.L	hif1a.L
mix1.L	nr6a1.L	pou5f3.2.L	hinfp.L
mixer.L	pbx1.L	prdm1.L	hmbox1.L
mxd3.L	pbx2.L	prdm14.L	hmg20a.L
nr2f1.L	smad6.L	rela.L	hmg20b.L
osr1.L	sox4.L	rest.L	hmgb2.L
osr2.L	sp1.L	satb1.L	hmgb3.L
otx2.L	sp3.L	smarcc2.L	hmgxb3.L
pitx2.L	tada2b.L	sox7.L	homez.L
pitx3.L	tbx1.L	tox2.L	hsf2.2.L
pou3f1.L	tbx3.L	usf3.L	id3.L
pou6f1.L	terf1.L	zbtb12.L	id4.L
prdm2.L	tfcp2.L	zbtb14.L	ikzf5.L
rfx5.L	ubtf.L	zbtb33.L	insm1.L
rxrb.L	ventx3.2.L	zbtb5.L	irf2.L
snai1.L	wdhd1.L	zeb2.L	irf5.L
snai2.L	xbp1.L	znf131.L	irf6.2.L
sox17a.L	zbtb17.L	znf292.L	irf8.L
sox17b.1.L	zbtb39.L	znf516.L	irf9.L
sox18.L	zbtb44.L	znf574.L	irx1.L
sox8.L	zbtb45.L	znf652.L	irx2.L
stat3.2.L	zbtb48.L	znf710.L	irx3.L
stox1.L	zbtb8a.1.L	zzz3.L	jarid2.L
tfap4.L	zfat.L	e2f1.S	junb.L
tgif1.L	zhx3.L	e4f1.S	klf10.L
thap1.L	zic2.L	elf1.S	klf2.L
vegt.L	znf236.L	erf.S	klf4.L
zbtb10.L	znf592.L	ets1.S	klf5.L
zfx.L	znf668.L	foxd4l1.1.S	klf6.L
znf219.L	arntl.S	gpbp1l1.S	klf8.L
znf518a.L	dlx3.S	hmg20a.S	lcor.L
arid4a.S	dnajc2.S	kdm5b.S	lcorl.L
atf6.S	egr1.S	klf11.S	lef1.L
atf6b.S	elk4.S	klf5.S	lhx5.L
bix1.1.S	fos.S	lhx8.S	lin28a.L
bix1.2.S	foxn3.S	mybl2.S	lin28b.L
bix1.3.S	foxp4.S	myod1.S	max.L
elf2.S	glis3.S	nr6a1.S	mef2d.L
eomes.S	hoxd1.S	otx2.S	meis3.L
fosl1.S	irf6.2.S	pou5f3.2.S	meox2.L
foxa4.S	mier3.S	prdm2.S	mespa.L
foxj1.S	msx2.S	smad6.S	mier1.L
gsc.S	mta1.S	sp4.S	mier2.L
hes4.S	mxi1.S	tada2b.S	mier3.L
hes7.2.S	myc.S	tcf12.S	mlx.L
hhex.S	nfatc2.S	tfdp2.S	mnx1.L
hoxc13.S	nfya.S	usf3.S	msantd3.L
jun.S	nrl.S	zbtb45.S	msgn1.L
klf10.S	pbx1.S	zeb2.S	msx2.L
lhx1.S	pbx2.S	zfx.S	mta2.L
lhx3.S	sp1.S	zic1.S	mxd1.L
mafb.S	sub1.S	zic2.S	mxi1.L
mespa.S	tbx3.S	znf516.S	mynn.L
mespb.S	ventx3.2.S	znf518a.S	mypop.L
mix1.S	zbtb8a.1.S	znf592.S	mysm1.L
mixer.S	znf217.S	znf652.S	ncor1.L
mxd1.S	znf292.S	zzz3.S	nfat5.L
mxd3.S	hlx	cic	nfatc3.L
nfe2l2.S	mta1	kdm5b	nfkb2.L
nrbf2.S	nkx2-1	nfil3	nfxl1.L
onecut2.S		nr2f6	not.L
osr1.S		rere	nr1i2.L
osr2.S		sall1	nr2c1.L
pax3.S		shox2	nr3c1.L
pitx2.S			nr3c2.L
pou3f1.S			nrf1.L
smad7.S			otx1.L
snai1.S			pax3.L
sox17b.1.S			phox2b.L
sox18.S			pitx1.L
tfap4.S			pknox2.L
tgif2.S			pou2f1.L
vegt.S			pou5f3.1.L
zbtb17.S			pou5f3.3.L
zbtb18.S			ppara.L
zbtb48.S			prdm10.L
znf668.S			prdm12.L
hoxc10			prdm15.L
msantd2			prdm4.L
runx1			rad54b.L
			rarg.L
			rbpj.L
			rcor1.L
			rcor2.L
			rfx2.L
			rfx3.L
			rfx7.L
			rlf.L
			rreb1.L
			rxrg.L
			sall1.L
			sall4.L
			sebox.L
			six1.L
			six4.L
			smad1.L
			smad2.L
			smad4.1.L
			smad4.2.L
			smad9.L
			smarcc1.L
			smarce1.L
			sox11.L
			sox15.L
			sox2.L
			sox21.L
			sox3.L
			sox9.L
			sp2.L
			sp5.L
			sp5l.L
			sp7.L
			srebf2.L
			srf.L
			stat1.L
			stat2.L
			stat3.1.L
			sub1.L
			tada2a.L
			tbx2.L
			tbx20.L
			tcf12.L
			tcf3.L
			tcf7l1.L
			terf2.L
			tfam.L
			tfap2c.L
			tfdp1.L
			tfdp2.L
			tgif2.L
			thap7.L
			tlx3.L
			tox4.L
			tp53.L
			trhd.L
			tulp3.L
			tulp4.L
			twist1.L
			usf2.L
			ventx1.1.L
			ventx1.2.L
			ventx2.1.L
			ventx2.2.L
			vezf1.L
			wiz.L
			ybx1.L
			ybx2.L
			yy1.L
			zbed4.L
			zbtb2.L
			zbtb24.L
			zbtb3.L
			zbtb34.L
			zbtb41.L
			zbtb47.L
			zbtb49.L
			zbtb8b.L
			zfp64.L
			zhx1.L
			zic1.L
			zic3.L
			zic5.L
			znf142.L
			znf143.L
			znf217.L
			znf277.L
			znf281.L
			znf319.L
			znf335.L
			znf384.L
			znf407.L
			znf410.L
			znf423.L
			znf507.L
			znf518b.L
			znf526.L
			znf628.L
			znf639.L
			znf646.L
			znf653.L
			znf711.L
			znf740.L
			znf770.L
			znf800.L
			adnp.S
			adnp2.S
			aebp2.S
			arid2.S
			arid3a.S
			arid3b.S
			arid4b.S
			arid5b.S
			atf1.S
			atf4.S
			atf5.2.S
			bach1.S
			bcl11b.S
			bcl6.S
			bnc1.S
			carhsp1.S
			cdc5l.S
			cdx1.S
			cebpa.S
			cebpb.S
			cebpd.S
			champ1.S
			creb1.S
			creb3l2.S
			crebrf.S
			crebzf.S
			crem.S
			crx.S
			csde1.S
			ctcf.S
			cux1.S
			dmbx1.S
			dmtf1.S
			dnajc1.S
			e2f3.S
			e2f4.S
			e2f5.S
			e2f6.S
			e2f7.S
			edf1.S
			elmsan1.S
			epas1.S
			ets2.S
			etv1.S
			etv3.S
			etv6.S
			foxa1.S
			foxc1.S
			foxc2.S
			foxh1.S
			foxi2.S
			foxj3.S
			foxk2.S
			foxm1.S
			foxn2.S
			foxo3.S
			foxp1.S
			gabpa.S
			gata2.S
			gata3.S
			gata4.S
			gata5.S
			gata6.S
			gatad2a.S
			gmeb1.S
			grhl1.S
			grhl3.S
			gtf2i.S
			gtf2ird1.S
			gzf1.S
			hand2.S
			hdx.S
			hes6.1.S
			hes7.1.S
			hinfp.S
			hlf.S
			hmbox1.S
			hmg20b.S
			hmgb2.S
			hmgb3.S
			hmgxb4.S
			hnf1b.S
			homez.S
			hsf1.S
			id2.S
			id3.S
			id4.S
			ikzf4.S
			ikzf5.S
			irf2.S
			irf6.S
			irx1.S
			irx2.S
			irx3.S
			isl1.S
			jarid2.S
			junb.S
			kat7.S
			kdm5c.S
			klf15.2.S
			klf2.S
			klf6.S
			kmt2c.S
			l3mbtl3.S
			lcor.S
			lef1.S
			lhx5.S
			lin28a.S
			lin28b.S
			max.S
			maz.S
			mef2a.S
			mef2d.S
			meis2.S
			meis3.S
			mier1.S
			mier2.S
			mkx.S
			mlx.S
			mlxip.S
			msantd3.S
			msantd4.S
			msgn1.S
			msx1.S
			mta2.S
			mypop.S
			naif1.S
			ncor1.S
			ncor2.S
			nfatc3.S
			nfe2l3.S
			nfkb2.S
			nfx1.S
			not.S
			nr1i2.S
			nr2c1.S
			nr3c2.S
			nrf1.S
			pbrm1.S
			pbx3.S
			phox2a.S
			phox2b.S
			plag1.S
			pms1.S
			pou2f1.S
			pou5f3.1.S
			pou5f3.3.S
			ppara.S
			ppard.S
			prdm1.S
			prdm15.S
			rara.S
			rarg.S
			rbpj.S
			rel.S
			relb.S
			rere.S
			rfx2.S
			rlf.S
			rreb1.S
			rxrb.S
			sall4.S
			satb1.S
			six4.S
			smad1.S
			smad2.S
			smad4.2.S
			smarca5.S
			smarcc1.S
			smarcc2.S
			smarce1.S
			snai2.S
			sox11.S
			sox13.S
			sox17a.S
			sox3.S
			sox4.S
			sox9.S
			sp2.S
			sp3.S
			sp5.S
			sp5l.S
			sp8.S
			srebf1.S
			srebf2.S
			srf.S
			ssrp1.S
			stox1.S
			tbx1.S
			tbx2.S
			tbx6.S
			tcf3.S
			tcf7.S
			tcf7l1.S
			tef.S
			terf2.S
			tfam.S
			tfap2c.S
			tfdp1.S
			tfeb.S
			tgif1.S
			thap1.S
			thap7.S
			tox4.S
			tp53.S
			trhd.S
			tulp4.S
			twist1.S
			ubtf.S
			usf1.S
			usf2.S
			ventx1.1.S
			ventx1.2.S
			ventx2.1.S
			ventx2.2.S
			vezf1.S
			wiz.S
			ybx1.S
			ybx2.S
			yy1.S
			zbed4.S
			zbtb10.S
			zbtb11.S
			zbtb2.S
			zbtb26.S
			zbtb33.S
			zbtb34.S
			zbtb37.S
			zbtb47.S
			zbtb5.S
			zbtb6.S
			zbtb8b.S
			zbtb9.S
			zfp91.S
			zfpm1.S
			zhx1.S
			zhx2.S
			zhx3.S
			zic3.S
			znf131.S
			znf143.S
			znf219.S
			znf276.S
			znf281.S
			znf319.S
			znf335.S
			znf362.S
			znf367.S
			znf407.S
			znf507.S
			znf518b.S
			znf521.S
			znf526.S
			znf574.S
			znf618.S
			znf639.S
			znf646.S
			znf653.S
			znf740.S
			znf800.S
			znf821.S
			arid1a
			atf5
			gtf2i
			hmgb1
			hsf3
			kdm5a
			maz
			ovol2
			pbx3
			phox2a
			prdm12
			rfx7
			samd11
			smarca5
			snapc4
			stox2
			tbx6
			thap1
			tshz1
			zfpm1
			zhx2

## Sheet: Neur
Transcription Factor WGCNA Neural Modules
Brown	Blue	Yellow	Green	Turquoise
42Sp43.L	arid4a.L	arid2.L	arntl2.L	adnp.L
bhlhe40.L	atf3.L	atf5.L	camta2.L	adnp2.L
cdx2.L	atf6b.L	cebpa.L	cic.L	aebp2.L
crebrf.L	cebpd.L	ctcf.L	elmsan1.L	arid3a.L
ddit3.L	creb3l4.L	egr2.L	foxd4l1.1.L	arid4b.L
fezf2.L	dmrt2.L	egr4.L	foxn3.L	arid5b.L
foxa4.L	e2f1.L	ets2.L	id2.L	arnt.L
foxd3.L	e2f7.L	fos.L	id3.L	atf1.L
grhl3.L	edf1.L	fosb.L	insm1.L	atf4.L
gzf1.L	emx1.L	gmeb2.L	klf5.L	atf6.L
hoxc3.L	etv4.L	hes1.L	mxd1.L	bach1.L
irx3.L	fosl1.L	hes2.L	snai1.L	bcl11a.L
lef1.L	fosl2.L	myod1.L	tfam.L	bix1.1.L
mafb.L	foxa2.L	nr4a1.L	ventx2.1.L	bix1.2.L
nfe2l2.L	foxi1.L	olig2.L	ventx2.2.L	bnc1.L
prdm1.L	foxj1.L	ptf1a.L	zbtb5.L	carhsp1.L
rcor2.L	foxo3.L	smarcc2.L	zfx.L	cdc5l.L
sox21.L	gmeb1.L	sox4.L	zic2.L	cebpg.L
sox3.L	gpbp1.L	sox8.L	znf217.L	creb1.L
sp7.L	gpbp1l1.L	srf.L	znf219.L	creb3l2.L
sub1.L	grhl1.L	tada2a.L	atoh1.S	crem.L
tcf3.L	hes4.L	twist1.L	e2f3.S	crx.L
tgif1.L	hoxc12.L	znf384.L	elf1.S	csde1.L
tulp3.L	hsf2.L	znf652.L	elf2.S	cux1.L
zbtb12.L	ikzf2.L	znf668.L	gmeb2.S	dlx3.L
zfhx3.L	irf1.L	cdx1.S	gpbp1l1.S	dlx5.L
zfp91.L	irf2.L	cebpa.S	id3.S	dlx6.L
zhx1.L	irx2.L	ddit3.S	insm1.S	dmtf1.L
znf710.L	jun.L	fos.S	mta1.S	dnajc1.L
arid2.S	junb.L	foxd3.S	nrbf2.S	dnajc2.L
atf3.S	klf2.L	foxk2.S	prdm2.S	dnajc21.L
carhsp1.S	klf6.L	gmeb1.S	usf3.S	e2f3.L
cdc5l.S	klf9.L	gsc.S	ybx2.S	e2f4.L
creb3l4.S	lin28b.L	hand2.S	zbtb46.S	e2f5.L
foxd4l1.1.S	maff.L	hes1.S	zic2.S	e2f8.L
hoxb3.S	mga.L	hes7.2.S	znf592.S	e4f1.L
hoxb4.S	nr3c2.L	jund.S	mta1	egr1.L
hoxd13.S	patz1.L	klf5.S	stox2	elf1.L
lhx2.S	pbrm1.L	mafb.S		elf2.L
mier1.S	pitx1.L	mier3.S		elk1.L
msx2.S	pou5f3.2.L	myod1.S		elk4.L
mta2.S	prdm10.L	nkx3-1.S		eomes.L
rara.S	rax.L	nr4a1.S		epas1.L
samd11.S	rfx2.L	phox2a.S		erf.L
smad6.S	rfx5.L	rfx2.S		ets1.L
sox9.S	rfx7.L	six4.S		etv3.L
srebf1.S	smad2.L	sox8.S		etv6.L
sub1.S	smarce1.L	srf.S		figla.L
tgif1.S	sox15.L	stat1.S		foxd4l1.2.L
thap4.S	sox2.L	zhx2.S		foxh1.L
ventx3.2.S	tfap2c.L	znf652.S		foxh1.2.L
znf219.S	tfdp2.L	egr2		foxi2.L
znf653.S	thap1.L	msantd2		foxj3.L
nr1d1	ubtf.L	phox2a		foxk2.L
pou4f1	zbed4.L			foxn2.L
prdm12	zbtb17.L			foxn4.L
	zbtb33.L			foxo4.L
	zbtb44.L			foxp1.L
	zeb2.L			gabpa.L
	zic1.L			gata2.L
	znf518a.L			gatad1.L
	znf574.L			gatad2a.L
	znf653.L			gcm1.L
	zzz3.L			gli3.L
	arid4a.S			gtf2ird1.L
	atf4.S			hbp1.L
	atf5.2.S			hes7.1.L
	cebpb.S			hes7.2.L
	creb3.S			hesx1.L
	creb3l2.S			hic2.L
	crebzf.S			hif1a.L
	ctcf.S			hinfp.L
	e2f1.S			hmbox1.L
	e2f7.S			hmg20a.L
	elk4.S			hmg20b.L
	ets2.S			hmgb2.L
	fosl1.S			hmgb3.L
	fosl2.S			hmgxb3.L
	foxj1.S			homez.L
	foxn3.S			hoxd10.L
	grhl3.S			ikzf5.L
	hes6.1.S			irf5.L
	hic2.S			irf6.2.L
	hmg20a.S			irf8.L
	hmgb3.S			irf9.L
	irf1.S			irx1.L
	irf6.S			jarid2.L
	irf8.S			kat7.L
	jun.S			kdm5c.L
	junb.S			klf10.L
	kdm5b.S			klf11.L
	klf6.S			klf15.2.L
	lcor.S			klf17.L
	lhx3.S			klf4.L
	maff.S			klf8.L
	msantd3.S			lcor.L
	mybl2.S			lcorl.L
	olig4.S			lhx5.L
	pbrm1.S			lin28a.L
	pou5f3.2.S			max.L
	prdm15.S			mef2d.L
	satb1.S			meis2.L
	smad2.S			mier1.L
	snai1.S			mier2.L
	sox11.S			mier3.L
	sox21.S			mix1.L
	sox4.S			mlx.L
	tfeb.S			mnt.L
	ubtf.S			msantd3.L
	ventx2.1.S			msantd4.L
	zbtb10.S			msx1.L
	zfx.S			mta2.L
	znf507.S			mtf1.L
	znf518a.S			mxd3.L
	kdm5b			mxi1.L
	sall1			mybl2.L
				myc.L
				mynn.L
				mypop.L
				mysm1.L
				myt1.L
				ncor1.L
				nfatc3.L
				nfe2l1.L
				nfxl1.L
				nkx3-1.L
				not.L
				nr1i2.L
				nr2c1.L
				nr2f6.L
				nr6a1.L
				nrbf2.L
				nrf1.L
				otx1.L
				otx2.L
				pax3.L
				pax6.L
				pbx1.L
				pbx2.L
				pknox1.L
				pknox2.L
				pou2f1.L
				pou5f3.1.L
				pou5f3.3.L
				ppara.L
				prdm14.L
				prdm4.L
				rad54b.L
				rarg.L
				rbpj.L
				rcor1.L
				rela.L
				rest.L
				rlf.L
				rreb1.L
				rxrb.L
				rxrg.L
				sall1.L
				sall3.L
				sall4.L
				satb1.L
				six3.L
				six4.L
				smad1.L
				smad4.1.L
				smad4.2.L
				smad9.L
				smarcc1.L
				sox11.L
				sox17a.L
				sox17b.1.L
				sp1.L
				sp2.L
				sp3.L
				sp5l.L
				sp8.L
				srebf2.L
				stat2.L
				stat3.1.L
				stat3.2.L
				stox1.L
				tcf12.L
				tcf7l1.L
				terf1.L
				terf2.L
				tfap2a.L
				tfap4.L
				tfcp2.L
				tfdp1.L
				tgif2.L
				thap7.L
				tox3.L
				tox4.L
				tp53.L
				trhd.L
				tulp4.L
				usf2.L
				usf3.L
				vegt.L
				ventx1.1.L
				vezf1.L
				wdhd1.L
				wiz.L
				xbp1.L
				ybx1.L
				ybx2.L
				yy1.L
				zbtb10.L
				zbtb2.L
				zbtb21.L
				zbtb24.L
				zbtb34.L
				zbtb39.L
				zbtb40.L
				zbtb41.L
				zbtb47.L
				zbtb49.L
				zbtb8a.1.L
				zbtb8b.L
				zfat.L
				zfp64.L
				zhx3.L
				zic3.L
				zic4.L
				znf131.L
				znf142.L
				znf143.L
				znf236.L
				znf277.L
				znf281.L
				znf319.L
				znf335.L
				znf407.L
				znf410.L
				znf423.L
				znf507.L
				znf516.L
				znf518b.L
				znf526.L
				znf592.L
				znf639.L
				znf646.L
				znf711.L
				znf740.L
				znf770.L
				znf800.L
				zxdc.L
				adnp.S
				adnp2.S
				aebp2.S
				arid3a.S
				arid3b.S
				arid4b.S
				arnt.S
				arntl.S
				atf1.S
				bach1.S
				bcl6.S
				cebpd.S
				cebpg.S
				champ1.S
				creb1.S
				crebrf.S
				crx.S
				csde1.S
				cux1.S
				dlx3.S
				dlx5.S
				dlx6.S
				dmtf1.S
				dnajc1.S
				dnajc2.S
				e2f4.S
				e2f5.S
				e2f6.S
				e4f1.S
				edf1.S
				egr1.S
				elmsan1.S
				eomes.S
				epas1.S
				erf.S
				ets1.S
				etv1.S
				etv3.S
				etv6.S
				fezf2.S
				foxh1.S
				foxi2.S
				foxj3.S
				foxm1.S
				foxn2.S
				foxo3.S
				foxp1.S
				foxp4.S
				gabpa.S
				gata2.S
				gatad2a.S
				grhl1.S
				gtf2i.S
				gtf2ird1.S
				gzf1.S
				hdx.S
				hes4.S
				hes7.1.S
				hesx1.S
				hinfp.S
				hlf.S
				hmbox1.S
				hmg20b.S
				hmgb2.S
				hmgxb4.S
				hoxc12.S
				hsf1.S
				id2.S
				ikzf4.S
				irf2.S
				irf6.2.S
				irx1.S
				irx2.S
				irx3.S
				jarid2.S
				kat7.S
				kdm5c.S
				klf10.S
				klf11.S
				klf15.2.S
				klf2.S
				l3mbtl3.S
				lhx5.S
				lin28a.S
				lin28b.S
				max.S
				maz.S
				mef2d.S
				meis3.S
				mier2.S
				mlxip.S
				msantd4.S
				mxd1.S
				mxd3.S
				mybl1.S
				mypop.S
				myt1.S
				naif1.S
				ncor1.S
				nfatc2.S
				nfatc3.S
				nfe2l1.S
				nfx1.S
				nfya.S
				not.S
				nr1i2.S
				nr2c1.S
				nr3c2.S
				nr6a1.S
				nrf1.S
				otx1.S
				otx2.S
				pax3.S
				pbx2.S
				pbx3.S
				plag1.S
				pms1.S
				pou2f1.S
				pou5f3.1.S
				pou5f3.3.S
				ppara.S
				prdm1.S
				prdm10.S
				prdm14.S
				rarg.S
				rax.S
				rbpj.S
				rel.S
				rere.S
				rlf.S
				rreb1.S
				rxrb.S
				sall3.S
				sall4.S
				six3.S
				smad1.S
				smad4.2.S
				smarca5.S
				smarcc1.S
				smarcc2.S
				smarce1.S
				sox13.S
				sox17b.1.S
				sox3.S
				sox7.S
				sp1.S
				sp2.S
				sp3.S
				sp5l.S
				sp7.S
				sp8.S
				srebf2.S
				ssrp1.S
				stox1.S
				tcf12.S
				tcf3.S
				tcf7.S
				tcf7l1.S
				tef.S
				terf2.S
				tfam.S
				tfap2a.S
				tfap2c.S
				tfap4.S
				tfdp1.S
				tfdp2.S
				tgif2.S
				thap1.S
				thap2.S
				thap7.S
				tox4.S
				tp53.S
				trhd.S
				ubp1.S
				usf1.S
				vegt.S
				ventx1.2.S
				ventx2.2.S
				vezf1.S
				wiz.S
				xbp1.S
				ybx1.S
				yy1.S
				zbed4.S
				zbtb11.S
				zbtb2.S
				zbtb26.S
				zbtb33.S
				zbtb34.S
				zbtb37.S
				zbtb45.S
				zbtb47.S
				zbtb48.S
				zbtb5.S
				zbtb6.S
				zbtb8a.1.S
				zbtb8b.S
				zeb2.S
				zfp91.S
				zfpm1.S
				zhx1.S
				zhx3.S
				zic1.S
				zic3.S
				zic4.S
				znf131.S
				znf143.S
				znf276.S
				znf281.S
				znf319.S
				znf335.S
				znf367.S
				znf407.S
				znf516.S
				znf518b.S
				znf521.S
				znf526.S
				znf574.S
				znf618.S
				znf639.S
				znf646.S
				znf668.S
				znf740.S
				znf800.S
				znf821.S
				zzz3.S
				arid1a
				atf5
				cic
				gtf2i
				hmgb1
				hsf3
				kdm5a
				maz
				ovol2
				rere
				rfx7
				runx1
				smarca5
				snapc4
				thap1
				tshz1
				zhx2

## Sheet: Activin-Responders
Transcription Factor WGCNA Module Overlap
Endo Blue	Endo Blue +Meso Green	Endo Blue + Meso Green + Neural Turquoise	Endo Blue +Neural Turquoise
Gsc	Bix1.3	Bix1.1	Gata2
hHex	Eomes	Bix1.2	Otx2
	Foxa4	Sox17a	Smad7
Pitx2	Lhx1	Sox17b
	Mixer	Vegt
	Osr2	Mix1
	Snai1

## Sheet: BMP-Responders
Transcription Factor WGCNA Module Overlap
Meso Turquoise	Meso Turquose Epi Brown	Meso Turq-Epi Br _Neur Turq	Meso Turq-Epi Blue	Meso Turq-Epi Blue_Neur Turq	MesoTurq-Epi Turq	Meso Turq-Neur Turq	Meso Turq-EpiTurq-NeurTurq
Gsc	ventx2.1	Bix1.1	Snai1	zic1	Zic2		Gata2
Evx1		Ventx1.2	Gata6		gata4		Msx1
			Smad6		Gata5		ventx1.1
					Smad2		Smad1
					Smad7		smad4.1
					tfap2c		smad4.2
							sox3
							myc
