# Supplementary material for: Quantitative analysis of transcriptome dynamics provides novel insights into developmental state transitions
Source: BMC Genomics. 2022 Oct 23;23:723. doi: 10.1186/s12864-022-08953-3 (PMC9588240; doi:10.1186/s12864-022-08953-3)
Supplement: Supplementary file 14 — Additional file 14. Supplemental Table 5. List of Genes for all Overlapping Temporal DESeq Groups, corresponding with supplemental figure 3. [file 12864_2022_8953_MOESM14_ESM.xlsx]

## Sheet: St9-10_Increase
List of Genes for all Overlapping Temporal DESeq Groups, corresponding with supplemental figure 3
All_Lineages	Epi-Meso-Neur	Epi-Meso-Endo	Epi-Neur-Endo	Meso-Neur-Endo	Epi-Neur	Epi-Meso	Epi-Endo	Neur-Meso	Neur-Endo	Meso-Endo	Epi	Neur	Endo	Meso
u2af2.S	eif5a.L	spint2.L	hnrnpul2.L	hnrnpab.L	lmnb1.L	fscn1.L	sarnp.S	myef2.L	epcam.S	h3-3b	ogdh.L	cpsf3.L	nap1l1.S	cog5.L
sra1.L	hnrnph3.L	arl13b.L	hnrnpab.S	ddx39	smc3.S	sat1.S	sec23b.S	h1fx.S	h2afz.L	hmgn1.L	zc3h13.S	fubp1.S	MGC53795	golph3.L
tpt1.L	mcm6.2.L	fam110c.L	hnrnpl.L	srsf1.L	cmas.L	ppia.L	cd63.L	loc100494818.L	magoh.L	upk1b	akt1s1.S	smarcd1.S	odc1.S	npm1.L
prmt1.L	rhob.S	hmgb2.S	set.S	hmgb3.S	phf5a.S	dido1.L	serf2	hnrnpdl.L	nucks1.S	hmgb3.L	tomm40.S	smc1a.S	slc25a5.L	eif4a3.S
hmgn2.L	hspa8.S	arl5c.L	ilf2.L	pvrl2.L	rnps1.S	cwc25.L	LOC108701478	prpf39.1.L	myl12b.S	zc3h10.L	usp14.S	tpp2.L	blzf1.S	slc16a3.L
hmg-17	hexim1.L	nsep1	ctbp2.S	prmt1.S	xnf7.S	ubb.L	snrpb.L	mcm6.2.S	snrnp70.L	rasl11b.L	tfg.L	ilf3.S	rbm14.S	hnrnpk.S
srsf3.S	h2ac11	hmgn1.S	hist2h3d.L	bsg.L	cpsf6.S	elovl7.L	ssbp3.L	LOC100191026	anp32e.L	spry1.S	LOC108709949	magoh.S	ncbp3.L	dgat1.L
anp32c.S	mcl1.L	ca14.L	hnrnpc.L	hnrnpa2b1.L	alyref.S	MGC83421	fam32a.L	btbd6.L	luc7l3.L	mcl1.S	srek1ip1.L	wdr45b.S	znf326.S	tsc22d1.L
MGC52578	hist1h2bj.L	srsf2.L	arf4.S	khdrbs1.S	rab10.L	utp15.S	pcbp3.L	h3c7	srsf1.S	trim25	clta.L	sf3b3.S	ddx5.L	rabgap1l.S
tra2a.S	h2afx.L	1a11.L	alyref.L	hnrnpu.S	u2af1.L	xvent-2b	anxa7.L	LOC108703765	myef2.S	rnf222.S	MGC80893	rab1a.L	h3f3b.S	LOC108702842
hnrnpk.L	ptma.L	Xelaev18039183m	glul.S	hnrnpa1	srsf4.L	ubc.L	elob	LOC108704304	epcam.L	sapcd2	ubr4	txnrd3.L	ncl.S	tdgf1.3.L
cirbp.L	irs4.S	pou5f3.2.L	hdlbp.L	cirbp.S	rbm8a.L	mat2a.S	gtpbp4.L	srsf10.L	itgb1.S	LOC108719569	snw1.L	actg1.S	oaz1.S	hras.L
tra2a.L	gfpt1.S	kirrel2.S	wee1.S	rbmx.L	sf3b2.S	LOC108695519	fus.L	fbxo5.L	ptbp1.S	spry1.L	cwc15.S	psmc5	srsf9.L	ND2
prpf39.1.S	mlec.S	LOC108698217	nuak2.S	chst7.S	smarcc1.L	tgif2.S	tceb2.L	hexim1.S	u2af1.S	LOC100036828	drap1.L	ppp1ca.L	carnmt1	luc7l2.S
h3f3b.L	LOC108717645	LOC108719506	ephb3.L	hnrnpa1.S	sec14l1.L	prss8	srsf2.S	ier5l.L	ubtf.L	LOC108715172	eif3a	sar1a	c20orf24.L	upk3a.L
ets2.L	esco2	arl4c.L	cgn.L	tmem79.S	ptma.S	epha2.L	hnrnpa0.L	LOC108715080	rap2b.S	isg20l2.L	ddx46.L	selt.S	eif2s2.L	nfe2l1.S
hspa8.L	ins	xk81a1.L	srrt.L	gfpt1.L	znf638.L	LOC108719529	capzb.L	egr4.L	ptbp1.L	metrnl.S	ywhaq.L	lmnb1.S	tra2b.L	LOC108718446
ralb	d17h6s53e	muc2	sfpq.S	fam43a.S	unkl.L	msto1.L	ctc1	Xelaev18000460m	farp2.S	ventx2.1.S	thrap3.L	lrrc1.S	txnl4a.S	rpl26.L
coq10b.L	asna1.L	MGC79993	pcf11.S	skil.S	ift172.L	napb	aim1.S	LOC108711832	Xelaev18024228m	ficd.S	hmgb1	pabpc1.S	bsg.S	midn.S
slc7a3.L	sall3.L	wap	hnrnpu	slc25a17.L	wdr43.L	rgcc.L	nfkbia.S	rbm5.S	LOC108700571	sp5l.L	dhx15.S	eif4a1.L	snu13.S	LOC108719063
sgk1.S	emc4.L	rbms2.S	lrig3.S	sf3b5.S	znf605.S	fth1.L	hhip.S	pcdha13.S	acvr1b.L	nudt22.L	acin1.S	hdlbp.S	prcp.S	phf13.S
atf4.L	LOC108695577	neurl1b.L	cdc14b.L	sertad3.L	pabpn1.S	LOC101734999.S	prph.S	LOC108707159	relt.L	stox1.S	dirc2.S	cdc42.L	sec61a1.L	LOC108704302
cdk9.L	cldn4.S	tiparp.S	calr.L	Xelaev18022211m	lamc1.S	sfrp2.S	dsel.S	LOC108716428	ier2.L	fhdc1.L	dnajc7.L	upk1a.L	tpm3.L	tpd52l2.S
e2f7.S	chkb.S	pdgfb.L	vezf1.S	hsp70.L	ppp1r10.L	foxd4l1.2.L	dgki	Xelaev18028552m	LOC494849	bmp7.2.L	exosc1.L	anp32c.L	crkl.L	fgfr4.S
sfpq.L	LOC108714950	LOC108715416	rbm14.L	rbmx.S	rbm4b.S	LOC108715136	ankrd24.L	fos.S	akap12.S	LOC108696874	eif3m.S	tomm20.L	cdh3.L	prdm9.L
srsf7.S	tp53inp1.L	slc7a5.S	angpt4.S	zswim4.L	phc1.S	kit.L	fam131b.S	fos.L	fam110c.S	rnd1.L	psmd13.S	smarcc2.L	srsf3	rab11fip4l.L
eef1a1o.S	rhob.L	sh2d3c.S	rab40c.L	cldn4.L	ppp1cb.L	LOC108715703	pou3f1.L	chst2.L	ccnf.L	LOC108704627	dcaf15.S	ctbp2l.L	snrpb2.L	tuba4b.S
notch1.L	map3k1.S	akap2.L	lrig3.L	zc3h10.S	actb.S	Xelaev18005230m	crx.L	tfap2c.L	znf653.L	lpar2.S	eif2s1.L	ilf3.L	xnf7.L	fut1.S
hdgf.L	LOC108718087	LOC108703380	tsc1.S	midn.L	larp4b.S	tmem158.S	Xelaev18024628m	Xelaev18041975m	zswim4.S	Xelaev18030357m	casc3.L	drap1.S	tmed5.S	post7p.L
LOC105945479	evpl.L	prrt4	gadd45g.L	zbtb10.S	rpl23.S	LOC108719507	gata5.S	cldn23	klf10.S	vegt.S	nelfcd.L	hnrnpul2.S	dnajc7.S	ccno.S
LOC108701852	hist1h3g.L	sox8.L	nuak1	cdknx.L	MGC115598	zic3.L	ednra.S	ablim1	msx1.L	emp2.L	cstf2.L	tmem147.S	cldn7.L	LOC108719643
zmcm3.L	LOC108716538	cerk	awat1.L	slc35a2.S	h4c15	frem2	prickle3	lhx5.S	fzd8.S	LOC100158389	gtf2f1.L	hnrnph1.S	cldn6.2.L	znf750.L
znf91	mypop.S	LOC108698461	ets2.S	znf585b.S	ylpm1.L	plk2.L	arhgef3.2.S	abcb1	Xelaev18018970m	1700037h04rik	e2f3.S	fzd7.L	plrg1.S	cyp26a1.S
btg1.L	fam46a.L	Xelaev18001619m	rbm12.L	xbp1.L	tubb4b.L	slc34a2.L	lrriq3.S	Xelaev18025740m	lhx1.L	LOC108701212	dync1i2.S	elavl1.L	ywhab.L	znf750.S
eef1a1.L	LOC108704294	chrd.L	prkcd	brd2.S	unknown.S	klf17.L	Xelaev18013398m	LOC108719577	hap1.S	ccne2.S	nrbp1.L	nop56.L	cox5b.1.L	snta1.S
Xelaev18023727m	LOC108695579	efemp2.L	LOC108718254	g2e3.L	hp1bp3.L	nlrc4.L	glipr2.S	Xelaev18003044m	Xelaev18002950m	Xelaev18001443m	f11r.L	LOC100505446	srsf6.S	dhrs3.S
LOC108702825	LOC108716539	Xelaev18043700m	LOC100495010.S	xbp1.S	Xelaev18042112m	tmem163.S	LOC108698417	hal.1.L	LOC108716731	Xelaev18001896m	faf1.L	LOC108697862	ctf1	LOC100301958
hes4.L	rhebl1.L	mid1ip1.L	fgd1.S	LOC108719518	cpsf1	ventx1.2.S	chrd.2.L	LOC108704293	pcdh8.L	LOC108707041	loc100145527.S	dusp11.2.S	hnrnpdl.S	sbk1l.S
sowahc.L	LOC100191024	shbg	Xelaev18003796m	rabgap1l.L	ckap5.L	Xelaev18003060m	map3k19.L	cmtm8.L	sema4a.S	fhl3.L	cbs.L	leng8.S	gnl3.L	xarp.L
rab26.L	LOC108697295	cnr2.S	hhip.L	mplkip	ankrd50.L	cib3	Xelaev18017453m	Xelaev18017777m	LOC108717663	has2.L	srrm1.L	stag2.L	snu13.L	psmg1.L
fam109b.L	ago2	cacng4.L	c2cd2.S	LOC108719510	dusp8.S	cbln1	areg.S	tat.S	Xelaev18006002m	LOC108706589	dnaja2.L	upk1b.S	prcc.L	bambi.L
rnd1.S	vav2.L	wnt7a	parp2.L	e2f7.L	trim36.S	Xelaev18034047m	cep19.L	c15orf39.S	shox2.S	LOC108698137	sumo3	actg1.L	h2afz.S	gas1.L
LOC108709818	ras-dva1.L	apcdd1.S	galnt7.S	LOC108707322	slc25a34.L	prph.L	col4a1.L	LOC108712518	LOC108716734	dlx5.S	srsf4	dynll1.S	ybx1.S	nrarp.S
Xelaev18003910m	znf101	c22orf15.L	ggt1.L	rdh10.L	actb.L	nkain1.L	LOC100037118	LOC108700281	gli3.L	foxh1.2.L	ralb.S	hmgn3.S	mex3b.L	post.L
rnf135.L	gadd45g.S	gli1.L	prkx.L	ccne2.L	pars2.L	tll1-like.1.L	LOC108708391	LOC108703541	ifit5	LOC108698374	gramd1c.L	hif-1a	krt18.L	usp21.S
LOC108698884	hist2h2ab.L	c17orf58.L	scube2.S	pvrl1-like.2.L	faxc.L	arl4c.S	st6gal1.L	LOC100192369	foxa1.S	tfap2a.L	ewsr1.L	lratd2	sec61g.L	LOC108717955
sgk1.L	loxl1.L	atp1a3.L	Xelaev18036449m	LOC108711841	rnf38.L	socs1.L	snai2.L	apela.S	pear1.L	LOC108714321	eif3h.L	pabpn1.L	nedd8.S	bmp4.S
crebzf.S	prom1.L	fosl1.L	robo3.S	slc25a29.L	kiaa0232.L	ventx1.2.L	fgd1	aldh1l1.L	kiaa2012	rarg.S	cycs.S	luc7l3.S	rtn4.L	klf2.S
rhebl1.S	zfp36l2.L	tph1.S	slc30a8.L	LOC108698488	hist1h4d.L	rassf6.S	itga4.S	LOC108696788	Xelaev18047274m	rassf7.L	fkbp1a.S	LOC108704307	plpp2.L	LOC108708226
pou5f3.2.S	timp-1.L	loc100496061.L	LOC108695812	jag1.L	lrp6	scin.L	fli1b.L	krt.S	hoxd9.L	LOC108702579	erh.L	atg4d.S	loc728026.L	nfkbia.L
dusp5.S	slc35d2	npy2r-like.1.L	Xelaev18012750m	cfap52.L	hic2.S	apold1.L	trpm8b.L	slc16a3	LOC108717287	MGC76328.L	gramd1c.S	sertad3.S	frmd4b.L	post10.L
pgbd4	socs4.L	f3.S	spred1.L	emp2.S	abcb9.L	card9.L	cfb.L	bicd1		cldn6.S	rtfdc1.L	dck.2.L	iscu.S	Xelaev18047576m
LOC108706318	Xelaev18023726m	chgb.L	Xelaev18004563m	LOC108714507	lrp10.S	hpgd.S	pnck.L	vgll4l.L		lpar2.L	snrpb.S	kbtbd7.L	hs3st1.L	Xelaev18006086m
sall1.L	syn1.L	tmprss9.S	loc108648340.L	muc5b	khdc4	xepsin.L		myt1.S		LOC108715921	edf1.L	irs4.L	marcksl1.L	pced1a.S
atg16l1.S	LOC108698739		LOC108702458	loc108715171.S	hspbp1.L	rgl2		fam198b.L		efnb2.S	tmem214.L	eif4g1.L	lrwd1.L	dhrs3.L
LOC108711538	LOC108703754		zeb2.L	ptafr.L	mfsd11.L	dmrt2.L		htr1a.S		LOC108701134	ube2l3.L	setd2.S	hnrnpa0.S	eef1b2
LOC108719085	pdk4.L		sst.S	Xelaev18025314m	ppp1r10.S	pax6.L		htra1.S		ventx2.1.L	fam168a.L	kif11.S	mex3c.L	tlr2
rbl1.S	LOC108701822		LOC108706543	gprc5c.L	lhx5.L	plcd3.L		meis3.S		ccdc181.S	psmb6.L	ticrr.L	ubald2-b	nrarp
xicl	LOC108699863		LOC108715896	eif4a2.L	ago2.L	crabp2.L		Xetrov90020324m.L		LOC108719494	bcas2.L	plk4.L	MGC81970	LOC108719479
rbl1.L	gas2l1.L		eps8l2.S	LOC108702848	LOC100127323	tnfsf10.S		Xelaev18012386m		wnt11b.L	rnf113a.S	dhx15.L	fbxo34.L	rnf144b.S
pdk4.S	znf703.S		fbn1.S	Xelaev18037263m	ldlr.L	pax3.S		LOC108716791		smad7.L	nudc.L	tjp2	b3gnt2.S	LOC108705484
tmem127.S	LOC108700186		map3k14.S	hpgd.L	LOC108713945	vamp5.L		LOC108713828		lefty.S	snd1.L	slc1a5.S	commd3.S	rbm47.L
litaf.L	cdc25b.S		neurod2.L	itpka	rfng.L	Xetrov90014299m.L		LOC108697537		st6galnac2.S	usp25.L	ncstn.L	chrac1.S	pgbd5.L
junb.S	pcdh19		myoc.L	gas2l1.S	ppt1.S	apoc1-like.L		sds.L		fam212a.L	snrpd3.L	larp4b.L	marcksl1.S	LOC108700879
Xelaev18005946m	cbarp.L		LOC108713742	itpr3	lrp10.L	snap25		tmem265.L		LOC108705281	txnl1.S	ncstn.S	dnph1	LOC108699910
LOC108696061	Xelaev18029313m		pcdh8l.S	gs17.S	sall4.L	LOC108698355		zfp36.S		chd3	eif3c.L	sp1.L	pofut2	hes3.1.L
xetrov90011961m.S	pnpla2.L		trarg1.L	LOC108704568	btg2.S	p2ry2.S		LOC108710290		LOC108707237	tpd52l2.L	slc27a3.L	LOC108703769	Xelaev18038135m
zfp36l2.S	plekhn1.S			pou5f3.1.S	mab21l1.S			eppk1.L		nedd9.S	rab1a.S	gatad2a.L	imp4.S	post5.S
Xelaev18000217m	stat3.2.L			elf1.L	cebpd.S			Xelaev18004347m		has1.S	pdcd6ip.L	sp1.S	lpar4.L	fhit.L
srsf7.L	fzd2.S			ckap4.S	zfp36.L			LOC101733888.L		npdc1.1.S	inip.S	nuak2.L	tmcc1.L	LOC108716547
fam122b.L	sds.S			Xelaev18000325m	LOC108718942			Xelaev18001689m		Xelaev18037842m	apex1.L	grx5	tuba4b.L	LOC108696255
tubb2b.L	kcna3.S			fth1.S	ep300.S			Xelaev18040899m		nxpe3l.6.L	znf207.S	rbm5.L	cxcr4.S	chst9
prickle1.L	LOC108709387			efna4.L	ep300.L			Xelaev18003524m		crocc.L	cs.S	wdr83os.L	csrnp1.L	LOC108715137
hist2h2ab.S	LOC108719537			Xelaev18008693m	znf703.L			mfap2.L		Xetrov90005150m.S	uba1.S	myc.L	prickle1.S	gprc5c.S
slc2a1.S	LOC108695509			LOC108704127	LOC108710017			Xelaev18022785m		nedd9.L	eif2s3.S	purb.L	best2.L	cluh
grhl3.S	cks1b.L			mmp14.L	gpr143.L			post3.S		LOC108695556	COX3	unkl.S	LOC108705724	fmc1.L
Xelaev18014048m	atf3.L			p2ry2.L	LOC108708228			fcn2		Xelaev18008577m	tmed2.L	plekhg7.S	plk3.S	LOC108711412
Xelaev18003021m	azin2.S			ptgs2.S	sptbn5.L			LOC108709519		krt5.7.L	pfdn2.S	LOC108710814	cidea.L	mapre2.S
LOC108717642	Xelaev18012294m			LOC108699475	irx2.L			pnliprp1		lrrc56.L	rbm22.S	ufc1.S	ptmap12.S	lypd6.L
Xelaev18021693m	ptch2.L			LOC108717895	Xelaev18026162m					tuba1cl.2.S	kras.S	mob2.1.L	ier5.L	slc35f6
LOC108695506	ras-dva1.S			caprin2.S	dennd3.L					tbkbp1.L	atp6v1g1	krasl.S	rhpn2.L	LOC108698216
plekhg3.L	LOC108705810			LOC108714970	znf462.S					atg16l1.L	ube2e3.L	znf740.L	stox1.L	LOC108698396
ttbk1.S	Xelaev18000128m			Xelaev18035105m	LOC108704423					Xelaev18044839m	psmc4.L	dnajb1.L	lpar6.L	Xelaev18001309m
cyb561.L	klf5.L			Xelaev18014773m	socs1.S					dll1.S	stau1.L	h2afj.S	ier5l.S	ackr3.S
sox2.L	ccnd1.S			mars2	klf9.L					rhbdl3	myh10.S	ugcg.S	trim7.S	pnhd.L
LOC108695513	pnhd.S			Xelaev18035319m	Xelaev18011097m					MGC53707	smarce1.L	lbr.S	loc100495271.S	znf581.S
alcam.L	sall3.S			cnn1.S	mn1.L					apln.L	sf3a1.L	znf106.L	spry2.S	slc2a2.L
LOC108709654	ptch2.S			upk2.S	fblim1.L					fsbp-like.L	jup.L	c6orf62.S	Xetrov90004873m.L	LOC108719789
kirrel2.L	LOC108716723			LOC108698113	pabpc4.L					Xelaev18017221m	psmd1.S	dusp6.L	fzd6.S	id3.L
junb.L	epn1.S			upk3b.L	myo9a					gs17.L	tpm3.S	e2f3.L	arntl2.S	LOC108715808
zswim5	fosl2.S			LOC108709649	prnp.S					stx19.L	ept1.L	LOC495489	grpel2.L	MGC115235
hnrnpr.L	polm.L			trpv6	lrrn1.S					LOC108711622	wasf2.L	rfx2.L	mex3b.S	styk1
Xelaev18032628m	vangl1.L			usp43	Xelaev18040126m					aplnr.S	sec16a.L	gsk3a.S	dusp5.L	epn3.L
pcdha13.L	hao2.L			LOC108709430	was.S					LOC108701721	hdgf.S	rbm15.S	etaa1.S	loc100487022.L
pcdh7.S	wfdc2.L			sall1	six1.L					fgf8.L	ppp1ca	tm9sf3.S	plxna4	xetrov90011961m.L
smad4.1.L	irf1.L			hunk.S	lgr5.S					krt5.7.S	eftud2.S	tomm70a.S	ubald2.L	hes3.1.S
akap12.L	trim67.S			pou5f3.1.L	LOC108713946					hes7.2.S	uap1l1.L	LOC108698063	aagab.L	LOC108711502
sdc4.L	scnn1a.L			Xelaev18029353m	LOC108710827					creb3l4.S	sap18.S	ier2.S	gpaa1.L	prelid1.L
wnt5b.L	sema3f.S			znf268.L	LOC108700904					c3ar1.L	sf3a2.L	ctps1.S	gadd45a.L	sec14l3.L
top2b.L	ptprj			LOC108702643	LOC108701523					bix1.2.L	ppm1g.S	timm17a.S	c1orf198	LOC108697345
LOC108698564	hsp90aa1.1.L			atp1b2	cd163					ventx2.2.L	gripap1.S	e2f8.L	lratd1	dnajb4.L
sh2d3c.L	wasf3			Xelaev18038470m	nat8l.L					plekhg5.S	arf4	pop7.S	not.L	cyfip2
plekhn1.L	nox1			gnb3.L	Xelaev18024603m					ptgs2.L	ociad2.L	aurkb.L	rap2b.L	adap1.L
LOC108719547	LOC108711579			cdon.L	col11a2p1.S					stard13.S	ube2m.S	cox18.L	Xetrov90024734m.S	fam189b.L
LOC108715368	Xelaev18022784m			Xelaev18026939m	Xetrov90004924m.L					Xelaev18042923m	ubr4.S	sox11.S	muc22	tmem229a.L
slc16a12.S	rpe65.S			LOC108705899	foxb1.L					grhl3.L	gtf2e1.L	b4galt5.S	tmcc1.S	Xelaev18038969m
celsr1	dhh.S			slc38a2.L	LOC108703132					fam212a.S	h3f3c.L	cpne3.L	LOC108716071	Xelaev18027991m
nradd.L	ccnd1.L			mfap2.S	ltk					fgf8.S	krtcap3.L	LOC108719535	Xelaev18001472m	LOC108718070
wee2a	dmrt2.S			trpm4	krt18					LOC108695546	crnkl1.S	LOC108720027	grem1.L	rsad2.L
tfcp2l1.L	Xelaev18015096m			ist1	apold1.S					has-rs.S	ewsr1.S	m6pr.L	phospho1.S	rfx4.L
fam193a.L	sst.2			kctd15.L	dmrt3.S					stx19.S	anp32a.L	hspa2.L	plcl2	ag1.L
znf451	foxi4.1.S			usp43.L	olfm4.L					gsc.S	cyfip1.L	LOC108696875	stx8.L	nlgn3.L
lgals3.S	cd99l2.S			Xelaev18003957m	slc16a9.L					prdm1.L	rprd1a.S	bmi1.L	foxi4.2.S	LOC108719633
LOC108719533	nedd4l			LOC108696320	Xelaev18012882m					eomes.L	qki.S	arrdc3.S	Xelaev18038858m	LOC108706886
LOC108700779	LOC108699553			Xelaev18003895m	rnf223.L					smad7.S	rpl18.S	sox9.S	LOC108718648	msx2.S
fgfr2.L	foxi4.1.L			fgfr2.S	Xelaev18012881m					flrt3.S	eif3m.L	mpzl1.L	MGC76328.S	id3.S
LOC108698487	fer1l4			cdh1.S	fam120b.S					rbm47.S	chtop.L	tuba3c.S	t2.S	ikbkg.S
hist1h1t	c9.L			Xetrov90026452m.S	MGC82544					Xetrov90015528m.L	rnf10.S	stk38l.L	kif5c.S	tuba1a.S
ervfrd-1	LOC108696785			lin28a.S	fam124b.L					cnn1.L	smarcd2.L	mief2.L	pmm2.L	sspo
cyp27a1	dennd2a.L			Xelaev18001991m	pcdhga2					hunk.L	eif1b	LOC108703763	hes7.2.L	Xelaev18016063m
tmpo	slc26a4.S			LOC108711244	sucnr1					clcf1.L	rpl13.S	LOC108715301	golm1.L	bmp3.S
prdm15.S	Xelaev18034532m			kiaa1324l.S	Xelaev18002905m					lefty.L	mta2.L	LOC108705274	Xelaev18030476m	ackr3.L
gfod1	rflcii.L			znf608	pcolce.L					Xelaev18014049m	psma7.L	adrb2.S	LOC108704231	LOC108701168
phldb3.S	kbtbd11.L			trim29.L	Xelaev18032989m					aplnr.L	ube2e3.S	mlec.L	lzts1.S	Xelaev18004205m
LOC108709393	cdx1.S			nynrin						glis2.L	pcbp2.L	LOC108705671	nxpe4.S	ppp1r27
hap1.L	elavl3			LOC108716397						lrrn1.L	qtrtd1.L	arrdc3.L	ptpro.L	LOC108702918
zswim5.S	pts.S			elovl3.L						nptx2.S	pno1.L	cebpd.L	rasl11b.S	ar.L
tead4.S	gpr65.S			kcnj15.L						Xelaev18037271m	MGC84691	LOC108705687	LOC108701311	hesx1.L
Xelaev18005310m	Xelaev18036730m			loc108703073.S						msx1.S	COX2	klf11.L	kcnq1	Xelaev18011395m
proser1.S				kiaa1324l.L						arg1.L	h3-5.L	gpr4.S	fam171a2.L	efnb3
LOC108703375										fam83b.S	nop16.L	lrig2.L	tmem178b	LOC108711532
LOC108717924										eomes.S	anp32e.S	prrt1.L	LOC108704394	LOC108718449
txnip.L										Xelaev18026940m	cttn	cdk1.S	rarg.L	LOC108708413
kiaa0232.S										Xelaev18002446m	gng5.S	sox4.S	sp5l.S	adap2.L
sh3bp4.L										prss36.L	ube2d4.L	otud1.L	fam84b.S	gpr34
mig30.L										chrd	rbm8a.S	neurog2.L	ifnlr1	olig4.S
Xelaev18022168m										ccng1.L	snrpc.S	gtf3c3.S	dlx2.S	LOC108716739
efnb2.L										mixer.L	rpl18.L	egln3.L	slc39a8.L	LOC108701666
pygm.S										loc100494211.S	ranbp1.S	MGC80567	mgst2.L	LOC100496293.L
top2b.S										gata2.S	cpsf6.L	ing4.L	st3gal5.S	fcn1
mxi1.L										LOC108714958	sap18.L	notch3.L	tacc2.L	rnf225
pcdh7.L										LOC108705022	pelp1.L	stard10.L	tfap2e.S	Xelaev18039704m
LOC108699904										nxpe2p1	psmc5.L	slc18a2	cfap58	Xelaev18036472m
syt10										LOC108702448	rps20.S	LOC108706094	cxcr4.L	LOC108706865
akap2.S										Xelaev18035393m	asun.S	LOC733379	LOC108710651	Xelaev18029191m
cldn5.S										Xelaev18005943m	hmgn3.L	terc.L	ubp1.S	slc26a6
Xelaev18009885m										bix1.3.S	rps8.S	gpr161	Xelaev18003995m	apela
socs3-like.1.L										tnfsf10l.L	adar.S	LOC108718018	steap3.L	ventx3.2.S
LOC105945479.S										rgs2.L	cherp.L	fbxl20.S	rasgrf1	ptger4.L
traf4.S										loc100497729.L	fxyd3	LOC108705992	LOC108718647	clic3.L
pkn1.L										gatm.L	bop1.L	asb2.S	Xelaev18041871m	vwc2l.2.L
Xelaev18038498m										dlx3.S	rps13.S	lsm14b.L	Xelaev18029885m	tbx22.S
nfkbiz										flrt3.L	nelfb.L	Xelaev18007686m	ces5a	uts2r
Xelaev18022009m										bix1.3.L	plcd1.S	mab21l2.L	vgll4l.S	hes3.S
ahnak.S										LOC108711414	hsp90ab1.S	sox1.S	adam33.L	prdm1.S
dlc1.L										doc2a.S	caprin1.L	LOC108705674	slit1.S	ddx54
rbms2.L										LOC100492708	ubqln4.L	MGC68910	itih3	efs.L
phldb3.L										loc495835.L	carm1.L	LOC108698759	spdef.S	LOC108709568
acy3.L										krt12.S	sec61a1.S	ccnb3.S	hamp	gprc5b.L
gprc5cl1.L										Xelaev18017809m	rps29.S	MGC82975	not.S	Xelaev18007952m
cd99l2.L										Xelaev18001971m	spint2.S	fbxl14.L	btg-x	syn1.S
wnt5b.S										foxa4.S	hnrnpll	LOC108705792	six3.S	msx2.L
LOC108695501										nxpe3l.2.L	rpl31.L	LOC108703833	spns2.L	LOC108706751
LOC108712218										Xelaev18038471m	map3k15.L	hist1h2ad.1	numbl.L	krt.L
LOC108696832										Xelaev18045196m	bag6.L	pjvk.S	fat4.L	LOC108708517
tsc22d3.L										fam26e.S	ctr9.L	klf10.L	LOC108711796	plxdc1
LOC100489607.1										dlx3.L	smarce1.S	hes1.S	rnf152.L	Xelaev18023827m
hs3st3a1.L										Xelaev18013483m	nop10.S	mypop	phox2a	epas1.S
ngfr.S										szl.L	snrnp200.S	LOC108715937	LOC108719541	LOC100497556.L
gpx2.S										rbbp8nl.L	glul.L	LOC108705673	szl	LOC108719253
st6galnac2.L										MGC80993	rps19.S	ldlr.S	Xelaev18002683m	LOC108718863
sox7.S										foxi1.S	prpf8.S	olig2.L	Xelaev18040913m	Xelaev18013173m
alcam.S										LOC108719420	mfap1.L	cldn5.L	xkr4.L	LOC108715890
cdk5r1.S										mespa.S	fam103a1.L	Xetrov90002989m.S	Xelaev18041870m	degs3.L
entpd2.S										nodal.L	rpl7a.L	pkn2	ndufb4.L	MGC52622
cass4.L										Xelaev18003954m	smarcc1.S	mvp.S	xlmo1	Xelaev18018260m
clca3.L										chrna2.L	eif3f.S	Xelaev18013159m	cux2.L	Xelaev18014160m
itprip.S										mixer.S	bag6.S	hist1h2aj.L	LOC108697833	dnah1.L
LOC108701422											pmpca.S	slc16a6.S	LOC108700036	ventx1.1.S
arhgef19.L											rpf1.L	Xelaev18009900m	twist1.L	LOC108716735
Xelaev18024458m											snrpf.S	fat2	LOC108706492	marc1-like.L
LOC108715348											add3.L	LOC108707128	cacnb2.L	ventx3.2.L
a2m.S											rps3a.S	hes5.2.L	LOC108716562	rsad2.S
lsp1.S											zyx.S	LOC108700753	mafb.S	cyp2u1.L
anpep.S											zc3hav1l	mafb.L	sp8.S	gata3.S
Xelaev18029244m											smarca4.S	LOC108715641	sox17a.S	c2cd4d.S
socs2.L											skiv2l.L	crebl2.L	star.L	pygb.S
irf8.S											supt5h.S	LOC108703840	glis2.S	mmp19.L
cass4.S											eif3a.L	foxn4.L	arhgef40.S	LOC108712963
admp2.L											kifc3.L	kcna3.L	rgmb.S	trim29.S
fzd2											sec61b.L	pcdh8.S	MGC52759	fut3.L
cdx2.L											sf1.S	slc18a1	LOC108712894	Xelaev18046181m
sema3f.L											c15orf39.L	Xelaev18036077m	pdgfra.L	LOC105945417.L
lin28a.L											srsf5.S	rasgef1b.L	Xelaev18006325m	Xelaev18005524m
LOC108698352											rps26.S	alk	Xelaev18037313m	gdpd1.L
Xelaev18000483m											rtn4.S	khk.S	LOC108701725	pros1.S
LOC100489157-like.S											azin1.S	znf608.S	Xelaev18003215m	LOC108698798
cxorf21.S											Xelaev18030249m	tbx15.L	efs.S	LOC108706358
trpm5.L											rps5.L	pkn1	MGC154351	vwf
capn8.S											rps7	LOC108705785	Xelaev18044351m	egr3.S
LOC108695521											pkp2.L	atf4.S	gabarapl1-b	ventx1.1.L
lrrc75b											bop1.S	LOC108716019	plk3.L	LOC108700765
epha4.L											Xelaev18003734m	adra2a	LOC108697415	syt8.L
itprip.L											atp1a1.L	tead4.L	lrrtm3.S	btc.L
itga6.L											krt8.S	Xelaev18004346m	adra2c.L	fam83f.S
LOC108712667											son	lmod1.S	dram1	LOC108712697
adam9											cad.L	dgka.L	vegt.L	cfp
socs3											parp1.L	LOC108703537	gata6.L	Xelaev18025621m
mst1.L											khsrp.S	mospd1.L	sel1l3.L	Xelaev18043100m
foxj1.S											ube3b.S	LOC108697184	pdp2.L	LOC108713032
LOC100489887.L											xpc.L	LOC108703752	LOC108698246	Xelaev18009383m
lct.1.L											rpl7.L	mreg	Xelaev18009887m	LOC108700185
cdk5r1.L											mzt1.S	ptger3.S	tdgf1.2.S	LOC108696520
kitlg.L											fundc1.S	cebpb.S	nrp2.S	nr1i3.S
plekhg2.S											vapb.L	LOC108716545	Xelaev18004736m	tmigd1
pdgfa.L											gldc.S	avpr1a.S	aacs.L	podxl
pou6f1.L											nop10	egr2	mertk.L	nxpe2.L
col4a6.L											mfge8.L	dst	zbtb18.S	l3mbtl1.S
Xetrov90029963m.L											rps4	LOC108698332	LOC108696704	gal3st4-like.2.L
LOC100491629.L											rpl37a.L	LOC108699726	fam149a	nr1i3.L
klhl23.L											tmem111.L	Xelaev18000418m	nek6	gata3.L
casp7											ndufc2.S	apeh.L	Xelaev18009848m	Xelaev18002791m
alpl.L											ano5.L	h2afj.L	Xelaev18040914m	cdx4.S
LOC100490918.L											hp1bp3.S	tcim.L	tfr2.L	LOC100487224.L
foxj1.L											mdk.L	insm2.L	Xelaev18005132m
lhx3.L											znf845	cyp27b1.L	Xelaev18002937m
yrdc											sf3a2.S	znf71.L	dll1.L
elavl3.L											nol6.L	Xelaev18006312m	LOC108704612
bcl3.L											casc3.S	myod1.L	muc5ac
kiaa1324.S											rps27a.S	LOC108712665	Xelaev18042001m
fam83c.L											rps29	Xetrov90020553m.S	ccdc141.L
cish.S											pdrg1.S	hcn4	arhgap39
sox18.S											rpl17.L	znf185.S	pmp22.S
LOC108696887											pbrm1.L	egr2.L	dtx4.L
irg1.L											srrm2	vav1.L	Xelaev18021795m
socs3.L											birc2.S	cyp27a1.L	lsp1.L
acod1l.L											Xelaev18046288m	nova2.L	myb.S
LOC108715654											rpl17.S	Xelaev18032716m	fbn2
LOC108717350											srcap.L	Xelaev18003767m	LOC108711791
tbc1d24.2.S											hist2h3c.L	tfec	gata4.L
dhx58.L											mtx1.S	Xelaev18040896m	LOC108717200
ror2.L											nup188.S	Xelaev18003544m	fam3d.S
LOC108704510											tkt.L	lef1	LOC108713650
afap1l2.L											rpf1.S	Xelaev18011648m	Xelaev18040771m
zeb2.S											rpl17-c18orf32	LOC108706197	htra1.L
cxcl10.L											rps2.L	icam5	nr5a2.L
gpr65.L											taf12.S	LOC108717076	gja4.L
atp12a											osbpl2.L	pcdh8l.L	noxo1
acod1											ND5	LOC108706274	creb3l4.L
lypd2.L											cpsf1.L	LOC108717933	LOC108700767
meis3.L											bola2.L	LOC108718314	LOC108710968
nhs.L											bcorl1.S	skida1.S	hoxc12.S
fosl2.L											dusp6.S	LOC108705740	Xetrov90018634m.L
col4a5.L											noc4l.S	cryaa2	LOC108696040
LOC108704223											sbno1.L	Xelaev18006063m	Xelaev18039988m
cxcl11.L											mvp.L	txnip.S	tbc1d5
fgd1.L											zic1.L	akap6-like.S	LOC108718316
akna.S											maff.L	Xelaev18002540m	sox17b.2.L
dennd2c.L											map3k1.L	LOC108713490	nectin1l2.2.S
slc7a8.S											ube2d1.L	gli2.S	prelid3a.L
sp6.L											znf740.S	Xelaev18031374m	six2.S
cyp26b1.L											sox15.L	bcl2l10.S	LOC108706156
cd274.L											fdps.L	trim46	Xetrov90029923m.S
tril.L											isg20l2.S	LOC101243550	Xelaev18000237m
lhx3.S											stc1.L	Xelaev18028550m	chrna4.L
ltbr											dzip1.L	LOC108705105	p2ry11.S
hamp2.L											LOC108695511	foxd1.S	LOC108697967
il10rb.L											fth1a	Xelaev18009008m	LOC108713819
unc93a.L											LOC108719517	ig100492381.L	LOC108718886
c3.L											fam174b.L	Xelaev18038081m	mnx1.L
											tnk2l.S	LOC108709823	lhx1.S
											sh3bp4.S	LOC108698095	bix1.1.L
											tcf7l1.L	irx4.L	slc2a1.L
											rnd3.L	serpinh1.S	snai1.S
											scube2.L	LOC108698800	Xetrov90018471m.L
											Xelaev18033924m	mafa.L	hoxc12.L
											tgif2.L	znf572.L	trpc6.L
											Xelaev18006061m	Xelaev18029130m	wnt11.L
											ralgds.S	Xelaev18019664m	f2rl2.L
											znf721	acer1.L	dhcr7.L
											vmn2r26	Xelaev18040986m	tfap2b.S
											dpysl2.L	LOC108702449	LOC108706202
											erbb3.S	LOC108699748	Xelaev18027229m
											dleu7.L	nr2f2	rnf112.S
											zic4.S	LOC108703467	Xelaev18002673m
											alg14.S	axl.S	hhex.S
											hapln3.L	Xelaev18046094m	LOC101733813.1
											trank1.L	jun.L	mrc1
											dlx6.S	LOC108712691	Xelaev18012936m
											prelid1.S	robo4.S	tsc22d4
											abca1.S	emx1.2.L	LOC108702593
											rbm45.L	LOC108716750	niban2
											rai14.L	ugt2b4.L	ca14.S
											slc7a5.L	jun.S	prkab2.S
											tiparp.L	Xelaev18026857m	slitrk5.S
											pcdh9.S	Xelaev18028055m	dnase1l3
											itgb1bp2.L	tox2.S	hcar3.L
											cenpv.L	Xelaev18030606m	cbln2.S
											timp3.S	Xelaev18028821m	Xelaev18005944m
											gli1.S	Xelaev18034569m	pigz.L
											angptl4.L	itgb4.S	fzd8.L
											admp.S	Xelaev18022564m	dusp10.2.S
											pcbp2.S	Xelaev18040117m	edn2.S
											gfod1.S	actc1.S	xdh.S
											tex264.S	pde6d.S	tuft1.L
											rgn.L	cmpk2.S	LOC108708505
											LOC100496797.L	fstl1.L	LOC108704569
											Xelaev18042341m	fbxo24.L	sstr1.L
											LOC108700025	pappa	LOC108720014
											prss27	Xelaev18041918m	LOC108712221
											runx1	Xelaev18009763m	Xelaev18009605m
											chga.S	dcst2	dnhd1
											il10rb.S	hcls1.S	muc3b
											plekhs1	arhgap36.L	LOC108703547
											pappa.L	Xelaev18031009m	vps37d.S
											zic4.L	ppp1r3e	catip.L
											st3gal1.L	Xetrov90028960m.L	fgf20.S
											rab11fip4	LOC108704362	hoxd9.S
											plxnb1.L	afap1l2.S	LOC108703460
											LOC108709819	Xetrov90026252m.L	sox17b.1.S
											fabp3.S	parp6.L	sox17a.L
											slc7a11	LOC495139	bmp7.1.L
											gprc5b.S	cacng4.S	styk1.S
											abcd2.S	Xetrov90019340m.S	npbwr2
											myom1.L	inpp5e	il16.L
											tbkbp1.S	LOC108696845	LOC108704529
											ndnf.L	Xelaev18026517m	cacnb1.S
											LOC108698034	Xelaev18040122m	xhoxc8
											chst5.L	jund.L	plekhg5.L
											acot8.S	LOC108705667	gata6.S
											slc9a2	Xelaev18026908m	LOC108705130
											slc9a3r2.L	fibcd1.L	relt.S
											tap2.L		pou3f1.S
											cers1.L		pycard.S
											ttc34.S		LOC108699675
											nt5dc1.S		agr2.S
											cpm.L		tbx6
											rasgef1a.L		Xelaev18035970m
											col9a3.L		LOC108711628
											Xelaev18006569m		htr5a.L
											itgb8.L		adm.L
											kif1a		sox18.L
											vasn.S		klb.S
											Xelaev18028100m		LOC100495222.1.L
											MGC147188.L		en1.L
											Xelaev18024706m		colca2.L
											epha7.L		Xelaev18042237m
											efnb3.L		krt15
											LOC108698350		LOC108717617
											LOC108698354		LOC108709763
											pxdc1.L		Xelaev18032449m
											fbxo41.L		nr5a2.S
											Xetrov90020487m.1		vgll3.L
											tmprss9.L		Xelaev18016829m
											adm2.L		pkdcc.2.S
											col12a1.S		LOC108700092
											ascl2.L		mx1
											onecut2.L		cd80.L
											kcnh4.S		stx1b.L
											LOC108706753		ccndx.S
											lrrc9.L		hoxc9.S
											LOC108701215		tril.S
											LOC108715070		Xelaev18008846m
											trarg1.S		fgf20.L
											LOC108717439		Xelaev18006376m
											rai2.S		Xetrov90023614m.L
											egfr.L		mab21l3.S
											samd12		kcna2.S
											tmem125.S		gdf3.S
											Xetrov90002352m.L		faim2.S
											tns4.L		snai1.L
											tnip3.L		gucy1b2
											dmrt3.L		Xelaev18042907m
											Xelaev18015119m		nodal3.2.L
											nkain1.S		LOC100495966
											zmym3		sncb.L
											foxd4l1.L		noxa1.L
											MGC116527		Xelaev18003943m
											edn2.L		LOC108701312
											col11a1-like.L		zscan5a
											LOC108707481		antxr2.S
											LOC108717594		LOC108702204
											crispld2.S		lzts1.L
											mptx1		htra3.S
											proc.L		rasip1.L
											LOC108699681		slitrk1.S
											kremen2.S		Xelaev18011386m
											gbx2.1.L		LOC108708636
											emilin1.L		krt222
											mybpc2		LOC108713700
											s1pr1.L		pycard.L
											col4a2.S		LOC108705132
											cebpe.S		Xelaev18034666m
											mchr1		hoxd10.S
											LOC108703573		LOC108705770
											rgs16.S		sftpb.S
											slc25a4.L		pex5l.S
													nrip3.L
													LOC108707804
													Xelaev18002252m
													kctd12.L
													fam167a.S
													Xelaev18045520m
													prr5l.L
													LOC108713121
													lgi4.L
													slitrk3.S
													hoxd10.L
													mix1.L
													LOC108715719
													hhex.L
													Xelaev18018965m
													mgst2
													gpr45.S
													foxj2-b
													hmx3.L
													mesp2.S
													sox12.L
													nkx2-5.L
													ccl20.L
													wnt16.L
													pax1
													Xelaev18036955m
													rem1.L
													slc9a4.L
													gas2l2.S
													rom1.S
													ngef.S
													Xelaev18032910m
													LOC108710750
													LOC101732299.L
													mesp2.L
													Xelaev18000681m
													Xelaev18019163m
													pax3.L
													Xelaev18013481m
													LOC108697063
													vstm2b.L
													Xelaev18001114m
													pex13
													vsx2.S
													ralyl.S
													spib.S
													hoxc10
													muc1.S
													ntn3.L
													lef1.L
													bmper.L
													scn2b.L
													LOC495206
													Xelaev18011064m
													ifnl3
													nodal.S
													shh.S
													pnpla7.L
													nr2f1.L
													igfbp4.L
													slc16a5-like.S
													c1ql1
													Xelaev18033293m
													znf410
													mfsd2a.L
													pitx2.S
													LOC108716865
													Xetrov90024317m.L
													LOC108718080
													spns2.S
													chst3.L
													emx2.L
													Xelaev18003951m
													MGC82209
													rorb.L
													LOC108704130
													amigo2
													fbn2.S
													klhdc8a.S
													LOC108697572
													Xetrov90015502m.L
													LOC108714665
													gsc.L
													Xelaev18026287m
													npas2.L
													LOC108718887
													LOC108710786
													LOC108699131
													hoxb3.L
													rerg.L
													hao1.L
													ppp1r16b.S
													Xelaev18000337m
													foxa4.L
													hoxc8.S
													barhl1.L
													Xelaev18034023m
													wnt5a.L
													LOC108717435
													onecut2.S
													sia1.L
													Xelaev18032521m
													LOC108719251
													pth1r.L
													pdgfra.S
													hsd17b6
													Xelaev18021016m
													Xelaev18028212m
													slc2a6.L
													or10a7
													LOC108705598
													LOC108699856
													Xetrov90015502m.S
													menf.1.L
													Xelaev18024303m
													pkdcc.2.L
													mespb.S
													Xelaev18031473m
													prdm12.L
													hoxc13.S
													cbm101731809provisional
													fgf3.S
													LOC108712674
													LOC108706704
													Xelaev18028211m
													Xelaev18002860m
													bix1.1.S
													otp.S
													pitx3.L
													adcyap1.S
													des.1.S
													nodal3.1.L
													otx2.L
													rgs1.L
													homeobox100496651-provi
													LOC108705533
													kcnab3.S
													sebox.L
													osr1.S
													LOC108709611
													camta1.L
													gata2.L
													Xetrov90010614m.S
													lrit2.S
													val.L
													Xelaev18010420m
													osr2.L
													LOC108702948
													osr1.L
													chrna4.S
													mespa.L
													mix1.S
													Xelaev18010896m
													pcdh8.2.L
													osr2.S
													gata4.S
													mespb.L
													LOC108705749
													pcdh8.2.S
													xenf
													nodal1.S
													bix2.L
													nodal1.L
													cml
													LOC108705994
													nodal2.L
													krt16.S

## Sheet: St9-10_Decrease
List of Genes for all Overlapping Temporal DESeq Groups, corresponding with supplemental figure 3
All_Lineages	Epi-Meso-Neur	Epi-Meso-Endo	Epi-Neur-Endo	Meso-Neur-Endo	Epi-Neur	Epi-Meso	Epi-Endo	Neur-Meso	Neur-Endo	Meso-Endo	Epi	Neur	Endo	Meso
btg3.S	tnfrsf10b.L	gpr12	LOC108705579	Xelaev18029627m	lefty.S	ccna1.S	Xelaev18036438m	bcl6.L	admp.L	Xelaev18028849m	Xelaev18037589m	ventx2.1.L	hes5.2.L	gfi1.S
ccnb5.L	nt5dc3.S	enc1.2.S	c14orf159.L	hn1.L	bix1.1.L	reep1.L	zbtb43.L	sun1.L	foxd4l1.1.L	txnip.S	esr-5.S	ventx2.2.L	hes5.1.L	tfpi2.L
btg5.1.L	LOC108705790	pced1a.L	nhsl1	slc25a37.S	tor3a.L	slc4a1.L	fzd1	myo1e	xzar2	msmo1.L	st3gal4.L	btg5.1.S	hes9.1.S	pip5k1b.S
lrrc40.L	slc7a6os.L	Xelaev18016928m	pcnt.L	crtc2.S	tmem116.L	anapc10.S	loc733728.L	nsmf.S	foxd4l1.1.S	esr10.S	zfpm2.L	ventx2.1.S	gsx1.L	galns.L
tfrc.L	ddit4.S	zfp36l2.1.S	akap11.S	fam126a.S	kctd9.S	nol4l.L	cep290.L	chmp7.L	parp15	lix1.L	sox17b.1.S	bix1.2.L	neurog3.L	fbxl21p.L
znrf1.L	espl1.L	LOC108717639	usp15.L	ctsc.S	adamtsl1	LOC108707252	rbm24.L	palb2.L	rrm2b.S	rfwd3.S	mxd4.L	mcidas	foxd3.S	march2.S
plbd2.L	clns1a	pygo1.L	ipp.L	vldlr.L	plch1	sh2b3.S	fzd1.L	vamp7.L	nt5dc3.L	tmem52.S	tnfrsf19.L	hbp1.S	hes9-1.S	zfp36
cpeb1.S	bmp2.L	anapc10.L	oxr1	rp2.S	limk1.L	rhobtb1.L	mctp2.L	znf436	lsm1.S	dnd1.L	xylt1.S	stard13.L	hes5.7.S	nov.L
map4.S	atg4a.S	zdhhc1.L	serinc2.L	snph.L	gpr75.S	enpp2	pcmtd1	tnfaip8.S	oaz2.S	snapin	h1f0.S	hs3st1.L	hes3.L	LOC108714659
ikzf2.L	n4bp3.S	trappc13.L	rnf185.L	ndel1.L	rnf103.L	LOC108714466	klf6.S	c16orf46	sod2	abhd18.L	tm2d3.S	c19orf66.L	lfng.L	pias2.S
slc39a9-like.1.S	eme1.L	rpain.S	tpgs1.S	ndrg4.L	b9d2.L	Xelaev18032680m	stc1.S	cry1.L	sod2.S	hes5.5.L	Xelaev18041248m	nkd1.L	LOC108699863	mttp
cpeb1.L	dnajb14.S	dtl.L	znf81.L	hdac2.L	clcc1	otud3.L	fcho1.L	tmem169.L	socs6.L	tesk1	cemip.L	trim14.S	adamts1.L	mknk1.S
ccdc69.S	znf280d.S	prr14l	vegfa.S	kmt2a	zdbf2-like.L	ift80.L	adgrg1.L	c3orf17.L	dkk1.L	nupr1	sh2d4a.S	gnb1l.L	cbx4.L	fam53c.L
btg4.L	zdhhc7.S	ankrd37.S	bnc1.L	tnfrsf19.S	rab20.L	socs2.S	stx11.L	taf5l.L	phlpp2.L	hes2.L	usp54	bnc1.S	neurog2.L	gen1
tfrc.S	exd1.L	loc100158305.L	rnf185.S	ncor2.S	sertad2.S	cfap97.L	birc7.L	Xelaev18031390m	coq2.L	pdgfb.S	rsad1.L	avpr2.S	casd1.S	mbd6.S
hes5_X2.L	cdc42ep4.S	ikzf2.S	uhrf2.L	stmn1.S	LOC108704278	tubgcp4.L	snx7.S	usp22 a	mb21d2.L	loc100497443.L	abhd5.L	baiap2l2.S	Xelaev18013247m	tubz1.L
Xetrov90003513m.L	tcf20.L	ubxn2b.L	cables1.S	pias2.L	brd1.S	ahsa1.L	pacrgl.L		tor1a.S	spsb1.S	LOC108699404	prdx2.L	foxd4l1.2.L	gosr1.S
dnajc9.L	kctd3.L	lig4.L	acox2.L	ndel1.S	mb21d2.S	rgs12.L	ccnb1.L		tpst2.L	LOC108698822	pcdh18.S	atn1.S	ggt5.L	zbtb39.L
LOC108708333	mob3c.S	cdc7.L	sdhd.L	mos.L	cnppd1.L	MGC86530	zbed1.L		optn.L	pnpla8.L	nfkb2.L	hlx	gigyf1.S	gtf2a1l.L
lrmp.L	ism1.L	mgc69520.S	dnajb9.S	arap1	casp9.S	atf7ip.S	zdhhc23.L		slc35a1.L	edem1.S	map1lc3c.L	klhl26.L	ahr.S	kcnh5.S
nr3c2.L	fchsd2	spsb1.L	rsbn1l.S	slc48a1.S	pisd.L	uhrf1bp1l.L	pgam1.S		fgfr3.L	zbtb43.S	Xelaev18021540m	szl	cyp26a1.L	alg6
fbxo43.S	fgfr1.L	itga5.S	ing1.L	bri3.L	gpr63.L	tdgf1.1.L	hivep1.S		habp4.L	bcl6.S	c11orf96.L	slc35a1.S	mob2.2.S	arhgap31.L
tmem19.L	c5orf30.S	coq6.L	ring1.S	fasn.L	vegfa.L	ncoa6.L	kif7.L		nadk.S	rasd1.S	MGC83480	fam110a.S	pim1.S	prickle2.L
akip1	trpv4.L	ubn1.L	slc18a2.L	casp2	foxi2.S	ube2s.L	lrp5.L		aste1.L	klf15.2.S	xrcc6bp1.L	aco2.S	thap11.L	kdm7a.S
cdca7	klhl12.S	kank1.L	fam21a.L	lgr4.S	elmsan1.S	bcl2l14.S	txnl4b.S		trerf1.S	znf148.S	hhipl1.S	mmd.S	cdc42ep3.S	lpar1.S
stil.L	snx7.L	zfyve1	cyld.S	fam83g.L	LOC100489074.L	lmo4.1.S	them6.L		klf2.L	ccdc18.L	ifngr2.1.L	LOC108709443	cyr61.S	ckap2l
btg4.S	tcf20.S	birc7.S	c1orf116.L	spdyc.L	usp54.L	brf2.S	mbd2.S		fbxo33.L	esr-5.L	arid5b-like.1.S	spry2.S	rnf24.L	znf70
cyr61.L	znf518a.S	mxd3.L	tmem117.S	slc6a16.S	hs6st3	usp12.S	pcdh20.S		lpar6.S	pim3.L	e2f1.L	zdhhc12.L	LOC100036994	fgd3.S
klhl13.S	oaf.S	pdzd2.L	pkd1.L	slc4a11.S	polr3g.L	Xelaev18041850m	ccdc71l.S		nck2.S	siah2.L	mtmr8	acot2.S	park7.L	c7orf26.L
ssx2ip.S	slc30a7.L	sirt3.2.L	jade1.S	arhgef7.L	socs6.S	irs2	ctsc.L		cct4.L	gemin5.L	insm1.S	adamts8	adamts1.S	znf229.S
map3k2.S	slc25a44	wdfy2.S	evc2.L	scnm1.L	lurap1.S	irf6.2.L	tor2a.L		rasa3.L	zfand4.S	ldlrad4.S	tdrd15.L	hes7.1.L	rims2
fbxo43.L	LOC108716797	emilin2.L	LOC108714398	tmem214.S	sntg1.L	acvr1.S	cerk.S		ube2j2.S	ifih1.L	kank1.S	chek1.S	fbxo32	senp1.L
tmem106b.S	fntb.S	ptprh.S	fdft1.S	coq10a.L	c2orf69.L	bicd1.L	larp6-like.1.L		ncoa7.L	kxd1.L	prkcz.S	lnx2	ccdc71.S	ikzf5.L
snrk.S	cep76.L	b3gnt5.S	slc25a43.L	sos1.S	ube2w.S	trim39.L	fut11.S		hells.S	plpp6.S	nr1h2.L	mapkapk2.L	arhgap29.L	ephb3.S
garem1.L	stambp.L	kif11.L	fam8a1.L	usp49.S	ptges.S	dcun1d3.S	dock7.L		dusp1.S	cep164.S	cdyl2.S	fam149b1.S	timp3.L	prex1.S
LOC108703747	akap13.S	lgr4.L	mlh1.S	msantd3.L	slc39a1l.L	top3a.L	LOC108700788		saysd1.L	lsm14b.S	tmem185a.S	tmem184a.S	snx21.L	enpp4.L
ccdc69.L	chp1.L	leprot.L	tmem259.L	ormdl1.S	dact1.L	morc2.S	prpsap2.L		abhd13.S	rnf138.S	LOC108718785	cdkl5.L	fam13b.L	zwilch.S
oat.1.S	gemin5	ntmt1.S	nr3c2.S	wasll.L	LOC108702912	pphln1.L	nbeal2.S		cep55-like.L	soga1.S	kbtbd3	trpm7.S	insm1.L	map3k9.L
ccna1.L	pard6g.L	MGC147172.L	pgam1.L	gigyf2.S	bves.L	tmem164.L	evi5.S		fntb.L	spice1.L	fam89a.S	zpd.L	snrk.L	xrcc2.L
arhgap20.S	fbxo46.S	myc.S	adgrg1.S	baz1b.L	ccdc125.S	rgs12.S	irf2bp2.L		ccnb2.S	sike1.S	arhgap28.L	slc35e2b.L	fgfr4.L	LOC108711754
atf6b.S	tigd4	map2k4.S	klhl17.L	peli1.S	LOC100037197	zfc3h1	fam13a.S		arid5b.L	raver1.S	zgrf1	aff2.L	tspoap1.S	lipe.S
rdh13.L	limch1.L	poc1a.L	kif13a	rab11fip5.L	bfar.L	rapgef2.L	mpp5		dusp1.L	ccdc138.L	gpr137b.L	frmd4a	xarp-like.S	hsd17b7.S
LOC108708627	bicc1.L	fastkd1.L	irf2.S	mga.L	rassf10.S	serinc3.L	rad1.L		kifc3.S	dnaja4.2.S	abo.2.L	znf362.S	atf7ip2	cry2.S
ssx2ip.L	zic2.L	znrf1.S	lbh.L		slc30a7.S	lrrfip2	ccng2.L		spen	cyp2r1.L	csrnp1.S	nubp1.S	gramd3.L	birc2.L
atf6b.L	mcm3ap.L	sept9.S	txndc9.L		eef2k.L	LOC108704248	cnot8.S		ifnar2.S	pdzd8.L	trabd.L	alas1.L	znf750.S	ift81.S
fhdc1	pwwp2b.S	dnajc16.L	ammecr1l.L		hsf2.L	gad1.2.S	syne2.2.S		smad2.L	pmfbp1.L	zak.L	ip6k2.S	arhgap29.S	cyld
gmnn.L	lysmd4.L	pcmtd2.S	pms2.L		trappc4.S	dhx38.L	tmem128.S		klf4.L	traf3.L	fbp2.L	fam110b.S	tshz1.S	gpi.S
MGC68639	pigu	LOC108706498	tanc1-like.L		acaca-like.S	oxsm.S	ccser2.L		arhgap20	nek2.S	scnn1g.S	bambi.L	pim1.L	tgs1.S
intu.S	pnisr.L	fbxo30.S	sun1.S		bnip2.S	atxn1.S	hps6.L		hbp1.L	tpra1.S	cd59-like.L	wasll.S	rnf24.S	tsen34.L
map4.L	taf5l.S	elmod2.L	trim2.L		mfap3l.L	znf526.L	cep104.S		sys1.L	sgk223.L	ttc39a.L	mrps30.S	mccc2	c21orf91.S
elk4.L		kazn.L	crls1.S		ell.L	agap1	MGC52683		lats1.S	LOC108719489	pcmtd1.S	rhov.S	klf2.S	cpeb2-like.S
rsbn1l.L		tnfsf11.L	arf6.L		MGC83539	ccdc61.L	epb41l4b.S		pias3.L	pds5b.L	fam69b.L	apcdd1.L	dynll2	siva1.L
hs3st1.S		spdl1.L	rabgef1		bicc1.S	ssbp2.S	fdxacb1.L		cse1l.L	depdc1b.L	fkrp.L	cxcr4.S	pdp1.L	znf639.S
jade2.L		irf2bpl.S	acap3.S		gcnt1.L	golgb1.S	ccs.L		cse1l.S	dand5.L	foxn4.S	LOC108705257	fndc3a.L	MGC154819
pan2.L		slc25a37.L	ythdc2.L		ccdc71l.L		ccdc107		zcchc14.S	kazn.S	slc15a4.L	foxi4.2.L	znf750.L	mal2.L
ppp1r3b.S		prdm2.L	idh3a.L		rel.S		arhgap11a.2.S		nfkbil1.L	numb.L	arv1.L	Xelaev18030446m	sdc1.L	kcmf1.L
pcnxl4.L		rbm38.S	hhipl1.L		trim8		gxylt1.L		mycl.S	kmt2e.S	LOC108704241	lmo4.2.S	cr1b	epc2.S
LOC108718425		ect2.L	dync1li2.S		tmcc1.L		lats2.L		zfyve9.S	tbccd1.L	nr3c1.L	spry2.L	Xelaev18009275m	suv39h1.L
haus4.L		glt1d1.L	adh5.L		c5orf30.L		sprtn.S		spryd3.S	eda.L	coq10a.S	nr2c1.L	btbd9.L	ercc4.L
fibp.L		tbc1d31.L	gtpbp6.S		mid1.S		mgat3.L		znf462.L	axin1.L	lpcat1.S	ung.L	gramd2b	rfxap.S
rcbtb1.L		atp6v0a2.L	tlcd2.L		popdc3.S		rnf44.S		blcap.L	zfand4.L	lss.S	rbm46.L	myd88.S	wac.S
kiaa0141.S		dnmt1.S	dock9		tldc1.L		tshz3.S		ppp2r2d	scap.L	chsy1.S	abhd15.L	pim3.S	fam221a.L
adcy6.L		mbd4.L	mau2.S		mfn2.L		scai		ndc1.S	tnrc6a.S	tdp2.S	plin2.S	pbx3	loc100158433.L
arhgap20.L		MGC83673	arhgap40.S		smarcad1		topaz1.L		dnajb12.S	pwwp2b.L	tmem251.L	dap.L	kmt2e.L	dbf4b.L
cat.2.L		eif2ak3.S	adamts6		nadk.L		kiaa2026.S		eea1.S	stk17a.S	mpv17l2.L	cmip.S	kit.S	zdhhc20.S
kdm8.L		etv3l.S	gsap.L		itpk1.S		wdr37.S		grhl1.S	wdr7.S	mecp2.S	bod1.L	slc38a3.S	gls.L
usp33.L		tacc3.S	zfpm1.S		kctd9.L		edc3.L		spag5	cep85.L	plekho1.L	josd1.L	topbp1.L	mterf1.L
trps1.L		dip2b	ippk.S		LOC108695564		zcchc14.L		e2f4.S	prc1.2.S	hspa13.L	adrb3.L	hdac9.L	rbm38.L
hs3st1		MGC98819	pttg1ip.2.L		btbd9.S		MGC81163		f2rl1.L	Xetrov90023445m.L	tmem143.S	bambi.S	cdkn1b	sdf4.L
klf15.2.L		usp33.S	gtf3c1.L		ppargc1a.L		rnf169.S		pcyox1l.L	git2.L	aggf1.L	LOC108695571	jund.S	clic1.S
blm.L		rcan3.L	sipa1l3.S		ago1.S		pex12.L		kif3a.S	degs1.S	kcnj5.L	LOC108712538	atf7ip.L	rap2c.S
rspry1.S		smad2.S	tlcd2.S		MGC53150		sema4g.L		znf554.L	rsf1.S	fbxw9.S	lrch1.S	btbd10.S	rnf19a.S
LOC100489554.L		pex6.S	ttc8.L		plin2.L		cmtm7.S		ddx3x.S	med13.L	bbs1.L	slc25a10.L	amot.L	tdh.S
smtn.S		snx25.L	rsbn1.L		b4galt5		exoc8.S		pcyt1a.S	ccdc94.L	brip1.L	tbk1.L	sfrp2.L	fermt2.S
tm2d2.S		fbxo31.L	mpi.S		bdp1.S		ralgapb.L		emc8.S	cc2d1b.S	mis18bp1b	macc1.L	rasd1.L
ndst2.S		orc1.L	klf6.L		dnajb12.L		cdc45.L		rab8a.S	timm23.L	rnaseh1.L	frmd4b.L	kansl1
gtf3c2.L		rgs3.S	wdr60.L		pik3ca.S		oat.1.L		kif18a.L		loc100216027.L	commd9	sptssb
tubg1.L		smad9.L	dscr3.L		atad3a.L		mia3		anapc7.L		zbtb5.L	lpcat2.S	mars2.L
wdr6.L		chd1.S	LOC108718309		c11orf24		csgalnact2.L		rab11fip1.L		baz1a.S	clic1.L	hivep2.L
Xelaev18041239m		msantd3.S	cpeb3.S		pex12.S		tmem64.L		aplp2.L		snx16.S	cdc37l1.L	metrnl.L
ppp1r3b.L		LOC108703834	tcirg1.L		tanc2.L		ccnl2.S		ppp2r1a.L		LOC108703781	noct.S	nf1.L
rbm26.L		dock4	atp10b		trit1.L		tnks2.S		nol9.L		errfi1.S	zer1.L	slc25a40.L
cbx4.S		enpp2.L	sec24b.L		LOC100127316		Xelaev18028646m				esyt3.S	ing3.L	bcor.S
ccng1.S		strbp.L	zbed1		atg14.L		h1foo.S				tfap4.L	lpar6.L	fosb.S
nsl1.L		vps26b.L	ice1		arl10b.L		tradd.L				map11	cdk5r2.S	oraov1.S
lrrcc1.L		rfx5.S	josd1.S		Xelaev18001402m		orai2.L				LOC108705825	bach1.L	plk1.L
wdr20.L		cep112	plcl2.L		acot12.L		afdn.S				LOC397949	ube2j2.L	entpd6.L
ccdc191.L		mllt1.L	wrap73.L		ppm1k.S		plekhg1.S				fam219b.L	atf7.L	papd4.L
wdr20.S		mtbp.S	ptpn21.L		pde10a.S		kif4a.L				plekhg4.S	zbtb16.S	stam2.L
loc100491633.L		ankrd12.L	pex11a.L		cdc42ep2.L		gtf3c4.L				LOC108708239	slc30a6.L	tmem52.L
phf19.S		mex3d.L	styx.L		alg11.L		tnfsf11.S				vmac.L	LOC108698533	nr1h2.S
mylip.S		gtf2h2.S	haus8.L		gpbp1l1.L		acox3.L				d2hgdh.S	aldh2.L	chpf.L
loc100145576.L		rxrg.L	bcl2l12.S		cdc25a.L		MGC85210				cidec.S	thumpd3.L	ints6l
retreg3		tbpl1.L	apc.L		klf12.L		ing2.L				ccdc126.S	pot1.L	oxr1.L
ect2.S		irs1.S	larp6-like.1.S		mief1.L		pik3r3.S				lzts2.L	tanc2	slc4a1ap.S
znrf3.L		rasef	c11orf96.S		dusp22.S		rnf146.S				btg3.L	ppp1r21.L	arrdc3.S
golga5.L		dact1.S	rasa2.L		def8.S		setd1b.L				rab12.S	mid1.L	nfat5.S
cenpl.S		loc100493164.L	dop1a		tank.L		smap2.S				ca12.L	fam63b.S	mkl2.S
zar1l.S		fam134a.S	nab1.S		velo1.L		mapk1.L				Xelaev18011044m	clns1a.L	sik1.S
bmp2.S		pik3r3.L	limd2.S		c1orf84.L		rhof.S				dact3.S	c6orf120.L	atxn1l.S
ndrg4.S		iffo2	map3k2.L		tbc1d10a.L		nasp.L				snap47.L	id2.L	hdac4.L
sik2.L		klhl15.L	cnp.L		arl6ip6.L		kmt5b.S				alg1.L	atp13a1.L	mapkbp1.S
prmt5.L		paqr3.L	ccdc50		c14orf119.L		rnf4-a				ing2.S	tmcc1.S	sbno2.S
septin9.L		fbxo11.S	LOC108717918		satb1.L		cpeb4				LOC108703749	atxn7l1.L	stx11.S
LOC108719544		cenpj.L	thumpd2.L		atxn1l.L		elp2.S				LOC495407	mfsd6l.S	mblac2.L
tada2b.S		prex1.L	mdm2.S		dolpp1.L		sgol1.L				sft2d3.S	rgma.L	iqgap3.L
rnf149.S		zrsr2.L	kdm5b.S		prkcsh.S		ube2z.S				ring1.L	slc35a5.L	pias1.L
gramd2b.S		clspn.S	tesk2.S		b3gnt7.S		prkch.L				daglb.L	dlc1.S	tmtc4.L
tmem171.L		fzr1.L	slf1.L		znf507.L		fam46b.S				tmem243.L	sept8.L	hps5.L
fbxw2.S		anln-like.1.L	mtus1.S		mastl.S		pacsin3.L				golph3l.S	pomgnt2.L	ifrd1.S
trak1		tada3.S	osbpl3.L		arhgef15.L		pde6d.L				pi4k2b.S	avpi1.S	tert.L
fam63b.L		fndc3a.S	lifr.S		kdf1.S		akap13.L				lrp12.S	usf3.S	ing1.S
zfpm1		irf9.L	rab5d.S		ipmk.S		fyn.S				vps33b.L	ccpg1.L	chpf.S
irf2.L		sphk1.L	vps4b.L		LOC108704263		emc1.L				zdhhc9.L	LOC108719634	btbd6.S
zfp36l2.2.L		cenpe.L	LOC108704260		suox.L		ak2.S				zbtb22.S	Xelaev18028029m	kpna2.S
nfe2l2.S		cpeb4.S	prodh.L		cyld.L		ccser2.S				phldb1	cry4.L	arid4a.L
akap11.L		ahctf1.L	plekhg4.L		plekha3.L		pop4.L				kiaa1456.L	fam69a.L	rhou
fut11.L		fgfr3	arhgap18.L		loc100145507.S		evi5.L				Xelaev18038799m	terf2.S	sik3.S
lrriq1.L		cep126	usp15.S		slc30a4.S		sytl2.L				rnmtl1.L	cog3.S	fos.S
arhgap33.S		ncor2	ccnb1.S		tbc1d4.S		ppp1r9a.L				ncoa4.L	zmynd8.L	cyth2.L
klhl13.L		dedd.L	brwd1.L		rab8b.L		nufip2.S				pxylp1.L	pik3cb.L	LOC398398
znf628.L		faim.S	nlrx1.L		fryl.S		znf646.L				furin.L	gpi.L	wwc1.S
uspl1.S		med13.S	rpa1.L		gtse1		usp44.L				c12orf66.S	rhov.L	exo1.S
e2f1.S		gigyf1.L	dlc1		unc119.L		syde2.S				rab4b.S	pnrc2.L	klhl2
kiaa1715.L		pcif1.L	rnf149.L		pikfyve.L		c16orf62.S				vps53.L	cers5.L	trib2.S
lfng.S		esg2-a	tmem55a.L		rpa2.S		dnajc16.S				amacr.L	rai1.L	tpcn2
bcor.L		fam83d.L	helb.L		ptpn12.S		mink1				zswim3.S	dtna.L	taf4.S
znf367.S		poc5.L	rab4b.L		snx17.L		slc30a4.L				zfhx3.S	sepsecs.L	zfhx3.L
wdr77.S		zic2.S	eif6.S		tmem57.L		dpp3.L				LOC108696623	pak7.L	ppp2r3b.L
tfeb.S		fam3a.S	insrr.S		rnf19b.L		arid4b.L				qrich1.1.S	morf4l1.S	rassf1.L
arf3.S		wdr37.L	pak4		hmg20b.L		malt1				MGC85058	Xelaev18033527m	dmxl1.L
etaa1.L		fam134a.L	wnk1.L		sbf2.S		ago4.S				mfsd13a.L	nsmaf.L	maff.S
disp1.L		tbc1d9b	snx10.L		ipmk.L		adam9.S				satb1.S	traf4.L	sema6d.S
gtf2ird2b		arrdc1.S	tor1aip1-like.L		ppp3cc.L		acvr1b.S				efna5.L	cskmt.L	zfp36l1
crtc2.L		mgea5.S	slf2.L		camsap2		c19orf12.S				pank4.L	slc9a1.S	xarp.L
garem1.S		bclaf1.S	tpcn2.L		dnajb14.L		srebf2.L				eif2ak1.L	gmnn.S	incenp.L
tpgs1.L		gnai2.S	zbtb8b.L		rfx7		rab9a.L				c5orf51.L	arhgef7.S	zbtb14.L
rab5d.L		gpr157.L	znf282.S		ppp1r12a.L		traip.L				pid1.S	wdr45.S	pbx3.S
leprot.S		socs5.L	tmtc2.S		fam214a.L		ralgapa2.S				c4bpa.L	asphd2.L	bbs12.L
mecr.S		tex264	znf526.S		sdc3		hspa5.S				znf507.S	mrps16.L	atp10a
simc1.L		zbtb6.S	tesk2.L		otud7a.L		scpep1.L				snx13.S	grb10.L	kcnk5.S
rab11fip1.S		ralgapa2.L	arhgef12.S		pcmtd2.L		pygo2.L				phkg2.L	exoc2.L	pias1.S
nhlrc3.S		kif23.L	akap10.L		c17orf53.L		dnaja3.S				ercc6l2.L	arl10b.S	Xelaev18038459m
dnajb9.L		myo10.2.L	LOC108712891		rrm2.2.S		ildr1.S				zbed6	nckipsd.L	vamp4.L
katnbl1.L		cspp1.L	pdik1l.L		tmem184b.L		mns1.L				wsb1.L	fignl1.L	rgcc.S
pif1.L		tubgcp3.S	mast4		nxf1		samd4a.L				cep85l	bbs5.L	ppp1cc.L
dtl.S			cep350.S		ric1.S		homer2.L				lonp2.L	rfx3.L	tpcn1
soga1.L			slc30a5.S		tmem57.S		zfyve19.L				zufsp.S	ankrd13a.L	LOC108698338
slc8b1.S			myo1e.1.L		adcy6.S		atp8a1.L				chek1.L	mcm6.L	ypel1.S
plxnb3.S			traf3ip1.S		rnf219.L		dlg1				depdc4.L	tnfaip8.L	prdm2.S
aco2.L			usp34.S		sel1l.S		otud7b.S				siah1.L	usp22.S	det1.L
vldlr.S			ssh1.L		chmp1a		nup133.L				ttll5.L	xpo4.S	LOC108713924
bbs9.L			ganab.L		tbp.L		qrich1.1.L				taf1a.L	cenpi.L	rab3a.L
map7d3.L			itga5.L		fer.L		zfyve1.L				entpd4.S	smpdl3a.L	cmip.L
kiaa1958			mfn2.S		zfyve9.L		snx1.S				fam89a.L	phlpp1.L	irf2bp2.S
plch2			ranbp2.S		golga1.L		vps50.L				MGC85180	kiaa1191.L	helq.S
tnfrsf10b.S			rb1cc1.L		aip.L		med14.L				cab39.S	pigg.S	ncor1.S
senp7.L			usp8.S		tubgcp5		tdrd6.L				coq6.S	gpank1.L	enc1.S
plxnb3			stxbp6.L		sytl2.S		abhd17a.S				parl.L	ccdc130.L	rfwd3.L
med13l.L			slc35a5.S		adam10		ythdf3.S				btbd3.L	c5orf24.L	ncoa2.S
ptpn3.S			tspoap1.L		brca2.L		acvr2b.S				uvrag.L	ints12.L	ell.S
hs6st1.L			pias4.S		cbwd1.1.S		man2a2.L				nme6.L	hlcs.L	prr14l.L
fbxo30.L			srprb.L		map3k7.L		irf2bpl.L				Xelaev18032676m	zdhhc3.L	cep152.L
lats2.S			ddhd1.L		rb1cc1.S		kif2c.L				mtfr1l.L	LOC397846	setd1b.S
atf5.2.S			fam13a.L		loc100126636.S		ankle2.L				troap	mief1.S	ckap5.L
tubgcp3.L			grinl1a.L		asxl3.L		nde1.S				samd4a.S	orc2.S	asap2
dok1.L			smc5.S		leprotl1.S		ncapd2.S				tmem203.S	klhl32.L	zfyve16.L
rpap1.S			tpst2.S		snx11.L		stk17a.L				zfx.L	cep57l1.L	znf84
orc4.L			mis18a.L		ip6k1.L		arhgef11.L				fam83g.S	rhbdf2.L	fbxl3.S
cables1.L			znf292.S		slc6a14.2.L		ppp3cc.S				mael.L	otud4.L	emd.S
c10orf2.L			bbs2.S		abcb6.L		fkbp4.L				dhx40.S	ttc9.L	spire2.S
rad17.L			lpar5.S		setbp1.S		casp8ap2				ncln.S	cox5b.2.L	mtmr4.L
arhgap11a.2.L			xrcc6.L		atp9b.L						kctd3.S	thap1	kif11.S
piezo1.S			zbtb8b.S		rfx7.L						ppm1h.L	tspan33.L	insr.S
map7d2			mcm3.L		gigyf2.L						mfsd14a.L	sys1.S	ado.L
psen2.S			rif1.S		rnf220.1.L						znf280d.L	cep170.S	taf4.L
zar1l.L			dusp19.L		syne2						papd5.S	cep97.L	socs7.S
rspry1.L			ddx1.L		pqlc1.1.S						slc22a23.S	mkln1.S	osbpl3.S
aktip.S			atmin.L		necap1.S						hmgcr.L	ankrd11.L	mapre3.L
tmem181.L			nrip1.S		baiap2l1.L						nufip2.L	lin9.S	prc1.2.L
apex2.L			trps1.S		xl64phr						LOC108703844	gpsm2.L	tmcc3.S
depdc7.S			ubap1.L		batf3.S						gng4.S	anapc5.L	c15orf39.L
fam104a.S			txndc11.L		apitd1.L						ube3a.L	mfsd13a.S	phactr4.L
MGC84185			rlf.L		dnmbp.L						uso1.S	arhgap32.S	ophn1.L
LOC108718134			araf.L		dapk1.L						aldh1a2.L	syvn1.L	wdfy2.L
sema4d			fam134c.L		dip2a.S						sirt6.L	mal2.S	plk1.S
LOC108709286			slc35e3.S		akap1						cdc42bpa.L	opa1.S	top2a.L
sertad2.L			zar2.L		mphosph9.L						mesdc1.S	pan3.S	setbp1.L
ndst2.L			mthfr.L		spopl.L						smad4.2.L	b4gat1.L	rell1.L
prkcsh.L			MGC83487		fryl.L						LOC108699305	nbeal1.L	creb3l2.S
ints6.L			tbk1.S		LOC108698716						trap1.L	tmed9.L	sox11.L
tbp.S			ets1.S		fkbp8.L						znf770.L	maea.S	fam193a.S
ikzf4.S			hprt1.L		ipo13.S						ralgps1.S	znf319.S	sap30.S
mcm10.L			tmem131l.L		dcaf5.L						kbtbd8.L	dgkq.L	pgm3.L
lmo4.2.L			vps13c.L		dcun1d3.L						mia3-like.1.L	rubcn.L	inpp4b
paxip1.S			ext1.S		kpna4.L						senp6.S	dyrk3.S	usp1.S
LOC108716761			dync1li2.L		suco.L						kmt2d.L	ppp1r3c.2.L	snx10.S
sec24b.S			mxd1.L		pdpk1.L						zc3h7a.L	fut8.S	cenpn.S
cbwd1.1.L			sptssb.L		mau2.L						jmy.S	ints14.S	tbc1d8
znf318.S			trim8.L		cxcr4.L						pcsk6.L	cyp27c1.S	tspan1.L
ints6.S			znf654.L		fnbp1l.L						bcl7b.L	LOC108704199	psat1.S
ccdc171			gpbp1l1.S		mast2.S						znf518a.L	pdf.S	cdadc1.S
dnmt1.L			dgkh		secisbp2l.S						srgap2.S	pex10.L	slc25a38
mfsd14a.S			ap5b1.L		kdm4a.S						dpp9.L	rassf3.L	vps37a.S
pde8a			fancm.L		klhl22.L						lmo7.S	phf3.L	lipg.L
frmd4a.L			ulk2.L		dhx35.S						b4galnt4.S	trim33.L	hmgcs1.S
syap1.S			triobp.S		dicer1.L						hinfp.S	aktip.L	polr2j.L
LOC108711716			filip1.L		bptf.L						chd8.L	klhl7.S	epc1.S
atxn7l1.S			fkbp6.L		xplcg1a						c5orf42.L	atp10d.L	rab5c.L
tbc1d9			acap3.L		mcoln2.L						cnot8.L	rnf19a.L	cdca2-like.S
rin3.L			got2.L		trim33.S						creld1.L	tyro3.L	ttc17.S
camsap1.L			ago1.L		zhx3.S						nin.L	usp6nl.L	smg6.L
ppargc1b.L			spopl.S		c11orf95.L						mark1.L	ubtd1.L	hook1.S
ksr1.L			abl2.L		spin1.L						fnip1.L	mgat2.L	selenon.L
ncoa6.S			ccdc117		pkn2.L						unc5b	kiaa1671	cpeb2-like.L
rassf3.S			mycl.L		hook3.L						bcl9l.S	arhgef16.L	foxh1.L
atad3a.S			kdm5b		cgnl1.S						rce1.S	plekhf2.L	hlf.S
trappc13.S			ei24.S		nfatc3.S						klhl20.S	aen.L	pik3r4.S
uspl1-like.L			usp37.L		ubap1.S						bach1.S	naa25.S	tnrc6b.S
oxr1.S			pou5f3.3.S		rfc1.L						spred2.L	znf335.L	usp1.L
golga5.S			mfsd6.S		phax.S						morc2.L	csde1.S	foxo3.L
hells.L			glce.S		smap2.L						arfgef2-like.S	slc25a36.S	sin3b.S
mtus1.L			bcdin3d.L		clint1.L						cdc42se2-like.2.L	ankrd35.L	cep350.L
cnksr2.L			znf292.L		ankrd49.S						fuca1.L	tgfbrap1.L	mgc89871.S
zbtb5.S			csnk1d.L		slc30a6.S						wasf1.L	plekhm3.L	gatad2b
mapk1.S			grk3		slc39a9.L						rfwd2.S	dolpp1	mst1r.L
prmt5.S			syde2.L		rhog-like.1.S						ccdc64.L	inpp5b.L	stox2.L
galnt4.L			arhgef12.L								cxxc1.S	znf319.L	kpna2.L
wdr60.S			pou5f3.3.L								mier3.L	phf3.S	rufy3.L
slc35f5.L			picalm.1.L								tmem18.S	mastl.L	kat6a.L
katnbl1.S			spsb4.L								klhl8.L	pik3r2.S	cep192.L
sertad2			arhgef18.S								ppp1r14a.S	taok3.S	mfsd6.L
ccdc186			prr14.L								Xelaev18024710m	nol8.L	cyp17a1.L
bahcc1.S			spg21.L								samd4b.S	mgat2.S	svil.L
med13l.S			peak1.L								cog8.L	znf250.S	lrrk1.L
eif5a.S			casc4.S								fam161a.L	pard3.S	cxadr.L
def8.L			rlf.S								lnpep.L	lnx1.L	LOC108705473
tle4.S			mtus1								trappc8.S	jak1.L	panx1.L
lrr1.L			rabgef1.L								uap1.S	sestd1.S	grhl1.L
gm29884			sik2.S								pcdh1.L	abcf1.L	slc25a28.L
kiaa2026.L			smg8.S								tmem259.S	flna	wars.L
atf7.S			st3gal2.1.L								ubl3.S	LOC108711140	rps6ka5.L
zc3h6			kiaa0922.S								trerf1.L	ankrd52.S	znf143.L
casd1.L			tmtc3.L								MGC115291	rnf19b.S	lyrm4.L
vps26b.S			samd4b.L								chuk.S	ncoa4.S	pip5k1a
fam53c.S			ttc31.L								rnf11.S	mtx2.L	wdr62
npat.S			nemp1.L								rap1a.L	mgat1.L	mov10l1.L
znf577.S			dtx2.L								impad1.L	cebpg.L	crebbp.S
mllt4.L			pak4.L								cbx2.S	dctn4.L	plxna3.L
fez2.S			snx4.S								cep78.L	mreg.S	r3hdm1.L
ino80d.S			unnamed.S								znf234.L	nf1.S	camsap1
cttnbp2nl.L			e2f4.L								ppp2r5a.S	LOC108704624	gid8.L
trafd1.L			MGC79091								polr2f.L	neil3.L	slc25a25.S
cdc42bpb			LOC100127794.L								scyl2.L	pcyox1.L	ctnna1.L
spryd3.L			adgrl2.L								loc100489386.S	tns3.L	thg1l.L
cdc37l1.S			araf.S								rnf145.S	phrf1.L	tnrc6a.L
adamts6.S			wnk3.L								LOC108709941	stag1.S	nfat5.L
rnf44.L			sbk1.L								tank.S	smtnl2.S	tgif2.S
rcbtb1.S			gnpat.S								LOC108704268	spata2l.L	gas6.L
apaf1.L			nus1.S								appbp2.S	ikbkg.L	mief2.S
lrrc47.L			tnrc6c.S								nipa2.S	ell2.S	pkn3.S
pik3r1.L			usp46.L								pgam5.L	uap1.L	ckap5.S
dph6.L			top1mt-like.L								rad51.L	krit1.L	vsig10.L
ppp1r12a.S			dars2.L								zbed4.L	rad54l	pcgf3
rbm24.S			mast4.S								asxl3.S	irf6.S	wdr47.S
ccdc14			arhgap21.S								gmppb.L	slc25a44.L	kdm2b.L
mkl1.S			fam193b.S								mfsd1	arhgap35.L	dab2ip.L
efcab14.L			cdc42bpb.L								fam114a2.S	rragc.L	otud4-like.2.L
slc39a14.L			polg.L								kif1b.S	lcor.L	szrd1.L
vezt.L			atp8b1.L								pcdh1.S	psat1.L	vkorc1l1.L
wdr59.L			rnf169.L								znf26	arl15.L	tep1.L
ext1.L			rab8a.L								rasal2.S	acadl.L	klhdc10.L
r3hdm4.L			rictor								c12orf4.L	rnf41.L	rala.L
hdac2.S			slc39a10.L								krcc1.L	tdrd7.L	znf800.S
fgfr1.S			ccnb2.L								gnaq.L	cdkn2aip.L	LOC108719340
ranbp2.L			ppp1r37.L								stx16.L	rfwd2.L	nup58.L
cep85.S			pdzd2.S								wdr34.L	mtmr10.L	ccdc68.S
atat1.S			kmt2b								kbtbd8.S	spryd7.L	maml1.L
adgrl2.S			kpnb1.L								pard6g.S	snx9.S	zbtb21.L
cep57.S			cdkn2aip.S								snip1.L	nemp1.S	ankrd12.S
pik3r1.S			eml1								gtpbp2.S	prkaa1.S	gtf2a1.L
slc25a44.S			lbh.S								borcs7.S	rmnd5a.L	frs2.S
tbc1d14.L			c5orf24.S								aebp2.S	tubg1.S	nup133.S
hip1r.S			c16orf52.L								map4k4-like.L		ubn2
plpp6.L			dock4.L								LOC100158370		ccnb1.2.S
muc3a			phf14.L								ttbk2.L		tab3.L
sos1.L			mapk7.L								rnf130.S		usp8.L
ptpn21.S			akap1.S								cab39l.L		fam193b.L
jade3.S											gnaq.S		c3orf58.S
haus2.L											Xelaev18031388m		shroom4.L
gse1.L											git2		tmx4.L
nap1l4.S											tasp1.S		aff4.S
enc1.2.L											afg3l2		exosc6.L
gse1.S											efcab14.S		snx30.L
fzd6.L											usp42.L		spty2d1.L
ptpn12.L											dock7.S		entpd4.L
zfyve28.L											sec62.L		asap2.L
socs5.S											dbf4.L		abhd13.L
narf.L											oaf.L		haus6.S
apc.S											zbtb41.L		eri2.L
ccdc186.L											tmem209.S		exd2.L
sept8.S											sav1.L		cyth1.S
usp44.S											frrs1.L		fdx1l.S
bcl11b.S											fam73a.L		kiaa1210.L
sdhd.S											loc733735.L		slc12a6.S
pkd2.L											adpgk.L		rell1.S
hn1.S											ptpn23.S		chfr.L
abhd2.L											aamp.L		tle1
snx13.L											LOC108701166		cchcr1.L
smtn.L											bad.L		xpo4.L
morf4l1.L											srebf1.S		slc35d1.L
chmp1a.S											rev3l.L		itgb1.L
cdyl.L											clasrp.L		atad5.L
r3hdm1.S											arl8b.L		acsl4.L
tmem110.L											uso1.L		arfgap1.S
tanc1-like.S											azi2		csk.S
fam53a.L											rab27b.L		net1.L
pdik1l.S											mpst		capn5.L
mad2l1bp-like.L											cap1.S		ythdf3.L
arhgap35.S											b4galt5.L		ide.S
haus6.L											eloa		ctdsp2.L
mpp5.S											lin28b.S		tmem198.L
zbtb33.L											ddx19b.L		med26.L
rapgef2.S											ccnl1		homez.L
blm.S											bdp1.L
adnp2.L											fam102b.L
dsc3.S											chd8.S
fam83d.S											prdm10.L
rasef.S											med14.S
myo19.S											map3k10.L
elk4.S											sass6.L
ccnyl1.S											jmjd1c.L
tfe3.S											usp31.L
atl2-like.S											ccdc15.S
scyl2.S											sbds.L
disp1.S											msantd2
aak1.S											msl2.L
agap1.L											lemd3.S
arhgef17.L											mlxip.L
atg4a.L											ncs1.L
katnb1.L											tiam1.S
LOC108709196											ppip5k2.L
sik3.L											fmn2.L
tmem51.L											atrip.S
rlim.S											zyg11b.S
kmt2a.S											stk24.S
mtmr3											tdrp.S
MGC85120											ebag9.S
ubn2.S											wsb2.L
stambp.S											cdk8
mgll.L											plin3.S
ino80d.L											top1.2.S
nus1.L											dock9.L
taf4b.S											klhdc10
sipa1l3.L											tmem104.S
MGC115510											igf2r.L
wtip.S											kif21a.L
men1.L											stam.L
plxna3.S											ankrd28
mpp5.L											atrn.S
rnf112.1.S											bud31.S
ptcd2.L											adgra3.L
vps54.L											kif14.L
sh2b3.L											wdfy3
fam208a.S											lrrc16a.L
mtmr3.L											mier1.L
stk10.L											dstyk.S
scd.L											ap2b1.S
rasa1.L											aaas.L
prc1.S											dnaaf5.S
kdm4c.S											luzp1.S
rnf115.S											fitm2.L
jade3.L											arhgap11a.1.L
tcf7.S											hspbap1.L
katnb1.S											fez2.L
znf268											trmt13.L
lamp2.L											cask.L
ddx3x.L											rps6ka3.L
peli1.L											znf839.L
arhgap32.L											lhfpl2.S
aak1											smarcal1.L
fnbp1l											tbc1d12.L
											rapgef6.S
											gemin2.S
											kctd5.L
											nusap1.S

## Sheet: St10-10.5_Increase
List of Genes for all Overlapping Temporal DESeq Groups, corresponding with supplemental figure 3
All_Lineages	Epi-Meso-Neur	Epi-Meso-Endo	Epi-Neur-Endo	Meso-Neur-Endo	Epi-Neur	Epi-Meso	Epi-Endo	Neur-Meso	Neur-Endo	Meso-Endo	Epi	Neur	Endo	Meso
gata2.S	g0s2.L	ventx1.2.L	cfh.L	LOC108717899	gli2.S	dlx5.L	igfbp2	ccdc129.L	LOC108711733	Xelaev18002117m	gata2.L	gcm1.L	frzb-1	lamb1.L
col4a5.S	LOC100496293.L	foxi4.1.S	dock10.S	moxd1.S	efnb3.L	figf.L	pax3.L	myh6.S	LOC398451	chrna4.S	dlc.L	cndp2	cer1	trpv5.L
sspo.L	clcnkb	slc30a8.L	lrp2.L	otog.L	Xelaev18022564m	egfl6.L	nuak1.L	elovl3.L	otx2.S	capn8.2.L	szl.L	vtn.L	foxa2.L	gjc2.L
scnn1a.S	wfdc2.L	MGC52622	pkdcc.1.S	c22orf15.L	foxi4.1.L	kremen2.L	ventx1.1.L	nr1i3.L	myoc.L	muc1.L	msx1.S	rai2.S	cer1.S	slc26a9.S
ror2.L	elavl3	myo5b.L	Xelaev18003060m	fer1l4	chrna2.S	LOC108716735	rgs2.L	LOC108720014	Xelaev18002226m	mrc2.S	dbn1	Xelaev18002025m	rgs16.S	MGC147600.S
LOC108715896	wasf3	chst1.S	irx2.S	krt5.7.S	LOC100496797.L	fam212a.S	nptx2.S	LOC108698170	chgb.L	npnt.S	szl	Xelaev18040848m	ckmt1b.S	sh3d21.L
pkdcc.1.L	crb2.L	shroom3.L	unc93a.L	chrna2.L	onecut2.L	bambi.L	axl.S	Xetrov90002352m.L	crx.L	fam198a.L	zc3h12c.S	foxd4l1.L	darmin.L	anxa4.S
capn8.S	slco5a1.S	id4.S	guca1a.S	dennd2a.L	cdc14a.S	tll1.S	dll1.S	trpv6.L	LOC108698246	bmp7.1.L	dll1.L	hoxd10.L	lrrn3.L	c5.2.L
runx1.L	col8a1.L	LOC108704672	sgk1.S	cdx1.S	ltk	ptger4.S	msx2.L	LOC100497556.L	LOC108707019	MGC83169	fucolectin.S	LOC108699634	Xelaev18043356m	arhgap36.L
clca3.L	LOC100487499.S	pygm.S	znf608.S	LOC108698113	sst.2	gprc5b.L	gata3.L	rarg.L	otx2.L	eps8l2.S	arhgap6	abca5.L	LOC108712937	LOC108703849
sema6a.S	Xelaev18043700m	arhgef19.L	slc35d2	Xelaev18022168m	LOC108712518	ptk2b.S	tph1.S	fa2h.L	Xetrov90015964m.S	trim29.L	foxi1.L	pgs1.L	LOC108705045	cdx4.S
c3.L	col4a5.L	Xelaev18000128m	cebpd.S	arhgef3.2.L	olfm4.L	ccn1l.S	fam167a.S	gnb3.L	olig4.L	lef1.L	adcy4.S	LOC108715640	slc5a8.L	comt.2.S
itgb8.L	myc.L	lmo4.2.S	ltbr	ckap4.S	rflcii.L	fam212a.L	vcan.L	myb.S	ppp1r3e	hao2.L	ventx3.2.L	actc1.S	frzb.S	kremen2.S
map3k14.S	Xelaev18013398m	rreb1.L	ggt1.L	cdh1.S	dazl.L	myt1.L	hesx1.L	kcnk1.S	sytl2	slc6a8.S	foxi4.2.L	plcb2.L	spns2.L	ano9.L
afap1l2.L	kalrn.L	sox18.L	LOC108719506	lin28a.S	kcp.L	tmprss9.L	pdlim4.L	fcn2	LOC108697464	glipr2.S	fam167a.L	itga4.S	klrc4-klrk1	crabp2.L
scnn1a.L	c9.L	arhgap33.L	galnt7.S	upk2.S	sall3.S	pkp3.S	ventx1.1.S	clic3.L	prdm14.L	gata3.S	pde7b	rnf223.S	spns2.S	krt12.S
sds.S	cdx2.L	gfpt1.L	kiaa1324.S	krt5.7.L	LOC108710705	bambi.S	sema6a.L	ap1m2.L	LOC108704653	LOC108701721	sox18.S	LOC108707645	gata6.S	slc9a2
atp1b2	xepsin.L	Xelaev18012294m	sox9.L	kiaa1614.L	tex264.S	tll1-like.1.L	Xelaev18027269m	LOC108716397	pou6f1.L	cd99l2.L	smad7.S	parp6.L	atp1b4	MGC80993
elavl3.L	LOC108704223	lgals3.S	MGC82975	mars2	spsb3	atp12a	LOC108698800	slfn13.L	cfap58	epas1.S	p2ry2.S	aqp3.S	spry4.L	LOC100487224.L
map3k19.L	fam83c.S	hnrnpr.L	fgd1.L	znf608	dio3.L	mdk.S	stard13.S	loc108718659.S	tbx2.S	lox.S	gm39120	parp12	LOC108709890	slc25a4.L
azin2.S	txnip.L	slc7a8.S	mcf2l	fzd3.S	Xelaev18038622m	creb3l4.S	sox8.L	lrig1.L	cebpa.S	znf474.S	meis2.S	tmem56.2.L	bpi	gli3.L
fblim1.L	ccdc68.L	pcdh19	arl4a.S	emp2.S	cfap206.L	ifnlr1	slc7a11	nxpe3l.6.L	hs3st3a1.L	vgll4l.S	aifm3-like.L	krt8.2.L	ntrk1.L	msx2.S
fgd1.S	arhgef3.1.S	map3k1.S	acod1	spred1.L	ugcg.S	grhl3.L	ventx2.1.L	LOC108708225	slc4a1.S	ablim1	pcdh18.L	Xelaev18000594m	adamts15.L	ventx3.2.S
myt1.S	evpl.L	Xelaev18003957m	LOC108698354	LOC108701422	klf9.L	LOC108715136	ventx2.2.L	MGC68910	muc17	cdon.L	slc9a3r2.L	fam169a.S	LOC108707266	fermt1.S
scube2.S	dlx5.S	notch1.L	cdk5r1.L	ccnb3.S	LOC108702458	hdac7.L	nav2.L	s1pr5.L	pts.S	LOC108717200	insm1.S	irx3.S	slc16a7.L	LOC108703841
trpm8b.L	gprc5cl1.L	fam193a.L	entpd2.S	LOC108719253	vgll4l.L	rhou	atp1a3.L	mid1ip1.S	krt.L	xdh.S	lrrn1.S	emilin1.L	runx1t1	tmem265.S
cfb.L	dennd2c.L	LOC108706094	irg1.L	top2b.L	ranbp3l.L	hexim1.S	tbc1d24.2.S	loc100497729.L	casp7	dlx3.L	rab11fip4	LOC108705860	tmem150b.S	gnb3.S
hsp90aa1.1.L	pdk4.L	pcbp2.S	efnb2.L	rbms2.S	msi1.S	gas2l1.L	runx1	znf282	lhx3.S	LOC108715654	MGC76328.L	LOC100486385.L	ca7.L	degs3.L
LOC108699553	klf10.L	rreb1.S	prnp.S	upk3b.L	myo9a	nrarp	zswim4.S	stard10.L	socs4.L	LOC108713946	rgmb.S	stoml3	hoxa9.L	LOC108699767
trim67.S	sptbn4	ccnd1.L	admp2.L	march8.L	sp6.L	ier5l.L	itga6.L	sds.L	hoxd9.L	trabd2a	tbkbp1.S	ddit3.S	vcan	dlx3.S
tmem265.L	rhebl1.L	scube2.L	acod1l.L	LOC108710853	fosl2.S	hspbp1.L	ventx1.2.S	gprc5c.L	syt10	vash2.S	foxi4.2.S	kif1a	thsd7a.L	hsd11b1l.L
cyp27a1.L	prkx.L	id3.S	rnf223.L	muc5b	cnfn.1.L	prickle2.L	txnip.S	LOC108698063	fosl1.S	Xelaev18001656m	dnmbp.L	foxn4.L	LOC108715064	arid3a
il16.L	stat3.2.L	kcnk5.S	efnb2.S	LOC108701168	MGC82544	post7p.L	kit.L	krt.S	aacs.L	clcf1.L	dlx2.S	abcc8	tmprss2.14.S	tead4.L
klf10.S	LOC108710017	gfpt1.S	tgif2.L	erbb3.L	cxcl10.L	cdc25b.L	Xelaev18011097m	LOC108696785	crx.S	mab21l3.S	lfng.L	umod	st6galnac4	plcd3.S
celsr1	creb3l2.L	Xelaev18009838m	sh3bp4.L	uqcrq.S	foxj1.S	march7.S	pcdh7.L	arg2.S	Xelaev18000483m	Xetrov90014299m.L	was.L	il10rb.S	igf2.S	lrrn1.L
arl8a.S	ralgds.S	id3.L	vwa5a.L	st6galnac2.L	slc25a34.L	mxi1.S	cd99l2.S	fbp1.L	dusp11.2.L	ttc34.S	map3k13.L	st3gal5.L	gpx3.S	atp1b2.S
sacs	alcam.S	LOC108706543	tfcp2l1.L	napb	birc2.S	herpud1.S	tnip2.S	pim1.L	atf3.L	menf.1.L	smad7.L	LOC108697411	LOC108696302	dlk2.S
slc25a29.L	serpinh1.S	arhgap39	cass4.L	cdk1.S	lsm14b.L	myl9.L	LOC108711841	LOC108703754	mn1.L	fam83c.L	Xelaev18017221m	cyp27b1.L	dmbx1.S	LOC108709519
robo3.S	prss8	eif4a2.L	rbm14.L	1700037h04rik	arnt.S	rpl26.S	ventx2.1.S	LOC108698396	LOC108712218	elf1.L	hdac11	fam3b.S	Xelaev18043812m	dlx6.L
sulf1.L	ptch1.L	LOC108715172	prelid1.S	upk1b	timp3.S	dynll1.L	LOC108698352	cdknx.L	fzd8.S	ednra.S	fabp3.S	sptbn5	irx3.L	hpgd.S
sbno2.L	arrdc3.S	smad4.1.L	litaf.L	LOC108695521	gsk3b.L	rps21.S	lypd2.L	znf653.L	LOC108719541	c14orf37.L	id2.L	LOC108708942	egr1.L	ecm1.S
LOC108706318	dedd2.L	esr-5.L	hist2h2ab.S	plekhn1.L	fth1a	aim1.S	slc2a1.L	rnf135.L	ccnd1.S	atp8b3.L	Xelaev18034047m	heg1.S	ptger4.L	smc2.S
proser1.S	plk2.L	hhip.L	fosl2.L	Xelaev18017186m	cltc.L	LOC108708564	itprip.S	gmps.L	ras-dva1.S	xk81a1.S	hes4.L	Xelaev18036730m	bcl11b.L	wif1.L
apeh.L	xicl	rbm12.L	loc108648340.L	fzd2.S	LOC108696887	LOC108709832	efna1.L	xpnpep1.L	angpt4.S	lct.1.L	rasd1.S	arl6ip1.L	anxa6.L	trim29.S
plcd3.L	pars2.L	e2f7.L	actb.S	cldn4.L	socs3-like.1.S	gm20188	LOC108698461	slx4.L	pcdh8l.S	nxpe2p1	abca1.L	LOC101733073.L	Xelaev18032309m	nxpe2.L
sgk1.L	herpud1.L	lrp10.L	vezf1.S	znf740.L	ptma.S	awat1.L	pcdha13.L	grx5	LOC100489887.L	LOC108713701	mafb.L	cckar.L	Xelaev18039313m	smad6.2.L
cyp27a1	unknown.S	phldb3.S	wee1.S	amotl2.S	unkl.L	rps12.L	notch1.S	rabgap1l.S	plekhn1.S	plxnb1.L	abca1.S	tfap2e.L	gata4.L	cfp
plekhs1	slc7a5.L	isg20l2.S	cbx5.L	sf3b5.S	gla.S	mkrn2.L	mlec.L	mknk2.S	nxpe4.S	pou5f3.1.L	fgf8.S	col4a1.L	fkbp7.L	trim68
alpl.L	rabgap1l.L	hexim1.L	capzb.L	creb1.S	ssfa2.L	MGC81028	Xelaev18001619m	LOC108698339	il6st.S	LOC108705899	bbip1.S	aqp4	gata6.L	LOC108706875
LOC108715348	dgat1.L	sertad1.S	slc2a1.S	Xelaev18024458m	smg1.L	rps27a.S	gadd45a.L	atp1b1.S	n4bp3.L	gatm.S	sptbn5.L	gpd1.L	trpm4.L	tnfsf10l.L
LOC100495010.S	upk1a.L	prom1.L	pin4.L	LOC108707322	irx2.L	rpl36a.S	MGC81482	eif4a1.L	cebpa.L	LOC108716734	loc100487575.L	LOC108698034	Xelaev18035430m	cfp.L
arrdc3.L	ubb.L	loc728026.L	calr.L	hes3.1.L	sec14l1.L	kbtbd7.L	btg1.L		itprip.L	st3gal1.L	tox3.L	rasgrp2.L	dnah6	rasal1.L
mst1.L	hmgn3.L	unc50.S	u2af1.S	midn.L	spata13.S	rpl37a.L	csrnp1.L		zfand5.S	LOC108708348	rhou.L	tuft1.L	LOC108697541	lsp1.L
socs3-like.1.L		pou5f3.2.L	sf3b2.S	rbmx.S	LOC108718087	rpl36.S	ctps1.L		LOC108711579	rai14.L	s100a2	LOC108714578	st6gal2.S	specc1l
mxi1.L		akap2.S	fxyd3	zfp36.S	sbno1.L	eif1b	ago2.L		prkcd	gatm.L	timp3.L	MGC86547	fn3k.L	pvrl3.S
crocc.L		hspa8.L	ppig.L	fbxo5.L	fam32a.L	h3f3c.L	fam110c.L		yrdc	ahnak.S	fdps.L	LOC108704569	MGC86526.S	ablim1.S
pdgfa.L		znf740.S	glul.S	trpv6	krt8.S	MGC84691	LOC108710532		wee2a	traf4.S	klf5.S	pnliprp1	trim50.S	amotl1.L
fzd2		kirrel2.L	odc1.L	rassf7.L	gldc.S	h3-5.L	Xetrov90029963m.L		LOC108714507	LOC494849	vasn.S	olig4.S	LOC108705470	irak2.L
kiaa0232.S		phldb3.L	arf4	LOC108704423	rbm8a.L		rps3a.L		sdc4.L	arl4c.S	vim.L	ror1.S	LOC101027296	nr1i3.S
dhx58.L		ppp1r8.L		rbm5.L	erh.L		pou5f3.2.S		pou5f3.1.S	has-rs.S	Xelaev18006061m	ldlr.S	loc100494211.S	cenpv.L
lin28a.L		hspa8.S		tmem79.S	MGC80893		ahnak.L		fam46a.L	ank3	sbno2.S	pax3.S	ntn3.S	mmp14.L
tubb2b.L		tra2a.S		b3gnt2.S			noc4l.S		tubb4b.S	lrrc56.L	stx8.L	bhlhe40.L	LOC108703288	rab25.L
lsp1.S		rpl26.L		eef1a1.L			rpl17.L		arhgap29.L	fgfr2.S	erbb3.S	fam83f.S	foxd4l1.1.S	fcgbp
ervfrd-1		plekhg3.L		hnrnpa1.S			atp1a1.L		pmm2.L	LOC108696320	hist1h2aj.L	LOC108713742	wnt8a.S	Xelaev18024078m
trarg1.L		rps4		rnd1.L			hp1bp3.L		f3.L	st3gal1.S	abcb5	ubp1.L	mig30.S	LOC108709568
rbms2.L		parp1.L		upk1b.S			LOC108695506		LOC108699904	golm1.L	gadd45g.L	plat.L	Xelaev18034439m	znf185.S
tubb4b.L		rpl7.L		LOC108717895			hnrnpa0.L		jun.S	LOC108700767	zfhx3.L	MGC84460.L	bmp7.1.S	cyp1a1.L
zswim5		mcl1.L		zhx1.S			srrt.L		aasdh.L	cerk	gfod1.S	hcn4	LOC108705469	arhgef3.2.S
fth1.S		hmgn2.L		LOC108709393			mapre1.S		ngfr.S	st6galnac2.S	fgd4.L	helz2	synpo.L	LOC108715890
mig30.L		MGC83421		tuba4b.S			mzt1.S		LOC108697537	cnn1.L	sh3bp5l.L	hipk2.S	Xelaev18023152m	prph.L
gpr143.L		ubc.L		top2a.L			snrnp200.S		LOC108704510	caprin2.S	lamc1.S	cish.S	zic3.L	elmo1.L
ras-dva1.L		hmg-17		hnrnpa1			ppp1cb.L		krasl.S	fhl3.L	grpel2.L	ig100492381.L	LOC108698145	fsbp
tuba3c.S		rps2		rfng.L			rpf1.L		actg1.L	znf268.L	cox7c.S	arhgap25.S	gata4.S	ctsz.S
kitlg.L		rpl37.S		Xelaev18042112m			loc100494818.L		tsc1.S	Xelaev18038969m	rps9.L	pxdc1.L	dleu7	xbp1.S
LOC108713945		rpl31.L		rpl23.S			sptan1.S		auts2	pvrl1-like.2.L	cpne3.L	hsf3	LOC108719432	tead4.S
slc7a5.S		rpl7a.S		rfx2.L			mtmr12.L		ppp1r10.S	prdm1.L	svbp.S	cebpd.L	gabbr1.L	tuba1cl.2.S
itpka		srsf2.S		myef2.L			xvent-2b		plekhg1.L	emp2.L	dyrk3.L	cdx2.S	Xelaev18016122m	muc5ac
LOC100490918.L		eif5a.L		prmt1.S			sumo2.L		rnf38.S	xk81a1.L	pbx1.L	pcdhga2	t.L	dgka.L
LOC108695513		gtpbp4.L		hnrnpdl.L			rpl15.L		m6pr.L	sncb.L	wdr43.L	col4a6.L	flnc	loc108703073.S
apoc1-like.L		psmd1.S		upk3a.L			spint2.L		ubap2.S	Xelaev18001991m	dzip1.L	cxorf21.S	egr1.S	Xelaev18004347m
mypop.S		rpl17.S		MGC52578			anxa7.L		cldn6.1.S	LOC108719518	tubb.L	zic4.L	Xelaev18034008m	gli1.S
cass4.S		msl1.S		atf4.L			vapb.L		rbm5.S	rpe65.S	kdm2a.S	krt18	kcnk6.S	lmod1.S
otud1.L		cwc25.L		etaa1.S			prpf8.S		ccnf.S	slc45a3.L	faxc.L	cnnm1.L	Xelaev18002940m	bspry.L
zswim5.S		hdlbp.L		hnrnpk.L			dhx29.L		ubb.S	rbl1.S	tmem111.L	irf8.S	LOC108696274	zfp36.L
znf451		tpt1.L		hmgn3.S			gatd3b		leng8.S	kcnk5	pmel.S	c17orf58.L	dmpk.L	LOC108695829
LOC100127323		supt5h.S		h2afz.L			gltscr2.L		ankrd50.L	LOC108715137	anxa4.L	card9.L	aim1l.L	fmc1.L
rap2b.L		fkbp1a.S		prmt1.L			wbp11.S		kif11.S	has1.S	luc7l2	slc16a6.S	Xelaev18035048m	slc6a16.L
top2b.S		elob		tmpo			tuba1c.L		sgk223.L	arg1.L	rps19.S	lypd6.L	pnhd.L	htra1.S
tsc22d3.L		u2af2.S		smarce1.S			smarcc1.S		irs4.S	LOC108718254	mdk.L	plekhf1.S	LOC108708585	cpm.L
tceb3.S		smarce1.L		hnrnpdl.S			ran.S		ptgs2.L	tiparp.L	arpc5l.L	Xelaev18009606m	cthrc1.L	slc22a4.L
lrrc75b		dcaf7.S		npm1.L			pmpca.S		ptgs2.S	Xelaev18008693m	rplp2.L	Xelaev18009532m	sox10.L	slc2a2.L
ist1				hnrnph3.L			aplp2.S		epha4.L	Xelaev18003954m	sec61g.L	gpr65.L	t.S	tmem163.S
hpgd.L							smarcd2.L		rnd1.S	MGC80567	rps20.S	gpr65.S	cdh24.S	c2cd2.S
fgfr2.L							hnrnpab.S		pvrl2.L	LOC108715368	rps5.L	bcl3.L	a2ml1	capns1.L
melk.L							uba1.S		epcam.L	LOC108703380	loc100135138.S	myom1.L	Xelaev18030919m	mboat1.L
ptma.L							smarcc1.L		epcam.S	LOC108708517	sec61a1.S	Xelaev18008189m	carmil3	vangl1.L
zmcm3.L							spint2.S		MGC115598	zmiz2.S	rps5.S	shbg.L	rgs20.L	ccnb3.L
ralb							ddx21.S		myl12b.S	Xelaev18003895m	otud6b.L	il10rb.L	sidt1.S	uts2r
khdc4							sf3a1.L		aqp11.L	nynrin	LOC108695696	cish.L	Xelaev18028207m	fam198b.L
lrig2.L							rnf10.S		tbcd.L	post.L	rps8.S	dst	Xelaev18004081m	adap1.L
srsf7.L							nat10.L		pabpc1.S	tmem127.S	rpl7a.L	flt4	LOC108704696	znf750.S
loxl1.L							mta2.L		xnf7.S	nudt22.L	rpl10a.S	LOC108717350	pitpnc1l.L	pkn1.L
atp6a1							znf638.L		krt8.L	cdca3.L	cpsf1	LOC108697654	mnx1.S	fsbp-like.L
cfap52.L							hnrnpul2.L		nucks1.S	cnn1.S	zcchc9.L	socs2.L	foxd1.L	LOC108699910
rbl1.L							carm1.L		khdrbs1.L	mplkip	snrpd1.L	foxc2.S	slc34a2.L	psmg3.L
alcam.L							mfap1.L		pitrm1.L	lrwd1.L	hsp90ab1.S	ldlr.L	Xelaev18028209m	ag1.L
pabpc4.L							rnps1.S			cmtm8.L	txnrd3.L	upp2.L	loc100490316.L	post3.S
actb.L							fxr1.S			znf462.S	ncapg.L	rnd3.L	mmp1.S	post5.S
e2f8.L							ddx46.L			hal.1.L	rpl23a.L	arg2.L	cnrip1.L	lsm4.L
eef1a1o.S							rnf10.L			prss36.L	glul.L	cldn5.S	asb9.L	itga3.L
egln3.L							sec23b.S			pgbd4	rpl13a.S	bag3.S	pnhd.S	rassf6.S
slc7a3.L							znf207.S			lrp10.S	hnrnpll	ampd3.L	nrp2.S	tfap2a.L
mcm6.2.L							gtf2f1.L			ckap5.L	eif4g2.L	LOC100036994	LOC108700903	nectin4
pcf11.S							thrap3.L			frmd4b.S	naa20.S	col9a3.L	apcdd1.S	grhl3.S
brd2.S										LOC108696061	dhx9.L	ptprj	sebox.L	abcb1
e2f3.L										Xelaev18022009m	ddx47.L	gata5.S	foxe1.S	b4galt5.S
asb7.L										a2m.S	ppia.L	dgki	Xelaev18039952m	esco2.S
zfand5.L										hdgf.L	ahcy.L	LOC108695812	chrd.2.L	arhgef2.L
efna1.S										cbx1.S	rpl18.S	LOC101243550	pcdh8.2.S	LOC108701134
hspg2.L										zc3h10.L	pdcd6ip.L	alk	LOC108720035	LOC108701666
nradd.L										Xelaev18038498m	fam168a.L	foxd3.L	pip5k1b.L	znf750.L
atf4.S										rbm45.L	ndrg2.L	nhs.L	LOC108715287	cdk1.L
e2f7.S										fgd4.S	dpp3.S	srpk2.S	litafd.S	LOC108715416
mlec.S										akap2.L	snrpb.L	rbbp8nl.L	fli1.S	pygm.L
cables2.L										sh2d3c.L	psma7.L	LOC100489607.1	c10orf71	yeats4.L
ppp1r10.L										zc3h10.S	med6.L	tnik	cpz.L	upk1b.L
map3k1.L										sapcd2	serf2	akap6-like.S	shox2	zfp36l1.S
srsf7.S										srsf2.L	rpl18.L	dnai2.S	pdgfra.S	rab11fip4l.L
tra2a.L										hmgn1.S	eif3m.S	nfe2l2.L	Xelaev18023478m	nlrc4.L
dido1.L										LOC108702825	sqstm1.L	rap1gap.L	loc100494211.L	post10.L
znf101										sfpq.L	u2af1.L	tmem238.S	admp.S	dlx6.S
sppl3.L										LOC108698564	psmd13.S	suox.S	Xelaev18015877m	nrarp.S
znf592.L										rbmx.L	rbbp7.L	LOC105945479.S	wfdc1.L	rnf225
rps2.L										efna4.L	snrpd2.L	tfec	cux2.L	dgkd-like.L
fbxl20.S										rhob.S	pbrm1.L	pcdh8l.L	dnase1l3	plekhg3
ints6l										rdh10.L	bcas2.L	Xelaev18039754m	LOC108708252	stx19.S
cdc34.S										hes3.1.S	wdr74.L	LOC108716727	arhgef28.S	slc35a2.S
prdm15.S										isg20l2.L	gar1.S	mvp.S	mertk.L	zfp36l1.L
ctps1.S										pxmp4.L	dnaja2.L	gch1.L	Xelaev18011486m	scaf4.L
rap2b.S										gs17.L	ncoa5.S	Xelaev18004563m	kctd7.L	tat.S
hnrnpl.L										Xelaev18001896m	rpia.L	tgif1.S	foxd4l1.1.L	emg1.L
ilf2.L										mpzl1.L	eif3g.L	prdm14.S	iqca1.S	tmem79.L
hist2h3d.L										tpd52l2.S	eif2s3.S	armc1	snai2.S	tspan13.L
psmc5.L										LOC108709581	znf605.S	gpr4.S	shank2.S	cks1b.L
										utp15.S	las1l.L	tcim.L	scn2b.L	trpv2.L
										bmp7.2.L	snrpc.S	cttnbp2.S	LOC108698356	plxnb1.S
										Xelaev18024066m	f11r.L	alg14.S	emilin2	Xetrov90029311m.S
										setd5	LOC108709949	ranbp3l.S	slc5a8	tcf7l1.S
										cenpc.L	eif3d.S	znf703.L	cnksr1.S	rbm47.L
										prpf39	ddx39a.S	egln3.S	gramd1a.S	map2k6.L
										metrnl.L	eif3i.L	hap1.S	myh6.L	Xelaev18003558m
										Xelaev18001443m	ewsr1.L	LOC108704231	dysf-like.L	ddx28.L
										aurkb.L		LOC108718942	adam33.L	rnf222.S
										psmg1.L		flrt2.S	st3gal5.S	ube2n.S
										prpf39.1.S		slc16a6.L	LOC108700066	xrcc1
										c1orf198		prrt1.L	crp	tsc22d1.L
										nsep1		atoh1.S	LOC101732807.L	rarg.S
										cirbp.S		jund.S	stx1b.L	nadk2.S
										cirbp.L		parp12.L	sox9.S	b4galt3.L
										prc1.L		LOC100486385.S	LOC108700085	LOC108700281
										LOC100505446		mbd6.L	naalad2.S	slc17a9.L
										atp1b3.L		btg2.S	nptx1.L	slc7a4.L
										hmgb3.L		dydc1.L	ndnf.L	midn.S
										utp15.L		bcorl1.L	znf385c.S	chd2.L
										plk4.L		itpr3	LOC108715350	cdca4.S
										wdr83os.L		entpd2.L	LOC108697754	chst2.L
										slc25a17.L		crebl2.L	onecut2.S	rbm12b.L
										mcm6.2.S		maff.L	cdk15.L	hsp70.L
										sh3bp4.S		nr2f6.L	mctp1	gpatch8.S
										hmgn1.L		vim.S	gdf3.S	btbd10.S
										hmgb2.S		Xelaev18026162m	Xelaev18039582m	rpl34.S
										MGC81970		LOC108709387	kiaa1217.S	selk.S
										luc7l3.S		Xelaev18006613m	tbx3.L	rfx2.S
										wdr12.L		LOC108699848	insm2.L	nipal4.S
										tm9sf3.S		Xelaev18001646m	mixer.S	sox15.L
										hnrnpu.S		LOC108696832	foxp2.S	chd3
										ccnt2.L		nox1	shh.S	leprotl1.L
										anp32c.S		ttf2.S	LOC108698222	cpt1a.L
										LOC108712538		pik3ip1.L	kcnk6.L	rps7
										hnrnpa2b1.L		map1lc3b	wnt8a.L	bola2.L
										khdrbs1.S		mpzl1.S	kctd12.L	il17rd.L
										rpl9.L		pcdh8.S	fbln1	rps9
										sptan1.L		mtx1.S	Xelaev18026908m	bcorl1.S
										erbb2.S		cebpb.S	admp.L	oxr1.L
										ybx1.S		mnt.L	lef1	kiaa0101.L
										nfkbia.L		mybl1.S	LOC108714284	uqcr11
										myef2.S		maff.S	mrc2.L	rps23.L
										mcrs1.S		MGC82989	hoxc10.L	gas2l1.S
										rps6.L		fam3b.L	afap1.S	rpl38.S
										hnrnpa2b1.S		atf3.S	hdac9.S	rpl10.L
										h3-3b		acta2.L	LOC100495222.1.L	esrp1.L
										rbm4b.L		nat9.S	rnf165.S	ino80b.S
										nipal2.L		bmi1.L	LOC108701090	taf12.S
										rps3.S		jun.L	loc446281.L	nop16.L
										lig3.L		gramd3.L	Xelaev18038469m	rps13.S
										luc7l2.S		cldn23	ccn2	nop10
										cdk9.L		hic2.S	Xelaev18020658m	gprc5c.S
										nol6.L		irf1.L	xenf	slc35a2.L
										slc25a5.L		kiaa0232.L	a2ml1.L	LOC108701852
										tjp2		znf703.S	LOC100144987.S	rps25.S
										gnb2l1		cdpf1.L	ptprr.L	pde3b
										poldip3.L		sox2.L	LOC108705994	elovl7.L
										jup.L		efna3.L	itih3	rpl28.S
										ddx39		znrd1.L	tlx3.L	smim19.L
										trim25		smox.L	rgs1.L	rpl18a.S
										plrg1.S		slc25a28	LOC108705531	sf3b6.S
										snrnp70.L		socs1.S	LOC108696475	sem1
										api5.L		lhx5.L	akap12.L	pcna.L
										nsa2.L		efcab1.S	kcnh4.S	rps28p9.L
										hnrnpab.L		kif11.L	pou4f1	rhbdd2.S
										ccdc12.L		net1.S	antxr2.S	rps7.S
												pcdh20.L	rhcg.L	hras.L
												cldn4.S	nrp2.L	rgma.S
												hist1h3g.L	Xelaev18011724m	rps28p9.S
												spag9.S	hoxc9.L	hdgf.S
												cramp1.L	slc6a13.L	arl1.L
												nuak2.L	rorc.S	hif-1a
												vgll4.S	kcnj9.S	ywhae.L
												slc16a12.S	gsc.L	slc16a3.L
												cox18.L	pdgfra.L	sap18.L
												bace2.L	LOC108708812	rpl22.S
												ncstn.L	Xelaev18005924m	rps18
												dynll1.S	tnni3k.S	usp5.S
												foxo4.L	fgf16.S	apex1.S
												actg1.S	hhex.L	brix1.S
												gmeb1.L	Xelaev18008648m	dnajc19.L
												ddias	osr1.L	ftmt.S
												rpl8.L	eps8l2.L	tnpo3.S
												fam46a.S	rap1gds1
												arhgap29.S	Xelaev18017910m
												rbm34.L	iqch.L
												Xelaev18003796m	lmo1
												btbd7.L	fli1b.L
												polm.S	efs.S
												ip6k2.S	fam92b.S
												cep170b.L	sox17a.S
												zfand4.L	Xelaev18016253m
												mettl17.L	dkk2.L
												lhx5.S	slc38a4.L
												ptp4a2.L	ehbp1l1.S
												ddit4.S	LOC108699863
												sox11.L	cspg5.L
												atp6ap2.L	rem1.L
												fkbp1a.L	LOC108704183
												susd6.L	rasgef1b.L
												rpsa.L	camk1g
												slc25a28.S	LOC108700087
												trim36.S	pkdcc.2.L
												znf10	Xelaev18012293m
												zbtb2.S	efs.L
												gng7.L	tbx18.S
												dnajb1.L	f2rl2.L
												slc27a3.L	LOC108706925
												nfrkb.L	plekhg5.S
												tgif2.S	ntn3.L
												cdk2.S	hhipl1l.L
												rps3.L	lancl3.S
												blzf1.L	mmp11.S
												mknk2.L	ppp1r16b.S
												loc100049121.L	map3k12.S
												prickle1.L	slc16a9.L
												arid4a.L	prss27
												upf1.L	cpe.L
												nuak2.S	ccdc83.L
												igf2bp3.S	lrig3.L
												tfg.S	cnksr2
												LOC108702848	LOC108704005
												eif3f.S	stx3.L
												hsbp1.L	Xelaev18003524m
												ddx51.L	LOC108699675
												ppp1ca.L	mixer.L
												cpsf3.L	kiaa0895.L
												ilf2.S	rhpn2.L
												c19orf24.L	Xelaev18005585m
												snrpd3.L	LOC108714930
												rhoa.L	tnni1.2.L
													phox2a
													phox2a.S
													numbl.L
													adamts1.L
													fgd1
													Xelaev18001956m
													LOC108708347
													LOC108709611
													egr2.L
													tbx20.L
													scnn1gl.L
													dtx4.L
													snai2.L
													itgax.L
													LOC108701162
													tmem119.L
													slc16a10.S
													cdc42ep4.S
													f3.S
													lgr5.S
													tmprss9.S
													mrc1
													Xelaev18033647m
													fzd7.S
													nat8l.S
													adamts10
													kif26a.S
													flt1.S
													tyr
													LOC108709398
													LOC108700025
													zeb2.L
													myh7
													LOC108698355
													Xelaev18042341m
													myoc.S
													LOC108700617
													b4galt1
													cml
													slc1a7.S
													rerg.L
													cxcr4.S
													dpysl4
													rfk.S
													zic5.S
													txnrd1.L
													dkk1.L
													fgd5
													lhx1.S
													nrsn1.L
													LOC108704973
													hand2.S
													cnih3.L
													tmem47.L
													LOC108709763
													hivep3.S
													osr1.S
													Xelaev18011386m
													LOC108719633
													chrna1.L
													mybpc2.L
													fam3d.S
													atp6ap1.1.S
													pcdh8.2.L
													wnt6.L
													rusc2.L
													ces2
													fbln1.L
													ror2.S
													pkp1.L
													evx1.L
													lgals4.L
													amotl2.L
													wnt16.L
													cmtm5.L
													LOC108712665
													cd81.L
													rec8.L
													LOC108719085
													LOC495206
													pdp2.L
													pkdcc.2.S
													stox1.S
													mug2
													Xelaev18032866m
													MGC79993
													nts.S
													prr5l.L
													LOC108704612
													fgf3.S
													tbx2.L
													Xelaev18021866m
													Xelaev18028212m
													nell2.S
													LOC108696914
													spry2.L
													cdc42ep2
													plxna4
													1a11.L
													rorb.L
													srrm4
													slc38a2.L
													tbx1.S
													syn2.S
													egr4.L
													Xetrov90028231m.L
													Xelaev18028211m
													myrf.S
													LOC101733888.L
													flrt3.S
													maob.L
													Xelaev18044137m
													Xetrov90029923m.S
													lpar2.L
													ryr1
													atp13a-like.S
													efhb.L
													agr2.S
													kif5c
													fos.S
													sgk223.S
													tmprss4.L
													c20orf96
													val.L
													sez6l.S
													dhcr7.S
													syne3.L
													pou3f1.S
													fgf16
													LOC108698349
													enpp2.L
													LOC108710968
													kdr.S
													nr4a1.L
													gsc.S
													Xelaev18017809m
													ptch2.L
													LOC108699891
													lpar2.S
													slc39a8.L
													rbm20.S
													mix1.S
													rasip1.L
													anpep.S
													lamb3.S
													LOC108710827
													greb1.L
													Xelaev18038470m
													Xelaev18029191m
													Xelaev18017777m
													Xelaev18006569m
													Xetrov90026715m.L
													lama5
													LOC108704220
													Xelaev18024765m
													chst3.L
													dusp6.S
													LOC108704613
													hsd17b6
													LOC108710290
													stum
													Xelaev18010252m
													wnt11.L
													LOC108718164
													draxin
													hoxc10
													foxa4.S
													pmepa1.L
													lgi4.L
													lrig3.S
													LOC108701312
													Xelaev18006002m
													ca14.S
													aatk.S
													gjb2.L
													gne.L
													pitx3.L
													LOC108700036
													fgfrl1.L
													cabin1
													abca8.L
													LOC108713121
													mapre2.L
													nuak1
													Xetrov90015528m.L
													LOC108708446
													LOC108712674
													plekhg5.L
													Xelaev18001689m
													LOC108705533
													LOC108709502
													nedd4l
													npy2r-like.1.L
													snap91.S
													zic5.L
													rev3l.S
													usp43
													akap12.S
													pnck.L
													nkx2-5.L
													chl1
													loc495835.L
													pmepa1.S
													LOC108697063
													onecut3.L
													ppp1r18
													ccng1.L
													vstm2b.L
													nefl.L
													fos.L
													LOC101731753.L
													tmcc1.S
													notch2.L
													nrip3.S
													Xelaev18026940m
													nfkbiz
													Xelaev18000337m
													epn1.S
													LOC108698245
													LOC108701822
													LOC108705022
													klf5.L
													kit.S
													Xelaev18002446m
													tbx6
													Xelaev18043506m
													Xelaev18008846m
													chrd.L
													map2.S
													aplnr.L
													dusp1.S
													fzd7.L
													Xelaev18016751m
													Xelaev18015899m
													LOC108706704
													rassf9.S
													ago2
													Xelaev18012280m
													pcdh18.S
													fzd6.S
													fam43a.S
													ccdc141.L
													fhdc1.S
													kcnab3.S
													hao1.L
													lhx1.L
													itga6.S
													gss.L
													Xelaev18034023m
													LOC108706156
													Xelaev18010420m
													dennd2c.S
													fgf20.S
													tmem145.S
													LOC108700186
													LOC108704134
													chrd
													tmem255a.L
													LOC108708505
													fam174b.L
													plk3.L
													LOC108704219
													heg1.L
													tprg1l
													Xelaev18036963m
													LOC108707237
													celf4.L
													tox2.L
													klhdc8a.S
													ano5.S
													fpgs.S
													LOC108698417
													Xelaev18000237m
													pear1.L
													pou3f1.L
													smc4
													Xelaev18002673m
													Xelaev18026939m
													hoxd9.S
													LOC101733813.1
													zfp36l2.L
													lpar6.S
													Xelaev18004736m
													xhoxc8
													tmprss9
													ankrd24.L
													aldh1a2.L
													LOC108703375
													myo5c.L
													pcdh7.S
													LOC108705740
													trpm4
													ngef.S
													ca14.L
													foxa4.L
													nek6
													slc16a5-like.S
													mettl7a.L
													trpc6.L
													loc100496061.L
													tfr2.L
													hunk.S
													lama3.L
													Xelaev18037263m
													igfbp4.L
													gja5.S
													dleu7.L
													Xelaev18038471m
													LOC108712221
													kiaa1324l.L
													spry4.S
													prtg.S
													Xelaev18035105m
													sall1.L
													sox17a.L
													tmem158.S
													pnpla7.L
													LOC108704127
													zswim4.L
													LOC108718887
													Xelaev18018260m
													LOC108697415
													fbn3.L
													pced1a.S
													tsku.S
													kmt2a.S
													krt16.S
													bcar1.L
													eaf1.S
													mmp14
													styk1.S
													homeobox100496651-provi
													sema4a.S
													MGC81393
													Xelaev18016829m
													lama5.L
													bnip2
													sox17b.1.S
													ptpro.L
													LOC108705810
													fth1.L
													commd3.S
													kcnq1
													mix1.L
													bmpr1b.L
													muc1.S
													arhgef40.S
													myod1.S
													stox1.L
													kirrel2.S
													slc18a1
													spred1.S
													stard13.L
													hsh2d
													rab34.L
													zic1.L
													dlc1.L
													LOC108708391
													spry2.S
													tmprss2.11.L
													LOC108702593
													LOC108718316
													wnt5b.L
													vegt.L
													p2ry11.S
													ptpn14.L
													dhcr7.L
													LOC108709649
													galnt18.S
													Xelaev18010896m
													LOC108700092
													Xelaev18044351m
													parp2.L
													cd151.S
													eva1a.L
													otx1.S
													LOC108719251
													gabarapl1-b
													adamts1.S
													mespb.S
													znrf3.S
													ier2.L
													aldh1a2.S
													fam110c.S
													fbxo34.L
													ssh2.L
													Xelaev18021795m
													osr2.L
													Xelaev18013483m
													cdc14b.L
													aplnr.S
													rbfox3
													ulk1.S
													LOC108709430
													skil.S
													vegt.S
													ctsf.L
													pth1r.L
													shbg
													scin.L
													mapkapk5.L
													tmcc1.L
													best2.L
													plk3.S
													LOC108714958
													loc733735.L
													vgll3.L
													Xelaev18030357m
													mob2.2.L
													hamp2.L
													tril.S
													adamts19.L
													Xetrov90005150m.S
													cep19.L
													itgb1.S
													dusp5.L
													LOC108695556
													osr2.S
													lpar6.L
													pros1.L
													nrip3.L
													slc26a11.L
													ubxn11.S
													gna11
													sephs1.L
													LOC108715921
													has2.L
													glrx5.L
													LOC108714970
													loc108715171.S
													eomes.S
													LOC397693
													fgf20.L
													hes7.2.L
													mapre2.S
													ier2.S
													atg16l1.L
													dst.L
													Xelaev18019163m
													zbtb18.S
													xetrov90011961m.S
													MGC52759
													plcl2
													LOC108718070
													neurl1b.L
													foxc1.S
													trib1.L
													lhx8.S
													zdhhc2.L
													snrk.S
													t2.S
													mbd6.S
													klf6.S
													xkr5.L
													aagab.L
													tacc2.L
													flrt3.L
													ccno.L
													irs2
													cbln1.L
													fam109b.L
													dctn4.S
													Xelaev18001309m
													hoxc12.S
													LOC108717933
													hcfc2.L
													vps37d.S
													gpr45.S
													slitrk5.S
													rab11fip3.S
													LOC108719533
													LOC108705598
													Xelaev18029885m
													LOC108717435
													Xelaev18003995m
													LOC100489157-like.S
													dusp5.S
													nav2.S
													ugp2.S
													Xelaev18000325m
													LOC108705749
													ccno.S
													pcdh9.L
													sst.S
													marcksl1.L
													gadd45g.S
													hes7.2.S
													frem2
													irs2.L
													tmem45a.L
													snai1.S
													prpf8
													LOC108719510
													Xelaev18007952m
													ces5a
													glul-like.1.S
													cyb561.L
													cacnb2.L
													adcyap1.S
													spry1.L
													kcnh2
													LOC108717924
													Xetrov90024734m.S
													cdc42ep4
													stat5b.L
													lamc1.L
													LOC108704568
													sall1
													hhex.S
													col18a1.L
													sp5l.S
													LOC108718647
													acvr1.L
													rhpn2.S
													arrdc2.L
													cyp27c1.S
													farp2.S
													sp7.L
													cyp2c8.1.L
													lrriq3.S
													per3.L
													LOC108714321
													mapk6.L
													sap30.S
													star.L
													metrnl.S
													ssbp3.L
													npdc1.1.S
													pitx2.S
													mcl1.S
													LOC100489554.L
													enc1.L
													wdr83os.S
													znrf3.L
													LOC108698488
													dusp6.L
													dnajc30.L
													nr2f1.L
													usp43.L
													supv3l1
													peli2.L
													LOC100158389
													cdh26.S
													plekho1.L
													hunk.L
													arhgef16.S
													nuak1.S
													Xelaev18002313m
													znf585b.S
													ep300.L
													prrt4
													crebzf.S
													notch3.L
													slc9a3.L
													tmem178b
													ptmap12.S
													ckap4.L
													sox4.L
													plgrkt.L
													mat2a.S
													ano5.L
													myo5b.S
													dhrs3.S
													ep300.S
													g2e3.L
													plpp2.L
													knl1
													hip1.L
													ski.L
													pus10.S
													tgif1.L
													tcf7l1.L
													arntl.L
													slc43a2.L
													pls3.L
													spry1.S
													rasl11b.L
													LOC108708226
													elk4.S
													pkp2.L
													il6st.L
													kifc3.L
													sesn2.L
													ephb3.L
													LOC108695544
													cidea.L
													cln3.L
													LOC100191024
													mllt1.S
													marcksl1.S
													frmd4b.L
													stx19.L
													ficd.S
													atp1a1.S
													sox17b.2.L
													gapdh.S
													cyp26a1.S
													vav2.L
													larp4b.L
													zbtb10.S
													cdk5r1.S
													nodal1.S
													bmp4.L
													hs6st1.L
													usp53.L
													ctc1
													setd5.L
													pofut2
													lmo4.1.L
													nek2.S
													sfpq.S
													gas1.L
													arntl.S
													sap30.L
													ccnj.L
													alms1.L
													ptbp1.L
													ets2.L
													npdc1.1.L
													rhebl1.S
													hes6.1.S
													rab40c.L
													ddx17.L
													Xetrov90014406m.L
													sh3d19.L
													smim3.S
													pex13
													arl5c.L
													sgms1.S
													hnrnpu
													loc100495271.S
													rps6kb1.L
													snrnp200.L
													elmo1.S
													dhx15.L
													usp37.S
													LOC108706589
													mfge8.L
													cpsf1.L
													LOC108698884
													spag9.L
													bix2.L
													LOC108696874
													svip.S
													dtx2.L
													smarcc2.L
													rnf38.L
													tp53bp2.L
													cxcr4.L
													vmn2r26
													c7orf57.L
													lpar4.L
													foxa1.S
													lpin2.S
													stam.S
													MGC68680
													psmb3.S
													acbd3.L
													tubb
													larp4b.S
													ylpm1.L
													acbd3.S
													uba1.L
													snai1.L
													tcp11l2.S
													tomm70a.S
													LOC108715080
													slc4a11.L
													stag2
													sp5l.L
													anp32e.L
													tram1.S
													slc25a29.S
													srsf4.L
													kiaa0247
													ilf3.L
													gsk3a.S
													arntl2.S
													ubr1.L
													zfat.L
													MGC84194
													cbs.L
													rnf114.L
													rbm47.S
													rbm12b.1.S
													xbp1.L
													ctbp2l.L
													yap1.S
													sdc4.S
													MGC83090
													LOC108719569
													eomes.L
													krt18.L
													fus.L
													vapbl.S
													myo10.2.S
													ubap2.L
													c6orf62.L
													h3f3b.L
													ddit4.L
													ovch1.L
													LOC733563-like.1
													lrp6
													wdr11.L
													prpf39.1.L
													ptbp1.S
													arl13b.L
													dsp.L
													phc1.S
													ift172.L
													sf3a2.S
													gon4l.L
													actr6.L
													esyt2.S
													chic2.L
													rxrb.S
													pc.S
													mat2a.L
													galnt2.S
													stag2.L
													commd4.S
													nup188.S
													timm23
													cdh3.L
													eef2.1.L
													vdac1.L
													MGC115585
													atp1b3.S
													tpp1.L
													capn7.L
													LOC108715635
													tceb2.L
													arhgap17.L
													eif3a.L
													alms1.S
													srrm1.S
													eprs.L
													chst7.S
													ncl.S
													smad6.L
													hnrnpul2.S
													ccnf.L
													LOC108699131
													fn1.S
													rad21.L
													sertad3.L
													sgsm3.L
													srsf1.S
													lima1.S
													polr1a.L
													srsf11-like.S
													prkca.S
													ctbp2.S
													pdcd11.L
													LOC108695505
													imp4.S
													htt.L
													dnah9.S
													LOC108719547
													skiv2l.L
													zbtb48.L
													sf1.S
													nek1.L
													myh10
													ddx27.L
													pabpn1.S
													atg16l1.S
													trip12.S
													cs.L
													vars.S
													hnrnpk.S
													xpc.L
													stx6.S
													cyfip1.L
													vcp.S
													gripap1.S
													phrf1.S
													anapc1.S
													hnrnpa3.S
													tuba4b.L
													son
													krt18.S
													lrpprc.L
													dsg2.L
													mtss1.2.L
													ash2l.L
													znf852.L
													cd2bp2.S
													gnl3.L
													arfgap3.S
													acly.S
													hnrnpa0.S
													mbtd1.L
													aup1.S
													smarca4.S
													nsf.L
													pyroxd1.L
													tdg.S
													eif3c.S
													prcc.L
													ctnnb1.S
													dnajc7.S
													gpcpd1.L
													kiaa0907.L
													srsf1.L
													u2surp.S
													snd1.L
													casc3.S
													p4hb.S
													ccne2.L
													khsrp.S
													nop56.L
													ubtf.S
													odc1.S
													rnf40.L
													copb1.S
													ddx23.S
													mtf2.S
													uroc1.L
													fkbp15.L
													srsf6.L
													dsp.S
													heatr3
													anp32e.S
													nbn.L
													safb.L
													kiaa0368.L
													crkl.L
													ctr9.S
													fbl.L
													pwp2.S
													sugp2.L
													atp2a2.S
													LOC108715139
													pabpn1.L
													cpsf6.S
													cad.L
													sugp1.S
													amd1.L
													luc7l3.L
													azin1.S
													zfr.L
													tp53bp1.S
													myh10.S
													npepl1.S
													ubap2l
													trim7.S
													tfdp1.L
													cgn.L
													hnrnpm.L
													hmgb3.S
													elf2.S
													tpp2.L
													utp6.L
													nup205.L
													bix1.3.L
													smc3.S
													rnf17.S
													sf3b1.S
													prickle1.S
													neurl4.S
													ctr9.L
													iws1.S
													pabpc1.L
													nop58.S
													ddx21.L
													cherp.S
													hnrnph1.S
													smc1a.S
													xnf7.L
													thoc1.L
													ctnna1.S
													lypla2.S
													vcp.L
													cdc42.L
													eif5b-like.S
													sf3b2.L
													exosc5.L
													fubp1.S
													msantd4.S
													smc1a.L
													xrn1.L
													sumo3
													msh2.L
													aars.L
													asun.S
													hnrnph1.L
													dhx8.S
													srrm1.L
													orc3.S
													pelp1.L
													ddx5.L
													tcof1.S
													arhgef1.L
													srsf3.S
													dlgap5.S
													snrnp70.S
													far1.L
													hnrnph3.S
													naa35.S
													ywhab.S
													ranbp1.S
													npepps.L
													cog5.L
													srp72.S
													set.S
													nfyb.L
													gphn.L
													nodal2.L
													hsf2.2.L
													senp3.L
													ywhab.L
													nacc1.L
													thoc5.L
													ftsj3.L
													smndc1.L
													prpf4.L
													utp20.L
													eprs.S
													iws1.L
													sltm.S
													h3f3b.S
													rpl3l
													mybbp1a.L
													dot1l.L
													ugdh.L
													ilf3.S
													rac1.L
													zbtb2.L
													uggt1-like.L
													psmc1.L
													cbx3.L
													znf326.S
													ewsr1.S
													eif4a3.L
													cul9.L
													eftud2.L
													bms1.L
													puf60.L
													myh9.L
													ywhae.S
													impdh1.L
													ddx4.L
													dda1
													psap.L
													fubp1.L
													cmpk1.S
													atp5b.S
													copg1.S
													nucks1.L
													zc3h13.S
													nup107.S
													dhx15.S
													eif3a
													ppil2.S
													nol10.L
													hdac1.S
													anp32a.S
													mad1l1.L
													azin1.L
													pcbp2.L
													ezh2.L
													caprin1.S
													lmnb1.L
													rbm22.S
													arf4.S
													matr3.S
													sec61a1.L
													eif2s2.L
													actl6a.S
													mdc1.L
													ogdh.L
													mcm7.L
													anp32c.L
													rsrc2.L
													ppp2r1b
													suclg2.L
													lrrc1.S
													crkl.S
													cwc25.S
													hsp90ab5p
													smu1.S
													ppm1g.S
													rbm14.S
													grk5l.L
													maf1.L
													cwc15.S
													syncrip.S
													LOC108719027
													actl6a
													nolc1.L
													bckdk.S
													psme4.L
													tpm3.L
													jup.S
													dlat.L
													gpr107.L
													alyref.L
													blzf1.S
													mtdh.L
													wdr44.L
													aldh6a1.S
													vrk3.L
													cldn6.2.L
													mphosph10.L
													cwf19l1.L
													ik.L
													csnk1a1.L
													srsf12
													tra2b.L
													eif4b.L
													dnaja2.S
													ppp1ca
													cnn3.S
													bzw1.S
													fcf1.L
													bsg.L
													snw1.L
													stt3a.L
													anxa7.S
													sf3a3.S
													mms19.L
													larp7.L
													cwc22.S
													tmco1.S
													tpm1.L
													ythdf1.L
													dhx36.S
													pds5a.S
													usp10.S
													g3bp1.L
													znf706.2.S
													tmpo.L
													gnb1.S
													ubfd1.L
													MGC53795
													nap1l1.S
													etf1.S
													snd1.S

## Sheet: St10-10.5_Decrease
List of Genes for all Overlapping Temporal DESeq Groups, corresponding with supplemental figure 3
All_Lineages	Epi-Meso-Neur	Epi-Meso-Endo	Epi-Neur-Endo	Meso-Neur-Endo	Epi-Neur	Epi-Meso	Epi-Endo	Neur-Meso	Neur-Endo	Meso-Endo	Epi	Neur	Endo	Meso
adnp.L	kif24.L	top1.2.S	kpna3.L	picalm.1.S	xk	cdk8	per3.S	trpm7.L	smarca5	baiap2l1.L	lemd3.L	dnajc10.L	lman2.S	haus3.L
smagp.S	jmjd1c.L	tubgcp3.S	ddx3x.S	pex10.L	arhgap11a.1.L	b4gat1.L	kctd5.L	acadl.L	sat1.L	zfc3h1	pold2.L	natd1.L	lonrf2.L	sec62.S
rpgr.S	mark4.L	ankle2.L	pard3.L	arhgap32.L	zdhhc8.S	lrrfip2	dnajc14.S	gtf2ird1.S	depdc1-b	kif23.L	gabpb2.S	aspm	isca1.L	csnk1g3.L
eri1.L	igf2r.L	gpr157.L	rffl.L	gcc1.S	velo1.L	nfxl1.L	eif6.L	nkd1.S	tle1.L	ccnl1	mast3.L	kiaa0513.L	fnbp1l	adarb1.L
borcs7.S	ctif.L	ppp1r12a.S	c1orf84.L	ints14.S	akap1	lrrc28.L	spag9	trip11.L	ctdsp2.L	rsf1.S	trappc8.L	esco1.L	dusp11.S	LOC108699095
fcho2.L	pdzd8.S	lemd3.S	src.L	med4.S	ap2b1.S	fitm2.L	armc1.L	tpcn1.L	zfp36l1	gtf2a1.L	trmt13.L	ptges2.L	chaf1a.S	lipe.L
rb1cc1.S	plxnb2.L	dnajc16.S	ncoa4.S	golph3l.S	n4bp1.L	tubgcp5	pop4.L	limch1.L	osbpl8.L	fam214a.L	prkaa1.S	dgcr2.S	gpat4.L	telo2.L
dars2.L	plxnb2.S	LOC108704268	trmt6.S	mtmr10.L	pkn2.L	tmem104.S	suv39h2.S	ubr3.L	csnk1d.L	fam189a1.S	hmbox1.S	ctdsp1	ykt6.L	mterf1.L
srgap2.S	Xelaev18031388m	znf684.S	pxn.L	lhfpl2.S	kctd6.L	prss16.L	nde1.S	fry.L	kdm3b.L	eri2.L	stam.L	tspan14.L	zfand6.L	flna
tdrp.S	bdp1.S	ppip5k2.L	wdr81.L	wwp1.S	kif1b.S	LOC108703835	zc3h7a.L	c16orf46	eml4.L	strbp.L	trib2.S	bod1l1	nol9.L	snx1.L
arf6.S	znf526.L	znf268	plekhf2.L	rab21.L	map2k7.L	pcdh1.S	apc.S	nr1i2.S	slbp.L	blcap.L	nsd1.L	gdf9.L	chfr.L	tdrp.L
chd8.L	snx17.L	furin.L	fem1b.L	nckipsd.L	slc20a2.L	zfhx2.S	tgs1.L	ube3c.L	letmd1.L	r3hdm1.S	acot11	cbfb.S	ppp2ca.S	rad51d.L
atp10b	rasal2.S	rab8a.S	ddx19b.L	pcyox1.L	pdpk1.L	racgap1.S	smn2.S	tspan33.L	arfgap1.S	vash1.L	nedd4l.S	tbc1d4.L	znf335.S	parpbp.S
dcp1a	cracr2b.L	mphosph6.L	adam10	prickle4.S	wdfy3	pign.S	tmem209.S	dclre1b.L	kif22.L	mapk7.L	lamp1.L	slc25a44.L	mastl.L	yaf2.L
ubr5.L	dtx2.L	ism1.L	rnf41.L	arhgap32.S	suco.L	LOC108704532	zswim1.S	syne2	tnfaip1.L	nploc4.S	itsn1.L	gpn3.L	szrd1.S	abca3.S
adnp.S	fryl.L	pkd2.L	smap2.L	nf1.S	zyg11b.S	gpi.S	phf3.L	ttbk2.L	zdhhc14	ppp1r21.L	rnf25.L	irak1.L	ipo9.L	cry-dash.L
vps13c.L	dcun1d3.L	spty2d1.S	tmc7.S	rfwd2.S	sox13.S	cidec.L	fez2.L	pot1.L	naa15.S	dyrk3.S	zfyve28-like.1.S	rbfox2.S	slc30a1.S	timm23.L
ttc9.L	tigd4	katnb1.S	spin1.L	tubg1.S	mief1.L	surf1.L	myo9b.S	lrp8.L	rassf3.L	coq10a.L	phax.S	ripor1.L	mkrn3.L	ap2b1.L
prrg1.L	zic2.S	luzp1.S	usp9x.L	cog1.S	edem3.L	scyl2.L	aaas.L	abhd15.L	atmin.L	chpt1.L	dpagt1.L	lcor.L	fgf8.L	cdc20.L
nemp1.L	slc8b1.L	scarb2.S	tcf7.S	kiaa1191.L	fbxl4.S	heatr5a.L	ins	zbtb37.S	phlpp1.L	avpi1.S	txlng.S	taok3.L	ptpra.S	uap1.S
ankhd1.S	zic2.L	vps54.L	bnip2.S	cry1.L	hgsnat.L	fgfr3	c5orf24.S	arrdc4.L	ubtd1.S	tdh.S	kdm5c.S	snap23.L	fam46c.S	gcnt3.S
scyl2.S	cdc42ep2.L	ptpn12.S	gmnn.S	uvrag.L	slc9a1.L	myc.S	samd4b.S	znf484.L	slc12a6.S	gpkow.L	akap17a.L	actn4.S	atad5.L	jak1.L
gnai2.S	tmem184a.S	cnot8.S	tyro3.L	dbf4b.L	dcaf5.S	nin.L	yae1d1.L	LOC108706483	cox5b.2.L	ccnl1.L	MGC78973	smarca5.S	grk6.S	creld1.L
tasp1.S	foxh1.S	mex3d.S	homez.L	prex1.S	usp38.L	depdc4.L	bicd1.L	LOC108719063	znf646.S	lin9.S	arl2.L	LOC108701074	c3orf58.S	adcy7.L
rab8b.L	mllt6.S	LOC108704248	alkbh4.L	dctn4.L	tapt1.S	LOC108709941	csrnp2.S	fgd6.S	ndc1.S	lgalsl.S	clec16a.L	ppp1r9a.S	arpc4.S	macc1.L
fam107b.S	pxylp1.L	taf9b.L	tcf20.L	trit1.L	inpp5b.L	irf9.L	fnbp1l.L	march2.S	rapgef1.S	stox2	plekha1.L	wdr41.L	cysrt1	cct6a.L
arhgef7.S	card19	ints6.S	cdc42bpb.L	LOC108716797	atp8b4.L	tgds.S	foxn2.S	zc3h12b.L	stx2.L	pigb.S	oaf.L	amer1	fam26d.L	LOC108704267
cebpg.L		espl1.L	adam17.L	gigyf2.S	akap9	spire2.L	cdt1.L		trim33.S	pcgf2.L	pex1.L	kdm4a.S	uba3.S	irs2
usp22.S		mcoln2.L	sos2.L	fignl1.L	herc1.L	LOC108704531	gemin2.S		tmem110.S	LOC108698600	cux1.S	tmem131.L	med14.L	tmem255a.S
prc1.S		axin1.L	pid1.S	snx13.S	rnf13.S	bves.L	irf2bp2.L		cachd1.S	thap1	ptpn23.S	lin9.L	ahctf1.L	sec62.L
slc30a6.S		fchsd2	c11orf95.L	tmem104.L	mfsd14a	hs6st1.L	rrm2.2.S		mcm3ap.L	bcar3.L	nfx1.S	kiaa1671	smarcad1.S	kmt2c.S
tmtc3.L		men1.L	ubl3.S	MGC115510	tex2.2.S	cdc42se2-like.2.L	samd4b.L		poldip2.S	msantd3.S	atrip.S	b3gnt4.L	golga7.S	loc100158433.L
socs5.L		agap1	eif6.S	fasn.L	srgap2.L	LOC108696623	ovca2.S		prkcsh.L	epb41l4b.S	appl2.L	zhx3.S	bnip3.L	trappc2.S
snx7.L		dph6.L	fbxo45.S	cep126	tmem198.L	lpcat1.S	dlg1		samd4a.L	lamtor3.S	Xelaev18046477m	tram2.L	tlk1.L	mier2.S
slc15a4.S		ercc8.S	impad1.S	gatsl3.L	slc9a6.L	dand5.S	ikbkg.L		asap2.L	unc119.L	ubtd2.S	znf131.L	ash1l	c16orf59.L
asb6.S		tmem51.S	man2a2.L	arhgef11.S	mios.L	tdgf1.1.L	hinfp.S		nsd1.S	MGC86530	lpgat1.L	stim2.S	dgkq.L	dtna.S
slc30a7.L		znf234.L	pxn.S	gpi.L	pik3ca.L	fam57b.S	mcm3.L		nckipsd.S	rce1.S	tcf19.L	kiaa0513.S	foxm1.S	map4k3
nus1.S		tada3.S	nup133.L	mis18a.L	fam20b.S	fdft1.S	mcm10.L		gtpbp1.S	haus6.S	gmfb	herc3.L	rcor2.L	sgms1.L
znf436		haus6.L	ppp1r12a.L	gse1.S	slc6a14.2.L	admp.S	idh3a.S		gid8.L	etnk1.S	mfsd5.S	rev3l.L	ube2c.L	mast2
ap5b1.L		b4galt5.L	slc39a9.L	slc15a4.L	rab31.L		spopl.L		znf143.L	irf2bpl.S	chd6.L	mtmr1.L	maea.S	fgfr1.L
ubn2.S		depdc7.S	snx4.S	ormdl1.S	itsn2		rab8a.L		ube2k.L	ficd.L	mier1.L	slc9a7.S	grasp.S	abo.3.L
pard6g.L		znf782.S	maz	LOC108707483	snph.S		malt1		blcap.S	clk2.S	afg3l2	tmem184c.L	hmgxb4.S	LOC108695585
batf3.S		lrr1.L	magi1.L	atp9b.L	ccny.L		msl2.L		LOC108704685	bicc1.L	bdp1.L	rraga.S	bnipl.L	c3orf17.L
chp1.L		znf654.L	clint1.L	LOC108705257	ube3a.L		sdhd.S		znf618.S	myd88.S	myo9b.L	ralgapa1.S	abhd17a.L	chfr.S
rfc1.L		tmem5.S	sec22a.L	rnf217.L	bach1.S		dag1.S		pik3c2a.S	slc25a44.S	chd6.S	zbtb33.S	sgol1.L	dusp8.S
orai2.S		ppp1r13b.L	bcdin3d.L	zdhhc7.S	mfsd13a.S		bahcc1.S		rnf19a.S	ptpn12.L	opa1.S	abcd1.L	diaph3.L	LOC108695529
grk3		ext1.S	hspa5.S	gnpat.S	ipmk.S		sdc3		MGC83970	poc5.L	tbc1d12.L	insrr.L	zfand6.S	nme6.L
svil.L		trpv4.L	pan3.S	scap.L	arhgap26.S		gxylt1.L		usp9x.S	orai2.L	usp32.L	nlk.L	plpp1.L	plekhm1.S
pwwp2b.S		rnf145.S	pou2f1.L	tsen34.L	ankib1.L		hipk3.S		LOC108719553	znf33a.L	gpm6b.S	rfwd2.L	erf.L	fgfr1op2.L
ppp3cc.L		kiaa1715.L	ubap1.S	sept8.S	dip2a.S		snx1.S		csgalnact2.L	atf5.2.S	Xelaev18003062m	ralgps2.L	lpgat1.S	tmem177.L
plekhg4.L		tank.S	kpna4.L	arid4b.S	rnf139.S		jade3.L		ppp1r15b-like.S	snx11.L	cdc42ep2.S	ankrd28	mtx2.L	samd4a.S
anapc13.1.L		cbwd1.1.L	sys1.S	Xelaev18011044m	Xelaev18001402m		tbc1d12.S		habp4.S	wdr7.S	LOC108704196	aff1.L	ccdc28a.S	myo10.2.L
zbtb33.L		usp44.L	snx9.S	znf577.L	LOC108695565		tradd.L		usp49.S	rfxap.S	top3a.L	mgat4a.L	psma7.S	LOC108703842
brca2.L		dact1.S	snx27.S	wdr77.S	bcar3.S		hspbap1.L		oxct1.L	git2.L	cc2d1b.S	clp1.L	raph1.L	LOC108703744
katnb1.L		sec24b.L	adam9.S	mos.L	LOC108709443		usp37.L		mzt2b	arap1	ccdc88a	fam20b.L	baz1b.L	eif4e3.L
stambp.L		mastl.S	MGC83487	fbxl12.L	kank1.S		ddx3x.L		atp10d.L	frmd4a.L	brox.S	armt1.L	wdr26.S	glo1
cdc6.S		trim39.L	zcchc11.S	n4bp3.S	egr1.L		azi2		rad54l	atrip.L	c14orf119.L	man1b1.L	c4orf27.L	tmem87a.L
klhl7.S		b4galnt4.S	smtnl2.S	tmem169.L			cab39l.L		csk.L	senp1.L	celsr3	ppp1r15b.L	rab23.S	usp12.S
pdzd2.S		orc1.L	slc7a6os.L	tanc2			klhl15.L		grhl1.S	lpar1.S	lpin1.L	cdon.S	cdc42se2-like.1.S	sgk223.L
znf507.L		atp6v0a2.L	vcpip1.S	commd9			LOC108710728		mia3-like.1.L	fibp.L	LOC108710058	cops8.L	znf574.S	hbegf.S
aebp2.S		ccdc126.S	pef1.S	asphd2.S			map3k10.L		nos1ap	uhrf1bp1l.L	ppp1r14a.S	map4k4-like.L	tuba4.L	LOC108714146
sbf2.S		cyp1a1.S	tead1.S	btbd3.L			prr14.L		gid4.S	scnm1.L	adgrg1.S	cog3.L	stk26	LOC108719399
ccnyl1.S		loc733556.L	vangl2.S	sos1.S			tdrd6.L		zar2.L	rnf138.S	emsy.S	hmgxb3.L	cnot11.L	LOC108703819
stambp.S		fam83g.L	mgea5.S	bach1.L			eme1.L		unnamed.S	atp13a4.S	fam208b.S	inpp5f.L	dcbld1.L	Xelaev18045296m
vps26b.S		pym1.S	suox.L	msantd3.L			rab5c.L		nlk.S	gatad2b	mapkapk5.S	pik3r2.L	phactr4.S	cdk5r2.L
alg11.L		galnt4.L	rnf220.1.L	ankrd54.L			arl10b.L		ninl.L	klhl12.S	napg.L	mpp6.L	znf319.S	znf521.S
fut8.S		gcnt1.L	LOC108701166	eea1.S			arl9.L		mpst	ints6.L	sorl1.L	mfsd14b	mthfd2.S	ttll11.L
ccdc186.L		Xelaev18031390m	xl64phr	picalm.1.L			ing2.S		phlpp1.S	zufsp.S	ankrd40.S	nck1.S	dlg3	mgat4b.S
fam69a.L		efcab14.L	dicer1.L	palb2.L			ado.L		kdf1.L	mbd4.L	pard6b.S	hectd4.L	tmx4.L	hes1.L
ranbp2.S		exd1.L	rpa2.L	cry4.L			tbc1d10a.L		znf516.L	jade3.S	brf2.S	ryk.S	LOC108706563	zic3.L
wdr37.L		myo19.S	mtus1	sec24b.S			Xelaev18023494m		rnf130.S	exoc2.L	plin3.S	lama5	LOC108713924	grin2b.S
rab9a.L		loc100216027.L	tnrc6b.L	atg9a.L			bcl9l.S		MGC83705	alg6	pprc1.L	usp6nl.L	fam76b.L	prorsd1p.L
b3gnt7.S		qrich1.1.S	ube2j2.L	sik2.L			insrr.S		dag1.L	siva1.L	r3hdm4.S	mcrip1.S	med30.L	MGC115291
slc39a10		slc35e2b.L	pcmtd2.L	sun1.L			oaf.S		dtna.L	mtmr2.L	LOC108703778	extl3.L	ccdc68.S	pptc7
nus1.L		rapgef2.S	LOC108716761	josd1.S			fntb.S		trim33.L	fam3c.L	cptp.L	acvr1.L	cep57l1.L	LOC108714033
MGC85180		txndc11.L	fam193b.S	nadk.S			med26.L		txn2.S	atf7ip.S	cep164.L	rilp.S	pten.S	adamts8
e2f4.S		rbm24.S	ipo13.S	psat1.L			crls1.S		xzar2	baiap2l1.S	dpf2.L	atp13a1.L	LOC108719340	errfi1.S
ate1.L		ube2w.S	kif18a.L	slc18a2.L			evi5.S		btbd2.S	osbpl3.L	parl.L	atg13.S	efcab14.S	kctd18.S
dpp9.L		LOC108699305	rassf2.L	tnrc6c.L			znf423.L		vangl2.L	mllt4.L	fam46c.L	dact1.L	alkbh5.S	znf362.S
atp2c1		ect2.S	nsmaf.L	ndel1.S			hps6.L		acvr2b.S	stx11.S	zer1.L	pid1.L	cdan1.L	LOC108695586
atp8b1.L		b3gnt5.L	cbx2.S	rpap1.S			cbwd1.1.S		slc25a36.S	wasll.L	vps16.S	loc733726.L	shprh.S	hlx
agap1.L		tor1aip1-like.L	mfsd11.S	aldh2.L			mov10l1.L		znf821.S	baiap2l2.S	ide.S	birc6.S	clk1.L	ern2.S
rictor		satb1.S	mphosph9.L	gpr75.L			arhgef11.L		dnajc13.L	cd276.S	LOC108719543	rexo1.L	nvl.L	LOC108699297
slc22a23.S		wdr60.S	mau2.L	fam134b.S			mfsd13a.L		cep85l.L	MGC83673	fbxo45.L	eml1	snx30.L	LOC108719557
acot12.L		rlf.S	btbd3.S	serinc2.L			psme3.S		ppp2r5e.L	jmy.L	mtmr10.S	ptpn13.L	ppp2r1a.L	kctd14.S
cep350.S		marchf2	gcc1.L	fam110b.S			zbtb41.L		abhd13.L	itpk1.S	tbc1d9b	atrn.L	gtdc1.S	trps1.S
ptcd2.L		sphk1.L	carkd.S	sod2.S			crtc3.S		nr2c1.L	bag5.S	capn15.L	hectd4.S	pip5k1a	ccdc102a.S
mthfr.L		jmy.S	pdik1l.L	slc35a1.L			znf526.S		bcl11a.L	slain2.S	wdr90.L	tnpo1.L	ivns1abp.S	angptl4.L
fbxl18.L		kiaa1456.L	mark1.L				spryd3.S		atg14.L	spdl1.L	dgke.S	timm50.L	mal2.S	smim8
dapk1.L		Xelaev18032680m	vps50.L				kif1b.L		kiaa0355.S	MGC147172.L	stard7.S	gpr155.L	adpgk.L	zfp36
tprn		LOC108704241	znf646.L				nrip1.S		rlim.S	znf639.S	ak3.L	vps53.S	fdx1l.L	pld2.L
ncoa3.S		irs1.S	sesn2.S				rps6ka3.L		kat2b	pwwp2b.L	slc20a1.S	ubl3	chmp4c.S	nubp1.S
hells.S		def8.L	cap1.S				cpeb2-like.S		Xelaev18024710m	ttc37.L	pacs1.L	sh3bp5.L	raver1.S	usp20.L
sertad2		pias1.S	cdc42bpb				rnf169.L		tnfaip8.L	snx25.L	pqlc1.1.S	dennd4c.S	mrps25.S	slc7a1.S
fam21a.L		mtbp.S	arg-a				birc7.L		styx.S	kmt2c.L	prkcsh.S	xvent-2b	atg101.S	hivep1.L
LOC108704624		papd5.S	lrif1				eif2ak1.L		ccdc117	fbxo46.S	sbk1.L	adam10.S	ptgfrn.S	eda.S
zbtb5.S		rnf169.S	cgnl1.S				kctd3.S		xpo4.L	dip2b	borcs6.S	ccpg1.S	efhd1.L	nt5dc3.S
bptf.L		fastkd1.L	eea1.L				ube2z.S		aip.L	cry2.S	narf.L	aen.L	ctdspl.L	socs3.L
fam134c.L		cep85l	apcdd1.L				plekhg1.S		LOC108719552	exd2.L	pip4k2b.S	loc733735.L	emc8.S	fam53c.L
akap13.S		zbed6	morf4l1.L				zfyve1.L		cachd1.L	LOC108704263	klhl21	slc29a3.S	rabgef1.S	txnrd1.S
rnf8.L		plch2	rhog-like.1.S				rapgef6.S		elmod3.S	atad3a.S	dusp22.S	lcor.S	traf7.S	hdac2.L
polg.L		hhipl1.L	tmcc2.S				ccng2.L		fbxo10.L	e2f1.L	sash1.S	ssh2	ccdc94.L	LOC108709062
rnf19a.L		ntmt1.S	pigv.S				fbxo31.L		derl2l.L	tnfrsf10b.L	spire1.S	dcun1d5.S	fam69a.S	atf6b.S
lysmd4.L		oat.1.S	ganab.L				ankrd52.L		med13l.L	chmp7.L	LOC108703844	naa25.S	slc35e1.L	kcnn2
rcbtb1.S		trabd.L	traf3ip1.S				pikfyve.L		pxk.S	cfap97.L	klhdc10	rock1.S	cisd1.L	foxb1.L
cenpl.S		hn1.S	ythdf3.S				ccdc64.L		grasp.L	nsmf.S	LOC108695520	strada.L	kansl1	pygo1.L
foxh1.L		adamts6.S	mpp5.L				kbtbd8.S		chd8.S	cttnbp2nl.L	chic2	hs2st1.S	map4k4-like.S	socs3
usp22 a		c5orf51.L	btbd9.S				rabgef1.L		spg11.L	trappc13.L	slc39a13.S	glce.L	hpcal1.L	Xelaev18017348m
abcb6.L		atxn7l1.S	dolpp1.L				dop1a		mef2d.S	gtf3c1.L	sp5l.L	twsg1.L	LOC108700255	chrd
pde8a		ppp1r3b.L	dcaf5.L				edc3.L		vps18.S	rgs3.S	tmem63a.S	znf518b.L	atg101.L	hes1.S
usp32.S		kiaa2026.L	sh2b3.L				fnip1.L		taok3.S	traf3.L	mapkbp1.L	kbtbd3.S	mybl2.S	foxd4l1.2.L
rel.S		vezt.L	arhgap21.L				sh2b1.S		cep97.L	birc7.S	LOC108699896	tbc1d8b.L	cited4.S	gpr12
adnp2.L		csgalnact1.L	slc39a10.L				setbp1.S		LOC108699992	crem.L	adcy9.S	itpkc.S	dhdds.L	dmrt2.S
ube2j2.S		sprtn.S	apc.L				asxl3.S		zwilch.S	LOC108699302	fbxl3.L	dck.1l.L	tle1	foxb1.S
tor2a.L		cyp2r1.L	phf19.S				blm.S		nfatc3.S	zbtb24.L	rad51c.L	bptf.S	bnip3.S
kmt2b		gmnn.L	usp34.L				LOC108703749		ap4e1.S	ypel1.S	tmem64.S	daam1.S	ccnyl1.L
usp31.L		eda.L	pigc.L				c14orf166.S		ndrg4.S	ky	rnf146.S	mef2d.L	tmem189.L
tank.L		pcnxl4.L	arid4b.L				pik3r3.S		znf462.L	myo1e	slc4a11.L	alg12.L	znf585a
atl2-like.S		tnfsf11.L	triobp.S				golga5.L		tnpo2.S	prex1.L	znf282.L	ccdc88a.S	mcph1.S
spryd3.L		slf1.L	fam46b.L				pde6d.L		icmt.S	sirt3.2.L	arhgap33.S	bnip1.S	pgam5.L
tmem110.L		ndst2.S	sel1l.S				zbtb8b.L		pard6g.S	zbtb14.L	papd4.L	fkbpl.S	dazap2.S
arhgef15.L		mex3d.L	mgat2.S				rlf.L		tns3.L	hes2.L	ccdc53.L	usp46.S	dgcr2.L
nap1l4.S		golga5.S	smg7.L				ppp2r2d		tcp1.S	nr1d1	mrpl28.L	pag1.L	uxs1.S
cited2.L		map2k4.S	cers5.L				tnks2.S		cmtm4.S	fut11.L	erf.S	grb10.L	cers3.L
rnf19b.S		letm2.S	anapc7.L				LOC108704260		rbm38.L	ercc4.L	fam3a.S	spast.L	usp47.S
smc5.S		tbk1.S	chst8.L				atp8a1.L		tnrc6b.S	cep104.S	nol4l.S	mtss1.1.S	ints5.L
fryl.S		gramd2b.S	lbh.S				apaf1.L		rmnd5a.L	ccdc3.L	minpp1.L	rps6ka6	insig2.L
habp4.L		cdkl5.L	lifr.S				map7d2		gse1.L	hsd17b7.S	irf6.2.L	LOC108710061	rnf11.S
dock4.L		rcan3.L	fkbp6.L				rita1.S		asap2.S	tbccd1.L	fam177a1.L	ripk4.L	clic1.S
gtf2ird2b		evc2.L	arhgap21.S				tbc1d25.S		dolpp1	arf3.S	kdm7a.S	cyp27c1.S	ankrd12.S
ccnb2.S		tmem143.S	amfr.S				dnajc16.L		LOC108700013	tnfsf11.S	ube2f	asxl3.L	atxn7.S
snx13.L		ell.S	snx10.L				tmem259.S		wtip.S	chpf.S	rims2	rapgef1.L	gng10.L
pex12.S		ptprh.S	zbtb16.S				pak4.L		foxr1.L	saysd1.L	zbtb3.S	snx16.L	ano1.L
fez2.S		plag1.S	inf2.L				slc25a44		itpkc.L	paqr3.L	entpd6.L	ankib1.S	ywhag.L
ddx1.L		ccdc191.L	setbp1.L				c17orf53.L		ing3.L	klf15.2.L	pkn3.L	kif6	ndor1.L
tbc1d14.L		coq6.L	ankrd13c.S				rnf44.S		MGC79091	zdhhc12.L	elk4.S	abcc6.L	setd1a.S
ubap1.L		rab12.S	slc35a5.S				retreg3		mgat1.L	LOC108719562	iffo1.L	rhbdf2.L	adgrl2.L
tmem259.L		dok1.L	pxylp1.S				mgc69520.S		kiaa0100.L	noct.S	snrk.S	dennd5b.L	pkn2.S
blm.L		emilin2.L	c6orf120.L				iqgap3.L		not.L	nr3c1.L	fam89a.L	slc4a11.S	r3hdm1.L
rb1cc1.L		zar1l.L	LOC108705734				otud3.L		ei24.L	Xelaev18034523m	plcl2.S	fam171a1.S	xylt2.L
tcf20.S		rpain.S	znf26				MGC85210		rfx7	clns1a	LOC108718309	diablo.S	zdhhc20.L
jade2.L		vsig10.L	atxn1l.L				larp6-like.1.L		lats1.S	bri3.L	pdzd2.L	ush1g.L	immp1l.L
stk35.S		zbtb37.L	mid1.L				otud7b.S		id2.S	mctp2.L	prex2	pgat.L	srebf2.S
leprotl1.S		LOC108707252	ccdc186				mpi.S		ccnb2.L	tdrd15.L	LOC108719532	atxn7l3.L	rala.L
golga1.L		LOC108709196	fntb.L				mfn2.L		mapkbp1.S	chek1.S	spry1.S	zfyve28.L	wdr24.L
mid1.S		rnf103.L	ppp1r37.L				LOC108714398		dnajc13.S	saxo2.L	baz1a.S	shroom4.L	ocrl.S
smg8.S		kank1.L	srebf2.L				sft2d3.S		ppp1cc.L	ulk2.L	adcy6.S	mocs2	fem1c.L
wdr59.L		Xelaev18013924m	rgs12.S				tmem185a.S		josd1.L	cerk.S	mtfmt.L	slc23a2.L	etv6.L
tmem51.L		leprot.L	ets1.L				sept9.S		baz1a.L	kazn.S	LOC108704278	lysmd4.S	traip.L
vps13d.L		acap3.S	dapk1.S				daglb.L		pcyox1l.L	ccdc69.L	dscr3.L	mark1.S	thumpd3.L
mad2l1bp-like.L		smtn.S	gtpbp2.L				mapk1.L		sbf2.L	LOC100489074.L	fosb.S	cacul1.S	morc2.L
sipa1l3.L		atat1.S	zdhhc9.L				usp31.S		nfatc3.L	bcl6.S	lpar6.S	id3.L	znf292.L
Xelaev18033527m		etv3l.S	pik3r2.S				snx7.S		nek8.S	ndel1.L	zbtb39.S	patz1.S	rab27b.L
rnf219.L		diablo.L	apitd1.L				ncor2.S		dcaf12.L	zdhhc1.L	foxd4l1.1.S	fer.S	cenpi.L
pik3ca.S		dock4	trerf1.L				coq10a.S		LOC108719494	trerf1.S	pnhd.S	gga1.L	jmjd1c.S
rnf44.L		rsbn1l.L	syne2.2.S				slc41a1		hlcs.L	Xelaev18021540m	ccna1.S	sh2b2.L	smad4.2.L
fam102b.L		casd1.L	sos1.L				figla.L		tgfbrap1.L	spice1.L	abo.2.L	clcn3.L	abhd17a.S
mfsd14a.S		rpa2.S	nde1.L				ccdc107		mtus1.L	LOC108719544	admp.L	asphd2.L	ctdnep1.L
sik2.S		ikzf4.S	arhgap35.L				Xelaev18010890m		rai1.L	prr14l	foxd4l1.1.L	xplcg1a	hyls1.S
ttc31.L		bcl6.L	inf2.S				ssh1.L		dusp19.L	slc48a1.S		fam110c.L	znf395.L
tpst2.S		lgr4.L	vcpip1.L				adamts6		cmip.S	pcdh20.S		fhdc1.L	cnot8.L
rhof.S		LOC108703747	otud4.L				septin9.L		fgfr1.S	map3k2.S		tnfaip8l3.S	znf865.L
dhx35.S		zbtb6.S	znf554.L				map4.L		fam110a.S	Xelaev18026797m		Xelaev18042674m	gpsm2.S
plxna3.S		trps1.L	fam73a.L				trappc4.S		zbtb47.S	prdx2.L		LOC100490741.L	senp1.S
b3gnt5.S		stc1.L	kdf1.S				dnajc9.L		ksr1.L	klhl13.S		zfyve9.L	triobp.L
def8.S		ccnb1.S	arf6.L				vegfa.L		ube2z.L	ubxn2b.L		bambi.S	aamp.L
pms2.L		tmem64.L	dlc1				cdkn2d.L		slc9a1.S	LOC108696212		tmem243.L	c19orf44.L
rad17.L		simc1.L	got2.L				wdr20.L		cse1l.L	pgam1.S		egr1.S	ttc4.L
patl2.L		ppm1h.L	rasa2.L				satb1.L		keap1.L	tdrd15.S		stard13.S	ccnh.L
uspl1.S		c8orf88	cdc25a.L				nipa2.S		klhl32.L	myocd.S		lnx2	hyal2.S
mfap3l.L		fbxo43.L	trim8				tanc2.L		rp2.S	stc1.S		zpd.L	tdgf1.3.L
usp46.L		bmp2.S	akap13.L				plch1		LOC108717147	apc2.L		slc41a1.S	dnajb12.S
tubgcp3.L		ptpn3.S	ercc6l2.L				fam219b.L		not.S	cables1.S		Xelaev18008577m	fmn2.L
ttc8.L		hlf.S	fam109a.L				dnmt1.L		disp1.S	ikzf2.S		per2.L	zbtb8a.1.S
e2f4.L		loc100158305.L	ptpn23.L				cdadc1.S		ppp4r1l.L	hes7.1.L		trpm7.S	cep192.L
dnajb14.S		nhlrc3.S	pacs2.L				bcl11b.S		zyg11b.L			LOC108712538	ap1m2.S
plpp6.L		zfp36l2.2.L	dlg3.S				pacs2.S		MGC76328.S			ralgps2.S	hist1h2aa.L
dcun1d3.S		siah2.L	dgkh-like.S				loc100491633.L		neu1.L			slc39a14.S	spire2.S
tle4.S		LOC108699404	mapkapk2.L				MGC84185		ston2.S			id3.S	fam222b.L
nfkbil1.L		ssx2ip.S	c1galt1.S				piezo1.S		klf4.L			tomm40l.L	fastkd3.L
dsc3.S		adrb3.L	abl2.L				bbs9.L		arid5b.L			lhfp.L	tjp3.S
exoc8.S		cbx4.S	cdk5r2.S				Xelaev18025328m		slc35a5.L			frmd4b.L	lrrk1.L
slc39a1l.L		prr14l.L	prpsap2.L				vmac.L		fzd6.L			mylip.L	ammecr1l.S
pag1.S		zfp36l2.1.S	xpo4.S				usp15.L		tmem60.L			grip2.L	med18.S
top1mt-like.L		leprot.S	camsap2				alg1.L		tmem251.L			mkl2.L	asl.L
katnbl1.L		znrf1.L	usp34.S				arhgap11a.2.S		arv1.L			sstr2.L	rab8b.S
nab1.S			ccdc71l.L				ppargc1a.L		larp6-like.1.S			Xelaev18031872m	MGC97820.L
slf2.L			slc35f5.L				ell.L		popdc3.S			Xelaev18029977m	kpna4.S
taf4b.S			cdc37l1.L				tlcd2.S		tmem55a.L			mix1.L	selenon.L
sema4d			pak4				nfkb2.L		tfeb.S			mgat3.L	LOC108719514
sertad2.S			dlc1.S				Xelaev18009472m		mtus1.S			ventx2.1.S	zswim9
arhgap18.L			fdxacb1.L				irf2.L		lurap1.S			ventx2.2.L	setd1a.L
trim8.L			ip6k1.L				mtmr8		arhgap20.S			bix1.1.L	tox4.S
mast4			LOC108719634				wdr20.S		fzd3.L			muc5acl.L	cbll1.S
cdc37l1.S			plin2.S				tmem171.L		clcc1			Xetrov90009976m.L	cep295.S
mb21d2.S			usp8.L				klf12.L		foxi4.2.L			ventx1.2.L	ptp4a1.S
LOC108711716			rfx7.L				gemin5.L		daglb.S			bix1.3.S	phf23.L
kpnb1.L			gpr22l.S				rnf185.S		plpp6.S			btg5.1.S	fam193b.L
hip1r.S			slc4a1.L				rab4b.S		LOC108697345			ventx2.1.L	zfyve27
aktip.L			bri3.S				adamtsl1		klf2.L				LOC108705694
glce.S			pik3cb.S				rpa1.L		arid5b-like.1.S				fam110a.L
mllt1.L			tbc1d4.S				klf12.S						LOC108703815
ranbp2.L			slc35e3.S				gpr75.S						rpa3.S
prmt5.L			dsel.L				tlcd2.L						LOC108712891
fer.L			stxbp6.L				arhgap42.S						stk24.S
bbs2.S			acox2.L				LOC108718785						marveld3.L
bicc1.S			kdm5b.S				tvp23a.S						tctn2.L
gemin5			polr3g.L				slc25a37.S						wdr47.S
arhgef12.L			rab5d.L				loc733728.L						slc7a4.L
socs5.S			dap.L				tmem117.S						fcho1.S
arhgef18.S			lamp2.L				tshz3.S						ifngr2
slc39a14.L			hs6st3				uhrf2.L						edc3.S
ralgapb.L			ccdc125.S				txnl4b.S						braf.L
mast4.S			gtf3c2.L				apex2.L						cep350.L
acap3.L			eif2ak3.S				rdh13.L						twsg1.S
garem1.L			ralgps1.S										dapl1.S
fam53a.S			fbxo33.L										mrps16.L
ccdc171			plxnb3										pphln1.L
mast2.S			pias4.S										cpeb2-like.L
atf7.S			prkch.L										dcun1d5.L
irf2.S			efna5.L										exosc6.L
ncoa6.S			zfyve1										ankrd12.L
thumpd2.L			rab5d.S										fam174b.S
lrp12.S			lrmp.L										rab33b.S
c10orf2.L			fam13a.S										cenpn.S
atg4a.S			rab4b.L										mmaa.L
syap1.S			nr3c2.S										osbpl3.S
ung.L			lpcat2.S										znf391
tmtc2.S			nr3c2.L										slc30a2.L
ankrd52.S			pik3cb.L										LOC108703993
filip1.L			zfpm1										r3hcc1l.L
pbx3			dgkh										atxn7l1.L
uspl1-like.L			adcy6.L										mbip.L
dnajb14.L			jade1.S										camkk1
ino80d.S			aco2.S										dcaf1.L
ammecr1l.L			h2afj.S										amotl1.S
aak1			atf6b.L										mns1.L
kcnj5.L			plekha3.L										wdr45.S
pex12.L			map4.S										ppp2r1a
kazn.L			dync1li2.S										zmynd19.S
arhgef12.S			akap11.L										wasf3.L
usp8.S			lrriq1.L										acvr1b.S
rnf112.1.S			otud4.S										hipk3.L
trak1			haus4.L										tspan15.L
mkl1.S			mb21d2.L										fam222b.S
dact3.S			tmem19.L										phf3.S
akap10.L			fam63b.L										rell1.L
b9d2.L			ccdc69.S										specc1l.S
muc3a			pgam1.L										neo1.S
gtpbp6.S			tmem116.L										sik3.L
etaa1.L			rspry1.L										peli1.S
fam46b.S			slc39a9-like.1.S										oraov1.S
cct4.L			btg3.S										oaz2
cse1l.S			foxi2.S										wdr89.L
tbc1d9			ccnb5.L										cdca2-like.S
ankrd37.S													tollip.S
pigc.S													wnk3.L
lbh.L													zfp91.S
ets1.S													pard3.S
usp15.S													impad1.L
usp44.S													chst12.L
znf335.L													kpna2.L
peak1.L													ctsd.S
arhgef7.L													mnt.S
ippk.S													rest.L
arhgap35.S													plin2.L
zfpm1.S													rab13.L
LOC100127794.L													taf5l.L
prmt5.S													ncor1.S
gm29884													shank2.L
fhdc1													lrrc58.L
map7d3.L													rbpj.L
c11orf96.S													ccdc9.L
haus8.L													gmppb.L
st3gal2.1.L													slc30a4.L
trafd1.L													ppp1r9a.L
smtn.L													lrrc41.S
smad2.S													ntng2.S
plpp5.L													clasrp.L
tbc1d2b.S													ankrd11.L
acaca-like.S													mgme1.S
zfyve9.S													mia3
mink1													peli1.L
znf282.S													lyrm4.L
garem1.S													cdkn2aip.L
grinl1a.L													c12orf66.L
rnf19b.L													cog3.S
fbxo30.S													qrich1.1.L
MGC83539													MGC85120
rsbn1.L													tpra1.S
cnp.L													tbc1d31.L
tnrc6c.S													tiam1.S
tmem170a.S													pcyt1a.S
znf577.S													fbxo42.L
socs6.L													ankrd11.S
lpar5.S													tmem87b.L
cmtm7.S													gpank1.L
stmn1.S													ncoa4.L
scai													polr2f.L
tesk2.S													zfhx4.L
cracr2b.S													spg21.L
ring1.S													nufip2.L
arhgap20													chst13.S
bfar.L													hps4.L
rgs12.L													LOC108698338
klhdc10.L													LOC108701258
fam53c.S													sptssa.S
tor1a.S													fut1.S
idh3a.L													fbxl19.S
kctd9.L													zfyve19.L
rnf149.L													ppp3cc.S
hells.L													MGC85058
disp1.L													snx18.S
tmem57.L													gid4.L
fam104a.S													dennd2d.S
ext1.L													itgb5.S
gsap.L													faim.S
zcchc14.S													plekhm1.L
chmp1a													slc27a4.S
mitd1.L													siah1.S
med13l.S													kiaa0355.L
kiaa1958													zfx.S
ago1.S													lin28b.S
cnksr2.L													hdac4.L
slc30a5.S													keap1.S
ptpn21.S													h1foo.S
ddhd1.L													arl6ip6.L
aak1.S													LOC108697634
ei24.S													taf1a.L
ndst2.L													pias3.S
myo1e.1.L													tfap2c.S
vldlr.S													ccnb1.2.S
slc30a7.S													sepsecs.L
srprb.L													otud3.S
chmp1a.S													gtse1
ncoa7.L													ywhag.S
adh5.L													gas6.L
LOC108695571													LOC100127316
hs3st1													rab20.S
arhgap11a.2.L													plscr1.L
tubg1.L													slc25a19.L
fam53a.L													pigu
gpr63.L													cdyl.L
itga5.S													n6amt1.L
tbp.S													zc3h6
klhl17.L													tdp2.S
pex11a.L													atp10a
spopl.S													il17rd.S
dync1li2.L													atp13a3.L
tanc1-like.L													arl10b.S
rassf3.S													mier3.S
rab11fip1.S													klhl8.L
LOC108708627													mapre3.L
casp9.S													ticrr.S
loc100493164.L													foxj3.S
wdr6.L													fam189a2.L
ppargc1b.L													plk1.L
dnajb9.S													LOC108701428
arhgef17.L													znf770.L
tpst2.L													enc1.S
loc100145507.S													pdk4.S
LOC108714686													akt1.S
r3hdm4.L													kif4a.L
zar1l.S													ncor2
tmem57.S													ppp2r1a.S
Xelaev18030392m													arid1b.L
slc8b1.S													etv6.S
pak7.L													hic2.L
abhd13.S													irf2bp2.S
tmem181.L													lsm14b.S
dock9													klhl22.L
rsbn1l.S													loc100127873.L
tpgs1.L													tmem167b.L
rif1.S													tesk2.L
rin3.L													LOC108695528
sun1.S													rbm26.L
nhsl1													abhd17b.L
klhl13.L													zfand2a.L
ccnb1.L													ncoa6.L
socs6.S													gfod2.L
slc25a37.L													fam49a.S
aldh18a1.L													loc100489386.S
optn.L													afdn.S
cables1.L													znf507.S
aco2.L													foxo3.S
rassf10.S													marchf5.S
kctd3.L													znf41.S
plxnb3.S													uimc1.L
mpp5.S													Xelaev18041850m
arhgap20.L													creb3l2.S
pif1.L													bod1.L
e2f1.S													snx10.S
rnf149.S													march5.L
ppp1r3b.S													rell1.S
tanc1-like.S													mtfr1l.L
MGC131307													arv1.S
styx.L													vps33b.L
them6.L													arf6.2.L
cyld.L													c11orf24
plbd2.L													bbs1.L
fam8a1.L													sdr42e1.L
dand5.L													camsap1
dnajb9.L													pias4.L
znrf1.S													peak1.S
pcnt.L													lats2.S
nlrx1.L													Xelaev18003737m
helb.L													bach2.S
ssx2ip.L													gtpbp2.S
fbxo30.L													cdc14b.S
ptpn21.L													elac1.L
sertad2.L													dab2ip.L
tspoap1.L													cul2.L
txndc9.L													cdkn2aip.S
vldlr.L													Xelaev18000085m
plcl2.L													ca12.L
foxi2.L													cd59-like.L
hs3st1.S													fgd3.S
parp15													zmynd8.S
mob3c.S													pim3.L
LOC108718425													oxr1.L
tpcn2.L													zbed4.L
limd2.S													mier3.L
map3k2.L													tsc22d1
btg4.S													rgcc.L
hprt1.L													lrrcc1.L
cpeb3.S													spty2d1.L
wdr60.L													pde10a.S
camsap1.L													rad1.L
tnfrsf19.S													znf250.S
ago1.L													zrsr2.L
kif13a													slc30a1.L
tbp.L													LOC108719648
pou5f3.3.S													cidec.S
LOC108702912													LOC108719489
c1orf116.L													ing2.L
ikzf2.L													tnpo1.S
LOC108717918													ccdc130.L
ythdc2.L													suco.S
mylip.S													nck1.L
amot.L													morf4l1.S
cyld.S													gab1.S
znf81.L													c10orf35.L
fbxw9.S													znf438.S
pou5f3.3.L													rgma.S
kctd9.S													slc39a3.S
fbxo43.S													nfat5.L
cpeb1.S													ncln.S
akip1													gosr1.L
trim2.L													avpi1.L
btg5.1.L													tmem128.S
kiaa0922.S													map3k8.S
MGC68639													gigyf2.L
aktip.S													stk17a.L
mlh1.S													atxn1l.S
ccna1.L													entpd4.S
rspry1.S													lix1l.S
btg4.L													ildr1.S
LOC108705579													atp8a1.S
cat.2.L													rrm2.2.L
tmem131l.L													rubcn.L
cpeb1.L													irf2bpl.L
cdca7													arf6.2.S
													ric1.S
													nfe2l1.L
													tmem45b.L
													spred2.L
													tmem203.S
													atg4a.L
													ccdc14
													nanp.L
													hps5.L
													syde2.S
													b4galt6.L
													LOC108700788
													phactr4.L
													mief2.S
													setdb2.S
													ydjc.S
													rxrg.L
													gnal.L
													unc5b
													vamp4.L
													vps4b.L
													vkorc1l1.L
													asap2
													timm8a.L
													znf516.S
													mfsd14a.L
													rsf1
													cbfa2t2.L
													vps37a.S
													dnaja4.2.S
													sema6d.L
													dock7.L
													mllt10.L
													sptssb.L
													tmcc3.L
													sik3.S
													ccser2.L
													mgat5
													casc4.S
													klhl20.S
													ifih1.L
													fyn.S
													fam199x.L
													ctsc.L
													thg1l.L
													cyth1.S
													lss.S
													cpeb4.S
													mesdc1.S
													fbxl15.L
													rab11fip5.L
													carf.L
													dnmt1.S
													usp33.S
													march8.S
													sfrp2.S
													erp29.S
													znf238.2.L
													prodh.L
													tbpl1.L
													fzd5.L
													kdm7a
													LOC108703834
													Xelaev18030446m
													fem1c.S
													gpbp1.L
													cep55-like.L
													pomgnt2.L
													rab33b.L
													btg-x
													prkcz.L
													cab39.S
													hbp1.L
													xrcc2.L
													nufip2.S
													atf7ip2
													araf.S
													lrch1.S
													esg2-a
													znf318.S
													Xelaev18028646m
													atl3.L
													angel2.L
													atf7ip.L
													f2rl1.S
													Xelaev18029053m
													zcchc14.L
													cmip.L
													tpcn2
													lysmd3.L
													nodal.L
													gpr160.L
													npat.S
													sbds.L
													furin.S
													adgrl2.S
													chek1.L
													slc46a1.L
													zranb1.S
													abhd2.L
													zbtb8a.2.S
													mycl.S
													usf3.S
													micall1.L
													fzr1.L
													ckap2.S
													rasef
													c12orf66.S
													zbtb26.S
													sys1.L
													crebbp.S
													pds5b.L
													prdm10.L
													kbtbd8.L
													cpeb4
													rac3.L
													ccdc92.S
													nadk.L
													apol1
													tmem107
													tmem136.L
													nedd9.L
													gopc.L
													LOC108708787
													ccr4.L
													kifc3.S
													maz.S
													enox1.L
													ikzf5.L
													dusp4.L
													sdc1.L
													LOC100491090.L
													bcl2l11.L
													lrrc47.L
													fam13a.L
													derl2.S
													araf.L
													tmem189
													elmod2.L
													tbc1d8
													LOC108698716
													foxo3.L
													LOC108701404
													znf644.S
													MGC84581
													bet1.L
													hivep1.S
													tcirg1.L
													gtf2h2.S
													zfand1.L
													snx16.S
													arl15.S
													ifnar2.L
													c21orf91.S
													Xelaev18027888m
													LOC108718446
													ccne2.S
													LOC108711754
													btbd6.S
													pygo2.L
													slc9a7
													phkg2.L
													prdm2.L
													ect2.L
													zdhhc7.L
													slc25a25.S
													mapk1.S
													mfsd8.L
													c5orf30.S
													pacsin3.L
													ino80d.L
													kif7.L
													brd1.S
													brwd1.L
													irf9.S
													klhl12.L
													ppp2r3b.L
													ncs1.S
													tmem18.S
													hsf2.L
													ulk2
													pex6.S
													spen
													ankrd9.L
													mgc75753.S
													cep85.S
													gpbp1l1.S
													med13.S
													plekha8.L
													ago4.S
													aadat.S
													klf2.S
													LOC108705473
													gpbp1l1.L
													pttg1ip.2.L
													mdm2.S
													fam63a.L
													mrps11.L
													sike1.L
													mxd1.L
													pias1.L
													cep57.S
													h1foo.L
													ndrg4.L
													clic1.L
													c5orf15.S
													det1.L
													frmd6.L
													tmed9.L
													kpna2.S
													map3k9.L
													senp7.L
													fkrp.L
													gli2.L
													fn3krp.S
													znf518a.S
													soga1.L
													mfn2.S
													rab7a.S
													tex264
													xrcc6bp1.L
													usp21
													ccser2.S
													wdfy2.S
													slc17a9.L
													insig1.L
													cyth2.L
													slc35g1.L
													rasa3.L
													dedd.L
													paqr3.S
													LOC108695564
													kdm5b
													cdc7.L
													smap2.S
													pdik1l.S
													oat.1.L
													lhx5.S
													fbxo11.S
													pcdh20.L
													wasll.S
													galnt1.L
													otud7a.L
													MGC52683
													plcb1.S
													pik3r3.L
													mrps30.S
													fbxo33.S
													csk.S
													hmgcs1.S
													LOC108709286
													ephb1.S
													nufip1.S
													fndc3a.S
													tmem169.S
													zfand4.S
													hdac2.S
													MGC154819
													ifnar2.S
													znf710.L
													mgll.L
													pdzd8.L
													slc25a51.S
													pcmtd1.S
													glt1d1.L
													wnk1.L
													nf1.L
													bet1.S
													MGC115312
													efna4
													elk4.L
													scn1b.S
													rabgef1
													slc25a16.L
													zdhhc23.L
													tfe3.S
													nasp.L
													MGC98819
													sipa1l3.S
													nedd9.S
													olfm1.S
													wrap73.L
													sirt6.L
													LOC398398
													colgalt2
													map2k4.L
													sox3.S
													aggf1.L
													rnaseh1.L
													stk17a.S
													Xelaev18040055m
													smad9.L
													rasa3.S
													slc25a38
													tmem251-b
													rhobtb1.L
													map1lc3c.L
													tmcc3.S
													gtf3c4.L
													coro6.S
													prkcz.S
													cnppd1.S
													qser1.S
													fancf.L
													ctsc.S
													zbtb7b.S
													ahsa1.L
													pias3.L
													haus2.L
													poc1a.L
													znf367.S
													lhx5.L
													zbtb22.L
													klf17.L
													pacrgl.L
													pim1.S
													anapc10.L
													zbed1.L
													psen2.S
													nbeal2.S
													sdhd.L
													mau2.S
													siva1.S
													znrf2.S
													smad2.L
													tgfbrap1.S
													rab40b.S
													relb.S
													loc100216141.L
													tmem164.L
													arrdc1.S
													vegfa.S
													helq.S
													dtx2.S
													stil.L
													polr2j.L
													spred3.S
													gk.L
													pisd.L
													sema6d.S
													intu.S
													foxh1.2.L
													ccdc71l.S
													ppm1k.S
													fam89a.S
													pim3.S
													pbx3.S
													Xelaev18047698m
													slc6a16.S
													c15orf39.L
													rcbtb1.L
													tmtc2.L
													samd13.L
													coasy.L
													Xelaev18026877m
													nfe2l2.S
													f2rl1.L
													lats2.L
													ttc39a.L
													LOC108712684
													mycl.L
													tesk1
													sema4g.L
													nfkbia.S
													ccdc50
													trappc13.S
													aff3
													loc100145576.L
													cnppd1.L
													plekhf2.S
													bcl2l12.L
													cxcl12.L
													Xelaev18038453m
													orc4.L
													grm1.S
													tmem17.S
													Xelaev18038459m
													klhl26.L
													sike1.S
													rxra.S
													spdyc.L
													Xelaev18032676m
													tnfrsf10b.S
													ipmk.L
													LOC108718134
													gpr45.L
													fam102a.S
													bnc1.L
													fam83d.S
													zbed1
													bahd1.L
													LOC108699405
													Xelaev18040086m
													rgma.L
													LOC495407
													kdm8.L
													sox3.L
													bnc1.S
													sik1.S
													LOC108703781
													LOC108719531
													otx1.L
													tbcel.S
													sod2
													kcnh5.S
													nr1d2.S
													wdr37.S
													rnf185.L
													gpsm2.L
													paxip1.S
													rhog-like.1.L
													immp1l.S
													s1pr5.S
													LOC108719889
													sntg1.L
													Xelaev18027767m
													wbp1l.S
													slc25a43.L
													zbtb8b.S
													mbd2.S
													tgif2.S
													ipp.L
													lpar1.L
													mab21l1.S
													znf628.L
													pcmtd2.S
													tfrc.L
													aste1.L
													arhgap40.S
													Xelaev18014426m
													mpv17l2.L
													thap11
													fgfr4.S
													tfap4.L
													stx11.L
													tmem106b.S
													dtl.S
													bahd1
													nck2.S
													gnb1l.L
													sh2b3.S
													pde4d-like.S
													rab27a.S
													mecr.S
													avpr2.S
													pdgfb.L
													Xelaev18003951m
													grhl3.L
													Xelaev18010010m
													ing1.L
													c11orf96.L
													LOC108703771
													Xelaev18028029m
													csdc2.L
													ccng1.S
													rbm38.S
													tada2b.S
													pced1a.L
													rasef.S
													crtc2.S
													lmo4.2.L
													hn1.L
													ccndx.S
													mpp5
													elmsan1.S
													sh2d4a.S
													LOC108705790
													anapc10.S
													fzd5.S
													pias2.L
													LOC100496010.S
													id2.L
													fgf7.S
													clns1a.L
													pan2.L
													spsb1.L
													hbp1.S
													slc25a38.S
													szl.L
													fam13c.S
													bcor.L
													rab20.L
													zdbf2-like.L
													klf15.2.S
													fgf7.L
													slitrk2.S
													pkd1.L
													zbtb22.S
													rgcc.S
													nr1d1.L
													Xelaev18041239m
													limk1.L
													ing1.S
													psat1.S
													pcmtd1
													c14orf79.L
													spsb1.S
													park7.L
													tm2d3.S
													fgfr4.L
													begain.L
													nsl1.L
													Xelaev18012848m
													nkx3-1.L
													c14orf159.L
													fzd1
													szl
													tm2d2.S
													zfpm2.L
													lfng.S
													rbm24.L
													foxi1.L
													znf883l.S
													akap11.S
													kiaa0141.S
													hhipl1.S
													hes7.1.S
													tfrc.S
													nupr1
													mgat3.S
													rrm2b.S
													tpgs1.S
													rsad2.L
													prdm12.L
													pdgfb.S
													mef2a.S
													fzd1.L
													oxr1
													bcl2l12.S
													LOC108708333
													Xelaev18013146m
													rasl11a.S
													sema4d.S
													htr2c.S
													cr1b
													Xelaev18029627m
													msx1.L
													Xelaev18016928m
													tnfrsf19.L
													tor3a.L
													lrrc40.L
													fzd4
													s1pr5.L
													Xelaev18022505m
													Xelaev18038404m
													Xelaev18036472m
													Xelaev18042001m
													LOC108703460
													LOC108710651

## Sheet: St10.5-11_Increase
List of Genes for all Overlapping Temporal DESeq Groups, corresponding with supplemental figure 3
All_Lineages	Epi-Meso-Neur	Epi-Meso-Endo	Epi-Neur-Endo	Meso-Neur-Endo	Epi-Neur	Epi-Meso	Epi-Endo	Neur-Meso	Neur-Endo	Meso-Endo	Epi	Neur	Endo	Meso
mars2	egln3.L	onecut1.2.S	ccng1.L	hpgd.S	ulk1.S	dlx2.S	gata4.S	gata2.L	carmil3	msgn1.L	cdx4.L	Xetrov90022200m.S	frzb2.L	hoxd1.S
arrdc3.L		npnt.S	cyp27b1.L		c3ar1.L	mcidas.L	gata3.L	znf750.S	bhlhe40.L	apobec2.L	esrrg.L	Xetrov90013256m.L	adamts18.L	hes5_X2.S
zfand5.S		id4.S	efnb2.L		parp3.L	pnck.S	fkbp9.L		otx2.L	t.L	tbx3.S	Xelaev18003120m	vax2.L	hes5_X1.L
		msx2.L	klf10.L		plk2.S	evx1.L	gata3.S		nr4a2.S	frzb.S	cdx4.S	hoxc13.S	LOC108701275	val.L
		aim1l.L	alcam.L		mdm2.L	lmo4.2.S	tbx2.L		irx3.S	pnhd.S	celf3.S	LOC108718650	nell2.L	myom3.L
		rgs2.L			arhgap36.L	LOC100486385.L	sox17b.1.S		g0s2.L	pcdh8.2.L	tcn2.S	tnfrsf6b.L	mmrn2.L	wnt8a.L
		msx2.S			egln3.S	lrrn1.L	sesn1.S		upp2.L	kcnk6.L	nppb.S	dusp10.2.S	mpo.S	t2.S
		capn8.S			txnip.L	mfsd2a.L	tbx2.S		dennd2a.L	wnt8a.S	nptx2.S	wnt7a.S	meox2.S	prrt3-like.L
		pygm.S			ddit4.S	ccn1l.S	ankrd65.L		MGC82989	bmp7.1.S	phospho1.S	Xelaev18002025m	LOC108708140	hoxd1.L
		vash2.S				crabp2.S	vcan.L		gprc5cl1.L	tbx20.L	LOC108699846	ugcg.S	mmrn2.S	osr2.L
		Xelaev18038969m				sspo.L	aplnr.S		Xelaev18000483m	slc5a8.L	mespa.S	gpd1.L	LOC108698145	gnaz.S
		tll1-like.1.L				dhcr7.L	kcnk5		loc108648340.L	gata6.L	LOC108714877	wfdc2.L	cer1	hes5.9.S
		gprc5b.L				sh3d21.L	crp		ralb	lamb3.S	LOC108716948	akap6-like.S	Xelaev18014608m	slc7a7.S
		post7p.L				slc9a3r2.L	loc100494211.L			rbm20.S	ccndx.S	slc45a3.S	LOC108701270	Xelaev18039917m
		LOC100495010.S				lox.S	Xelaev18022564m			lamb1.S	socs4.S	tmcc1.S	ptprq.S	fam3d.S
		post.L				ubald2.L	sox4.S			LOC398451	plaur	sds.S	dmbx1.L	map3k12.S
		post10.L				myc.L	tubb2b.L			spry4.L	LOC108698139		prr18.S	hes9.1.S
		blvra.L				msi1.S	LOC108719633			sebox.L	tbx3.L		loc548390.L	fucolectin.S
		bcor.L				msx1.L	zmcm3.L			foxc1.S	gcm1.L		dmbx1.S	dpysl4
		tuba3c.S				kiaa1614.L	efna1.L			irx3.L	Xelaev18043506m		LOC108700135	umod.2.L
		gfpt1.S				clcnkb	LOC108707322			fgf16	foxn4.L		kcnk10.L	ripply3.L
		hspg2.L				lrrn1.S	slc2a1.L			capn8.1.S	adora2a.S		gypc.L	rab3d.L
		naalad2.S				cdx2.L	gen1			kcnk6.S	smad9.S		slc28a3.L	antxr2.S
		dynll1.L				s100a2	sgk1.S			spry4.S	gjc2.L		Xelaev18009016m	prss23.S
		tubb4b.L				ccdc173.L	cdc42ep4.S			pnhd.L	Xelaev18020076m		LOC108715837	tp73.L
		Xelaev18009838m				klf11.S	fam222a.L			LOC108704696	muc1.L		prdm12	hes9-1.L
		eif4a2.L				prpsap1.S	zhx1.S			tll1.S	pdgfra.L		ntn3.S	vill.S
		top2b.S				bcorl1.S	apeh.L			bmp7.1.L	col17a1.L		arhgap9.L	vtcn1.L
		dynll1.S				Xelaev18012294m	zswim5			crabp2.L	loc108705532.L		LOC108706139	efcc1.S
		atp1b1.S				tgif1.L	scube2.L			nrp2.S	gmnc.L		adamts5.S	theg-like.S
		zfand5.L				crebzf.S	anln-like.1.L			bmper.L	tmem200c.S		LOC108702987	krt12.L
		asb7.L				cltc.L	ptma.S			itga6.S	nanos3.S		myo10.S	krt12.S
		atf4.S				rps9	acvr1.L			gdf3.S	lmo4.2.L		slc16a10.S	Xelaev18041737m
		prpf39.1.S					tgif1.S			myod1.S	rassf10.L		col3a1.S	btc.S
		rpl37.S					ppp1r8.L			foxc2.L	ventx3.2.S		cer1.S	fam83c.L
		wdr83os.L					iffo2			slc29a3.L	samd12		foxe3.S	Xelaev18045499m
		itm2a.L					hexim1.L			mybpc2.L	tmem213.L		tbx22.L	lef1.L
		eif5a.L					ncapd2.S			arhgap27.S	fermt1.S		tmem150b.S	irf5.S
		rps2.L					acvr1.S			dnase1l3	lancl3.S		tac1.L	xk81a1.S
							atp1a1.L			tpbg.L	ptpn14.S		LOC108716719	cdx2.S
							ctps1.S			cpe.L	foxi1.L		gal3st4.5.L	zc3h12c.L
							zbtb21.L			efs.S	cdkn1a.L		adgrl4.S	gnb3.S
							actb.S			syne3.L	ubp1.L		ca7.L	ablim1.S
							noc4l.S			dleu7.L	ulk1.L		nwd2	hes5_X2.L
							rad51ap1.L			lhx1.S	pcdh9.L		tlr8	nek2.L
							gm20188			pvrl1-like.2.S	myb.L		pcca	amotl1.L
							mlec.S			rbm20.L	slc25a22.L		Xetrov90000618m.S	trim29.S
							actb.L			sp5.L	tuft1.L		LOC108719061	lsp1.L
							arf4			rab34.L	c5.2.L		hnf1b.S	pygm.L
							gpcpd1.L			zeb2.S	flrt3.S		LOC108699247	glipr2.S
							exosc5.L			slc6a8.S	dlx2.L		dhrs3.L	LOC108709394
										golm1.L	rbm24.L		onecut1	prss23
										LOC108714317	smad6.2.L		gpx3.S	eya1.S
										dhcr7.S	ccng1.S		aldh1a3.S	ano9.L
										LOC108695829	chrna2.S		dnah7.L	arhgef3.2.L
										mettl7a.2.L	LOC108699131		nkx2-4.L	sult6b1.5.L
										rspo2.L	msx1.S		nck2.L	slc44a3.L
										trim29.L	uts2r		gad1.1.S	fcgbp
										fhl3.L	cdkn1a.S		alpl.S	mov10
										errfi1.L	st8sia1.L		slc4a2.S	krt15
										LOC108709519	t.S		six1.L	znf185.L
										p2ry11.L	notch1		slc5a8	arhgap6
										trpv5.L	LOC108711723		igfbp2	figf.L
										fcn1	mdk.S		dkk1.L	kiaa1217.S
										gata2.S	fzd10.S		cdh11.L	lypd6b.L
										comt.2.S	abcc5		crb2.S	rdd4.L
										tead4.L	ventx3.2.L		LOC108700818	Xelaev18018282m
										LOC108715896	sox18.L		gnrh2.L	LOC108717439
										ist1	xkr8.S		gjb2.L	nxpe2.L
										gne.S	spin1.S		sim2.L	sept5.L
										LOC108704134	agap2		prdm1.S	cdc14a.L
										capn8.2.L	fbxw7.L		LOC108714374	zc3h12c.S
										arhgap39	col1a2.L		irx1.L	tnni2.L
										ppp1r18	numbl.L		gad1.1.L	atp8b3.L
										fzd3.S	mafb.L		ucn1.S	post9p.L
										errfi1.S	nav2.L		angpt2.L	lox.L
										gne.L	ccno.L		darmin.L	rab25.L
										lrp2.L	pidd1.L		frzb-1	tmem138.L
										Xetrov90026715m.L	gss.L		foxc2.S	gdpd1.L
										gli3.L	xfrp		mmel1.L	krt5.7.S
										post5.S	skida1.S		LOC100189574	cdx1.S
										gfpt1.L	myt1.L		LOC108711758	esrrg.S
										loc733735.L	aplnr.L		slc3a1.L	slc45a3.L
										prpf39	cebpa.L		thbs4.S	eps8l2.S
										nipal2.L	smad7.S		matn4.S	Xelaev18027269m
										LOC108715921	cecr1.S		srl	znf474.S
										st6galnac2.S	abhd3.S		pcdh15	bicd1
										stard4.L	tbc1d31.L		LOC101027296	mboat1.L
										lin28a.S	prph.L		admp.L	pnp.L
										hnrnpr.L	id2.L		slc12a3.2.S	syt8.L
										lin28a.L	nefl.L		htr3b.L	fut6.S
										p4hb.L	myc.S		trpc6	otog.L
										dlc1	stard10.S		LOC108695296	paqr8.L
										ddit3.L	anxa4.S		LOC100487423.L	krt.L
										cdk1.S	map1lc3a.L		arx.S	pdlim4.L
										apcdd1.S	id2.S		il10.L	slc30a10.S
										proser1.S	LOC108719506		LOC108701312	ccdc151.L
										amotl2.L	napb		il1r1.S	phox2a
										Xelaev18000128m	kcnc4		LOC108701980	amotl2.S
										krt5.7.L	wdr13.L		bhlhe41	xk81a1.L
										LOC108716735	Xelaev18040635m		fgfr4.S	epas1.S
										top2b.L	mab21l2.S		irx2.L	LOC100496293.L
										chd2.L	arhgef3.2.S		meis1.L	pkp3.S
										gatm.L	txnip.S		Xelaev18015877m	rpe65.S
										LOC108704672	csrnp1.L		cdh6.S	emp2.L
										hspbp1.L	plk2.L		gramd1a.S	dlx3.L
										dedd2.L	relt.L		LOC101735011.L	LOC108708348
										akap12.S	mob2.2.S		sfrp2.L	nr6a1.L
										cnn1.L	sesn1.L		slc3a1.S	shroom3.L
										alg2.L	notch1.L		foxb1.L	mab21l3.S
										cdca3.L	klf10.S		arx.L	LOC108711244
										xkr5.L	rap2b.L		kmo.L	styk1.S
										rassf1.L	pdgfa.L		fgfr4.L	ablim1
										ptmap12.S	tuba4a.S		kng1.L	kctd15.S
										trpm4	fam84b.S		LOC108705874	tsku.S
										tubb	ndufa8.L		fbn3.S	slc22a4.L
										cpne3.L	loc100487575.L		abcb5	cbr1.1.L
										arpc3.L	mxi1.S		nlrc4.L	LOC108719420
										cdk1.L	LOC108695556		dkk1.S	rbm38.S
										rreb1.L	tuba4a.L		fst.S	dlx3.S
										mettl7a.L	MGC82975		slc12a3	ptk2b.S
										btg1.L	fpgs.S		meox2.L	Xelaev18003060m
										smo.L	sertad1.S		trim54.L	c2orf68.L
										rbms2.S	otud1.L		il1b.S	LOC100486385.S
										herpud1.S	esco2		iqca1.L	efhc1.L
										ccnb3.S	slc7a5.L		ctnna2	kctd15.L
										Xelaev18022168m	hid1.S		LOC108714422	rnf165.S
										tmem127.S	cass4.L		Xelaev18031226m	epn3.L
										lrwd1.L	mbd6.L		foxc1.L	lpar2.L
										LOC108713945	scube2.S		ntrk2.S	MGC52622
										ahnak.L	e2f7.L		irx5.L	gpr143.S
										sptan1.L	fbxl20.S		znf385b.L	tusc2.S
										creb1.S	pdk4.L		LOC108716401	klhl25.L
										esyt2.S	acer2.L		dhrs3.S	znf644.L
										itpka	grx5		LOC108701392	zbtb46.S
										b4galt3.L	mesdc1.S		foxd2.S	shroom4.L
										ap1m2.L	vwa5a.L		igf2.S	cdh26.S
										rarg.L	sec14l1.L		nrp2.L	MGC83169
										znf740.L	arrdc3.S		ccl19.L	b4galnt3.L
										cks1b.S	rap2b.S		ptprb.L	slc9a2
										aurka.L	rnf11.L		adgrb2.S	pprc1
										znf740.S	LOC100158389		ggt5.L	LOC108717200
										plpp2.L	myl9.L		LOC108698356	pvrl4.S
										LOC108719789	znf292.S		nipal2.S	MGC80993
										kif11.L	ube2c.S		inpp5e-like.S	fam177b.L
										LOC108710484	luc7l2		serpinb10.S	sphk2.S
										top2a.L	pcf11.S		cdc14a.S	degs3.L
										hspa8.L	katnal2.L		Xelaev18011723m	fzd3.L
										kif11.S	ubb.L		Xelaev18033386m	LOC108700036
										znf282	ppp1cb.L		etv2.S	tnfsf10l.L
										cdh1.S	rpl27a.S		phka2-like.S	fer1l4
										tm9sf3.S	mcl1.L		neto1.S	gmps.L
										LOC108715172	ier2.L		nkx2-3.S	Xetrov90014299m.L
										arl4c.S	znf318.S		xarp.L	slc7a4.L
										polr2h.L	LOC108695506		LOC108696971	specc1l
										lsp1.S	rps2		gngt2.1.L	ube2n.L
										isg20l2.S	msl3.L		frem1	upk3b.L
										sap30.S			hmcn2	scnn1a.L
										LOC108706589			arhgef38.S	dgkd-like.L
										upk1b			abca1.S	Xelaev18006613m
										ptma.L			LOC108714284	gnb3.L
										ckap4.S			fam83b.L	gpatch4.S
										loc728026.L			cntn1.S	Xelaev18017809m
										ift46.L			prdm14.L	ndufv2.L
										hspa8.S			gata5.L	LOC108701168
										lig3.L			LOC108718210	rps6ka4.L
										ccnt2.L			ncmap.S	efcab6
										rbmx.L			Xelaev18012290m	kpna2.S
										LOC108711131			fkbp9.S	rhbdl3
										leng8.L			cmtm3.L	ssr2.L
										isg20l2.L			pcdhac2.L	ccnl2.S
										cbx1.S			vwf.L	nrbp2.L
										tjp2			LOC108704005	hspa13.L
										cirbp.S			fyb.S	slc22a31.L
										luc7l3.S			caskin2.L	yeats4.S
										lrig2.L			trabd2a	itga6.L
										hpgd.L			diras3.L	LOC108701721
										cdc34.S			lmo1.L	LOC108701743
										eef1a1.L			manea.S	sp7.S
										nsep1			slc34a2.S	efs.L
										rnd1.L			arhgap4.L	LOC108715136
										yeats4.L			tmem150b.L	hes6.1.S
										eef1a1o.S			cnrip1.L	fgfr1.L
										wdr12.L			sfrp2.S	etaa1.S
										has1.S			hoxa7.L	hes6.1.L
										litaf.S			alcam.S	mta1.L
										leprotl1.L			msra.2.L	ephb3.S
										hmgn1.S			ddr2.L	LOC108700400
										mplkip			wwc3.L	ccnb3.L
										tcf12.L			Xelaev18023152m	Xelaev18005230m
										rbmx.S			lrrn3.L	slc9a3r2.S
										m6pr.L			mapk8ip1	LOC108702448
										hnrnpa1			kif26a.S	chrna2.L
										caprin2.S			krt2l.L	loc100497729.L
										slu7.L			hoxa9.L	gnai3.S
										ywhae.L			dmpk.L	farp2.L
										rpl26.L			nrdc.L	guk1.S
										rps21.S			Xelaev18016371m	sec61a1.S
										luc7l2.S			hic1.L	LOC494849
										myef2.S			LOC100496837.S	dip2a
										has-rs.S			fst.L	fgfr1.S
										MGC81028			Xelaev18035766m	cfp.L
										rpl17.S			hesx1.S	rbbp8nl.L
										a2m.S			prdm12.L	chsy1.L
										rpl34.S			LOC108717763	nxpe3l.6.L
										stx6.S			map1b.S	elavl3.L
										myef2.L			chst3.S	fam212a.S
										psmg1.L			otx1.S	arhgef19.L
										khdrbs1.S			jam3	cfap52.L
										xetrov90011961m.L			lmln	slc25a29.S
										tdg.S			gata4.L	tmem208.S
										rps9.L			skida1.L	slc17a9.L
										upk1b.S			greb1.L	utp15.S
										hnrnpa2b1.S			gpr1.L	evpl.L
										herpud1.L			LOC108714308	elf1.S
										rpl17.L			reps2.S	Xelaev18036390m
										cirbp.L			barhl2.S	ube2n.S
										rps6.L			loc100496187.L	hkdc1.L
										rps3a.L			vtn.L	clk2.L
										tmem52.L			notch2.S	b4galt3l2.L
										mcrs1.S			cdh2.L	lzts2.S
										gtpbp4.L			plekhf1.S	trpv6.L
										slc25a17.L			LOC108716925	zfp36l1.L
										plekhj1.L			slc26a4.L	nckap5l.S
										prmt1.S			foxa1.L	znf462.S
										c2cd2.S			lrig1.L	selk.S
										pars2.L			xmc.S	xab2.L
										hmgn1.L			plscr3	vangl1.L
										eif4a1.L			pcdh18.L	bpgm.L
										hmgb2.S			LOC108715287	esrp1.L
										ldb1.S			col21a1	slc35c1.L
										rbm45.S			LOC108706759	c5orf15.S
										hps3.L			megf6.L	tprg1l
										hnrnpa1.S			LOC108704058	tead4.S
										rps4			epha7.L	rybp.L
										hmgb3.L			astl2d.3.L	ubald2-b
										anp32c.S			LOC108701458	ptger4.S
										MGC83421			lmo1	tceb3.L
										spint2.L			foxd2.L	tmem238
										MGC52578			LOC108700983	c14orf79.L
										hnrnph3.L			fmnl2-like.S	leng8.S
										ywhae.S			ttn	cnn1.S
										rpl7a.S			avp.L	cdca5.S
										rpl7.L			c4orf45.L	fam195a.L
										hdlbp.L			Xelaev18043356m	sbspon
										hmg-17			Xelaev18010194m	myl6.S
										rps3a.S			Xelaev18032606m	MGC85058
										sec61b.L			mettl24.L	LOC108709581
										tpt1.L			tyr	esrp1.S
										net1.S			schip1.S	znf653.L
										hnrnpab.L			tcim.L	b3gnt2.S
										smarce1.S			slamf9	vhl.S
										sf3b5.S			pitx1.L	dsp.L
										hnrnpdl.L			LOC100494033.L	tuba1cl.2.S
										brix1.S			pip5k1b.L	pdxdc1.L
										srsf7.S			tmprss4.L	stard10.L
										smim19.L			foxq1.S	twsg1.S
										hmgn2.L			Xelaev18011724m	rpf1.S
										arl1.L			rnf223.L	cdca5.L
										rpl7			lrfn1.2.S	elmo1.L
										srsf3.S			Xelaev18032557m	LOC108702843
													a2ml1.L	upk1b.L
													cdc25b.L	ythdf2.L
													LOC108713993	slc2a2.L
													shox2	LOC108713924
													nog.L	eif4a1.S
													LOC108719572	arhgef3.1.S
													rnf24.S	lrrc1.S
													robo2	tuba4b.S
													LOC101731753.L	muc5b
													xarp-like.S	prc1.L
													Xelaev18000592m	slc35a2.L
													calb1.L	zc3h15.S
													fam72a.L	tm9sf2.L
													dnah6	spsb4.L
													slc38a3	gmeb1.L
													ptch2.S	msi1.L
													vstm2b.S	zfp36l1.S
													trim63.S	elf1.L
													mboat2	srp19.S
													capn13.S	eif4e.L
													hmcn1.L	chmp1b.L
													LOC108703371	LOC108698339
													LOC108700903	utp6.L
													sidt1.S	cnot9
													LOC108696753	ccnj.L
													ror2.L	elovl7.L
													LOC108716776	fsbp-like.L
													Xetrov90020413m.S	ccser2.S
													twist1.S	nr2f6
													LOC108713771	eef2.1.S
													hdac9.S	hgs.L
													jund.S	c10orf88.L
													rasgrp2.L	chmp4b.S
													shox	bloc1s1.S
													nceh1.L	ndufv1.L
													prdm15.L	upk3a.L
													Xelaev18024399m	srsf2.L
													chrd.2.L	LOC108719545
													lama2	cdc34.L
													clca3.L	hmgcr.S
													enc1.2.S	upk1a.L
													aff2.S	scaf1.L
													ednra.L	ywhaq.S
													col13a1.L	rpap3.L
													Xelaev18007821m	prpf39.1.L
													bhlhe22.L	kansl2.S
													chsy3	rfng.L
													mecom.L	bmp7.2.L
													Xelaev18017910m	eif3e.L
													lypd6.L	rrp12.S
													pcdh11x	rhbdd2.S
													ppl.L	apex1.S
													artn.S	arf1.S
													ndnf.L	ostc.L
													ptch2.L	MGC64308
													ckmt1b.S	ssr1.S
													ralgds.S	rpl13.S
													sgk223.S	cysrt1
													jhy	lypla2.S
													ptchd4
													p4htm.L
													phox2b.L
													arl8a.S
													MGC86526.S
													btbd6.L
													moxd1.S
													notch2.L
													emx2.S
													alpl.L
													Xelaev18020631m
													sncg.S
													nrsn1.L
													cfh.L
													foxd1.S
													cdx1.L
													mafa.L
													Xelaev18008648m
													sema4b.L
													LOC108698354
													a2ml1
													wfdc8
													ca7.S
													Xelaev18029191m
													foxd3.S
													slc26a9.L
													fli1.S
													eya1.L
													LOC108703373
													olig4.L
													limd2.L
													rbfox3
													ca14.L
													pcsk9.L
													Xelaev18039582m
													p2ry1.L
													zic5.L
													sema6a.L
													slc10a3.S
													jakmip2.L
													LOC108715064
													LOC108706875
													arhgef40.S
													fgfr2.S
													LOC108698306
													nwd2.S
													dennd2c.S
													metrnl
													cd163
													lmo3.L
													ror2.S
													pcbp2.S
													nr2f2
													cyp26a1.L
													kiaa1217.L
													LOC108701786
													bcl2l10.L
													vcan
													rap1gap2.S
													rnd3.S
													admp.S
													hoxb6.S
													fn3k.L
													LOC108717899
													Xelaev18026908m
													akap12.L
													rnf125.S
													LOC108697537
													LOC108718065
													chrd.L
													wnt5a.L
													fndc3b.S
													akap2.S
													hmx3.L
													tlx3.L
													stard5.S
													slc44a5.S
													dgka.L
													acsf2.S
													hao1.L
													dixdc1.L
													cep63.S
													LOC108715350
													slc38a8.L
													LOC108698349
													mgc69520.S
													s1pr1.S
													cdh2.S
													armc4.S
													akap2.L
													enc1.L
													slc34a2.L
													adgrb2.L
													ggt1.L
													cep63.L
													meis2.S
													ctsf.L
													itga2.L
													prom1.L
													LOC108720035
													stk40.L
													scel.L
													cebpa.S
													sema6a.S
													phox2b.S
													crb2.L
													rasgef1b.L
													Xelaev18001986m
													zeb2.L
													tbr1.S
													tmem116.S
													tmprss9.L
													prdm1.L
													ror1.L
													Xelaev18012292m
													plcb2.L
													dhh.S
													Xelaev18043812m
													fgf16.S
													sowahc.S
													hsf3
													prtg.S
													ly9
													slain2.L
													LOC108718211
													prkx.L
													micu3.L
													meis3.S
													pkp1.L
													LOC108708347
													irx1.S
													dcbld1.S
													saxo1
													enpp2.L
													kit.S
													Xelaev18012280m
													sall3.S
													LOC108704158
													cebpd.S
													LOC108696302
													reln.L
													mpzl2.L
													cnksr1.S
													LOC108706398
													LOC100498184.L
													col5a1.L
													kdr.L
													cd5l
													Xelaev18023478m
													mospd1.L
													pkdcc.1.S
													enc1.S
													LOC108716739
													sema4a.S
													slfn13.L
													zic5.S
													flt1.S
													aldh1a2.S
													tril.L
													c8g.S
													fut3.L
													mmp14.L
													isl1.L
													foxa2.L
													foxd3.L
													sox11.L
													fli1.L
													Xelaev18002117m
													kl.S
													dmrt2.L
													clcn5.L
													rab15.L
													retn.2.L
													Xelaev18022404m
													stx3.L
													gpr4
													mmp1.S
													crx.S
													spsb4.S
													nuak1.L
													sox11.S
													LOC108708225
													col9a2.L
													st3gal1.L
													gramd1a.L
													mn1.S
													arrdc2.S
													fth1.L
													slc30a8.L
													LOC108705469
													gatm.S
													emx2.L
													hsh2d
													slc4a4.S
													metrnl.L
													cdc25b.S
													slc25a24.L
													fhl3.S
													fam3a.S
													ugp2.S
													nkd1.L
													fzd10.L
													LOC108712518
													fam57a.L
													nxpe2p1
													fam13b.L
													acer1.L
													flrt2.L
													ptprr.L
													bcor
													gatd3b
													tbx6
													maob.L
													rsph1.L
													stk40.S
													mttp
													rapgef5.L
													itgb8.L
													chga.S
													LOC108715348
													palm.S
													birc2.S
													LOC100487499.S
													dact1.S
													LOC108718667
													smc2.S
													noxo1.1.L
													sox10.L
													tes.S
													znf608
													hes1.L
													znf608.S
													ampd3.S
													slc6a14.2.L
													znf503
													LOC108700879
													vstm2b.L
													mmd.L
													MGC81337
													wfdc1.L
													Xelaev18005924m
													gjb2.S
													arhgef26.S
													atp1a1.S
													arhgef38.L
													tnfrsf19.L
													lrp10.L
													Xelaev18036963m
													Xelaev18027048m
													cyp27c1.S
													maats1
													cemip2
													pycard.L
													Xelaev18009472m
													tmprss9.S
													LOC108708252
													fkbp10.S
													slc26a5.L
													skor1.S
													hs6st1.S
													lpin1.S
													pced1a.S
													dysf-like.L
													Xelaev18012293m
													ccne2.L
													hprt1
													MGC82544
													fbp1.L
													sema5b
													sp8.S
													MGC81482
													schip1.L
													lfng.L
													trim36.S
													loc100494211.S
													LOC108698800
													foxb1.S
													fzd2.S
													ccnd1.S
													draxin
													rdh10.L
													armc1
													loxl1.L
													krt18.S
													esr-5.L
													hes3.1.S
													btg2.S
													rasa3.L
													tfap2b.S
													LOC100495222.1.L
													gadd45g.S
													arl6ip1.L
													slc8a1
													lama3.L
													zic3.L
													rhpn2.L
													loc108718659.S
													il11ra.L
													cdk15.L
													pcdh10.S
													mig30.L
													calb2.S
													phlda1.S
													rps21.L
													slc2a13.S
													chrd
													fndc3a.L
													prr5l.L
													LOC108713032
													arrdc2.L
													spata13.L
													LOC108699553
													LOC108717369
													fzd2
													LOC108713701
													LOC108707159
													sdc4.L
													dnajc6.L
													fank1.L
													zfhx3.L
													id3.L
													kcna3.L
													LOC100489554.L
													hlx
													hs6st1.L
													vit.L
													anxa6.L
													crebl2.L
													dlx5.L
													sdhaf2.S
													LOC108696274
													clcn2.L
													loc733726.L
													LOC108720014
													anxa2.S
													mob2.2.L
													plxna2.S
													nkain1.L
													ccdc63.S
													sall1.L
													tmem52.S
													LOC108719253
													klrc4-klrk1
													tpr
													sh3rf2.S
													wdr83os.S
													dedd2.S
													LOC100490918.L
													afap1.S
													sox17a.S
													fam102a.L
													nuak1.S
													Xelaev18024458m
													bpi
													gpr143.L
													cacnb4.S
													hao2.L
													ndufa8.S
													cfb.L
													LOC108708517
													Xelaev18038622m
													nek6.S
													aldh1a2.L
													LOC108710017
													camk1g
													dact1.L
													LOC100497556.L
													tiprl.L
													cd99l2.S
													adamts1.L
													tmem238.S
													pcdh7.L
													wwc1.L
													fgfrl1.L
													guca1a.S
													abca8.L
													gsto1.S
													piezo2
													dfna5.L
													cdc42bpa.S
													chrm4.L
													irx2.S
													zswim6.S
													Xelaev18035319m
													nxpe3
													ifltd1.S
													lgr5.S
													tbx1.S
													LOC108705424
													plekhn1.L
													Xelaev18047094m
													LOC108710853
													bcor.S
													ralgds.L
													Xelaev18037856m
													LOC108701162
													fmc1.L
													zic2.S
													pkdcc.1.L
													wwtr1.S
													ahnak.S
													azin2.S
													suox.S
													klf6.S
													unkl.S
													Xelaev18044534m
													popdc2.L
													foxa1.S
													cml
													rai14.L
													Xetrov90026452m.S
													cdc42se2-like.1.L
													wsb1.L
													fzd8.L
													rgs16.S
													hmgcl.S
													celsr1
													rps21
													fbxo32
													fbn3.L
													nr1i2.L
													creb1.L
													LOC108701311
													krasl.S
													dhx32.L
													slc22a23.L
													gata6.S
													MGC53707
													tub.L
													adap2.L
													slc7a3.L
													ilk.S
													mn1.L
													bmpr1b.L
													LOC108700186
													lgals3.S
													cmtm8.L
													Xelaev18042341m
													Xelaev18018260m
													phldb1.S
													hal.1.L
													znrd1.L
													LOC108713946
													ras-dva1.L
													ubxn11.S
													lmo4.1.S
													spsb3
													plekhg5.S
													plscr3.L
													skor1.L
													Xetrov90029963m.L
													LOC108718070
													mst1.L
													cmklr1
													six4.S
													LOC108698123
													prss27
													atp1b3.S
													wnk2
													slc9a3.L
													map3k14.S
													usp43
													lsm4.L
													fblim1.L
													LOC100489887.L
													angpt4.S
													Xelaev18027991m
													pou5f3.1.S
													map1lc3b.L
													cfap100.L
													wdr12.S
													LOC108698884
													LOC100036994
													LOC108709398
													ahcyl2.S
													nr2f6.L
													LOC108709568
													st3gal5.S
													fxyd3
													emg1.L
													atp1b3.L
													LOC108697654
													rbl1.L
													mig30.S
													Xelaev18003895m
													fzd8.S
													zic2.L
													pou5f3.1.L
													scaf4.L
													tcf7l1.L
													znf451
													svip.S
													camta1
													col9a3.L
													golm1.S
													crx.L
													Xelaev18002446m
													ras-dva1.S
													ovol2
													pabpc4.L
													LOC108708446
													LOC108706721
													nfil3
													ednra.S
													marcksl1.L
													LOC108715723
													apoc1-like.L
													cyp27a1
													mdga1.S
													MGC52759
													LOC108717895
													tprkb.S
													LOC108709763
													rin2.L
													otx1.L
													mrps10.L
													tomm7.L
													cdk2ap2
													asic1
													sulf1.L
													znf180.S
													LOC100127323
													tiprl.S
													Xelaev18017186m
													rbm5.L
													nxpe4
													tacc3.L
													znf800.L
													MGC84194
													LOC108710532
													pcdh8l.S
													pitpnc1l.L
													rasd1.S
													spns2.L
													lpin1.L
													spns2.S
													grasp.S
													LOC108697415
													cldn23
													e2f8.L
													rpl26.S
													mcm6.2.L
													lrig3.L
													fn1.S
													ccdc71.S
													krt8.S
													c17orf58.L
													plekhn1.S
													sppl3.L
													ag1.L
													cinp.S
													kirrel2.S
													prnp
													rpl29.L
													otx2.S
													Xelaev18017103m
													rtkn.S
													irf2bp2.S
													hsd17b6
													loc108715171.S
													lamtor3.L
													c1orf198
													tcf7l1.S
													gnai2
													LOC108706094
													shfm1.S
													cyp27a1.L
													fdft1.S
													cyp26a1.S
													emp2.S
													stc1.L
													ank3
													ppp1r14a.L
													LOC108718018
													greb1l
													Xelaev18006002m
													Xelaev18011097m
													rbms2.L
													adamts1.S
													prelid1.S
													LOC108704271
													hunk.L
													tmsb4x.L
													plcl2
													kmt2e.L
													rbm12b.L
													loc100494818.S
													smad4.1.L
													lrp10.S
													cyb561.L
													rps12.L
													rpl17-c18orf32
													cotl1.S
													slc2a1.S
													map1lc3b.S
													sacs
													aplp2.L
													armc7.L
													cox17.L
													kiaa0247
													prdx5.L
													LOC108704252
													tiparp.L
													march7.S
													phf1.S
													msto1.L
													pgbd4
													cdon.L
													Xelaev18032193m
													actn1.L
													LOC108718254
													LOC108708226
													rpl35a.L
													rpl37.L
													dennd2c.L
													mis12.L
													nudt22.L
													mypop.S
													tmpo
													LOC108709261
													march6.L
													ints6l
													irs4.L
													uqcrq.S
													cdc42ep2
													ankrd50.S
													spcs1
													znf208
													hist2h2ab.S
													timm17a.S
													rps7
													rpl32
													LOC108708564
													dnah5
													slc27a3.L
													gpc4.S
													khdc4
													spred2.L
													c6orf62.S
													vmp1.L
													sh3d19.L
													MGC80567
													hunk.S
													dyrk2
													atf7ip2
													rfwd3.L
													traf3ip1.L
													slc25a29.L
													pkn1.L
													vamp8.S
													stox2.L
													six4.L
													psd3
													rbm12.L
													grasp.L
													eef1b2
													knl1
													pbx2.S
													prpf8
													plgrkt.L
													anln.L
													mcoln1.L
													cidea.L
													epha4.L
													fgd1.S
													rpl23.S
													rps23.L
													susd6.L
													Xelaev18022009m
													tgif2.L
													rpl31.L
													cfap57.L
													LOC108711622
													enoph1.S
													gtf2ird2
													gosr2.L
													zmym1l.S
													rrp8.S
													tmem45a.L
													slx4.L
													cpt1a.L
													lsm4.S
													cox7c.S
													cbx5.L
													utp15.L
													mgc75753.L
													itgb1.S
													ccng2.S
													LOC108704245
													ephb4.L
													rpl30.L
													zbtb39.L
													larp6.S
													melk.L
													ckap5.L
													cables2.L
													cdc42ep2.L
													pcdh19
													LOC108709832
													Xelaev18038498m
													lrp5.L
													kiaa0232.L
													utp18.L
													LOC108702825
													zdhhc21.S
													mixer.S
													mixer.L
													litaf.L
													LOC108695521
													f3.L
													rapgef2.L
													LOC108719535
													LOC108705994
													znrf3.S
													rps7.S
													cdca4.S
													sdc4.S
													xenf
													rbm14.L
													col4a5.S
													lpcat1.S
													irs1.S
													endou.S
													LOC108717924
													foxn3.L
													ubap2.L
													ssfa2.L
													LOC108704423
													ephb3.L
													marcksl1.S
													sfpq.L
													hdgf.L
													hexim1.S
													pfas
													fam179b.L
													1600014c10rik
													ctps1.L
													gng7.L
													rps16.S
													dpm2.L
													gsk3a.S
													mgc145260.L
													smg1.L
													sesn2.L
													git1.L
													LOC108711813
													phc1.S
													rps29
													rpl36.S
													rps20.L
													col18a1.L
													gigyf1.L
													enc1.2.L
													rps3.S
													dusp6.L
													fbxo5.L
													asb7.S
													kmt2e.S
													kpna2.L
													ago2
													rbm34.L
													rbm45.L
													kiaa1210.L
													LOC108697833
													cited4.L
													cpeb2-like.L
													abcb9.L
													cerk
													maff.S
													elmo1.S
													adgrg1.S
													hnrnpl.L
													zc3h10.S
													esg2-a
													sik3.L
													hist2h3d.L
													Xetrov90029311m.S
													LOC108715449
													ctc1
													chn1.L
													fnbp4.L
													fgd1.L
													c6orf62.L
													arfgap3.S
													fam193a.L
													klf6.L
													ncstn.S
													paaf1.S
													ncl.S
													zc3h10.L
													rbl1.S
													rps16.L
													loc100494818.L
													rps19.S
													cep250.S
													midn.S
													rpl8.S
													aasdh.L
													ago2.L
													isy1.L
													mat2a.L
													rab26.L
													auts2
													fth1.S
													cenpc.L
													gpatch8.S
													rps20.S
													brd2.S
													znf268.L
													nop10
													kiaa0232.S
													dgkd-like.S
													setd1b.S
													LOC108715080
													rps25.L
													midn.L
													wdr43.L
													tle1
													dzip1.L
													fzd7.S
													hnrnpu
													sp5l.S
													fam174b.L
													h3f3b.L
													actr6.L
													ddias
													rxrb.S
													prkca.S
													trim71.S
													inpp5k.L
													slc26a11.L
													h2afz.L
													zfand4.L
													rpl37a.L
													kcne5.L
													hp1bp3.L
													xetrov90011961m.S
													scin.L
													fus.L
													parp1.L
													rpl13a.S
													rps6kb1.L
													kat5.L
													hnrnpu.S
													itga5.L
													kmt2a.S
													timm23
													rere.S
													elf2.S
													rplp2.L
													adam33.L
													krt8.L
													MGC114789
													metrnl.S
													tsc22d2.S
													uqcr11
													zbtb2.S
													sema3f.L
													aurkb.L
													ubc.L
													pdia4.L
													fau.S
													rnf38.S
													runx1t1
													pls3.L
													ost4
													gnb2l1
													vdac1.L
													sema4c.S
													rpl38.S
													lamc1.S
													tmem111.L
													rps29.S
													mzt1.S
													ufc1.S
													zswim6
													scamp5.L
													lhx1.L
													rpl28.S
													actg1.L
													gigyf1.S
													hhex.L
													srsf5.L
													rpl23a.L
													rbm5.S
													eif3a.L
													sec61g.L
													phrf1.S
													rps6.S
													yipf6.L
													LOC108706318
													cd82.S
													pin4.L
													krt18.L
													ybx1.S
													ctbp2l.L
													psmc5.L
													usp1.S
													fam162a.S
													rps15.S
													kansl2.L
													phactr4.L
													rps3.L
													clcn3.L
													selenok.L
													sf3b6
													LOC108703741
													ier3ip1.L
													dynlrb1
													plk4.L
													mgea5.L
													actg1.S
													rpl18a.L
													tfdp1.L
													mapre1.S
													slc25a5.L
													nadk2.S
													pqbp1.L
													sfpq.S
													Xelaev18002313m
													rps10.L
													rpl15.L
													h3-3b
													mtfr1l.S
													snrpg.S
													hmgn3.S
													sem1
													rps27a.L
													rhebl1.L
													pdlim1.S
													rpl6.L
													c21orf91.L
													txndc15.L
													esyt2.L
													rpl9.L
													myo10.2.S
													hnrnpa3.S
													srrt.L
													Xetrov90014406m.L
													LOC108715139
													LOC108707719
													rpl22.L
													gtf2b.L
													gsk3a.L
													magoh.L
													hnrnpk.L
													cldn4.L
													setd5
													MGC82657
													ppia.L
													ilf3.L
													safb.L
													rarg.S
													hnrnpdl.S
													arid4a.L
													ube4a.L
													h2afz.S
													snrnp200.S
													ckap4.L
													mtf2.S
													npm1.L
													lamc1.L
													tceb3.S
													ptbp1.L
													sf3b2.S
													psmc6-b
													anp32e.L
													vps25.L
													LOC503678
													nucks1.S
													cbs.L
													cfap36.L
													tra2a.L
													srsf11-like.S
													myl12b.S
													no38
													cldn6.1.S
													sri
													cox7c.L
													eif4e2.L
													tmed8.S
													znf106.L
													selenow1.L
													ubap2.S
													hnrnpa0.L
													sox17a.L
													acta2.L
													cwc25.L
													LOC100191024
													MGC81393
													sgk1.L
													rps25.S
													rab40b.L
													phf5a.L
													snrpd1.L
													ski.L
													rhov.L
													pabpc1.S
													hnrnpa3.L
													khdrbs1.L
													med13.L
													ddx39
													igf2bp3.S
													anxa1.S
													nop16.L
													gatad2a.S
													srsf4.L
													oaz1.S
													hsf2.2.L
													sec61g.S
													ilf2.L
													sbno1.L
													rpf1.L
													clcf1.L
													rhebl1.S
													syf2.S
													odc1.S
													elob
													tomm70a.S
													eif1b
													cript.S
													mlec.L
													fam32a.L
													tulp3.L
													nsa2.L
													psmd1.S
													nop58.S
													elavl1.S
													pcnp.S
													rpl35
													cuta.L
													u2af1.S
													sap18.L
													rpl7l1.L
													hnrnpa2b1.L
													gnl3.L
													hmgn3.L
													phf5a.S
													vezf1.S
													gnas.L
													tomm5.L
													sumo2.L
													rps12.S
													hnrnph1.S
													hnrnpk.S
													sec13.S
													dcun1d3.L
													psmc5
													ctbp2.S
													ddx47.L
													cst3.S
													dhx15.L
													mrto4.S
													erh.L
													hnrnpll
													znf638.L
													nop10.S
													bcas2.L
													cited4.S
													paxip1.L
													epcam.L
													ubb.S
													phc1.L
													thoc7.S
													hnrnpm.L
													prdm15.S
													tuba1c.L
													tnpo3.L
													ssbp3.L
													LOC495376
													epcam.S
													MGC84691
													rpl6.S
													cdk9.L
													ebna1bp2-a
													nol7.L
													snrpd3.S
													ran.S
													ankrd11.L
													selt.S
													psmd6.L
													nucks1.L
													hnrnpa0.S
													ndc80.S
													nfkbia.L
													pmpca.S
													lrig3.S
													rreb1.S
													elavl1.L
													sf3a2.S
													gabpa.L
													bzw1.S
													u2af1.L
													polr2c.S
													prmt1.L
													anp32c.L
													hsbp1.L
													ftmt.S
													psmc6.S
													ddx23.S
													anp32e.S
													LOC108701212
													rbm33.S
													hspe1.S
													hmgb3.S
													cdca4.L
													snrpd3.L
													snrpf.S
													mfap1.L
													ranbp1.S
													rbm8a.L
													h3-5.L
													znf706.L
													arf1.L
													msantd4.S
													txnl4a.S
													drap1.S
													sf3b2.L
													hnrnpab.S
													atp5l.L
													lsm8.L
													ddx27.L
													hnrnph3.S
													erh.S
													psmb6.L
													sf1.S
													xnf7.S
													cox5b.1.L
													u2af2.S
													eif1b.S
													odc1.L
													skp1.S
													znf326.S
													xnf7.L
													btf3.L
													tnk2l.L
													taf13.S
													rrp8.L
													pno1.L
													tceb2.L
													btf3
													eif4a3.L
													serinc5.S
													anxa7.L
													kat6a.S
													nosip.S
													pithd1.L
													sugp2.L
													hnrnpul2.S
													LOC108701478
													thoc1.L
													imp4.S
													mxd3.S
													rbm22.S
													rack1.S
													pdcd5.L
													dkc1.L
													drap1.L
													alyref.S
													glul.S
													btf3l4.S
													ddx21.L
													snrpb.L
													sf3a3.L
													MGC81333
													phf13.S
													fbl.L
													sarnp.S
													snrpb.S
													eif2s2.L
													plrg1.S
													dnajc8.S
													cpsf3.L
													chmp2a.S
													pfdn5.S
													pabpc1.L
													rbm8a.S
													ehd1.L
													clta.L
													kiaa0907.L
													ddx39a.S
													fbxo9.S
													snrnp27.S
													lmnb1.L
													srp14
													utp11l.L
													snrpa1.S
													tra2b.L
													atp5g3.L
													tpm4.L
													clta.S
													pfn1.L
													supt5h.S
													rtfdc1.L
													prc1.2.S
													MGC80893
													cd9.S
													ssna1.L
													gtf2f1.L
													hnrnpc.L
													nop2.L
													prkra.L
													sumo2.S
													pcbp2.L
													inip.S
													srp72.S
													brk1.L
													hnrnpc.S
													eif2s3.L
													hmgb1
													glul.L
													ran.L
													arf4.S
													snrnp40.S
													azin1.S
													jup.L
													csnk2b.S
													cdc42.L
													ctnna1.S
													tma16.L
													alyref.L
													fubp1.S
													ppdpf.S
													ezh2.L
													sugt1.L
													snrpb2.L
													sf3a1.L
													gnl3l.S
													glrx3.L
													dnaja2.L
													hnrnpul2.L
													laptm4a.S
													ylpm1.L
													snrpc.S
													pspc1.L
													gadd45a.L
													dnaja2.S
													eif2s2.S
													mrps9.L
													ncbp2.L
													psma2.L
													b9d1.L
													fxr1.S
													ddx46.L
													gtf2f2.S
													nudc.L
													lmnb1.S
													rnf10.S
													sf3a3.S
													smc3.S

## Sheet: St10.5-11_Decrease
List of Genes for all Overlapping Temporal DESeq Groups, corresponding with supplemental figure 3
All_Lineages	Epi-Meso-Neur	Epi-Meso-Endo	Epi-Neur-Endo	Meso-Neur-Endo	Epi-Neur	Epi-Meso	Epi-Endo	Neur-Meso	Neur-Endo	Meso-Endo	Epi	Neur	Endo	Meso
fry.L	n/a	bdp1.S	vangl2.S	dnajc13.L	sox13.S	lrp1.L	itsn1.L	n/a	cnksr1.L	cask.L	mlxip.L	psme3.S	csrp2bp.L	ppfia1.L
patl2.L		ralb.L	kpnb1.L	sbf2.L	cracr2b.L	nfxl1.L	homez.L		trmt6.S	zswim1.S	scamp1.S		utrn.L	ints12.L
dhx35.S		igf2r.L	ankib1.S			pik3ca.S	per3.S		hic2.L	flna	gpt2.S		nol12.S	mfsd5.S
cited2.L		zfyve28-like.1.S	emsy.S			LOC108719517	pxn.L		txn2.S	ecsit.S	atrip.S		cdv3.L	uap1.S
tbp.L		bptf.L	ptges2.L			luzp1.S	pag1.L		gga1.L	snx17	jmjd1c.L		klf8.L	rce1.S
tmem131l.L		ubr5.L	mast2.S			gmnn.S	smarca5.S		eif4enif1.S	golim4.S	rnf13.S		yod1.L	znf182
otud4.S		LOC108706563	got2.L			LOC108704260	ccnyl1.S		blcap.S	ubr2.L	ubtd2.L		idh1.S	LOC108695585
		tcf19.L	ankrd13c.S			zic2.S	dpf2.L		rapgef1.S	pcyox1.L	mfap1.S		usp25.L	pcdh1.S
		plxnb2.L	znf335.L			rad51d.L	daam1.L		ccnb2.S	spty2d1.S	sox3.L		arfgef2-like.L	map4k4-like.L
		MGC115657	inf2.S			fam110c.S	fbxl19.L		habp4.S	mos.L	sp5l.L		znf585a	brd8.S
		plxnb2.S	anapc7.L			arhgap32.S	abhd16a.L		foxr1.L	pdcd6.L	lamp1.L		ppp4r3b.L	ctdsp1
		tnrc6b.L	aldh18a1.L			dnajb14.L	aaas.L		aldh2.L	LOC108719533	dnajc1.S		gna13.S	anapc13.1.L
		slc20a2.L	pou5f3.3.L			tmem110.L	arhgap35.S		parp15	znf684.S	neo1.L		snx5.S	MGC115291
		crtc3.S				zic1.L	dctpp1.L			spice1.L	acot11		dapk3.S	mex3a.L
		dcp1a				plpp5.L	abcd1.L			stub1.S	pold2.L		mettl16.L	optn.S
		prrg1.L				pgm2l1	yae1d1.L			pard3.L	taf9b.L		cct6a.S	gcnt3.S
		magi1.L				zic2.L	smagp.S			cdc20.L	tubgcp4.S		pdpr.S	gls.L
		kdm5c.S				foxh1.S	trappc8.L			tor1b.S	pprc1.L		nras.L	tmem230.L
		usp22 a				foxi2.L	slc39a9.L			tpcn1.L	l2hgdh.L		mybl2.S	pid1.L
		pex12.L				socs1.S	tgs1.L			coq10a.L	ipo8		dusp11.S	LOC108695561
		ptpra.S				hes7.1.L	akap17a.L			rhobtb2	tctn1.L		alg10.S	parpbp.S
		rassf3.S				socs3.L	cdt1.L			shf.L	prkcsh.S		mdm1.L	tmem39b.L
		zcchc11.S					gpr155.S			snx13.S	gpr155.L		taf5.L	loc100158433.L
		slc15a4.S					tbc1d12.L			efcab14.L	tdrp.S		map4k5	cry-dash.L
		MGC85180					evi5.S			picalm.1.S	LOC108701166		LOC108713105	zmynd19.L
		wdr37.L					tsc1.L			madd.S	taf1a.L		etv1.S	dgkq.L
		dgke.S					wdfy3			git2.L	ccdc120		hyal2.L	c2orf49.S
		herc1.L					atxn7l3.L			hells.S	tor1aip1-like.L		LOC108701074	snx7.L
		kmt2b					plin3.S			slc35c1.S	mllt1.L		znf239	dgkz
		spopl.S					afg3l2			abr.S	LOC108719529		sec24d.S	srgap2.S
		tprn					nsmaf.L			alg12.L	gpi.S		golga4.L	rab31.L
		pik3r2.S					appl2.L			pign.S	cbl.S		Xelaev18034023m	LOC108695555
		ccdc88a					cog3.L			smn2.S	tpbg.L		ppm1d	cntrl.L
		rapgef6.S					dcaf5.L			lin9.L	sox2.L		irf5.L	myo10.2.L
		cebpg.L					kidins220.L			tubg1.S	arl9.L		dck.1.L	dcaf10.S
		slc25a36.S					dcun1d3.S			cep120.L	LOC108710058		ddx56.L	znf367.S
		LOC108708787					usp32.S			dip2b	slc6a14.2.L		cask.S	dcp1a.S
		hells.L					lysmd4.L			shkbp1.L	ccpg1.S		rab14.S	ttbk2.S
		klhdc10					grinl1a.L			znf234.L	actr1a.S		spag1.S	slc15a4.L
		gab2.L					tubgcp5			siva1.L	oaf.S		cnnm2.L	mapkapk5.S
		ubtd2.S					ppip5k2.L			fastkd1.L	mtmr10.S		ppp3ca.L	map3k8.L
		xpo6.S					trim8			cog1.S	lrrc19.L		dock5.L	ctif.L
		tmem51.L					tbc1d22b.S			ccdc158	samd4a.S		actn4.S	bet1.S
		bfar.L					arhgef17.L			tctn2.L	adamts1.S		rad54l	ncor2.S
		capn15.L					tyro3.L			pid1.S	pigb.L		ythdf3.L	setd4.L
		usp34.L					sos2.L			fam20b.S	eea1.S		tulp4.L	grin2b.S
		mtmr10.L					ppp4r1l.S			fam53c.S	ins		myo9b.L	mis18a.L
		zfp661					mapkapk2.L			phkg2.L	smtn.L		nploc4.L	LOC108716296
		cbwd1.1.L					fbxo45.S			mark2.S	ide.S		pdpr.L	itga5.S
		wwp1.S					tnrc18.S			trpv4.L	tapt1.S		lman2.S	xrcc2.L
		aebp2.S					idh3a.S			poc5.L	irak1.L		eif4g1.S	mcf2l
		dapk1.L					stambp.S			jmjd4.L	LOC108695529		vps13a.L	MGC115585
		taf4b.S					usp44.S			slc9b2.S	dnajc1.L		cxcr4.L	cdadc1.S
		rnf19b.S					gemin2.S			prss16.L	fcho2.L		strn	sbk1.L
		kank1.L					tnrc6b.S			haus3.L	rictor		osbpl8.L	cttn.L
		arhgap35.L					ralgps2.L			asphd2.L	pip4k2b.S		brpf3.S	madd.L
		scap.L					brox.S			fez2.L	dennd4a.L		cpd.S	LOC108696623
		rnf217.L					akap13.S			tbc1d9	MGC115510		ppp4r3a.S	socs4.L
		ncoa7.L					wasf3.L			plekha5	etnk1.S		hmces.L	LOC108708488
		polg.L					pex1.L			lhfpl2.S	ppp1r13b.L		stag1.L	tigd5
		agap1.L					rab5d.S			picalm.1.L	LOC108704241		tm9sf1.S	nxpe3.S
		rassf2.L					tmtc3.L			gpkow.L	trpm7.S		ccnh.L	cebpb.S
		tank.L					hspbap1.L			tmem131.L	zfhx3.S		lca5.L	LOC108701404
		ate1.L					aes.L			mtss1.1.S	dars.L		naa15.L	fryl.L
		asap2.S					ttc9.L			fam189a1.S	fzd4.L		pkd2.L	gpr83
		rapgef1.L					arhgef7.S			LOC108714033	jmy.S		znf407.L	rnf112.1.S
		c14orf166.S					vldlr.S			kazn.L	LOC108699896		rnf121.L	mrps11.L
		pag1.S					pou2f1.L			znf704	rhof.L		ncald.L	sowahc.L
		rnf8.L					ankrd28			gatsl3.L	tmem140.L		slmap.S	Xelaev18047576m
		fam46b.S					tmem255a.S			pdzd2.S	LOC108704624		map7d1.S	LOC108714950
		arhgef12.L					rpa2.L			cfap97.L	gtpbp6.S		pds5b.S	mapkbp1.S
		chmp1a					lpgat1.S			stk35.S	fam177a1.L		prc1.S	meis3.L
		borcs6.S					znf618.S			ankrd52.S	cbwd1.1.S		rbm27.S	LOC108719547
		ets1.L					smg7.L			spire2.L	trappc8.S		bag4.S	nr1i2.S
		ralgapb.L					sorl1.L			rnf130.S	mkx.S		wdr26.S	pcgf2.L
		loc100493164.L					plekhg4.L			dbf4b.L	slc16a7.S		flii.S	LOC108719063
		ets1.S					cct6a.L			slmap.L	sos1.L		atg2b.L	tdgf1.1.L
		fam53a.S					usp38.L			heatr5a.L	surf1.L		pard6b.L	chst8.L
		bcar3.L					man2a2.L			rfwd2.S	il17rd.S		ykt6.L	nedd9.S
		klhdc10.L					styx.S			dus4l.L	lpar1.S		shroom4.L	Xelaev18039004m
		arhgap21.L					LOC108717147			usp34.S	chst13.S		atr.L	anapc10.S
		sec22a.L					lpgat1.L			lipe.L	snph.S		man2a1.S	pdgfrl.2.L
		cmtm7.S					fam134c.L			pias3.S	mlh1.S		cdc16.L	LOC108719562
		tgds.S					snx9.S			pik3r2.L	zbtb16.S		c5orf28.L	LOC108704294
		marchf2					wdr59.L			rilp.S	iffo1.L		rab23.S	gli1.S
		rnf19b.L					dag1.S			mylip.S	acod1.S		mast3.L	znf33a.L
		rif1.S					orai2.S			rad51c.L	acap3.L		gnl1.S	h2afj.S
		tmcc2.S					ube2j2.L			gtf2ird1.S	efna5.L		katnb1.S	LOC108697345
		znf577.S					xpo4.L			Xelaev18024710m	tubgcp3.L		pcnx1	lratd1
		fam102b.L					tmbim1.L			asphd2.S	rgs12.S		loc100158477.L	fosl1.L
		aktip.L					tank.S			papd5.S	lhx3.S		nsun7.S	Xelaev18038459m
		LOC108709196					atp8b1.L			atat1.S	socs1.L		mob1a	itgb8.L
		slc30a5.S					nde1.L			etv6.S	plcl2.S		traf7.S
		camsap1.L					pcmtd2.L			slc25a46.L	stc1.L		lasp1
		slc25a37.L					pxn.S			fam53a.L	mkl1.S		kif14.L
		pigc.S					gcc1.L			capn15.S	ackr3.S		arfgef1
		mid1.S					fbxl4.S			arv1.S	hes3.S		naa16-like.L
		ago1.L					edem3.L			mef2d.S	apold1.L		nudt4.S
		arhgap26.S					mfsd14a			arhgap11a.2.S	cd274.L		kif21a.L
		cdc6.S					inpp5b.L			zfp36l2.2.L	cish.S		ift122.L
		aak1.S					rel.S			loc100216027.L	cish.L		desi2.S
		dock9					abl2.L			loc733556.L	socs3		slc30a2.L
		pacs2.L					slc9a1.L			fryl.S	foxd4l1.1.L		pop1-like.L
		tmem170a.S					ism1.L			xpo6.L	admp.S		cdkn2aip.L
		prkch.L					eea1.L			arhgef11.S			atl2.L
		vps13d.L					slc30a6.S			dcaf12.L			cysrt1
		letm2.S					mios.L			mgll.L			pkn2.L
		tmem57.S					ssx2ip.L			ralgapa1.S			nradd.L
		dand5.L					ctif.S			ralgps1.S			fcho2.S
		Xelaev18030392m					maz			csgalnact1.L			pten.S
		prr14l.L					fam46b.L			nlk.L			sbf1.L
		dand5.S					agap1			mb21d2.L			usp54.L
		foxi2.S					mfsd11.S			loc100145507.S			katnb1.L
		kiaa0922.S					znf143.L			sgms1.L			mia3
							srgap2.L			LOC108718446			xylt2.L
							e2f4.L			mef2d.L			ccdc68.S
							slc39a10			foxj1.L			r3hcc1l.L
							atp2c1			LOC100490741.L			adam10.S
							slc9a6.L			kiaa0586.L			zmym4.L
							med13l.S			zdhhc7.S			gpn2.S
							nipa2.S			slc25a16.L			inpp5a.1.L
							atp13a4.S			Xelaev18011044m			rnf121.S
							slc20a1.S			LOC108719557			llgl1.S
							smc5.S			ern2.S			clasp1.S
							klhl7.S						dpy19l1.L
							rnf41.L						ptdss2.S
							clk2.S						nnt.S
							tbc1d30.L						Xelaev18028646m
							nedd4l.S						bod1l1
							ikbkg.L						zmym4.S
							ppp3cc.L						kcnab2.L
							ptcd2.L						trim39
							ptpn23.S						mospd2.S
							pik3ca.L						eri1.L
							LOC108703749						prkaa1.S
							cse1l.S						map7d2.S
							vcpip1.S						ppm1e.S
							pef1.S						pigs.L
							dop1a						fam91a1.L
							cep164.L						znf609.S
							fcho1.S						pard3.S
							ankrd13c.L						grk5.S
							ttc31.L						LOC100653495
							kat2b						ptpn12.L
							fam73a.L						itsn2.L
							arhgef11.L						usp53.L
							mid1.L						znf850
							svil.L						dr1.L
							fer.L						rraga.S
							mov10l1.L						trim3.L
							rnf219.L						stim2.S
							apitd1.L						tsc22d1.L
							cgnl1.S						whamm.L
							glce.S						tmem62.S
							tbc1d14.L						ivns1abp.L
							ndst2.L						tubgcp3.S
							tanc1-like.S						golph3l.L
							fam208b.S						ubn2.S
							tmem181.L						wdfy1
							Xelaev18033527m						mtx2.L
							plxna3.S						ube2k.L
							arhgef18.S						slitrk5.S
							disp1.L						ccna2.S
							kif13a						smc6.L
							abcb6.L						cul4b.S
							st3gal2.1.L						Xelaev18000337m
							golga1.L						rrm2.2.S
							ercc6l2.L						wapl.S
							cdc42se2-like.2.L						st3gal3.S
							rfc1.L						rragc.L
							rasal2.S						csnk1g3.L
							dip2a.S						clcn7.L
							frmd6.L						exosc6.L
							rnf149.L						cchcr1.L
							baz1a.S						ncln.S
							vps50.L						dars2.L
							mast4.S						dgcr8
							socs5.S						mycl.S
							exd1.L						ulk4.L
							prmt5.L						mpp6.L
							elmsan1.S						cdc14b.S
							fbxo42.L						golga2.S
							akap13.L						nacc1.L
							apcdd1.L						atp9a
							chmp1a.S						fam98a
							myo1e.1.L						sin3b.L
							bri3.S						hebp2.S
							def8.S						mcrip1.S
							keap1.L						rpn1.S
							sbf2.S						LOC108699095
							plcl2.L						phf3.L
							nfkbil1.L						lin9.S
							arhgef7.L						helz.S
							fbxl18.L						trpm7.L
							arhgap18.L						LOC108705533
							scai						ganab
							plin2.S						fam117b.S
							tpcn2.L						ppp2r5e.L
							bbs2.S						foxn2.S
							sipa1l3.L						cdan1.L
							c1galt1.S						gpatch2.L
							LOC108711716						herc3.L
							LOC108714686						iqce.L
							trim8.L						adarb1.L
							klhl13.L						rnpepl1.L
							srebf2.L						ctdnep1.L
							peak1.L						top1.2.S
							tspoap1.L						LOC108719524
							MGC85210						usp16.L
							ext1.L						rps6ka3.L
							stxbp6.L						nup133.L
							dgkh-like.S						r3hdm1.L
							pxylp1.S						sema3a.L
							Xelaev18003062m						kcnk5.S
							aak1						ncbp3
							wdr60.L						map4k4-like.S
							plxnb3.S						chaf1a.S
							limd2.S						inpp5f.L
							inf2.L						nde1.S
							dapk1.S						ndst1.S
							filip1.L						tuba4.L
							ccdc171						yes1.L
							helb.L						b3gnt2.L
							kcnj5.L						pdia6.L
							acox2.L						extl3.S
							styx.L						c15orf39.L
							ankrd54.L						socs6.L
							tmem57.L						tmem110.S
							ccnb1.L						ccnl1.L
							kctd9.L						lrch3.S
							tmem169.L						tlk1.L
							dnajc13.S						znf821.S
							MGC68639						tspan14.L
							palb2.L						fdx1l.L
							ccnb1.S						kdf1.L
							Xelaev18019693m						cenpi.L
							pou5f3.3.S						grip1.S
							pik3cb.L						ripor1.L
							hprt1.L						lemd3.S
							c1orf116.L						LOC108704248
							adh5.L						ywhag.L
							c11orf96.S						kdm3b.L
							LOC100127794.L						pawr.L
							LOC108695571						tnpo1.S
							LOC108717918						klhl15.L
							nlrx1.L						chd8.L
							bcl6.L						rabgef1.S
							b9d2.L						wfs1.S
							trim2.L						rimklb-like.S
							MGC83539						inpp4a.S
							mob3c.S						tle1.L
							akna.S						snx27.S
													eml4.L
													rptor.L
													uxs1.S
													rbfox2.S
													epas1.L
													itpr1.L
													dnmbp.S
													tbc1d4.L
													ptgfrn.S
													sept6.S
													usp37.L
													plxna1.S
													socs5.L
													kdm3a.S
													LOC108719552
													ninl.L
													slc12a6.S
													spsb1.S
													qrich1.1.L
													gpd2.L
													mapkapk2.S
													MGC84581
													znf516.S
													iqgap3.L
													zdhhc5.L
													trak2.L
													plpp1.L
													ambra1.S
													fam214a.L
													cdc42se2-like.1.S
													hyls1.S
													ppp1r12a.S
													ccnl1
													msl2.L
													c19orf44.L
													chst12.L
													stx2.L
													atg101.L
													sin3a.L
													p2rx4.L
													ext1.S
													phc3.L
													gpr157.L
													gabpb2.S
													slc35e1.L
													fbxo42.S
													vps54.L
													rabif.S
													zdhhc8.S
													neil3.L
													jade3.S
													Xelaev18041216m
													nos1ap
													sytl4.S
													sh3glb1.S
													kiaa1671
													keap1.S
													lin54.S
													adam9.S
													dbnl.S
													mbp.S
													samd4a.L
													src.L
													znf646.L
													ubr2.S
													ppfibp2
													wdr45.S
													adpgk.L
													snx30.L
													dvl3
													csnk1e.S
													dmtf1.L
													gapvd1.S
													map3k4.S
													lonrf2.L
													stk24.S
													MGC84007
													znf407.S
													sys1.S
													lcor.L
													rlf.L
													e2f7.L
													hmgxb4.S
													usp9x.L
													tmem5.S
													ckap2.S
													ctsd.S
													arl15.L
													ankle2.L
													siah1.L
													impad1.L
													pla2g6.L
													top1mt-like.L
													larp4.S
													picalm.S
													tom1l2.L
													ranbp2.L
													mbip.L
													kif1b.L
													znf335.S
													kif24.L
													haus6.S
													ncor1.L
													cttnbp2.L
													galnt2.S
													rnf115.S
													thada
													phka1
													LOC108704685
													helz.L
													dcun1d5.S
													rbsn.L
													hif1an.S
													dnajc14.S
													cdk8
													adnp.L
													traf4.S
													sos2.S
													ipo9.L
													rexo1.L
													araf.S
													nufip2.L
													gcc1.S
													usp38.S
													pja2.S
													ska2.L
													orc1.L
													tnpo1.L
													mia3-like.1.L
													ing3.L
													irf2bpl.L
													chfr.L
													gdf9.L
													zbtb33.S
													dhx30.S
													raf1.S
													zbtb47.L
													cenpn.L
													stxbp5.L
													foxm1.S
													strbp.L
													arhgef18
													arhgap32.L
													hmgxb3.L
													tada3.S
													n6amt1.L
													ippk.L
													ube3a.L
													zfp36l1.S
													mpst
													racgap1.S
													sdr42e1.L
													rab33b.S
													slc30a4.L
													gtpbp2.S
													usp3.L
													rab11fip5.L
													ccdc186
													lmtk2.L
													Xelaev18001896m
													atrn.S
													trim7.S
													hps4.L
													ier5l.L
													syvn1.L
													zbtb33.L
													nf1.S
													tbc1d30.S
													scyl2.S
													stard7.S
													nfkbie.L
													gpr137c.S
													syne2
													mgat1.L
													ndst1.L
													spty2d1.L
													fam20b.L
													rad54l2.L
													efna5.S
													armt1.L
													slc30a1.L
													emc8.S
													dclre1c.S
													pde6d.L
													dpp9.L
													bptf.S
													ubr3.L
													orai2.L
													spag9
													ppp3r1.L
													nemp1.L
													mpp5.L
													scarb1.L
													LOC108704268
													csrnp1.L
													plpp6.L
													mis18bp1a
													armc1.L
													ube2j2.S
													mier2.S
													plekhm1.S
													taok3.L
													mkln1.S
													pigb.S
													rhbdf2.L
													klhl21.L
													dapl1.S
													trim25
													atp8b4.S
													pard6b.S
													mum1.L
													tmed9.L
													klhl32.L
													ubr5.S
													ptpn4.L
													nelfa.L
													elavl2.S
													kiaa0196.S
													kctd6.L
													adarb1.S
													osbpl8.S
													xpo5.S
													jak2.L
													ubl7.L
													slc25a44.S
													tfdp2.L
													senp7.L
													brox.L
													gab2.S
													smad2.L
													twsg1.L
													dennd4b.L
													Xelaev18046477m
													otud3.L
													taf5l.S
													wnk1.L
													mtmr4.L
													ppp1r9a.S
													smad4.2.L
													shf.S
													znf423.L
													tjap1.S
													ung.L
													nus1.L
													hipk3.S
													lrrc58.S
													tmem115.L
													fam189a2.L
													csrnp2.S
													tcirg1.L
													n4bp1.L
													fam46c.S
													hnrnpll.S
													dqx1.L
													larp4.L
													mrpl1.L
													baiap2l1.S
													bnip2.S
													fermt2.S
													cass4.L
													slain2.S
													ryk.S
													tab3.S
													esco1.L
													ccdc149.S
													letmd1.L
													stambp.L
													foxo3.S
													atrn.L
													rab8b.L
													arid4b.L
													atp10d.L
													ppp1r12a.L
													kpna3.L
													ube3c.S
													tbc1d14
													gpsm2.S
													ptp4a3.S
													chd8.S
													hes7.2.L
													Xelaev18045296m
													gnpat.S
													etaa1.L
													klhl18.S
													gpsm2.L
													sap130.L
													tbc1d10a.L
													birc6.L
													slc9a7.S
													cic.L
													exoc2.L
													abhd11.L
													kdm3a.L
													znf782.S
													rfx7.L
													hspa5.S
													jmjd6.L
													men1.L
													senp1.L
													ano1.L
													cln6.L
													btbd3.S
													pnrc2.S
													ccdc149.L
													MGC81661
													traf7.L
													mau2.L
													vps53.S
													smad1.L
													tmem63a.S
													recql5.L
													elmod3.S
													snap47.L
													negr1.L
													tube1.L
													b3gnt4.L
													ttpal.S
													tbc1d23.L
													gbf1.L
													tmem189.L
													dnajc16.S
													adcy7.L
													rnf5.S
													apc.L
													sipa1l1.L
													akt1.S
													akap9.S
													slc44a4.L
													rpgr.S
													cbx2.L
													cep170b.L
													smarcad1.S
													paqr3.L
													chic2
													adam10
													sirt6.S
													rfx7
													kiaa0513.S
													atp8a1.L
													ddb2.L
													mast3
													pde7a.S
													tbc1d12.S
													derl2l.L
													med4.S
													thap1
													clec16a.L
													cep76.L
													aff1.L
													cep55-like.L
													sdc3
													sema3a.S
													MGC83673
													lrrc28.L
													tmem87b.L
													dcaf1.L
													snx33.S
													arhgap21.S
													daam1.S
													magi1.S
													zfp36l2.S
													gpi.L
													med18.S
													LOC108712660
													cog3.S
													tpcn2
													klhl22.L
													uba3.S
													elf1.L
													mfsd14b
													rabgef1.L
													dlg1
													znf577.L
													rock1.L
													tbc1d25.S
													creld1.L
													acsl4.S
													ganab.L
													ppara.S
													ptpn12.S
													mtfr1l.L
													phlpp1.S
													rcbtb1.S
													ranbp3.S
													oxsm.S
													sh2b1.S
													mphosph6.L
													dlg5.L
													ap5b1.L
													brat1.L
													LOC108707237
													LOC108712538
													fam126b
													h1foo.L
													kif1b.S
													slc39a10.L
													phlpp1.L
													rgs3.S
													c1galt1c1.S
													p2ry2.L
													grk6.S
													foxn2.L
													ado.L
													gs17.S
													leprotl1.S
													dcaf5.S
													xl64phr
													daglb.L
													has2.L
													mex3d.S
													twsg1.S
													ythdf3.S
													znf395.L
													zar1l.L
													hgsnat.L
													nfat5.L
													rhog-like.1.S
													zranb1.S
													gm29884
													aspm
													chd6.S
													csk.S
													spdl1.L
													rcor2.L
													stt3b.S
													rpa1.L
													abhd17a.L
													endod1.L
													stk11.L
													fam46c.L
													plxna3.L
													setbp1.S
													fbxl19.S
													stox2
													atxn1l.S
													tango6
													chpf.S
													rfwd2.L
													pdzd8.S
													ncoa4.L
													arid4b.S
													fam110c.L
													ankrd40.S
													lin28b.S
													secisbp2l.L
													lrif1
													usp46.S
													cc2d1b.S
													rdh9.L
													ttc37.L
													cers5.L
													zbtb5.S
													dnajc14.L
													tsc22d1
													Xelaev18030718m
													serinc2.L
													snai1.S
													atp10a
													smad7.S
													poldip2.S
													uck2
													efhd1.L
													clec16a.S
													zranb1.L
													kiaa0226l.S
													pcsk7.S
													fam49a.S
													wdr82.S
													zhx3.S
													aim1.L
													b4galt2.L
													ptdss1
													dennd5b.L
													oat.1.L
													stx19.L
													rhob.L
													smad6.S
													slc25a19.L
													dsc3.S
													ccny.L
													plekhm1.L
													rab11fip1.S
													birc6.S
													zbtb8b.L
													gtpbp1.S
													hectd4.L
													impad1.S
													borcs5.L
													ccdc126.S
													spryd3.L
													smarca5
													espl1.L
													fam83g.L
													cep192.L
													nkd1.S
													ppp1r9a.L
													dctn4.L
													rnf139.S
													hs2st1.S
													nckipsd.S
													wdr47.S
													ccser2.S
													araf.L
													cep170.S
													pik3c2a.S
													dvl3.L
													fam210a.S
													sgpp2.L
													tasp1.S
													ell.S
													pcdha13.L
													trim33.S
													golga3.S
													znf526.L
													bmp7.2.S
													grm8.L
													nckipsd.L
													suco.L
													fbxl15.L
													kbtbd3.S
													grb10.S
													oat.1.S
													amfr.S
													tmem51.S
													sesn2.S
													hdac4.L
													rab8b.S
													slc33a1.L
													taok3.S
													dip2c
													pank1.S
													slc9a7
													pigu
													ints14.S
													pqlc1.1.S
													hlcs.L
													ankib1.L
													dclre1b.L
													slc30a7.L
													mdh2.L
													ammecr1l.S
													lats1.S
													rapgef2.S
													spryd3.S
													sash1.S
													camsap3.L
													LOC108705257
													dpy19l4.S
													cenpn.S
													adnp2.L
													rassf3.L
													syne2.2.S
													thap7.S
													itpkc.L
													atg4a.L
													ptpn21.L
													znf845
													znf347.S
													tbc1d1.S
													spsb3.L
													atg14.L
													arrdc1.S
													LOC108709286
													golga2
													Xelaev18017221m
													LOC108714398
													bach2.S
													rab11fip2.S
													znf26
													pomgnt2.L
													itsn2
													furin.L
													sap30.L
													cpeb3.L
													fignl1.L
													ccdc66
													dapl1.L
													fkbp6.L
													uhrf1bp1l.L
													wdr81.L
													pigv.S
													igsf9.S
													zbtb41.L
													arf6.S
													pbx3.S
													LOC100489074.L
													bcl9l.S
													cgnl1.L
													ctdspl.L
													Xelaev18013924m
													oxct1.L
													ccdc28a.S
													ube3c.L
													ppp1r37.L
													cry2.S
													btbd2.S
													pard6g.S
													b4galt5
													trmt13.L
													akap10
													rab21.L
													brf2.L
													tanc2.L
													dtna.L
													r3hdm4.S
													atp8b4.L
													tjp3.S
													fgd4.S
													ern2.L
													mief1.L
													vsig10.L
													fitm2.L
													znf521
													plekhf2.L
													tmem178b
													filip1.S
													zhx2
													kiaa2026.S
													chd6.L
													ubap1.L
													usp6nl.L
													mfsd6l.S
													arhgef15.L
													arl5c.L
													cnp.L
													LOC108705473
													asxl3.S
													tanc2
													ubl3.S
													rgma.S
													rin3.S
													prickle4.S
													eif4enif1.L
													zar2.L
													afap1.L
													nploc4.S
													pdk4.S
													dolpp1.L
													rab27b.L
													ccdc9.L
													sec24b.L
													kiaa1191.L
													itpkc.S
													shroom2
													MGC83705
													smtnl2.S
													ncan
													tgfbrap1.L
													kiaa2026.L
													pacs1.L
													borcs7.S
													atf5.2.S
													ipmk.L
													mcl1.S
													pdik1l.L
													LOC108707139
													slc25a38
													zbtb47.S
													tpst2.S
													tdh.S
													tmem8a.L
													plk3.L
													cux1.S
													cnksr2.L
													cep85l
													shroom2.L
													nfatc3.S
													zdhhc12.L
													fam107b.S
													sh3rf1.S
													bcdin3d.L
													spin1.L
													cry1.L
													Xelaev18031388m
													cbx2.S
													zfhx4.L
													dock9.L
													snx18.S
													etv6.L
													lrch1.S
													c12orf66.L
													cbfa2t2.L
													adnp.S
													tnfaip1.L
													nfe2l3.S
													usp9x.S
													LOC108714146
													mycl.L
													fnip1.L
													epb41l4b.S
													kiaa0825.L
													slc35a5.L
													naa15.S
													abhd13.L
													lrp8.S
													bix1.3.S
													fmn2.L
													tollip.S
													lefty.L
													ccdc88a.S
													ccdc64.L
													rb1cc1.S
													pikfyve.L
													fem1b.L
													ncoa6.S
													stard13.S
													enpp4.L
													LOC108700013
													tbccd1.L
													cox5b.2.L
													scyl2.L
													ncoa3.S
													gatad2b
													tmem131.S
													cgn.S
													klhl20.S
													hps6.L
													sema4g.L
													cep170b.S
													skil.L
													erf.L
													fbxo10.L
													bcl2l12.L
													dab2ip
													ddx1.L
													lats2.S
													pacsin3.L
													tsen34.L
													c11orf95.L
													hpcal1.L
													socs6.S
													rps6ka6
													suox.L
													src.S
													rag2.S
													cdk5r2.L
													phlpp2.L
													tex2.2.S
													rbm38.L
													pigv-like.L
													mark4.L
													spg11.L
													lnx2.L
													kazn.S
													dlg3.S
													usp22.S
													clic1.S
													bnipl.L
													fam171a1.S
													trit1.L
													tmem104.L
													atp7a.L
													mark1.L
													gtf3c1.L
													smg8.S
													trafd1.L
													znf521.S
													vezt.L
													fam222b.L
													depdc7.S
													spdyc.L
													prkcz.L
													hes7.2.S
													fam63a.L
													pak4
													spire2.S
													ccdc64.S
													tmem158.L
													rasl10b.L
													LOC108718648
													rnf19a.L
													phf19.S
													hexdc.L
													akap9
													usp16.S
													LOC108707483
													slc39a13.S
													abhd17b.L
													zbtb24.L
													ikzf2.L
													gsap.L
													scarb2.S
													c12orf66.S
													f2rl1.S
													lhx5.L
													lnx2
													lzts3.L
													mtbp.S
													fbxo31.L
													eomes.S
													tbc1d8
													tiam1.S
													muc3a
													fer.S
													loc100491633.L
													ttbk2.L
													chfr.S
													atad3a.S
													pigg.S
													zbtb6.S
													csk.L
													b4galt5.L
													cmtm4.S
													sertad2.S
													nsd1.S
													Xelaev18016684m
													kbtbd8.S
													dph6.L
													bicc1.S
													atxn7l1.S
													glce.L
													alg11.L
													zfyve9.S
													ipo13.S
													krit1.L
													ripk1.L
													gid4.S
													gramd2b.S
													fdxacb1.L
													mbd4.L
													camkk1
													otud4.L
													rab7a.S
													garem1.S
													ccny
													rad17.L
													mfsd6.L
													nsd1.L
													vps37a.S
													MGC76328.S
													uspl1.S
													fyn.S
													plcg1.L
													prdm10.L
													usp8.L
													snx13.L
													rb1cc1.L
													MGC76328.L
													slc41a1
													mast2
													rita1.S
													atl3.L
													txndc9.L
													tert.L
													tns3.L
													arl10b.L
													trak1
													btbd9.S
													znf238.2.L
													batf3.S
													lrriq1.L
													atp8a1.S
													zfpm1.S
													LOC108699992
													tmem60.L
													wrap73.L
													kif22.L
													golph3l.S
													nuak2.S
													prkcz.S
													rmnd5a.L
													pms2.L
													Xelaev18026877m
													cdc25a.L
													Xelaev18021540m
													nfatc3.L
													c6orf120.L
													Xelaev18014049m
													rsbn1.L
													cep85l.L
													gfod1
													trappc4.S
													dolpp1
													nck1.L
													ccdc3.L
													cnppd1.S
													tmbim1.S
													slc35f5.L
													znf282.S
													nanp.L
													tor1a.S
													furin.S
													rpa2.S
													pwwp2b.L
													map4k5.S
													gga1.S
													map3k10.L
													mthfr.L
													helq.S
													arhgap26.L
													ippk.S
													mink1
													gse1.S
													slc8a3.L
													rasef.S
													klf4.L
													rab4b.L
													trim39.L
													pld2.L
													usp31.S
													appbp2.S
													cyld.L
													per2.L
													sowahb.S
													slc39a14.L
													ccdc117
													kdf1.S
													ccdc107
													acot12.L
													sntg1.L
													pcyox1l.L
													alg1.L
													kiaa0100.L
													LOC108710728
													lefty.S
													rin3.L
													nr2f1.L
													pip5kl1.S
													eomes.L
													nlk.S
													noct.S
													tdrd15.L
													f2rl1.L
													exoc8.S
													e2f4.S
													LOC108699305
													dguok.L
													mphosph9.L
													casp9.S
													emilin2.L
													grhl1.L
													bix2.L
													acaca-like.S
													znf462.L
													plag1.S
													phf3.S
													b3gnt5.L
													nr3c2.L
													LOC108705734
													grk3
													sh2b3.L
													clns1a.L
													lrrc16a.L
													srebf2.S
													habp4.L
													slc9a1.S
													josd1.L
													wnt5b.L
													ptpn3.S
													pisd.L
													rasl11b.L
													abhd13.S
													cacna2d1.S
													pwwp2b.S
													fgf8.L
													akap11.L
													vldlr.L
													ei24.S
													nck2.S
													fhdc1
													asap1
													sos1.S
													Xelaev18008577m
													larp6-like.1.L
													lrrc41.S
													selenon.S
													nek3.S
													mpp5.S
													spred3.S
													hpca.L
													otud7a.L
													zbtb14.L
													zfyve9.L
													adcyap1.S
													bambi.S
													dsel.L
													mgat2.S
													nadk.S
													LOC108719634
													kctd3.S
													tradd.L
													c15orf39.S
													atl2-like.S
													snai1.L
													rab33b.L
													sec24b.S
													wdr90.L
													cmip.L
													nptx2.S
													klhl23.L
													usp46.L
													Xelaev18010890m
													slc35a5.S
													mapre3.L
													wasll.L
													vps18.S
													pex11a.L
													saysd1.L
													prmt5.S
													blm.L
													styk1.S
													slc8b1.S
													gmfb
													eda.L
													socs1
													xzar2
													lrriq3.S
													pigc.L
													pik3cb.S
													otud7a.S
													mex3b.L
													MGC85058
													sox3.S
													bach1.S
													tmcc3.L
													gas2l1.S
													sema4d
													cry4.L
													ppp4r1l.L
													Xelaev18039594m
													lmo4.2.S
													tesk2.S
													spsb3.S
													ttll11.L
													clint1.L
													larp6-like.1.S
													pgam1.S
													tbp.S
													mtus1.L
													ccdc50
													Xelaev18041793m
													heg1.L
													dact3.S
													atp9b.L
													fry.S
													fkrp.L
													eif2ak3.S
													tcp1.S
													map7d3.L
													sh3bgrl.S
													bach2.L
													LOC495407
													wasll.S
													gata2.L
													ppp1cc.L
													gtpbp2.L
													ulk2
													nodal1.S
													usp8.S
													arhgef12.S
													mespb.S
													wdr6.L
													rhobtb1.L
													arv1.L
													zfp36l2.1.S
													camsap1
													rhof.S
													lrp12.S
													ago1.S
													LOC108705579
													plch2
													LOC108706177
													tmem171.L
													aco2.L
													slc35g1.L
													polr3g.L
													ddhd1.L
													Xelaev18023494m
													usp15.S
													dgkh
													egr1.L
													rnf180.S
													lpar5.S
													nedd9.L
													not.L
													cttnbp2nl.L
													sik2.S
													scn1b.S
													hip1r.S
													ptpn21.S
													gse1.L
													ulk2.L
													mex3d.L
													nr3c2.S
													srprb.L
													stmn1.S
													arhgap33.L
													wnt11b.L
													sirt3.2.L
													neu1.L
													mgat3.L
													tfap2c.S
													sel1l.S
													alg6
													znrf1.S
													arhgap11a.2.L
													dap.L
													Xelaev18004836m
													cse1l.L
													slc22a23.S
													brca2.L
													htr5a.L
													rgma.L
													emx1.2.L
													atxn1l.L
													pax3.L
													pias4.S
													lhx5.S
													bambi.L
													btbd3.L
													cct4.L
													atp10b
													tbc1d4.S
													etv3l.S
													zfpm1
													dll1.S
													rgcc.S
													fam8a1.L
													gcnt1.L
													zyg11b.S
													dock4.L
													prickle1.S
													ppp1r3b.S
													pdgfb.L
													rai1.L
													LOC108704627
													lhfp.S
													slc39a1l.L
													tnfrsf19.S
													bix1.3.L
													gpr160.L
													arhgap20.L
													tnrc6c.S
													pot1.L
													aktip.S
													fam219b.L
													ppargc1a.L
													camsap2
													vcpip1.L
													mfap3l.L
													ip6k1.L
													muc22
													cdkl5.L
													msantd3.L
													zc3h12b.L
													LOC100491090.L
													grip2.L
													sik2.L
													cracr2b.S
													cdca7
													tnrc6c.L
													slc25a43.L
													trerf1.S
													tpst2.L
													kctd9.S
													kcnq5.L
													tmtc2.S
													birc7.S
													neurl1b.L
													fam104a.S
													LOC108699965
													saxo2.L
													bach1.L
													Xelaev18032680m
													zyg11b.L
													zcchc14.S
													LOC108714685
													pdgfa.L
													r3hdm4.L
													znf484.L
													kctd15.L
													atf6b.L
													hoxc13.S
													ythdc2.L
													frmd4b.S
													hs3st1
													foxh1.L
													ralgps2.S
													rgs4.S
													cyld.S
													zbtb25.L
													ephb1.S
													rassf10.S
													egr1.S
													tbc1d2b.S
													rnf152.L
													fbxo30.L
													bix1.1.L
													dync1li2.S
													kctd3.L
													trerf1.L
													sstr2.L
													sun1.S
													tmem251-b
													stard13.L
													c11orf96.L
													rgmb.S
													bix1.2.L
													smad7.L
													lbh.S
													mespa.S
													akap10.L
													josd1.S
													sphk1.L
													not.S
													ifngr2.1.L
													ap4e1.S
													gpr22l.S
													irf2.S
													LOC108699131
													cdk5r2.S
													Xelaev18025328m
													mb21d2.S
													fgf8.S
													fgd6.S
													ccdc71l.L
													snrk.S
													Xelaev18038453m
													celf4.L
													ccnb5.L
													ccna1.L
													nectin1l2.2.S
													lurap1.S
													btg4.S
													aco2.S
													rspry1.L
													dnajb14.S
													tdgf1.3.L
													pak7.L
													fbxo43.S
													menf.1.L
													tnfrsf10b.L
													ston2.S
													btg4.L
													bri3.L
													ppargc1b.L
													LOC108709443
													slc35a1.L
													LOC108707354
													foxi4.2.S
													arhgap20
													nhs.L
													grhl1.S
													szl
													adamtsl1
													mespb.L
													fbxo33.L
													gpr75.L
													atp12a
													pgam1.L
													LOC108705749
													LOC108699405
													hs3st1.L
													fgf20.S
													mex3b.S
													LOC100491629.L
													sertad2.L
													mitd1.L
													wnt6.L
													LOC108708627
													znf81.L
													pxylp1.L
													areg.S
													klf2.S
													hlf.S
													fgf3.S
													tmem184a.S
													kank1.S
													nodal.L
													akip1
													foxe1.L
													atg9a.L
													dsel.S
													grhl3.L
													prkd3.L
													klb.S
													olfm1.S
													ccndx.S
													foxj1.S
													szl.L
													arhgap20.S
													grhl3.S
													kremen2.L
													Xelaev18003951m
													hes7.1.S
													foxh1.2.L

## Sheet: St11-12_Increase
List of Genes for all Overlapping Temporal DESeq Groups, corresponding with supplemental figure 3
All_Lineages	Epi-Meso-Neur	Epi-Meso-Endo	Epi-Neur-Endo	Meso-Neur-Endo	Epi-Neur	Epi-Meso	Epi-Endo	Neur-Meso	Neur-Endo	Meso-Endo	Epi	Neur	Endo	Meso
flrt2.L	otog.L	myb.L	gata3.S	krt.L	comt.L	znf534.L	niban2	fucolectin.S	crabp2.S	sfrp1.L	hes8.S	mmp1.S	ripply2.S	LOC100145533.L
capn8.S	fcgbp	tril.L	dab2ip-like.L	ccdc129.L	tesc.L	hes8.L	atp13a-like.S	LOC108718065	ventx2.1.L	msgn1.S	hes5.3.S	slc32a1.S	LOC108700980	cmahp.L
post7p.L	slc45a3.S	slc45a3.L	ppp1r18	vwf.L	col18a1.L	itln1.L	isl1.L	adgrf1.L	ventx2.2.L	hoxd1.S	dmrt2.S	gabra1.L	sstr2	slc35a3.1.L
post10.L	syt8.L	rab15.L	syne3.L	angpt4.S	errfi1.L	ppl.S	tbx20.L	eps8l1.L	stx3.L	hkdc1.S	foxj1.2.L	rgs2.L	p2ry4.L	LOC108719743
post.L	znf185.L	slc26a4l.L	slfn13.L	crabp2.L	gata2.S	mcidas	eya1.L	ttc22.L	ccn2	lamb1.L	foxj1.2.S	mmp19.L	klb.L	ly6e
gata2.L	rab27a.S	rab3d.L	mdk.S	a2m.S	hes3.1.L	prox1.S	slc1a1.L	tnfrsf11a.S	fkbp9.L	crb2.S	kit.S	Xelaev18021497m	Xelaev18003553m	glb1l2.S
msi1.S	LOC398451	capn8.2.L	rab11fip3.L	prom1.L	creb3l2.L	hes3.3.L	tbx2.L	degs3.L	LOC108708063	slc3a1.S	klf4.S	muc1.L	celf3.S	LOC108719498
sh3d21.L	mboat1.L	Xelaev18039917m	lmo4.2.S	cfh.L	scnn1a.S	galnt12.L	LOC108719358	loc108648340.L	fam102a.L	cntn1.S	Xelaev18002015m	plekha2.S	LOC108715566	Xelaev18029603m
prpsap1.S	ptk2b.S	clcnkb	atp1a1.L	znf608.S	fam174b.L	atp12a.L	sox5	fam83c.L	pax3.S	liph.L	anos1.L	meis1.L	opn5.2.L	tp63.S
ahnak.L	gcm1.L	sp5.L	plch1	cdc42se2-like.1.L	vwa5a.L	loc100145533.S	tll1.S	MGC83169	fam198a.L	axin2.S	loc100489456.L	LOC108704572	tmprss2.1.L	slc16a9.S
notch2.L	MGC80993	cdc42bpa.L	wwtr1.S	trpv5.L	sspo.L	fam3d.S	ahnak.S	krt5.7.S	igfbp2	iqca1.L	gata6.S	znfx1.L	tmprss2.1.S	ugt8.S
	elf1.S	pvrl1-like.2.S	bahcc1.S	rab34.L	sec14l1.L	vill.S	tbx2.S	pvrl4.S	hpgd.S	lmln	tbx3.L	otx2.L	gjb1.L	gck.L
	stard10.S	tll1-like.1.L	nav2.L	nr2f6.L	fam222a.L	dipk1c.S	cdh2.S	LOC108699553	mrc2.S	b3gnt3.L	bmp7.1.S	abca4.L	kifc3	mesp2.S
	rbbp8nl.L	lmo4.1.S	zmiz2.S	nxpe4		gdpd1.L	kcnc1	elovl3.L	id3.S	nxpe2.L	hspg2.L	carmil3	LOC100037118	Xelaev18032572m
	b3gnt7.L	hes5.1.L	proser1.L	anln.L		Xelaev18045499m	lmo4.1.L	LOC108715896	id3.L	pou4f1.2.L	slc38a2.L	LOC108711024	b3galt1.L	hoxd1.L
	pmm2.L	golm1.L	phldb1.S	greb1l		mcidas.L	xfrp	gnb3.L	crb2.L	robo2	tbx3.S	otx2.S	znf469.L	syt1
	fer1l4	comt.2.S	acvr1.L	gen1		vill.L	LOC108714578	atp6ap1.1.S	zfp36l1.L	LOC108698034	ankrd22.S	rnf223.L	tmem72.L	frem1.L
	LOC100486385.S	LOC108704696		rhebl1.L		LOC100486385.L	vwf	evpl.L	cnrip1.L	LOC108708140	foxn4.S	baiap2	endoul2.L	pnliprp1
	aacs.L	krt5.7.L		net1.S		tuba1a.S	dgkk.L	gng7.L	pax3.L	Xelaev18012290m	krt16.L	fn3k.L	LOC100135146.S	tbx6.S
	scnn1a.L	lrp4.S		slc2a2.L		aim1.S	blvra.L	Xelaev18043700m	clcn2.L	ttn	dmrta2.S	hk1.L	wnt8b.S	LOC108705880
	tm9sf3.L	slc44a3.L		gigyf2.L		vgll1.L	tcp11l2.L	trpm4	uts2r	gli3.S	foxj1.S	itga6.L	Xelaev18044644m	LOC100497061.L
	stard10.L	emp2.L				tnni2.L	znf644.L	slc7a4.L	ptprb.L	fzd10.L	nefm.L	slc43a2.S	dhh.L	hoxa11.S
	clcn5.L	trim29.L				parm1	anxa2.S	gprc5cl1.L	cblb.L	Xelaev18029191m	gadd45b.L	elavl3	trpm6.L	lrat.L
	cltc.L	gpatch8.L				ag1.S	klf6.L	sulf1.L	arhgap36.L	abcb5	arid3a	ptprz1.L	LOC108706987	hes9.1.S
		Xelaev18005230m				spns1	kiaa1549.S	chsy1.L	tmem138.L	hes5_X2.L	prrt3-like.L	mms19	Xelaev18003555m	krt12.L
		dgkd-like.L				slc9a3r2.L	tead4.S	znf581.S	slc6a13.L	fam13b.L	LOC108710463	scn2a	fgfrl1.S	p2rx1.L
		fzd10.S				slc17a9.S	gata3.L	chrna2.S	mmp14.L	nceh1.L	hes9-1.S	c14orf37.L	ripply2.1.S	hes5.2.L
		actn1.L				rasal1.L	Xelaev18037856m	zfand5.S	dnmbp.L	hes6.1.L	znf827.L	foxb1.S	ripply2.L	cdx2.S
		eif4g1.L				vtcn1.L	zmynd8.L	actb.L	kiaa1614.L	plod2.L	myb.S	foxd4l1.1.S	Xelaev18011560m	hoxa1.L
		sytl2				xk81a1.L	wdr12.S	cdh1.S	sema4a.S	slc30a8.L	pdgfa.S	tnfrsf6b.L	sp5.S	atp13a-like.L
		chd2.L				gby.L	ghitm.S		arl8a.S	LOC101731753.L	pcdh8.2.L	foxd4l1.L	nrl.S	socs3.L
		LOC108704672				fzd6.L	fam83h.S		Xelaev18032100m	xarp.L	Xelaev18000619m	shroom3.L	LOC108709100	loc100496187.L
		rbm47.L				bmper.L	itpr2		clca3.L	LOC108704134	dtx1.L	stard13.S	slc7a5.L	kif26a.S
		smug1.L				slc3a2	fblim1.S		arhgef3.2.L	casd1.L	s100a2	kmo.L	gbx2.2.S	hes9-1.L
		cxcl12.L				sidt1.L	esyt2.S		zfp36l1.S	scel.L	ecm1.S	scarb1.S	flt1.L	prr18.S
		dgka.L				b4galnt3.S	proser1.S		notum.S	myo5c.L	c1orf127.L	fhl3.L	lypd6.S	hes5.5.L
		prpf39				hspa13.L	hao2.L		ccdc68.L	abcc4	LOC108699294	kcnj15.L	LOC108712697	hoxa9.L
		tmem52.L				onecut1.2.S	gata5.S		gpd1.L	fut3.L	Xelaev18037313m	chrna2.L	col13a1	tcaf1.L
		rspo2.L				gnb3.S	cebpa.L		sema6a.S	dspp	hsd3b1.L	thbs1.L	igf2.L	LOC108711745
		slc29a3.L				lgalsl.L	khdc4		dennd2a.L	LOC108714284	cfap161.L	lrp2.L	cga.L	socs1.L
		vangl1.L				hes5.1.S	acsl1.S		cfp.L	pde4d	hs6st1.S	adam33.L	ankrd10	f2rl2.L
		gfpt1.L				syt16.L	krt8.L		znf608	p2ry11.L	esr10.S	spin1.S	frzb2.S	sult6b1.5.L
		adam9				ttc39a.L	gpatch8.S		b4galt3.L	sytl1.S	abtb2.L	LOC100496797.L	mamld1.L	fut6.S
		post5.S				rab25.L	LOC108713946		LOC108698716	slc12a3.2.S	Xelaev18035430m	tuft1.L	vav3.L	xk81a1.S
		LOC108695829				slc30a10.S	spred2.L		apeh.L	hmcn2	LOC108714664	ptger2.L	Xetrov90028420m.S	aatk
		mn1.S				rarres1.L	farp2.L		ccng1.L	mgst1.L	Xelaev18003738m	mras.L	axin2	gng13.S
		dedd2.L				nbeal2.L	Xelaev18038622m		tmem79.L	aox2	gfra1	wnt7a	myo10.S	Xelaev18036730m
		chpf.L				krt23.L	kdm5b.S		lin28a.L	sp7.S	foxj1.L	fam83f.S	foxp4.S	nr6a1.L
		aim1l.L				rgl1	kdm6a.S		rbms2.S	c8g.S	lsp1.L	glis2.S	hnf1b.S	krt12.S
		birc2.S				tbc1d31.L	traf3ip1.L		ccng1.S	LOC108719420	bmerb1	ttyh2.S	fut4.L	acpp
		cdk1.L				ppl.L	top2b.S		ncoa2.L	nedd9.L	fzd6.S	myt1.S	LOC108713029	plekhg5.L
		tuba3c.S				syt13	slc16a6.L		ptch2.L	notch2.S	mab21l3.S	zic5.L	chst5.S	LOC108701787
		top2b.L				wdr66.L	ubap2.L		fam174b.S	rnd3.S	pou2f3.L	nxpe4.S	LOC108706900	cdx1.L
		arpc3.L				fam195a.L	fam53c.L		mn1.L	slc18a1	loc100216141.L	mapk8ip2.L	Xelaev18004377m	LOC108701744
		p4hb.L				rsph1.L	ticrr.L		alpl.L	rps6ka4.L	znf827.S	col4a5.S	Xelaev18046953m	adck1.L
		lsm4.L				Xelaev18017809m	xicl		lrp10.S	palm.S	rergl	LOC100496293.L	nts.L	gcnt4
		polr2h.L				esrrg.S	eif4a2.L		rreb1.L	golm1.S	LOC108711831	gli3.L	prdm12.L	fam177b.L
		ell.L				gne.S	ahdc1.L		cyp1a1.L	sema6a.L	myo1e	raig3	ncr3	dync1i1
		mllt10.L				degs3.S	rbm45.L		tmem238	slc1a7	plekha7.L	drc7	slc38a8.L	cdx4.L
		march7.S				dedd2.S	pan2.L		lsp1.S	fzd4	Xelaev18030689m	adh5.S	Xelaev18003864m	ahnak
		c12orf45.S				efnb3	ptmap12.S		cables2.L	meis3.L	gata4.S	frmd4a.L	LOC108704705	phka2-like.S
		gfpt1.S				b4galnt3.L	r3hdm2.L		trim71.S	ag1.L	rorb.L	wfdc2.L	LOC108697952	greb1.L
		topbp1.L				nr6a1.S	cerk		gltscr1.S	nlrc4.L	Xelaev18032309m	amotl2.S	LOC108717763	agr2.S
		dynll1.L				sgsm3.S	skida1.L		zmynd8.S	epn3.L	LOC108700979	Xelaev18002025m	gdap1l1.L	Xelaev18012620m
		stim1.S				zbtb46.S	kiaa0907.L		guca1a.S	tgfbr1	cul5.S	rin2.L	tet2.S	col16a1
		lsm4.S				gdpgp1.S	pou5f3.1.L		znf219.L	LOC108716735	fbxo16.L	fcho1.L	Xelaev18001208m	LOC108719446
		krt8.S				specc1l	shb.L		kdm2b.L	prkx.L	lrrc36.L	kalrn.L	pros1.S	irf5.S
		yipf6.L				vsig8.L	atp1a1.S		alcam.L	LOC108717899	esrra.L	map3k1.S	Xelaev18006811m	itpr3
		rpl35a.L				samd15.L	Xelaev18006569m		plec.S	tmem45a.L	bcat1.L	arhgef16.S	myo3b.L	kxd1.S
		phip.L				slc22a4.L	LOC108711813		aplp2.L	Xelaev18003060m	tbc1d24.2.S	robo3.S	gata5.L	rbm20.L
		myc.S				bmp7.1.L	itga5.L		gpr143.L	LOC108704327	lef1.L	zic2.S	a2ml1.L	LOC100037903.1
		ube2n.S				LOC108709394	rbm14.L		znf750.L	msx1.L	LOC108701745	zic2.L	chrnb2.S	slc2a12.L
		arglu1.S				c6orf132	dph7.L		cyp27a1	LOC108709519	rab6b.L	fndc3a.S	calb1.L	trpm7
		rpl26.S				slc9a3r2.S	tmem52.S		setd1b.L	msx2.L	crocc2	sp8.S	plcb4.L	ociad2.S
		prelid1.S				slc35c1.L	kif11.S		kifc3.L	slc35d1.L	pmepa1.S	cbfa2t2.L	hcrtr2.L	dnah7.L
		id4.S				nek2.L	spsb4.L		sgk223.L	cbx1.L	ablim1.S	scube2.S	pitx1.L	lrpprc.S
		march6.L				kit.L	c1orf198		Xelaev18022168m	rai14.L	cdc42bpa.S	akap12.S	ube2g2.S	LOC108704529
		nek2.S				ccdc63.S	LOC108711131			trpv6.L	efhc1.L	cdh26.S	robo4.S	ncam1.L
		rps12.L				lgalsl.S	bcorl1.L			myc.L	atp6v0a4.L	rreb1.S	fam46d.S	Xelaev18000386m
		Xelaev18000128m				ddx54	LOC108715172			Xelaev18012280m	ephb2.S	prdm1.L	lama1.L	LOC108705922
		aurka.L				dlx3.L	fam107a.S			ndufa8.S	hspa5	LOC108701422	Xelaev18022564m	xmc.L
		rpl26.L				chsy1.S	sptan1.L			xarp-like.S	xk.L	plekhs1	ror1.L	fa2h.L
		smc2.S				pprc1	parp1.L			znf740.L	capns1.L	trim25.L	mia.L	hdac11
		leng8.L				sytl4.S	paxip1.S			nr1i3.S	dlx2.L	LOC108716397	mmel1.L	glipr2.S
		rps3a.L				MGC81163	lmo4.2.L			stk40.L	arhgap23.L	dennd2c.S	Xelaev18003342m	b4galt1
		melk.L				slc17a9.L	pik3r1.L			cpt1a.L	dnajb9.L	ankrd24.L	slc3a1.L	pde9a.L
		brd1.S				rbbp8nl.S	rbm12.L			loc108718659.S	ubald2.L	tgif1.L	eps8l3.S	nr1d2.L
		anln-like.1.L				LOC108710484	tiprl.S			lcmt2.L	lzts2.S	tpbg.L	bsnd.L	Xelaev18003636m
		cfap77				esrp1.L	enc1.2.L			Xelaev18022166m	pmepa1.L	mxi1.L	ldlrad4.L	gm39120
		kiaa0232.L				esrp1.S	fnbp1l			pim1.S	LOC108697430	notch1.L	pzp-like.2.L	anxa9.L
		rpl27a.L				armc4.S	ncoa6.L			cenpe.L	Xelaev18043506m	zfhx3.L	pou4f1.2.S	krt18.3.S
		lrig2.L				mfsd6l.L	ttf2.S			ankrd11.L	fzd3.L	trim45.L	LOC108706988	tmem56.2.L
		rps6.L				MGC98819	znf462.S			plcb4.S	rnf208.L	atp6a1	ptk6.L	evx1.L
		Xetrov90014299m.L				ptger4.S	fam64a.L			rictor.S	lrmp.L	hoxc12.S	slc2a2.S	trabd.S
		cdc34.S				rnf43.L	rbl1.L			ube2n.L	rassf10.L	fgd1.S	kif21b	kctd15.S
		rpl34.S				Xelaev18038969m	sfpq.L			cdca2-like.L	eya1.S	lrig1.L	ece2.L	bpgm.L
		LOC108706721				arf6.L	cxadr.L			srrd.L	pkp3.S	dyrk3.L	Xelaev18007877m	p2ry11.S
		znf740.S				gopc.L	esco2.S			zbtb39.L	ctbs.S	rasgef1b.L	serpind1.L	post9p.L
		dynll1.S				ubp1.L	hnrnpl.L			zzz3.S	atg16l2	fnip2.L	faah.3.S	sh3rf2.S
		loc728026.L				c1galt1c1.L	fam193a.S			rictor	ccno.L	hdac7.L	foxe1.L	krt18
		hdlbp.L				slc30a7.S	ubap2l.L			cbx1.S	asl.L	arhgap39	vav1	cdx1.S
		tdg.S				sgpp1.L	capzb.L			ankrd11.S	galnt10.L	tmem265.L	Xelaev18005504m	cxcl12.S
		Xelaev18027269m				enc1.L	itga3.S			ago4.L	trib1.L	tuba1cl.2.S	adamts18.L	ovol1.L
		rps2.L				dusp8.S	lamc1.S			rnf38.S	ccdc151.L	LOC108697464	ncmap.S	gk.L
		kmt2e.L				endod1.L	rps10			rpl17.L	sept5.L	cnfn.1.L	msgn1.L	rpe65.S
		arhgap5.L				slc4a1.S	ncapd2.S			pim1.L	tead4.L	aqp4	meis3.S	btc.S
		rpl7.L				LOC108713117	cramp1.S			uqcr10	LOC108708333	Xelaev18001646m	nrn1.L	znf185.S
		rps3a.S				elmod2.L	srrt.L			smc2.L	pnck.S	ip6k2.L	egflam.S	LOC108715628
		MGC81028				slc22a5.L	peli1.L			zfand4.L	foxn4.L	fzd8.L	hnf1b.L	creb3l4.L
		leprotl1.L				poc1a.L	mcrs1.S			rps9.L	cyp2ac1	prdm14.S	Xelaev18005962m	rock1
		rpl37.S				derl1	rbm4b.S			hnrnpr.L	prickle2.S	LOC494849	mmrn2.S	tmem56.L
		Xelaev18012294m				MGC68858	tubb2b.L			lig3.L	chpf.S	znf710.L	slc4a10.S	znf532.L
		rps6.S				tm9sf2.L	rbm4b.L			Xelaev18012451m	adgrl2.S	zic3.L	b3galt5	kiaa1217.S
		arrdc3.L				pdxdc1.L	snrnp200.S			rbm34.L	amotl1.L	plekhg1.L	prrx1.L	LOC108717439
		slu7.L				zbtb46.L	paxip1.L			wdr83os.L	znrf3.L	ablim1	Xelaev18003609m	LOC108715762
		rbm45.S				tiam1.S	psmc5.L			wsb1.L	inpp5a.2.L	scube2.L	sv2b-like.S	aldh1l1.L
		rpl31.L				fam3b.L	LOC397846			ndufa8.L	myo5b.S	c3.L	ventx1.1.S	arhgap6
		rps4				mtus1.L	rps20.L			nxpe3l.6.L	socs2.S	prdm14.L	LOC108700650	LOC108701743
		MGC83421				alg2.L	rpl38.S			elof1.L	shroom4.L	egln3.L	slc28a3.L	atp8b3.L
		rpl8.S				ccser2.L	sf3b2.S			ptma.L	kif5c	ranbp3l.L	nuak1.L	gramd2b
		prc1.2.S				klf5.L	srsf4.L			ywhae.L	LOC108699634	arap1	aldh1a3.L	LOC108701721
		rpl6.L				c5orf15.S				wdr12.L	LOC108702079	jmjd1c.L	il6r.S	loc548390.S
		rpl10a.S				mfsd2a.S				hpgd.L	efnb2.L	jmjd1c.S	dbx2.L	tnni1.2.L
		rps27a.L				stard4.L				itpka	LOC108718667	arg2.S	arhgap4.S	ankrd12.S
						mapk6.S				akap2.L	dzank1.L	setd2.L	gngt2.1.S	ncam1.S
						selk.S				fzd2.S	prodh2.L	lefty.L	Xelaev18029198m	Xelaev18000483m
						trpm5.L				kmt5b.S	hspa5.S	sds.L	vat1l.L	fcn2
						LOC108709654				szl.L	hes1.S	zfand5.L	adamts5.L	Xelaev18039754m
						bicd1				pbx2.S	pias2.L	slc4a7.L	dlk2.S	adgrf5
						dnajb12.L				rbfox2.S	irs2.L	map3k1.L	tecta.1.L	cdc14a.L
						ccser2.S				litaf.S	ip6k2.S	upk2.S	twist1.L	nek5.L
						uspl1-like.L				kif11.L	styk1.S	lin28a.S	rtn4rl1.L	LOC108711335
						tm9sf3.S				tjp2	bcor.L	rhpn2.L	plppr4.S	mov10
						arglu1.L				yif1b.L	dlx3.S	sfrp2.L	lfng.L	myo5b.L
						dot1l.L				cirbp.S	pygm.L	g0s2.L	fam179a.S	dnajb9.S
						LOC108701168				nsep1	aspg.L	cass4.L	hgf.S	LOC100492708
						ift46.L				fau.L	ccno.S	cdc42bpb.L	LOC100491930.L	LOC108699767
						h1fx.S				cdk1.S	slc7a8.L	lrig3.S	ventx1.1.L	sp7.L
						gmps.L				mapre1.S	tmem213.L	neurl1b.L	egflam.L	LOC108718861
						tfcp2l1.S				rpl23.S	prr12.S	smtn.S	chp1.S	spdef.S
						itpkb				ubtd1.S	vash2.S	usp54.L	fut6	kctd15.L
						gmppb.L				cdca3.L	plxnb1.L	myo9a	arhgef38.S	atf7ip.S
						ssr2.L				ythdf2.L	phf21b	acvr1.S	col3a1.S	slc19a2.L
						LOC108699910				clasrp.L	dhcr7.L	cdc25b.L	Xelaev18044674m	hic2.L
						slc35a2.L				mypop.S	LOC108713945	gpr4	heca.L	figf.L
						sec61a1.S				rhoa.2.S	bcr.L	gne.L	tspan5.L	gas1.L
						ano9.L				lrp5.L	kdm7a.S	trim71	ebf3.L	sephs1.S
						loc734020.L				tlr2	efs.L	LOC108717895	msx1.S	hexd
						nckap5l.S				cdca5.L	lrrn1.L	akap12.L	apela.S	LOC108704556
						hsf2.L				rps5.S	unc5b	cfap52.L	Xelaev18012292m	mfhas1
						tstd1.S				rpl30.L	mid1ip1.S	fgd4.L	fam83b.L	trim29.S
						herpud1.S				ybx1.S	klf13.S	znf750.S	sh2b2.S	blvrb.L
						utp15.L				rps16.L	dtx4.L	sds.S	darmin.L	znf414.L
						loc100497729.L				zfc3h1	ttll1.S	ncoa2.S	pde9a	prdx4.L
						gmeb2.L				scamp5.L	srcap.L	lamc1.L	scn5a	rasgrp1.L
						cry1				ywhae.S	tmem39a.S	prc1.L	rgma.L	1700007k13rik
						kndc1.L				rps7	pdgfra.L	acod1	otop3.L	ndc1.L
						uqcrq.S				uqcr11	pik3r1.S	cabin1.L	meis2.S	ptger4.L
						leng8.S				kiaa0355.L	sik3.L	fam13a.L	bsnd.S	LOC108711752
						kitlg.L				hmg-17	ndufb6.L	spg21.S	loc548390.L	fam83c.S
						srp19.S				hnrnph3.L	Xelaev18025569m	plekhn1.L	crhr1.2.L	muc17
						myl6.S				cidea.L	nrbp2.L	prdm1.S	grhl2.L	c18orf21.L
						nr2f6				rps19.S	tmem39a.L	midn.L	nostrin.L	zbtb11.L
						rpl8.L				cirbp.L	rybp.L		frzb2.L	MGC85058
						cep135.L				hmgn1.L	Xelaev18033745m		vwde.L	slain2.L
						clk3.S				eef1a1.L	tead1.S		mid1.L	clic3.L
						snx12.L				rpl9.L	slc9a2		foxi4.2.L	cib1.S
						rpf1.S				hnrnpdl.L	tmed9.L		scel	wap
						trappc13.S				rps10.L	fchsd2		dscaml1.L	krt8.2.S
						mars2				sem1	lrrn1.S		meox2.S	tprg1l
						eif4e.L				cdc34.L	irf2bpl.S		Xetrov90020447m.S	mbd6.S
						cln3.L				hmgn2.L	gdi1.S		iqsec3.L	tusc2.S
						shfm1.S				myef2.L	prelid3b.S		chst3.L	tceb3.L
						hps3.L				MGC52578	creb3l4.S		b3gnt4.S	pprc1.L
						rpl27a.S				arf1.S	npnt.S		ntn3.L	upk3b.L
						chkb.S				tpt1.L	Xelaev18006613m		cfd.L	LOC108711517
						capn1.L				hnrnpa2b1.S	Xelaev18007569m		nos1.L	vimp.S
						mau2.S				snrpf.L	Xelaev18011667m		emid1.L	igf1r.L
						ranbp2.S				gpcpd1.L	Xelaev18040914m		pde1b.L	fam3c.S
						rpl19.L				rpl15.L	ubap2.S		LOC108713036	klhl36.L
						rpl17-c18orf32				no38	stambp.L		dhh.S	slc35c2.S
						anxa4.L				arl1.L	grhl1.L		gap43.L	zfand4.S
						dgkd-like.S				hmgb2.S	LOC108715921		itga2.L	deaf1.L
						psmb3.L				rps20.S	b4galt3l2.L		Xelaev18039313m	ywhah.S
						cops5.S					vasn.S		fzd4.L	galnt6
						luc7l2.S					MGC52827		rasgef1b.S	LOC108713175
						snrnp200.L					rdh10.L		bhlhe41	rps21
						tomm70a.S					rnf44.S		tet2.L	afmid.L
						xab2.L					iqsec3.S		LOC108701268	tab2.S
						mrpl27.L					scaf4.L		sncg.S	tnip2.L
						znf593.L					cfap100.L		frmd3.S	tmem45b.L
						ssr1.S					srcap.S		vgll4l.L	fhit.L
						rpl4.S					kpna4.S		ripk2.S	gpatch4.S
						atp5o.L					syn2.S		fgfr3.L	map2k6.L
						zfp36l1					slc25a25.L		foxf1.L	LOC108710853
						rps13.L					emg1.L		nrcam.L	map3k10.L
						rps3.S					intu.S		gjb2.L	ccdc71.S
						prpf39.1.S					ptbp1.S		LOC108715837	twsg1.S
						hspa8.L					abca8.L		a2m	tiparp.S
						mtf2.S					LOC108712218		LOC108707266	MGC52622
						jagn1.L					tprn.L		sp9.L	dlx6.S
						rpl32					vangl1.S		Xelaev18012289m	hivep1.L
						rpl37a.L					flvcr1.S		fbxo32	esyt3.S
						LOC108708564					ccdc112.L		cfap54	LOC108719789
						rpl7a.S					crebzf.S		LOC108701132	zfp91.L
						rps23.L					stk38l.L		siglec1.L	fam212a.S
						ctps1.S					hap1.L		pnpla2	c14orf79.L
						LOC108709832					sephs1.L		LOC108717136	mfsd6.L
						rps9					gss.L		Xelaev18044434m	ncor2
						sec61g.L					znf687.S		fzd2	bmp4.L
						rpl7					LOC108719509		slco4a1.L	osbpl2.S
						rpl7a.L					trim68		LOC108715827	bmp4.S
						pcnp.L					rbm24.L		pfn4.S	eppk1.L
						rpl32.L					stk38l.S		tsc22d3.S	atg12.S
						upf1.L					stard3.L		nkx2-5.S	tmem8a.S
						rps5.L					ist1		LOC108701392	LOC108705484
						rpl36a.S					Xelaev18034047m		LOC108712047	rgs19.L
						eef2.1.L					sdf4.S		cdx4.S	rps21.S
						eif3e.L					wif1.L		snai2.S	LOC108697654
											arhgef1.S		fmnl2	rpl29.S
											znf148.S		plekhg4b	znf282
											armc5.L		lfng.S	phldb1
											bicd1.L		ctnna2	hid1.S
											dlx1		wnt4.S	b3gnt2.S
											sphk2.S		ror1.S	nectin4
											tubgcp6.L		rgs14.L	tmem208.L
											LOC108705093		p2ry1.L	gosr2.L
											tmem178b		Xelaev18028752m	atf7ip.L
											rbm25.L		epha7.L	Xelaev18016017m
											dlx6.L		barhl2.S	fundc1.L
											clk2.L		tmprss2.2.L	tram1.L
											klhl2.S		cebpd.L	rbms2.L
											atp1b1.S		LOC108719038	cope.S
											kmt2a.S		Xelaev18029531m	irak1bp1.S
											rrn3.L		Xelaev18012293m	usp49.S
											fzd8.S		dhrs3.L	gnai3.S
											bcar1.L		pm20d1.L	atp11c.L
											fnbp4.L		rasgef1a.L	rbm38.S
											fam179b.L		btbd6.L	eps8l2.S
											ppp2r2d		LOC108701275	LOC108718942
											arhgap21.S		pkdcc.2.S	tanc2
											Xelaev18025954m		LOC108702970	mlec.L
											ldb1.L		or6f1	tubb
											nptx2.S		adcy9.L	rnf114.S
											slc4a11.L		Xelaev18033620m	mansc1
											gse1.S		fgfr2.S	arnt.S
											xpo4.S		chsy3	timm17a.L
											flii.L		hgs.S	prelid1.L
											med13l.L		ncmap.L	gm20188
											med4.L		Xelaev18004205m	lpcat4.S
											esyt3.L		igf2.S	ppil3.S
											pdia6.S		Xelaev18007821m	tnfsf10l.L
											dcaf8.S		lmo3.L	oraov1.S
											znf462.L		plvap.L	pcgf3
											cnot1.S		cdh15.S	znf628.S
											calr.L		cyp26c1.S	arf1.L
											katnal2.L		ufl1	afap1l2.L
											sirt7.L		gli2.L	utp18.L
											LOC108701666		st6gal2.L	gosr1.L
											fam3a.L		LOC108711622	ptafr.L
											ncstn.S		vwc2l.2.L	elmo1.L
											calr		c4orf45.L	zfr.L
											cpd.L		mboat2	sirt1.S
											mpp5.L		reck	atp6v0a2.L
											lrrc47.L		cebpa.S	zfp36.L
											taf3.L		irx3.S	timm17a.S
											prdx5.S		rbbp8.S	vhl.S
											larp1.L		LOC108711087	slc35a3.2.S
											wdr43.L		saxo1	ccdc173.L
											Xetrov90029311m.S		epha3	tcim.L
											erf.S		prpsap1.L	uba52
											bcorl1.S		foxa2.L	kmt5b.L
											wdr13.L		emilin1.L	ap1s3
											acer3.L		crtap.L	c12orf43.L
											rab11fip3.S		slc26a5.L	ptrh2.L
											MGC68706		ntrk2.S	rpl37.L
											sik3.S		cdh2.L	acy3.L
											rbm39.L		Xelaev18010427m	tmem183a.L
											strap.L		cebpd.S	LOC108713924
											acbd3.S		papss2.S	mpdu1.L
											ubap2l		fgf12.S	ap1m2.L
											lrrcc1.L		LOC108705534	cep170b.L
											ahdc1.S		dnah11	LOC108717923
											cpeb2-like.S		tf.S	kiaa1324l.S
											cdc42ep4.S		acsbg2.S	foxo4.L
											rps2		col5a1.S	LOC108713255
											thoc6.L		pde4c	tcf3.L
											nup188.S		adssl1.S	cyp4b1.2.L
											kansl3.L		evx1.S	arid3a.S
											adipor2.S		slc25a24.L	knl1
											med23.L		helt.L	ndufc2.S
											Xelaev18009838m		gal3st1.L	LOC108702843
											prss8		mnx1	c10orf88.L
											ifrd1.S		scarf2.L	bcl2l12.S
											LOC108715136		Xelaev18028750m	rpl36.S
											mpv17.L		dkk1.L	rpl36.L
											efna3.L		Xelaev18041292m	ankhd1
											ptgfrn.S		cnga2	isg20l2.S
											cers2.L		plscr3	tctex1d2.L
											fam193a.L		gpx3.L	uqcr10.L
											LOC108706589		hdac9.S	micos13
											rnf41.S		b3gat2	utp15.S
											arl4c.S		spib.S	elovl7.L
											rpf1.L		ccdc80.L	ifrd1.L
											gps2.S		dnah6	c11orf68.L
											braf.L		meox2.L	ccnt1.L
											c21orf59.S		palm2.L	chmp4b.S
											setd1a.L		gngt2.1.L	manf.L
											psma6.S		nceh1.S	dnajb12.S
											ripk4.L		ddit3.L	dph2.L
											rsph9.L		prdm12	ptma.S
											ccdc61.L		ppp1r3e	sec61a1.L
											rpl21.L		tgfa.L	pars2.L
											kif18a.L		mnx1.S	upk1b
											rnf111-b		trabd2b.S	rpl17.S
											smg1.L		fmnl2-like.S	MGC64308
											tmed1		ppfia3.L	tia1.S
											dip2a		eya2.S	hypk.S
											taok2.L		six1.S	slc44a2.S
											bcor.S		march8.S	zmynd10.L
											zbtb17.S		cemip.L	m6pr.L
											ptbp1.L		gprc5b.S	nop10
											znf318.S		sox5.L	gnaq.L
											b3gnt2.L		runx1t1.L	wdr48.L
											xetrov90011961m.S		mamld1.S	zfc3h1.L
											yap1.S		rnf112	ankrd46.S
											iqsec2.L		MGC80611	sbno1.L
											hspbp1.L		nav3.S	rps27a.S
											cpsf1		hsh2d.S	LOC108701166
											nat9.S		mmp28.L	znf654.S
											hipk2.L		ca7.L	tmem63a.L
											top1.1.L		LOC100487499.S	unknown.S
											LOC108708226		arnt2.S	upf3b.S
											gab1.S		fsbp	srpra.L
											hp1bp3.L		mmel1.S	cks2.S
											lbh.L		tac1.L	strap
											smad6.S		ppm1h.L	tsc1.S
											ect2.L		irx2.L	kat5.L
											mesdc1.S		slc4a1.L	scamp2.S
											atp5a1.S		xlmo1	krt.S
											stau1.S		Xelaev18012801m	ift20.L
											qser1.L		Xetrov90016939m.S	sirt1.L
											luc7l3.L		abtb2.S	gpbp1l1.L
											hspa8.S		gypc.L	loc100145002.L
											nudt9.L		phactr1.S	dsp.L
											ndrg4.S		MGC115585	rpl34.L
											cfap53.L		sp8.L	elf2.S
											fscb		gprc5b.L	kiaa1191.S
											msi1.L		kng1.L	muc5b
											srsf11-like.S		ugp2.S	fam219b
											qser1.S		abhd14a.S	otub2.S
											prpf39.1.L		frem1	hm13.L
											wdr92.L		hes7.1.L	LOC108718070
											cnot4.L		pik3ip1.L	LOC108711693
											bcl9.S		ggact.L	xbp1.S
											wwc2.S		vav3.S	serbp1.L
											glyr1.S		frzb-1	upk1b.S
											spen		lhfpl2.L	rsl24d1.S
											zswim5.S		nfkb1.L	slc33a1.S
											ppp1cb.L		cdh11.L	rras2
											Xelaev18009254m		acsf2.S	cmtr2.L
											esf1.L		Xelaev18002540m	hmgn1.S
											cecr2.L		LOC108714374	wdr77.S
											fkbp1a.L		acap3.L	rpl23a.L
											ap1m2.S		krt9.1.L	kpna4.L
											LOC108695696		lama2	emc4.L
											ddi2.S		adora2b	ostc.L
											rps11		lypd6.L	rpap3.L
											ylpm1.L		fmo5	celf1.L
											bcl9.L		Xelaev18028825m	psmg1.L
											cct7.S		acap3.S	ttc4.L
											pkn2.S		c5.2.L	LOC108715906
											mkrn2.L		Xelaev18031338m	ssr3.S
											luc7l2		LOC108696906	fau.S
											ubb.L		gjb2.S	golga5.L
											eef1a1o.L		LOC108716849	chmp1b.L
											mlec.S		cdk5rap3.L	pin4.L
											pcf11.S		Xelaev18008189m	plekhj1.L
											cbs.S		LOC108706875	tmem127.S
											tmed8.S		tfap4.L	eif5.S
											sumo2.L		LOC108714006	actb.S
											LOC108698564		serpinb10.S	polr3h.L
											rpl3.L		kcnk13.L	entpd4.L
											hif-1a		znf501	znf721
											dido1.L		gpx3.S	gtf3c4.L
											psmc6-b		1700030j22rik	eef1a1o.S
											hsp90ab1.S		tcp11l1.L	cks1b.L
											rpl10.L		Xelaev18041958m	rps25.L
											hdgf.S		tmem178.2.L	farp2.S
											srsf2.S		matn4.S	etaa1.S
											serinc5.S		Xelaev18001114m	slc7a6.L
											rplp2.L		LOC108695296	cnn1.L
											son		Xelaev18027412m	wdr46.L
											psma7.S		nudt12.S	herpud1.L
											eif4b.S		npr1.S	ckap4.S
													LOC108706759	arid3a.L
													dkk1.S	tmed7.L
													cer1	thap1.L
													alcam.S	c9orf114.L
													rax.S	mrto4.S
													gad1.1.L	hnrnpdl.S
													Xelaev18033867m	rps7.S
													gnrh2.L	LOC108709420
													LOC108701848	bola2.L
													timp3.L	slc30a7.L
													wnk2	ywhab.L
													Xelaev18010400m	bloc1s1.S
													ca7.S	ldb1.S
													pappa	pa2g4.L
													mttp	sec61b.L
													snn.S	upk1a.L
													slc26a9.L	arhgap5.S
													Xelaev18033386m	clptm1.L
													plekhg1.S	mier1.S
													rab9b.L	ugcg.S
													Xelaev18039536m	snrpg.S
													sgk1.S	hgs.L
													ventx1.2.S	gtpbp4.L
													h2afy2.L	mrto4.L
													lrfn1.2.S	golga5.S
													spon1.S	afdn.S
													piezo2	cpne3.L
													sspo	rps17.S
													meis1.S	mau2.L
													cer1.S	tcp11l2.S
													hvcn1.L	trmt10c.L
													prdm6.S	khdrbs1.S
													LOC108706139	xbp1.L
													fcn1	thg1l.L
													dcx.S	smim19.L
													rundc3a	mbip.L
													kcnk6.S	ints10.L
													Xelaev18011395m	cnot9
													LOC108713993	brix1.S
													LOC108718683	c12orf10.L
													mcf2l.2.S	eif5.L
													Xelaev18008252m	pcyt1a.S
													slc12a3	cachd1.L
													LOC108701312	pfdn6.L
													pnp.L	wdr89.L
													hao1.L	rps13.S
													nck2.L	ywhaq.L
													trabd2a	znf516.S
													Xelaev18010055m	tmem263.L
													Xelaev18003796m	rpl13.S
													shisa2.S	eif5a.L
													twist1.S	sf3b6.S
													ralgds.L	kmt2a
													Xelaev18030798m	cysrt1
													slc39a5.L	grwd1.L
													prdm5.L	bcl7a.L
													mtcp1.L	gng5.S
													Xelaev18020076m	snrpd1.L
													rspo3.L	nip7.L
													ventx3.2.S	anp32c.S
													npr1.L	prmt1.S
													LOC108715350	acsl1.L
													LOC108703373	nhp2.L
													st3gal2.1.S	h3f3c.L
													cpe.L	ftmt.S
													hmha1.L	rpl18a.L
													sesn1.S	mier1.L
													stx3	hnrnpa3.L
													apobec2.L	tmed10.L
													dlx5.L	polr1d.1.S
													adamts7.L	fam160b2.L
													hmgcs1.L	llph.S
													tmem150b.L	gemin4.L
													cltcl1.S	snrpe.S
													mb21d1.L	tmco1.S
													Xelaev18013302m	ebna1bp2-a
													met.L	ube2l3.L
													rasa3.L	rab35.L
													wwc1.L	srsf3.S
													tlcd2.S	srsf2.L
													grin3b.L	snrpd2.L
													zfhx4.L
													prrt3-like.S
													ventx1.2.L
													best2.S
													loc108705532.L
													mbd6.L
													fbp1.L
													nkx2-1
													slc9a3.L
													ckmt1b.S
													fam228b.S
													Xelaev18008078m
													dbndd2
													bambi.L
													arhgap9.L
													nccrp1.L
													rdd4.L
													arl6ip1.L
													neurog2.S
													coa1.L
													slc27a3.L
													msra.2.L
													slc13a3.L
													loc100494211.L
													mespa.L
													LOC108701270
													znf703.L
													cmtm5.S
													mfsd7.L
													Xelaev18037819m
													ppp1r12b.L
													atp8b2-like.L
													Xelaev18025987m
													dhrs3.S
													gli1.S
													map1lc3b.L
													wwc3.L
													col11a1.L
													Xelaev18010316m
													fkbp9.S
													tnfrsf19.L
													caprin2
													LOC108708225
													fntb.L
													rbl2.L
													LOC108719572
													tada2b.L
													plxnd1.L
													prdm15.L
													LOC108714877
													flt1.S
													adamts3.S
													trappc10.L
													emx1.L
													fgfr2.L
													hmx3.L
													zbtb8a.2.L
													march8.L
													nexn.L
													slc15a4.L
													Xelaev18007522m
													mecom.L
													sox2.L
													dennd2c.L
													cmtm5.L
													nfe2l1.L
													b3gnt5.S
													rin1.S
													fzd5.S
													rarg.L
													itga4.S
													cmip.S
													nell2.L
													pla2g10.S
													dmrta2.L
													nipal2.S
													efnb1.L
													LOC108719506
													rell2.L
													tspan33
													LOC105947324
													Xelaev18019323m
													Xelaev18005225m
													arl6ip1.S
													tmem150b.S
													rasd1.S
													amotl2.L
													gins1.S
													f2.L
													sorcs1.S
													fhl3.S
													stap1.L
													LOC108700791
													Xelaev18039582m
													bcam.L
													impg2
													xepsin.L
													sept12.L
													cemip2
													itih5.L
													kcnj2.L
													bora.L
													LOC108717955
													capn13.S
													sema6d.S
													slc8a1
													hsf3
													sowahc.S
													gal.2.S
													mnt.L
													a4galt
													slc4a4.S
													popdc2.L
													slc47a2
													sptb.L
													LOC108720136
													inf2.S
													fbxo6.S
													ackr3.S
													Xelaev18047127m
													LOC108701311
													LOC108718211
													limd2.L
													caskin2.L
													ttll3
													col5a1.L
													slc38a3
													pcdh8.S
													Xelaev18034532m
													pcca
													LOC108715348
													tpr
													pcdh18.S
													fam3a.S
													Xelaev18017691m
													megf6.S
													ror2.S
													fkbp11.L
													ppp1r3c.1.L
													ventx2.1.S
													mespb.L
													tesk1.S
													loc100490316.L
													arhgap4.L
													cyp1c1.L
													sowahc.L
													ets1.L
													adap1.L
													prkaa2
													fam102b.S
													atp13a4
													cyp2d6.L
													slc6a20.L
													lrp4.L
													LOC108700617
													cfb.L
													tead1.L
													adrb2.L
													socs4.S
													slc25a29.L
													LOC108720003
													rgma.S
													chst3.S
													limd1.L
													fgfr1.S
													LOC100497556.L
													foxc2.S
													mettl24.L
													abcc5
													bhlhe22.S
													p4htm.L
													sema4c.S
													Xelaev18008648m
													mob2.2.L
													tbr1.S
													rab40b.S
													nckap5l.L
													rassf1.L
													hivep2.L
													ppp1r14c.L
													Xelaev18041019m
													Xelaev18019576m
													ranbp3l.S
													LOC108711632
													rasgef1a.S
													Xelaev18023478m
													xmc.S
													lrrn3.L
													LOC108719089
													cyp26a1.L
													pnhd.L
													LOC108698553
													fgfr4.L
													suox.S
													mespb.S
													cdh11.S
													aplnr.S
													tmem238.S
													rapgef2.L
													pabpc4.L
													ntn3.S
													cdc14a.S
													trim67.S
													LOC108699675
													pkdcc.2.L
													zhx1.S
													mcm5.S
													rasa3.S
													cish.L
													LOC108707019
													tekt2.L
													aebp2.L
													LOC108716948
													fam169a.L
													sgk1.L
													slc23a2.L
													gata6.L
													klf17.L
													pik3ip1.S
													col9a2.L
													LOC108696520
													sptbn2.L
													chp1.L
													lmod1.S
													ackr3.L
													gli1.L
													c10orf71
													adcy5
													LOC108715287
													mcm10.L
													LOC108706318
													tacc3.L
													sox9.L
													rnf146.S
													znf362.L
													myo10
													fam120c.S
													cnksr3.S
													tacc3.S
													fras1.L
													gpr1.L
													bambi.S
													arhgef38.L
													dhx32.L
													LOC108705424
													lmo1.L
													ephb4.S
													pcdh10.L
													glrx5.L
													tsc22d3.L
													LOC108720035
													skor1.L
													Xelaev18006019m
													LOC108712518
													LOC108698396
													st6galnac2.L
													gata4.L
													mcoln1.L
													smc4
													pvrl3.L
													smo
													aldh1a3.S
													chrd
													eml1
													itga5.S
													LOC108698306
													pidd1.L
													cdc7.L
													mob2.2.S
													n4bp3.L
													auts2
													znf644.S
													LOC108696274
													enc1.2.S
													Xelaev18020975m
													slc4a2.S
													uhrf2.S
													sav1.S
													zbtb8a.1.L
													ephb4.L
													LOC108701215
													lct.1.L
													mid1
													MGC81337
													rapgef2.S
													frzb.S
													otx1.L
													caprin2.S
													mig30.S
													ankrd10.L
													rgs3.S
													LOC108707159
													Xelaev18003283m
													Xelaev18026877m
													xvent-2b
													fank1.L
													sh2b2.L
													bod1
													polr3gl.L
													foxn3.S
													ddx23.L
													armc1
													loc100494211.S
													LOC108703537
													klf13.L
													adcy5.S
													foxn3.L
													znf341.L
													Xelaev18000592m
													ahcyl2.S
													endod1
													lhfpl2.S
													LOC108700185
													retn.2.L
													rhou.L
													Xelaev18009472m
													nr1i2.L
													loc108718659.L
													loc108715171.S
													znf208
													cblb.S
													pank1.L
													arl4a.L
													LOC108712665
													ifltd1.S
													larp6.S
													plscr3.L
													clcn3.S
													slitrk5.L
													Xelaev18002117m
													atp1b3.S
													smo.L
													cdknx.L
													dynll2
													afap1l2.S
													pmp22.S
													col9a3.L
													nrp2.L
													col9a1.L
													phactr2.L
													fam83f.L
													LOC108715129
													eaf1.L
													has1.S
													rassf8.S
													klf10.L
													Xelaev18001689m
													ccnt1.S
													znf217.S
													id2.L
													slc5a8.L
													tm2d1.L
													LOC108703739
													disp1.L
													LOC108707147
													mpzl2.L
													lrrn3.S
													hydin.S
													nipal2.L
													hs3st3a1.L
													Xelaev18002137m
													ror2.L
													nkx2-3.S
													pbx2.L
													atp1b1.L
													fmc1.L
													unk.S
													MGC81482
													ilk.S
													nkd1.L
													LOC108720014
													dusp11.2.L
													itgb3.L
													LOC108715064
													rnf44.L
													LOC108701786
													epn1.S
													mzt1.L
													LOC108700983
													krt18.S
													usp43
													plxna2.S
													srgap2.S
													msx2.S
													rfwd3.S
													stk40.S
													akap2.S
													polr2k.S
													fn1.S
													trim8
													LOC108719513
													dstyk.S
													Xelaev18024078m
													fbxo21.S
													baz2b.S
													ell2.S
													cdk17.L
													fblim1.L
													ccdc85c.L
													LOC108708347
													rnf144b.S
													larp7
													zdhhc17.L
													slc10a3.S
													avp.L
													tiam1.L
													cited4.L
													phactr4.L
													arhgef26.S
													ndrg4.L
													mlxip.L
													LOC100189574
													LOC108715723
													zbtb8a.1.S
													asb1.L
													pcgf1.S
													capn2.2.L
													dnah12.L
													agrn
													rassf8.L
													zbed6cl.L
													rpusd1.L
													LOC108704158
													fbxw2.S
													pank3.S
													hdac10.L
													cep63.L
													gcnt1.S
													trim36.S
													loxl1.L
													znf292.S
													cyp27a1.L
													psd3
													slc25a24.S
													fxyd3
													tcf7l1.S
													sema6d.L
													gramd1a.L
													smad7.L
													Xelaev18019575m
													znf618
													lrrc24.L
													pdk4.S
													enoph1.S
													zdhhc21.L
													ralgds.S
													gtf2ird2b
													c5orf30.S
													e2f1.S
													pced1a.S
													mespa.S
													camta1
													slc35d2
													tonsl.L
													loc495835.L
													bcr.S
													snx33.L
													LOC108713986
													tgif1.S
													LOC108716719
													capn8.1.S
													LOC108708505
													ipmk.L
													gatd3b
													gatm.S
													kcnk6.L
													znf451
													LOC108716737
													LOC108717369
													mis12.L
													zbtb44.L
													pdp1.L
													nrdc.L
													ciz1.L
													rcan3.L
													kcne5.L
													thumpd2.L
													mgea5.L
													ptpn4.S
													cdca7.S
													ccdc71l.S
													apoc1-like.L
													erbb3.L
													slc6a8.S
													gprc5c.S
													cd276.L
													mpv17l.S
													gigyf2.S
													atp1b3.L
													LOC108699904
													fam13a.S
													sfrp2.S
													Xelaev18029805m
													rbm23.L
													arfgap3.S
													adcy9.S
													tfe3.S
													hunk.S
													med10
													rbms1.S
													esg2-a
													LOC108719648
													jag1.L
													dusp4.L
													pou5f3.1.S
													gpc4.S
													mapk8ip1
													znf800.L
													gyltl1b.L
													klhl25.L
													rab11fip4l.L
													gatm.L
													plpp3.S
													nt5dc3.S
													znf518a.L
													c2orf42.L
													myo10.2.L
													metrnl.L
													mgc69520.S
													ctdsp2.S
													prkce
													mmrn2.L
													cenpc.L
													rgs11.L
													acer3.S
													foxa1.L
													gse1.L
													wdfy2.L
													LOC108698093
													c15orf39.L
													ufc1.S
													stox2.L
													rarg.S
													mgc75753.S
													cry1.L
													slc6a14.2.L
													Xelaev18006061m
													ccnd2.S
													dzip1.L
													yeats4.S
													prr12.L
													zfp36l2.S
													LOC108710017
													prss33
													Xelaev18044534m
													LOC108697537
													znf703.S
													znf268.L
													peli2.L
													Xelaev18017186m
													usp21
													spsb3
													LOC108706094
													stag2.S
													Xelaev18042341m
													prdx5.L
													hs3st3a1.S
													nos1ap.L
													tob2.S
													schip1.S
													LOC108719535
													lin9.S
													LOC108711758
													arhgef40.S
													numb.L
													reln.L
													b3gnt7.S
													epas1.S
													dtl.S
													wdr83os.S
													ubtd1.L
													rrp8.S
													git1.L
													vcan.L
													als2-like.L
													tgif2.S
													ccng2.L
													fsbp-like.L
													cacnb4.S
													fzd5.L
													mgc75753.L
													mgea5.S
													ccnb3.S
													rbak-rbakdn
													LOC108703993
													nfil3
													mta1.L
													rbbp8.L
													pi4k2b.L
													atf7.L
													dnaja4.2.S
													nrp2.S
													acsf2.L
													rbm26.L
													adcy6.L
													Xelaev18002446m
													tfap2a.L
													mapk6.L
													myo9b.S
													elp5
													pgbd4
													kirrel2.L
													slc22a23.L
													c5orf30.L
													ccnb3.L
													elmo1.S
													Xelaev18032193m
													f2rl1.L
													mta1
													ccne2.S
													camk1g
													tab3.L
													top2a.L
													xkr5.L
													Xelaev18003895m
													calm1.L
													kcnq1.L
													wrb.S
													irak2.L
													LOC108705295
													MGC52759
													lsm14b.L
													nek6.S
													dck.2.L
													fth1a
													ptpn13.L
													zbtb45.L
													kmt2e.S
													LOC108695509
													znf319.S
													arhgef2.S
													tada2b.S
													mfge8.L
													inpp5k.L
													cdc25b.S
													mycl.L
													fth1.L
													creb1.L
													chn1.L
													pcif1.L
													foxo3.L
													pdha1.S
													draxin
													sema4c.L
													det1.L
													dhx33.L
													fyb.S
													nadk2.S
													jund
													cnnm3.L
													tmco3.L
													nos1ap.S
													klhl21
													LOC108704271
													cenpj.L
													maats1
													b4galt6.L
													has-rs.S
													LOC108718634
													tcf7l1.L
													mknk2.S
													vgll4l.S
													rybp.S
													rfx5.S
													tubb.L
													dyrk2
													prdm10.S
													bach2.S
													prr5l.L
													c22orf39.L
													sptbn1
													whsc1l1.L
													mettl7a.L
													kdm6a
													krasl.S
													zdhhc21.S
													cdk16.L
													esyt2.L
													slc26a11.L
													grasp.S
													ptch1.L
													gramd1a.S
													mycl.S
													hes6.1.S
													midn.S
													Xelaev18038135m
													pcif1.S
													morf4l1.L
													nt5c1a
													atrx.L
													syne2.2.S
													MGC82989
													ric1.S
													znf106.L
													rere
													chrd.2.L
													LOC108709261
													crebbp.S
													cep250.S
													gnai2
													dgat1.L
													pcdh1.L
													eral1.L
													kdm6b.S
													chrd.L
													celsr1
													tomm7.L
													Xelaev18038498m
													smarcd3
													spop.S
													rere.S
													kansl1
													mbd1.S
													rbmx.L
													prc1.2.L
													gtf2ird2
													cdca7.L
													MGC84997
													plekhn1.S
													ehd1.L
													c18orf54.S
													smad4.1.L
													grsf1.L
													LOC108710532
													sfr1.L
													lasp1.L
													clcn3.L
													LOC108719519
													shroom2.L
													e2f7.S
													LOC100495010.S
													sema3a.L
													tfdp1.L
													pnisr.L
													ovol2
													endou.S
													phldb3.L
													lef1
													msantd4.S
													hnrnpa1.S
													ptbp3.L
													fndc3a.L
													dlc1
													rnf2.S
													igf1r.S
													rnaseh2b.L
													ano5.L
													phrf1.S
													efna4.L
													rpl29.L
													usp6nl.S
													dnase1l3
													cdip1.L
													asxl1.S
													gmeb1.L
													rfwd3.L
													asb7.L
													rrm2.2.L
													LOC100485290.L
													accs.L
													zfx.L
													gigyf1.L
													uimc1.L
													aamp.L
													casc4.S
													cep152.S
													etv1.L
													krt18.L
													znf292.L
													tmem222.L
													aurkb.L
													tulp3.L
													gnai2.S
													luc7l3.S
													rad51.L
													sf3b5.S
													zswim5
													rbm12b.L
													pcdh19
													aasdh.L
													vgll4.L
													scin.L
													surf6.L
													tmem111.L
													marcksl1.L
													hist2h2ab.S
													ggt1.L
													krt5.1b
													slc50a1.L
													c21orf91.L
													gpc4.L
													tmsb4x.L
													hnrnpa3.S
													mtfr1l.S
													arid3b.L
													fhdc1.L
													acads.L
													gpbp1l1.S
													dhcr7.S
													slc25a28
													znf516.L
													yeats4.L
													cdon.L
													rps29
													marcksl1.S
													igf2bp3.S
													c6orf62.S
													foxa1.S
													rnf26.L
													fam208a.S
													eif3a.L
													LOC108704245
													exo1.S
													arih1.L
													sri
													slx4.L
													mtf2.L
													agpat3.S
													xpr1.L
													siah1.S
													ddit4.L
													psma5.L
													rbm5.L
													lbr.S
													znf668.L
													hunk.L
													slbp.S
													timm23
													sppl3.L
													rab40b.L
													emd.S
													fus.L
													ppp1r16a
													kmt2d.L
													bivm.L
													incenp.L
													gsk3a.S
													cyfip1.L
													eif4g3
													ddx6.S
													gltscr1.L
													dyrk3.S
													tdrkh.L
													sgol1.L
													lypla1.S
													kat6a.S
													kdm5b
													ppig.L
													hnrnpk.S
													hnrnpll
													ctbp2l.L
													myef2.S
													mknk2.L
													ilf3.L
													ralb
													cdon.S
													LOC108714722
													tnk2l.L
													rps3.L
													safb.L
													gnb2l1
													prrc2b.L
													fkbp1a.S
													sp1.L
													hmgn3.S
													cst3.S
													nsa2.L
													ube2s.S
													rps15.S
													fnbp1l.L
													pabpc1.S
													gltscr2.L
													tcf12.S
													sec13.S
													cnot1.L
													kat8.L
													arfrp1.L
													sfpq.S
													hnrnpu.S
													cgn.L
													wiz.S
													ilf2.L
													pcca.L
													efs.S
													cbx5.L
													zbed4.L
													ubb.S
													MGC53694
													smarce1.S
													cdk2.L
													h3-3b
													snrpf.S
													nfrkb.L
													vangl2.L
													casp8ap2
													mthfd2.L
													glul.S
													npm1.L
													fxr1.S
													nucks1.L
													glul.L
													map4k4-like.L
													hnrnpm.L
													mybl2.S
													ddias
													hmgn3.L
													ywhab.S
													rbm33.S
													anp32e.L
													rbm8a.L
													rpl6.S
													svip.S
													anxa7.L
													u2af2.S
													ubc.L
													wasf2.L
													odc1.L
													n4bp2.L
													fbl.L
													rac1.L
													cpsf6.S
													pabpc1.L
													ctbp2.S
													tpm4.L

## Sheet: St11-12_Decrease
List of Genes for all Overlapping Temporal DESeq Groups, corresponding with supplemental figure 3
All_Lineages	Epi-Meso-Neur	Epi-Meso-Endo	Epi-Neur-Endo	Meso-Neur-Endo	Epi-Neur	Epi-Meso	Epi-Endo	Neur-Meso	Neur-Endo	Meso-Endo	Epi	Neur	Endo	Meso
LOC100036828	homez.L	bora.S	atp2c1	pawr.L	dag1.S	cdt1.L	dnaaf1.S	cdca7l.L	cul4b.S	bag4.S	kif2a.S	ppp1r15b-like.S	kif22.S	gcfc2.S
mfsd14b	ets1.L	tmem184c.L	smagp.S	dbf4b.L	slc26a6.L	banp.L	itsn1.L	LOC108704624	cct6a.S	tceanc2.S	gucd1.S	tfap2a.L	rae1.S	enkd1.L
letm2.S	ccdc88a	umad1.L	esco1.L	pcyox1.L	cers3.L	usp19.L	myo1c.S	fbxo42.L	racgap1.S	slc35b3	adam17.S	capn5.S	wapl.L	ist1.S
ralb.L	pag1.S	inpp4a.S	dctpp1.L	fam46c.L	LOC108719063	taok1.L	aldh3b1.L	sbf2.L	spty2d1.S	bloc1s6	ascc3.L	rpn1.S	tpx2.L	eif2b5.S
rnf8.L	foxh1.S	rwdd1.L	Xelaev18046477m	stk35.S	LOC108711716	atg2b.S	lonrf2.L	ccny.L	fam46c.S	syap1.L	smtn.L	srp68.S	sec24a.L	arhgef39.L
rassf2.L		plxna1.L	slc9a7.S	LOC108701404		pnpt1.S	LOC108718446	ets1.S	stx5.S	mmadhc.L	trove2.L	arfgap1.S	kiaa0430.S	xiap.L
nfkbie.L		golim4.S	n4bp1.L	tor1b.L		inpp5f.L	trak2.L	atoh1.S	yrdc.L	rnpepl1.L	btrc.S	dnajc10.L	zcchc8.L	cul3.L
tmem255a.S		ccnb1.2.L	ccdc68.S	slc8a3.L		ern1.S	atg2b.L		ddx1.L	rab14.S	LOC108719053	rfwd2.L	pi4kb.L	edc4.L
arl15.L		uxs1.S	atxn3.L	c11orf96.S		natd1.L	zdhhc16.S		twistnb.L	lamp1.S	prkar2b.S	gpat4.L	atxn2l.S	ctu1.L
mtmr10.L		lrp1.S	hexdc.L	ern2.S		abr.L	tstd2.S		dusp11.L	hmces.L	MGC84586	mex3d.S	jmjd6.S	nos1ap.L
styx.S		smn2.S	cdc42se2-like.2.L			ttc9.L	tnrc18.S		gatad1.L	arfip1.S	xxylt1.L	LOC108705673	sbno1.S	letm1.S
usp38.L		pold2.L	MGC83970			txlng.L	ccdc34.S		raf1.S	ncald.L	pag1.L	pim3.S	gpatch4.L	kcnab2.L
gemin2.S		usp38.S	slc9a1.L			pfkfb3.L	wdr44.S		usp22 a	slc9a3r1.L	map7d1.S	wdr37.L	phf3.L	gstcd.L
fam20b.S		rbm27.S	pef1.S			actr1a.S	ssbp2.S		poldip2.S	tuba4.S	dhcr24.L	h2afj.L	kif20a.S	ptdss2.L
fam107b.S		plpp1.L	ralgps2.L			pard3.L	gpatch2.L		slc9a6.L	kiaa0226l.L	rad54l	h2afj.S	sucla2.L	igf2r.L
LOC108719547		kif21a.L	Xelaev18024710m			ankrd28	hs2st1.S		slc39a9.L	daam1.L	rpa3.S	znf282.S	rbm26.S	rhou.L
kiaa0513.L		fam46b.L				arl5a.S	sec24b.L		mfsd11.S	mkrn3.L	mesdc2.L	polr3g.L	ilvbl.L	ubxn4.L
arhgef12.L		slc30a9.S				dph5.S	nkrf.L		ppp1r15b.L	hdac4.S	plcd3.L	insm1.L	gna14.L	sh3bp1.L
tapt1.S		znf182				pcdh8.L	ankrd13c.S		nploc4.L	tyw3.L	fadd.S	atoh1.L	MGC131268	ccdc120
dap.L		ppp1r9al.L				pid1.L	arfgef1		abl2.L	raf1.L	dpy19l3.L		tmem33.L	map7d1.L
ptges2.L		trpm7.L				faah2	LOC108713105		insm1.S	znf618.S	ube2j1.L		napa.S	znf276.S
appl2.L		arntl.S				lrrc28.L	nusap1.S		trmt6.S	nup54.L	kmt5a.L		snx5.S	fam63a.S
pik3r2.L		snx7.L				cbl.S	parg.L		fam20b.L	plxna1.S	ccdc90b		pum2.L	wls.L
dhx35.S		slc12a6.S				LOC108719494	plekhg4.L		LOC108699992	cask.L	acadsb.L		ammecr1.S	setd4.L
fam210a.S		tpcn1.L				dgkz	aim1.L		naa15.S	mpp6.L	kdm4c.L		pdcd10.S	grb2.S
uba3.S		slc2a10.S				pdk4.S	rps6kc1.L		cmtm4.S	MGC81661	limk2.S		ehmt1.S	ppa1.L
inf2.L		csnk1e.S				nhej1.S	LOC108719643		kif22.L	strn	maea.S		nol9.L	pitpnc1.S
pou5f3.3.L		med18.S				tlk1.L	atp9a		scn1b.S	tada3.L	rab27b.S		pphln1.S	zfand3.S
ralgapa1.S		abhd16a.L				zic2.S	tbc1d4.L		dus4l.L	pik3c2a.L	snx14.L		nras.L	afg3l2
dapl1.L		plxnb2.L				enox1.S	znf407.L		rita1.S	arih2.S	c5orf24.L		rpa3.L	lonrf1.S
znf33a.L		rnf14.5.S				LOC105947450.S	nbeal1.L		ifrd2.S	naa16-like.L	acat1.L		kpna3.L	prrg1.S
nlk.L		pdcd6.L				nin.L	tgs1.L		slc18a2.L	slc10a7.L	grinl1a.S		nampt.L	cpped1.L
ccdc88a.S		alkbh8.S				dcp1a.S	bloc1s6.S		ythdc2.L	mmp15.S	ap5m1.L		top3b.L	plekhm2.L
cracr2b.L		neurl1b.L				tada3.S	tll2.L		chmp1a.S	slc30a2.S	rgma.S		tmed7.L	agpat4.S
cited2.L		slc22a15.2.S				agpat5.L	zmym4.L		otud4.S	trim25	ranbp9.S		dusp11.S	prss36.L
arhgap26.S		ipo8				lrba.L	rabep2.L		prr14l.L	whamm.L	ctdspl.L		fam98b.L	dscc1.L
LOC108719557		tmf1.L				atg4c.S	psip1			lman1.L	krt19.L		tk2.S	fam98a
Xelaev18030392m		lrrfip2.L				pla2g4f.L	stam.L			glmp.L	gdpd5.S		LOC100653495	fam171a1.S
foxi2.S		klc1.L				specc1	inpp5a.1.S			pde7a.S	atrx		cttn	ppp3cb.L
		jak2.L				pgk1.L	vps13a.L			gpn2.S	snx1.S		dgcr8	prelid2.L
		dcaf6.L				ubox5.S	tmbim1.L			pigb.S	nabp2.S		stk11ip.L	col4a3bp.S
		lrp1.L				lnx1.L	arl5b			plin3.L	casp10.S		map7d2.S	hs2st1.L
		ubr2.S				mpp7	usp36.S			mettl16.L	nbas.L		loc733209.L	gpd2.S
		dgcr6.S				ldlr.S	ubr2.L			cenpa.L	herc2.S		c18orf25.L	chp1.L
		cep120.L				tmem39b.L	rcc1.S			thada	tspan14.L		nedd1.L	cc2d1b.S
		tyro3.L				ehbp1	thap1			tbc1d12.L	cbx2.S		pkd1l1.L	e2f7.L
		smarca5.S				LOC108704254	adam28.1.S			dus1l.L	tdrp.S		usp24.L	ca10.L
		abhd17a.L				grb10.L	ipo13.S			csnk1g2.L	mkln1.S		pacsin2.L	zfhx2.S
		kctd6.L				armt1.L	atp8b4.L			tp53i11.S	uggt2.L		fzd8.L	anapc4.L
		dcaf5.S				rif1.S	neil3.L			extl3.S	LOC108704332		myof.1.L	chst7.L
		smtnl2.S				socs5.S	gdf9.L			haus6.S	cisd2.S		tmem110.S	map4k4-like.L
		usp25.L				LOC108701852	fez2.L			usp32.S	kidins220.L		hook2.L	pigt.L
		bnipl.L				lamp1.L	plk3.L			pdcd10.L	clcn3.L		eya3.L	gchfr.S
		pdpr.L				dnmbp.L	mios.L			cep83.L	dsg2.S		ppp3ca.L	katna1.S
		csnk1g3.S				stk11.L	LOC108696874			brca2.L	atrn		nacc1.L	trim39
		calhm2.L				LOC108719558	hmgxb3.L			fastkd5.L	velo1.L		avl9.L	pqlc2.L
		polg.L				gpr155.S	itprip.S			pwwp2b.S	st3gal6.L		trhd.S	slc39a9-like.1.L
		anks1a.S				pdzd2.S	tubd1.L			ubac1.S	mib2.L		polr2i.L	ppm1e.S
		batf3.S				azi2	ppp1cc.L			ivns1abp.L	tmem123.L		wdr26.L	gpr180.S
		trpv4.L				sorbs1.L	krit1.L			nckipsd.S	pxn.L		pou5f3.2.L	sh3pxd2b.L
		magi1.L				bpgm.S	zdhhc5.L			snx9.S	ubtd2.L		adnp.S	tmem242.S
		tspan1.S				mast2.S	f2rl1.S			tamm41.S	tmcc3.L		ddx3x.L	pid1.S
		mgat4a.L				herc3.L	mphosph9.L			hist1h2aa.L	itpr1.L		rad54l2.L	mfn2.S
		tvp23b.S				zfyve28-like.1.S	ripor1.L			rasef.S	tlk1.S		ube2k.S	dda1
		atg4c.L				atp6v0a1.S	gpr155.L			map2k7.S	tep1.L		stxbp3.L	mad2l2.S
		chmp1a				sh3pxd2b.S	tax1bp1.L			pou2f1.S	znf518b.L		tjp1.S	tbc1d10b
		pde4dip				tgif2.L	ccar1.L			coq10a.L	tmem51.L		edrf1.S	adcy7.L
		shf.S				naa60	nde1.L			itsn2.L	casp8ap2.L		micu1.S	spata13.S
		fbxo25.L				bri3.S	per3.S			depdc4.L	gpi.S		dhx37.L	slc35a3.2.L
		rab21.L				tgif2.S	smagp.L			top1.2.S	LOC108719510		nf2.S	rfc1.L
		Xelaev18030357m				prkch.L	znf239			gramd1c.L	sin3b.L		lrrc1.L	tln2.S
		gpr137c.S				ubtd2.S	tarbp1.L			tmem115.L	ap2b1.L		ccnt2.S	znf347.S
		capn15.L				pcgf2.L	kank3.S			mrpl1.L	amfr.L		tnpo1.L	usp3.L
		ctage5.L				dusp7.L	camsap2			ubac1.L	pex14.L		ptgfrn.S	man1a2.L
		tbc1d22b.S				arhgap26.L	ptp4a1.L			gs17.S	abhd17b.S		csnk1g1.L	cog1.S
		topors.S				arhgef18.S	exoc5.L			loc100126636.S	nr2c1.S		ythdf3.L	LOC108699273
		LOC108709626				MGC115510	dusp5.S			grip1	best2.L		manf.L	necap1.S
		LOC108714398				dsc3.S	gas2l3.L			svil.L	prdm1.S		ptprf.S	timeless.S
		wdfy3				syne2	git2.L			fam210a.L	sesn3.S		rabl6	zranb3.L
		tulp4.L				plekhm3.L	ikbkg.L			setd7.L	dhrs7.L		chaf1a.S	birc6.L
		LOC100301958				abhd12.L	vps50.L			gpkow.L	gpc4.L		spata2l.L	hells.L
		fmn2.L				dnajb14.L	znf407.S			birc6.S	sh3bp4.L		fscn1.S	zw10.S
		siva1.L				dtna.S	scyl2.L			arl6.L	lclat1.S		ctf1	asap1.S
		fopnl.L				sh2d3c.L	taok3.L			smarcal1.L	LOC108704201		plin2.S	tmem184b.S
		ppp1r13b.L				traf4.S	dpy19l4.S			tor1b.S	dact1.S		hmg20b.S	slc30a4.L
		herc1.L				cry4.L	rev1.L			cuedc1.L	rmdn3.L		dnaja4.1.L	sptbn1.L
		gpr137c.L				zic2.L	nfatc3.S			ubl3.S	mterf3.S		zbtb49.L	dctn2.S
		gab2.L				fam102b.L	pigb.L			orc6.L	pacs1.L		irf6.2.S	sec31b.S
		dip2a.S				dapk1.S	LOC108695538			dck.1.L	tsc1.L		pop1-like.L	st3gal-iii
		LOC108714350				znf41.S	brpf3.S			mapkapk2.S	dlg5.L		shkbp1.L	uap1.S
		eif4e3.L				tspoap1.L	tnrc18			gls.L	znf845		mettl9.L	atrn.L
		cep41.S				rab31.L	nfatc3.L			LOC108719533	pcmtd2.L		dpy19l1.L	sdha.S
		znf335.L				kank1.L	fancb.L			mfsd12.L	nfkb2.S		socs5.L	cntrl.L
		vcpip1.S				grin2b.S	cpsf4.L			lpar6.L	numa1.S		lman2.S	ccdc67.L
		pomk.L				tmem158.S	edem3.L			gatsl3.L	klf4		zcrb1.L	dcaf1.L
		glce.L				ccdc102a.L	rab33b.L			rcor2.L	ndst1.S		cpd.L	osbpl11.S
		gbf1.L				zbtb16.S	phc3.L			hectd4.L	xarp.L		knstrn.L	tbc1d9b
		prdm9.L				cbarp.L	cgnl1.L			ctsd.S	apcdd1.L		nfkbia.L	elmod3.S
		prss16.L				marchf2	zc3h14.S			ppfibp2	cr1b		thoc7	tctn1.L
		slc15a4.S					ripk1.L			lin54.S	irx1.L		hif1an.S	tubg1.S
		dcp1a					ano1.L			ints14.S	hdac7.L		triap1.L	ttc7b.L
		nedd4l.S					ppp1cc.S			gtdc1.S	lrrc19.L		chd7.L	madd.L
		MGC115657					srebf2.S			ecsit.S	cflar.L		ganab	tsnare1l.S
		sorl1.L					lmo7.S			rnf170.S	ptpn12.S		slc31a2.S	tor2a
		itpkc.L					cog3.L			mxi1.S	tgfbr1.S		eef1akmt3.L	agap1
		atl2-like.S					yes1.L			tasp1.S	tifa.L		zhx2	casp2
		chn1.S					irs2			scarb2.S	hdac4.L		sec24d.S	sec22a.L
		tube1.L					clec16a.L			slmap.S	xplcg1a		shcbp1.L	scd.L
		exd2.L					golga2			dennd5b.L	upk2		scoc.S	mtrr.L
		crtc3.S					r3hdm4.S			scap.L	pomgnt2.L		cdv3.L	fbxo42.S
		csnk1g3.L					kat2b			dph3.L	tdrp.L		cchcr1.L	taf1d
		klhl7.S					irak1.L			gpi.L	mysm1.L		uprt.L	zfand3.L
		inpp4a.L					anapc7.L			eif4enif1.S	c7orf60.S		fam122a.L	abhd11.L
		tuba4.L					oxct1.L			trim7.S	akap12.L		ccne1.S	fpgs.S
		sbk1.L					cep164.L			lin9.L	trpm7.S		wdr82.L	pard6b.L
		rev1.S					dgke.S			tmem131.L	c12orf66.L		fam26d.L	cry-dash.L
		b3gnt4.L					sbf2.S			ankrd35.L	il6st.S		iqgap1	lace1.L
		csk.L					snx10.L			naa60.L	c1orf159.L		zfand6.L	tcf19.L
		tmbim1.S					larp1b.S			picalm.1.L	usp40.L		golga2.S	plekha1.S
		hgsnat.L					atp8a1.L			mdm1.L	hspbap1.L		lrrk1.L	klhl18.S
		dnajc14.L					dmtf1.S			mex3b.L	asphd2.L		ift122.L	suv39h1.L
		mfsd14a					sipa1l1.L			rnpepl1.S	rapgef2.S		sbf1.S	usp13.L
		inpp5b.L					tubgcp3.S			arhgef18	brf1.L		ocrl.L	gyltl1b.L
		pign.S					cnst.S			pigh.L	tmem55a.S		nnt.S	osbpl9.S
		ywhag.L					b3gnt5.L			hnrnpll.L	sox3.S		atxn2.S	hps5.L
		loc733556.L					mov10l1.L			pdpr.S	LOC108714950		alg10.S	phlpp1.S
		Xelaev18045296m					fez2.S			LOC108706563	kifap3.L		fam91a1.L	oma1.S
		klhdc10					blcap.S			bod1l1.L	b4galt2.L		btaf1.L	heatr5a.L
		atr.L					plekhg3			lpar6.S	acaca-like.S		gpatch11.L	jak1.L
		LOC108699095					itprip.L			arhgap33.L	epha4.L		aldh7a1.S	telo2.L
		spag9					tubgcp5			baiap2.S	ankrd27.L		ppp1r9a.S	lpp
		loc734029.L					ankrd54.S			myo1e.1.L	pcsk7.L		brwd3.L	fut8.L
		haus3.L					irf6.L			huwe1	mpzl2.L		pomgnt1.S	st7.L
		pex1.L					LOC108716797			zar1l.L	pfkfb3.S		stag1.L	LOC108699944
		atl2.L					plekhg1.L			dock5.L	usp32.L		man2a1.S	dennd1a.L
		LOC100127794.L					cntln.L			tbc1d8	prdm14.S		c18orf8.L	maz
		mast2					LOC108706119			homer3.S	sil1.L		c12orf49.L	gde1.L
		arl5c.L					ankrd13c.L			ptpra.S	dhx40.S		med26.L	rnf123.L
		fam109b.L					spg11.L			neurl4.S	ttc37.L		utrn.L	MGC130950
		snx13.S					prickle4.S			gng4.S	ei24.S		ryk.S	tom1.S
		nfxl1.L					mapkapk5.S			kifap3.S	cbwd1.1.L		phf3.S	sds.L
		Xelaev18031390m					myod1.L			pigs.L	atp10b		atp2b1.S	mbtps2.L
		atp13a4.S					atp12a			rhob.L	slc6a14.2.L		npm3.S	pla2g12a.S
		klhdc10.L					mb21d2.S			abr.S	c12orf66.S		pum2.S	LOC108704645
		zfp36l2.2.L					pgm2l1			megf11	ube3c.L		MGC83673	mink1.L
		wasll.L					tmem169.L			spdl1.L	LOC108707483		tgif1.L	shf.L
		srgap2.L					spry1.S			daam1.S	tnfsf11.S		MGC80416	flnb
		dnajc13.L					stc1.L			mex3b.S	znf234.L		mgat4a.S	dgkq.S
		trappc8.L					pigc.L			letmd1.L	sall3.S		dnal4.S	cep70.L
		lrrc16a.L					ccdc3.L			tango6	phf19.S		map4k5	angel1.L
		dctn4.L					arhgap11a.2.L			tmf1.S	atxn1.S		ercc8.S	pkmyt1.S
		mast4.S					chst8.S			st3gal1.S	ank3.S		shprh.S	eps8.S
		taf4b.S					usp46.L			clint1.L	chst10.L		tnfaip1.L	mal2.L
		borcs6.S					mcf2l			gpd2.L	chd6.S		bod1l1	acot11
		prrg1.L					has2.L			znf585b.S	sepsecs.L		magi1.S	plekhm2.S
		dock9					cdc42ep2			taf5l.S	socs3-like.1.L		ctbp1.S	josd2.L
		dock4.L					apold1.L			xl64phr	grm8.L		ubac2.L	sulf2.S
		zyg11b.S					mix1.S			grb10.S	csk.S		gipc2.S	mtss1.1.S
		dgkq.L					zeb2.L			capn15.S	LOC108700142		bptf.S	LOC108695561
		keap1.L								LOC100191024	sox21.S		cdc23.S	commd2.S
		dapk1.L								sos1.L	gmnn.S		snx17	kcnh6
		LOC108709196								MGC81124	klhl22.L		raver2.L	impad1.S
		tnfsf11.L								aktip.L	gpm6b.S		sin3a.L	tmem164.L
		rfwd2.S								slc39a1l.L	tex2.2.S		cand1.S	znf395.S
		atp8a1.S								pja2.S	foxp1.L		pik3c3.S	tpcn2.L
		ska2.L								camkk1	mgc69520.S		znf639.S	asb3.S
		ccdc50.S								LOC100158299	snx25.L		Xelaev18042112m	ddhd1.S
		dapl1.S								gng10.L	kcp.L		fzd7.L	loc100158410.L
		akap9.S								clasp1.L	bcl9l.S		gnl1.S	cdc6.L
		tradd.L								r3hdm1.S	tbc1d4.S		mast3	slc9b2.S
		zcchc11.S								tbc1d23.L	fcho1.S		snx31.L	not.S
		fry.L								pacsin3.L	sox8.S		MGC97820.L	sptbn5.L
		ccdc158								LOC108695555	thap7.S		ptp4a3.S	prrc2a.L
		arhgap18.L								aak1.S	LOC108699896		trmt12.L	reep6.L
		hectd4.S								rad51c.L	ssh2		zmym2.S	mtrf1l.L
		rnf41.L								prkag1.S	stambpl1.S		picalm.L	LOC100158389
		cttnbp2.L								fam110c.L	pms2.L		slc39a7.L	secisbp2l.S
		pxylp1.S								LOC108714146	MGC115291		ncln.S	Xelaev18014048m
		mgat4b.L								kiaa0100.L	sacs		heatr5b.L	sh2b1.S
		pou5f3.3.S								grem1.L	adcy9.S		nkap.L	spast.L
		fam46b.S								abcb6.L	mcoln2.L		Xelaev18009838m	fam110c.S
		filip1.S								rnf130.S	gpr4.S		wdr89.L	tsen34.L
		fbxl4.S								lrrc58.S	kiaa0513.S		caap1.L	lipg.L
		pik3ca.L								slc30a5.S	LOC108711414		samd4b.S	ptpra.L
		akap9								pdzd8.S	tnfaip8l3.S		tsc22d1.L	prkcz.L
		slc20a1.S								sema3c.S	fam73a.L		dapk3.L	mark2.S
		dock9.L								klhl24.S	pcsk5		elavl2.L	pex12.L
		cep170.S								kbtbd3.S	abhd14a.S		mllt1.S	cul9.L
		fitm2.L								LOC108695571	znf567		ccpg1.L	dhx30.S
		optn.S								helz.L	mtmr10.S		lrch3.S	marchf5.S
		patl2.L								tmem57.L	ssh1.L		pkp4.S	mef2d.S
		tmcc2.S								btg-x	ttbk2.S		sap130.L	bmp2.S
		cebpg.L								pias3.S	foxp1.S		traf7.S	kirrel2.L
		xpo6.L								sik2.S	cebpd.S		ykt6.L	zmynd19.L
		c1orf116.L								ttc5.L	tpbg.L		tmem185a.L	mipol1.L
		cgnl1.S								xzar2	sox13.S		enpp6.L	LOC108695585
		wasll.S								asap2.S	LOC108703778		znf395.L	slc23a2
		ubl7.L								enpp4.L	znf521.S		mllt1.L	h1foo.S
		Xelaev18023494m								camsap1.L	fignl1.L		mrpl54.S	hhla2.S
		dop1a								cdk5r2.L	amotl2.S		slc35a4.S	ptpn13.L
		kiaa0226l.S								flcn.S	hpca.S		samd4a.L	lpin1.L
		gtf2ird1.S								ccdc18.S	tmem63a.S		golgb1	arid5b.L
		armc2.L								gcnt3.S	ccdc53.L		ube2r2.L	ctnnd2
		poc5.L								atp9b.L	ep400.L		gramd1c.S	mal2.S
		dennd4b.L								ccno.S	Xelaev18008189m		zfyve16.S	lix1l.S
		cyp1a1.S								peak1.L	lhfpl2.L		pja2.L	borcs7.S
		zyg11b.L								fzd7.S	srpk2.S		gapvd1.S	tysnd1.L
		tnip2.S								dnajc13.S	LOC108698338		vars2.L	tbc1d9
		filip1.L								sertad2.S	znf521		rnf126.L	adcy4.L
		cdc6.S								camkk1.S	ins		slc35e1.L	Xelaev18001309m
		kcnj5.L								hbox10.S	acod1.S		acsl4.L	slc35c1.S
		xpo6.S								dcaf10.S	loc100494211.S		nsun7.S	pex11g.S
		pacs2.L								papd5.S	slc41a1		gdf9.S	golga1.S
		cdca7								baiap2l1.S	admp2.L		birc5.2.S	trib2.S
		znf577.S								fos.S	cyp27b1.L		rhbdd2.L	ap1s3.S
		dand5.L								ddb2.L	dennd2c.L		polr1d.2.L	sos2.S
		vps13d.L								slc35g1.L	gli2.S		cxcr4.L	lrrc58.L
		ccnb1.S								LOC108707139	MGC81187		adam10	ybx2.L
		slc20a2.L								chst13.S	sox21.L		mat2b.L	asphd2.S
		nlk.S								sox18.S	ptpru.S		camsap3.L	ptprg.L
		nkd1.S								ccdc107	socs4.L		LOC108718301	brap.L
		gpr22l.S								tpgs2.L	slc25a16.L		arhgdia.L	spire2.L
		bcar3.L								tdh.S	or52m1.L		cdc16.L	qrsl1.L
		ccndx.S								clasp1.S	ldlr.L		arf6.S	trappc10.L
		tgds.S								fryl.S	scai		taf9b.L	cuedc1.S
		arhgap11a.2.S								tmem57.S	LOC108701422		kmt2d.S	ctdnep1.S
		tdgf1.1.L								emilin2.L	gpr65.S		atxn2.L	1500009l16rik
		foxi2.L								dck.1l.L	zic1.L		camkk2.S	LOC108711538
		kiaa0586.L								srebf2.L	stx11.S		scaf8.S	LOC108718445
		cxorf21.S								stambpl1.L	btg4.S		cul2.L	usp43.L
		dand5.S								slmap.L	Xelaev18037842m		usp16.L	madd.S
		rgl2								ncan	sox17b.1.S		kpna1.L	polrmt.L
										ccdc62.L	hes7.1.L		suco.L	arhgap32.S
										exoc6.L	lhx3.S		cdc45.L	ccdc126.S
										ccdc85c.S	zic3.L		cisd1.L	plekha5
										rilp.S	hes3.S		ipo9.L	nr1i2.S
										ap4e1.S			flna	rnf32
										wnk2.L			slc1a5.L	MGC85210
										rad51d.L			dapk3.S	loxhd1.L
										slc34a2.L			fam222b.L	myo6.S
										zar2.L			kif16b	tmem55a.L
										etv6.S			cnep1r1.L	trpv2.L
										zswim4.S			fbxo34.S	ptges.S
										c6orf120.L			ddx56.S	meikin
										loc100493164.L			txn2.S	spsb3.L
										ywhag.S			cysrt1	mmaa.L
										bves.L			luzp1.S	dsel.L
										Xelaev18002673m			cab39l.L	LOC108719399
										MGC76328.S			nup35.S	vps9d1.L
										usp15.S			chfr.L	MGC115585
										epha2.L			rad17.L	ppp1r3c.2.S
										helz.S			dnajb1.L	tprn
										lipe.L			arl2bp.L	psen2.S
										r3hdm1.L			ccz1b.L	nxpe3.S
										map1lc3c.L			sytl4.S	limd2.S
										LOC108707237			trim33.S	ubr4.S
										tcaim.L			irf5.L	zfyve19.L
										LOC108705473			slc30a2.L	LOC108706275
										h1foo.L			golga4.L	def8.S
										rnf19b.S			rnf121.L	kctd3.L
										zc3h3			ppip5k2.L	pex14.S
										cracr2b.S			tmem45b.S	plekhf2.S
										pigv-like.L			marveld2.S	dpf3.L
										zc3h3.L			dnajc16.S	mfsd8.L
										wee2.L			ccdc61.L	aldh2.L
										kiaa0922.S			golph3l.L	Xelaev18004836m
										immp1l.L			csnk1e.L	kctd18.S
										cldn5.L			gclc.L	znrf2.S
										mef2d.L			cep68.L	rgmb.S
										ccnb1.L			qrich1.2.S	atf2
										zswim4.L			stim2	kirrel2.S
										foxh1.2.L			gltp.S	LOC108703132
										LOC108708627			hic2.S	LOC108719459
										colgalt2			eed.L	fam189a1.S
										ccna1.L			tmed9.S	rhbdl1.L
										MGC68639			larp4.S	drd4.L
										Xelaev18011386m			exoc2.L	pdzd8.L
										pou3f1.L			cpsf4.S	fbxo31.S
													luzp1.L	arhgap33.S
													zhx3.S	arhgap40.S
													btrc.L	pou5f3.2.S
													nol12.S	cdkl5.L
													xtm4	fam96a.L
													yod1.L	eif4g3
													dennd4a.L	rcan3.L
													ptcd2.L	LOC108709286
													kiaa0196.S	tbx22.S
													n4bp1.S	adamts6.S
													limch1.L	ccdc50
													hnrnpll.S	adamtsl5.L
													tmem115.S	pdzrn3.L
													chd8.S	LOC108707871
													efr3a.L	shank2.L
													fkbp4.L	LOC108697848
													znf577.L	nfatc2.S
													trmt13.L	loc100216027.L
													emsy.S	LOC100485199-like.S
													idh3a.S	nup98.L
													ctnnbip1.L	LOC108711723
													tbc1d12.S	tcta.S
													ppp4r3b.L	hpca.L
													id2.S	gli1.S
													lrrc42.L	ptpn23.L
													ifi30.S	wee2.S
													snap91.S	Xelaev18046538m
													got2.L	Xelaev18023726m
													prkar2a.L	aco2.S
													oaf.S	runx1.L
													cc2d2a.L	LOC108696547
													h6pd.S	pde4d-like.L
													sdf2l1.L	hs3st1
													rexo1.L	tnrc6c.L
													pld2.L	spsb3.S
													ints2.S	mpv17l2.L
													lnx2	LOC108719562
													glmn.L	LOC108697295
													bsg.S	ppm1h.L
													pxn.S	wnt7a
													rhog-like.1.S	rnf152.L
													keap1.S	LOC108704294
													LOC108700229	gpr37l1
													pikfyve.L	hlf.S
													abi1.L	Xelaev18011648m
													clec16a.S	akip1
													rap1a.L	ipp.L
													st3gal3.S	LOC100489074.L
													ubap1.S	nrap.L
													cdkn2aip.L	LOC108697873
													rnf126.S	tph1.S
													bix2.L	rragd
													grk5.S	loc733728.L
													ubxn2a.L	eomes.L
													naa30.L	wdsub1.L
													rasal2.S	LOC108702643
													bri3bp.S	btn3a2
													atg16l1.L	myo15a
													wapl.S	angptl4.L
													sh3glb1.S	tmem116.L
													plekhf2.L	eomes.S
													c11orf95.L	LOC108718863
													slc25a40.L	pde1c
													tmem178b	dsg4.L
													ipo13.L	ugt3a2.L
													lmbr1l.L
													rhbdd3.L
													otx2.L
													LOC108695562
													bmi1.L
													otx2.S
													tm9sf1.S
													git2
													tmem62.S
													foxn2.S
													ranbp3.S
													c11orf57.S
													ppfia1.L
													yae1d1.L
													kpnb1.L
													pus3.L
													wdr61.S
													stk24.S
													LOC108711140
													slitrk5.S
													rcl1.S
													mrps17.L
													rabgef1.S
													ppm1d
													pnrc2.L
													gpt2.S
													smarcad1.S
													celsr2.L
													larp4.L
													asap2.L
													gcc1.L
													dolpp1
													cul2.S
													ate1.L
													fam122b.L
													kif1bp.S
													epb41l4a.S
													LOC108695556
													nelfa.L
													nipal4.S
													p2rx4.L
													fam43a.S
													lysmd2.L
													arl9.L
													efna5.S
													btbd8.L
													ehbp1.L
													hace1.L
													mtfr1l.L
													lpgat1.S
													LOC108707216
													sys1.S
													dpp9.L
													necap2
													nf2.L
													frmd4b.L
													mcrip1.S
													ric1.L
													gpsm2.S
													tom1l2.L
													tmtc3.L
													tp53bp2.L
													ccdc117
													smim12.L
													drosha.S
													arhgap21.L
													sos2.L
													pus1.S
													ado.L
													timm23.L
													rpgr.S
													sipa1l1.S
													camk2n1
													napg.L
													smc6.L
													tspan3.S
													cant1.L
													lrrk2.L
													hsph1.S
													gab2.S
													alkbh5.S
													timm8a.L
													tbc1d14
													c10orf35.L
													ccser2.L
													ccdc141.L
													spire2.S
													cct4.L
													gpm6b.L
													tbc1d10a.S
													irs4.S
													mark4.L
													slc38a9
													galnt2.S
													Xelaev18041216m
													sgip1.L
													bmp4.L
													Xelaev18035105m
													cpt2.S
													alg12.L
													pik3r4.S
													gtpbp1.S
													src.S
													smarca5
													slc4a11.L
													sulf1.L
													golga3.S
													rnf5.L
													rab14.L
													mier2.S
													timm13.L
													stx16.S
													stambp.S
													gid4.S
													dr1.L
													chd3
													vps4a.L
													apba1.L
													fcho2.L
													hip1r.S
													foxa4.L
													stk17a.L
													mpp6.S
													inpp5a.1.L
													dpagt1.L
													spty2d1.L
													cep295.S
													stx2.L
													armc7.L
													emc8.S
													ccdc149.L
													etnk1.S
													arg1.L
													Xetrov90004873m.L
													nuak2.L
													st14.S
													hpcal1.L
													e2f4.S
													MGC98819
													vegt.L
													erbb2.L
													kiaa1328.L
													rassf3.L
													slc35f5.L
													timm50.L
													xpo5.S
													ssb.L
													ccna2.S
													dph6.L
													hebp2.S
													ccdc64.L
													cers2.S
													stim2.S
													oxld1.S
													tsc2.S
													map3k10.L
													map4k5.S
													nckipsd.L
													atp8b4.S
													raver1.S
													rmdn2.S
													cep78.L
													ttc5.S
													spry2.S
													fcho2.S
													lrch2.L
													rbm27.L
													cldnd1.L
													sin3a.S
													fbxl17.L
													rnf217.L
													fut10.L
													LOC108715416
													svil
													muc3a
													uxs1.L
													lysmd1.S
													sgms1.L
													sgsm3.L
													rock1.L
													tert.L
													uck2
													stxbp5.L
													rmnd5a.L
													taok3.S
													kiaa1456.L
													bri3bp.L
													sfxn4.L
													fchsd1.S
													elavl2.S
													ift88.S
													nipa1.L
													foxa4.S
													gtf3c1.L
													corin.L
													snrnp35.L
													mtbp.S
													nav3.L
													smurf1.L
													fam122a.S
													rasgrp1.L
													sema4g.S
													afap1l1.L
													cpd.S
													LOC108704685
													cdc20.L
													hlx
													cnksr1.L
													zbtb24.L
													dcaf5.L
													ppp2r3a.S
													bdp1.S
													ier2.S
													kiaa1671
													cdc42ep4
													ssbp2.L
													dvl3.L
													fam234b.L
													glmp.S
													cptp.L
													calml4.S
													habp4.L
													chrna4.S
													trmt44.L
													dr1.S
													brox.L
													katnb1.S
													atl3.L
													rab8b.L
													zfyve9.L
													slc30a6.S
													enc1.L
													creld1.L
													vps18.S
													arl10b.L
													exoc8.S
													mfsd4b.S
													mcm3.L
													arsa.1.S
													MGC84007
													sipa1l3.L
													tmem2.L
													hmgxb4.S
													tprn.L
													kiaa1671.S
													rcor1.L
													pik3r4.L
													acsl4.S
													rb1cc1.L
													epb41l4b.S
													samd4a.S
													hspa5.S
													chpt1.L
													myo5b.S
													negr1.L
													LOC108702593
													supv3l1
													zbtb37.S
													pip4p1.S
													tbc1d10a.L
													mdm4.S
													naa15.L
													acvr1b.L
													arhgap29.L
													ankib1.S
													tmem60.L
													mex3d.L
													gdpd5.L
													hyls1.S
													ankrd13a.S
													Xelaev18038858m
													plxnb1.L
													slc9a1.S
													zufsp.S
													unc45a.L
													scamp1.S
													tmem170a.S
													slc39a8.L
													ppp3cc.L
													tmem192.L
													wwp1.S
													clcc1.S
													usp34.L
													cse1l.S
													manbal.S
													tbc1d30.L
													rnf5.S
													pitpnc1l.L
													ccdc9.L
													mex3a.L
													rapgef1.L
													otud4.L
													hhip.L
													trappc12.L
													thumpd3.L
													abhd17a.S
													wnt5b.L
													tmem251.L
													pim3.L
													rhov.L
													dlg1
													prrg4.S
													mdh2.L
													lpar1.S
													fgd4.L
													cox5b.2.L
													cdk5.L
													flrt3.L
													pik3c2a.S
													rbm24.S
													sox18.L
													spry4.L
													tmem181.L
													pafah1b2.S
													atg101.L
													spry1.L
													gbf1.S
													pwwp2b.L
													slc29a3.S
													LOC108700013
													bbs2.S
													ralgps2.S
													rab9a.L
													fbxo33.L
													stard5.L
													uaca.L
													oat.1.L
													pgpep1
													sirt6.S
													lpgat1.L
													tmem5.S
													dolpp1.L
													tcp1.S
													impad1.L
													commd3.S
													fh
													LOC108713852
													cask.S
													snx30.S
													ptpn21.L
													mgat2.S
													xbp1.L
													nptn.L
													LOC108718648
													tmem131l.L
													fbxl18.L
													ctf2
													commd2.L
													tjp3.S
													mgat4b.S
													slc41a2.L
													LOC108717918
													cidec.S
													lbh.L
													flvcr1.S
													lrp2.L
													mlxipl.L
													LOC100489887.L
													cdc27.S
													lss.S
													sema4b.S
													itpkc.S
													tbl1x.L
													popdc3.S
													b4galt5.L
													LOC108718109
													eif4enif1.L
													bdp1.L
													kif27
													adarb1.L
													hras.L
													gdf1.L
													ccdc71l.L
													bcdin3d.L
													mcl1.S
													apitd1.L
													cenpn.L
													fam208b.S
													fbxo10.L
													fhdc1
													ptk2.L
													MGC76328.L
													fam84b.S
													cse1l.L
													hspa5
													ide.S
													MGC115273
													oat.1.S
													LOC100492708
													ripor3.S
													rnmtl1.L
													cyp4b1
													rhov.S
													sbk1l.S
													Xelaev18000237m
													col24a1.L
													dmxl2.S
													gpr160.L
													dtx2.L
													rab21.S
													snai1.S
													shroom2
													gas6.L
													smad1.L
													slc2a13.L
													Xelaev18031388m
													pcyox1l.L
													chst13.L
													parn.L
													tollip.S
													mrps16.L
													nufip2.S
													pgap1.L
													bix1.1.L
													golph3l.S
													c1orf52.L
													rfxap.S
													cnksr2.L
													gga1.L
													aebp2.S
													LOC108708787
													wdr47.S
													arhgap27.L
													rasd1.L
													eif2ak3.S
													nuak1
													lrrc56.L
													cpeb3.L
													map3k4.S
													galnt6.1.S
													dusp5.L
													sec24b.S
													fgf8.S
													phkg2.L
													lysmd4.L
													lrmp.L
													dusp6.S
													arap3
													ttbk2.L
													ssx2ip.L
													tmem45b.L
													parn.S
													nanp.L
													fbxo45.L
													slc9a7
													ern2.L
													fbxl15.L
													slc33a1.L
													rabgap1l.L
													znrf3.L
													bmp7.2.L
													bix1.3.L
													loc100495271.S
													apcdd1.S
													ankib1.L
													mkl2.L
													atad3a.S
													zdhhc9
													rbm38.L
													tbc1d1.S
													MGC115216
													usp16.S
													rel.S
													antxr2.S
													crem.L
													tnfrsf1a.S
													LOC108704394
													clic1.S
													tmem18.S
													zfyve9.S
													c1galt1c1.S
													tmcc1.S
													exd1.L
													cxcl11.L
													nufip2.L
													dcaf12.L
													rabgap1l.S
													ier2.L
													pik3r2.S
													dis3l2.L
													kiaa1841.L
													fgd6.S
													macc1.L
													saysd1.L
													efhd1.L
													plk3.S
													nr2f1.L
													sowahb.L
													tdgf1.3.L
													lonrf3.S
													baz1a.S
													amfr.S
													plekhg5.L
													irgq.L
													arhgef28.S
													bix1.2.L
													psme3.S
													hhipl1.L
													kbtbd8.S
													zfand2a.L
													nipa2.S
													not.L
													ptpn14.L
													ccny
													rasl11b.S
													rab11fip3.S
													plekhg3.L
													Xelaev18008577m
													Xelaev18019163m
													cdc14b.L
													adcyap1.S
													alg11.L
													pigg.S
													dnajb5.L
													sgcb.S
													LOC108704627
													smarcc2.S
													ston2.S
													grk6.S
													lpar5.S
													pot1.L
													gm29884
													LOC108717350
													erbb4.L
													shox2
													LOC108704130
													nodal2.L
													Xelaev18001619m
													gadd45g.L
													cep76.L
													hlcs.L
													elk4.S
													olig4.L
													etv3l.S
													cep112
													sel1l.S
													plxnb3.S
													wdr90.L
													pou2f1.L
													brinp3
													aco2.L
													Xelaev18001443m
													tnfaip8.S
													rdh9.L
													dmxl1.L
													Xelaev18001896m
													Xetrov90029963m.L
													pcdh8.2.S
													gpr65.L
													prdm14.L
													btg2.S
													akap10.L
													LOC108703769
													tank.S
													rnf219.L
													picalm.1.S
													lrp8.L
													Xelaev18034023m
													spry2.L
													tspan1.L
													slc44a4.L
													npy2r-like.1.L
													tank.L
													parpbp.S
													Xelaev18033527m
													Xelaev18001472m
													lzts1.S
													scn2b.L
													LOC100490741.L
													dnajb14.S
													hes7.2.L
													LOC108698354
													nuak2.S
													trpm8b.L
													hes7.2.S
													pitx3.L
													LOC100491090.L
													kitlg.L
													dgkh
													cass4.L
													zbtb18.S
													lhx5.S
													ednra.S
													cdk5r2.S
													rem1.L
													styx.L
													lrp8.S
													homeobox100496651-provi
													mos.L
													stx19.S
													zfp36
													pip5k1b.L
													loc108648340.L
													nfkb1.S
													osr1.S
													tmem255a.L
													rasl11b.L
													shh.S
													tvp23a.S
													grhl1.S
													mob3c.S
													Xelaev18000337m
													pex13
													LOC108700571
													hsp70.L
													foxr1.L
													mthfr.L
													MGC85058
													ntmt1.S
													gsc.S
													st6gal1.L
													cux2.L
													rgs4.S
													pdgfa.L
													bmp7.2.S
													Xelaev18032855m
													mb21d2.L
													LOC108705533
													lhx8.S
													kank1.S
													msantd3.L
													hoxc12.L
													ptgs2.L
													Xelaev18010890m
													Xelaev18000483m
													arl15.S
													fgd4.S
													flrt3.S
													lefty.L
													grhl1.L
													sox3.L
													nodal1.S
													sel1l3.L
													larp6-like.1.L
													gsc.L
													errfi1.S
													lrriq3.S
													vegt.S
													itgb8.L
													arhgap20
													gdf3.S
													cacnb1.S
													hprt1.L
													wnt5b.S
													dusp1.S
													usp53.L
													ston2.L
													c14orf166.S
													mfsd6.S
													vps37a.S
													ago1.L
													coq10b.L
													zdhhc12.L
													LOC108714033
													amigo2
													hoxc9.L
													wnt16.L
													lcorl.S
													xhoxc8
													chst8.L
													egr4.S
													stard13.L
													vgll3.L
													trarg1.L
													ptgs2.S
													stx19.L
													adra2a.L
													trim2.L
													jun.S
													fut1.S
													tbp.L
													junb.S
													wnt8a.S
													fgf20.S
													birc7.S
													paqr8.L
													Xelaev18038459m
													nptx2.S
													tfap2c.S
													ccdc125.S
													onecut1.2.S
													mitd1.L
													thsd7a.S
													shank2.S
													dguok.L
													mix1.L
													phospho1.S
													foxj1.L
													ache.S
													tat.S
													stard13.S
													yrdc
													LOC108718425
													fam126a.S
													pou3f1.S
													LOC108699131
													nlrc3
													chrm4.L
													LOC108704510
													grhl3.L
													nodal.S
													dhx58.L
													nodal1.L
													mafa.S
													socs1.S
													onecut2.S
													ltbr
													ppp1r16b.S
													menf.1.L
													lefty.S
													grhl3.S
													LOC108712674
													abcb1
													btg5.L
													LOC108699863
													cebpb.S
													pygo1.L
													LOC108705749
													plekhg2.S
													egr4.L
													socs1
													Xelaev18009570m
													loc733556.S
													foxj1.S
													il18.L
													klf2.L
													slc35a4.L
													dmrt2.L
													eva1a.L
													f3.L
													MGC83539
													grm1.S
													nodal3.1.L
													zfp36l2.1.S
													nr4a1.L
													cnksr2
													fosl1.S
													olig3.S
													rassf9.S
													ptger4.L
													hs3st1.L
													fgf3.S
													nodal3.2.L
													LOC108711579
													nodal.L
													map3k13.L
													egr2.L
													fos.L
													egr1.L
													fosl1.L
													cxcl8.S

## Sheet: St12-13_Increase
List of Genes for all Overlapping Temporal DESeq Groups, corresponding with supplemental figure 3
All_Lineages	Epi-Meso-Neur	Epi-Meso-Endo	Epi-Neur-Endo	Meso-Neur-Endo	Epi-Neur	Epi-Meso	Epi-Endo	Neur-Meso	Neur-Endo	Meso-Endo	Epi	Neur	Endo	Meso
sp7.L	fucolectin.S	b3gnt3.L	n/a	nr6a1.L	agr2.L	lrrc31	gnaz.L	lrat.L	galnt16.L	pcdh8l.L	loc100489834.L	eya1.L	Xelaev18042133m	hoxc4
rab3d.L	c6orf132	ppl.L		ncam1.L	arhgef3.2.L	spata18-like.L	tril.S	gli3.S	ventx1.2.L	fat2.S	lrrc18.L	lhx2.S	kcne1.L	wnt10a.L
gnb3.S	syt8.L	ptprd.L		elf1.S	wfdc2.L	hgf.S	tbata.L	nxpe2.L	Xelaev18017809m	fign	kiaa1549l.S	ventx2.2.L	LOC108705583	LOC108708640
	znf185.L	axl.L		trpv5.L		LOC100127337	Xelaev18000343m	krt12.S	celf3.L	flt3lg.S	LOC100488736-like.1.1	ventx2.1.L	spam1.L	hoxa5.S
	stard10.S	dgkk.L				ttc24.L	LOC108705531	trim29.S	crabp2.L	cyp1c1.L	stmnd1.S	mapk6.L	hrg.L	sparc.L
	sgsm3.S	tril.L				scn5a	slco2b1.S	ventx2.1.S	mmel1.L	ptpn20	bc051019	nhs	ppp1r1b.S	hoxc4.L
	nkain4.S	slc38a3.S				MGC75872.L	ccdc171		acsbg2.S	ppl.S	ai661453	adam33.L	LOC108700106	Xelaev18010427m
	pvrl1-like.2.S	vill.L				tekt2.S	Xelaev18031009m		ror2.S	plod2.L	fam81b.S	pax3.L	Xetrov90020448m.S	hoxa7.S
	scnn1a.S	sytl2				slc3a2	ccn2		shroom3	LOC108700048	LOC101733219.S	id3.L	igf2.L	hoxc6.L
		atp13a4.L				LOC108718065	map9.L		gata2.L	frmpd2b	LOC100488736-like.2.1	ulk1.S	nt5e.L	xhoxc8
		syt16.L				sytl1.L	alms1.L		id3.S	LOC108715566	LOC108711774	arhgap39	fam198a.S	hoxc6.S
		tanc2.L				tuba1cl.2.L	kndc1.L		arhgap36.L	nhs.L	tmc5.L		LOC108698406	meox2.S
		syt1				rsph1.L	b3gnt7.S		tmem138.L	sod3.L	LOC108696147		olig2.S	hoxc8.S
		myo10.S				wdr66.L	cyth2.L		ccng1.S	fgl2	kiaa1324.L		eva1a.S	plod2.S
		niban2				slc16a9.S	chn1.L		rreb1.S	loc548390.S	hmx3.L		ugt1a1.L	hoxd4.L
		clock.S				slc3a2.L	farp2.L			epha3	ikzf2.S		cfi.S	pcdh8l.S
		glipr2.S				galnt5.L	LOC108714578			robo1.L	colca2.L		tmem119.S	hoxa10.S
		adcy9.L				lpar3.S	tctn2.L			mmel1.S	ccdc17.L		cfi.L	atp13a-like.S
		fbxw9.S				rapgef3	MGC154492			fign.L	LOC108708418		spib.L	hoxc5.L
		fzd10.L				cat1.L	abcb5			gli2.L	pou1f1.L		Xetrov90020447m.S	slc9a5.L
		itpkb				dse.S	amotl2.S			tmem125.L	epn3.S		myadml2	tuba1cl.1.L
		adam9				galnt12.L	samd12			myo3b.L	sstr5.S		Xelaev18002155m	Xelaev18000621m
		gjb1.L				LOC108718814	poc1a.L			tenm4	casz1.L		LOC108707188	hoxa7.L
		sh3rf1.L				plxna2.L	LOC108705534			slc41a1	ppp1r32.L		hephl1.L	hoxb8
		LOC108709394				sptlc3.S	ptprn.S			Xelaev18006569m	neurl1.L		klb.L	LOC108701747
		atp11c.L				LOC108703547	ankdd1b.L			cacna1b.S	loc100127564.L		zc3h12c.L	hoxa10.L
		rab27a.S				pm20d1.L	xepsin.L			slc2a2.S	capsl.S		loc100490316.L	hoxd4
		ribc1				frk.L	fam83f.L			hes8.S	cdhr4.L		dlk2.S	hoxc9.S
		samd15.L				zc3h12a.L	smpd1.L			bmp3.L	prr29.L		celf3.S	spns2.S
		foxn4.S				ly6e	cfap45.L			foxf1.S	t.L		Xelaev18005504m	actc1.S
		st3gal4.L				slc35b4.L	MGC154819			Xelaev18001114m	myo15b.L		MGC82982	hoxa9.S
		kiaa1217.S				tcaf1.L	trpv6.L			ptprd.S	tacr1.S		pak6.L	dbndd1.L
		Xelaev18037313m				cdx2.S	ndufa8.S			LOC108714950	LOC108710713		Xelaev18029531m	hoxb4.S
		fzd10.S				kcnj2.L	tmem200c.S			LOC108709417	morn3.S		cyp11a1.S	cmahp.L
		nav1.L				scel.L	sorcs1.S			lef1	efhc2.S		Xelaev18041713m	foxj1.2.S
		meis3.L				pcnt.L	MGC81163			mamld1.L	LOC108708075		lrit1.S	hoxa9.L
		gpd1.L				loc100496187.L	leprotl1.S			fmnl2	lrrc73.S		gfi1.L	cyp26c1.S
		ephb2.S				gcm1.S	ndfip2.S			cebpa.S	pip5k1b.S		kcng3-like.1.S	otog.L
		sgms1.L				myo5c.L	amotl2.L			klf3.L	msrb2.L		nt5e.S	hoxb5.S
		ppp1r3c.1.L				sytl5.L	iqsec2.L			LOC108712697	cracr2a.L		LOC108713294	crnn
		dspp				LOC108707893	tfcp2l1.S			spata5l1.L	ccdc78.S		LOC108696372	hoxb7.S
		gby.L				tlrs5	zbtb46.S			phka2-like.S	gpr156.S		pdzd3.L	mmp11.L
		hk2.S				liph.L	1700030j22rik			dst	cfap70.L		LOC108719843	hoxb1.S
		rab15.L				capn8.2.L	usp21			tuft1.S	akna.S		Xelaev18026948m	hoxa6
		mmp11.S				krt222.S	vangl1.S			foxf1.L	loxl2.L		col13a1.S	loc100158267.L
		atf7ip.S				tsga10.L	flii.L			tacr1	ttll10.L		loc108705532.L	hoxc9.L
		isl1.L				kitlg	g67.L			sspo	ccdc64b.L		ppp1r15a.S	LOC108719498
		tab2.L				b4galt4.L	fry.L			caskin2.L	wdr88.L		wnt11.L	LOC108697577
		slc8b1.L				anxa9.L	rbm47.L			lamb1.L	tekt1.S		ventx3.2.L	klf4.S
		rnf149.S				loc100492168.L	c8g.S			LOC108701190	c2orf70.S		cpxm1.L	Xelaev18032572m
		mcm5.S				gbx2.1.L	elmsan1.S			LOC108713029	Xelaev18004129m		Xelaev18045499m	wnt5a.S
		tanc2				tm2d3.L	slc50a1.L			slc45a3.S	LOC108699458		LOC108700044	ccdc136
		arid3a				eps8l2.L	clcnkb			crabp2.S	ppp1r36.L		rin2.S	arhgef37.S
		sp7.S				parm1	sik1.S			val.L	loc100145045.L		fgf10.L	tgfb1.L
		nr6a1.S				stx3.L	pidd1.L			itga5.S	klhdc9.L		LOC108719071	capn9.S
		fblim1.S				arpc1a	Xelaev18000128m			notum.S	dcdc2b.L		phka2-like.L	hoxb3.S
		LOC108704569				dlx2.L	hipk1.S			LOC108710818	msrb2.S		Xelaev18004102m	Xelaev18000499m
		arl6ip1.S				lrrc36.L	mpzl1.S			aim1l.L	efhb.L		dlc.L	pmp22.L
		cpt1a.L				fut2.L	tll1-like.1.L			agap1.L	spag6.L		ccn1l.S	thbs2.L
		snx33.L				krt12.L	LOC108719340			Xelaev18023478m	txn.L		klf8	MGC53587
		map4k3.L				tmem181.L	MGC84460			vwf	lrrc74a.L		nkx2-1	fign.S
		mid1ip1.S				mboat1.S	degs1.L			nlrx1.L	ttll13p.L		b3galt1.L	kif26a.L
		capn8.1.S				tnk2.S	aldh4a1.L			rcor2	vstm5.L		LOC108700108	kdelr3.S
		slc9a3r2.S				adgrf1.L	ubtd1.S			sdhb.S	crym.S		emilin1.L	kiaa1217.L
		tbx3.L				hid1.L	kdm6b.S			stx3	LOC108705769		fetub.L	sp5.S
		caskin2.S				rfk.S	hao2.L			lrpprc.S	fam166b.S		ppargc1b.S	basp1.S
		bace2.L				plxna2.S	accs.L			nuak1.L	Xetrov90005895m.L		svop.L	itln1.L
		fam83h.S				ahnak	net1.S			lhfpl2.S	slc41a3.S		LOC108700001	ndnfl1.1.L
		kcnj15.L				zfpm1.S				sun1.S	hhex.L		LOC108709924	hoxb9.S
		depdc7.S				LOC100486385.L				slc45a3.L	dnhd1		tgfbi.L	gbx2.2.L
		mdk.S				syt13				acvr2b.L	myzap		ripply2.L	wnt5a.L
		cebpd.L				alg11.L				hs6st1.S	loc100494072.S		slco1b3.S	tmem184a.L
		tll1.S				vsig8.L				slc30a8.L	cdkl4		abtb2.S	ugt8.S
		esrp1.S				pcdh10.L				jade1.L	ccdc81.L		klb.S	arhgef26.L
		rhof.L				slco4c1.L				bmper.L	LOC108701701		Xelaev18000356m	loc100489456.L
		ptbp3.L				sept8.S				aox2	htr1a.L		c6.2.L	myf5.L
		rxra.S				sgsm3.L				casz1.S	ccdc13.L		Xelaev18011469m	ndnf.S
		endod1.L				rab3d.S				uhrf2.S	slc35e4-like.L		LOC108709534	tuba1a
		foxn4.L				inf2				fam222a.S	ak9		Xelaev18036101m	fam155b
		post5.S				plekha6.S				grhl2.L	fbxw10.L		LOC108719358	polrmt
		krt8.S				gdpd1.L				ppp1r1a.S	lrrc34.L		prrx2.L	tecta.1.L
		ppp1r18				b4galnt3.S				Xelaev18035430m	akna.L		fcho1.L	sostdc1-b
		elmsan1.L				igsf9b.L				nav2.S	c11orf53.L		gdf6.S	LOC108704135
		tfcp2.L				xk81a1.L				hoxd1.L	hba3.L		ripply3.L	nr1d1.L
		ncoa2.L				sidt1.L				adipor1.L	ribc1.S		rgs20.S	itpr3
		galnt7.L				reps2.L				anxa2.S	Xelaev18022505m		vepp1.L	tox.L
		ccm2.S				robo2				prex1.L	efcab5.S		slc10a1.L	tp63.S
		dusp8.S				krt18.3.S				cmip.S	ggt5.S		mgat3.L	atp12a.L
		chpf.L				vill.S				h2afy2.L	lhb.S		syt9.L	mcidas
		stim1.S				eps8l1.L				dab2ip-like.L	LOC108717174		blvra.L	mef2c.S
		pknox1.S				nipal2.S				sgpp1.L	tmem67		msx2.S	loc100145533.S
		hs3st3a1.L				furin.L				aldh1l1.L	rem1.L		Xelaev18004391m	slc35a3.1.L
		apeh.L				cfap100.L				insr.S	Xelaev18041179m		hipk2.S	hes8.L
		pik3r1.S				hexd				tusc2.S	elmo3.L		hnf1b.L	hoxa11.L
		ngfr.S				slc25a22.L				fndc3a.2.L	LOC108699362		LOC100135146.S	wdr86.L
		slc16a6.L				bcat1.L				znf644.S	LOC108709187		chst6.L	Xelaev18003892m
		slc16a6.S				rab25.L				lrp4.S	ccdc33.L		bco1.L	krt80.S
		sun1.L				ptk2b.S				kazn.S	kcnrg.L		asic2	crb2.S
		tbx3.S				sytl2.L				Xelaev18022564m	bok.L		abtb2.L	fkbp9.S
		bmp7.1.L				Xelaev18028823m				kiaa1549.S	catip.L		eng	sfrp1.L
		lig4.L				atp2a3.L				eif4g1.L	Xelaev18002192m		ndrg1.S	tnfaip8l2.S
		slc35f5.L				rbbp8nl.S				ets1.S	btbd11.S		adamts18.S	cald1
		slc44a3.L				ndel1.S				rassf10.L	fam101b.L		sept5.L	scn3b.L
		rbm23.L				trappc4.S				emp2.L	bix1.1.L		wnt5b.L	tnfrsf19.L
		gpr160.L				tmem87b.L				tbx2.L	ca2.L		s1pr3.S	gsg1.S
		entpd4.S				tacc2.L				cfh.L	ccdc160.L		gli2.S	elf3.S
		det1.L				mfsd6.S				rdd4.L	Xelaev18009543m		znf750.S	Xelaev18002015m
		prpf39				stoml1.L				atp8b2-like.L	fgr.L		frrs1.S	mgc147226.S
		nr2f6				plekha8.L				kit.L	pdp2.S		exoc3l2.L	Xelaev18042791m
		tnrc6b.L				sgk3.S				comt.2.S	rapgef5.L		cemip.S	capn8-like.L.L
		tmem238				abcg2.L				znf229.L	tex52		eya2	tshz1.L
		tdg.S				hspa5				agrn	tmem178a.S		slit2.S	axin2.S
		tnrc6b.S				ttc39a.L				zfc3h1	capsl.L		c2cd4c	lmln
		pcdh1.L				cog1.S				greb1l	prox1.S		ttll7.S	mgat4c
		MGC82989				slc30a10.L				Xelaev18043419m	ccdc146.L		ca8.S	aim1.S
		itpr2				MGC52899				sntb2.L	cfap52.S		sp4.S	hkdc1.S
		tmco3.L				foxj1.2.L				tmem45a.L	plk4.S		dbx1.L	vgll1.L
		nfe2l1.L				sgk2.L				slc30a7.L	dnah12.L		rbm24.L	tmem173.S
		ncor1.L				c1galt1c1.L				Xelaev18039917m	armc4.S		cdx4.S	casd1.L
		rps3a.L				txndc11.L				ahnak.L	LOC108705675		Xelaev18003555m	LOC100145533.L
		pknox1.L				myo1e				nid2.S	ttll7.L		Xelaev18003004m	LOC108719743
		fkbp9.L				nxpe3				zbtb14.L	lekr1.L		sema3f-like.1.L	zfpl1.S
		ghitm.S				gcnt4				Xetrov90014299m.L	eml6		Xelaev18025448m	cdx1.L
		rpl19.L				zdhhc9.L				bend3.S	noxred1.L		ntrk1.S	mrpl46.S
		rtcb.L				trabd.S				sh2b1.L	LOC398451		slc17a7.S	stmnd1.L
		march6.L				kmt2c.L				cry1.L	c9orf9.L		adamtsl4.L	gck.L
		wwc2.S				gmppa.L				golm1.L	ttc12.L		wnt8b.S	flt1.L
		ncor1.S				gnpnat1.L				prpsap1.S	slit1		egflam.S	fcgbp
						fam83e.S				usp31.S	cux2.L		sstr2	cish.L
						nhsl1				cd99l2.S	saxo1		ccl19.S	wfikkn1.L
						slc35c2.S				zbed1.L	LOC108704212		crtap.S	ggact.L
						chsy1.S				zmynd8.L	spag17.L		Xelaev18003553m	galnt5.S
						lrmp.L				zfyve28-like.2.S	slc26a4l.L		scube1.S	agr2.S
						bnip1.L				atf7.S	slc10a4.S		wnt5b.S	LOC108699846
						mkl1.L				spin1.S	slc19a3.L		htr1d.S	robo3.S
						nefm.L				znf516.L	tppp3.L		ror1.L	tnc
						sowaha.S				phf21b	mdh1b.L		mzt2b.S	tuba1a.S
						sytl5.S				tab2.S	rdh11.S		LOC108700038	anos1.L
						plcb4.S				gmps.L	plcb2.L		igf2.S	Xelaev18029603m
						sytl2.S				uspl1-like.L	zfpm1		fam181b.L	pcdh18.L
						csta				actn1.L	LOC108711267		fam20c.L	LOC108705956
						dedd2.S				eral1.L	irx5.S		slc47a2.S	hes3.3.L
						crybg3.S				ventx1.1.S	ttll13p.S		ventx3.2.S	cyr61.L
						chpf.S				fam53a.L	dmrt2.L		il12rb2	znf534.L
						rab19.L				LOC108713946	adra2c.L		MGC154351	xpo4.S
						aadacl4.S				rest.L	hoxa1.S		cacnb2.L	LOC108698731
						galnt4.L				cdc7.L	gramd2b		gprc5b.S	kirrel1
						capn13.L				gatm.S	gas6.S		pmp22.S	flrt2.S
						phlda2				plxnb2.S	ankrd9.L		insm1.L	lypd6b.L
						prr5.L				LOC108718667	tcte1.L		Xelaev18035109m	atp13a-like.L
						fa2h.L				LOC108703993	ccdc67.L		stk17a	casd1.S
						golgb1.L				ifrd1.S	tekt3.S		kalrn.L	nceh1.L
						Xelaev18028825m				nr1h2.L	LOC108708387		Xelaev18000408m	kit.S
						arhgef28.S				fryl.L	jhy		foxp2.S	prtg.L
						MGC83169				mboat1.L	umodl1		itga4.S	tmprss9.L
						amot.S				ndc1.S	LOC108700672		masp1/3a	adamts10.L
						per2.L				rab12.S	tmprss2.2.L		tnfaip3.S	pou2f3.L
						nkd1.L				zbtb11.L	iqub.L		kbtbd11.L	pheta1
						rnf43.S				cdk17.L	ccdc180		Xelaev18005230m	krt.L
						capn1.L				kmt2e.L	frmd6.L		clcn1	dipk1c.S
						bsn.S				cblb.L	lrit1		heca.L	ephb1.S
						ehd4.L				krt5.7.L	dopey1.S		capn13.S	LOC108701741
						sh3d21.S				dll1.L	pip5kl1.S		LOC108707266	st3gal2.2.S
						xk.L				cdh26.S	rrm2b.S		ldlrad3.S	Xelaev18000380m
						vsig10.L				zfc3h1.L	agbl2.L		eps8l3.S	Xelaev18003636m
						lgalsl.S				prdm2.S	wdr27.L		pax5	krt8.2.S
						nrbp2.L				usp12.S	rhobtb2.L		id2.L	slc18a1.S
						slc35a3.2.S				ticrr.S	ttll9		slc7a7.S	lrrc40.L
						nfe2l3.L				LOC108708226	ccdc177		LOC108703573	post9p.L
						csrnp2.L				slc25a28	tex47		c3orf70.L	ank3
						cep135.L				ndufv2.L	loc100497395.S		gdap1l1.L	znf827.S
						degs3.S				lmo4.2.L	c20orf96		nrl.S	LOC108708154
						galnt6				trim71	rab36.L		c2.L	Xelaev18000619m
						nfe2l3.S				pcdh1.S	pparg.S		axin2	clptm1l.S
						meioc				qser1.S	sptlc3.L		LOC100135146.L	p2ry11.L
						ccdc14				enc1.L	tmlhe.S		ror1.S	taco1.L
						mfsd6l.L				ankrd17	cerkl.L		nfatc1.S	mpzl2.L
						pik3ca.S				Xelaev18006061m	LOC108705424		Xetrov90004347m.L	shb.L
						rnf145l.L				clasrp.L	mycbpap.L		insm1.S	mcidas.L
						cib1.S				disp1.S	Xelaev18022620m		avpr1a.S	klf3.S
						pgm3.L				tmem259.S	prr7.L		cga.L	cd44.S
						vtcn1.L				gnb3.L	LOC108702877		drgx.L	rab12
						map3k10.L				nxpe4	c2orf50.L		Xelaev18016122m	LOC108716728
						fam3d.S				actr5.S	glb1l2.S		fzd6.L	baz2b.S
						sipa1l3.L				c1orf84.L	ccdc83.L		lrfn5.L	LOC108702204
						fam3a.L				kmt2a	bix1.2.L		vwa2.L	acpp
						mfhas1				krt8.L	tp73		c3.L	mars2.L
						styk1.S				mtf1.L	tekt4.S		b4galt4.S	LOC108708140
						specc1l				fam3b.L	dennd1b.L		ptprc.L	ttc22.L
						angpt4.S				LOC108719489	c2orf50.S		rnf144b.L	ptk2b.L
						cep170b.S				irf2bpl.S	ccdc39.L		otop2.L	b4galt1
						ganab.L				khdc4	ccdc96.L		bcam.L	myb.L
						thbs1.L				akap13.S	dynlrb2		atp13a5.L	atl3.L
						bmpr2.S				pabpc4.L	fam92b.S		nyap2	hes5.3.S
						hid1.S				meis3.S	LOC108708812		LOC108717906	nradd.L
						clcn5.L				Xelaev18038622m	ccdc63.S		rasgef1b.S	spry4.S
						camk2g.L				mapk6.S	sidt1.S		relt.L	mafb.S
						stard3.L				mllt10.L	ccdc65.S		dleu7	pxdn.S
						pik3r2.S				fibp.L	grb7.L		foxi4.2.L	gramd1a.L
						adck1.L				trim71.S	dnah2.L		dcx.L	sult1c4
						Xelaev18013479m				trim8.L	LOC108706691		ncam1.S	prmt5.L
						krt16.L				smug1.L	rsph10b.S		Xelaev18034274m	mid1l2.L
						muc3a				eif4g1.S	caps2.L		vipr1.S	Xelaev18000592m
						MGC52622				disp1.L	lrrc23.S		elf1.L	pprc1.L
						slc30a7.S				LOC108713945	LOC108698160		mttp	LOC100492708
						post.L				mcm6.2.L	hydin.S		twsg1.S	raig3
						ralgps1.S				mga.L	katnal1.S		slc4a4.S	insr.L
						retsat.L				rbm26.L	LOC108708706		ero1b.L	angpt4.L
						ptpn23.S				cry1	nipal1.L		bambi.L	hes5.5.L
						LOC108701166				sema6a.S	dlec1.L		myt1.L	rspo2.L
						golph3l.S				zswim9	ttc21a.L		opn5.2.L	sult6b1.5.L
						trpm5.L				scml2.L	rspry1.L		etv2.L	susd1.S
						ccdc149.S				LOC108714701	gjb3l.S		habp2.L	xarp.L
						unc50.L				znf644.L	LOC108698822		chrnb2.S	steap3.L
						golga3.L				trrap.L	krt8.2.L		slc6a8.L	Xelaev18037130m
						LOC108706721				gng7.L	c16orf87.L		olig2.L	cdx1.S
						baz2b.L				fzr1.L	lrrc61.L		rundc3a	znf185.S
						MGC98819				sephs1.S	lhb.L		esr10.S	sult6b1.5.S
						post7p.L				LOC108702355	foxa1.L		LOC108705612	fbxw2.L
						edem3.S				phip.L	rtbdn.S		mef2c.L	LOC108701744
						post10.L				rnf44.S	krt17.S		prdm16	cdk5rap3.L
						tmem63a.L				mllt4.L	bbs4.S		p2ry2.S	tusc2.L
						atp13a2.L				map2k6.L	tmem229bl.L		nrxn3.L	klf15.2.S
						slc6a7				ubr5.L	usp2.L		arhgef25.L	gas1.L
						mfsd14a.S				LOC108715906	inpp1.L		hrh1.S	arhgef40.S
						flrt2.L				arhgap5.L	ano10l.L		dach1.S	plk3.S
						Xelaev18038969m				mcm2.S	cfap161.L		Xelaev18001208m	pdxdc1.S
						raver2.S				gpbp1l1.S	ccdc87		ripor2	pgp.L
						epn3.L				LOC108705295	LOC108707795		LOC108712047	tmem251-b
						bean1.L				atp1a1.S	fut4		tmeff1.S	klf15.2.L
						elovl3.S				vangl1.L	cfap45.S		Xelaev18018363m	hivep1.S
						gosr2.L				mfge8.L	egfr.L		fgf13.L	ccdc129.L
						etnk1.L				fbxl3.S	c1orf158.L		ntn1.L	myo9a
						capns1.L				cbx1.S	ccp110.S		mras.L	wars2.L
						efnb2.L				zc3h4	loc100216141.L		erf.L	cdx4.L
						man2a1.L				dgkd-like.L	esrra.L		Xelaev18044644m	cyp26a1.S
						gopc.S				ccdc71l.L	katnal1.L		LOC108708063	sp5.L
						tm9sf2.L				efnb1.L	wdr38.L		smad6.S	msantd3.S
						kdm7a.S				lmo4.2.S	cdc14a.L		nox4	xk81a1.S
						zbtb46.L				chd2.L	six3.L		jchain.L	errfi1.L
						dab2ip.L				capn8.S	hmha1.S		emid1.L	fam83g.S
						gcm1.L				polm.S	Xetrov90020413m.S		tbx1.L	nup188
						LOC108695829				mpv17l.S	anxa11.L		mespa.L	rnf43.L
						ptprz1.L				h1fx.S	nkx2-3.L		rnf225	rchy1.L
						golga1.L				hsf2.L	trim13.L		il6r.S	znf503
						slc35a2.L				myc.L	march10.L		slc17a7.L	tbc1d30.S
						arap1				wdr77.S	ccdc24.L		ncr3	emc1.L
						zfand4.S				kiaa0907.L	wrap73.L		trh.L	gk.L
						nlrc4.L				tuba3c.S	ttc6.L		Xelaev18002426m	samd8.S
						pcdh7.S				foxo4.L	LOC108709811		bach2.L	wdr12.S
						trim8				kdm5b.S	ggt6		Xetrov90001989m.L	notch2.L
						mbd6.S				pank1.L	wdr63.L		ceacam19	znf362.L
						capns2.S				acvr2b.S	usp2.S		cacna1g	otud4.S
						tmem259.L				rad54l2.S	prr18.S		LOC108719060	MGC114904
						mgat1.L				slc7a6.L	armc3.L		rassf10.S	slc17a9.S
						ano9.L				stambp.L	rab37.L		cat.1.L	pprc1
						tmem183a.L				lsm4.L	lrrc46		rnf112	ttc39c.L
						yif1b.L				ppp1r12a.S	ccdc191.L		pdk4.S	tns2.L
						gigyf2.S				rassf3.S	dzank1.L		LOC108711637	c2cd5
						dmxl1.L				dcaf8.S	cdc14a.S		gprc5c.L	LOC108719509
						sh3d21.L				surf6.L	ppp4r4.L		nr1d2.L	slc35e2b.L
						fer1l4				gmeb2.L	eps8l1.S		nos1ap.S	cmtm3.L
						abhd13.S				tonsl.L	c17orf98		npr3.L	gtf3c5.S
						kiaa1324.S				rbm25.L	kctd9.L		tmem72.L	arhgef16.L
						ergic2.L				atf7ip.L	dnah10.L		rbm47.S	LOC108709890
						prkca.S				txndc9.L	tmem53.L		rxfp1.S	tuba1cl.3.S
						ap1b1.L				zbed6cl.S	iqca1.L		p2ry1.S	sbf2.L
						pi4k2a.L				gpatch8.S	kif27		eya1.S	prelid1.L
						map3k2.L				afdn.S	stkld1.L		dyrk3.L	LOC100037903.1
						tbx2.S				slc25a1.L	styk1.L		a2ml1.L	mroh1.S
						cltc.L				rps5.S	invs.S		kat6a	sh2b3.S
						rnft1.L				ywhae.L	sytl1.S		Xelaev18043282m	Xelaev18008019m
						zbtb7b.S				baz1b.L	cep350		gtf2ird1.L	osbpl2.S
						atf7.L				hells.S	lrrc9.L		mgc145260.S	trpm4
						LOC108704672				parp1.L	ankrd66		st6gal2.S	rock1
						calr				cep170b.L	saxo2.L		slc4a1.L	LOC108697430
						dnajc3.L				trappc13.S	Xelaev18000198m		pnkd.S	gripap1.L
						MGC68448				znf282	fam160a1.S		bsnd.L	xarp-like.S
						ydjc.L				dnajb12.S	LOC108704529		hsd3b1.L	LOC108716776
						mars2				proser1.L	esrra.S		pros1.S	apcdd1.S
						msx1.L				LOC108698093	cfap57.L		LOC108703407	lgalsl.L
						acbd3.L				kdm3a.S	ccdc108.L		pygm.L	ndc1.L
						szl.L				ints6l	ccdc60.L		wnt11b.L	Xelaev18027889m
						ube2n.S				sptssa.S	ccdc27.S		galr3.S	dync1i1
						nfe2l1.S				atp1a1.L	casc1.L		xfrp	c14orf37.L
						mgat4a.S				znf462.L	hsbp1l1.S		nsg1.L	dhrs3.L
						fam174b.L				ipo5.L	cfap206.L		miga2	ago1.L
						fam174b.S				tab3.L	pcdh8.2.S		rhbdl3	wdr18.L
						prelid1.S				LOC108714696	LOC108710961		serpind1.L	LOC108701284
						tfcp2l1.L				ago4.L	cgrrf1.L		slc16a3	myo5b.S
						chmp1b.L				cachd1.S	LOC108699634		ppp1r13l.L	tmem87a.L
						tbc1d25.S				top2b.S	krt18		Xelaev18032183m	btc.S
						wdr13.L				bmp4.L	ccdc113.L		LOC108713175	fut6.S
						kiaa0141.S				c19orf68.L	pde9a.L		ttn	vegfa.L
						rhbdf2.L				trim33.L	LOC108705949		muc1.L	fzd3.L
						hes1.L				bcorl1.L	fbxo43.L		otop2	rapgef2.L
						mcm10.L				arf1.S	cep295.S		matn4.S	LOC108701155
						kmt2c.S				irf2bpl.L	cfap157.L		myo10.2.S	ttc21b.S
						abhd13.L				pds5b.L	zdhhc1.L		vwc2l.2.L	ago1.S
						rps12.L				upf3b.L	ccdc173.L		Xelaev18046953m	ag1.S
						adam9.S				cnot3.L	heg1.L		abcb4	cdc42bpa.L
						arid3a.S				kiaa1191.S	ca12.L		admp2.L	bicd1
						sec22a.S				eef1a1.L	strc		sorcs3.L	dcaf13.S
						fundc1.L				kdm5b	creb3l1		sv2b-like.S	LOC108701721
						c22orf39.L				rlim.L	fjx1.S		pcsk9.L	thap5.S
						kiaa1147.L				top2b.L	tbc1d24.2.S		fut4.L	stam2.L
						tsen2.L				rps3a.S	tmem150a		cfb.L	rpe65.S
						m6pr.L				rps6.L	efhc1.L		hoxd1.S	pde4a
						rsbn1l.S				rfx5.S	foxl2.L		nts.L	hes6.1.L
						col18a1.L				cdc34.S	LOC108698173		slc39a5.L	fut3.L
						rab6a.L					scnn1g.S		Xelaev18017221m	znrf3.S
											ccdc151.L		LOC108708906	prdm2.L
											speg		Xelaev18047655m	lsm1.S
											greb1.L		pde4c.S	alad.L
											LOC108705105		scai.S	fam199x.S
											b9d2.L		hps5.L	klf6.S
											cetn4.L		b3galt5	slc35c1.L
											loc100494782.L		msx2.L	fam120c
											hook1.L		dexi	fam83a.S
											arhgap27.S		Xelaev18033837m	osbpl8.L
											Xelaev18037285m		Xelaev18010183m	ercc4.L
											LOC108704696		cfp.L	rasgef1b.L
											c1galt1.S		arnt2.S	slc39a6.S
											xrra1.L		ism2.L	Xelaev18030675m
											asb13.L		trpm2	hprt1.L
											edem1.S		creb3l4.S	timm17a.L
											efcab2.L		tbc1d14.L	pmm2.L
											lrrc71.L		zfp36.S	tmem170a.S
											drc7		LOC108716735	slc18a1
											ttll5.L		prickle2.S	myc.S
											rnf152		b4galt6.L	LOC108698396
											bmpr2.L		lrrn4cl.L	gemin7.L
											slc16a12.L		adgrg6	napg.L
											tctex1d1.S		znf750.L	LOC108709773
											errfi1.S		fblim1.L	use1.L
											fbn3.S		arsi.S	ciart
											chl1		b4galt5	slc19a2.L
											fam183b.L		inf2.S	fcn2
											gmppb.S		setbp1.L	c3orf17.L
											kcne5.S		hapln3.L	nek2.L
											rabl2b.S		c5.2.L	LOC108695554
											prdx4.L		LOC101732807.L	znrf3.L
											cfap44.L		LOC108706398	riok1.L
											atp6v1g3.L		bmp3.S	hmox1.L
											sptssb		tead4.L	uspl1.S
											sdpr.S		gas2l1.L	kbtbd4.S
											LOC108712926		Xelaev18015828m	LOC108716951
											hoxa1.L		LOC100485105.S	adat2.L
											elk4.S		MGC130877	uba5.S
											ctbs.S		Xelaev18022166m	fam177b.L
											foxq1.L		Xelaev18013765m	pvrl4.S
											Xelaev18004144m		olfm4.L	ptp4a3.L
											glo1.S		Xelaev18041815m	atad3a.S
											c9orf116.S		Xelaev18038720m	znf408.S
											tnk2.L		nrarp	btg5.L
											cfap126.L		st3gal2.1.S	apcdd1.L
											dixdc1.L		MGC53786	tmcc3.L
											h1f0.S		tmprss11bnl	dcaf4.L
											galnt6.3.L		dach1.L	tesc.L
											fam227a.L		LOC108705839	usp9x.L
											ccdc40.S		Xelaev18025987m	pex11b.L
											mycbp.S		LOC108698309	septin9.L
											mgst1.L		kank1.L	fam199x.L
											bbs12.L		tdgf1.2.S	msx1.S
											usf1		myh6.S	cab39.L
											zbbx.L		LOC108715341	hdac6.L
											fam126b		ccdc80.L	thumpd2.L
											Xelaev18028374m		aifm3.L	cdc42bpa.S
											golga3.S		arhgap12.L	crocc2
											hoxa11.S		atoh1.S	LOC108718861
											galnt6.1.S		grpel2.L	rbfox2.S
											plekhg5.S		prrt3-like.S	fam63b.S
											bmp7.1.S		Xelaev18024346m	degs3.L
											nek6		slc5a6.L	rrn3.L
											rab34.S		eva1a.L	thumpd3.L
											tctex1d1.L		chsy3	slc12a2.L
											MGC75872.S		tesk1.S	hmcn2
											pih1d3.L		slc38a8.L	c18orf21.L
											lmo4.1.L		sh2d3c.S	ubiad1.L
											atp6ap1.1.S		Xelaev18032195m	slc39a10
											efcab7.L		dstyk.S	krt5.7.S
											itgb3.L		skil.L	arfgef2-like.S
											jun.L		cers6	vezt.L
											zdhhc2		fam8a1.L	auts2
											tekt1.L		s100a10.S	rin3.L
											elk4.L		pdgfa.S	mfsd6.L
											ccdc103		Xelaev18035110m	lcmt2.L
											ankrd22.S		LOC108703211	chpt1.L
											pih1d1.L		prex2	selenow2.L
											drc3.L		f2rl1.L	igf1r.L
											dnah5		tubb3	tacc3.S
											pacrgl.L		crhr2.L	ube2n.L
											sigirr.S		endod1	c2cd5.L
											stpg4		hcrtr2.L	sh3pxd2a.L
											sertad4.S		evx1.L	atp8b3.L
											tctn3.L		fam179a.S	dtl.L
											ccdc157		cfd.L	slc35d2.S
											Xelaev18003283m		c5.L	dad1.S
											MGC83023		atf3.S	dopey2.L
											tbcel.L		LOC108711502	dgat1.L
											nfat5.L		efnb3	dot1l.S
											rarres1.L		LOC108709100	krt.S
											znf703.L		mtmr7-like.L	fer.L
											tp73.L		Xelaev18028750m	LOC108704423
											c4orf47.L		Xelaev18008189m	qars.S
											dnai2.S		capn2.2.L	kiaa1324l.L
											klhdc8a.S		st6gal2.L	slc33a1.L
											cep76.L		LOC108701132	pigu
											enkur.L		faah.3.S	efna1.S
											fbxo16.L		rnf165.S	mcm6.2.S
											Xelaev18025028m		trpm6.L	LOC108712218
											kif3b		smad7.L	mak16.S
											tstd1.S		a2m	thap2.S
											smtnl1		glis3.S	pdcd2.S
											atp7b.L		glul-like.1.L	tmem39a.L
											camkk2.S		mamld1.S	tsc1.S
											gcnt1.S		LOC108719828	LOC108718134
											maats1		junb.L	tmem19.L
											ern2.L		sema5b.S	zmynd19.S
											znf474.S		gpr52.L	arfgef2-like.L
											zmynd10.L		tsku.L	rad9a.L
											cfap58		LOC108717136	pdcd2l.L
											LOC108699297		nos1.L	Xetrov90026452m.S
											pdk3.L		timp2.S	kcmf1.L
											adgrf5		sema4c.L	znf229.S
											LOC108711247		klf13.S	armc10.L
											arntl.L		arnt2.L	fam3c.S
											s100a2		Xelaev18022167m	gpatch4.S
											ypel2.L		pde3a	macf1
											poc5.L		slc23a2.L	serinc5.S
											nrdc.L		tf.S	phactr3.S
											ifngr2.1.L		ecm1.S	ttc4.L
											MGC68910		hmgcs1.L	slc27a2.L
											ankef1.L		h2afy2.S	med8.L
											slc16a9.L		c1orf127.L	dennd3.L
											col16a1		tnk2l.S	zbtb40.L
											LOC108717899		aff2.S	usp9x.S
											cdk20.L		col13a1	plekhm1.S
											nipa2.S		mesp2.S	dgka.L
											LOC108704226		kcnk18.L	ddhd1.L
											LOC108701745		Xelaev18001656m	LOC108714507
											hk1.L		slc18a3.S	ing4.S
											creb3l4.L		epas1.S	polr1c.L
											ascl1.L		esyt3.S	gigyf2.L
											zfand2b.S		tmtc1.L	ube2w.S
											nek5.L		pla2g10.S	klhl36.L
											spef2.L		tnip2.L	slc25a39.L
											tchh		zfp36l1	plekhm1.L
											kiaa0556.L		tead4.S	ralgds.S
											nfkb2.L		sspo.L	arhgap35.L
											arfip2		fosl2.L	kitlg.L
											gmpr2.S		rbm38.S	golga4.L
											nfe2l2.L		myo10	sh3rf2.S
											dnaaf3.L		chst3.L	tubb.L
											nipal3.L		fam214a.L	b3gnt7.L
											LOC108698123		fmo5	dnajc11.S
											bbip1.L		rbbp8.L	clptm1.S
											jun.S		fntb.L	ccdc142.S
											ift46.L		scel	mydgf.L
											dnali1.S		bcl2l12.L	csgalnact2.L
											tmcc1.S		hes9-1.S	rnf38.S
											bbs1.L		slfn13.L	picalm.1.S
											fbxo46.L		fn3k.L	surf4.2.S
											tbccd1.L		tnfrsf19.S	notch2.S
											rgs12.L		ahdc1.L	ccdc71.S
											cntrob		grhl2.S	gas1.S
											col1a2.L		rnd3.L	zbtb5.L
											s100g		dkk2.L	trub1.L
											efcab1.S		sept12.L	rps6ka3.S
											tubb4b.S		tmem56.2.S	entpd4.L
											pick1.S		Xelaev18022244m	stx12
											slc4a1.S		il1rap.L	serbp1.L
											plpp5.L		anpep.S	polr1a.L
											mob2.2.L		gprc5c.S	aqp4
											gne.S		muc1.S	znf236.L
											snai1.S		LOC108716750	loc108718659.S
											cenpj.L		stxbp5.S	eif2ak3.S
											rsph6a.L		dapk1.S	slc44a4.L
											rab3a.S		stard13.L	slc39a10.L
											fam20b.S		st3gal2.1.L	dhx33.L
											miip.L		plppr4.S	nle1.S
											ankrd24.L		LOC108700061	nup210.L
											cfap20.S		arhgap6	atp6v0a2.L
											dydc1.L		Xelaev18006811m	aspg.L
											comt.L		bora.L	uri1.S
											mfsd6l.S		pank3.S	itpa
											ccdc96.S		lmx1b.1.L	cdk6.L
											sphk1.L		opn8.S	ptcd3.L
											arhgap27.L		LOC108707645	aamp.S
											ago3		ppp1r3d	LOC108719544
											loc734020.L		arsk.L	shkbp1.L
											dhcr7.S		cblb.S	palb2.L
											mapk15.L		klf9.L	dus4l.L
											LOC108697646		tiam1.L	nudt1.S
											cxcl16.L		znf469.L	lama5.L
											Xelaev18019738m		rnf144b.S	znf654.L
											fam160a1.L		tcp11l1.L	rictor
											spata6l.L		foxh1.L	dtl.S
											c18orf54.S		lrp4.L	rnf146.S
											heatr6.S		hspg2.L	setd4.L
											gk.S		znf532.L	mrto4.S
											itfg1.S		slc7a5.L	fancm.L
											MGC131348		sesn1.L	fchsd2
											tlcd2.S		fbp1.L	aamp.L
											cdkl2.L		hao1.L	snapc5.L
											tuba1cl.2.S		slc5a3.L	b4galnt3.L
											tmem218.L		Xelaev18017686m	LOC108709654
											spsb3		prrx1.L	wsb1.L
											LOC108704568		LOC108709923	stag2.S
											slc10a3.S		zfp36l1.S	polr3h.L
											LOC108702892		slc13a3.L	atxn2.S
											c19orf44.L		bambi.S	mfsd11.S
											dhcr7.L		pim1.S	srrd.L
											rab8b.L		fermt1.S	larp4.L
											ralgapb.L		MGC115708.L	cd3eap
											syne3.L		rufy3.S	sbno2.S
											lpcat1.S		rell2.L	evpl.L
											deaf1.L		LOC108705130	trip11.L
											bnip2		tpst1.L	wasl.S
											tbc1d15.S		cpz.S	agpat3.L
											ube3a.L		Xelaev18028754m	eif4a2.L
											higd1a.L		znf710.S	mst1r.L
											paqr5.S		usp32.L	fam8a1.S
											dnaaf1.S		epn1.S	yipf6.L
											c21orf59.S		il11ra.L	mrpl55.L
											cep70.L		serpinh1.S	slc22a4.L
											npdc1.1.S		evx1.S	hspa13.L
											rsph9.L		MGC82975	msto1.L
											fam63a.S		traf4.S	trdmt1.L
											trim68		mettl24.L	LOC108717955
											ubp1.L		LOC108700066	hipk1.L
											gata6.S		Xelaev18009275m	prkcd.S
											macc1.L		ip6k1.S	cbfb.S
											stil.L		Xelaev18004738m	arhgef1.S
											gas8.S		xbp1.S	cab39.S
											sphk2.L		mtmr4.L	wdsub1.S
											ncor2		myo10.2.L	smim10
											dnaaf5.S		aifm3.S	zbtb40.S
											dnai1.L		runx1t1.L	mtfr1.L
											chmp4c.L		Xelaev18039481m	pcyt1a.S
											cep350.S		abcg2.S	ccnt1.S
											nme9.L		fam84b.S	efs.L
											yipf4.L		mxi1.L	akap1
											meis2		fsbp	xpo4.L
											gmppb.L		loc100145576.L	vamp7.L
											ift52.L		Xelaev18001785m	gopc.L
											yipf4.S		Xelaev18019967m	tm9sf3.L
											pear1.L		nrg1.L	picalm.S
											slc4a11.L		pcdha13.L	nus1.L
											sec22b.L		ets1.L	sec24b.L
											rfx1.S		prex1.S	ficd.L
											tmprss4.L		1700017n19rik	lrif1
											gm39120		mcc.S	c7orf26.L
											abcd1.L		limd2.S	igbp1.L
											fbxo15.S		cfp	ints10.L
											tspan13.S		ncam2.S	rere.S
											cdk7.L		ccdc68.L	rnf139.L
											cfap52.L		LOC108717763	esrp1.L
											socs5.S		rybp.L	ocrl.S
											ttc41		was.S	ncbp1.S
											nme5.L		gns.S	atrx.L
											dlx1		gngt2.1.S	c6orf62.L
											LOC108713208		eya2.S	tm9sf3.S
											colgalt1.L		c15orf39.S	ddx54
											rab15.S		prkci.S	sulf1.L
											slc6a16.S		pitpnm3.L	prickle3.L
											stard10.L		Xelaev18001994m	golga5.S
											brca2.L		cdkn2c.S	smchd1.L
											kcnk1.S		b4galnt4.S	topbp1.L
											lrrcc1.L		traf4.L	wdr46.L
											ccdc130.L		siglec1.L	mrto4.L
											lrtomt.S		cfap54	utp15.L
											nipal4.L		sox5.L	fam234a.L
											MGC82342		id2.S	rpl4.S
											trim45.L		kalrn.S	mia3
											ywhah.S		ncoa3	cep152.S
											faim.S		sema3f.S	igf2r.L
											kif24.L		tnfrsf10b.S	ctps1.S
											sipa1l3.S		rab40b.S	ubr5.S
											uckl1.S		slc6a13.L	MGC83673
											rest.S		lef1.L	heatr1.S
											loc100497729.L		hes7.1.L	LOC108696788
											bcar1.L		lhfpl2.L	txndc12.L
											tmem238.S		fgfrl1.L	zfp91.S
											tmem168.S		pias3.L	syde2.S
											atp1b2.S		tmem79.L	tmed9.L
											purg.L		LOC108696316	znf654.S
											cspp1.L		mid1.L	srpra.L
											LOC100486385.S		cd82.L	cyp4b1.2.L
											ubl3		cdh6.S	tmem45b.L
											LOC108700400		foxa2.L	tnks2.S
											c2cd3.S		Xelaev18028753m	rangap1.S
											ribc2.L		znf710.L	urb2.L
											spag8		phactr1.S	ptp4a2.L
											btg3.L		march8.S	gen1
											slain2.L		fxyd6.L	gemin5
											fzd8.S		sept7.S	sprtn.S
											ift20.L		atp1b1.L	thap7.L
											irak1bp1.S		prickle2.L	znf518a.L
											smad9.S		stmn1.S	strap.L
											ccno.S		LOC108712601	nup188.S
											ccdc112.L		bcr.S	ptrh2.L
											bbs7.L		tmprss2.1.S	cdca7.S
											rnf115.S		pfn4.S	gigyf1.L
											smim7.S		btg2.S	wdr36.S
											slc30a5.S		afap1l2.S	MGC108429.L
											katnb1.L		bmp4.S	nufip1.S
											c3orf14.L		Xelaev18039754m	pi4k2b.S
											ly6g6c.L		bcorl1.S	timm17a.S
											eef1a1o.L		col13a1.L	nr2c1.L
											LOC108696555		atp10b	leng8.S
											Xelaev18040914m		tmem163.S	strap
											mypop.L		hand2.S	stambp.S
											wdr31.L		pknox2.S	emg1.S
											cfap77		Xelaev18019831m	dolpp1.L
											npdc1.1.L		znrf1.L	c17orf97
											spryd3.L		Xelaev18030509m	slc12a2.S
											reep4.L		mmp14.L	rpl8.L
											bbs5.L		LOC108698034	lig3.L
											LOC108704278		cmtm5.S	ap1m2.L
											ganc.L		LOC108708333	faf2.S
											prkar1a.S		cebpa.L	c9orf114.L
											zbtb21.S		klf2.S	spsb1.S
											dera.S		metrnl	sptbn2.L
											rab11a.S		Xelaev18011560m	gemin4.L
											mns1.L		pcdh9.S	mak16.L
											mycbp.L		Xelaev18041958m	ube3d.S
											rundc1.S		LOC108711632	papd4.L
											kdf1.L		tns1.L	fkbpl.S
											ncoa1.S		lasp1.L	grwd1.L
											adipor2.S		tlx3	arid1a
											rnf44.L		hap1.S	ranbp2.L
											ddost.S		kcnk5	chmp4b.S
											cep350.L		zmiz2.S	nus1.S
											dnaaf2.L		apbb2.L	znf526.S
											vwa5a.L		sbspon	krt18.L
											endod1.S		notch3	exosc6.L
											kiaa0753.S		arhgef19.L	phf6.S
											c5orf15.S		fads1.S	noc2l.L
											rassf6.S		Xelaev18013734m	emc1.S
											Xelaev18000401m		LOC100037118	pdcl3.L
											dnajb5.L		dlx5.S	selk.S
											stk36.L		hipk2.L	MGC146454.L
											tmed1.L		mesdc1.S	trim67.S
											rps21		frmd4b.S	rps6ka3.L
											tax1bp3.S		LOC108712667	smyd5.L
											mpp5.L		LOC108700650	nol8.L
											wwtr1.L		ncs1.S	c6orf62.S
											rpl27a.S		tet3.S	pa2g4.L
											hmgcl.S		map1lc3b.L	edc3.L
											katnal2.L		phactr4.S	ddx56.L
											derl1		LOC108700080	chsy1.L
											nudt9.L		acsm3.L	arl8b.L
											tsc22d3.L		xplcg1a	gm20188
											rfx1.L		Xelaev18027269m	Xelaev18012451m
											ndufa8.L		foxo1.L	slc39a7.S
											lmln.L		fosl2.S	wdr43.S
											lnx1.L		gjb2.L	naa10.S
											sdf2l1.L		Xelaev18012294m	tti1.L
											ist1		Xelaev18011395m	c14orf169.L
											znf593.L		pdzrn3.L	psmg1.L
											med13l.L		Xelaev18007821m	dnajb12.L
											rapgef1.L		pdgfa.L	ppip5k2.L
											nat9.S		evi5.S	tcf20.S
											phf20l1.L		dyrk3.S	tceb3.L
											copb1.L		p2ry4.L	cdca7.L
											cxcr4.S		atf3.L	dph2.L
											spcs1		Xelaev18027791m	ptafr.L
											ttc7b.S		cdh1.S	rrs1.S
											stim1		ece2.L	mpdu1.L
											hdlbp.S		limd2.L	acsl1.S
											cep83.L		fbxo33.L	xetrov90011961m.L
											nkrf.S		zfp36l2.S	kmt2e.S
											rap2b.S		pcdh17.L	fam179b.L
											necap1.L		socs3-like.1.S	utp15.S
											tp53bp2.S		nav2.L	eif6.S
											cops5.S		src.S	LOC108710017
											golph3l.L		uhrf2.L	LOC108718070
											ankrd50		Xelaev18040057m	senp1.L
											cldn4.S		palm.S	sars.L
											rpl39.S		Xelaev18032309m	prkci.L
													slc6a8.S	gcc1.S
													pax2.L	ppp3cc.S
													apoc1-like.L	rpl17-c18orf32
													pzp-like.2.L	ripk4.L
													ralgds.L	eif3k.L
													afap1l2.L	phrf1.S
													Xelaev18020076m	rps6kb1.S
													edn2.S	trmt10c.S
													cpe.L	ddx51.L
													gse1.L	rps3.S
													LOC108702079	MGC53707
													LOC100495096.1	slc20a1.L
													Xelaev18028029m	LOC108719008
													fbxo21.S	trap1.S
													ckm.L	esf1.L
													slc16a1.L	ak2.L
													gdpd1.S	trap1.L
													tubb6.S	kmt2d.L
													rgmb.L	polr3a.L
													rap1gap.S	frrs1.L
													dpp10.S	sf3b3.S
													nfil3	clptm1.L
													Xelaev18047127m	rps7
													Xelaev18037856m	prc1.2.L
													LOC108710290	trim29.L
													dnmbp.S	crls1.S
													znf462.S	dhx38.L
													ankrd10.L	tspan6.S
													fcn1	ldb1.S
													slc7a8.L	utp18.L
													LOC108712868	rpl8.S
													faxc.L	rrp1b.S
													cyp27a1.L	ccndbp1.S
													Xelaev18041870m	ddi2.S
													nwd1.L	pex6.S
													xkr8.S	tbc1d25.L
													fzd4	anxa4.L
													Xelaev18044839m	wdr48.L
													acer3.S	ppp2r3b.L
													pik3r1.L	slc29a2.L
													dpf1.S	ctsa.L
													sema6d.L	casp7
													LOC108697063	ahctf1.L
													LOC108700791	gdpd2.L
													rnf135.L	elof1.L
													mob2.2.S	nifk.L
													ckmt1b.S	zfx.L
													LOC108697222	rictor.S
													brsk2	rnf220.1.L
													magi1.S	LOC108698533
													mast2.S	rpn2.L
													hbegf.L	larp4.S
													gpatch8.L	copb2.L
													LOC108705525	tm9sf4.L
													Xelaev18022168m	rpl32
													mtus1.L	znf518a.S
													dnmbp.L	wdr82.S
													mnt.S	MGC84194
													kng1.L	pnrc2.L
													dlc1.L	utp4.L
													scmh1.L	uso1.L
													pdp2.L	eif4e.L
													asxl3.S	ss18.L
													flvcr2.L	ago4.S
													fhl3.S	znf740.L
													mprip.L	alg2.L
													LOC108708769	timm9.L
													hpgd.S	rpl26.L
													LOC108700617	ttc14.L
													mrc2.S	rpsa.L
													sephs1.L	kmt5b.L
													ranbp3l.L	nol11.S
													LOC108710484	rps6kb1.L
													mid1.S	rpl7a.S
													pdgfb.L	setd6.L
													fras1.L	usp37.L
													tmem198.L	slc26a11.L
													mllt3.L	kcne5.L
													ccng1.L	golgb1.S
													Xelaev18028404m	eif4b.S
													tead1.S	b3gat3.L
													ldlrap1.L	srm.L
													phf13.L	Xetrov90023445m.L
													cbx1.L	nap1l4.S
													rarg.L	aff4.L
													LOC108711622	rnf139.S
													lama1.L	wdr12.L
													sdc3	gtpbp4.L
													LOC108698246	snrnp200.L
													otud1.L	rundc1.L
													smc1b.L	lsg1.L
													myoc.L	ino80.L
													ptger4.S	b4galt3l2.L
													atf6b.L	szl
													Xelaev18043506m	zbtb17.L
													loc495835.L	anln-like.1.L
													Xelaev18010400m	tm9sf2.S
													mtcp1.L	zc3h6
													ddr2.S	trmt6.L
													LOC100495010.S	znhit6.S
													adcy5	tmed4.S
													hes3.1.S	peli2.L
													fbln1.L	actn4.L
													zfp36l1.L	chd8.L
													depdc7.L	ckap4.L
													nab1.L	ddx1.L
													LOC108718652	MGC81028
													smad6.L	ssr1.S
													b3gnt2.L	itga3.S
													cramp1.S	p4hb.L
													pdk4.L	zcchc9.L
													p2ry11.S	rpf1.L
													bcam.S	usp10
													klhl21.L	zfr.L
													LOC108717416	gnl2.L
													fam222b.L	xab2.L
													Xelaev18026829m	rpl7a.L
													arhgef11.L	mfsd14a.L
													znf516.S	cnbp.L
													txnrd1.L	ap1s3
													LOC108698172	ddx6.S
													fgfrl1.S	rpl31.L
													slc4a10.S	psma3.L
													LOC108703373	pop4.L
													plch1	wdr75.L
													pcnxl4.L	kri1.L
													hn1.L	gnl3.L
													c1orf174.S	rpl4.L
													dll1.S	leng8.L
													fbln1	wac.L
													zmynd8.S	rbm34.L
													rab40b.L	dsp.L
													ano6.L	znf250.S
													rgma.L	cdc25a.L
													slco5a1.S	tjp3.S
													ttc5.S	cyfip1.L
													a4galt	ppip5k1.L
													arl6ip1.L	arpc5l.L
													Xelaev18012293m	mcrs1.S
													mgc145260.L	ranbp2.S
													col11a1.L	hgs.L
													gse1.S	nop2.L
													Xetrov90026715m.L	rps3.L
													twsg1.L	impdh1
													c17orf75.L	rpl17.S
													ndrg4.S	rpap3.L
													LOC108719420	psmc6-b
													rhobtb1.S	pnisr.L
													rbm38.L	ddx56.S
													prr12.S	eif3e.L
													fdft1.L	e2f3.L
													ulk2.L	hnrnpl.L
													gfpt1.L	arid3b.L
													Xelaev18021145m	gart.L
													arid4b.L	rpf1.S
													fam107a.S	eef2.1.L
													plpp3.S	ncapd2.S
													prpsap1.L	nop58.S
													tfe3.S	sbno1.S
													gata5.S	ppia.L
													fzd2	ddx54.L
													fgfr2.L
													LOC108716019
													slc20a1.S
													LOC108716737
													ahdc1.S
													rassf3.L
													tsc22d1
													uck2.S
													LOC101027296
													LOC108701215
													chst12.L
													Xelaev18028564m
													cspg4.L
													cdca2-like.S
													fpgs.S
													c16orf52.S
													spin1.L
													gpr143.L
													cdknx.L
													rras2
													fsbp-like.L
													znf592.L
													als2-like.L
													ier5l.L
													ifnar1
													cxadr.L
													castor2
													cic.L
													tubb2b.L
													slc38a2.L
													intu.S
													LOC108701848
													emp2.S
													myo9b.S
													wdfy2.S
													lrrc8e.L
													arhgap33.S
													cdh13.S
													vgll4.L
													nt5c1a
													gprc5b.L
													rybp.S
													clcn6.L
													ctnna2
													zbtb33.L
													cebpg.S
													sat1.L
													cyp2u1.L
													LOC100489157-like.S
													cecr1.S
													best2.S
													cpeb2-like.S
													hacd2.S
													rapgef1.S
													rgs3.S
													npnt.S
													slc25a29.L
													pdlim4.L
													Xelaev18012289m
													gabarapl2.S
													umod
													bcr.L
													ypel5.L
													Xelaev18043719m
													phox2a.S
													LOC108718887
													znf282.S
													ctdsp2.S
													rasa2.L
													mtcl1.L
													shroom2.L
													acsf2.L
													klf11.S
													LOC108698716
													fgfr3
													mst1.L
													fam129b.S
													ifrd1.L
													fam228b.S
													wasf1.L
													gpx1.L
													lrrc8c.S
													vash2.S
													Xelaev18030442m
													flt4
													Xelaev18041239m
													pcsk6.L
													sema6a.L
													rbms1.S
													prickle1.S
													slc25a44.L
													rhebl1.L
													cdk5r1.S
													LOC108717200
													lrrn3.S
													LOC108707159
													rab11fip4l.L
													brip1.L
													LOC108699904
													Xelaev18012801m
													arhgef11.S
													tsku.S
													patz1.S
													cdk1.L
													gs17.S
													MGC80058
													LOC108717350
													fnip2.L
													cdh2.S
													klf17.L
													rcan1.L
													pced1a.S
													LOC108712891
													ube2e2.L
													afap1l1.L
													znf238.2.L
													lsp1.S
													arl4c.L
													ripply2.S
													tbx20.L
													tifa.L
													fbxo31.L
													mzt1.L
													xkr7.L
													acer2.S
													sowahc.L
													tnip3.L
													gpsm2.L
													rspry1.S
													lbh.S
													tiparp.S
													LOC108704623
													Xelaev18001689m
													has1.S
													nt5dc2.L
													zfhx4.L
													zyx.S
													krt19.L
													kdm6a.S
													atp1b3.S
													kbtbd2.L
													dennd2a.L
													arrdc1.S
													e2f1.L
													ksr1.S
													jade2.L
													nudt4.L
													cenpe.L
													esyt2.S
													cmtm6.S
													cntn1.S
													chst14.L
													snx25.L
													abcc4
													bcor.L
													tgif2.S
													bhlhe22.S
													fmnl3
													igf3.L
													cdk9.S
													ppa2.L
													sap30.L
													elmod2.L
													dip2b
													smo
													klf11.L
													tspan5.L
													pdxk.S
													tbcd.L
													kcnq1.L
													rapgef2.S
													ccdc150.L
													vangl2.S
													loc733735.L
													tiam1.S
													smad7.S
													sema4d
													baz1a.L
													patz1.L
													skida1.L
													rreb1.L
													enpp2
													sdc1.L
													mespa.S
													prdm10.S
													plbd2.L
													nsd1.L
													foxi4.2.S
													ccnl2.L
													pik3ip1.L
													nudt4.S
													stk38l.S
													nxpe3l.6.L
													tmem51.L
													fam222b.S
													ncoa6.S
													zbtb45.S
													bnip3.L
													clca3.L
													ece1.S
													zfhx2.L
													rasa3.L
													acap3.S
													carmil3
													yeats4.S
													ras-dva1.S
													dag1.S
													zzz3.S
													arid1b.S
													pdp1.L
													pdlim5.S
													sox4.L
													pank1.S
													fgd6.S
													MGC76328.L
													msantd4.L
													loc108718659.L
													crocc.L
													lats1.S
													mob2.1.L
													mn1.L
													ptgfrn.S
													polr3gl.L
													itga5.L
													dgkq.S
													asxl3.L
													ksr1.L
													Xelaev18007522m
													rnf13.S
													LOC108708348
													march8.L
													icmt.L
													litaf.S
													igsf3.S
													ppp1r15b-like.S
													zdhhc8.S
													rbak-rbakdn
													ifltd1.S
													calb1.L
													rab11fip3.L
													klf13.L
													ncoa2.S
													znf292.S
													lats2.S
													srcap.L
													cnga2
													atg13.L
													fat1
													atg9b.L
													dok1.L
													mllt10
													clcn3.L
													kif5c
													LOC108710937
													cyp2c8.1.L
													e4f1.S
													c9orf72.L
													arl8a.S
													ankrd10.S
													slc9a3.L
													kcnk5.S
													ptpn4.L
													lsp1.L
													nedd4l
													hap1.L
													kmt2a.S
													cbfa2t2.L
													kpna2.S
													azin2.S
													soga1.L
													slc9a1.S
													neo1.L
													itga2.L
													plec.S
													tbp.S
													sema3a.S
													bmp2.S
													pbx2.L
													zbtb9.L
													arhgap21.S
													sapcd2
													zbtb6.S
													zfhx3.S
													ttyh3.S
													LOC108718648
													fcho1.S
													tab3.S
													col9a2.L
													pdxdc1.L
													ring1.S
													LOC100505446
													gltscr1.L
													myo9b.L
													larp1.L
													gpam.S
													cdca2-like.L
													atg12.S
													Xelaev18041850m
													LOC100488689.S
													ildr1.S
													slc25a25.L
													kdm6a
													pdlim1.L
													iqsec1.L
													ywhah.L
													mcoln1.L
													ggcx.L
													LOC108715350
													cnksr3.S
													tmed8.L
													lgr4.S
													ccnb3.L
													LOC108718782
													alcam.L
													ventx1.1.L
													coasy.L
													pbx2.S
													boc.S
													loc108715171.S
													arglu1.L
													LOC108709261
													btbd7.L
													Xelaev18038498m
													gatd3b
													LOC108705735
													angel2.L
													kif18a.L
													hsf3
													LOC108714724
													gfpt1.S
													tspan15.L
													zswim3.L
													zbtb44.L
													LOC108717369
													kpna4.L
													pygo2.L
													ralgapa2.L
													nes.L
													rps6ka4.L
													tmem52.S
													sik3.S
													otud1.S
													map2k3
													LOC108711752
													LOC108709420
													a2m.S
													tp53inp1.S
													Xelaev18003895m
													MGC85120
													crebzf.S
													MGC68807
													trim39.L
													spsb4.L
													znf800.L
													znf318.L
													fam102a.L
													akap13.L
													coq10b.L
													prkce
													ddit4.S
													chd9.L
													map3k8.L
													kpna3.L
													coa1.L
													fnbp1l.L
													agpat3.S
													wee1.S
													med10
													LOC108695517
													tbc1d14
													mospd1.L
													erf.S
													trim24.S
													muc17
													cgn.L
													ccnl2.S
													nufip2.L
													muc5b
													tubb
													zbtb12.L
													ubap2.S
													mta1
													nagpa.L
													vasp
													dynll1.L
													Xelaev18021540m
													fxyd3
													gata3.S
													LOC108702448
													ephb3.S
													chd6.L
													sbf1.L
													dusp4.S
													ndst2.L
													fem1c.L
													zbtb10.S
													epb41l1.S
													rassf8.L
													fbh1.L
													LOC108699910
													lrsam1.S
													dock7.S
													mybl2.S
													phldb1.S
													shtn1
													syne2.2.S
													fam120c.S
													rnd3.S
													LOC108717924
													znf451
													dph7.L
													atp1b3.L
													crebbp.S
													runx1t1
													slc7a8.S
													LOC108706875
													atmin.L
													ddx3x.L
													uvrag.L
													erbin
													ubtf.L
													cdk8.S
													kdm5c.S
													uap1.S
													caprin2.S
													kansl1.S
													ttf2.S
													pvrl2.L
													tcp11l2.L
													kcnk6.S
													kirrel2.L
													vav2.L
													wnk2
													mycl.L
													dgcr2.L
													src.L
													fbxl20.S
													maz.S
													axin1.S
													cep85l
													usf1.S
													eda2r.L
													lfng.S
													notch1.S
													cecr2.L
													aplp2.S
													cnnm3.L
													rere
													has-rs.S
													shroom1.L
													smad1.L
													ncoa6.L
													chd6.S
													rai14.L
													acvr1b.S
													fam13b.L
													lypla1.S
													lifr.L
													fgfr1.S
													gab1.S
													inpp5b.L
													plk1.L
													vangl2.L
													yme1l1.L
													armc5.L
													arl10.L
													lrig2.L
													ptbp1.L
													man1a1
													gins1.S
													boc.L
													jund.2.S
													lct.1.L
													LOC108718437
													ctdsp2.L
													nsd1.S
													fam222a.L
													sh3bp5l.S
													mgc75753.S
													sesn1.S
													cdkn2aip.S
													fam124a.L
													LOC108709568
													kdm6b.L
													fam64a.L
													nemp1.S
													ppp1r3c.2.L
													pbx1.S
													slc25a28.S
													itga3.L
													efna4.L
													dynll1.S
													hic2.L
													prrc2b.L
													mybpc2.L
													foxn3.S
													dlc1
													arglu1.S
													plpp2.S
													loc100145110.S
													plcg1.L
													ag1.L
													shroom4.L
													senp7.L
													LOC108707019
													ptmap12.S
													tada2b.S
													neo1.S
													rab13.L
													fgfr2.S
													zbtb47.L
													mlxip.L
													xpr1.L
													cdk12.S
													zdhhc17.L
													LOC108712964
													ece1.L
													ick.L
													wiz.S
													znf106.L
													pias4.S
													mgea5.S
													calp1
													qki.L
													fam53a.S
													tfdp2.S
													LOC108707634
													mbd1.S
													sptan1.L
													ubl4a
													armc1
													frmd4a.L
													fam171a1.S
													gpbp1l1.L
													cdh2.L
													tmem67.S
													fam171a1.L
													larp6.L
													zbtb45.L
													prpf8
													sncg.S
													smad2.S
													zzz3.L
													cited4.L
													klhl28.L
													mapkapk5.L
													rc3h1.L
													grx5
													mastl.L
													satb1.S
													zbtb10.L
													znf653.L
													ptpn4.S
													rmnd5a.S
													lyst
													Xelaev18042112m
													LOC108716071
													senp6.S
													csrnp1.L
													ddx28.L
													dnajc14.S
													fam208a.S
													znf592.S
													gtf2ird1.S
													Xetrov90029311m.S
													cyyr1.L
													hnrnpr.L
													c8orf48.L
													cachd1.L
													ell2.L
													setd1a.S
													cenpi.L
													lin9.S
													ell2.S
													notch3.L
													gatad2b
													clspn.S
													prdm10.L
													midn.S
													adnp.S
													znf131.L
													ufc1.S
													mtf2.L
													irx2.S
													LOC108695513
													ccni2.L
													avpi1.L
													abl2.L
													man1b1.L
													LOC494849
													pou5f3.1.L
													tex261.L
													zfx.S
													usp49.S
													MGC84433
													bace2.S
													fnbp1l
													irf2bp2.L
													mycl.S
													rsf1.S
													rbm14.L
													whsc1.S
													tp53inp1.L
													mn1.S
													rfx7.L
													rfx2.L
													siah1.L
													arhgef26.S
													prc1.L
													vgll4.S
													foxk2.L
													chd7.S
													ythdf2.L
													srsf6.S
													hyal2.L
													cln3.L
													vmp1.L
													r3hdm2.L
													ddx3x.S
													usf3.L
													add3.L
													larp1.S
													lamc1.S
													serinc1.S
													ckap5.S
													fam160b2.L
													tns3.L
													LOC108708505
													ppp1r14c.L
													irf2bp2.S
													LOC108707041
													rgs19
													pi4ka.L
													dedd2.L
													pfkfb1.S
													g3bp2.L
													rbms1
													ubap2l.L
													hpgd.L
													ppp4r1l.S
													rbl1.L
													tnrc18.S
													cdk17.S
													taok2.L
													znf638.S
													mta1.L
													epc1.S
													lcor.S
													zmym4.S
													kdm5a
													rnf111-b
													rgma.S
													msantd4.S
													prrc2b
													fam160a2
													nipal2.L
													slx4.L
													capzb.L
													hdac10.L
													xkr5.L
													rarg.S
													map7d1.L
													bcl7a.L
													kansl1.L
													pkp4-b
													kdm5c.L
													znf292.L
													cacfd1.S
													lmtk2.L
													esyt2.L
													znf674.S
													gldc.S
													ubap2.L
													lrp5.L
													cntrl.L
													arhgap5.S
													kdm2b.L
													sufu.S
													lrrk1.L
													emd.S
													inpp5k.L
													smtnl2.S
													peli1.S
													tmem39a.S
													cdc42bpb
													kdm2a.L
													casc4.S
													extl3.L
													rbms2.S
													depdc5
													ptk7.L
													xpo1.L
													LOC108715348
													rnf11.L
													phactr2.L
													clcn3.S
													marveld2.L
													ndst1.L
													msl1.L
													tada2b.L
													c5orf30.L
													Xelaev18044269m
													lamc1.L
													cdcp1.L
													rnps1.L
													ythdf3.S
													loc101731566.L
													men1.L
													mier3.L
													arhgap17.L
													sgms1.S
													ttk.S
													rbm45.L
													luc7l3.S
													mpdz.L
													dyrk2
													LOC108715172
													rnaseh2b.L
													epc1.L
													mex3b.S
													pex10.S
													brd1.S
													pip5k1a
													arrdc3.L
													ptma.L
													LOC397846
													szrd1.L
													LOC100158389
													enoph1.S
													csnk2a1.S
													nemp1.L
													scaf1.L
													ccnyl1.L
													dleu7.L
													krt18.S
													kat6a.L
													kifc1.L
													mtss1.2.L
													zmym2.L
													LOC108698339
													sfpq.L
													zbtb17.S
													eif3a.L
													brd4.L
													ywhae.S
													zc3h4.L
													mknk2.S
													slf2.L
													smg1.S
													cyth1.S
													znf740.S
													rps10
													dnmt1.S
													ubap2l
													pbx1.L
													cnot3.S
													arid3a.L
													notch1.L
													kdm4a.S
													mier1.L
													arih1.L
													rbm4b.L
													rbm4b.S
													glul.L
													hnrnpll
													hnrnpa3.S
													taok2.S
													fbxw7
													slc12a3.2.S
													cbs.S
													rpl6.L

## Sheet: St12-13_Decreae
List of Genes for all Overlapping Temporal DESeq Groups, corresponding with supplemental figure 3
All_Lineages	Epi-Meso-Neur	Epi-Meso-Endo	Epi-Neur-Endo	Meso-Neur-Endo	Epi-Neur	Epi-Meso	Epi-Endo	Neur-Meso	Neur-Endo	Meso-Endo	Epi	Neur	Endo	Meso
n/a	n/a	nomo3.S	n/a	n/a	n/a	eml4.S	cdv3.S	n/a	n/a	cdc123.S	rcl1.L	cracr2b.L	tp53bp1.S	blzf1.S
		frg1.L				ccnb2.L	dctpp1.L			ykt6.S	plcd1.L		gpr107.L	psmd8.S
		birc5.2.S				shcbp1.S	wdr45b.S			ppm1d	ccna2.S		ythdc1.L	cbx3.S
		psme4.L				cdk9.L	rab5a.L			sgta.L	smarcd1.S		dnm1l.S	mapk11.S
		cul3.S				bmp1.S	ppp6r1.L			scaf11.S	nsmce4a.L		dlgap5.S	pitrm1.L
		col4a3bp.S				cops2.L	zcchc8.L			kiaa0226l.L	ccne1.L		nsun2.S	cdc20.L
		eif2b5.S				kdsr.L	nkap.L			cdr2.L	pfkfb4.L		nsrp1.L	sept2.L
		zc3h11a.S				por.L	dapk3.S			gtf2e2.L	galnt7.S		supt6h.S	cltb.S
		tpx2.S				st6galnac2.L	bloc1s6.S			bora.S	cdt1.L		dis3l2.S	supt6h.L
		carnmt1.S				hexb	kif20a.S			pfkfb3.L	vps13b.L		dnajb11.S	calm2.S
		mmadhc.L				MGC83206	scp2			nelfb.L	tjap1.S		slc37a3.L	rnf112.L
		stk3				os9.S	cyp26a1.S			atp6v0c.L	rcc1.L		fyttd1.S	gnai1.L
		pus7.L				emc3.L	micu1.S			smap1.L	ddrgk1.L		ankrd11.L	ccna2.L
		MGC81630				cops2.S	rhbdd2.L			rnf14.5.L	cdh3.S		aqr.L	taf8.S
		styx.S				sde2.S	plxna1.L			rpp38.S	fyb1		actr2.L	faf1.L
		caap1.L				atp11b.L	zdhhc15.S			cdkal1.S	stk17a.S		skiv2l2.S	tstd3.L
		ppp2cb.L				ncdn.S	pigb.L			psap.S	cpsf2.L		prpf38a.S	nup37.L
		kiaa1109.L				hsf2.2.L	LOC108704265			btaf1.L	mn1.L		cdca8.L	dsn1.L
		trmt11.L				ptpn2.S	gpt2.S			mkrn3.L	bloc1s4.L		cwf19l1.L	calhm2.S
		bak1.L				agtrap.L	got2.S			pds5a.S	cuedc2.L		sirt5.L	clstn1
		c20orf194.L				kif15.S	jak1.L			fscn1.S	LOC108706515		rae1.S	MGC82347
		dppa2/4.1.L				ptdss1.S	best2.L			cat.2.S	rnf167.L		ap1g1.S	chmp6.S
		vamp8.L				ubxn4.L	cttnbp2.L			dnal4.L	fgfr4.S		xpot.S	ap2m1.S
		aldh3b1.L				naa50.L	dopey2.S			triqk.L	atp6v0b.L		gpalpp1.L	mrps5.L
		trmt44.L				tbc1d17.S	arhgef2.L			ptp4a1.L	nuf2.S		pip4k2a.S	mst1.L
		cdo1.S				nras.L	atg4c.L			vta1.S	dcp1b.S		smn2.L	ppp1r12c.L
		mdc1.L				ralb.L	akap12.L			hmces.L	ccdc120		ppp4r3b.L	cldn6.2.S
		dennd4c.L				slc25a13.S	tmem255a.S			cul1.L	LOC108704408		mbtps1.L	wdr45b
		cnep1r1.L				tsc22d1.L	hnrnpll.S			spg7.L	cdc14b.S		ppwd1.S	ddt.L
		opa1.S				impa2.L	irx1.L			odc1.S	tesk2.S		mars	msi1.L
		ube2h.S				tmem184c.L	adamts1.L			tmx2.L	slc12a4.L		LOC108701277	gemin6.L
		ubac2.L				nabp2.L	adgrg1.S			slc38a10.S	sssca1.L		tsnax.S	tmc6.L
		usp24.L				mrpl3.S	crx.L			rngtt.S	cept1.S		sec24d.S	mtor.L
		csnk1g3.S				fbf1.L	ppfibp2			smc6.L	atp9a		mettl14.L	gtf2h3.L
		cpt2.S				slc31a1.S	rdh9.L			rbbp5.S	lmnb3.S		nfyb.S	larp1b.L
		nup88.L				dpy19l1.L	scube2.L			flna	spns1.L		cdc40.S	tpm1.L
		cdc27.L				fermt2.S	filip1.L			ctu1.L	mipep.S		brms1l.S	bag4.S
		naif1.S				cyfip2.S	crx.S			cul4b.S	mutyh.L		ept1.L	e2f7.L
		letm1.S				LOC108719053				c11orf73.L	cdh3.L		sumo1.S	myh10.S
		nsmaf.L				ccne2.S				napa.S	kiaa0368.L		mdn1	gkap1.L
		arfgef1				smtn.L				ptprk	mcl1.S		erlec1.S	map2k1.L
		ttc13.S				sra1.S				phf14.L	pex26.L		lsm6.S	rnd1.S
		znf605.L				cltcl1.L				birc5.2.L	pard6g.S		pum2.L	plaa.S
		hmgxb4.S				snx5.L				nomo3.L	pde7a.S		snrnp48.L	gprc5c.S
		extl2.L				zzef1.S				tspan31.S	cdon.L		zc3h18.S	ubqln1.S
		smap1				ppp1r9al.L				g6pd.L	sin3b.L		lrrfip2.L	vgll4l.S
		LOC108711198				atxn3.L				rabgap1l.S	dmd.1.L		hectd3.L	vps4b.S
		itch.S				kctd5.L				cand1.S	dlx6.L		nob1.S	c19orf43.L
		stxbp3.L				gm15246				cul3.L	crip3.S		jmjd6.S	LOC108719050
		tmem33.S				mst1.S				pan2.S	unkl.L		zpr1.L	sdcbp.S
		aprt				nusap1.S				loc734029.L	yrdc.S		vps26a.L	mrpl44.S
		hmmr.L				zfand3.L				cul1.S	tmem163.S		csnk1g3.L	ifi30.L
		npc1.L				hacd3.L				tmem161a.L	cdon.S		mapk8.L	ube2d1.S
		qrich1.2.S				nphp4.L				ociad1.L	dtwd1.L		csnk1g1.S	msh3.L
		ofd1.L				tnrc18				tbc1d1.S	fra10ac1.L		pcmt1.L	hax1.L
		naf1.L				ubxn2a.L				ilvbl.L	sestd1.L		iqch.L	tyms.L
		apba3.L				znf395.S				herc4.L	ppp1cc.S		zhx3.L	acly.L
		LOC108700013				gpc4.S				pef1.L	msmb		gpatch11.L	LOC100497184.L
		arih2.S				zc3h7b.L				capn5.S	lix1l.L		npm3.S	eif4e
		plxna1.S				brca1.L				srpk3.S	wipi1.L		sdf2l1.S	cst7.L
		txlng.L				nprl3.L				fzd7.S	lfng.L		lin9.L	cdca8.S
		patl1.L				fam193b.L				hs2st1.L	gas1.S		txlna.L	enkd1.L
		smn2.S				plcd3.L				c1qbp.S	dna2.S		ammecr1.S	cldn6.1.L
		cdc23.L				nabp2.S				cyp17a1.L	cd99l2.L		ventx2.1.L	dscc1.L
		ccdc9.S				vps13a.L				sucla2.L	cenph		carnmt1	ccne2.L
		ap3d1.L				ikbip.L				abhd17a.L	cald1.S		cox11.L	uba6.L
		pef1.S				stx7.L				polr2k.L	aff1.L		stk26.S	ilkap.L
		ube2g1.S				MGC75760.L				adarb1.L	ipmk.L		rnf121.L	wbp2nl.S
		ctdp1.S				ano10.L				gtf2a1.S	ubtd2.L		sh3glb1.L	fxr1.L
		ap5m1.L				stk3.S				uqcc2.S	itpr1.S		sri.L	ermp1.L
		cep131.L				LOC108711638				acoxl	insm1.L		chordc1.S	ube2d4.S
		znf407.L				ankrd54.S				mon2.L	gpc4.L		scaf8.S	vps11.S
		trmt5.L				dhcr24.L				dbr1.L	foxo1.L		rexo5.S	dctd.L
		cul9.L				sdha.S				lpar6.L	hand2.S		tmem33.L	atp6v1g1.L
		ccdc50.S				ube2j1.L				opa1.L	dcaf17.L		srp68.S	papss1.L
		metap1.L				arhgef39.L				wdfy3	gdpd5		stk11ip.L	ipo9.S
		cmtm7.L				ska3.L				xrn1.L	cpsf4.L		hbs1l.L	gnb4.L
		atp8b4.L				pttg1				mob3a.L	adprhl2.L		nol12.S	papss1.S
		galnt2.S				natd1.L				g6pd.S	MGC131138		txnl1.S	c15orf39.L
		sfxn4.L				cwc27.S				atp6v1a.S	soga1.L		cdv3.L	vps29.S
		hira.L				kmt5a.S				ccnb1.2.L	ptch1.L		c1orf52.S	MGC147242.L
		pcid2.S				hadha.S				syap1.L	bnip2.S		serp2.L	chtf18.L
		mon2.S				LOC108704254				slc9a1.L	c6orf203.L		n4bp1.L	exoc4.L
		arhgap29.L				rwdd1.S				dnal4.S	fgfr4.L		golga2.S	g2e3.L
		cnfn.3.L				myo1a.L				dync1li1.S	tgif2.S		arfgap1.L	gtpbp1.L
		dennd4c.S				c14orf93.L				bmp7.2.L	tgif2.L		sec24a.L	ap1m1.S
		gna11.S				gpx7.S				ints2.S	Xelaev18030357m		gmnn.S	ap3b1.L
		hmbs.L				agpat1.S				galc.L	vash2.S		nlk.2.S	fkbp8.L
		wls.S				ercc2.L				sirt4.L	MGC81661		cdc16.L	blmh.L
		lamp1.S				bloc1s5.L				pitpnb.2.L	Xelaev18028564m		lmnb3.L	ankrd28
		ldlrap1.S				dpy19l4.S				lzic.L	neurl1b.S		spcs3.S	LOC108714266
		fam175a.S				sppl2b.S				spc25.L	abhd17b.S		atad2b.L	pola2.L
		cetn3.S				atp2b1.L				otulin.S	upk2		tsr3.L	sde2.L
		lpp.L				soat2.S				uxs1.S	dpy19l3.L		vps8	znf239
		ciao3.S				pde7a.L				paip1.L	rbpms2.S		cdc37.S	memo1.S
		pnpt1.S				pik3c2a.L				papd5.L	foxf1.L		pex19.L	kti12.L
		fig4.L				map2k5.L				gs17.L	thtpa.S		tbc1d4.L	elovl5.L
		muc5acl.S				abhd16a.L				lrrc1.L	mterf3.S		pygm.S	hdac8.L
		cdca7l.L				ptprs				h1foo.S	edil3.S		taf2.S	mpst.L
		ccne1.S				pfkfb4.S				ankrd13a.S	insm1.S		ap1b1.S	iqgap2.L
		rwdd4.S				hdac4.S				pkmyt1.S	shroom2.L		bud31.S	ero1a.L
		gcfc2.S				rnf216.L				mtmr12.L	ndufaf5.L		amd1.S	cdipt.L
		lmo7.S				acot9.L				nphp1.L	snx22.L		pdcd6.L	taok1.S
		atp6v0a1.S				ccdc90b				rnpepl1.S	abr.S		eny2.L	kif13b.L
		efr3a.L				ppp3ca.L				stx19.L	rab3a.L		fam114a1.L	ppp6r3.L
		eml2.L				h6pd.L				fbxl5	slc44a4.S		kif2c.L	rprd1b.L
		zfyve16.S				pid1.S				ipo13.L	kdm2a.S		slc44a1.L	txndc5.S
		snx14.L				naga.L				rnf126.L	plekhg3.L		mettl9.S	vamp1.L
		fastkd2.L				exoc5.S				ric8a.L	fam107b.S		golga4.L	ube2k.S
		kiaa1033.L				shisa5				dctn2.L	acsl6.L		nsdhl.L	MGC68458
		fez2.L				per3.S				stag1.L	LOC108708488		rpusd3.S	nup88.S
		ttl.L				eps8l3.L				gls.S	inpp5a.1.S		akirin1.S	wash1.L
		cyb5r4.S				akap8.L				mettl3.L	mcm3.L		timm22.S	stxbp3.S
		velo1.L				zfat.L				pip4k2c.S	zc3h12c.S		exosc10.L	tmem79.S
		acat2.L				fam135a.S				thada	pdk4.S		srbd1.L	tpp2.S
		psip1				yes1.L				prkaca.L	tars2.L		fam110c.S	pkp3.L
		smagp.S				slc2a8.L				stk26	LOC108700849		usp16.L	slc27a6.L
		pla2g6.L				wnk2.L				bloc1s6	dcp1a		fam160b1.S	gramd4.S
		dda1.L				cyp2c18.S				gpa33.S	abcb9.L		rps6ka1.S	mycl.L
		nptn.L				pdxk.L				lclat1.L	mvb12b.S		gnl1.L	akap8l.L
		znf830.S				tdrd1.L				arfip1.L	pald1.L		shcbp1.L	l3mbtl3.S
		edc4.L				sec31b.S				xtm4	sall1		exd3.L	4930579g24rik
		ppa1.L				shroom3.L				trim44.S	c17orf53.S		wdr36.L	notum.L
		cenpa.L				tmem184b.S				LOC496342	pex1.L		osr2.S	pigt.L
		mrps17.L				Xelaev18015396m				cand1.L	loc100158410.L		gnl1.S	chfr.L
		commd2.L				fam172a				hip1r.L	wdfy2.L		LOC108718073	eml1
		arl15.L				traf3ip2				pole2.L	zmat3.S		tcf7l1.S	ykt6.L
		mfsd4b.S				itpr1.L				pold2.L	rgs3.L		ybx2.L	cab39l.S
		srsf7.L				pms1.S				smarca5.S	lrrc16a.S		zcrb1.L	mrpl53.L
		h6pd.S				gemin2.S				slc35b3	st3gal6.L		camk1.L	MGC86492.S
		znf276.S				mesdc2.L				ergic1.L	rnf5.L		tmem131.L	tom1l1.L
		alg10.S				wdr81.L				ppp3ca.S	tmem55a.L		grinl1a.S	smtn.S
		paip1.S				acadl.L				ggps1.S	acsf3.S		cadps2	ppa1.S
		tceanc2.S				rab29.S				timm21.L	unc93a.L		tmem263.L	atg2b.S
		tut7.S				lrp1.S				MGC97820.L	s1pr5.L		dut.S	rpusd2.L
		eps15l1.L				MGC84586				reps1.L	acat1.L		kpna6.S	uchl1.L
		fut10.L				snx6.S				mettl15.S	lhfpl2.L		csnk1g1.L	sgta.S
		parg.L				alas1.S				fbxo34.S	ankrd29.L		otub1.L	acot11
		klc1.L				btbd19.S				rab5a.S	sptbn5.L		epha4.L	rb1.S
		tpx2.L				osbpl11.S				pafah1b2.L	spast.L		zcchc10.S	ctf1
		cog2.S				lamp1.L				add3.S	jag1.L		nampt.L	sycp2l.S
		slc30a2.S				cers3.L				atp6v1h.L	rbm38.S		arfgap2.L	fam171a1.L
		pgk1.L				elavl3.L				trappc11.L	ttc39a.S		galnt2.L	ubxn8.L
		mettl16.L				c8orf76.S				parn.L	apln.L		wdr18.S	parvb.S
		uggt2.L				st3gal-iii				ifrd2.S	tmem221.L		eya3.L	uhrf1.S
		lca5.L				ctnnal1.S				ppm1b.L	naxd.L		entpd7.L	mrpl42.S
		wdhd1.L				herc3.L				dock5.L	cyp51a1.L		drosha.L	rnf182
		rmdn3.L				pard3b-like.L				dennd2d.S	trpv2.L		atp6v0c.S	xpr1.L
		tarbp1.L				appl1.S				ppp1cc.L	cgnl1.S		maats1	nrxn3
		rnf123.L				rb1cc1.S				ctsd.S	c1orf159.L		sucla2.S	ccdc93.L
		slmap.L				herc1.L				pacsin2.L	ubtd2.S		tpr.S	pdhb.L
		fam109b.L				abr.L				gnai1.S	lonrf3.L		bckdk.S	faf1.S
		znf182				c15orf41.L				vps35.S	st3gal2.1.L		LOC108711265	arhgap1.S
		atg16l1.L				tmem220.L				plpp1.L	osbpl1a.L		lsm12.L	snx31.S
		sh3bp1.L				Xelaev18041216m				dhps.S	atp8a1.L		yod1.L	cdc25c.S
		cdc27.S				hacd3.S				mapk14.S	dgkq.S		ssbp3.L	tbc1d9b
		cyp4v2.S				sh3d19.S				anks1a	lhx8.L		pitpna.L	xiap.L
		umad1.L				gpatch1.L				LOC108711140	slco5a1.S		mfap3.S	cluap1.L
		armc8.S				prrg1.S				naglu.L	bscl2.L		LOC108700186	kdm3b.S
		gpi.L				parp11.S				Xelaev18001619m	kcnma1.L		tstd2.L	mfsd11.L
		hace1.L				fpgs.S				mocs3.L	lonp2.L		brwd3.L	dym.L
		caprin2.L				gpr137c.S				aldh7a1.S	crbn.S		gtf3c6.L	usp38.S
		smco4.L				dapk3.L				haus1.L	hyal2.S		gna14.L	atg16l1.S
		usp24				rab27b.L				MGC68662	ano8.L		cast.S	dnajc15.L
		appl2.L				mapkap1.L				slc12a6.S	fcho1.S		btrc.L	rhov.L
		nrbp1.L				slc16a3.L				pomgnt1.S	taok1.L		tp53rk.L	strn.S
		smagp.L				LOC108718301				ctdp1.L	tex264.S		znf608	pla2g12a.S
		acbd5.L				slc26a6.L				Xelaev18011182m	pcdh9.S		kiaa1671	rassf7.L
		slc30a9.S				cnpy2.S				naa16-like.L	emp1.L		ppp6r3.S	ide.L
		tmem62.S				kiaa1328.L				itsn1.S	gas1.L		txlng.S	gatsl2.L
		lrrk2.L				tapt1.S				prss36.L	scaper.L		srsf5.S	ipo9.L
		dis3l2.L				prelid2.L				slc9a3r1.S	pcdh19		ift57.S	tbc1d10a.L
		plin3.L				ankrd27.L				trappc8.L	apba1.L		kiaa1210.L	usp3.S
		myo5a.L				spidr.L				mettl9.L	fam65c.L		slc2a10.S	mob4.L
		utrn.L				tpte2.L				ube2g1.L	pcdh18.L		cuedc1.S	rhot2.L
		mycbp2.L				sh3bp5.S				nxn.S	slc6a14.2.L		nup54.L	f2rl1.S
		alkbh8.S				asap1.S				os9.L	LOC108709746		pja2.S	mnat1.L
		cnih4.S				mospd2.L				tada3.L	rnf130.S		coro1c.S	vwa8.L
		mrpl1.L				sbk1.L				brms1l.L	ezh1.S		golim4.L	eps15l1.S
		dis3l.L				arhgap10.S				tubd1.L	Xelaev18008189m		pi4kb.S	haus5.L
		tubgcp3.S				ptar1.L				rp2.L	gmnc.L		dnaaf5.L	ern1.S
		mfsd12.L				dap.L				atp6v0b.S	prnp.S		raf1.S	fcho2.S
		ano1.L				rpap1.L				siae.S	fam189a1.S		snip1.S	LOC495950
		glce.L				dapk1.L				myof.1.L	dennd2c.L		zcchc6.L	gtsf1.L
		rwdd1.L				gstcd.L				loc100493771.L	pdgfb.L		tsc22d2.S	tdrd5.L
		ccdc68.S				rassf2.L				mtmr1.L	flrt1.S		fam98b.L	LOC108719787
		tdh.S				apba2.S				snx2.S	irf8.L		cycs.L	manbal.L
		gpd2.L				stat2.L				rab14.S	LOC108703941		pdzd8.S	pabpc1l.L
		dcaf6.L				sspo.L				pou5f3.2.L	tada2a.L		pawr.S	LOC108699776
		top1.2.S				LOC108704332				ccdc124.S	rgcc.L		ifrd2.L	brf2.L
		mmp15.S				kmt5a.L				lrrc27.L	adat1.S		prrg4.S	maea.S
		snx7.L				tlk1.S				sorl1.L	ins		gna14.S	tmem43-like.L
		orc6.L				ppp3cc				Xelaev18017238m	hal.2.L		parp2.L	nsun6.L
		cc2d1b.S				rps6kc1.L				cactin.S	ror2.L		atp5b.L	ppt1.L
		tp53i11.S				specc1				LOC108719555	Xetrov90024734m.S		dnah9.S	loc733561.S
		LOC108713105				ttc13.L				gtpbp1.S	cmpk2.L		cct5b	ecd.S
		mgat4b.L				tyro3.L				sept11.L	1500009l16rik		gna11.L	qsox1.S
		inpp5a.1.L				nploc4.L				wbp4.L	atoh1.S		cyb5b.L	vmp1.S
		pdzd2.S				timeless.S				gpm6b.L	cyp1a1.S		acsl3.S	c1orf21.L
		slc38a9				kiaa0825.L				sh3glb1.S	LOC108715669		pm20d2.L	kcnab2.L
		myo1c.S				snn.S				utrn-like.2.S	mab21l2.S		dennd2c.S	kidins220.S
		phc3.L				rnf41.L				rabep1.S	tmem158.S		naa30.L	mettl25.L
		tyw3.L				hbox10.S				gyg	LOC108708493		suco.S	proca1.L
		xpo6.L				rps6kc1.S				capn7.L	pdp1.L		dr1.L	kif2a.L
		loc733556.L				map2k7.S				vta1.L	grem1.L		gak.S	cox7a2l.L
		taok3.L				LOC108712660				map7d2.S	LOC101243550		josd2.L	tmem120b.L
		gdf9.L				tex2.2.S				lysmd2.L	emilin2.L		lmtk2.S	atp6ap1.2.S
		dph5.S				cndp1.L				mgat4a.L	znf577.L		ddx19b.S	znf618.S
		slc9a7.S				tex2.2.L				wdr44.L	adgre1		stambpl1.L	afg3l1p.L
		pou5f3.3.L				pou5f3.3.S				pik3r4.L	slc6a8.S		clasp1.L	mdh2.L
		prkar2b.S				ankrd35.L				brox.S	keap1		atpaf1.S	LOC108719063
		LOC105947450.S				nbas.L				plrg1.L	ccndx.S		nup35.S	LOC108699863
		arhgap10.L				lpp				kif15.L	prdm14.S		hal.1.L	lpgat1.L
		eps8.S				fbxw8.L				ssbp2.S	txnrd1.S		LOC100036994	myh9.S
		pik3r4.S				snx5.S				snx2.L	c11orf96.S		pole4.L	abcd3.S
		eps8.L				lhx5.S				pigs.L	olig3.S		sae1.L	pomt2.L
		lrp1.L				bcs1l.L				tulp4.L	tph1.S		pou2f1.L	dpyd.L
		pik3r2.L				ethe1.S				zar2.L	lrrn4.S		ptpn14.L	anks3.L
		megf11				zyg11b.S				kctd6.L	pigv-like.L		LOC108705022	ccdc148.L
		amfr.L				hras.L				cacnb4.S			manf.L	hirip3.S
		rcc1.S				atp8a1.S				pdcd10.S			fam214b.L	dctn1.L
		iqgap1				chst2.L				fzd7.L			fgd1.L	sccpdh.L
		wdr44.S				wee2.S				tbc1d5.L			fam3a.S	mettl6.S
		clstn2.S				rgcc.S				sycp2l.L			slk	bend5.S
		c7orf60.S				pclo.L				zp3.S			cxcr4.L	kpna6.L
		LOC100158299				cr1b				dnajc10.L			uaca.L	ap3s1
		LOC108714350				hps1.S				dnajc14.L			arfip1.S	cox15.S
		ctf2				lrrc16a.L				cuedc1.L			cdc14b.L	naa35.L
		dus1l.L				tdgf1.3.L				anapc4.L			alg9.L	acsl4.S
		rnf34.L				homer3.S				spef1.L			arfgef2-like.S	pard6b.L
		mpp6.S				brpf3.S				tll2.L			osr2.L	grb2.S
		pdpr.L				cox5b.2.L				agtpbp1.L			fam210a.L	herc4.S
		pawr.L				trmo.L				mipep.L			sacm1l.L	gyg1.S
		btbd8.L				chst10.L				atl2.L			ccdc71.L	homer2.L
		ubac1.S				fndc7.L				hectd4.L			fgd4.L	timm44.S
		bod1l1.L				rph3a.S				dnah3			gipc2.S	zp4.2.L
		tango6				gdpd5.S				ppp2r2b.S			tmem209.L	col4a3bp.L
		nf2.L				elavl3				clcc1.S			eri1.L	limch1.L
		hnrnpll.L				mogat2.2.L				pdcd10.L			papd4.S	vars2.L
		dcaf10.S				chd3				ssbp2.L			ctage5.L	ap3d1.S
		cntln.L				c18orf8.S				gpd2.S			spata2l.L	slc25a26.L
		dapl1.S				slc38a9.S				LOC108696874			fam98a	camkmt.L
		atp9b.L				ccdc88a				cd55			mapk8.S	tom1l2.L
		mov10l1.L				rnf170.S				irf5.L			slc39a9.S	trmt61b.L
		tor1b.L				prdm9.L				dmtf1.S			bdp1.S	LOC108698101
		ccdc62.L				elmo2.L				tuba4.S			dnaja4.1.L	vav2.S
		cgnl1.L				acer2.L				abca5.S			tmem2.L	arih2.L
		baiap2.S				LOC108718445				ivns1abp.L			c1orf50.L	tbc1d19.L
		sh3pxd2b.L				fam73a.L				dcp1b.L			rab5b.L	calcoco1.S
		pdpr.S				cited2.L				cyct.L			pphln1.S	lrrc49.L
		gpr137c.L				sorbs3.L				cdk5rap2.L			huwe1	kdm4c.L
		nfkbie.L				kank3.S				gyltl1b.L			gale.L	scarb2.L
		slc22a15.2.S				brap.L				klhdc10			rpp21.S	serpine2.L
		MGC115216				lrp2.L				nde1.L			pkp4.S	c7orf60.L
		patl2.L				efna5.S				ccdc158			snrnp35.L	MGC115587
		tor1b.S				tmem39b.L				slc34a2.L			crkl.L	arhgap33.L
		gtf2i.S				ehbp1				myo5a.S			upk1b.L	rfxap.L
		mcoln2.L				MGC115510				mpp6.L			wasl.L	dock1.S
		LOC108709626				gprc5b.S				arl6.L			irx1.S	cul4a.S
		rmdn2.S				admp2.L				ntan1.L			avl9.L	sept10.S
		map3k4.S				oma1.S				rab14.L			cdr2.S	dusp18.L
		inpp4a.S				csk.L				MGC115273			itgb8.L	ipo4.L
		fitm2.L				corin.L				rnaseh1.S			upk2.S	cnpy2.L
		atg4c.S				ralgps2.L				LOC108695555			csnk1e.L	tmem65
		lin54.S				zcchc11.S				tmem2.S			zswim4.L	ezh2.S
		MGC115657				foxh1.2.L				mfn1.S			efhd1.L	tmem106b.L
		LOC108719547				kiaa0226l.S				bnipl.L			ncs1.L	dgat2.L
		ccnb1.L				golga2				blnk.S			manf.S	alg3.S
		LOC108701404				sema3c.S				arhgef10.L			rfwd2.S	elp3.L
		inpp4a.L				sds.L				gbf1.S			tspan13.L	rptor.L
		tbc1d22b.S				arhgap26.L				ccz1b.L			rnf5.S	tbc1d12.L
		kifap3.S				grin1.S				parn.S			psme3.L	lrba.L
		gdpd5.L				aifm3.L				helz.S			dhrs3.S	agpat1.L
		zic1.L				gpr65.S				myo1c.L			tmem18.L	ttc39b.L
		fbxo25.L				traf4.S				ecsit.S			prkar2a.S	map3k5
		adcy4.L				trafd1.S				tmem57.L			ptprf.S	socs3-like.1.L
		gbf1.L				wasll.S				dhcr24.S			plcl2	nbn.L
		grip1				cyp1a1.L				wdtc1.L			mixer.S	rcn1.L
		zar1l.L				ptpru.S				pde4dip			neurl4.S	pard3b
		LOC108709286				LOC108709196				arntl.S			ndufaf1.L	sat1.S
		ywhag.L				LOC108701852				tuba4.L			prkar2a.L	herc6.S
		larp1b.S				foxi2.L				slc7a9.L			sec24b.L	iqgap2.S
		csnk1g2.L				spon2.L				elavl2.S			arel1.L	paox.L
		ehbp1.L				dlk2.S				pigk.S			pum2.S	LOC108704499
		loc100493164.L				cxcl11.L				ubac1.L			pnhd.L	mnd1.L
		rev1.S								lace1.L			adpgk	entpd2.S
		tnfaip8l3.S								nectin1l2.1.S			rbm27.L	mrpl1.S
		dand5.S								cenpo.L			prom1.L	usp43.L
		b3gnt4.L								ppm1e.S			ventx2.2.L	smarca2
		slc20a2.L								dda1			uba3.S	fsip1.L
		prdm1.S								b3glct			btrc.S	hebp2.S
		letmd1.L								pitpnb.2.S			svil.L	tram2.L
		itprip.S								higd1a.S			clasp1.S	uchl3.L
		tspan1.S								loxhd1.L			arl2.L	slc15a4.S
		rev1.L								lrrc56.L			gpr180.S	ift88.S
		h1foo.L								cox19.S			zic3.L	gnpat.S
		immp1l.L								usp25.S			sumo1.L	fam60a.L
		xpo6.S								strn			scube2.S	kif23.S
		ccnb1.S								pigh.L			LOC108706563	nxpe3l.1.S
		dapl1.L								mreg.S			tmx1.L	kiaa0319l.S
		prdm1.L								pkd1l1.L			rab8b.L	mxd3.S
		tmcc2.S								clpx.L			taf4b.S	rfc3.L
		optn.S								sh3d19.L			eef1akmt3.L	ipo8
		prickle4.S								LOC100489554.L			luzp1.S	eif5b.L
										fam26d.L			pus1.S	agl.S
										LOC108706543			c18orf8.L	pik3c2a.S
										zranb3.L			sowaha.S	pcyox1.L
										jak2.L			ppp1r13b.L	nfatc3.S
										LOC108700142			prmt7.L	trim25
										hook2.L			arl2bp.L	hsd17b12.L
										ptdss2.L			lefty.L	LOC108718648
										dck.1.L			gad1.2.S	p2ry2.L
										pign.S			pvrl1-like.2.S	rufy1.L
										mbp.S			adam28.1.S	rab3ip.S
										heatr5b.L			gne.L	neil3.L
										atp2b1.S			lman1.S	LOC101734284-like.L
										clint1.L			timm50.L	bri3bp.L
										irak1.L			loc100494211.S	fnip2.S
										epb41l4b.S			eif4enif1.S	plin2.S
										dctn2.S			fam122b.L	trim39
										ywhag.S			nemf.L	impa2.S
										fadd.S			trim54.L	slc2a9.L
										hist1h2aa.L			rbm27.S	pir.L
										fam46c.L			xmc.S	fuca1.L
										tgfbr1.S			pibf1.S	sh3bp5.L
										sclt1.L			prss33	rint1.L
										gramd1c.S			nbeal1.L	lamtor1
										agbl5.S			irf6.L	mkrn1.S
										tbc1d1			gas2l3.L	fmo2
										gdf9.S			nrdc.S	gprc5c.L
										dock9.L			dnah6	prune.L
										setd7.L			LOC101731753.L	cetn3.L
										cask.S			LOC108700229	ap3s1.S
										cflar.L			il17rd.L	ca10.L
										LOC100127794.L			slc35a4.S	tbc1d22a
										cask.L			snai1.L	enosf1.S
										trim23.S			slc2a13.S	pask.L
										lrp8.L			loc100494211.L	otud6b.S
										larp6-like.1.S			scyl2.S	adam17.S
										smarcc2.S			lman1.L	inpp5f.L
										zar1l.S			ssb.L	loc108718668.L
										camkk1.S			frzb.S	timm50.S
										dennd4b.L			arhgef18	tax1bp1.L
										zic2.S			lnpep.L	LOC100505442
										ppp2r2b.L			1a11.L	smarcal1.L
										tpgs2.L			st14.S	pkr2.L
										pam.S			srpk3.L	lrwd1.L
										dck.1l.L			stim2	ap1ar.L
										nsun7.S			tm9sf1.S	rfx2.L
										g6pc.L			LOC108719085	slc10a7.L
										armc2.L			ncald.S	bace1.L
										fopnl.L			mrs2.L	LOC108707216
										kbtbd3.S			enpp6.L	hemk1.L
										prss16.L			tdrp.L	taf1d
										tspoap1.L			armc7.L	MGC68519
										pou5f3.2.S			grhl1.L	farp1
										eomes.L			MGC68680	cep19.L
										cep41.S			stra6.L	pi4ka.L
										cep170.S			arfgap2.S	sertad1.S
										hpca.S			fgd1.S	calcoco1.L
										kiaa0586.L			lrig3.S	mettl22.L
										bmp7.2.S			LOC108704685	vps18.S
										stc1.L			rgs12.L	tbc1d23.S
										not.L			spg21.S	ccdc69.L
										rilp.S			pqlc2.L	LOC108699095
										zfp36			helt.L	rap1a.L
										eomes.S			eif1.L	adarb1.S
										gng10.L			MGC79993	fam122a.S
										not.S			naa60.L	rap1a.S
										antxr2.L			pomk.L	rnf157.L
										ccna1.L			dnaaf1.S	xxylt1.L
										gdf1.L			sema4b.L	banp.L
										negr1.L			uprt.L	wfs1.L
										slc18a2.L			rassf7.S	suox.S
										npy2r-like.1.L			tRNA-Met	spast.S
										Xelaev18008577m			insrr.L	slc41a2.S
										tdgf1.1.L			gltp.S	uhrf1.L
													ptcd1.L	ubxn4.S
													c19orf12.S	irs2
													LOC101733813.1	mrpl36.L
													mgat4a.S	kcnab2
													slc5a9.L	slc25a29.S
													tspan13.S	xzar2
													mtmr8	pigo.L
													elavl2.L	gltp.L
													rab27a.L	Xelaev18025079m
													tecpr2.L	kcnk7.L
													uxs1.L	ptges2.L
													acvr1.L	rab22a.S
													b4galt1	spata18.L
													prrg4.L	rabep1.L
													tmem150b.S	zpax.L
													dld.S	Xelaev18040026m
													slc1a5.L	fam21a.L
													Xelaev18031388m	LOC108705723
													sec24b.S	spata13.S
													aldh1a2.S	ccar1.S
													glmn.L	eloa
													dusp22.S	kctd2-like.L
													itgb3.L	LOC108708164
													ppp1r14a.L	prodh.L
													sebox.L	ireb2.L
													mettl4.S	tube1.L
													prnp	pid1.L
													llgl2.L	rnf123.S
													tvp23b.S	sox2.L
													ibtk.L	eogt.L
													wasll.L	ppp1r9a.L
													vcan.L	agpat4.S
													mix1.L	gphn.L
													anks1a.S	ppp3cb.L
													LOC108704134	ntpcr
													abca1.S	cep41.L
													schip1.L	lmbr1.L
													wwc1.L	cisd2.S
													mcfd2.S	morc3
													ddb2.L	hcn2.S
													sfrp2.L	slc37a2.L
													trpv4.L	ppm1l.L
													loc100127873.L	rabac1.S
													galnt6	Xelaev18014049m
													clcf1.L	crbn.L
													Xetrov90015528m.L	hadha.L
													dixdc1.L	pask
													eps8l2.S	Xelaev18004920m
													ift140.L	MGC130950
													ptprg.L	gpr155.S
													rbfox3	plekhm2.S
													irf6.2.S	inadl.L
													xarp-like.S	wdyhv1.S
													tmf1.L	dcaf6.S
													daam1.S	mxi1.S
													stx5.S	itpkc.L
													tnfsf10l.L	arhgap12.S
													alg6.L	MGC75714.S
													pgm2l1	nkrf.L
													Xelaev18036963m	smco4.S
													Xelaev18000237m	LOC108704510
													hsph1.S	LOC100488695.S
													rassf1.L	mcoln3.L
													glmp.L	mrpl3.L
													scarb1.L	rubcn.L
													apc.L	rnaset2.L
													scoc.S	Xelaev18004919m
													MGC68655	LOC108703777
													larp4.L	Xelaev18037615m
													dact1.S	vps33a.S
													pik3ca.S	oxct1.L
													rcor1.L	enpp1.L
													mrpl54.S	paics.2.L
													naa15.L	slc2a9.S
													csnk1e.S	rdx.S
													hnf1b.S	mib2.S
													slc1a6.S	snap91.S
													bix1.3.S	hmbs.2.S
													xvent-2b	tmem30b.L
													rin2.L	smarcad1.S
													nckap5l.L	spag6.S
													arhgap27.S	aplf.L
													bsg.S	b9d1
													pnrc2.L	cntn4.S
													zdhhc16.S	cuedc2.S
													gclc.L	wipi1.S
													Xelaev18010420m	dhrs7b.L
													sox11.L	slc39a9-like.1.L
													aldh7a1.L	lrrc58.S
													sulf1.L	irf9.L
													spata13.L	acr
													exd2.L	nuggc.L
													LOC108706156	LOC108699955
													rad51d.L	kctd18.L
													hhex.S	armc8.L
													thnsl1.L	slc7a8.S
													fam115a-like.L	bpgm.S
													tmf1.S	vps9d1.L
													tmem45b.S	LOC108712544
													chrd.L	nsun4.L
													homez.S	pacs1.L
													nav3.S	mmadhc.S
													bix1.1.S	brdt.L
													lgi4.L	strip2.L
													fzd8.L	agfg1.L
													mixer.L	epg5.L
													fam102b.L	lrch2.L
													LOC100191024	ap3s2.S
													slain2.L	nisch.S
													galnt6.1.S	mtrr.L
													dip2c	LOC100489887.L
													tnfrsf19.L	MGC115231
													slc2a1.L	dnmbp.L
													gramd1c.L	vps13d.L
													pitx1.L	slc9a3r1.L
													MGC80416	chm.L
													ccser2.L	lrba
													mtss1.1.S	fdxr.S
													prkaca.S	lrp3.L
													tstd2.S	hectd2.L
													tmprss9	trmu.L
													Xetrov90004873m.L	sec23a.S
													snx31.L	supt3h.L
													dcbld1.L	ddhd1.S
													aim1.L	LOC100158389
													ccdc141.L	nbl1.L
													thap5.S	trim23.L
													pou2f1.S	vwa3a.L
													ccdc169.S	ccni.S
													phox2b.S	ptdss2.S
													LOC108702593	mdm1.L
													mier2.S	slit3
													neurl4.L	LOC108705724
													bves.L	tnik.S
													zfand2a.L	slc25a15
													cml	tmem120b.S
													LOC108700135	dlgap5.L
													slc10a3.S	LOC108720027
													Xelaev18047094m	tbc1d24.1.L
													zc3h3.L	MGC115716
													ctnnbip1.L	peci
													gad1.1.L	cers3.S
													esco1.L	ccdc34.S
													otx1.S	osbpl3.L
													kctd12.L	idi1.L
													ankrd13c.L	rnf14.5.S
													nasp.S	phldb3.S
													adam33.S	kif16b
													lrig3.L	ttc39b.S
													pax3.L	mtmr14.S
													ephb3.L	rab27b.S
													Xelaev18003021m	c9orf3.L
													znf503	sema3a.L
													enc1.2.S	pak3.S
													tnfsf11.S	LOC108698206
													shox	LOC108696301
													Xelaev18034023m	ghr.L
													garem1.L	tor1a.L
													pcsk5	uck1.S
													tank.S	dnajb1.L
													klhdc10.L	LOC108719643
													zc3h3	med18.S
													snx10.S	rbsn.L
													flvcr1.L	nfatc3.L
													tmem251.L	hspbap1.L
													kif26a.S	trim3.L
													fzd8.S	rcan1.S
													mix1.S	Xelaev18001443m
													arsa.1.S	fam134c.L
													p4htm.L	mfsd10.L
													fam110b.S	LOC108696306
													aldh1a3.S	mtif2.L
													fhl3.L	tasp1.S
													dph3.L	agbl5.L
													abca8.L	haus3
													n4bp3.S	fam46c.S
													poc5.L	klhl5
													hsp70.L	asphd2.L
													tmprss9.S	mad2l2.S
													pkdcc.1.S	gpm6b.S
													elk4.S	tjp2.S
													ptprr.L	LOC108695585
													has2.L	smim18.S
													tpbg.L	mink1.L
													zic5.L	atp12a
													dop1a	trim7.L
													itprip.L	pgap1.L
													upp2.S	ctbp1.S
													pcdh8.2.S	gde1.L
													thsd7a.L	nhej1.S
													kiaa0895l.L	tmem189.L
													ptprb.L	snx10.L
													gramd1a.S	specc1.L
													atad3a.L	batf3.S
													Xelaev18010896m	osbpl9.S
													galnt18.S	scd.L
													tiprl.L	osbpl8.S
													inf2.L	mib2.L
													LOC100495222.1.L	plekhg1.L
													ednra.L	Xelaev18001309m
													ntn3.S	insrr.S
													sp5.L	MGC84007
													rab21.L	trim7.S
													xarp.L	otud4-like.2.L
													lhx1.L	nedd1.L
													cdk5r2.L	LOC108706865
													zdhhc9.L	acot12.L
													foxd2.S	tecpr1.L
													dact1.L	fgfr3
													aldh1a3.L	wdr47.S
													afap1.S	fancb.L
													tnfsf11.L	trappc10.L
													dnajb14.L	agpat4.L
													Xelaev18023152m	ppm1e.L
													upp2.L	sfrp2.S
													fli1b.L	ank3.S
													bmpr1b.L	ttbk2.L
													chrna4.S	grtp1.S
													stx11.S	kcnip4.L
													msgn1.S	Xelaev18001896m
													apcdd1.S	tmem55a.S
													LOC108698354	phf19.S
													LOC108698417	pla2g4a.L
													LOC108700085	vps50.L
													foxd1.L	grip1.S
													t.L	josd1.L
													znf385b.L	lhx5.L
													spns2.L	nav3.L
													megf6.L	neurl1b.L
													slc4a2.S	tmem57.S
													vegt.L	gtdc1.S
													plekhg5.S	calhm2.L
													hhip.L	gpt2
													otx2.S	c15orf39.S
													map3k19.L	liph.S
													LOC108719533	evi5l.L
													lgr5.S	cxorf57.S
													spry4.S	gcnt3.S
													Xelaev18000337m	lpar6.S
													tmprss4.L	lonrf1.S
													slc41a2.L	aida.S
													ppp2r3a.S	appbp2.S
													pnhd.S	fam210a.S
													vegt.S	vash1.L
													clic1.S	rcan1.L
													adamts18.L	scn1b.S
													loc446281.L	hhla2.S
													fam20b.S	LOC108715416
													tgds.S	reep6.L
													nodal2.L	foxd4l1.1.S
													arg1.L	l2hgdh.L
													gli1.L	lrrc28.L
													casd1.L	paqr8.L
													lhx1.S	gs17.S
													schip1.S	spg11.L
													dmrta2.L	casp10.S
													skor1.S	nell1.S
													nodal1.S	arhgap26.S
													trim63.S	atxn1.S
													ptprj	rabggta.S
													rhcg.L	LOC108711583
													bix2.L	bmp2k.S
													irx3.L	LOC108703769
													skor1.L	slc5a1.2.L
													flt1.S	ceacam21
													klhl24.S	smpdl3a.L
													zic2.L	LOC108703778
													irx3.S	ska2.L
													slc25a46.L	LOC108714398
													scn2b.L	ccdc88a.S
													akap9.S	abhd12.L
													dand5.L	gpc1.S
													dmpk.L	mpst
													LOC108695571	sox18.L
													prdm14.L	eri3.S
													hoxc8.S	st3gal1.S
													LOC108705533	lgmn.S
													LOC108697827	fbxo46.S
													rasl11b.L	arhgap20
													ednra.S	gas2l1.S
													tnfrsf1a.S	gls.L
													dmbx1.L	LOC108706212
													arx.L	MGC80465
													cdc42ep2	nab1.L
													foxe1.S	nid1.S
													spry2.S	dtna.S
													Xelaev18027048m	c10orf35.L
													adamts19.L	ptprm
													hlx	commd2.S
													slc26a4.L	camsap1.L
													abcb1	ada.S
													pax9.L	amh.S
													mmrn2.L	kcnh6
													frzb2.L	calhm2
													adamts1.S	igdcc4.L
													LOC108709763	usp18.L
													nodal1.L	stk11.L
													tbc1d24.2.S	mthfr.S
													arhgef28.S	pla2g4f.L
													admp.S	fam198b.L
													errfi1.L	tpcn2
													plekhg5.L	znf234.L
													pou4f1.L	borcs7.S
													pax3.S	tprn
													otx2.L	ccdc3.L
													sgcb.S	map1lc3c.L
													erbb3.L	sik2.S
													onecut1	rab31.L
													dkk1.L	npnt.S
													onecut2.S	neu1.L
													pou4f1	capn3.L
													homeobox100496651-provi	atp13a4.S
													rgs16.S	trappc8.S
													srrm4	manbal.S
													figf.L	LOC108718446
													gsc.S	ly75.L
													LOC108712674	dmxl2.S
													ppp1r16b.S	slc8a3.L
													cnksr2	cdca7
													lefty.S	pgat.L
													dmbx1.S	Xelaev18003796m
													gsc.L	syt4.S
													spry4.L	Xelaev18024710m
													dkk1.S	racgap1.2.L
													ap4e1.S	mapkapk5.S
													gdf3.S	arid4b.S
													olig4.L	trerf1.L
													fezf1.L	pag1.S
													rorb.L	lpar5.S
														ripor3.S
														tpcn1
														ccdc53.L
														camkk1
														LOC108699896
														spsb3.L
														pknox2.L
														acad11.L
														kiaa0513.L
														tmem266.L
														sox18.S
														LOC108698338
														serac1.L
														cntn4.L
														kat2b
														gpr137b.L
														dsc3.S
														zfyve28.L
														LOC108711716
														pank3
														MGC68821
														ston2.S
														plekhm3.L
														kcnj5.L
														nlk.L
														alg13.L
														wnk2
														gpr65.L
														LOC108703768
														LOC100036828
														stat6.L
														zyg11b.L
														adcy8.S
														LOC108716797
														prkag1.S
														rgs4.S
														LOC108702944
														znf577.S
														LOC108707871
														homer2.S
														brinp3
														foxh1.S
														LOC108713378
														popdc3.S
														LOC100127287
														clstn2.L
														adamts16.L
														socs3
														chst8.L
														arhgap11a.2.S
														mapk4.S
														garnl3.S
														LOC495407
														socs3.L
														lhfp.S
														LOC108696785
														tmem187.S
