# Supplementary material for: Quantitative analysis of transcriptome dynamics provides novel insights into developmental state transitions
Source: BMC Genomics. 2022 Oct 23;23:723. doi: 10.1186/s12864-022-08953-3 (PMC9588240; doi:10.1186/s12864-022-08953-3)
Supplement: Supplementary file 15 — Additional file 15. Supplemental Table 6. Temporal DESeq Epi Neur Venn Diagram Gene Lists corresponding with Figure 3B. [file 12864_2022_8953_MOESM15_ESM.xlsx]

## Sheet: St9-10
Temporal DESeq Epi Neur Venn Diagram Gene Lists corresponding with Figure 3B
Total				Increase				Decrease
Epi Only	Neur Only	Overlap		Epi Only	Neur Only	Overlap		Epi Only	Neur Only	Overlap
ogdh.L	ventx2.1.L	lmnb1.L		ogdh.L	cpsf3.L	lmnb1.L		Xelaev18036438m	ventx2.1.L	btg3.S
zc3h13.S	ventx2.2.L	smc3.S		zc3h13.S	fubp1.S	smc3.S		ccna1.S	ventx2.2.L	ccnb5.L
akt1s1.S	Xelaev18029627m	hnrnpul2.L		akt1s1.S	smarcd1.S	hnrnpul2.L		zbtb43.L	Xelaev18029627m	LOC108705579
tomm40.S	btg5.1.S	cmas.L		tomm40.S	smc1a.S	cmas.L		fzd1	btg5.1.S	btg5.1.L
usp14.S	ventx2.1.S	phf5a.S		usp14.S	tpp2.L	phf5a.S		Xelaev18037589m	ventx2.1.S	lrrc40.L
tfg.L	admp.L	rnps1.S		tfg.L	hnrnpab.L	rnps1.S		esr-5.S	admp.L	tfrc.L
LOC108709949	bix1.2.L	hnrnpab.S		LOC108709949	hmgb3.S	hnrnpab.S		gpr12	bix1.2.L	znrf1.L
srek1ip1.L	mcidas	xnf7.S		srek1ip1.L	ilf3.S	xnf7.S		enc1.2.S	mcidas	plbd2.L
clta.L	hbp1.S	cpsf6.S		clta.L	magoh.S	cpsf6.S		reep1.L	hbp1.S	cpeb1.S
MGC80893	snph.L	alyref.S		MGC80893	bsg.L	alyref.S		st3gal4.L	snph.L	map4.S
ubr4	foxd4l1.1.L	u2af2.S		ubr4	wdr45b.S	u2af2.S		pced1a.L	foxd4l1.1.L	ikzf2.L
snw1.L	stard13.L	rab10.L		snw1.L	sf3b3.S	rab10.L		Xelaev18016928m	stard13.L	slc39a9-like.1.S
cwc15.S	hs3st1.L	u2af1.L		cwc15.S	rab1a.L	u2af1.L		zfp36l2.1.S	hs3st1.L	cpeb1.L
drap1.L	hdac2.L	srsf4.L		drap1.L	epcam.S	srsf4.L		loc733728.L	hdac2.L	ccdc69.S
eif3a	xzar2	rbm8a.L		eif3a	txnrd3.L	rbm8a.L		cep290.L	xzar2	lefty.S
ddx46.L	hn1.L	sf3b2.S		ddx46.L	h2afz.L	sf3b2.S		zfpm2.L	hn1.L	bix1.1.L
ywhaq.L	c19orf66.L	smarcc1.L		ywhaq.L	actg1.S	smarcc1.L		slc4a1.L	c19orf66.L	btg4.L
thrap3.L	foxd4l1.1.S	hnrnpl.L		thrap3.L	psmc5	hnrnpl.L		sox17b.1.S	foxd4l1.1.S	tfrc.S
hmgb1	slc25a37.S	sec14l1.L		hmgb1	magoh.L	sec14l1.L		mxd4.L	slc25a37.S	hes5_X2.L
dhx15.S	parp15	set.S		dhx15.S	ppp1ca.L	set.S		rbm24.L	parp15	c14orf159.L
acin1.S	nkd1.L	ptma.S		acin1.S	nucks1.S	ptma.S		LOC108717639	nkd1.L	Xetrov90003513m.L
dirc2.S	rrm2b.S	ilf2.L		dirc2.S	sar1a	ilf2.L		pygo1.L	rrm2b.S	dnajc9.L
dnajc7.L	trim14.S	ctbp2.S		dnajc7.L	selt.S	ctbp2.S		anapc10.L	trim14.S	LOC108708333
exosc1.L	nt5dc3.L	hist2h3d.L		exosc1.L	lmnb1.S	hist2h3d.L		tnfrsf19.L	nt5dc3.L	lrmp.L
eif3m.S	fam126a.S	hnrnpc.L		eif3m.S	ddx39	hnrnpc.L		xylt1.S	fam126a.S	nr3c2.L
psmd13.S	gnb1l.L	arf4.S		psmd13.S	lrrc1.S	arf4.S		zdhhc1.L	gnb1l.L	fbxo43.S
dcaf15.S	ndel1.S	sra1.L		dcaf15.S	myl12b.S	sra1.L		trappc13.L	ndel1.S	nhsl1
eif2s1.L	lsm1.S	znf638.L		eif2s1.L	snrnp70.L	znf638.L		h1f0.S	lsm1.S	tmem19.L
sarnp.S	oaz2.S	alyref.L		sarnp.S	pabpc1.S	alyref.L		rpain.S	oaz2.S	akip1
casc3.L	bnc1.S	eif5a.L		casc3.L	eif4a1.L	eif5a.L		fzd1.L	bnc1.S	pcnt.L
nelfcd.L	slc48a1.S	glul.S		nelfcd.L	hdlbp.S	glul.S		tm2d3.S	slc48a1.S	cdca7
cstf2.L	avpr2.S	unkl.L		cstf2.L	anp32e.L	unkl.L		dtl.L	avpr2.S	stil.L
gtf2f1.L	sod2	tpt1.L		gtf2f1.L	cdc42.L	tpt1.L		prr14l	sod2	btg4.S
sec23b.S	sod2.S	ift172.L		sec23b.S	upk1a.L	ift172.L		ankrd37.S	sod2.S	cyr61.L
e2f3.S	baiap2l2.S	prmt1.L		e2f3.S	anp32c.L	prmt1.L		Xelaev18041248m	baiap2l2.S	klhl13.S
dync1i2.S	socs6.L	wdr43.L		dync1i2.S	tomm20.L	wdr43.L		loc100158305.L	socs6.L	ssx2ip.S
cd63.L	crtc2.S	znf605.S		cd63.L	smarcc2.L	znf605.S		mctp2.L	crtc2.S	map3k2.S
nrbp1.L	prdx2.L	hdlbp.L		nrbp1.L	prmt1.S	hdlbp.L		pcmtd1	prdx2.L	fbxo43.L
f11r.L	atn1.S	hmgn2.L		f11r.L	hnrnpa1	hmgn2.L		klf6.S	atn1.S	tmem106b.S
faf1.L	hlx	hnrnph3.L		faf1.L	khdrbs1.S	hnrnph3.L		ikzf2.S	hlx	snrk.S
loc100145527.S	tnfrsf19.S	wee1.S		loc100145527.S	ctbp2l.L	wee1.S		stc1.S	tnfrsf19.S	garem1.L
cbs.L	myo1e	pabpn1.S		cbs.L	hnrnpa2b1.L	pabpn1.S		ubxn2b.L	myo1e	LOC108703747
srrm1.L	dkk1.L	lamc1.S		srrm1.L	hnrnpdl.L	lamc1.S		cemip.L	dkk1.L	akap11.S
dnaja2.L	phlpp2.L	ppp1r10.L		dnaja2.L	luc7l3.L	ppp1r10.L		lig4.L	phlpp2.L	ccdc69.L
sumo3	coq2.L	hmg-17		sumo3	ilf3.L	hmg-17		cdc7.L	coq2.L	oat.1.S
srsf4	klhl26.L	rbm4b.S		srsf4	srsf1.S	rbm4b.S		anapc10.S	klhl26.L	ccna1.L
ralb.S	szl	phc1.S		ralb.S	drap1.S	phc1.S		mgc69520.S	szl	arhgap20.S
gramd1c.L	slc35a1.S	ppp1cb.L		gramd1c.L	hnrnpul2.S	ppp1cb.L		spsb1.L	slc35a1.S	atf6b.S
ewsr1.L	fam110a.S	nuak2.S		ewsr1.L	tmem147.S	nuak2.S		fcho1.L	fam110a.S	usp15.L
eif3h.L	aco2.S	srsf3.S		eif3h.L	srsf1.L	srsf3.S		itga5.S	aco2.S	rdh13.L
cycs.S	bcl6.L	actb.S		cycs.S	myef2.S	actb.S		sh2d4a.S	bcl6.L	LOC108708627
fkbp1a.S	mb21d2.L	ephb3.L		fkbp1a.S	hnrnph1.S	ephb3.L		coq6.L	mb21d2.L	ssx2ip.L
erh.L	mmd.S	cgn.L		erh.L	fzd7.L	cgn.L		adgrg1.L	mmd.S	atf6b.L
serf2	vldlr.L	anp32c.S		serf2	cirbp.S	anp32c.S		ubn1.L	vldlr.L	fhdc1
gramd1c.S	LOC108709443	larp4b.S		gramd1c.S	elavl1.L	larp4b.S		kank1.L	LOC108709443	gmnn.L
rtfdc1.L	tor1a.S	rpl23.S		rtfdc1.L	sertad3.L	rpl23.S		stx11.L	tor1a.S	MGC68639
snrpb.S	tpst2.L	MGC52578		snrpb.S	epcam.L	MGC52578		zfyve1	tpst2.L	intu.S
edf1.L	optn.L	srrt.L		edf1.L	nop56.L	srrt.L		birc7.S	optn.L	map4.L
tmem214.L	spry2.S	MGC115598		tmem214.L	lhx5.S	MGC115598		mxd3.L	spry2.S	elk4.L
ube2l3.L	slc35a1.L	sfpq.S		ube2l3.L	LOC100505446	sfpq.S		usp54	slc35a1.L	rsbn1l.L
fam168a.L	pias2.L	pcf11.S		fam168a.L	itgb1.S	pcf11.S		birc7.L	pias2.L	hs3st1.S
psmb6.L	msantd3.L	mcm6.2.L		psmb6.L	slc25a17.L	mcm6.2.L		pdzd2.L	msantd3.L	jade2.L
bcas2.L	tnfaip8.S	hnrnpu		bcas2.L	LOC108697862	hnrnpu		rsad1.L	tnfaip8.S	pan2.L
rnf113a.S	zdhhc12.L	h4c15		rnf113a.S	dusp11.2.S	h4c15		sirt3.2.L	zdhhc12.L	ppp1r3b.S
nudc.L	acot2.S	rhob.S		nudc.L	leng8.S	rhob.S		wdfy2.S	acot2.S	pcnxl4.L
snd1.L	slc6a16.S	ylpm1.L		snd1.L	stag2.L	ylpm1.L		abhd5.L	slc6a16.S	LOC108718425
usp25.L	fgfr3.L	tra2a.S		usp25.L	upk1b.S	tra2a.S		emilin2.L	fgfr3.L	haus4.L
snrpd3.L	ndel1.L	hnrnpk.L		snrpd3.L	ptbp1.S	hnrnpk.L		snx7.S	ndel1.L	ipp.L
txnl1.S	scnm1.L	cirbp.L		txnl1.S	actg1.L	cirbp.L		ptprh.S	scnm1.L	fibp.L
eif3c.L	adamts8	tra2a.L		eif3c.L	dynll1.S	tra2a.L		LOC108699404	adamts8	rcbtb1.L
tpd52l2.L	tdrd15.L	prpf39.1.S		tpd52l2.L	hmgn3.S	prpf39.1.S		pacrgl.L	tdrd15.L	kiaa0141.S
rab1a.S	chek1.S	lrig3.S		rab1a.S	pvrl2.L	lrig3.S		pcdh18.S	chek1.S	adcy6.L
pdcd6ip.L	lnx2	cdc14b.L		pdcd6ip.L	hif-1a	cdc14b.L		nfkb2.L	lnx2	arhgap20.L
inip.S	ncor2.S	tubb4b.L		inip.S	myef2.L	tubb4b.L		ccnb1.L	ncor2.S	cat.2.L
apex1.L	sun1.L	calr.L		apex1.L	p2ry2.L	calr.L		b3gnt5.S	sun1.L	oxr1
znf207.S	sos1.S	unknown.S		znf207.S	lratd2	unknown.S		nol4l.L	sos1.S	kdm8.L
cs.S	mapkapk2.L	vezf1.S		cs.S	pabpn1.L	vezf1.S		map1lc3c.L	mapkapk2.L	usp33.L
uba1.S	fam149b1.S	hspa8.S		uba1.S	luc7l3.S	hspa8.S		kif11.L	fam149b1.S	trps1.L
eif2s3.S	tmem184a.S	hexim1.L		eif2s3.S	LOC108704307	hexim1.L		zbed1.L	tmem184a.S	hs3st1
COX3	habp4.L	hp1bp3.L		COX3	hnrnpu.S	hp1bp3.L		Xelaev18021540m	habp4.L	serinc2.L
tmed2.L	cdkl5.L	Xelaev18042112m		tmed2.L	atg4d.S	Xelaev18042112m		lgr4.L	cdkl5.L	klf15.2.L
pfdn2.S	trpm7.S	h2ac11		pfdn2.S	hnrnpa1.S	h2ac11		leprot.L	trpm7.S	blm.L
rbm22.S	zpd.L	mcl1.L		rbm22.S	cldn4.L	mcl1.L		c11orf96.L	zpd.L	rspry1.S
kras.S	rp2.S	h3f3b.L		kras.S	sertad3.S	h3f3b.L		zdhhc23.L	rp2.S	LOC100489554.L
atp6v1g1	nadk.S	cpsf1		atp6v1g1	u2af1.S	cpsf1		ntmt1.S	nadk.S	smtn.S
ube2e3.L	ctsc.S	ets2.L		ube2e3.L	dck.2.L	ets2.L		MGC83480	ctsc.S	tm2d2.S
psmc4.L	slc35e2b.L	ckap5.L		psmc4.L	znf585b.S	ckap5.L		MGC147172.L	slc35e2b.L	ndst2.S
stau1.L	aff2.L	hist1h2bj.L		stau1.L	kbtbd7.L	hist1h2bj.L		xrcc6bp1.L	aff2.L	gtf3c2.L
myh10.S	wasll.L	hspa8.L		myh10.S	irs4.L	hspa8.L		LOC108707252	wasll.L	tubg1.L
smarce1.L	aste1.L	h2afx.L		smarce1.L	eif4g1.L	h2afx.L		hhipl1.S	aste1.L	wdr6.L
sf3a1.L	frmd4a	ralb		sf3a1.L	rbmx.L	ralb		myc.S	frmd4a	Xelaev18041239m
jup.L	znf362.S	ptma.L		jup.L	setd2.S	ptma.L		map2k4.S	znf362.S	ppp1r3b.L
psmd1.S	trerf1.S	coq10b.L		psmd1.S	prpf39.1.L	coq10b.L		pgam1.S	trerf1.S	rnf185.L
fscn1.L	klf2.L	irs4.S		fscn1.L	kif11.S	irs4.S		hivep1.S	klf2.L	rbm26.L
tpm3.S	fbxo33.L	ankrd50.L		tpm3.S	ticrr.L	ankrd50.L		kif7.L	fbxo33.L	tpgs1.S
ept1.L	nubp1.S	dusp8.S		ept1.L	plk4.L	dusp8.S		ifngr2.1.L	nubp1.S	cbx4.S
LOC108701478	mos.L	gfpt1.S		LOC108701478	dhx15.L	gfpt1.S		lrp5.L	mos.L	ccng1.S
wasf2.L	alas1.L	trim36.S		wasf2.L	gfpt1.L	trim36.S		poc1a.L	alas1.L	nsl1.L
sec16a.L	lpar6.S	slc25a34.L		sec16a.L	tjp2	slc25a34.L		txnl4b.S	lpar6.S	tor3a.L
hdgf.S	nsmf.S	actb.L		hdgf.S	xbp1.L	actb.L		them6.L	nsmf.S	lrrcc1.L
ppp1ca	ip6k2.S	mlec.S		ppp1ca	slc1a5.S	mlec.S		fastkd1.L	ip6k2.S	wdr20.L
eftud2.S	fam110b.S	rbm14.L		eftud2.S	ncstn.L	rbm14.L		sh2b3.S	fam110b.S	ccdc191.L
uap1l1.L	bambi.L	slc7a3.L		uap1l1.L	Xelaev18025740m	slc7a3.L		znrf1.S	bambi.L	wdr20.S
sap18.S	nck2.S	sgk1.S		sap18.S	larp4b.L	sgk1.S		arid5b-like.1.S	nck2.S	tnfrsf10b.L
sf3a2.L	wasll.S	atf4.L		sf3a2.L	ncstn.S	atf4.L		mbd2.S	wasll.S	loc100491633.L
ppm1g.S	spdyc.L	cdk9.L		ppm1g.S	sp1.L	cdk9.L		pcdh20.S	spdyc.L	phf19.S
gripap1.S	mrps30.S	pars2.L		gripap1.S	e2f7.L	pars2.L		sept9.S	mrps30.S	mylip.S
arf4	rhov.S	LOC108717645		arf4	g2e3.L	LOC108717645		e2f1.L	rhov.S	loc100145576.L
ociad2.L	apcdd1.L	esco2		ociad2.L	sf3b5.S	esco2		ccdc71l.S	apcdd1.L	retreg3
ube2m.S	cct4.L	e2f7.S		ube2m.S	slc27a3.L	e2f7.S		rhobtb1.L	cct4.L	tmem116.L
ubr4.S	kmt2a	angpt4.S		ubr4.S	ubtf.L	angpt4.S		dnajc16.L	kmt2a	ect2.S
gtf2e1.L	cxcr4.S	faxc.L		gtf2e1.L	mcm6.2.S	faxc.L		pcmtd2.S	cxcr4.S	znrf3.L
h3f3c.L	LOC108705257	rnf38.L		h3f3c.L	LOC108715080	rnf38.L		mtmr8	LOC108705257	golga5.L
krtcap3.L	foxi4.2.L	kiaa0232.L		krtcap3.L	gatad2a.L	kiaa0232.L		insm1.S	foxi4.2.L	cenpl.S
crnkl1.S	Xelaev18030446m	ins		crnkl1.S	sp1.S	ins		ldlrad4.S	Xelaev18030446m	zar1l.S
ewsr1.S	lmo4.2.S	hist1h4d.L		ewsr1.S	nuak2.L	hist1h4d.L		ctsc.L	lmo4.2.S	nt5dc3.S
anp32a.L	spry2.L	sfpq.L		anp32a.L	grx5	sfpq.L		LOC108706498	spry2.L	bmp2.S
cyfip1.L	nr2c1.L	d17h6s53e		cyfip1.L	rbm5.L	d17h6s53e		kank1.S	nr2c1.L	kctd9.S
rprd1a.S	rasa3.L	lrp6		rprd1a.S	rap2b.S	lrp6		fbxo30.S	rasa3.L	ndrg4.S
qki.S	stmn1.S	asna1.L		qki.S	wdr83os.L	asna1.L		elmod2.L	stmn1.S	sik2.L
rpl18.S	ung.L	sall3.L		rpl18.S	chst7.S	sall3.L		enpp2	ung.L	prmt5.L
eif3m.L	c16orf46	srsf7.S		eif3m.L	myc.L	srsf7.S		tor2a.L	c16orf46	septin9.L
chtop.L	ube2j2.S	hic2.S		chtop.L	purb.L	hic2.S		prkcz.S	ube2j2.S	LOC108719544
rnf10.S	rbm46.L	eef1a1o.S		rnf10.S	unkl.S	eef1a1o.S		kazn.L	rbm46.L	tada2b.S
smarcd2.L	abhd15.L	abcb9.L		smarcd2.L	plekhg7.S	abcb9.L		tnfsf11.L	abhd15.L	znf81.L
eif1b	vamp7.L	lrp10.S		eif1b	xbp1.S	lrp10.S		nr1h2.L	vamp7.L	rnf149.S
rpl13.S	plin2.S	emc4.L		rpl13.S	LOC108710814	emc4.L		LOC108714466	plin2.S	vegfa.S
mta2.L	ncoa7.L	khdc4		mta2.L	rabgap1l.L	khdc4		cdyl2.S	ncoa7.L	gramd2b.S
psma7.L	ndrg4.L	LOC108695577		psma7.L	ufc1.S	LOC108695577		spdl1.L	ndrg4.L	bnc1.L
ube2e3.S	dap.L	rab40c.L		ube2e3.S	hal.1.L	rab40c.L		irf2bpl.S	dap.L	rnf185.S
pcbp2.L	cmip.S	hspbp1.L		pcbp2.L	mob2.1.L	hspbp1.L		slc25a37.L	cmip.S	uhrf2.L
qtrtd1.L	bod1.L	mfsd11.L		qtrtd1.L	ccne2.L	mfsd11.L		prdm2.L	bod1.L	tmem171.L
pno1.L	josd1.L	notch1.L		pno1.L	krasl.S	notch1.L		tmem185a.S	josd1.L	cables1.S
MGC84691	hells.S	ppp1r10.S		MGC84691	znf740.L	ppp1r10.S		rbm38.S	hells.S	fbxw2.S
COX2	adrb3.L	hdgf.L		COX2	ptbp1.L	hdgf.L		ect2.L	adrb3.L	trak1
h3-5.L	bambi.S	LOC105945479		h3-5.L	dnajb1.L	LOC105945479		Xelaev18032680m	bambi.S	fam63b.L
snrpb.L	fam83g.L	LOC108701852		snrpb.L	h2afj.S	LOC108701852		otud3.L	fam83g.L	acox2.L
nop16.L	dusp1.S	cldn4.S		nop16.L	ugcg.S	cldn4.S		glt1d1.L	dusp1.S	adamtsl1
anp32e.S	LOC108695571	zmcm3.L		anp32e.S	lbr.S	zmcm3.L		ift80.L	LOC108695571	sdhd.L
cttn	LOC108712538	znf91		cttn	znf106.L	znf91		tbc1d31.L	LOC108712538	zfpm1
gng5.S	saysd1.L	btg1.L		gng5.S	c6orf62.S	btg1.L		LOC108718785	saysd1.L	irf2.L
ube2d4.L	lrch1.S	eef1a1.L		ube2d4.L	skil.S	eef1a1.L		cerk.S	lrch1.S	zfp36l2.2.L
rbm8a.S	arap1	Xelaev18023727m		rbm8a.S	rbmx.S	Xelaev18023727m		socs2.S	arap1	dnajb9.S
snrpc.S	abhd13.S	LOC108702825		snrpc.S	dusp6.L	LOC108702825		kbtbd3	abhd13.S	nfe2l2.S
rpl18.L	cep55-like.L	chkb.S		rpl18.L	ptafr.L	chkb.S		atp6v0a2.L	cep55-like.L	akap11.L
ranbp1.S	fntb.L	lhx5.L		ranbp1.S	zswim4.L	lhx5.L		dnmt1.S	fntb.L	fut11.L
cpsf6.L	slc25a10.L	hes4.L		cpsf6.L	e2f3.L	hes4.L		mbd4.L	slc25a10.L	lrriq1.L
sap18.L	tbk1.L	ago2.L		sap18.L	LOC495489	ago2.L		MGC83673	tbk1.L	arhgap33.S
pelp1.L	ccnb2.S	LOC100127323		pelp1.L	rfx2.L	LOC100127323		eif2ak3.S	ccnb2.S	rsbn1l.S
psmc5.L	macc1.L	lrig3.L		psmc5.L	gsk3a.S	lrig3.L		fam89a.S	macc1.L	klhl13.L
rps20.S	frmd4b.L	sowahc.L		rps20.S	loc100494818.L	sowahc.L		arhgap28.L	frmd4b.L	znf628.L
asun.S	arid5b.L	ldlr.L		asun.S	rbm15.S	ldlr.L		zgrf1	arid5b.L	uspl1.S
sat1.S	commd9	LOC108714950		sat1.S	tm9sf3.S	LOC108714950		gpr137b.L	commd9	ing1.L
hmgn3.L	dusp1.L	tp53inp1.L		hmgn3.L	tomm70a.S	tp53inp1.L		larp6-like.1.L	dusp1.L	e2f1.S
rps8.S	kifc3.S	rab26.L		rps8.S	emp2.S	rab26.L		abo.2.L	kifc3.S	ring1.S
adar.S	lpcat2.S	fam109b.L		adar.S	LOC108698063	fam109b.L		etv3l.S	lpcat2.S	slc18a2.L
cherp.L	clic1.L	rhob.L		cherp.L	ier2.S	rhob.L		csrnp1.S	clic1.L	kiaa1715.L
fxyd3	spen	map3k1.S		fxyd3	ctps1.S	map3k1.S		tacc3.S	spen	lfng.S
bop1.L	cdc37l1.L	rnd1.S		bop1.L	midn.L	rnd1.S		dip2b	cdc37l1.L	bcor.L
rps13.S	noct.S	tsc1.S		rps13.S	rdh10.L	tsc1.S		trabd.L	noct.S	znf367.S
nelfb.L	ifnar2.S	LOC108713945		nelfb.L	cnn1.S	LOC108713945		zak.L	ifnar2.S	wdr77.S
plcd1.S	zer1.L	LOC108709818		plcd1.S	loc108715171.S	LOC108709818		MGC98819	zer1.L	fam21a.L
ssbp3.L	ing3.L	LOC108718087		ssbp3.L	timm17a.S	LOC108718087		fbp2.L	ing3.L	tfeb.S
hsp90ab1.S	lpar6.L	Xelaev18003910m		hsp90ab1.S	e2f8.L	Xelaev18003910m		fut11.S	lpar6.L	arf3.S
caprin1.L	cdk5r2.S	evpl.L		caprin1.L	farp2.S	evpl.L		scnn1g.S	cdk5r2.S	etaa1.L
ubqln4.L	smad2.L	rnf135.L		ubqln4.L	slc35a2.S	rnf135.L		cd59-like.L	smad2.L	disp1.L
carm1.L	chmp7.L	LOC108698884		carm1.L	pop7.S	LOC108698884		cfap97.L	chmp7.L	gtf2ird2b
sec61a1.S	bach1.L	hist1h3g.L		sec61a1.S	Xelaev18022211m	hist1h3g.L		dock7.L	bach1.L	crtc2.L
rps29.S	znf436	sgk1.L		rps29.S	LOC108700281	sgk1.L		usp33.S	znf436	cyld.S
spint2.S	ube2j2.L	rfng.L		spint2.S	srsf10.L	rfng.L		rcan3.L	ube2j2.L	garem1.S
hnrnpll	klf4.L	ppt1.S		hnrnpll	LOC108719518	ppt1.S		ttc39a.L	klf4.L	tpgs1.L
rpl31.L	atf7.L	lrp10.L		rpl31.L	aurkb.L	lrp10.L		pcmtd1.S	atf7.L	c1orf116.L
map3k15.L	zbtb16.S	crebzf.S		map3k15.L	brd2.S	crebzf.S		smad2.S	zbtb16.S	rab5d.L
bag6.L	slc30a6.L	rhebl1.S		bag6.L	meis3.S	rhebl1.S		pex6.S	slc30a6.L	LOC108705790
ctr9.L	LOC108698533	pou5f3.2.S		ctr9.L	tat.S	pou5f3.2.S		fam69b.L	LOC108698533	tmem117.S
smarce1.S	aldh2.L	sall4.L		smarce1.S	LOC108719510	sall4.L		tubgcp4.L	aldh2.L	pkd1.L
fam32a.L	arhgap20	dusp5.S		fam32a.L	c15orf39.S	dusp5.S		LOC108700788	arhgap20	plch1
nop10.S	thumpd3.L	pgbd4		nop10.S	cox18.L	pgbd4		fkrp.L	thumpd3.L	leprot.S
snrnp200.S	pot1.L	LOC108706318		snrnp200.S	sox11.S	LOC108706318		foxn4.S	pot1.L	jade1.S
ppia.L	tanc2	LOC108716538		ppia.L	b4galt5.S	LOC108716538		ahsa1.L	tanc2	mecr.S
glul.L	bri3.L	sall1.L		glul.L	hpgd.L	sall1.L		snx25.L	bri3.L	simc1.L
rps19.S	ppp1r21.L	atg16l1.S		rps19.S	Xelaev18024228m	atg16l1.S		fbxo31.L	ppp1r21.L	rab11fip1.S
prpf8.S	mid1.L	btg2.S		prpf8.S	h1fx.S	btg2.S		slc15a4.L	mid1.L	evc2.L
mfap1.L	fam63b.S	mypop.S		mfap1.L	cpne3.L	mypop.S		arv1.L	fam63b.S	nhlrc3.S
fam103a1.L	hbp1.L	LOC108711538		fam103a1.L	itpka	LOC108711538		prpsap2.L	hbp1.L	dnajb9.L
rpl7a.L	clns1a.L	mab21l1.S		rpl7a.L	LOC108719535	mab21l1.S		orc1.L	clns1a.L	katnbl1.L
smarcc1.S	sys1.L	cebpd.S		smarcc1.S	LOC108720027	cebpd.S		rgs3.S	sys1.L	limk1.L
eif3f.S	lats1.S	LOC108719085		eif3f.S	m6pr.L	LOC108719085		nbeal2.S	lats1.S	pif1.L
bag6.S	c6orf120.L	rbl1.S		bag6.S	hspa2.L	rbl1.S		smad9.L	c6orf120.L	LOC108714398
pmpca.S	id2.L	gadd45g.L		pmpca.S	LOC108696875	gadd45g.L		chd1.S	id2.L	fdft1.S
dido1.L	atp13a1.L	zfp36.L		dido1.L	zc3h10.S	zfp36.L		rgs12.L	atp13a1.L	slc25a43.L
rpf1.L	tmcc1.S	nuak1		rpf1.L	bmi1.L	nuak1		msantd3.S	tmcc1.S	dtl.S
snrpf.S	pias3.L	awat1.L		snrpf.S	arrdc3.S	awat1.L		LOC108703834	pias3.L	fam8a1.L
add3.L	peli1.S	xicl		add3.L	LOC108700571	xicl		evi5.S	peli1.S	mlh1.S
pcbp3.L	cse1l.L	rbl1.L		pcbp3.L	sox9.S	rbl1.L		LOC108704241	cse1l.L	soga1.L
rps3a.S	atxn7l1.L	fam46a.L		rps3a.S	h3c7	fam46a.L		dock4	atxn7l1.L	slc8b1.S
zyx.S	cse1l.S	LOC108718942		zyx.S	upk2.S	LOC108718942		nr3c1.L	cse1l.S	plxnb3.S
zc3hav1l	mfsd6l.S	pdk4.S		zc3hav1l	LOC108703765	pdk4.S		enpp2.L	mfsd6l.S	aco2.L
smarca4.S	rgma.L	LOC108704294		smarca4.S	tfap2c.L	LOC108704294		coq10a.S	rgma.L	vldlr.S
skiv2l.L	slc35a5.L	ep300.S		skiv2l.L	LOC100191026	ep300.S		lpcat1.S	slc35a5.L	bbs9.L
supt5h.S	gigyf2.S	tmem127.S		supt5h.S	efna4.L	tmem127.S		lss.S	gigyf2.S	map7d3.L
eif3a.L	dlc1.S	litaf.L		eif3a.L	gas2l1.S	litaf.L		irf2bp2.L	dlc1.S	kiaa1958
anxa7.L	palb2.L	junb.S		anxa7.L	acvr1b.L	junb.S		chsy1.S	palb2.L	plch2
kifc3.L	zcchc14.S	ets2.S		kifc3.L	hsp70.L	ets2.S		strbp.L	zcchc14.S	tmem259.L
sec61b.L	sept8.L	LOC108695579		sec61b.L	fbxo5.L	LOC108695579		fam13a.S	sept8.L	tnfrsf10b.S
sf1.S	pomgnt2.L	Xelaev18005946m		sf1.S	Xelaev18000460m	Xelaev18005946m		tdp2.S	pomgnt2.L	senp7.L
cwc25.L	avpi1.S	LOC108716539		cwc25.L	mpzl1.L	LOC108716539		mpp5	avpi1.S	plxnb3
elob	nfkbil1.L	LOC108696061		elob	ptgs2.S	LOC108696061		rad1.L	nfkbil1.L	med13l.L
c15orf39.L	mycl.S	xetrov90011961m.S		c15orf39.L	tuba3c.S	xetrov90011961m.S		tmem251.L	mycl.S	ptpn3.S
srsf5.S	zfyve9.S	zfp36l2.S		srsf5.S	upk3b.L	zfp36l2.S		ccng2.L	zfyve9.S	hs6st1.L
rps26.S	usf3.S	Xelaev18000217m		rps26.S	slc38a2.L	Xelaev18000217m		vps26b.L	usf3.S	fbxo30.L
rtn4.S	ccpg1.L	srsf7.L		rtn4.S	relt.L	srsf7.L		rfx5.S	ccpg1.L	lats2.S
azin1.S	LOC108719634	fam122b.L		azin1.S	muc5b	fam122b.L		MGC86530	LOC108719634	atf5.2.S
gtpbp4.L	Xelaev18028029m	ep300.L		gtpbp4.L	tmem79.S	ep300.L		mpv17l2.L	Xelaev18028029m	nr3c2.S
Xelaev18030249m	cry4.L	tubb2b.L		Xelaev18030249m	stk38l.L	tubb2b.L		mecp2.S	cry4.L	tubgcp3.L
rps5.L	fam69a.L	znf703.L		rps5.L	mief2.L	znf703.L		cnot8.S	fam69a.L	dok1.L
rps7	spryd3.S	rhebl1.L		rps7	sall1	rhebl1.L		plekho1.L	spryd3.S	pgam1.L
pkp2.L	terf2.S	prickle1.L		pkp2.L	LOC108704304	prickle1.L		cep112	terf2.S	rpap1.S
bop1.S	cog3.S	LOC100191024		bop1.S	LOC108698488	LOC100191024		syne2.2.S	cog3.S	adgrg1.S
Xelaev18003734m	zmynd8.L	hist2h2ab.S		Xelaev18003734m	LOC108703763	hist2h2ab.S		mllt1.L	zmynd8.L	klhl17.L
atp1a1.L	znf462.L	slc2a1.S		atp1a1.L	gs17.S	slc2a1.S		tmem128.S	znf462.L	gpr75.S
krt8.S	pik3cb.L	grhl3.S		krt8.S	cfap52.L	grhl3.S		ccser2.L	pik3cb.L	orc4.L
son	gpi.L	rbm12.L		son	ier2.L	rbm12.L		hspa13.L	gpi.L	cables1.L
fus.L	blcap.L	LOC108697295		fus.L	LOC108715301	LOC108697295		mtbp.S	blcap.L	c10orf2.L
spint2.L	rhov.L	Xelaev18014048m		spint2.L	slc16a3	Xelaev18014048m		tmem143.S	rhov.L	slc7a6os.L
cad.L	ppp2r2d	prkcd		cad.L	LOC494849	prkcd		hps6.L	ppp2r2d	rad17.L
parp1.L	ndc1.S	ago2		parp1.L	LOC108705274	ago2		cep104.S	ndc1.S	arhgap11a.2.L
tceb2.L	pnrc2.L	Xelaev18003021m		tceb2.L	adrb2.S	Xelaev18003021m		ankrd12.L	pnrc2.L	rnf103.L
khsrp.S	arhgef7.L	LOC108710017		khsrp.S	ier5l.L	LOC108710017		aggf1.L	arhgef7.L	b9d2.L
ube3b.S	cers5.L	LOC108717642		ube3b.S	mlec.L	LOC108717642		kcnj5.L	cers5.L	piezo1.S
xpc.L	rai1.L	vav2.L		xpc.L	LOC108705671	vav2.L		mex3d.L	rai1.L	kif13a
rpl7.L	dtna.L	Xelaev18021693m		rpl7.L	arrdc3.L	Xelaev18021693m		fbxw9.S	dtna.L	irf2.S
mzt1.S	sepsecs.L	ras-dva1.L		mzt1.S	akap12.S	ras-dva1.L		MGC52683	sepsecs.L	map7d2
fundc1.S	pak7.L	LOC108718254		fundc1.S	fam110c.S	LOC108718254		atf7ip.S	pak7.L	psen2.S
vapb.L	fasn.L	LOC108695506		vapb.L	mplkip	LOC108695506		gtf2h2.S	fasn.L	zar1l.L
gldc.S	morf4l1.S	gpr143.L		gldc.S	cebpd.L	gpr143.L		epb41l4b.S	morf4l1.S	rspry1.L
nop10	usp49.S	plekhg3.L		nop10	LOC108705687	plekhg3.L		bbs1.L	usp49.S	aktip.S
mfge8.L	tmem169.L	LOC100495010.S		mfge8.L	ccnf.L	LOC100495010.S		rxrg.L	tmem169.L	tmem181.L
rps4	Xelaev18033527m	LOC108708228		rps4	btbd6.L	LOC108708228		brip1.L	Xelaev18033527m	ddit4.S
ubb.L	tmem214.S	sptbn5.L		ubb.L	Xelaev18025314m	sptbn5.L		uhrf1bp1l.L	tmem214.S	lbh.L
elovl7.L	nsmaf.L	ttbk1.S		elovl7.L	klf11.L	ttbk1.S		mis18bp1b	nsmaf.L	clcc1
rpl37a.L	dnajb12.S	irx2.L		rpl37a.L	gpr4.S	irx2.L		rnaseh1.L	dnajb12.S	apex2.L
tmem111.L	traf4.L	znf101		tmem111.L	lrig2.L	znf101		loc100216027.L	traf4.L	depdc7.S
ndufc2.S	cskmt.L	gadd45g.S		ndufc2.S	prrt1.L	gadd45g.S		fdxacb1.L	cskmt.L	fam104a.S
ano5.L	slc9a1.S	cyb561.L		ano5.L	znf653.L	cyb561.L		tdgf1.1.L	slc9a1.S	MGC84185
hp1bp3.S	gmnn.S	sox2.L		hp1bp3.S	cdk1.S	sox2.L		ccs.L	gmnn.S	LOC108718134
mdk.L	arhgef7.S	Xelaev18026162m		mdk.L	sox4.S	Xelaev18026162m		zbtb5.L	arhgef7.S	sema4d
znf845	wdr45.S	LOC108695513		znf845	otud1.L	LOC108695513		ccdc107	wdr45.S	LOC108709286
sf3a2.S	asphd2.L	alcam.L		sf3a2.S	neurog2.L	alcam.L		arhgap11a.2.S	asphd2.L	sertad2.L
nol6.L	mrps16.L	dennd3.L		nol6.L	gtf3c3.S	dennd3.L		baz1a.S	mrps16.L	ndst2.L
casc3.S	grb10.L	znf462.S		casc3.S	LOC108699475	znf462.S		gxylt1.L	grb10.L	zdbf2-like.L
rps27a.S	eea1.S	LOC108709654		rps27a.S	egln3.L	LOC108709654		lats2.L	eea1.S	prkcsh.L
srsf2.S	exoc2.L	kirrel2.L		srsf2.S	gnb3.L	kirrel2.L		tbpl1.L	exoc2.L	espl1.L
rps29	grhl1.S	junb.L		rps29	MGC80567	junb.L		irs1.S	grhl1.S	ints6.L
pdrg1.S	arl10b.S	hist2h2ab.L		pdrg1.S	ckap4.S	hist2h2ab.L		snx16.S	arl10b.S	rab20.L
hnrnpa0.L	nckipsd.L	loxl1.L		hnrnpa0.L	ing4.L	loxl1.L		rasef	nckipsd.L	txndc9.L
rpl17.L	fignl1.L	zswim5		rpl17.L	LOC108711832	zswim5		dact1.S	fignl1.L	tbp.S
pbrm1.L	bbs5.L	fgd1.S		pbrm1.L	fam43a.S	fgd1.S		sprtn.S	bbs5.L	clns1a
srrm2	rfx3.L	hnrnpr.L		srrm2	notch3.L	hnrnpr.L		LOC108703781	rfx3.L	ikzf4.S
capzb.L	ankrd13a.L	Xelaev18032628m		capzb.L	rbm5.S	Xelaev18032628m		mgat3.L	ankrd13a.L	mcm10.L
birc2.S	mcm6.L	prom1.L		birc2.S	stard10.L	prom1.L		loc100493164.L	mcm6.L	lmo4.2.L
MGC83421	taf5l.L	zfp36l2.L		MGC83421	slc18a2	zfp36l2.L		errfi1.S	taf5l.L	ammecr1l.L
Xelaev18046288m	lgr4.S	LOC108704423		Xelaev18046288m	LOC108706094	LOC108704423		fam134a.S	lgr4.S	paxip1.S
rpl17.S	tnfaip8.L	socs1.S		rpl17.S	zbtb10.S	socs1.S		pik3r3.L	tnfaip8.L	LOC108716761
srcap.L	usp22.S	pcdha13.L		srcap.L	LOC108716428	pcdha13.L		rnf44.S	usp22.S	sertad2.S
arl13b.L	ormdl1.S	timp-1.L		arl13b.L	LOC733379	timp-1.L		esyt3.S	ormdl1.S	sec24b.S
fam110c.L	xpo4.S	slc35d2		fam110c.L	pvrl1-like.2.L	slc35d2		iffo2	xpo4.S	cbwd1.1.L
hist2h3c.L	cenpi.L	socs4.L		hist2h3c.L	terc.L	socs4.L		tshz3.S	cenpi.L	pms2.L
mtx1.S	smpdl3a.L	Xelaev18023726m		mtx1.S	gpr161	Xelaev18023726m		klhl15.L	smpdl3a.L	tanc1-like.L
nup188.S	phlpp1.L	syn1.L		nup188.S	krt.S	syn1.L		paqr3.L	phlpp1.L	znf318.S
tkt.L	kiaa1191.L	LOC108698739		tkt.L	aldh1l1.L	LOC108698739		tfap4.L	kiaa1191.L	sun1.S
utp15.S	spag5	pcdh7.S		utp15.S	LOC108718018	pcdh7.S		fbxo11.S	spag5	trim2.L
rpf1.S	pigg.S	smad4.1.L		rpf1.S	fbxl20.S	smad4.1.L		map11	pigg.S	ints6.S
hmgb2.S	gpank1.L	LOC108703754		hmgb2.S	LOC108705992	LOC108703754		scai	gpank1.L	bmp2.L
arl5c.L	ccdc130.L	akap12.L		arl5c.L	bicd1	akap12.L		LOC108705825	ccdc130.L	ccdc171
rpl17-c18orf32	Xelaev18031390m	sdc4.L		rpl17-c18orf32	elf1.L	sdc4.L		topaz1.L	Xelaev18031390m	crls1.S
rps2.L	c5orf24.L	wnt5b.L		rps2.L	chst2.L	wnt5b.L		ncoa6.L	c5orf24.L	arf6.L
taf12.S	ints12.L	klf9.L		taf12.S	asb2.S	klf9.L		cenpj.L	ints12.L	rabgef1
osbpl2.L	e2f4.S	pdk4.L		osbpl2.L	lsm14b.L	pdk4.L		kiaa2026.S	e2f4.S	dnmt1.L
ND5	hlcs.L	top2b.L		ND5	Xelaev18007686m	top2b.L		wdr37.S	hlcs.L	acap3.S
cpsf1.L	slc4a11.S	Xelaev18011097m		cpsf1.L	mab21l2.L	Xelaev18011097m		edc3.L	slc4a11.S	ythdc2.L
bola2.L	f2rl1.L	LOC108701822		bola2.L	htra1.S	LOC108701822		zcchc14.L	f2rl1.L	mfsd14a.S
nsep1	zdhhc3.L	LOC108698564		nsep1	znf268.L	LOC108698564		MGC81163	zdhhc3.L	pde8a
bcorl1.S	LOC397846	sh2d3c.L		bcorl1.S	sox1.S	sh2d3c.L		prex1.L	LOC397846	frmd4a.L
dusp6.S	mief1.S	LOC108699863		dusp6.S	LOC108705674	LOC108699863		rnf169.S	mief1.S	syap1.S
xvent-2b	orc2.S	plekhn1.L		xvent-2b	LOC108704568	plekhn1.L		zrsr2.L	orc2.S	LOC108711716
noc4l.S	klhl32.L	LOC108719547		noc4l.S	MGC68910	LOC108719547		LOC397949	klhl32.L	atxn7l1.S
sbno1.L	cep57l1.L	LOC108715368		sbno1.L	cldn23	LOC108715368		fam219b.L	cep57l1.L	tbc1d9
ubc.L	rhbdf2.L	slc16a12.S		ubc.L	gprc5c.L	slc16a12.S		pex12.L	rhbdf2.L	idh3a.L
mvp.L	pcyox1l.L	celsr1		mvp.L	LOC108698759	celsr1		ube2s.L	pcyox1l.L	rin3.L
zic1.L	otud4.L	mn1.L		zic1.L	pou5f3.1.S	mn1.L		bcl2l14.S	otud4.L	camsap1.L
maff.L	ttc9.L	Xelaev18003796m		maff.L	ccnb3.S	Xelaev18003796m		plekhg4.S	ttc9.L	hhipl1.L
map3k1.L	cox5b.2.L	gas2l1.L		map3k1.L	MGC82975	gas2l1.L		LOC108708239	cox5b.2.L	dync1li2.S
ube2d1.L	thap1	nradd.L		ube2d1.L	fbxl14.L	nradd.L		vmac.L	thap1	ppargc1b.L
znf740.S	tspan33.L	wee2a		znf740.S	LOC108705792	wee2a		d2hgdh.S	tspan33.L	ksr1.L
sox15.L	kif3a.S	fblim1.L		sox15.L	zswim4.S	fblim1.L		cidec.S	kif3a.S	adh5.L
fdps.L	sys1.S	tfcp2l1.L		fdps.L	cdknx.L	tfcp2l1.L		lmo4.1.S	sys1.S	gtpbp6.S
isg20l2.S	c3orf17.L	fam193a.L		isg20l2.S	hexim1.S	fam193a.L		ccdc126.S	c3orf17.L	ncoa6.S
stc1.L	cep170.S	znf451		stc1.L	LOC108703833	znf451		lzts2.L	cep170.S	rassf3.S
dzip1.L	cep97.L	znf703.S		dzip1.L	Xelaev18012386m	znf703.S		btg3.L	cep97.L	atad3a.S
mat2a.S	znf554.L	lgals3.S		mat2a.S	klf10.S	lgals3.S		rab12.S	znf554.L	trappc13.S
LOC108695511	mkln1.S	hhip.L		LOC108695511	hist1h2ad.1	hhip.L		sema4g.L	mkln1.S	LOC108704278
hmgn1.S	mga.L	LOC108719533		hmgn1.S	vgll4l.L	LOC108719533		clspn.S	mga.L	tlcd2.L
LOC108695519	ankrd11.L	LOC108700779		LOC108695519	msx1.L	LOC108700779		cmtm7.S	ankrd11.L	dock9
tgif2.S	lin9.S	fgfr2.L		tgif2.S	pjvk.S	fgfr2.L		exoc8.S	lin9.S	uspl1-like.L
fth1a	gpsm2.L	LOC108698487		fth1a	klf10.L	LOC108698487		ca12.L	gpsm2.L	oxr1.S
LOC108719517	anapc5.L	LOC108700186		LOC108719517	hes1.S	LOC108700186		Xelaev18011044m	anapc5.L	mau2.S
fam174b.L	mfsd13a.S	cdc25b.S		fam174b.L	fzd8.S	cdc25b.S		ralgapb.L	mfsd13a.S	arhgap40.S
tnk2l.S	ddx3x.S	pabpc4.L		tnk2l.S	mypop	pabpc4.L		fzr1.L	ddx3x.S	atg4a.S
ca14.L	arhgap32.S	hist1h1t		ca14.L	LOC108715937	hist1h1t		cdc45.L	arhgap32.S	adamts6
sh3bp4.S	syvn1.L	pcdh19		sh3bp4.S	hunk.S	pcdh19		brf2.S	syvn1.L	brd1.S
srsf2.L	pcyt1a.S	ervfrd-1		srsf2.L	LOC108705673	ervfrd-1		oat.1.L	pcyt1a.S	gsap.L
tcf7l1.L	emc8.S	cyp27a1		tcf7l1.L	fth1.S	cyp27a1		dact3.S	emc8.S	n4bp3.S
rnd3.L	mal2.S	tmpo		rnd3.L	jag1.L	tmpo		anln-like.1.L	mal2.S	golga5.S
prss8	rab11fip5.L	cbarp.L		prss8	LOC108696788	cbarp.L		usp12.S	rab11fip5.L	zfpm1.S
scube2.L	rab8a.S	c2cd2.S		scube2.L	LOC108710290	c2cd2.S		snap47.L	rab8a.S	hells.L
Xelaev18033924m	opa1.S	prdm15.S		Xelaev18033924m	eif4a2.L	prdm15.S		mia3	opa1.S	eme1.L
tgif2.L	pan3.S	gfod1		tgif2.L	Xelaev18003044m	gfod1		alg1.L	pan3.S	mb21d2.S
epha2.L	b4gat1.L	Xelaev18029313m		epha2.L	Xelaev18008693m	Xelaev18029313m		tada3.S	b4gat1.L	ippk.S
Xelaev18006061m	nbeal1.L	phldb3.S		Xelaev18006061m	LOC108704127	phldb3.S		csgalnact2.L	nbeal1.L	pttg1ip.2.L
LOC108719529	tmed9.L	LOC108709393		LOC108719529	ldlr.S	LOC108709393		tmem64.L	tmed9.L	gtf3c1.L
msto1.L	kif18a.L	hap1.L		msto1.L	lin28a.S	hap1.L		ccnl2.S	kif18a.L	sipa1l3.S
ctc1	maea.S	zswim5.S		ctc1	trpv6	zswim5.S		ing2.S	maea.S	cnppd1.L
ralgds.S	znf319.S	tead4.S		ralgds.S	olig2.L	tead4.S		Xelaev18041850m	znf319.S	tlcd2.S
znf721	dgkq.L	Xelaev18005310m		znf721	cldn5.L	Xelaev18005310m		fndc3a.S	dgkq.L	dnajb14.S
napb	rubcn.L	proser1.S		napb	abcb1	proser1.S		LOC108703749	rubcn.L	mtus1.L
vmn2r26	dyrk3.S	pnpla2.L		vmn2r26	Xelaev18018970m	pnpla2.L		irs2	dyrk3.S	cnksr2.L
dpysl2.L	ppp1r3c.2.L	LOC108703375		dpysl2.L	fos.S	LOC108703375		tnks2.S	ppp1r3c.2.L	zbtb5.S
erbb3.S	fut8.S	LOC108717924		erbb3.S	fos.L	LOC108717924		LOC495407	fut8.S	mapk1.S
rgcc.L	ints14.S	myo9a		rgcc.L	mars2	myo9a		sft2d3.S	ints14.S	ttc8.L
fth1.L	cyp27c1.S	txnip.L		fth1.L	pcdha13.S	txnip.L		Xelaev18028646m	cyp27c1.S	rsbn1.L
LOC101734999.S	LOC108704199	kiaa0232.S		LOC101734999.S	Xetrov90002989m.S	kiaa0232.S		h1foo.S	LOC108704199	prmt5.S
dleu7.L	pdf.S	sh3bp4.L		dleu7.L	pkn2	sh3bp4.L		ring1.L	pdf.S	casp9.S
1a11.L	pex10.L	mig30.L		1a11.L	mvp.S	mig30.L		daglb.L	pex10.L	mpi.S
Xelaev18039183m	rassf3.L	plekhn1.S		Xelaev18039183m	Xelaev18013159m	plekhn1.S		tmem243.L	rassf3.L	galnt4.L
zic4.S	phf3.L	Xelaev18022168m		zic4.S	pou5f3.1.L	Xelaev18022168m		tradd.L	phf3.L	wdr60.S
pou5f3.2.L	trim33.L	stat3.2.L		pou5f3.2.L	Xelaev18014773m	stat3.2.L		golph3l.S	trim33.L	klf6.L
alg14.S	aktip.L	prnp.S		alg14.S	usp43	prnp.S		irf9.L	aktip.L	wdr60.L
hapln3.L	klhl7.S	fzd2.S		hapln3.L	hist1h2aj.L	fzd2.S		pi4k2b.S	klhl7.S	dscr3.L
sfrp2.S	anapc7.L	sds.S		sfrp2.S	slc16a6.S	sds.S		orai2.L	anapc7.L	slc35f5.L
trank1.L	rab11fip1.L	parp2.L		trank1.L	Xelaev18009900m	parp2.L		lrp12.S	rab11fip1.L	katnbl1.S
dlx6.S	atp10d.L	galnt7.S		dlx6.S	lhx1.L	galnt7.S		afdn.S	atp10d.L	sertad2
foxd4l1.2.L	rnf19a.L	efnb2.L		foxd4l1.2.L	fat2	efnb2.L		plekhg1.S	rnf19a.L	ccdc186
prelid1.S	tyro3.L	pygm.S		prelid1.S	LOC108719577	pygm.S		kif4a.L	tyro3.L	bahcc1.S
kirrel2.S	usp22 a	kcna3.S		kirrel2.S	LOC108707128	kcna3.S		sphk1.L	usp22 a	med13l.S
LOC108715136	usp6nl.L	LOC108709387		LOC108715136	hes5.2.L	LOC108709387		vps33b.L	usp6nl.L	eif5a.S
kit.L	ubtd1.L	lrrn1.S		kit.L	LOC108700753	lrrn1.S		cenpe.L	ubtd1.L	LOC108718309
LOC108715703	mgat2.L	LOC108719537		LOC108715703	mafb.L	LOC108719537		gtf3c4.L	mgat2.L	def8.L
Xelaev18005230m	aplp2.L	top2b.S		Xelaev18005230m	LOC108715641	top2b.S		tnfsf11.S	aplp2.L	tle4.S
abca1.S	coq10a.L	mxi1.L		abca1.S	LOC108697537	mxi1.L		cpeb4.S	coq10a.L	lrr1.L
rbm45.L	kiaa1671	LOC108695509		rbm45.L	crebl2.L	LOC108695509		zdhhc9.L	kiaa1671	pisd.L
tmem158.S	arhgef16.L	pcdh7.L		tmem158.S	Xelaev18001991m	pcdh7.L		acox3.L	arhgef16.L	cpeb3.S
LOC108719507	plekhf2.L	cks1b.L		LOC108719507	LOC108703840	cks1b.L		zbtb22.S	plekhf2.L	tcirg1.L
rai14.L	aen.L	Xelaev18040126m		rai14.L	cmtm8.L	Xelaev18040126m		irf6.2.L	aen.L	gm29884
LOC108698217	naa25.S	LOC108699904		LOC108698217	foxn4.L	LOC108699904		phldb1	naa25.S	atp10b
LOC108719506	znf335.L	syt10		LOC108719506	hap1.S	syt10		MGC85210	znf335.L	sec24b.L
slc7a5.L	csde1.S	atf3.L		slc7a5.L	kcna3.L	atf3.L		acvr1.S	csde1.S	kiaa2026.L
zic3.L	slc25a36.S	ggt1.L		zic3.L	pcdh8.S	ggt1.L		kiaa1456.L	slc25a36.S	zbed1
frem2	ankrd35.L	azin2.S		frem2	slc18a1	azin2.S		bicd1.L	ankrd35.L	ice1
plk2.L	tgfbrap1.L	akap2.S		plk2.L	Xelaev18036077m	akap2.S		ing2.L	tgfbrap1.L	atf7.S
tiparp.L	plekhm3.L	Xelaev18012294m		tiparp.L	LOC108707159	Xelaev18012294m		pik3r3.S	plekhm3.L	zc3h6
pcdh9.S	dolpp1	ptch2.L		pcdh9.S	Xelaev18000325m	ptch2.L		rnf146.S	dolpp1	josd1.S
slc34a2.L	inpp5b.L	cldn5.S		slc34a2.L	rasgef1b.L	cldn5.S		Xelaev18038799m	inpp5b.L	plcl2.L
arl4c.L	znf319.L	Xelaev18009885m		arl4c.L	alk	Xelaev18009885m		setd1b.L	znf319.L	casd1.L
xk81a1.L	phf3.S	prkx.L		xk81a1.L	khk.S	prkx.L		rnmtl1.L	phf3.S	znf280d.S
muc2	mastl.L	ras-dva1.S		muc2	Xelaev18037263m	ras-dva1.S		trim39.L	mastl.L	vps26b.S
MGC79993	ppp2r1a.L	socs3-like.1.L		MGC79993	znf608.S	socs3-like.1.L		smap2.S	ppp2r1a.L	fam53c.S
wap	cry1.L	LOC105945479.S		wap	LOC108704293	LOC105945479.S		ncoa4.L	cry1.L	wrap73.L
itgb1bp2.L	pik3r2.S	LOC108705810		itgb1bp2.L	fam198b.L	LOC108705810		pxylp1.L	pik3r2.S	gpr63.L
cenpv.L	taok3.S	traf4.S		cenpv.L	caprin2.S	traf4.S		ahctf1.L	taok3.S	npat.S
timp3.S	nol8.L	scube2.S		timp3.S	Xelaev18002950m	scube2.S		dcun1d3.S	nol8.L	ptpn21.L
rbms2.S	mgat2.S	was.S		rbms2.S	eppk1.L	was.S		mapk1.L	mgat2.S	pex11a.L
aim1.S	znf250.S	six1.L		aim1.S	trim29.L	six1.L		furin.L	znf250.S	zdhhc7.S
neurl1b.L	casp2	pkn1.L		neurl1b.L	tbx15.L	pkn1.L		fgfr3	casp2	vegfa.L
tiparp.S	pard3.S	Xelaev18038498m		tiparp.S	pkn1	Xelaev18038498m		cep126	pard3.S	styx.L
gli1.S	lnx1.L	nfkbiz		gli1.S	LOC108705785	nfkbiz		c12orf66.S	lnx1.L	haus8.L
nfkbia.S	nol9.L	Xelaev18000128m		nfkbia.S	ist1	Xelaev18000128m		rab4b.S	nol9.L	znf577.S
pdgfb.L	jak1.L	klf5.L		pdgfb.L	usp43.L	klf5.L		ncor2	jak1.L	foxi2.S
LOC108715416	sestd1.S	Xelaev18022009m		LOC108715416	atf4.S	Xelaev18022009m		rhof.S	sestd1.S	bcl2l12.S
angptl4.L	abcf1.L	ahnak.S		angptl4.L	Xelaev18035319m	ahnak.S		nasp.L	abcf1.L	apc.L
admp.S	flna	lgr5.S		admp.S	LOC108716731	lgr5.S		top3a.L	flna	mllt4.L
hhip.S	LOC108711140	dlc1.L		hhip.S	pcdh8.L	dlc1.L		kmt5b.S	LOC108711140	elmsan1.S
prph.S	ankrd52.S	rbms2.L		prph.S	loc108703073.S	rbms2.L		vps53.L	ankrd52.S	fez2.S
pcbp2.S	rnf19b.S	Xelaev18036449m		pcbp2.S	Xetrov90020324m.L	Xelaev18036449m		rnf4-a	rnf19b.S	larp6-like.1.S
slc7a5.S	ncoa4.S	phldb3.L		slc7a5.S	LOC108709430	phldb3.L		cpeb4	ncoa4.S	LOC100489074.L
klf17.L	mtx2.L	acy3.L		klf17.L	sema4a.S	acy3.L		morc2.S	mtx2.L	c11orf96.S
gfod1.S	mgat1.L	gprc5cl1.L		gfod1.S	LOC108714507	gprc5cl1.L		dedd.L	mgat1.L	ino80d.S
sh2d3c.S	cebpg.L	cd99l2.L		sh2d3c.S	LOC108716019	cd99l2.L		pphln1.L	cebpg.L	cttnbp2nl.L
nlrc4.L	dctn4.L	ccnd1.S		nlrc4.L	LOC108707322	ccnd1.S		tmem164.L	dctn4.L	usp54.L
akap2.L	mreg.S	wnt5b.S		akap2.L	LOC108698113	wnt5b.S		amacr.L	mreg.S	trafd1.L
LOC108703380	nf1.S	LOC108713946		LOC108703380	nynrin	LOC108713946		zswim3.S	nf1.S	rasa2.L
tex264.S	LOC108704624	LOC108695501		tex264.S	adra2a	LOC108695501		zfhx3.S	LOC108704624	cdc42bpb
rgn.L	neil3.L	LOC108712218		rgn.L	tead4.L	LOC108712218		faim.S	neil3.L	exd1.L
prrt4	pcyox1.L	robo3.S		prrt4	Xelaev18004346m	robo3.S		LOC108696623	pcyox1.L	spryd3.L
sox8.L	tns3.L	LOC108696832		sox8.L	post3.S	LOC108696832		qrich1.1.S	tns3.L	hs6st3
dsel.S	phrf1.L	tsc22d3.L		dsel.S	LOC108717663	tsc22d3.L		rgs12.S	phrf1.L	dop1a
tmem163.S	stag1.S	LOC100489607.1		tmem163.S	tmem265.L	LOC100489607.1		MGC85058	stag1.S	nab1.S
ventx1.2.S	smtnl2.S	LOC108710827		ventx1.2.S	LOC108717895	LOC108710827		elp2.S	smtnl2.S	polr3g.L
LOC100496797.L	spata2l.L	LOC108700904		LOC100496797.L	lmod1.S	LOC108700904		mfsd13a.L	spata2l.L	cdc42ep4.S
Xelaev18042341m	ikbkg.L	hs3st3a1.L		Xelaev18042341m	dgka.L	hs3st3a1.L		satb1.S	ikbkg.L	limd2.S
dgki	ell2.S	LOC108701523		dgki	cdh1.S	LOC108701523		efna5.L	ell2.S	socs6.S
ankrd24.L	uap1.L	ngfr.S		ankrd24.L	slc25a29.L	ngfr.S		sgol1.L	uap1.L	lurap1.S
LOC108700025	baz1b.L	gpx2.S		LOC108700025	Xelaev18017777m	gpx2.S		pank4.L	baz1b.L	cdc37l1.S
cerk	krit1.L	st6galnac2.L		cerk	LOC108703537	st6galnac2.L		med13.S	krit1.L	map3k2.L
Xelaev18003060m	rad54l	sox7.S		Xelaev18003060m	mospd1.L	sox7.S		eif2ak1.L	rad54l	cnp.L
LOC108698461	irf6.S	alcam.S		LOC108698461	LOC108697184	alcam.S		c5orf51.L	irf6.S	adamts6.S
cib3	slc25a44.L	slc30a8.L		cib3	LOC108703752	slc30a8.L		gigyf1.L	slc25a44.L	rnf44.L
cbln1	arhgap35.L	cdk5r1.S		cbln1	Xelaev18006002m	cdk5r1.S		ube2z.S	arhgap35.L	ccdc50
prss27	rragc.L	pnhd.S		prss27	znf608	pnhd.S		prkch.L	rragc.L	sntg1.L
runx1	lcor.L	sall3.S		runx1	mreg	sall3.S		pid1.S	lcor.L	rcbtb1.S
chga.S	psat1.L	ptch2.S		chga.S	ptger3.S	ptch2.S		c4bpa.L	psat1.L	apaf1.L
il10rb.S	arl15.L	entpd2.S		il10rb.S	cebpb.S	entpd2.S		zfc3h1	arl15.L	LOC108717918
plekhs1	acadl.L	LOC108716723		plekhs1	mmp14.L	LOC108716723		fam46b.S	acadl.L	thumpd2.L
fam131b.S	rnf41.L	epn1.S		fam131b.S	LOC108714970	epn1.S		pcif1.L	rnf41.L	tcf20.L
pou3f1.L	tdrd7.L	fosl2.S		pou3f1.L	kctd15.L	fosl2.S		esg2-a	tdrd7.L	mdm2.S
Xelaev18034047m	cdkn2aip.L	cd163		Xelaev18034047m	Xelaev18028552m	cd163		pacsin3.L	cdkn2aip.L	kdm5b.S
pappa.L	rfwd2.L	polm.L		pappa.L	LOC108716545	polm.L		znf507.S	rfwd2.L	tesk2.S
crx.L	mtmr10.L	cass4.L		crx.L	ablim1	cass4.L		pde6d.L	mtmr10.L	c2orf69.L
zic4.L	spryd7.L	vangl1.L		zic4.L	sds.L	vangl1.L		snx13.S	spryd7.L	slf1.L
st3gal1.L	snx9.S	LOC108695812		st3gal1.L	Xelaev18003957m	LOC108695812		phkg2.L	snx9.S	mtus1.S
prph.L	nemp1.S	hao2.L		prph.L	LOC108702848	hao2.L		ercc6l2.L	nemp1.S	lrrc47.L
Xelaev18001619m	prkaa1.S	clca3.L		Xelaev18001619m	Xelaev18004347m	clca3.L		akap13.L	prkaa1.S	pik3r1.L
nkain1.L	rmnd5a.L	itprip.S		nkain1.L	zfp36.S	itprip.S		fam83d.L	rmnd5a.L	dph6.L
Xelaev18024628m	tubg1.S	LOC108701422		Xelaev18024628m	Xelaev18001689m	LOC108701422		zbed6	tubg1.S	ube2w.S
tll1-like.1.L	cpsf3.L	arhgef19.L		tll1-like.1.L	avpr1a.S	arhgef19.L		wsb1.L		ppp1r12a.S
rab11fip4	fubp1.S	Xelaev18024458m		rab11fip4	LOC108711841	Xelaev18024458m		cep85l		osbpl3.L
plxnb1.L	smarcd1.S	LOC108715348		plxnb1.L	atp1b2	LOC108715348		lonp2.L		lifr.S
chrd.L	smc1a.S	wfdc2.L		chrd.L	fcn2	wfdc2.L		zufsp.S		rab5d.S
LOC108709819	tpp2.L	irf1.L		LOC108709819	egr2	irf1.L		fyn.S		rbm24.S
gata5.S	hnrnpab.L	trim67.S		gata5.S	dst	trim67.S		chek1.L		vps4b.L
fabp3.S	hmgb3.S	scnn1a.L		fabp3.S	LOC108698332	scnn1a.L		depdc4.L		ccdc14
slc7a11	ilf3.S	sema3f.S		slc7a11	LOC108699726	sema3f.S		siah1.L		LOC108704260
gprc5b.S	magoh.S	nat8l.L		gprc5b.S	Xelaev18000418m	nat8l.L		emc1.L		ptges.S
arl4c.S	bsg.L	a2m.S		arl4c.S	apeh.L	a2m.S		ak2.S		mkl1.S
abcd2.S	wdr45b.S	lsp1.S		abcd2.S	cdon.L	lsp1.S		poc5.L		prodh.L
efemp2.L	sf3b3.S	anpep.S		efemp2.L	h2afj.L	anpep.S		ttll5.L		efcab14.L
Xelaev18043700m	rab1a.L	Xelaev18029244m		Xelaev18043700m	tcim.L	Xelaev18029244m		zic2.S		kctd3.L
myom1.L	epcam.S	socs2.L		myom1.L	Xelaev18035105m	socs2.L		taf1a.L		slc39a1l.L
socs1.L	txnrd3.L	ptprj		socs1.L	LOC108713828	ptprj		entpd4.S		slc39a14.L
ventx1.2.L	h2afz.L	Xelaev18024603m		ventx1.2.L	insm2.L	Xelaev18024603m		fam89a.L		vezt.L
mid1ip1.L	actg1.S	col11a2p1.S		mid1ip1.L	LOC108711244	col11a2p1.S		MGC85180		wdr59.L
ednra.S	psmc5	irf8.S		ednra.S	cyp27b1.L	irf8.S		rapgef2.L		ext1.L
tbkbp1.S	magoh.L	Xelaev18012750m		tbkbp1.S	LOC108709649	Xelaev18012750m		ccser2.S		r3hdm4.L
ndnf.L	ppp1ca.L	cass4.S		ndnf.L	znf71.L	cass4.S		cab39.S		plekhg4.L
rassf6.S	nucks1.S	admp2.L		rassf6.S	shox2.S	admp2.L		coq6.S		arhgap18.L
LOC108698034	sar1a	hsp90aa1.1.L		LOC108698034	LOC108716734	hsp90aa1.1.L		pop4.L		hdac2.S
chst5.L	selt.S	fzd2		chst5.L	Xelaev18006312m	fzd2		evi5.L		usp15.S
acot8.S	lmnb1.S	wasf3		acot8.S	Xelaev18026939m	wasf3		sytl2.L		dact1.L
shbg	ddx39	nox1		shbg	myod1.L	nox1		ppp1r9a.L		ccnb1.S
slc9a2	lrrc1.S	LOC108711579		slc9a2	trpm4	LOC108711579		parl.L		fgfr1.S
cnr2.S	myl12b.S	Xetrov90004924m.L		cnr2.S	kcnj15.L	Xetrov90004924m.L		btbd3.L		brwd1.L
prickle3	snrnp70.L	foxb1.L		prickle3	kiaa1324l.L	foxb1.L		nufip2.S		ranbp2.L
scin.L	pabpc1.S	Xelaev18022784m		scin.L	Xelaev18038470m	Xelaev18022784m		uvrag.L		mob3c.S
slc9a3r2.L	eif4a1.L	cdx2.L		slc9a3r2.L	LOC108696320	cdx2.L		fam3a.S		nlrx1.L
cacng4.L	hdlbp.S	rpe65.S		cacng4.L	LOC108712665	rpe65.S		nme6.L		cep85.S
apold1.L	anp32e.L	sema3f.L		apold1.L	Xetrov90020553m.S	sema3f.L		Xelaev18032676m		rpa1.L
arhgef3.2.S	cdc42.L	spred1.L		arhgef3.2.S	hcn4	spred1.L		wdr37.L		atat1.S
lrriq3.S	upk1a.L	LOC108703132		lrriq3.S	kiaa1324l.S	LOC108703132		mtfr1l.L		dlc1
card9.L	anp32c.L	dhh.S		card9.L	myt1.S	dhh.S		znf646.L		ism1.L
wnt7a	tomm20.L	lin28a.L		wnt7a	apela.S	lin28a.L		troap		rnf149.L
Xelaev18013398m	smarcc2.L	LOC108698352		Xelaev18013398m	znf185.S	LOC108698352		usp44.L		adgrl2.S
tap2.L	prmt1.S	Xelaev18000483m		tap2.L	egr2.L	Xelaev18000483m		samd4a.S		LOC108702912
glipr2.S	hnrnpa1	Xelaev18004563m		glipr2.S	vav1.L	Xelaev18004563m		tmem203.S		cep57.S
apcdd1.S	khdrbs1.S	LOC100489157-like.S		apcdd1.S	elovl3.L	LOC100489157-like.S		zfx.L		pik3r1.S
cers1.L	ctbp2l.L	loc108648340.L		cers1.L	egr4.L	loc108648340.L		syde2.S		slc25a44.S
ttc34.S	hnrnpa2b1.L	cxorf21.S		ttc34.S	cyp27a1.L	cxorf21.S		fam134a.L		tmem55a.L
nt5dc1.S	hnrnpdl.L	trpm5.L		nt5dc1.S	Xelaev18041975m	trpm5.L		c16orf62.S		helb.L
hpgd.S	luc7l3.L	capn8.S		hpgd.S	Xelaev18029353m	capn8.S		fam83g.S		bves.L
c22orf15.L	ilf3.L	LOC108702458		c22orf15.L	nova2.L	LOC108702458		mael.L		fchsd2
gli1.L	srsf1.S	ccnd1.L		gli1.L	gli3.L	ccnd1.L		dhx40.S		fgfr1.L
xepsin.L	drap1.S	LOC108695521		xepsin.L	Xelaev18032716m	LOC108695521		dnajc16.S		ccdc125.S
cpm.L	hnrnpul2.S	lrrc75b		cpm.L	Xelaev18003767m	lrrc75b		ncln.S		tbc1d14.L
rgl2	tmem147.S	epha4.L		rgl2	ifit5	epha4.L		kctd3.S		c5orf30.S
rasgef1a.L	srsf1.L	itprip.L		rasgef1a.L	tfec	itprip.L		ppm1h.L		trpv4.L
col9a3.L	myef2.S	dmrt2.S		col9a3.L	Xelaev18040896m	dmrt2.S		mfsd14a.L		hip1r.S
Xelaev18006569m	hnrnph1.S	itga6.L		Xelaev18006569m	LOC108703541	itga6.L		znf280d.L		LOC100037197
itgb8.L	fzd7.L	LOC108712667		itgb8.L	Xelaev18003544m	LOC108712667		tbc1d9b		plpp6.L
kif1a	cirbp.S	adam9		kif1a	lef1	adam9		papd5.S		muc3a
vasn.S	elavl1.L	socs3		vasn.S	Xelaev18011648m	socs3		slc22a23.S		sos1.L
Xelaev18028100m	sertad3.L	Xelaev18015096m		Xelaev18028100m	LOC108706197	Xelaev18015096m		hmgcr.L		rab4b.L
LOC108698417	epcam.L	zeb2.L		LOC108698417	icam5	zeb2.L		nufip2.L		eif6.S
dmrt2.L	nop56.L	mst1.L		dmrt2.L	LOC100192369	mst1.L		mink1		insrr.S
MGC147188.L	lhx5.S	foxj1.S		MGC147188.L	LOC108717076	foxj1.S		LOC108703844		ptpn21.S
c17orf58.L	LOC100505446	sst.2		c17orf58.L	pcdh8l.L	sst.2		gng4.S		jade3.S
Xelaev18024706m	itgb1.S	sst.S		Xelaev18024706m	LOC108706274	sst.S		slc30a4.L		pak4
pax6.L	slc25a17.L	ltk		pax6.L	LOC108717933	ltk		ube3a.L		haus2.L
epha7.L	LOC108697862	krt18		epha7.L	LOC108718314	krt18		uso1.S		gse1.L
efnb3.L	dusp11.2.S	foxi4.1.S		efnb3.L	skida1.S	foxi4.1.S		dpp3.L		nap1l4.S
chrd.2.L	leng8.S	apold1.S		chrd.2.L	LOC108705740	apold1.S		serinc3.L		klhl12.S
plcd3.L	stag2.L	LOC100489887.L		plcd3.L	Xelaev18003895m	LOC100489887.L		aldh1a2.L		bfar.L
LOC108698350	upk1b.S	dmrt3.S		LOC108698350	cryaa2	dmrt3.S		arid4b.L		rassf10.S
LOC108698354	ptbp1.S	cd99l2.S		LOC108698354	Xelaev18022785m	cd99l2.S		sirt6.L		enc1.2.L
crabp2.L	actg1.L	lct.1.L		crabp2.L	Xelaev18006063m	lct.1.L		malt1		gse1.S
pxdc1.L	dynll1.S	cdk5r1.L		pxdc1.L	LOC101733888.L	cdk5r1.L		cdc42bpa.L		fzd6.L
atp1a3.L	hmgn3.S	kitlg.L		atp1a3.L	fgfr2.S	kitlg.L		mesdc1.S		slc30a7.S
fosl1.L	pvrl2.L	LOC108706543		fosl1.L	Xetrov90026452m.S	LOC108706543		ago4.S		wnk1.L
map3k19.L	hif-1a	plekhg2.S		map3k19.L	itpr3	plekhg2.S		arrdc1.S		snx10.L
fbxo41.L	myef2.L	pdgfa.L		fbxo41.L	txnip.S	pdgfa.L		mgea5.S		tor1aip1-like.L
tnfsf10.S	p2ry2.L	LOC108715896		tnfsf10.S	akap6-like.S	LOC108715896		smad4.2.L		ptpn12.L
Xetrov90020487m.1	lratd2	nedd4l		Xetrov90020487m.1	Xelaev18002540m	nedd4l		LOC108699305		snx7.L
tmprss9.L	pabpn1.L	pou6f1.L		tmprss9.L	LOC108713490	pou6f1.L		trap1.L		eef2k.L
adm2.L	luc7l3.S	col4a6.L		adm2.L	gli2.S	col4a6.L		znf770.L		zfyve28.L
col12a1.S	LOC108704307	Xetrov90029963m.L		col12a1.S	LOC108716397	Xetrov90029963m.L		ralgps1.S		socs5.S
tph1.S	hnrnpu.S	LOC100491629.L		tph1.S	Xelaev18031374m	LOC100491629.L		kbtbd8.L		slf2.L
ascl2.L	atg4d.S	klhl23.L		ascl2.L	bcl2l10.S	klhl23.L		mia3-like.1.L		tpcn2.L
Xelaev18017453m	hnrnpa1.S	casp7		Xelaev18017453m	trim46	casp7		adam9.S		zbtb8b.L
onecut2.L	cldn4.L	alpl.L		onecut2.L	LOC108705899	alpl.L		senp6.S		narf.L
kcnh4.S	sertad3.S	LOC100490918.L		kcnh4.S	LOC101243550	LOC100490918.L		kmt2d.L		znf282.S
areg.S	u2af1.S	foxj1.L		areg.S	Xelaev18028550m	foxj1.L		zc3h7a.L		hsf2.L
LOC108706753	dck.2.L	olfm4.L		LOC108706753	LOC108705105	olfm4.L		jmy.S		tmtc2.S
lrrc9.L	znf585b.S	lhx3.L		lrrc9.L	foxd1.S	lhx3.L		acvr1b.S		trappc4.S
LOC108701215	kbtbd7.L	eps8l2.S		LOC108701215	Xelaev18009008m	eps8l2.S		pcsk6.L		apc.S
LOC108715070	irs4.L	slc16a9.L		LOC108715070	ig100492381.L	slc16a9.L		bcl7b.L		ccdc186.L
pax3.S	eif4g1.L	fbn1.S		pax3.S	LOC108712518	fbn1.S		bclaf1.S		tcf20.S
trarg1.S	rbmx.L	yrdc		trarg1.S	Xelaev18038081m	yrdc		znf518a.L		znf526.S
LOC108717439	setd2.S	Xelaev18012882m		LOC108717439	LOC108709823	Xelaev18012882m		srgap2.S		sept8.S
vamp5.L	prpf39.1.L	elavl3.L		vamp5.L	LOC108698095	elavl3.L		dpp9.L		acaca-like.S
rai2.S	kif11.S	bcl3.L		rai2.S	irx4.L	bcl3.L		c19orf12.S		usp44.S
loc100496061.L	ticrr.L	kiaa1324.S		loc100496061.L	serpinh1.S	kiaa1324.S		lmo7.S		tesk2.L
egfr.L	plk4.L	LOC108699553		egfr.L	LOC108698800	LOC108699553		gnai2.S		bnip2.S
cep19.L	dhx15.L	fam83c.L		cep19.L	foxa1.S	fam83c.L		b4galnt4.S		bcl11b.S
samd12	gfpt1.L	foxi4.1.L		samd12	mafa.L	foxi4.1.L		lrrfip2		sdhd.S
tmem125.S	tjp2	cish.S		tmem125.S	znf572.L	cish.S		gpr157.L		pkd2.L
col4a1.L	xbp1.L	sox18.S		col4a1.L	Xelaev18029130m	sox18.S		hinfp.S		mfap3l.L
Xetrov90002352m.L	slc1a5.S	rnf223.L		Xetrov90002352m.L	Xelaev18019664m	rnf223.L		chd8.L		arhgef12.S
Xetrov90014299m.L	ncstn.L	map3k14.S		Xetrov90014299m.L	pear1.L	map3k14.S		srebf2.L		akap10.L
apoc1-like.L	Xelaev18025740m	LOC108696887		apoc1-like.L	acer1.L	LOC108696887		c5orf42.L		hn1.S
tns4.L	larp4b.L	irg1.L		tns4.L	Xelaev18040986m	irg1.L		cnot8.L		LOC108712891
tnip3.L	ncstn.S	socs3.L		tnip3.L	LOC108702449	socs3.L		rab9a.L		pdik1l.L
dmrt3.L	sp1.L	acod1l.L		dmrt3.L	kiaa2012	acod1l.L		LOC108704248		ell.L
snap25	e2f7.L	fer1l4		snap25	mfap2.L	fer1l4		traip.L		mast4
Xelaev18015119m	g2e3.L	LOC108715654		Xelaev18015119m	LOC108699748	LOC108715654		creld1.L		abhd2.L
LOC100037118	sf3b5.S	c9.L		LOC100037118	nr2f2	c9.L		nin.L		cep350.S
nkain1.S	slc27a3.L	LOC108717350		nkain1.S	LOC108703467	LOC108717350		mark1.L		MGC83539
zmym3	ubtf.L	tbc1d24.2.S		zmym3	LOC108709519	tbc1d24.2.S		fnip1.L		slc30a5.S
foxd4l1.L	mcm6.2.S	Xelaev18012881m		foxd4l1.L	Xelaev18040899m	Xelaev18012881m		unc5b		myo1e.1.L
LOC108698355	LOC108715080	dhx58.L		LOC108698355	axl.S	dhx58.L		bcl9l.S		bicc1.S
MGC116527	gatad2a.L	ror2.L		MGC116527	Xelaev18047274m	ror2.L		ralgapa2.S		traf3ip1.S
edn2.L	sp1.S	fam120b.S		edn2.L	Xelaev18046094m	fam120b.S		hspa5.S		gcnt1.L
col11a1-like.L	nuak2.L	LOC108704510		col11a1-like.L	jun.L	LOC108704510		rce1.S		usp34.S
LOC108707481	grx5	MGC82544		LOC108707481	LOC108712691	MGC82544		klhl20.S		ssh1.L
LOC108717594	rbm5.L	LOC108696785		LOC108717594	htr1a.S	LOC108696785		bach1.S		snx13.L
crispld2.S	rap2b.S	afap1l2.L		crispld2.S	LOC108716791	afap1l2.L		socs5.L		znf518a.S
LOC108708391	wdr83os.L	zeb2.S		LOC108708391	robo4.S	zeb2.S		scpep1.L		ganab.L
st6gal1.L	chst7.S	cxcl10.L		st6gal1.L	LOC108702643	cxcl10.L		pygo2.L		smtn.L
snai2.L	myc.L	dennd2a.L		snai2.L	emx1.2.L	dennd2a.L		spred2.L		itga5.L
fgd1	purb.L	gpr65.L		fgd1	LOC108716750	gpr65.L		morc2.L		ccdc71l.L
mptx1	unkl.S	atp12a		mptx1	ugt2b4.L	atp12a		arfgef2-like.S		rel.S
proc.L	plekhg7.S	acod1		proc.L	jun.S	acod1		cdc42se2-like.2.L		trim8
LOC108699681	xbp1.S	lypd2.L		LOC108699681	Xelaev18026857m	lypd2.L		dnaja3.S		mfn2.S
kremen2.S	LOC108710814	neurod2.L		kremen2.S	Xelaev18028055m	neurod2.L		ildr1.S		ranbp2.S
p2ry2.S	rabgap1l.L	slc26a4.S		p2ry2.S	hoxd9.L	slc26a4.S		fuca1.L		tmcc1.L
gbx2.1.L	ufc1.S	meis3.L		gbx2.1.L	tox2.S	meis3.L		wasf1.L		rb1cc1.L
itga4.S	hal.1.L	Xelaev18034532m		itga4.S	Xelaev18003524m	Xelaev18034532m		rfwd2.S		morf4l1.L
emilin1.L	mob2.1.L	myoc.L		emilin1.L	Xelaev18030606m	myoc.L		ccdc64.L		chmp1a.S
fli1b.L	ccne2.L	nhs.L		fli1b.L	Xelaev18028821m	nhs.L		cxxc1.S		oaf.S
mybpc2	krasl.S	fosl2.L		mybpc2	Xelaev18034569m	fosl2.L		mns1.L		usp8.S
npy2r-like.1.L	znf740.L	rflcii.L		npy2r-like.1.L	itgb4.S	rflcii.L		samd4a.L		stxbp6.L
s1pr1.L	ptbp1.L	col4a5.L		s1pr1.L	Xelaev18022564m	col4a5.L		mier3.L		cdyl.L
f3.S	dnajb1.L	LOC108704223		f3.S	Xelaev18040117m	LOC108704223		tmem18.S		r3hdm1.S
trpm8b.L	h2afj.S	fam124b.L		trpm8b.L	actc1.S	fam124b.L		tex264		c5orf30.L
chgb.L	ugcg.S	cxcl11.L		chgb.L	pde6d.S	cxcl11.L		klhl8.L		tmem110.L
tmprss9.S	lbr.S	pcdhga2		tmprss9.S	cmpk2.S	pcdhga2		ppp1r14a.S		mid1.S
cfb.L	znf106.L	LOC108713742		cfb.L	pnliprp1	LOC108713742		Xelaev18024710m		slc35a5.S
col4a2.S	c6orf62.S	sucnr1		col4a2.S	fstl1.L	sucnr1		samd4b.S		tspoap1.L
cebpe.S	skil.S	kbtbd11.L		cebpe.S	LOC108717287	kbtbd11.L		cog8.L		popdc3.S
mchr1	rbmx.S	fgd1.L		mchr1	fbxo24.L	fgd1.L		homer2.L		pias4.S
LOC108703573	dusp6.L	akna.S		LOC108703573	pappa	akna.S		fam161a.L		tanc1-like.S
rgs16.S	ptafr.L	cdx1.S		rgs16.S	Xelaev18041918m	cdx1.S		lnpep.L		fam53a.L
pnck.L	zswim4.L	elavl3		pnck.L	Xelaev18009763m	elavl3		zfyve19.L		tldc1.L
slc25a4.L	e2f3.L	dennd2c.L		slc25a4.L	dcst2	dennd2c.L		trappc8.S		srprb.L
Xelaev18036438m	LOC495489	pcdh8l.S			hcls1.S	pcdh8l.S		uap1.S		ddhd1.L
ccna1.S	rfx2.L	pts.S			arhgap36.L	pts.S		zbtb6.S		pdik1l.S
zbtb43.L	gsk3a.S	gpr65.S			Xelaev18031009m	gpr65.S		pcdh1.L		fam13a.L
fzd1	loc100494818.L	Xelaev18002905m			ppp1r3e	Xelaev18002905m		gad1.2.S		grinl1a.L
Xelaev18037589m	rbm15.S	pcolce.L			Xetrov90028960m.L	pcolce.L		tmem259.S		mfn2.L
esr-5.S	tm9sf3.S	Xelaev18032989m			LOC108704362	Xelaev18032989m		ubl3.S		slc30a7.L
gpr12	tomm70a.S	slc7a8.S			afap1l2.S	slc7a8.S		trerf1.L		smarcad1
enc1.2.S	emp2.S	Xelaev18036730m			Xetrov90026252m.L	Xelaev18036730m		MGC115291		smc5.S
reep1.L	LOC108698063	sp6.L			parp6.L	sp6.L		chuk.S		nadk.L
st3gal4.L	ier2.S	cyp26b1.L			LOC495139	cyp26b1.L		rnf11.S		mad2l1bp-like.L
pced1a.L	ctps1.S	cd274.L			cacng4.S	cd274.L		atp8a1.L		tpst2.S
Xelaev18016928m	midn.L	tril.L			Xetrov90019340m.S	tril.L		dlg1		arhgap35.S
zfp36l2.1.S	rdh10.L	lhx3.S			inpp5e	lhx3.S		rap1a.L		haus6.L
loc733728.L	cnn1.S	ltbr			LOC108696845	ltbr		otud7b.S		mpp5.S
cep290.L	loc108715171.S	trarg1.L			Xelaev18026517m	trarg1.L		impad1.L		zbtb33.L
zfpm2.L	timm17a.S	hamp2.L			Xelaev18040122m	hamp2.L		cbx2.S		itpk1.S
slc4a1.L	e2f8.L	il10rb.L			jund.L	il10rb.L		nup133.L		slc25a44
sox17b.1.S	farp2.S	unc93a.L			mfap2.S	unc93a.L		cep78.L		mis18a.L
mxd4.L	slc35a2.S	c3.L			LOC108705667	c3.L		znf234.L		rapgef2.S
rbm24.L	pop7.S	btg3.S			Xelaev18026908m			dhx38.L		kctd9.L
LOC108717639	Xelaev18022211m	ccnb5.L			fibcd1.L			ppp2r5a.S		znf292.S
pygo1.L	LOC108700281	LOC108705579						qrich1.1.L		bbs2.S
anapc10.L	srsf10.L	btg5.1.L						zfyve1.L		blm.S
tnfrsf19.L	LOC108719518	lrrc40.L						polr2f.L		adnp2.L
xylt1.S	aurkb.L	tfrc.L						ralgapa2.L		LOC108716797
zdhhc1.L	brd2.S	znrf1.L						scyl2.L		dsc3.S
trappc13.L	meis3.S	plbd2.L						snx1.S		lpar5.S
h1f0.S	tat.S	cpeb1.S						loc100489386.S		xrcc6.L
rpain.S	LOC108719510	map4.S						oxsm.S		zbtb8b.S
fzd1.L	c15orf39.S	ikzf2.L						rnf145.S		fam83d.S
tm2d3.S	cox18.L	slc39a9-like.1.S						LOC108709941		mcm3.L
dtl.L	sox11.S	cpeb1.L						tank.S		LOC108695564
prr14l	b4galt5.S	ccdc69.S						LOC108704268		btbd9.S
ankrd37.S	hpgd.L	lefty.S						appbp2.S		rif1.S
Xelaev18041248m	Xelaev18024228m	bix1.1.L						vps50.L		ppargc1a.L
loc100158305.L	h1fx.S	btg4.L						nipa2.S		dusp19.L
mctp2.L	cpne3.L	tfrc.S						atxn1.S		ddx1.L
pcmtd1	itpka	hes5_X2.L						pgam5.L		atmin.L
klf6.S	LOC108719535	c14orf159.L						med14.L		ago1.S
ikzf2.S	LOC108720027	Xetrov90003513m.L						tdrd6.L		fntb.S
stc1.S	m6pr.L	dnajc9.L						kif23.L		nrip1.S
ubxn2b.L	hspa2.L	LOC108708333						rad51.L		rasef.S
cemip.L	LOC108696875	lrmp.L						zbed4.L		myo19.S
lig4.L	zc3h10.S	nr3c2.L						asxl3.S		elk4.S
cdc7.L	bmi1.L	fbxo43.S						gmppb.L		ccnyl1.S
anapc10.S	arrdc3.S	nhsl1						mfsd1		MGC53150
mgc69520.S	LOC108700571	tmem19.L						znf526.L		trps1.S
spsb1.L	sox9.S	akip1						abhd17a.S		tfe3.S
fcho1.L	h3c7	pcnt.L						myo10.2.L		plin2.L
itga5.S	upk2.S	cdca7						fam114a2.S		atl2-like.S
sh2d4a.S	LOC108703765	stil.L						kif1b.S		ubap1.L
coq6.L	tfap2c.L	btg4.S						ythdf3.S		b4galt5
adgrg1.L	LOC100191026	cyr61.L						pcdh1.S		txndc11.L
ubn1.L	efna4.L	klhl13.S						znf26		bdp1.S
kank1.L	gas2l1.S	ssx2ip.S						acvr2b.S		scyl2.S
stx11.L	acvr1b.L	map3k2.S						rasal2.S		rlf.L
zfyve1	hsp70.L	fbxo43.L						agap1		cep76.L
birc7.S	fbxo5.L	tmem106b.S						man2a2.L		araf.L
mxd3.L	Xelaev18000460m	snrk.S						c12orf4.L		disp1.S
usp54	mpzl1.L	garem1.L						krcc1.L		dnajb12.L
birc7.L	ptgs2.S	LOC108703747						gnaq.L		pik3ca.S
pdzd2.L	tuba3c.S	akap11.S						stx16.L		aak1.S
rsad1.L	upk3b.L	ccdc69.L						irf2bpl.L		agap1.L
sirt3.2.L	slc38a2.L	oat.1.S						wdr34.L		fam134c.L
wdfy2.S	relt.L	ccna1.L						kbtbd8.S		slc35e3.S
abhd5.L	muc5b	arhgap20.S						pard6g.S		zar2.L
emilin2.L	tmem79.S	atf6b.S						snip1.L		mthfr.L
snx7.S	stk38l.L	usp15.L						gtpbp2.S		atad3a.L
ptprh.S	mief2.L	rdh13.L						borcs7.S		c11orf24
LOC108699404	sall1	LOC108708627						aebp2.S		arhgef17.L
pacrgl.L	LOC108704304	ssx2ip.L						map4k4-like.L		pex12.S
pcdh18.S	LOC108698488	atf6b.L						LOC100158370		tanc2.L
nfkb2.L	LOC108703763	fhdc1						ttbk2.L		MGC83487
ccnb1.L	gs17.S	gmnn.L						ccdc61.L		tbk1.S
b3gnt5.S	cfap52.L	MGC68639						rnf130.S		ets1.S
nol4l.L	ier2.L	intu.S						cab39l.L		hprt1.L
map1lc3c.L	LOC108715301	map4.L						gnaq.S		trit1.L
kif11.L	slc16a3	elk4.L						kif2c.L		tmem131l.L
zbed1.L	LOC494849	rsbn1l.L						Xelaev18031388m		vps13c.L
Xelaev18021540m	LOC108705274	hs3st1.S						git2		atg4a.L
lgr4.L	adrb2.S	jade2.L						tasp1.S		katnb1.L
leprot.L	ier5l.L	pan2.L						afg3l2		ext1.S
c11orf96.L	mlec.L	ppp1r3b.S						efcab14.S		dync1li2.L
zdhhc23.L	LOC108705671	pcnxl4.L						usp42.L		LOC100127316
ntmt1.S	arrdc3.L	LOC108718425						dock7.S		atg14.L
MGC83480	akap12.S	haus4.L						sec62.L		LOC108709196
MGC147172.L	fam110c.S	ipp.L						dbf4.L		mxd1.L
xrcc6bp1.L	mplkip	fibp.L						oaf.L		sptssb.L
LOC108707252	cebpd.L	rcbtb1.L						zbtb41.L		sik3.L
hhipl1.S	LOC108705687	kiaa0141.S						tmem209.S		trim8.L
myc.S	ccnf.L	adcy6.L						sav1.L		znf654.L
map2k4.S	btbd6.L	arhgap20.L						frrs1.L		gpbp1l1.S
pgam1.S	Xelaev18025314m	cat.2.L						fam73a.L		tmem51.L
hivep1.S	klf11.L	oxr1						loc733735.L		stambp.L
kif7.L	gpr4.S	kdm8.L						adpgk.L		arl10b.L
ifngr2.1.L	lrig2.L	usp33.L						ankle2.L		rlim.S
lrp5.L	prrt1.L	trps1.L						nde1.S		kmt2a.S
poc1a.L	znf653.L	hs3st1						ptpn23.S		akap13.S
txnl4b.S	cdk1.S	serinc2.L						aamp.L		mtmr3
them6.L	sox4.S	klf15.2.L						LOC108701166		dgkh
fastkd1.L	otud1.L	blm.L						bad.L		Xelaev18001402m
sh2b3.S	neurog2.L	rspry1.S						srebf1.S		acot12.L
znrf1.S	gtf3c3.S	LOC100489554.L						ncapd2.S		chp1.L
arid5b-like.1.S	LOC108699475	smtn.S						rev3l.L		ppm1k.S
mbd2.S	egln3.L	tm2d2.S						clasrp.L		ap5b1.L
pcdh20.S	gnb3.L	ndst2.S						arl8b.L		pde10a.S
sept9.S	MGC80567	gtf3c2.L						uso1.L		fancm.L
e2f1.L	ckap4.S	tubg1.L						azi2		cdc42ep2.L
ccdc71l.S	ing4.L	wdr6.L						rab27b.L		alg11.L
rhobtb1.L	LOC108711832	Xelaev18041239m						mpst		gemin5
dnajc16.L	fam43a.S	ppp1r3b.L						cap1.S		MGC85120
pcmtd2.S	notch3.L	rnf185.L						cspp1.L		gpbp1l1.L
mtmr8	rbm5.S	rbm26.L						b4galt5.L		ulk2.L
insm1.S	stard10.L	tpgs1.S						eloa		cdc25a.L
ldlrad4.S	slc18a2	cbx4.S						lin28b.S		klf12.L
ctsc.L	LOC108706094	ccng1.S						ddx19b.L		ubn2.S
LOC108706498	zbtb10.S	nsl1.L						ccnl1		triobp.S
kank1.S	LOC108716428	tor3a.L						stk17a.L		pard6g.L
fbxo30.S	LOC733379	lrrcc1.L						bdp1.L		filip1.L
elmod2.L	pvrl1-like.2.L	wdr20.L						fam102b.L		fkbp6.L
enpp2	terc.L	ccdc191.L						chd8.S		stambp.S
tor2a.L	gpr161	wdr20.S						prdm10.L		acap3.L
prkcz.S	krt.S	tnfrsf10b.L						med14.S		got2.L
kazn.L	aldh1l1.L	loc100491633.L						map3k10.L		ago1.L
tnfsf11.L	LOC108718018	phf19.S						sass6.L		spopl.S
nr1h2.L	fbxl20.S	mylip.S						jmjd1c.L		mief1.L
LOC108714466	LOC108705992	loc100145576.L						usp31.L		abl2.L
cdyl2.S	bicd1	retreg3						ccdc15.S		dusp22.S
spdl1.L	elf1.L	tmem116.L						sbds.L		ccdc117
irf2bpl.S	chst2.L	ect2.S						msantd2		fbxo46.S
slc25a37.L	asb2.S	znrf3.L						tubgcp3.S		mycl.L
prdm2.L	lsm14b.L	golga5.L						msl2.L		def8.S
tmem185a.S	Xelaev18007686m	cenpl.S						lemd3.S		kdm5b
rbm38.S	mab21l2.L	zar1l.S						mlxip.L		tank.L
ect2.L	htra1.S	nt5dc3.S						ssbp2.S		mgll.L
Xelaev18032680m	znf268.L	bmp2.S						arhgef11.L		ei24.S
otud3.L	sox1.S	kctd9.S						ncs1.L		usp37.L
glt1d1.L	LOC108705674	ndrg4.S						tiam1.S		velo1.L
ift80.L	LOC108704568	sik2.L						ppip5k2.L		c1orf84.L
tbc1d31.L	MGC68910	prmt5.L						fmn2.L		pou5f3.3.S
LOC108718785	cldn23	septin9.L						ppp3cc.S		mfsd6.S
cerk.S	gprc5c.L	LOC108719544						atrip.S		glce.S
socs2.S	LOC108698759	tada2b.S						zyg11b.S		ino80d.L
kbtbd3	pou5f3.1.S	znf81.L						stk24.S		nus1.L
atp6v0a2.L	ccnb3.S	rnf149.S						tdrp.S		tbc1d10a.L
dnmt1.S	MGC82975	vegfa.S						golgb1.S		taf4b.S
mbd4.L	fbxl14.L	gramd2b.S						ebag9.S		bcdin3d.L
MGC83673	LOC108705792	bnc1.L						wsb2.L		znf292.L
eif2ak3.S	zswim4.S	rnf185.S						cdk8		arl6ip6.L
fam89a.S	cdknx.L	uhrf2.L						plin3.S		c14orf119.L
arhgap28.L	hexim1.S	tmem171.L						top1.2.S		sipa1l3.L
zgrf1	LOC108703833	cables1.S						dock9.L		csnk1d.L
gpr137b.L	Xelaev18012386m	fbxw2.S						klhdc10		MGC115510
larp6-like.1.L	klf10.S	trak1						tmem104.S		grk3
abo.2.L	hist1h2ad.1	fam63b.L						igf2r.L		syde2.L
etv3l.S	vgll4l.L	acox2.L						kif21a.L		satb1.L
csrnp1.S	msx1.L	adamtsl1						stam.L		arhgef12.L
tacc3.S	pjvk.S	sdhd.L						ankrd28		wtip.S
dip2b	klf10.L	zfpm1						atrn.S		pou5f3.3.L
trabd.L	hes1.S	irf2.L						bud31.S		picalm.1.L
zak.L	fzd8.S	zfp36l2.2.L						adgra3.L		atxn1l.L
MGC98819	mypop	dnajb9.S						kif14.L		spsb4.L
fbp2.L	LOC108715937	nfe2l2.S						wdfy3		arhgef18.S
fut11.S	hunk.S	akap11.L						lrrc16a.L		prr14.L
scnn1g.S	LOC108705673	fut11.L						mier1.L		spg21.L
cd59-like.L	fth1.S	lrriq1.L						dstyk.S		peak1.L
cfap97.L	jag1.L	arhgap33.S						fkbp4.L		dolpp1.L
dock7.L	LOC108696788	rsbn1l.S						ap2b1.S		casc4.S
usp33.S	LOC108710290	klhl13.L						aaas.L		men1.L
rcan3.L	eif4a2.L	znf628.L						dnaaf5.S		prkcsh.S
ttc39a.L	Xelaev18003044m	uspl1.S						luzp1.S		plxna3.S
pcmtd1.S	Xelaev18008693m	ing1.L						fitm2.L		b3gnt7.S
smad2.S	LOC108704127	e2f1.S						arhgap11a.1.L		rlf.S
pex6.S	ldlr.S	ring1.S						hspbap1.L		znf507.L
fam69b.L	lin28a.S	slc18a2.L						casp8ap2		mpp5.L
tubgcp4.L	trpv6	kiaa1715.L						fez2.L		tigd4
LOC108700788	olig2.L	lfng.S						trmt13.L		mastl.S
fkrp.L	cldn5.L	bcor.L						cask.L		mtus1
foxn4.S	abcb1	znf367.S						rps6ka3.L		rnf112.1.S
ahsa1.L	Xelaev18018970m	wdr77.S						znf839.L		ptcd2.L
snx25.L	fos.S	fam21a.L						lhfpl2.S		rabgef1.L
fbxo31.L	fos.L	tfeb.S						smarcal1.L		vps54.L
slc15a4.L	mars2	arf3.S						tbc1d12.L		sh2b3.L
arv1.L	pcdha13.S	etaa1.L						rapgef6.S		sik2.S
prpsap2.L	Xetrov90002989m.S	disp1.L						gemin2.S		smg8.S
orc1.L	pkn2	gtf2ird2b						kctd5.L		arhgef15.L
rgs3.S	mvp.S	crtc2.L						nusap1.S		kdf1.S
nbeal2.S	Xelaev18013159m	cyld.S								fam208a.S
smad9.L	pou5f3.1.L	garem1.S								ipmk.S
chd1.S	Xelaev18014773m	tpgs1.L								mtmr3.L
rgs12.L	usp43	c1orf116.L								st3gal2.1.L
msantd3.S	hist1h2aj.L	rab5d.L								LOC108704263
LOC108703834	slc16a6.S	LOC108705790								suox.L
evi5.S	Xelaev18009900m	tmem117.S								stk10.L
LOC108704241	lhx1.L	pkd1.L								cyld.L
dock4	fat2	plch1								plekha3.L
nr3c1.L	LOC108719577	leprot.S								scd.L
enpp2.L	LOC108707128	jade1.S								loc100145507.S
coq10a.S	hes5.2.L	mecr.S								kiaa0922.S
lpcat1.S	LOC108700753	simc1.L								slc30a4.S
lss.S	mafb.L	rab11fip1.S								tbc1d4.S
irf2bp2.L	LOC108715641	evc2.L								tmtc3.L
chsy1.S	LOC108697537	nhlrc3.S								samd4b.L
strbp.L	crebl2.L	dnajb9.L								ttc31.L
fam13a.S	Xelaev18001991m	katnbl1.L								rab8b.L
tdp2.S	LOC108703840	limk1.L								limch1.L
mpp5	cmtm8.L	pif1.L								nemp1.L
rad1.L	foxn4.L	LOC108714398								dtx2.L
tmem251.L	hap1.S	fdft1.S								bicc1.L
ccng2.L	kcna3.L	slc25a43.L								zic2.L
vps26b.L	pcdh8.S	dtl.S								pak4.L
rfx5.S	slc18a1	fam8a1.L								fryl.S
MGC86530	Xelaev18036077m	mlh1.S								gtse1
mpv17l2.L	LOC108707159	soga1.L								unc119.L
mecp2.S	Xelaev18000325m	slc8b1.S								snx4.S
cnot8.S	rasgef1b.L	plxnb3.S								pikfyve.L
plekho1.L	alk	aco2.L								rasa1.L
cep112	khk.S	vldlr.S								rpa2.S
syne2.2.S	Xelaev18037263m	bbs9.L								mcm3ap.L
mllt1.L	znf608.S	map7d3.L								prc1.S
tmem128.S	LOC108704293	kiaa1958								ptpn12.S
ccser2.L	fam198b.L	plch2								snx17.L
hspa13.L	caprin2.S	tmem259.L								tmem57.L
mtbp.S	Xelaev18002950m	tnfrsf10b.S								unnamed.S
tmem143.S	eppk1.L	senp7.L								rnf19b.L
hps6.L	trim29.L	plxnb3								kdm4c.S
cep104.S	tbx15.L	med13l.L								hmg20b.L
ankrd12.L	pkn1	ptpn3.S								sbf2.S
aggf1.L	LOC108705785	hs6st1.L								pwwp2b.S
kcnj5.L	ist1	fbxo30.L								rnf115.S
mex3d.L	usp43.L	lats2.S								ipmk.L
fbxw9.S	atf4.S	atf5.2.S								ppp3cc.L
MGC52683	Xelaev18035319m	nr3c2.S								jade3.L
atf7ip.S	LOC108716731	tubgcp3.L								camsap2
gtf2h2.S	pcdh8.L	dok1.L								tcf7.S
epb41l4b.S	loc108703073.S	pgam1.L								dnajb14.L
bbs1.L	Xetrov90020324m.L	rpap1.S								rfx7
rxrg.L	LOC108709430	adgrg1.S								ppp1r12a.L
brip1.L	sema4a.S	klhl17.L								lysmd4.L
uhrf1bp1l.L	LOC108714507	gpr75.S								e2f4.L
mis18bp1b	LOC108716019	orc4.L								fam214a.L
rnaseh1.L	LOC108707322	cables1.L								sdc3
loc100216027.L	LOC108698113	c10orf2.L								otud7a.L
fdxacb1.L	nynrin	slc7a6os.L								pcmtd2.L
tdgf1.1.L	adra2a	rad17.L								c17orf53.L
ccs.L	tead4.L	arhgap11a.2.L								katnb1.S
zbtb5.L	Xelaev18004346m	rnf103.L								MGC79091
ccdc107	post3.S	b9d2.L								rrm2.2.S
arhgap11a.2.S	LOC108717663	piezo1.S								tmem184b.L
baz1a.S	tmem265.L	kif13a								LOC100127794.L
gxylt1.L	LOC108717895	irf2.S								adgrl2.L
lats2.L	lmod1.S	map7d2								araf.S
tbpl1.L	dgka.L	psen2.S								nxf1
irs1.S	cdh1.S	zar1l.L								wnk3.L
snx16.S	slc25a29.L	rspry1.L								ric1.S
rasef	Xelaev18017777m	aktip.S								tmem57.S
dact1.S	LOC108703537	tmem181.L								adcy6.S
sprtn.S	mospd1.L	ddit4.S								sbk1.L
LOC108703781	LOC108697184	lbh.L								gnpat.S
mgat3.L	LOC108703752	clcc1								rnf219.L
loc100493164.L	Xelaev18006002m	apex2.L								sel1l.S
errfi1.S	znf608	depdc7.S								znf268
fam134a.S	mreg	fam104a.S								chmp1a
pik3r3.L	ptger3.S	MGC84185								nus1.S
rnf44.S	cebpb.S	LOC108718134								tbp.L
esyt3.S	mmp14.L	sema4d								fer.L
iffo2	LOC108714970	LOC108709286								zfyve9.L
tshz3.S	kctd15.L	sertad2.L								golga1.L
klhl15.L	Xelaev18028552m	ndst2.L								tnrc6c.S
paqr3.L	LOC108716545	zdbf2-like.L								usp46.L
tfap4.L	ablim1	prkcsh.L								top1mt-like.L
fbxo11.S	sds.L	espl1.L								dars2.L
map11	Xelaev18003957m	ints6.L								pigu
scai	LOC108702848	rab20.L								mast4.S
LOC108705825	Xelaev18004347m	txndc9.L								aip.L
topaz1.L	zfp36.S	tbp.S								tubgcp5
ncoa6.L	Xelaev18001689m	clns1a								lamp2.L
cenpj.L	avpr1a.S	ikzf4.S								sytl2.S
kiaa2026.S	LOC108711841	mcm10.L								arhgap21.S
wdr37.S	atp1b2	lmo4.2.L								fam193b.S
edc3.L	fcn2	ammecr1l.L								cdc42bpb.L
zcchc14.L	egr2	paxip1.S								adam10
MGC81163	dst	LOC108716761								brca2.L
prex1.L	LOC108698332	sertad2.S								cbwd1.1.S
rnf169.S	LOC108699726	sec24b.S								map3k7.L
zrsr2.L	Xelaev18000418m	cbwd1.1.L								rb1cc1.S
LOC397949	apeh.L	pms2.L								loc100126636.S
fam219b.L	cdon.L	tanc1-like.L								asxl3.L
pex12.L	h2afj.L	znf318.S								polg.L
ube2s.L	tcim.L	sun1.S								leprotl1.S
bcl2l14.S	Xelaev18035105m	trim2.L								snx11.L
plekhg4.S	LOC108713828	ints6.S								ip6k1.L
LOC108708239	insm2.L	bmp2.L								slc6a14.2.L
vmac.L	LOC108711244	ccdc171								atp8b1.L
d2hgdh.S	cyp27b1.L	crls1.S								ddx3x.L
cidec.S	LOC108709649	arf6.L								abcb6.L
lmo4.1.S	znf71.L	rabgef1								setbp1.S
ccdc126.S	shox2.S	dnmt1.L								atp9b.L
lzts2.L	LOC108716734	acap3.S								peli1.L
btg3.L	Xelaev18006312m	ythdc2.L								rfx7.L
rab12.S	Xelaev18026939m	mfsd14a.S								gigyf2.L
sema4g.L	myod1.L	pde8a								rnf220.1.L
clspn.S	trpm4	frmd4a.L								syne2
cmtm7.S	kcnj15.L	syap1.S								pqlc1.1.S
exoc8.S	kiaa1324l.L	LOC108711716								necap1.S
ca12.L	Xelaev18038470m	atxn7l1.S								rnf169.L
Xelaev18011044m	LOC108696320	tbc1d9								baiap2l1.L
ralgapb.L	LOC108712665	idh3a.L								xl64phr
fzr1.L	Xetrov90020553m.S	rin3.L								batf3.S
cdc45.L	hcn4	camsap1.L								rab8a.L
brf2.S	kiaa1324l.S	hhipl1.L								rictor
oat.1.L	myt1.S	dync1li2.S								apitd1.L
dact3.S	apela.S	ppargc1b.L								slc39a10.L
anln-like.1.L	znf185.S	ksr1.L								arhgap32.L
usp12.S	egr2.L	adh5.L								dnmbp.L
snap47.L	vav1.L	gtpbp6.S								dapk1.L
mia3	elovl3.L	ncoa6.S								ccnb2.L
alg1.L	egr4.L	rassf3.S								dip2a.S
tada3.S	cyp27a1.L	atad3a.S								akap1
csgalnact2.L	Xelaev18041975m	trappc13.S								mphosph9.L
tmem64.L	Xelaev18029353m	LOC108704278								spopl.L
ccnl2.S	nova2.L	tlcd2.L								fryl.L
ing2.S	gli3.L	dock9								LOC108698716
Xelaev18041850m	Xelaev18032716m	uspl1-like.L								fkbp8.L
fndc3a.S	Xelaev18003767m	oxr1.S								ppp1r37.L
LOC108703749	ifit5	mau2.S								aak1
irs2	tfec	arhgap40.S								ipo13.S
tnks2.S	Xelaev18040896m	atg4a.S								dcaf5.L
LOC495407	LOC108703541	adamts6								pdzd2.S
sft2d3.S	Xelaev18003544m	brd1.S								dcun1d3.L
Xelaev18028646m	lef1	gsap.L								kpna4.L
h1foo.S	Xelaev18011648m	n4bp3.S								kmt2b
ring1.L	LOC108706197	golga5.S								kpnb1.L
daglb.L	icam5	zfpm1.S								cdkn2aip.S
tmem243.L	LOC100192369	hells.L								suco.L
tradd.L	LOC108717076	eme1.L								pnisr.L
golph3l.S	pcdh8l.L	mb21d2.S								pdpk1.L
irf9.L	LOC108706274	ippk.S								mau2.L
pi4k2b.S	LOC108717933	pttg1ip.2.L								cxcr4.L
orai2.L	LOC108718314	gtf3c1.L								fnbp1l.L
lrp12.S	skida1.S	sipa1l3.S								mast2.S
afdn.S	LOC108705740	cnppd1.L								eml1
plekhg1.S	Xelaev18003895m	tlcd2.S								lbh.S
kif4a.L	cryaa2	dnajb14.S								secisbp2l.S
sphk1.L	Xelaev18022785m	mtus1.L								c5orf24.S
vps33b.L	Xelaev18006063m	cnksr2.L								taf5l.S
cenpe.L	LOC101733888.L	zbtb5.S								kdm4a.S
gtf3c4.L	fgfr2.S	mapk1.S								klhl22.L
tnfsf11.S	Xetrov90026452m.S	ttc8.L								dhx35.S
cpeb4.S	itpr3	rsbn1.L								dicer1.L
zdhhc9.L	txnip.S	prmt5.S								bptf.L
acox3.L	akap6-like.S	casp9.S								fnbp1l
zbtb22.S	Xelaev18002540m	mpi.S								c16orf52.L
irf6.2.L	LOC108713490	galnt4.L								xplcg1a
phldb1	gli2.S	wdr60.S								dock4.L
MGC85210	LOC108716397	klf6.L								mcoln2.L
acvr1.S	Xelaev18031374m	wdr60.L								phf14.L
kiaa1456.L	bcl2l10.S	dscr3.L								trim33.S
bicd1.L	trim46	slc35f5.L								mapk7.L
ing2.L	LOC108705899	katnbl1.S								zhx3.S
pik3r3.S	LOC101243550	sertad2								c11orf95.L
rnf146.S	Xelaev18028550m	ccdc186								spin1.L
Xelaev18038799m	LOC108705105	bahcc1.S								pkn2.L
setd1b.L	foxd1.S	med13l.S								hook3.L
rnmtl1.L	Xelaev18009008m	eif5a.S								cgnl1.S
trim39.L	ig100492381.L	LOC108718309								akap1.S
smap2.S	LOC108712518	def8.L								nfatc3.S
ncoa4.L	Xelaev18038081m	tle4.S								ubap1.S
pxylp1.L	LOC108709823	lrr1.L								rfc1.L
ahctf1.L	LOC108698095	pisd.L								phax.S
dcun1d3.S	irx4.L	cpeb3.S								smap2.L
mapk1.L	serpinh1.S	tcirg1.L								clint1.L
furin.L	LOC108698800	gm29884								ankrd49.S
fgfr3	foxa1.S	atp10b								slc30a6.S
cep126	mafa.L	sec24b.L								slc39a9.L
c12orf66.S	znf572.L	kiaa2026.L								rhog-like.1.S
rab4b.S	Xelaev18029130m	zbed1
ncor2	Xelaev18019664m	ice1
rhof.S	pear1.L	atf7.S
nasp.L	acer1.L	zc3h6
top3a.L	Xelaev18040986m	josd1.S
kmt5b.S	LOC108702449	plcl2.L
vps53.L	kiaa2012	casd1.L
rnf4-a	mfap2.L	znf280d.S
cpeb4	LOC108699748	vps26b.S
morc2.S	nr2f2	fam53c.S
dedd.L	LOC108703467	wrap73.L
pphln1.L	LOC108709519	gpr63.L
tmem164.L	Xelaev18040899m	npat.S
amacr.L	axl.S	ptpn21.L
zswim3.S	Xelaev18047274m	pex11a.L
zfhx3.S	Xelaev18046094m	zdhhc7.S
faim.S	jun.L	vegfa.L
LOC108696623	LOC108712691	styx.L
qrich1.1.S	htr1a.S	haus8.L
rgs12.S	LOC108716791	znf577.S
MGC85058	robo4.S	foxi2.S
elp2.S	LOC108702643	bcl2l12.S
mfsd13a.L	emx1.2.L	apc.L
satb1.S	LOC108716750	mllt4.L
efna5.L	ugt2b4.L	elmsan1.S
sgol1.L	jun.S	fez2.S
pank4.L	Xelaev18026857m	larp6-like.1.S
med13.S	Xelaev18028055m	LOC100489074.L
eif2ak1.L	hoxd9.L	c11orf96.S
c5orf51.L	tox2.S	ino80d.S
gigyf1.L	Xelaev18003524m	cttnbp2nl.L
ube2z.S	Xelaev18030606m	usp54.L
prkch.L	Xelaev18028821m	trafd1.L
pid1.S	Xelaev18034569m	rasa2.L
c4bpa.L	itgb4.S	cdc42bpb
zfc3h1	Xelaev18022564m	exd1.L
fam46b.S	Xelaev18040117m	spryd3.L
pcif1.L	actc1.S	hs6st3
esg2-a	pde6d.S	dop1a
pacsin3.L	cmpk2.S	nab1.S
znf507.S	pnliprp1	polr3g.L
pde6d.L	fstl1.L	cdc42ep4.S
snx13.S	LOC108717287	limd2.S
phkg2.L	fbxo24.L	socs6.S
ercc6l2.L	pappa	lurap1.S
akap13.L	Xelaev18041918m	cdc37l1.S
fam83d.L	Xelaev18009763m	map3k2.L
zbed6	dcst2	cnp.L
wsb1.L	hcls1.S	adamts6.S
cep85l	arhgap36.L	rnf44.L
lonp2.L	Xelaev18031009m	ccdc50
zufsp.S	ppp1r3e	sntg1.L
fyn.S	Xetrov90028960m.L	rcbtb1.S
chek1.L	LOC108704362	apaf1.L
depdc4.L	afap1l2.S	LOC108717918
siah1.L	Xetrov90026252m.L	thumpd2.L
emc1.L	parp6.L	tcf20.L
ak2.S	LOC495139	mdm2.S
poc5.L	cacng4.S	kdm5b.S
ttll5.L	Xetrov90019340m.S	tesk2.S
zic2.S	inpp5e	c2orf69.L
taf1a.L	LOC108696845	slf1.L
entpd4.S	Xelaev18026517m	mtus1.S
fam89a.L	Xelaev18040122m	lrrc47.L
MGC85180	jund.L	pik3r1.L
rapgef2.L	mfap2.S	dph6.L
ccser2.S	LOC108705667	ube2w.S
cab39.S	Xelaev18026908m	ppp1r12a.S
coq6.S	fibcd1.L	osbpl3.L
pop4.L		lifr.S
evi5.L		rab5d.S
sytl2.L		rbm24.S
ppp1r9a.L		vps4b.L
parl.L		ccdc14
btbd3.L		LOC108704260
nufip2.S		ptges.S
uvrag.L		mkl1.S
fam3a.S		prodh.L
nme6.L		efcab14.L
Xelaev18032676m		kctd3.L
wdr37.L		slc39a1l.L
mtfr1l.L		slc39a14.L
znf646.L		vezt.L
troap		wdr59.L
usp44.L		ext1.L
samd4a.S		r3hdm4.L
tmem203.S		plekhg4.L
zfx.L		arhgap18.L
syde2.S		hdac2.S
fam134a.L		usp15.S
c16orf62.S		dact1.L
fam83g.S		ccnb1.S
mael.L		fgfr1.S
dhx40.S		brwd1.L
dnajc16.S		ranbp2.L
ncln.S		mob3c.S
kctd3.S		nlrx1.L
ppm1h.L		cep85.S
mfsd14a.L		rpa1.L
znf280d.L		atat1.S
tbc1d9b		dlc1
papd5.S		ism1.L
slc22a23.S		rnf149.L
hmgcr.L		adgrl2.S
nufip2.L		LOC108702912
mink1		cep57.S
LOC108703844		pik3r1.S
gng4.S		slc25a44.S
slc30a4.L		tmem55a.L
ube3a.L		helb.L
uso1.S		bves.L
dpp3.L		fchsd2
serinc3.L		fgfr1.L
aldh1a2.L		ccdc125.S
arid4b.L		tbc1d14.L
sirt6.L		c5orf30.S
malt1		trpv4.L
cdc42bpa.L		hip1r.S
mesdc1.S		LOC100037197
ago4.S		plpp6.L
arrdc1.S		muc3a
mgea5.S		sos1.L
smad4.2.L		rab4b.L
LOC108699305		eif6.S
trap1.L		insrr.S
znf770.L		ptpn21.S
ralgps1.S		jade3.S
kbtbd8.L		pak4
mia3-like.1.L		haus2.L
adam9.S		gse1.L
senp6.S		nap1l4.S
kmt2d.L		klhl12.S
zc3h7a.L		bfar.L
jmy.S		rassf10.S
acvr1b.S		enc1.2.L
pcsk6.L		gse1.S
bcl7b.L		fzd6.L
bclaf1.S		slc30a7.S
znf518a.L		wnk1.L
srgap2.S		snx10.L
dpp9.L		tor1aip1-like.L
c19orf12.S		ptpn12.L
lmo7.S		snx7.L
gnai2.S		eef2k.L
b4galnt4.S		zfyve28.L
lrrfip2		socs5.S
gpr157.L		slf2.L
hinfp.S		tpcn2.L
chd8.L		zbtb8b.L
srebf2.L		narf.L
c5orf42.L		znf282.S
cnot8.L		hsf2.L
rab9a.L		tmtc2.S
LOC108704248		trappc4.S
traip.L		apc.S
creld1.L		ccdc186.L
nin.L		tcf20.S
mark1.L		znf526.S
fnip1.L		sept8.S
unc5b		acaca-like.S
bcl9l.S		usp44.S
ralgapa2.S		tesk2.L
hspa5.S		bnip2.S
rce1.S		bcl11b.S
klhl20.S		sdhd.S
bach1.S		pkd2.L
socs5.L		mfap3l.L
scpep1.L		arhgef12.S
pygo2.L		akap10.L
spred2.L		hn1.S
morc2.L		LOC108712891
arfgef2-like.S		pdik1l.L
cdc42se2-like.2.L		ell.L
dnaja3.S		mast4
ildr1.S		abhd2.L
fuca1.L		cep350.S
wasf1.L		MGC83539
rfwd2.S		slc30a5.S
ccdc64.L		myo1e.1.L
cxxc1.S		bicc1.S
mns1.L		traf3ip1.S
samd4a.L		gcnt1.L
mier3.L		usp34.S
tmem18.S		ssh1.L
tex264		snx13.L
klhl8.L		znf518a.S
ppp1r14a.S		ganab.L
Xelaev18024710m		smtn.L
samd4b.S		itga5.L
cog8.L		ccdc71l.L
homer2.L		rel.S
fam161a.L		trim8
lnpep.L		mfn2.S
zfyve19.L		ranbp2.S
trappc8.S		tmcc1.L
uap1.S		rb1cc1.L
zbtb6.S		morf4l1.L
pcdh1.L		chmp1a.S
gad1.2.S		oaf.S
tmem259.S		usp8.S
ubl3.S		stxbp6.L
trerf1.L		cdyl.L
MGC115291		r3hdm1.S
chuk.S		c5orf30.L
rnf11.S		tmem110.L
atp8a1.L		mid1.S
dlg1		slc35a5.S
rap1a.L		tspoap1.L
otud7b.S		popdc3.S
impad1.L		pias4.S
cbx2.S		tanc1-like.S
nup133.L		fam53a.L
cep78.L		tldc1.L
znf234.L		srprb.L
dhx38.L		ddhd1.L
ppp2r5a.S		pdik1l.S
qrich1.1.L		fam13a.L
zfyve1.L		grinl1a.L
polr2f.L		mfn2.L
ralgapa2.L		slc30a7.L
scyl2.L		smarcad1
snx1.S		smc5.S
loc100489386.S		nadk.L
oxsm.S		mad2l1bp-like.L
rnf145.S		tpst2.S
LOC108709941		arhgap35.S
tank.S		haus6.L
LOC108704268		mpp5.S
appbp2.S		zbtb33.L
vps50.L		itpk1.S
nipa2.S		slc25a44
atxn1.S		mis18a.L
pgam5.L		rapgef2.S
med14.L		kctd9.L
tdrd6.L		znf292.S
kif23.L		bbs2.S
rad51.L		blm.S
zbed4.L		adnp2.L
asxl3.S		LOC108716797
gmppb.L		dsc3.S
mfsd1		lpar5.S
znf526.L		xrcc6.L
abhd17a.S		zbtb8b.S
myo10.2.L		fam83d.S
fam114a2.S		mcm3.L
kif1b.S		LOC108695564
ythdf3.S		btbd9.S
pcdh1.S		rif1.S
znf26		ppargc1a.L
acvr2b.S		dusp19.L
rasal2.S		ddx1.L
agap1		atmin.L
man2a2.L		ago1.S
c12orf4.L		fntb.S
krcc1.L		nrip1.S
gnaq.L		rasef.S
stx16.L		myo19.S
irf2bpl.L		elk4.S
wdr34.L		ccnyl1.S
kbtbd8.S		MGC53150
pard6g.S		trps1.S
snip1.L		tfe3.S
gtpbp2.S		plin2.L
borcs7.S		atl2-like.S
aebp2.S		ubap1.L
map4k4-like.L		b4galt5
LOC100158370		txndc11.L
ttbk2.L		bdp1.S
ccdc61.L		scyl2.S
rnf130.S		rlf.L
cab39l.L		cep76.L
gnaq.S		araf.L
kif2c.L		disp1.S
Xelaev18031388m		dnajb12.L
git2		pik3ca.S
tasp1.S		aak1.S
afg3l2		agap1.L
efcab14.S		fam134c.L
usp42.L		slc35e3.S
dock7.S		zar2.L
sec62.L		mthfr.L
dbf4.L		atad3a.L
oaf.L		c11orf24
zbtb41.L		arhgef17.L
tmem209.S		pex12.S
sav1.L		tanc2.L
frrs1.L		MGC83487
fam73a.L		tbk1.S
loc733735.L		ets1.S
adpgk.L		hprt1.L
ankle2.L		trit1.L
nde1.S		tmem131l.L
ptpn23.S		vps13c.L
aamp.L		atg4a.L
LOC108701166		katnb1.L
bad.L		ext1.S
srebf1.S		dync1li2.L
ncapd2.S		LOC100127316
rev3l.L		atg14.L
clasrp.L		LOC108709196
arl8b.L		mxd1.L
uso1.L		sptssb.L
azi2		sik3.L
rab27b.L		trim8.L
mpst		znf654.L
cap1.S		gpbp1l1.S
cspp1.L		tmem51.L
b4galt5.L		stambp.L
eloa		arl10b.L
lin28b.S		rlim.S
ddx19b.L		kmt2a.S
ccnl1		akap13.S
stk17a.L		mtmr3
bdp1.L		dgkh
fam102b.L		Xelaev18001402m
chd8.S		acot12.L
prdm10.L		chp1.L
med14.S		ppm1k.S
map3k10.L		ap5b1.L
sass6.L		pde10a.S
jmjd1c.L		fancm.L
usp31.L		cdc42ep2.L
ccdc15.S		alg11.L
sbds.L		gemin5
msantd2		MGC85120
tubgcp3.S		gpbp1l1.L
msl2.L		ulk2.L
lemd3.S		cdc25a.L
mlxip.L		klf12.L
ssbp2.S		ubn2.S
arhgef11.L		triobp.S
ncs1.L		pard6g.L
tiam1.S		filip1.L
ppip5k2.L		fkbp6.L
fmn2.L		stambp.S
ppp3cc.S		acap3.L
atrip.S		got2.L
zyg11b.S		ago1.L
stk24.S		spopl.S
tdrp.S		mief1.L
golgb1.S		abl2.L
ebag9.S		dusp22.S
wsb2.L		ccdc117
cdk8		fbxo46.S
plin3.S		mycl.L
top1.2.S		def8.S
dock9.L		kdm5b
klhdc10		tank.L
tmem104.S		mgll.L
igf2r.L		ei24.S
kif21a.L		usp37.L
stam.L		velo1.L
ankrd28		c1orf84.L
atrn.S		pou5f3.3.S
bud31.S		mfsd6.S
adgra3.L		glce.S
kif14.L		ino80d.L
wdfy3		nus1.L
lrrc16a.L		tbc1d10a.L
mier1.L		taf4b.S
dstyk.S		bcdin3d.L
fkbp4.L		znf292.L
ap2b1.S		arl6ip6.L
aaas.L		c14orf119.L
dnaaf5.S		sipa1l3.L
luzp1.S		csnk1d.L
fitm2.L		MGC115510
arhgap11a.1.L		grk3
hspbap1.L		syde2.L
casp8ap2		satb1.L
fez2.L		arhgef12.L
trmt13.L		wtip.S
cask.L		pou5f3.3.L
rps6ka3.L		picalm.1.L
znf839.L		atxn1l.L
lhfpl2.S		spsb4.L
smarcal1.L		arhgef18.S
tbc1d12.L		prr14.L
rapgef6.S		spg21.L
gemin2.S		peak1.L
kctd5.L		dolpp1.L
nusap1.S		casc4.S
		men1.L
		prkcsh.S
		plxna3.S
		b3gnt7.S
		rlf.S
		znf507.L
		mpp5.L
		tigd4
		mastl.S
		mtus1
		rnf112.1.S
		ptcd2.L
		rabgef1.L
		vps54.L
		sh2b3.L
		sik2.S
		smg8.S
		arhgef15.L
		kdf1.S
		fam208a.S
		ipmk.S
		mtmr3.L
		st3gal2.1.L
		LOC108704263
		suox.L
		stk10.L
		cyld.L
		plekha3.L
		scd.L
		loc100145507.S
		kiaa0922.S
		slc30a4.S
		tbc1d4.S
		tmtc3.L
		samd4b.L
		ttc31.L
		rab8b.L
		limch1.L
		nemp1.L
		dtx2.L
		bicc1.L
		zic2.L
		pak4.L
		fryl.S
		gtse1
		unc119.L
		snx4.S
		pikfyve.L
		rasa1.L
		rpa2.S
		mcm3ap.L
		prc1.S
		ptpn12.S
		snx17.L
		tmem57.L
		unnamed.S
		rnf19b.L
		kdm4c.S
		hmg20b.L
		sbf2.S
		pwwp2b.S
		rnf115.S
		ipmk.L
		ppp3cc.L
		jade3.L
		camsap2
		tcf7.S
		dnajb14.L
		rfx7
		ppp1r12a.L
		lysmd4.L
		e2f4.L
		fam214a.L
		sdc3
		otud7a.L
		pcmtd2.L
		c17orf53.L
		katnb1.S
		MGC79091
		rrm2.2.S
		tmem184b.L
		LOC100127794.L
		adgrl2.L
		araf.S
		nxf1
		wnk3.L
		ric1.S
		tmem57.S
		adcy6.S
		sbk1.L
		gnpat.S
		rnf219.L
		sel1l.S
		znf268
		chmp1a
		nus1.S
		tbp.L
		fer.L
		zfyve9.L
		golga1.L
		tnrc6c.S
		usp46.L
		top1mt-like.L
		dars2.L
		pigu
		mast4.S
		aip.L
		tubgcp5
		lamp2.L
		sytl2.S
		arhgap21.S
		fam193b.S
		cdc42bpb.L
		adam10
		brca2.L
		cbwd1.1.S
		map3k7.L
		rb1cc1.S
		loc100126636.S
		asxl3.L
		polg.L
		leprotl1.S
		snx11.L
		ip6k1.L
		slc6a14.2.L
		atp8b1.L
		ddx3x.L
		abcb6.L
		setbp1.S
		atp9b.L
		peli1.L
		rfx7.L
		gigyf2.L
		rnf220.1.L
		syne2
		pqlc1.1.S
		necap1.S
		rnf169.L
		baiap2l1.L
		xl64phr
		batf3.S
		rab8a.L
		rictor
		apitd1.L
		slc39a10.L
		arhgap32.L
		dnmbp.L
		dapk1.L
		ccnb2.L
		dip2a.S
		akap1
		mphosph9.L
		spopl.L
		fryl.L
		LOC108698716
		fkbp8.L
		ppp1r37.L
		aak1
		ipo13.S
		dcaf5.L
		pdzd2.S
		dcun1d3.L
		kpna4.L
		kmt2b
		kpnb1.L
		cdkn2aip.S
		suco.L
		pnisr.L
		pdpk1.L
		mau2.L
		cxcr4.L
		fnbp1l.L
		mast2.S
		eml1
		lbh.S
		secisbp2l.S
		c5orf24.S
		taf5l.S
		kdm4a.S
		klhl22.L
		dhx35.S
		dicer1.L
		bptf.L
		fnbp1l
		c16orf52.L
		xplcg1a
		dock4.L
		mcoln2.L
		phf14.L
		trim33.S
		mapk7.L
		zhx3.S
		c11orf95.L
		spin1.L
		pkn2.L
		hook3.L
		cgnl1.S
		akap1.S
		nfatc3.S
		ubap1.S
		rfc1.L
		phax.S
		smap2.L
		clint1.L
		ankrd49.S
		slc30a6.S
		slc39a9.L
		rhog-like.1.S

## Sheet: St10-10.5
Temporal DESeq Epi Neur Venn Diagram Gene Lists corresponding with Figure 3B
Total				Increase				Decrease
Epi Only	Neur Only	Overlap		Epi Only	Neur Only	Overlap		Epi Only	Neur Only	Overlap
lemd3.L	gcm1.L	kpna3.L		gata2.L	gcm1.L	gata2.S		lemd3.L	acadl.L	kpna3.L
pold2.L	cndp2	adnp.L		dlc.L	cndp2	col4a5.S		pold2.L	dnajc10.L	adnp.L
gabpb2.S	ccdc129.L	xk		szl.L	ccdc129.L	sspo.L		gabpb2.S	natd1.L	xk
mast3.L	LOC108711733	ddx3x.S		msx1.S	LOC108711733	scnn1a.S		mast3.L	aspm	ddx3x.S
trappc8.L	vtn.L	pard3.L		dbn1	vtn.L	cfh.L		trappc8.L	kiaa0513.L	pard3.L
trmt13.L	rai2.S	arhgap11a.1.L		szl	rai2.S	dock10.S		trmt13.L	esco1.L	arhgap11a.1.L
per3.S	Xelaev18002025m	zdhhc8.S		igfbp2	Xelaev18002025m	g0s2.L		per3.S	ptges2.L	zdhhc8.S
prkaa1.S	LOC108696785	rffl.L		zc3h12c.S	LOC108696785	ror2.L		prkaa1.S	dgcr2.S	rffl.L
kctd5.L	Xelaev18040848m	c1orf84.L		dll1.L	Xelaev18040848m	LOC108715896		kctd5.L	ctdsp1	c1orf84.L
dnajc14.S	moxd1.S	src.L		pax3.L	moxd1.S	lrp2.L		dnajc14.S	tspan14.L	src.L
eif6.L	foxd4l1.L	smagp.S		dlx5.L	foxd4l1.L	LOC100496293.L		eif6.L	bod1l1	smagp.S
hmbox1.S	hoxd10.L	ncoa4.S		fucolectin.S	hoxd10.L	pkdcc.1.L		hmbox1.S	smarca5	ncoa4.S
stam.L	LOC108699634	trmt6.S		ventx1.2.L	LOC108699634	capn8.S		stam.L	gdf9.L	trmt6.S
spag9	abca5.L	velo1.L		foxi4.1.S	abca5.L	runx1.L		spag9	cbfb.S	velo1.L
trib2.S	pgs1.L	pxn.L		figf.L	pgs1.L	gli2.S		trib2.S	tbc1d4.L	pxn.L
cdk8	LOC398451	wdr81.L		egfl6.L	LOC398451	pkdcc.1.S		cdk8	sat1.L	wdr81.L
nsd1.L	LOC108715640	rpgr.S		nuak1.L	LOC108715640	clca3.L		nsd1.L	slc25a44.L	rpgr.S
acot11	otx2.S	akap1		ventx1.1.L	otx2.S	sema6a.S		acot11	gpn3.L	akap1
nedd4l.S	actc1.S	ap2b1.S		kremen2.L	actc1.S	clcnkb		nedd4l.S	irak1.L	ap2b1.S
lamp1.L	plcb2.L	plekhf2.L		rgs2.L	plcb2.L	wfdc2.L		lamp1.L	rbfox2.S	plekhf2.L
itsn1.L	itga4.S	kif24.L		slc30a8.L	itga4.S	c3.L		itsn1.L	ripor1.L	kif24.L
armc1.L	rnf223.S	n4bp1.L		nptx2.S	rnf223.S	efnb3.L		armc1.L	lcor.L	n4bp1.L
pop4.L	LOC108717899	fem1b.L		LOC108716735	LOC108717899	elavl3		pop4.L	depdc1-b	fem1b.L
suv39h2.S	LOC108708225	ddx19b.L		axl.S	LOC108708225	wasf3		suv39h2.S	tle1.L	ddx19b.L
rnf25.L	LOC108707645	pkn2.L		dll1.S	LOC108707645	Xelaev18022564m		rnf25.L	taok3.L	pkn2.L
zfyve28-like.1.S	mid1ip1.S	adam10		arhgap6	mid1ip1.S	itgb8.L		zfyve28-like.1.S	snap23.L	adam10
phax.S	slfn13.L	rnf41.L		msx2.L	slfn13.L	map3k14.S		phax.S	actn4.S	rnf41.L
nde1.S	lrig1.L	smap2.L		fam212a.S	lrig1.L	crb2.L		nde1.S	smarca5.S	smap2.L
zc3h7a.L	myoc.L	eri1.L		foxi1.L	myoc.L	slco5a1.S		zc3h7a.L	LOC108701074	eri1.L
dpagt1.L	parp6.L	kctd6.L		gata3.L	parp6.L	afap1l2.L		dpagt1.L	ctdsp2.L	kctd6.L
txlng.S	Xelaev18002226m	tmc7.S		bambi.L	Xelaev18002226m	scnn1a.L		txlng.S	ppp1r9a.S	tmc7.S
apc.S	aqp3.S	spin1.L		MGC52622	aqp3.S	foxi4.1.L		apc.S	wdr41.L	spin1.L
b4gat1.L	kcnk1.S	usp9x.L		tph1.S	kcnk1.S	col8a1.L		b4gat1.L	amer1	usp9x.L
kdm5c.S	chgb.L	jmjd1c.L		adcy4.S	chgb.L	sds.S		kdm5c.S	zfp36l1	jmjd1c.L
top1.2.S	parp12	tcf7.S		tll1.S	parp12	atp1b2		top1.2.S	osbpl8.L	tcf7.S
tgs1.L	otog.L	bnip2.S		ptger4.S	otog.L	elavl3.L		tgs1.L	kdm4a.S	bnip2.S
akap17a.L	crx.L	kif1b.S		gprc5b.L	crx.L	map3k19.L		akap17a.L	csnk1d.L	kif1b.S
MGC78973	tmem56.2.L	map2k7.L		myo5b.L	tmem56.2.L	chrna2.S		MGC78973	gpi.L	map2k7.L
arl2.L	LOC108698246	gmnn.S		ptk2b.S	LOC108698246	azin2.S		arl2.L	tmem131.L	gmnn.S
clec16a.L	krt8.2.L	tyro3.L		chst1.S	krt8.2.L	LOC100487499.S		clec16a.L	lin9.L	tyro3.L
plekha1.L	Xelaev18000594m	slc20a2.L		ventx3.2.L	Xelaev18000594m	fblim1.L		plekha1.L	kdm3b.L	slc20a2.L
lrrfip2	fa2h.L	pdpk1.L		foxi4.2.L	fa2h.L	fgd1.S		lrrfip2	kiaa1671	pdpk1.L
smn2.S	fam169a.S	borcs7.S		fam167a.L	fam169a.S	LOC100496797.L		smn2.S	b3gnt4.L	borcs7.S
tubgcp3.S	LOC108707019	fcho2.L		fam167a.S	LOC108707019	myt1.S		tubgcp3.S	zhx3.S	fcho2.L
tmem209.S	irx3.S	rb1cc1.S		shroom3.L	irx3.S	scube2.S		tmem209.S	tram2.L	rb1cc1.S
oaf.L	otx2.L	wdfy3		id4.S	otx2.L	trpm8b.L		oaf.L	eml4.L	wdfy3
zswim1.S	emilin1.L	suco.L		pde7b	emilin1.L	cfb.L		zswim1.S	slbp.L	suco.L
nfxl1.L	Xetrov90015964m.S	homez.L		ccn1l.S	Xetrov90015964m.S	onecut2.L		nfxl1.L	znf131.L	homez.L
pex1.L	LOC108705860	zyg11b.S		sox18.S	LOC108705860	hsp90aa1.1.L		pex1.L	ube3c.L	zyg11b.S
phf3.L	LOC100486385.L	dars2.L		smad7.S	LOC100486385.L	LOC108699553		phf3.L	letmd1.L	dars2.L
cux1.S	stoml3	alkbh4.L		fam212a.L	stoml3	cdc14a.S		cux1.S	stim2.S	alkbh4.L
ptpn23.S	ddit3.S	sox13.S		vcan.L	ddit3.S	Xelaev18043700m		ptpn23.S	arfgap1.S	sox13.S
nfx1.S	kif1a	mief1.L		hesx1.L	kif1a	trim67.S		nfx1.S	kiaa0513.S	mief1.L
atrip.S	elovl3.L	edem3.L		pdlim4.L	elovl3.L	col4a5.L		atrip.S	herc3.L	edem3.L
appl2.L	foxn4.L	fbxl4.S		p2ry2.S	foxn4.L	myc.L		appl2.L	rev3l.L	fbxl4.S
fez2.L	amotl2.S	hgsnat.L		myt1.L	amotl2.S	tmem265.L		fez2.L	mtmr1.L	hgsnat.L
myo9b.S	olig4.L	slc9a1.L		LOC108704672	olig4.L	ltk		myo9b.S	kif22.L	slc9a1.L
Xelaev18046477m	ppp1r3e	srgap2.S		ventx1.1.S	ppp1r3e	Xelaev18013398m		Xelaev18046477m	slc9a7.S	srgap2.S
ubtd2.S	abcc8	dcaf5.S		pygm.S	abcc8	kalrn.L		ubtd2.S	tnfaip1.L	dcaf5.S
aaas.L	umod	tcf20.L		tmprss9.L	umod	cyp27a1.L		aaas.L	tmem184c.L	tcf20.L
lrrc28.L	il10rb.S	usp38.L		sema6a.L	il10rb.S	Xelaev18003060m		lrrc28.L	rraga.S	usp38.L
ankle2.L	Xetrov90002352m.L	tdrp.S		gm39120	Xetrov90002352m.L	sst.2		ankle2.L	trip11.L	tdrp.S
ins	st3gal5.L	cdc42bpb.L		Xelaev18027269m	st3gal5.L	il16.L		ins	zdhhc14	cdc42bpb.L
lpgat1.L	LOC108697411	mark4.L		arhgef19.L	LOC108697411	klf10.S		lpgat1.L	ralgapa1.S	mark4.L
fitm2.L	cyp27b1.L	igf2r.L		Xelaev18000128m	cyp27b1.L	LOC108712518		fitm2.L	rab21.L	igf2r.L
tcf19.L	fam3b.S	arf6.S		lmo4.2.S	fam3b.S	olfm4.L		tcf19.L	zbtb33.S	arf6.S
gmfb	LOC108698170	tapt1.S		meis2.S	LOC108698170	c9.L		gmfb	naa15.S	tapt1.S
gpr157.L	sptbn5	adam17.L		rreb1.L	sptbn5	celsr1		gpr157.L	limch1.L	adam17.L
mfsd5.S	LOC108708942	chd8.L		aifm3-like.L	LOC108708942	rflcii.L		mfsd5.S	rassf3.L	chd8.L
tubgcp5	heg1.S	sos2.L		LOC108698800	heg1.S	cdx2.L		tubgcp5	abcd1.L	sos2.L
tmem104.S	Xelaev18036730m	pid1.S		pcdh18.L	Xelaev18036730m	dazl.L		tmem104.S	atmin.L	pid1.S
c5orf24.S	myh6.S	inpp5b.L		slc9a3r2.L	myh6.S	arl8a.S		c5orf24.S	phlpp1.L	inpp5b.L
chd6.L	LOC108719253	c11orf95.L		sox18.L	LOC108719253	sacs		chd6.L	ubtd1.S	c11orf95.L
mier1.L	sytl2	ubl3.S		pkp3.S	sytl2	slc25a29.L		mier1.L	slc12a6.S	ubl3.S
samd4b.S	arl6ip1.L	ctif.L		arhgap33.L	arl6ip1.L	xepsin.L		samd4b.S	insrr.L	ctif.L
yae1d1.L	sds.L	eif6.S		insm1.S	sds.L	LOC108704223		yae1d1.L	nlk.L	eif6.S
bicd1.L	LOC101733073.L	fbxo45.S		lrrn1.S	LOC101733073.L	robo3.S		bicd1.L	rfwd2.L	fbxo45.S
afg3l2	cckar.L	atp10b		bambi.S	cckar.L	sulf1.L		afg3l2	ralgps2.L	atp10b
csrnp2.S	tfap2e.L	atp8b4.L		stard13.S	tfap2e.L	irx2.S		csrnp2.S	ankrd28	atp8b4.L
ppp1r12a.S	col4a1.L	akap9		gfpt1.L	col4a1.L	sbno2.L		ppp1r12a.S	picalm.1.S	akap9
bdp1.L	aqp4	impad1.S		rab11fip4	aqp4	LOC108706318		bdp1.L	cox5b.2.L	impad1.S
prss16.L	LOC108697464	dcp1a		tll1-like.1.L	LOC108697464	proser1.S		prss16.L	znf646.S	dcp1a
myo9b.L	prdm14.L	man2a2.L		sox8.L	prdm14.L	fam83c.S		myo9b.L	ndc1.S	man2a2.L
chd6.S	gpd1.L	ubr5.L		slc7a11	gpd1.L	txnip.L		chd6.S	rapgef1.S	ubr5.L
fnbp1l.L	LOC108698034	herc1.L		ventx2.1.L	LOC108698034	ccdc68.L		fnbp1l.L	aff1.L	herc1.L
foxn2.S	trpv6.L	pxn.S		ventx2.2.L	trpv6.L	apeh.L		foxn2.S	stx2.L	pxn.S
opa1.S	c22orf15.L	adnp.S		atp12a	c22orf15.L	plcd3.L		opa1.S	trim33.S	adnp.S
tbc1d12.L	LOC108716397	rnf13.S		mdk.S	LOC108716397	sgk1.L		tbc1d12.L	mgat4a.L	rnf13.S
usp32.L	rasgrp2.L	nup133.L		Xelaev18012294m	rasgrp2.L	cyp27a1		usp32.L	clp1.L	nup133.L
gpm6b.S	tuft1.L	ppp1r12a.L		MGC76328.L	tuft1.L	kcp.L		gpm6b.S	fam20b.L	ppp1r12a.L
Xelaev18003062m	LOC108714578	pdzd8.S		lgals3.S	LOC108714578	plekhs1		Xelaev18003062m	tmem110.S	pdzd8.S
cdc42ep2.S	MGC86547	mfsd14a		hnrnpr.L	MGC86547	unc93a.L		cdc42ep2.S	armt1.L	mfsd14a
cdt1.L	LOC108704569	vps13c.L		slc7a8.S	LOC108704569	alpl.L		cdt1.L	man1b1.L	vps13c.L
gemin2.S	pnliprp1	tex2.2.S		rgmb.S	pnliprp1	guca1a.S		gemin2.S	ppp1r15b.L	tex2.2.S
irf2bp2.L	olig4.S	ttc9.L		pcdh19	olig4.S	sall3.S		irf2bp2.L	cdon.S	ttc9.L
LOC108704196	ror1.S	prrg1.L		map3k1.S	ror1.S	arhgef3.1.S		LOC108704196	cops8.L	prrg1.L
rrm2.2.S	LOC100497556.L	nemp1.L		tbkbp1.S	LOC100497556.L	sgk1.S		rrm2.2.S	cachd1.S	nemp1.L
top3a.L	ldlr.S	slc39a9.L		foxi4.2.S	ldlr.S	LOC108715348		top3a.L	map4k4-like.L	slc39a9.L
samd4b.L	pax3.S	snx4.S		dnmbp.L	pax3.S	znf608.S		samd4b.L	mcm3ap.L	snx4.S
ovca2.S	bhlhe40.L	srgap2.L		dlx2.S	bhlhe40.L	LOC108710705		ovca2.S	poldip2.S	srgap2.L
cc2d1b.S	fam83f.S	ankhd1.S		nav2.L	fam83f.S	evpl.L		cc2d1b.S	wwp1.S	ankhd1.S
ccdc88a	LOC108720014	maz		atp1a3.L	LOC108720014	LOC100495010.S		ccdc88a	prkcsh.L	maz
dlg1	LOC108704653	scyl2.S		creb3l4.S	LOC108704653	dlx5.S		dlg1	cog3.L	scyl2.S
lemd3.S	dennd2a.L	gnai2.S		tbc1d24.2.S	dennd2a.L	arrdc3.L		lemd3.S	eea1.S	gnai2.S
brox.S	LOC108713742	tmem198.L		lfng.L	LOC108713742	gprc5cl1.L		brox.S	samd4a.L	tmem198.L
ikbkg.L	ubp1.L	tasp1.S		was.L	ubp1.L	dennd2c.L		ikbkg.L	rnf217.L	tasp1.S
hinfp.S	myb.S	rab8b.L		map3k13.L	myb.S	mst1.L		hinfp.S	hmgxb3.L	rab8b.L
c14orf119.L	kiaa1614.L	magi1.L		runx1	kiaa1614.L	socs3-like.1.L		c14orf119.L	inpp5f.L	magi1.L
mcm3.L	plat.L	clint1.L		Xelaev18003957m	plat.L	pdk4.L		mcm3.L	tubg1.S	clint1.L
mcm10.L	pou6f1.L	sec22a.L		notch1.L	pou6f1.L	tex264.S		mcm10.L	pik3r2.L	sec22a.L
celsr3	MGC84460.L	fam107b.S		ifnlr1	MGC84460.L	spsb3		celsr3	fasn.L	fam107b.S
idh3a.S	cfap58	bcdin3d.L		smad7.L	cfap58	slc35d2		idh3a.S	mpp6.L	bcdin3d.L
lpin1.L	tbx2.S	slc9a6.L		zswim4.S	tbx2.S	klf10.L		lpin1.L	asap2.L	slc9a6.L
LOC108710058	cdx1.S	hspa5.S		itga6.L	cdx1.S	sptbn4		LOC108710058	mfsd14b	hspa5.S
spopl.L	hcn4	pan3.S		fam193a.L	hcn4	rhebl1.L		spopl.L	nsd1.S	pan3.S
rab8a.L	helz2	pou2f1.L		ventx1.2.S	helz2	mxi1.L		rab8a.L	nck1.S	pou2f1.L
malt1	hipk2.S	ubap1.S		Xelaev18017221m	hipk2.S	crocc.L		malt1	hectd4.L	ubap1.S
dnajc16.S	cish.S	kpna4.L		hdac11	cish.S	pdgfa.L		dnajc16.S	ryk.S	kpna4.L
LOC108704268	cebpa.S	sys1.S		LOC108706094	cebpa.S	prkx.L		LOC108704268	nckipsd.S	sys1.S
msl2.L	ig100492381.L	arhgef7.S		grhl3.L	ig100492381.L	stat3.2.L		msl2.L	gtpbp1.S	arhgef7.S
sdhd.S	arhgap25.S	mios.L		LOC108715136	arhgap25.S	fzd2		sdhd.S	gid8.L	mios.L
znf684.S	loc108718659.S	cebpg.L		pcbp2.S	loc108718659.S	cebpd.S		znf684.S	znf143.L	cebpg.L
ppp1r14a.S	pxdc1.L	snx9.S		fabp3.S	pxdc1.L	dio3.L		ppp1r14a.S	ube2k.L	snx9.S
adgrg1.S	chrna2.L	snx27.S		rreb1.S	chrna2.L	Xelaev18038622m		adgrg1.S	lama5	snx27.S
dag1.S	hsf3	adam9.S		id2.L	hsf3	kiaa0232.S		dag1.S	psat1.L	adam9.S
bahcc1.S	cebpd.L	usp22.S		Xelaev18034047m	cebpd.L	ltbr		bahcc1.S	usp6nl.L	usp22.S
emsy.S	hs3st3a1.L	prc1.S		ccnd1.L	hs3st3a1.L	dhx58.L		emsy.S	blcap.S	prc1.S
ppip5k2.L	cdx2.S	MGC83487		scube2.L	cdx2.S	ggt1.L		ppip5k2.L	mcrip1.S	MGC83487
sdc3	pcdhga2	slc30a6.S		hdac7.L	pcdhga2	lin28a.L		sdc3	extl3.L	slc30a6.S
gxylt1.L	Xelaev18024458m	plxnb2.L		txnip.S	Xelaev18024458m	tubb2b.L		gxylt1.L	acvr1.L	plxnb2.L
LOC108703835	col4a6.L	zcchc11.S		id3.S	col4a6.L	LOC108719506		LOC108703835	LOC108704685	zcchc11.S
pcdh1.S	slc4a1.S	pik3ca.L		kcnk5.S	slc4a1.S	lsp1.S		pcdh1.S	znf618.S	pik3ca.L
fam208b.S	Xelaev18017186m	smtnl2.S		gfpt1.S	Xelaev18017186m	galnt7.S		fam208b.S	pik3c2a.S	smtnl2.S
hipk3.S	cxorf21.S	slc7a6os.L		hes4.L	cxorf21.S	ervfrd-1		hipk3.S	ubr3.L	slc7a6os.L
mapkapk5.S	zic4.L	vcpip1.S		rasd1.S	zic4.L	LOC108710017		mapkapk5.S	rilp.S	vcpip1.S
znf268	muc17	plxnb2.S		Xelaev18009838m	muc17	cfap206.L		znf268	atp13a1.L	plxnb2.S
snx1.S	fcn2	pef1.S		id3.L	fcn2	kiaa1324.S		snx1.S	atg13.S	pef1.S
jade3.L	krt18	tmtc3.L		abca1.L	krt18	trarg1.L		jade3.L	dact1.L	tmtc3.L
furin.L	cnnm1.L	socs5.L		mafb.L	cnnm1.L	ugcg.S		furin.L	pid1.L	socs5.L
napg.L	nr1i3.L	tead1.S		LOC108706543	nr1i3.L	sox9.L		napg.L	rnf19a.S	tead1.S
rab8a.S	pts.S	snx7.L		abca1.S	pts.S	rbms2.L		rab8a.S	loc733726.L	snx7.L
tbc1d12.S	krt.L	vangl2.S		fgf8.S	krt.L	tubb4b.L		tbc1d12.S	MGC83970	vangl2.S
zfhx2.S	irf8.S	mgea5.S		arhgap39	irf8.S	klf9.L		zfhx2.S	usp9x.S	mgea5.S
mphosph6.L	c17orf58.L	fam20b.S		bbip1.S	c17orf58.L	MGC82975		mphosph6.L	LOC108719553	fam20b.S
tradd.L	card9.L	suox.L		sptbn5.L	card9.L	zswim5		tradd.L	birc6.S	suox.L
hspbap1.L	slc16a6.S	Xelaev18031388m		rhou	slc16a6.S	creb3l2.L		hspbap1.L	gtf2ird1.S	Xelaev18031388m
usp37.L	lypd6.L	slc15a4.S		hexim1.S	lypd6.L	fth1.S		usp37.L	rexo1.L	slc15a4.S
sorl1.L	plekhf1.S	asb6.S		kit.L	plekhf1.S	ralgds.S		sorl1.L	eml1	asb6.S
ankrd40.S	casp7	slc6a14.2.L		Xelaev18011097m	casp7	mig30.L		ankrd40.S	ptpn13.L	slc6a14.2.L
pard6b.S	s1pr5.L	slc30a7.L		gas2l1.L	s1pr5.L	gpr143.L		pard6b.S	atrn.L	slc30a7.L
brf2.S	Xelaev18009606m	rnf220.1.L		loc100487575.L	Xelaev18009606m	ras-dva1.L		brf2.S	csgalnact2.L	rnf220.1.L
ism1.L	lhx3.S	nus1.S		nrarp	lhx3.S	tuba3c.S		ism1.L	fignl1.L	nus1.S
ddx3x.L	Xelaev18009532m	LOC108701166		ier5l.L	Xelaev18009532m	kitlg.L		ddx3x.L	hectd4.S	LOC108701166
azi2	clic3.L	znf436		eif4a2.L	clic3.L	LOC108702458		azi2	tnpo1.L	znf436
cab39l.L	gpr65.L	rab31.L		pcdh7.L	gpr65.L	fgd1.L		cab39l.L	ppp1r15b-like.S	rab31.L
klhl15.L	gpr65.S	xl64phr		LOC108715172	gpr65.S	LOC108713945		klhl15.L	timm50.L	xl64phr
pkd2.L	bcl3.L	bdp1.S		hspbp1.L	bcl3.L	vgll4l.L		pkd2.L	habp4.S	bdp1.S
plin3.S	myom1.L	dicer1.L		cd99l2.S	myom1.L	alcam.S		plin3.S	gpr155.L	dicer1.L
LOC108710728	Xelaev18008189m	rpa2.L		smad4.1.L	Xelaev18008189m	slc7a5.S		LOC108710728	vps53.S	rpa2.L
pprc1.L	shbg.L	mtus1		prickle2.L	shbg.L	itpka		pprc1.L	usp49.S	mtus1
r3hdm4.S	socs4.L	tnrc6b.L		tnip2.S	socs4.L	ranbp3l.L		r3hdm4.S	ubl3	tnrc6b.L
LOC108703778	hoxd9.L	itsn2		tox3.L	hoxd9.L	LOC100490918.L		LOC108703778	sh3bp5.L	itsn2
map3k10.L	syt10	ube2j2.L		esr-5.L	syt10	msi1.S		map3k10.L	dennd4c.S	ube2j2.L
cptp.L	il10rb.L	pcmtd2.L		hhip.L	il10rb.L	myo9a		cptp.L	oxct1.L	pcmtd2.L
prr14.L	stard10.L	LOC108716761		LOC108711841	stard10.L	LOC108695513		prr14.L	xvent-2b	LOC108716761
cep164.L	cish.L	fam193b.S		ventx2.1.S	cish.L	apoc1-like.L		cep164.L	mzt2b	fam193b.S
dpf2.L	dst	ipo13.S		rhou.L	dst	mcf2l		dpf2.L	atp10d.L	ipo13.S
tdrd6.L	flt4	snph.S		rbm12.L	flt4	mypop.S		tdrd6.L	adam10.S	snph.S
spty2d1.S	loc100497729.L	kif18a.L		s100a2	loc100497729.L	cass4.S		spty2d1.S	ccpg1.S	kif18a.L
eme1.L	rbms2.S	ap5b1.L		LOC108698352	rbms2.S	sp6.L		eme1.L	rad54l	ap5b1.L
parl.L	LOC108717350	ubn2.S		post7p.L	LOC108717350	serpinh1.S		parl.L	csk.L	ubn2.S
katnb1.S	LOC108697654	pard6g.L		lypd2.L	LOC108697654	otud1.L		katnb1.S	c16orf46	pard6g.L
rab5c.L	socs2.L	rassf2.L		slc2a1.L	socs2.L	zswim5.S		rab5c.L	aen.L	rassf2.L
arl10b.L	fosl1.S	batf3.S		itprip.S	fosl1.S	znf451		arl10b.L	gnpat.S	batf3.S
arl9.L	foxc2.S	chp1.L		timp3.L	foxc2.S	prss8		arl9.L	grhl1.S	chp1.L
fam46c.L	ldlr.L	ccny.L		fdps.L	ldlr.L	LOC100127323		fam46c.L	mia3-like.1.L	ccny.L
zer1.L	upp2.L	rfc1.L		efna1.L	upp2.L	rap2b.L		zer1.L	nos1ap	rfc1.L
vps16.S	rnd3.L	nsmaf.L		klf5.S	rnd3.L	ptch1.L		vps16.S	gid4.S	nsmaf.L
racgap1.S	arg2.L	cbx2.S		vasn.S	arg2.L	top2b.S		racgap1.S	loc733735.L	cbx2.S
luzp1.S	cldn5.S	orai2.S		e2f7.L	cldn5.S	fosl2.S		luzp1.S	zar2.L	orai2.S
scarb2.S	aacs.L	mfsd11.S		LOC108698461	aacs.L	tsc22d3.L		scarb2.S	slc29a3.S	mfsd11.S
vps54.L	arhgef3.2.L	grk3		pcdha13.L	arhgef3.2.L	tceb3.S		vps54.L	lcor.S	grk3
ide.S	bag3.S	mphosph9.L		notch1.S	bag3.S	cnfn.1.L		ide.S	dbf4b.L	mphosph9.L
ing2.S	zfp36.S	mau2.L		lrp10.L	zfp36.S	arrdc3.S		ing2.S	unnamed.S	mau2.L
ptpn12.S	rarg.L	btbd3.S		phldb3.S	rarg.L	arl4a.S		ptpn12.S	ssh2	btbd3.S
ado.L	ampd3.L	svil.L		vim.L	ampd3.L	lrrc75b		ado.L	dcun1d5.S	svil.L
pign.S	LOC100036994	ube3a.L		isg20l2.S	LOC100036994	ist1		pign.S	naa25.S	ube3a.L
LOC108719543	crx.S	pwwp2b.S		Xelaev18006061m	crx.S	hpgd.L		LOC108719543	rock1.S	pwwp2b.S
tbc1d10a.L	ckap4.S	bach1.S		sbno2.S	ckap4.S	fgfr2.L		tbc1d10a.L	nr1i2.S	bach1.S
fbxo45.L	col9a3.L	gcc1.L		hexim1.L	col9a3.L	melk.L		fbxo45.L	strada.L	gcc1.L
Xelaev18023494m	ptprj	carkd.S		cdc25b.L	ptprj	acod1		Xelaev18023494m	hs2st1.S	carkd.S
bcl9l.S	gata5.S	pdik1l.L		march7.S	gata5.S	dedd2.L		bcl9l.S	glce.L	pdik1l.L
LOC108704532	fer1l4	ppp3cc.L		stx8.L	fer1l4	ptma.L		LOC108704532	twsg1.L	ppp3cc.L
mtmr10.S	dgki	plekhg4.L		sertad1.S	dgki	MGC82544		mtmr10.S	nlk.S	plekhg4.L
tbc1d9b	LOC108695812	mark1.L		prom1.L	LOC108695812	cxcl10.L		tbc1d9b	ninl.L	mark1.L
capn15.L	LOC101243550	vps50.L		erbb3.S	LOC101243550	zmcm3.L		capn15.L	mpst	vps50.L
insrr.S	alk	anapc13.1.L		mlec.L	alk	ralb		insrr.S	phlpp1.S	anapc13.1.L
oaf.S	foxd3.L	zbtb33.L		loc728026.L	foxd3.L	khdc4		oaf.S	kdf1.L	zbtb33.L
wdr90.L	nhs.L	znf646.L		hist1h2aj.L	nhs.L	foxj1.S		wdr90.L	dctn4.L	znf646.L
fntb.S	srpk2.S	sesn2.S		mxi1.S	srpk2.S	LOC108698354		fntb.S	znf516.L	sesn2.S
dgke.S	erbb3.L	brca2.L		Xelaev18001619m	erbb3.L	lrig2.L		dgke.S	rnf130.S	brca2.L
med26.L	Xelaev18000483m	mfsd13a.S		gadd45a.L	Xelaev18000483m	srsf7.L		med26.L	MGC83705	mfsd13a.S
crls1.S	dusp11.2.L	katnb1.L		herpud1.S	dusp11.2.L	cdk5r1.L		crls1.S	znf518b.L	katnb1.L
cnot8.S	rbbp8nl.L	stambp.L		unc50.S	rbbp8nl.L	plk2.L		cnot8.S	dag1.L	stambp.L
stard7.S	MGC68910	cdc6.S		MGC81482	MGC68910	entpd2.S		stard7.S	kbtbd3.S	cdc6.S
mex3d.S	LOC100489607.1	klhl7.S		pou5f3.2.L	LOC100489607.1	loxl1.L		mex3d.S	dtna.L	klhl7.S
ak3.L	tnik	pdzd2.S		abcb5	tnik	atp6a1		ak3.L	tbc1d8b.L	pdzd2.S
evi5.S	krt5.7.S	cap1.S		akap2.S	krt5.7.S	cfap52.L		evi5.S	itpkc.S	cap1.S
LOC108704248	atf3.L	cdc42bpb		hspa8.L	atf3.L	slc25a34.L		LOC108704248	dck.1l.L	cdc42bpb
taf9b.L	akap6-like.S	znf507.L		znf740.S	akap6-like.S	rbl1.L		taf9b.L	trim33.L	znf507.L
znf423.L	dnai2.S	aebp2.S		btg1.L	dnai2.S	alcam.L		znf423.L	trit1.L	aebp2.S
slc20a1.S	nfe2l2.L	sbf2.S		kirrel2.L	nfe2l2.L	xicl		slc20a1.S	txn2.S	sbf2.S
pacs1.L	mn1.L	ccnyl1.S		gadd45g.L	mn1.L	pabpc4.L		pacs1.L	bptf.S	ccnyl1.S
hps6.L	rap1gap.L	arg-a		phldb3.L	rap1gap.L	irg1.L		hps6.L	xzar2	arg-a
pqlc1.1.S	tmem238.S	stambp.S		ppp1r8.L	tmem238.S	birc2.S		pqlc1.1.S	btbd2.S	stambp.S
prkcsh.S	suox.S	lrif1		zfhx3.L	suox.S	actb.L		prkcsh.S	arhgef11.S	lrif1
cbwd1.1.S	LOC105945479.S	cgnl1.S		gfod1.S	LOC105945479.S	efnb2.L		cbwd1.1.S	vangl2.L	cgnl1.S
sbk1.L	ap1m2.L	vps26b.S		hspa8.S	ap1m2.L	e2f8.L		sbk1.L	MGC115510	vps26b.S
ints6.S	tfec	alg11.L		myl9.L	tfec	eef1a1o.S		ints6.S	acvr2b.S	alg11.L
espl1.L	pcdh8l.L	eea1.L		rpl26.S	pcdh8l.L	prnp.S		espl1.L	slc25a36.S	eea1.L
mov10l1.L	Xelaev18039754m	apcdd1.L		csrnp1.L	Xelaev18039754m	pars2.L		mov10l1.L	znf821.S	apcdd1.L
mcoln2.L	LOC108716727	znf526.L		dynll1.L	LOC108716727	lsm14b.L		mcoln2.L	dnajc13.L	znf526.L
arhgef11.L	mvp.S	morf4l1.L		fgd4.L	mvp.S	egln3.L		arhgef11.L	cep85l.L	morf4l1.L
mfsd13a.L	gch1.L	fut8.S		rps21.S	gch1.L	slc7a3.L		mfsd13a.L	daam1.S	fut8.S
psme3.S	Xelaev18004563m	rhog-like.1.S		ctps1.L	Xelaev18004563m	mcm6.2.L		psme3.S	ppp2r5e.L	rhog-like.1.S
zbtb41.L	tgif1.S	tmcc2.S		tra2a.S	tgif1.S	pcf11.S		zbtb41.L	abhd13.L	tmcc2.S
crtc3.S	prdm14.S	ccdc186.L		sh3bp5l.L	prdm14.S	brd2.S		crtc3.S	mef2d.L	ccdc186.L
gpi.S	armc1	fam69a.L		ago2.L	armc1	admp2.L		gpi.S	med4.S	fam69a.L
axin1.L	gpr4.S	ranbp2.S		fam110c.L	gpr4.S	e2f3.L		axin1.L	alg12.L	ranbp2.S
fchsd2	tcim.L	wdr37.L		lamc1.S	tcim.L	asb7.L		fchsd2	nr2c1.L	wdr37.L
znf526.S	LOC108712218	ipmk.S		grpel2.L	LOC108712218	acod1l.L		znf526.S	fry.L	ipmk.S
borcs6.S	cttnbp2.S	rab9a.L		cox7c.S	cttnbp2.S	rnf223.L		borcs6.S	gcc1.S	rab9a.L
spryd3.S	alg14.S	b3gnt7.S		LOC108710532	alg14.S	herpud1.L		spryd3.S	ccdc88a.S	b3gnt7.S
men1.L	LOC108701168	arhgap26.S		rps9.L	LOC108701168	efnb2.S		men1.L	bnip1.S	arhgap26.S
narf.L	fzd8.S	slc39a10		aim1.S	fzd8.S	zfand5.L		narf.L	trpm7.L	slc39a10
agap1	emp2.S	snx17.L		rpl26.L	emp2.S	efna1.S		agap1	bcl11a.L	snx17.L
pip4k2b.S	LOC108719541	pigv.S		cpne3.L	LOC108719541	hspg2.L		pip4k2b.S	atg14.L	pigv.S
dph6.L	arg2.S	ganab.L		Xetrov90029963m.L	arg2.S	tgif2.L		dph6.L	fkbpl.S	ganab.L
kif1b.L	ranbp3l.S	traf3ip1.S		plekhg3.L	ranbp3l.S	nradd.L		kif1b.L	nckipsd.L	traf3ip1.S
klhl21	spred1.L	nus1.L		svbp.S	spred1.L	arnt.S		klhl21	kiaa0355.S	nus1.L
nrip1.S	ccnd1.S	ythdf3.S		rps3a.L	ccnd1.S	sh3bp4.L		nrip1.S	rlim.S	ythdf3.S
ercc8.S	LOC108695521	MGC85180		dyrk3.L	LOC108695521	vwa5a.L		ercc8.S	usp46.S	MGC85180
cidec.L	ras-dva1.S	e2f4.S		rps4	ras-dva1.S	tfcp2l1.L		cidec.L	tpcn1.L	e2f4.S
tmem51.S	LOC108710853	rasal2.S		parp1.L	LOC108710853	cass4.L		tmem51.S	kat2b	rasal2.S
surf1.L	angpt4.S	mpp5.L		pbx1.L	angpt4.S	rbm14.L		surf1.L	pag1.L	mpp5.L
znf234.L	znf703.L	ate1.L		LOC108708564	znf703.L	atf4.S		znf234.L	grb10.L	ate1.L
tada3.S	egln3.S	dpp9.L		pou5f3.2.S	egln3.S	e2f7.S		tada3.S	Xelaev18024710m	dpp9.L
rps6ka3.L	zhx1.S	btbd9.S		ahnak.L	zhx1.S	mlec.S		rps6ka3.L	tnfaip8.L	btbd9.S
haus6.L	hap1.S	atp2c1		rpl7.L	hap1.S	cables2.L		haus6.L	cry1.L	atp2c1
cpeb2-like.S	LOC108704231	atp8b1.L		mcl1.L	LOC108704231	ppp1r10.L		cpeb2-like.S	rfwd2.S	atp8b1.L
dusp22.S	znf608	dolpp1.L		hmgn2.L	znf608	map3k1.L		dusp22.S	styx.S	dolpp1.L
scyl2.L	pcdh8l.S	dcaf5.L		MGC83421	pcdh8l.S	prelid1.S		scyl2.L	spast.L	dcaf5.L
b4galt5.L	LOC100489887.L	agap1.L		ubc.L	LOC100489887.L	litaf.L		b4galt5.L	ccdc117	agap1.L
rnf169.L	LOC108718942	sh2b3.L		noc4l.S	LOC108718942	timp3.S		rnf169.L	wdr77.S	sh2b3.L
heatr5a.L	plekhn1.S	arhgap21.L		wdr43.L	plekhn1.S	gsk3b.L		heatr5a.L	zbtb37.S	arhgap21.L
depdc7.S	flrt2.S	slc39a10.L		LOC108709832	flrt2.S	srsf7.S		depdc7.S	arhgap32.S	slc39a10.L
fgfr3	nxpe4.S	cracr2b.L		gm20188	nxpe4.S	tra2a.L		fgfr3	xpo4.L	cracr2b.L
birc7.L	slc16a6.L	rictor		hmg-17	slc16a6.L	fth1a		birc7.L	aip.L	rictor
eif2ak1.L	prrt1.L	slc22a23.S		dzip1.L	prrt1.L	dido1.L		eif2ak1.L	LOC108719552	slc22a23.S
znf782.S	LOC108701422	acot12.L		tubb.L	LOC108701422	znf101		znf782.S	mtss1.1.S	acot12.L
myc.S	LOC108704423	cep350.S		rps2	LOC108704423	sppl3.L		myc.S	cachd1.L	cep350.S
kctd3.S	atoh1.S	apc.L		rpl37.S	atoh1.S	znf592.L		kctd3.S	elmod3.S	apc.L
lrr1.L	LOC108698113	phf19.S		rpl31.L	LOC108698113	cltc.L		lrr1.L	rps6ka6	phf19.S
sash1.S	jund.S	usp34.L		rpl17.L	jund.S	LOC108696887		sash1.S	LOC108710061	usp34.L
ube2z.S	parp12.L	pigc.L		awat1.L	parp12.L	rps2.L		ube2z.S	ripk4.L	pigc.L
znf654.L	il6st.S	dtx2.L		kdm2a.S	il6st.S	socs3-like.1.S		znf654.L	lrp8.L	dtx2.L
nin.L	LOC100486385.S	arid4b.L		rps12.L	LOC100486385.S	unknown.S		nin.L	fbxo10.L	arid4b.L
tmem5.S	mbd6.L	triobp.S		mkrn2.L	mbd6.L	fbxl20.S		tmem5.S	cyp27c1.S	triobp.S
plekhg1.S	btg2.S	ptcd2.L		rpl7a.S	btg2.S	hist2h2ab.S		plekhg1.S	pex10.L	ptcd2.L
zfyve1.L	krt.S	fam46b.L		faxc.L	krt.S	ints6l		zfyve1.L	asxl3.L	fam46b.L
spire1.S	cdh1.S	mthfr.L		tmem111.L	cdh1.S	fosl2.L		spire1.S	ttbk2.L	mthfr.L
ppp1r13b.L	n4bp3.L	fbxl18.L		pmel.S	n4bp3.L	cdc34.S		ppp1r13b.L	uvrag.L	fbxl18.L
ext1.S	dydc1.L	sel1l.S		srsf2.S	dydc1.L	loc108648340.L		ext1.S	derl2l.L	sel1l.S
rapgef6.S	cebpa.L	mgat2.S		atp1a1.L	cebpa.L	slc7a5.L		rapgef6.S	med13l.L	mgat2.S
ccng2.L	bcorl1.L	smg7.L		hp1bp3.L	bcorl1.L	actb.S		ccng2.L	rapgef1.L	smg7.L
trpv4.L	itpr3	dapk1.L		MGC81028	itpr3	ptma.S		trpv4.L	pxk.S	dapk1.L
rnf145.S	entpd2.L	tprn		rps27a.S	entpd2.L	vezf1.S		rnf145.S	grasp.L	tprn
fbxo31.L	crebl2.L	ncoa3.S		LOC108695506	crebl2.L	wee1.S		fbxo31.L	chd8.S	ncoa3.S
LOC108703844	itprip.L	hells.S		anxa4.L	itprip.L	cbx5.L		LOC108703844	snx16.L	hells.S
ankrd52.L	LOC108717895	cers5.L		rpl36a.S	LOC108717895	prdm15.S		ankrd52.L	spg11.L	cers5.L
kiaa1715.L	maff.L	anapc7.L		hnrnpa0.L	maff.L	unkl.L		kiaa1715.L	mef2d.S	anapc7.L
pikfyve.L	zfand5.S	chst8.L		srrt.L	zfand5.S	rabgap1l.L		pikfyve.L	pcyox1.L	chst8.L
ccdc64.L	gprc5c.L	lbh.S		eif5a.L	gprc5c.L	gla.S		ccdc64.L	vps18.S	lbh.S
klhdc10	nr2f6.L	sertad2		gtpbp4.L	nr2f6.L	ssfa2.L		klhdc10	taok3.S	sertad2
kbtbd8.S	b3gnt2.S	fam21a.L		kbtbd7.L	b3gnt2.S	capzb.L		kbtbd8.S	cep126	fam21a.L
tank.S	st6galnac2.L	LOC108704624		luc7l2	st6galnac2.L	slc2a1.S		tank.S	ankib1.S	LOC108704624
LOC108695520	LOC108707322	ankib1.L		rps19.S	LOC108707322	smg1.L		LOC108695520	cep97.L	ankib1.L
rabgef1.L	LOC108711579	fryl.L		psmd1.S	LOC108711579	irx2.L		rabgef1.L	kif6	fryl.L
dop1a	mars2	zbtb5.S		rpl17.S	mars2	pin4.L		dop1a	abcc6.L	zbtb5.S
edc3.L	LOC108698396	bptf.L		mdk.L	LOC108698396	dgat1.L		edc3.L	prickle4.S	bptf.L
fnip1.L	prkcd	lifr.S		mapre1.S	prkcd	ctps1.S		fnip1.L	LOC108699992	lifr.S
chic2	Xelaev18042112m	fkbp6.L		msl1.S	Xelaev18042112m	calr.L		chic2	lhfpl2.S	fkbp6.L
sh2b1.S	vim.S	fam134c.L		mzt1.S	vim.S	rap2b.S		sh2b1.S	zwilch.S	fam134c.L
setbp1.S	fzd3.S	akap13.S		rpl37a.L	fzd3.S	upk1a.L		setbp1.S	nfatc3.S	akap13.S
asxl3.S	Xelaev18026162m	dcun1d3.L		cwc25.L	Xelaev18026162m	ubb.L		asxl3.S	LOC108707483	dcun1d3.L
cbwd1.1.L	yrdc	arhgap21.S		arpc5l.L	yrdc	sec14l1.L		cbwd1.1.L	tspan33.L	arhgap21.S
usp44.L	LOC108709387	rnf8.L		rplp2.L	LOC108709387	hnrnpl.L		usp44.L	ap4e1.S	rnf8.L
blm.S	Xelaev18006613m	amfr.S		rpl36.S	Xelaev18006613m	ilf2.L		blm.S	prex1.S	amfr.S
LOC108703749	hes3.1.L	snx10.L		snrnp200.S	hes3.1.L	spata13.S		LOC108703749	ndrg4.S	snx10.L
slc39a13.S	wee2a	polg.L		hdlbp.L	wee2a	hist2h3d.L		slc39a13.S	znf462.L	polg.L
dact1.S	LOC108699848	rnf19a.L		ppp1cb.L	LOC108699848	LOC108718087		dact1.S	syne2	rnf19a.L
sec24b.L	Xelaev18001646m	zbtb16.S		tpt1.L	Xelaev18001646m	sbno1.L		sec24b.L	rhbdf2.L	zbtb16.S
mastl.S	LOC108696832	lysmd4.L		rpf1.L	LOC108696832	u2af1.S		mastl.S	tnpo2.S	lysmd4.L
c14orf166.S	nox1	inf2.L		loc100494818.L	nox1	psmc5.L		c14orf166.S	palb2.L	inf2.L
pik3r3.S	ttf2.S	rcbtb1.S		sec61g.L	ttf2.S	fam32a.L		pik3r3.S	icmt.S	rcbtb1.S
trim39.L	LOC108714507	setbp1.L		rps20.S	LOC108714507	krt8.S		trim39.L	arrdc4.L	setbp1.L
b4galnt4.S	pik3ip1.L	ankrd13c.S		rps5.L	pik3ip1.L	sf3b2.S		b4galnt4.S	dennd5b.L	ankrd13c.S
sp5l.L	sdc4.L	slc35a5.S		loc100135138.S	sdc4.L	fxyd3		sp5l.L	slc4a11.S	slc35a5.S
golga5.L	map1lc3b	cenpl.S		sptan1.S	map1lc3b	gldc.S		golga5.L	pard6g.S	cenpl.S
pde6d.L	mpzl1.S	foxh1.L		sec61a1.S	mpzl1.S	ppig.L		pde6d.L	fam171a1.S	foxh1.L
orc1.L	pou5f3.1.S	dip2a.S		rps5.S	pou5f3.1.S	glul.S		orc1.L	nf1.S	dip2a.S
zbtb8b.L	pcdh8.S	usp22 a		otud6b.L	pcdh8.S	hmgn3.L		zbtb8b.L	znf577.L	usp22 a
atp6v0a2.L	mtx1.S	rnf139.S		mtmr12.L	mtx1.S	odc1.L		atp6v0a2.L	tns3.L	rnf139.S
ccdc126.S	fam46a.L	abcb6.L		LOC108695696	fam46a.L	arf4		ccdc126.S	tcp1.S	abcb6.L
cyp1a1.S	upk2.S	pxylp1.S		xvent-2b	upk2.S	rbm8a.L		cyp1a1.S	cmtm4.S	pxylp1.S
rlf.L	tubb4b.S	c6orf120.L		rps8.S	tubb4b.S	erh.L		rlf.L	diablo.S	c6orf120.L
ppp2r2d	arhgap29.L	pde8a		rpl7a.L	arhgap29.L	MGC80893		ppp2r2d	rbm38.L	pde8a
depdc4.L	pmm2.L	usp32.S		sumo2.L	pmm2.L			depdc4.L	ush1g.L	usp32.S
tnks2.S	f3.L	LOC108705734		rpl15.L	f3.L			tnks2.S	tnrc6b.S	LOC108705734
LOC108709941	cebpb.S	znf26		spint2.L	cebpb.S			LOC108709941	gatsl3.L	znf26
loc733556.L	LOC108699904	atxn1l.L		rpl10a.S	LOC108699904			loc733556.L	pgat.L	atxn1l.L
LOC108704260	gmps.L	rel.S		anxa7.L	gmps.L			LOC108704260	atxn7l3.L	rel.S
tmem63a.S	tmem79.S	adnp2.L		vapb.L	tmem79.S			tmem63a.S	ormdl1.S	adnp2.L
atp8a1.L	mnt.L	mid1.L		prpf8.S	mnt.L			atp8a1.L	zfyve28.L	mid1.L
fam83g.L	jun.S	ccdc186		cpsf1	jun.S			fam83g.L	tmem104.L	ccdc186
pym1.S	mybl1.S	fntb.L		zcchc9.L	mybl1.S			pym1.S	rmnd5a.L	fntb.L
mapkbp1.L	znf282	ppp1r37.L		dhx29.L	znf282			mapkbp1.L	gse1.L	ppp1r37.L
apaf1.L	gnb3.L	srebf2.L		snrpd1.L	gnb3.L			apaf1.L	shroom4.L	srebf2.L
LOC108699896	maff.S	ube2j2.S		gatd3b	maff.S			LOC108699896	fbxl12.L	ube2j2.S
adcy9.S	MGC82989	tor2a.L		hsp90ab1.S	MGC82989			adcy9.S	n4bp3.S	tor2a.L
map7d2	uqcrq.S	kmt2b		txnrd3.L	uqcrq.S			map7d2	gigyf2.S	kmt2b
rita1.S	krt5.7.L	usp31.L		ncapg.L	krt5.7.L			rita1.S	asap2.S	usp31.L
tbc1d25.S	ccnb3.S	tigd4		rpl23a.L	ccnb3.S			tbc1d25.S	dolpp1	tigd4
dnajc16.L	fam3b.L	rgs12.S		gltscr2.L	fam3b.L			dnajc16.L	mocs2	rgs12.S
galnt4.L	atf3.S	tank.L		glul.L	atf3.S			galnt4.L	slc15a4.L	tank.L
gcnt1.L	acta2.L	ets1.L		supt5h.S	acta2.L			gcnt1.L	slc23a2.L	ets1.L
fbxl3.L	nat9.S	Xelaev18001402m		fkbp1a.S	nat9.S			fbxl3.L	arhgap32.L	Xelaev18001402m
Xelaev18031390m	bmi1.L	atl2-like.S		rpl13a.S	bmi1.L			Xelaev18031390m	tmem169.L	atl2-like.S
tmem259.S	upk3b.L	spryd3.L		hnrnpll	upk3b.L			tmem259.S	lysmd4.S	spryd3.L
pak4.L	fzd2.S	tmem110.L		elob	fzd2.S			pak4.L	mark1.S	tmem110.L
slc25a44	aasdh.L	arhgef15.L		wbp11.S	aasdh.L			slc25a44	LOC108700013	arhgef15.L
efcab14.L	jun.L	nap1l4.S		tuba1c.L	jun.L			efcab14.L	cacul1.S	nap1l4.S
c17orf53.L	cdk1.S	cited2.L		smarcc1.S	cdk1.S			c17orf53.L	id3.L	cited2.L
exd1.L	gramd3.L	rnf19b.S		eif4g2.L	gramd3.L			exd1.L	wtip.S	rnf19b.S
rnf44.S	cldn23	dapk1.S		eif1b	cldn23			rnf44.S	patz1.S	dapk1.S
retreg3	xpnpep1.L	gtpbp2.L		ran.S	xpnpep1.L			retreg3	foxr1.L	gtpbp2.L
irf9.L	hic2.S	smc5.S		naa20.S	hic2.S			irf9.L	itpkc.L	smc5.S
rad51c.L	ngfr.S	fryl.S		pmpca.S	ngfr.S			rad51c.L	fer.S	fryl.S
myo19.S	LOC108697537	zdhhc9.L		dhx9.L	LOC108697537			myo19.S	cog1.S	zdhhc9.L
loc100216027.L	napb	pik3r2.S		h3f3c.L	napb			loc100216027.L	ing3.L	pik3r2.S
qrich1.1.S	etaa1.S	LOC108695565		MGC84691	etaa1.S			qrich1.1.S	pot1.L	LOC108695565
tmem64.S	irf1.L	apitd1.L		ddx47.L	irf1.L			tmem64.S	MGC79091	apitd1.L
rnf146.S	kiaa0232.L	trerf1.L		ppia.L	kiaa0232.L			rnf146.S	arid4b.S	trerf1.L
mgc69520.S	rassf7.L	habp4.L		ahcy.L	rassf7.L			mgc69520.S	mgat1.L	habp4.L
slc35e2b.L	nxpe3l.6.L	syne2.2.S		u2af2.S	nxpe3l.6.L			slc35e2b.L	gga1.L	syne2.2.S
rapgef2.S	march8.L	sos1.L		rpl18.S	march8.L			rapgef2.S	sh2b2.L	sos1.L
tgds.S	LOC108704510	nde1.L		pdcd6ip.L	LOC108704510			tgds.S	scap.L	nde1.L
iqgap3.L	cldn4.L	arhgap35.L		aplp2.S	cldn4.L			iqgap3.L	commd9	arhgap35.L
slc4a11.L	Xelaev18022168m	dock4.L		fam168a.L	Xelaev18022168m			slc4a11.L	kiaa0100.L	dock4.L
otud3.L	muc5b	gtf2ird2b		smarcd2.L	muc5b			otud3.L	not.L	gtf2ird2b
txndc11.L	creb1.S	inf2.S		ndrg2.L	creb1.S			txndc11.L	dclre1b.L	inf2.S
MGC85210	znf703.S	zic2.S		dpp3.S	znf703.S			MGC85210	abhd15.L	zic2.S
znf282.L	lin28a.S	ccnb2.S		snrpb.L	lin28a.S			znf282.L	sept8.S	ccnb2.S
larp6-like.1.L	krasl.S	vcpip1.L		psma7.L	krasl.S			larp6-like.1.L	tsen34.L	vcpip1.L
spire2.L	fbp1.L	snx13.L		med6.L	fbp1.L			spire2.L	ei24.L	snx13.L
otud7b.S	actg1.L	pex12.S		smarce1.L	actg1.L			otud7b.S	rfx7	pex12.S
rbm24.S	rfng.L	fez2.S		serf2	rfng.L			rbm24.S	LOC108716797	fez2.S
arhgap33.S	cdpf1.L	ddx1.L		rpl18.L	cdpf1.L			arhgap33.S	lats1.S	ddx1.L
ube2w.S	tmpo	tbc1d14.L		eif3m.S	tmpo			ube2w.S	id2.S	tbc1d14.L
LOC108699305	trpv6	ubap1.L		hnrnpab.S	trpv6			LOC108699305	clcn3.L	ubap1.L
ect2.S	plekhn1.L	tmem259.L		uba1.S	plekhn1.L			ect2.S	asphd2.L	tmem259.L
mpi.S	sox2.L	blm.L		sqstm1.L	sox2.L			mpi.S	ccnb2.L	blm.L
b3gnt5.L	efna3.L	otud4.L		u2af1.L	efna3.L			b3gnt5.L	mapkbp1.S	otud4.L
mfn2.L	znrd1.L	znf554.L		smarcc1.L	znrd1.L			mfn2.L	ints14.S	znf554.L
tor1aip1-like.L	cdknx.L	rb1cc1.L		spint2.S	cdknx.L			tor1aip1-like.L	xplcg1a	rb1cc1.L
satb1.S	midn.L	fam73a.L		psmd13.S	midn.L			satb1.S	golph3l.S	fam73a.L
wdr60.S	smox.L	tcf20.S		ddx21.S	smox.L			wdr60.S	mis18a.L	tcf20.S
papd4.L	tsc1.S	kdf1.S		rbbp7.L	tsc1.S			papd4.L	dnajc13.S	kdf1.S
ccdc53.L	LOC108709393	jade2.L		snrpd2.L	LOC108709393			ccdc53.L	ndel1.S	jade2.L
mrpl28.L	slc25a28	arf6.L		pbrm1.L	slc25a28			mrpl28.L	fam110c.L	arf6.L
rlf.S	socs1.S	stk35.S		h3-5.L	socs1.S			rlf.S	fhdc1.L	stk35.S
LOC108714398	lhx5.L	leprotl1.S		bcas2.L	lhx5.L			LOC108714398	tnfaip8l3.S	leprotl1.S
sft2d3.S	efcab1.S	golga1.L		sf3a1.L	efcab1.S			sft2d3.S	ppp1cc.L	golga1.L
marchf2	1700037h04rik	dlc1		wdr74.L	1700037h04rik			marchf2	kiaa1191.L	dlc1
sphk1.L	kif11.L	mid1.S		rnf10.S	kif11.L			sphk1.L	josd1.L	mid1.S
erf.S	net1.S	smg8.S		gar1.S	net1.S			erf.S	baz1a.L	smg8.S
jmy.S	pcdh20.L	wdr59.L		nat10.L	pcdh20.L			jmy.S	Xelaev18042674m	wdr59.L
fam3a.S	cldn4.S	tmem51.L		mta2.L	cldn4.S			fam3a.S	znf484.L	tmem51.L
LOC108704531	hist1h3g.L	vps13d.L		dnaja2.L	hist1h3g.L			LOC108704531	tanc2	vps13d.L
kiaa1456.L	spag9.S	mad2l1bp-like.L		ncoa5.S	spag9.S			kiaa1456.L	nkd1.S	mad2l1bp-like.L
Xelaev18032680m	cramp1.L	got2.L		znf638.L	cramp1.L			Xelaev18032680m	pcyox1l.L	got2.L
tmem185a.S	nuak2.L	sipa1l3.L		rpia.L	nuak2.L			tmem185a.S	sbf2.L	sipa1l3.L
bves.L	upk1b	rasa2.L		eif3g.L	upk1b			bves.L	LOC100490741.L	rasa2.L
sept9.S	vgll4.S	Xelaev18033527m		eif2s3.S	vgll4.S			sept9.S	nfatc3.L	Xelaev18033527m
LOC108704241	slc16a12.S	rnf219.L		znf605.S	slc16a12.S			LOC108704241	nek8.S	rnf219.L
irs1.S	cox18.L	pik3ca.S		hnrnpul2.L	cox18.L			irs1.S	zfyve9.L	pik3ca.S
nol4l.S	bace2.L	rnf44.L		las1l.L	bace2.L			nol4l.S	bambi.S	rnf44.L
minpp1.L	eef1a1.L	fam102b.L		carm1.L	eef1a1.L			minpp1.L	dcaf12.L	fam102b.L
hs6st1.L	rnd1.L	mfsd14a.S		snrpc.S	rnd1.L			hs6st1.L	bach1.L	mfsd14a.S
irf6.2.L	auts2	cdc25a.L		dcaf7.S	auts2			irf6.2.L	LOC108719494	cdc25a.L
daglb.L	ncstn.L	sik2.S		mfap1.L	ncstn.L			daglb.L	sun1.L	sik2.S
def8.L	ppp1r10.S	ttc31.L		rnps1.S	ppp1r10.S			def8.L	hlcs.L	ttc31.L
pias1.S	plekhg1.L	tpst2.S		f11r.L	plekhg1.L			pias1.S	tgfbrap1.L	tpst2.S
mtbp.S	dynll1.S	trim8		LOC108709949	dynll1.S			mtbp.S	tmem243.L	trim8
papd5.S	LOC108703754	rhof.S		eif3d.S	LOC108703754			papd5.S	ankrd54.L	rhof.S
mapk1.L	foxo4.L	dhx35.S		fxr1.S	foxo4.L			mapk1.L	mtmr10.L	dhx35.S
usp31.S	rnf38.S	akap13.L		ddx46.L	rnf38.S			usp31.S	mtus1.L	akap13.L
rnf169.S	actg1.S	ercc6l2.L		ddx39a.S	actg1.S			rnf169.S	rai1.L	ercc6l2.L
fastkd1.L	m6pr.L	plxna3.S		rnf10.L	m6pr.L			fastkd1.L	zc3h12b.L	plxna3.S
fam177a1.L	rnf135.L	b3gnt5.S		sec23b.S	rnf135.L			fam177a1.L	nadk.S	b3gnt5.S
cep85l	gmeb1.L	slc8b1.L		znf207.S	gmeb1.L			cep85l	dusp19.L	slc8b1.L
zbed6	ubap2.S	def8.S		eif3i.L	ubap2.S			zbed6	cmip.S	def8.S
plch2	ddias	pms2.L		ewsr1.L	ddias			plch2	fgfr1.S	pms2.L
hhipl1.L	cldn6.1.S	rad17.L		gtf2f1.L	cldn6.1.S			hhipl1.L	fam110a.S	rad17.L
ntmt1.S	top2b.L	patl2.L		thrap3.L	top2b.L			ntmt1.S	zbtb47.S	patl2.L
snx7.S	rpl8.L	uspl1.S			rpl8.L			snx7.S	ksr1.L	uspl1.S
ncor2.S	fam46a.S	fam109a.L			fam46a.S			ncor2.S	egr1.S	fam109a.L
coq10a.S	atp1b1.S	mfap3l.L			atp1b1.S			coq10a.S	ube2z.L	mfap3l.L
slc41a1	arhgap29.S	usp46.L			arhgap29.S			slc41a1	slc9a1.S	usp46.L
oat.1.S	rbm5.S	ptpn23.L			rbm5.S			oat.1.S	cse1l.L	ptpn23.L
kdm7a.S	rbm34.L	pacs2.L			rbm34.L			kdm7a.S	btbd3.L	pacs2.L
figla.L	ccnf.S	tubgcp3.L			ccnf.S			figla.L	stard13.S	tubgcp3.L
ube2f	Xelaev18003796m	ttc8.L			Xelaev18003796m			ube2f	keap1.L	ttc8.L
trabd.L	rbmx.S	e2f4.L			rbmx.S			trabd.L	lnx2	e2f4.L
hn1.S	btbd7.L	dnajb14.S			btbd7.L			hn1.S	cry4.L	dnajb14.S
adamts6.S	polm.S	plpp6.L			polm.S			adamts6.S	sos1.S	plpp6.L
c5orf51.L	ip6k2.S	dcun1d3.S			ip6k2.S			c5orf51.L	aldh2.L	dcun1d3.S
cdc42se2-like.2.L	ubb.S	dlg3.S			ubb.S			cdc42se2-like.2.L	zpd.L	dlg3.S
atxn7l1.S	cep170b.L	tle4.S			cep170b.L			atxn7l1.S	klhl32.L	tle4.S
ppp1r3b.L	leng8.S	dgkh-like.S			leng8.S			ppp1r3b.L	slc41a1.S	dgkh-like.S
ccdc107	zfand4.L	mapkapk2.L			zfand4.L			ccdc107	atp9b.L	mapkapk2.L
Xelaev18010890m	slx4.L	zic2.L			slx4.L			Xelaev18010890m	mos.L	zic2.L
LOC108696623	mettl17.L	nfkbil1.L			mettl17.L			LOC108696623	rp2.S	nfkbil1.L
rims2	lhx5.S	dsc3.S			lhx5.S			rims2	LOC108717147	dsc3.S
kiaa2026.L	rbm5.L	exoc8.S			rbm5.L			kiaa2026.L	zdhhc7.S	exoc8.S
vezt.L	ankrd50.L	slc39a1l.L			ankrd50.L			vezt.L	not.S	slc39a1l.L
csgalnact1.L	ptp4a2.L	c1galt1.S			ptp4a2.L			csgalnact1.L	picalm.1.L	c1galt1.S
sprtn.S	ddit4.S	pag1.S			ddit4.S			sprtn.S	Xelaev18008577m	pag1.S
ssh1.L	atf4.L	top1mt-like.L			atf4.L			ssh1.L	disp1.S	top1mt-like.L
adamts6	znf740.L	abl2.L			znf740.L			adamts6	sec24b.S	abl2.L
zbtb3.S	sox11.L	cdk5r2.S			sox11.L			zbtb3.S	ppp4r1l.L	cdk5r2.S
entpd6.L	kif11.S	katnbl1.L			kif11.S			entpd6.L	Xelaev18011044m	katnbl1.L
cyp2r1.L	sgk223.L	nab1.S			sgk223.L			cyp2r1.L	per2.L	nab1.S
gmnn.L	atp6ap2.L	prpsap2.L			atp6ap2.L			gmnn.L	zyg11b.L	prpsap2.L
septin9.L	irs4.S	slf2.L			irs4.S			septin9.L	fgd6.S	slf2.L
eda.L	ptgs2.L	taf4b.S			ptgs2.L			eda.L	trpm7.S	taf4b.S
map4.L	pim1.L	xpo4.S			pim1.L			map4.L	LOC108712538	xpo4.S
pcnxl4.L	fkbp1a.L	sema4d			fkbp1a.L			pcnxl4.L	MGC76328.S	sema4d
tnfsf11.L	grx5	camsap2			grx5			tnfsf11.L	neu1.L	camsap2
pkn3.L	susd6.L	sertad2.S			susd6.L			pkn3.L	ston2.S	sertad2.S
elk4.S	sf3b5.S	arhgap18.L			sf3b5.S			elk4.S	klf4.L	arhgap18.L
trappc4.S	rpsa.L	trim8.L			rpsa.L			trappc4.S	atg9a.L	trim8.L
slf1.L	slc25a28.S	mast4			slc25a28.S			slf1.L	arid5b.L	mast4
dnajc9.L	hmgn3.S	cdc37l1.S			hmgn3.S			dnajc9.L	slc35a5.L	cdc37l1.S
ndst2.S	ptgs2.S	mb21d2.S			ptgs2.S			ndst2.S	snx13.S	mb21d2.S
iffo1.L	rpl23.S	LOC108711716			rpl23.S			iffo1.L	ralgps2.S	LOC108711716
vegfa.L	trim36.S	kpnb1.L			trim36.S			vegfa.L	LOC108705257	kpnb1.L
cdkn2d.L	rabgap1l.S	hip1r.S			rabgap1l.S			cdkn2d.L	fzd6.L	hip1r.S
wdr20.L	znf653.L	aktip.L			znf653.L			wdr20.L	slc18a2.L	aktip.L
satb1.L	znf10	usp34.S			znf10			satb1.L	slc39a14.S	usp34.S
snrk.S	fbxo5.L	glce.S			fbxo5.L			snrk.S	id3.S	glce.S
fam89a.L	LOC108698063	mllt1.L			LOC108698063			fam89a.L	tmem60.L	mllt1.L
nipa2.S	zbtb2.S	ranbp2.L			zbtb2.S			nipa2.S	tmem251.L	ranbp2.L
lpcat1.S	top2a.L	prmt5.L			top2a.L			lpcat1.S	arv1.L	prmt5.L
mex3d.L	gng7.L	fer.L			gng7.L			mex3d.L	larp6-like.1.S	fer.L
golga5.S	epha4.L	ccdc71l.L			epha4.L			golga5.S	popdc3.S	ccdc71l.L
map2k4.S	rnd1.S	bbs2.S			rnd1.S			map2k4.S	tomm40l.L	bbs2.S
tanc2.L	pvrl2.L	slc35f5.L			pvrl2.L			tanc2.L	tmem55a.L	slc35f5.L
letm2.S	rfx2.L	cdc37l1.L			rfx2.L			letm2.S	lhfp.L	cdc37l1.L
dand5.S	dnajb1.L	pak4			dnajb1.L			dand5.S	rpap1.S	pak4
plch1	hnrnpa1.S	bicc1.S			hnrnpa1.S			plch1	josd1.S	bicc1.S
tbk1.S	slc27a3.L	gemin5			slc27a3.L			tbk1.S	tfeb.S	gemin5
gramd2b.S	nfrkb.L	arhgef12.L			nfrkb.L			gramd2b.S	LOC108719063	arhgef12.L
fam219b.L	epcam.L	socs5.S			epcam.L			fam219b.L	frmd4b.L	socs5.S
dnmt1.L	prmt1.S	arhgef18.S			prmt1.S			dnmt1.L	gse1.S	arhgef18.S
cdkl5.L	tgif2.S	slc39a14.L			tgif2.S			cdkl5.L	mtus1.S	slc39a14.L
plcl2.S	cdk2.S	ralgapb.L			cdk2.S			plcl2.S	LOC108706483	ralgapb.L
rcan3.L	eif4a1.L	dlc1.S			eif4a1.L			rcan3.L	mylip.L	dlc1.S
evc2.L	rps3.L	fdxacb1.L			rps3.L			evc2.L	grip2.L	fdxacb1.L
tmem143.S	MGC52578	ip6k1.L			MGC52578			tmem143.S	mkl2.L	ip6k1.L
cdadc1.S	blzf1.L	mast4.S			blzf1.L			cdadc1.S	msantd3.L	mast4.S
bcl11b.S	upk3a.L	acap3.L			upk3a.L			bcl11b.S	sstr2.L	acap3.L
pacs2.S	mknk2.L	garem1.L			mknk2.L			pacs2.S	gpr75.L	garem1.L
ell.S	hnrnpdl.L	fam53a.S			hnrnpdl.L			ell.S	Xelaev18031872m	fam53a.S
ptprh.S	loc100049121.L	LOC108719634			loc100049121.L			ptprh.S	sod2.S	LOC108719634
plag1.S	prickle1.L	ccdc171			prickle1.L			plag1.S	lurap1.S	ccdc171
ccdc191.L	upk1b.S	mast2.S			upk1b.S			ccdc191.L	tnrc6c.L	mast2.S
LOC108718309	epcam.S	plin2.S			epcam.S			LOC108718309	arhgap20.S	plin2.S
loc100491633.L	arid4a.L	atf7.S			arid4a.L			loc100491633.L	Xelaev18029977m	atf7.S
MGC84185	upf1.L	cdc42ep2.L			upf1.L			MGC84185	fzd3.L	cdc42ep2.L
pdzd2.L	tuba4b.S	usp8.L			tuba4b.S			pdzd2.L	clcc1	usp8.L
coq6.L	nuak2.S	irf2.S			nuak2.S			coq6.L	foxi4.2.L	irf2.S
piezo1.S	igf2bp3.S	rfx7.L			igf2bp3.S			piezo1.S	mix1.L	rfx7.L
bbs9.L	MGC115598	ncoa6.S			MGC115598			bbs9.L	asphd2.S	ncoa6.S
Xelaev18025328m	myl12b.S	thumpd2.L			myl12b.S			Xelaev18025328m	serinc2.L	thumpd2.L
rab12.S	tfg.S	lrp12.S			tfg.S			rab12.S	daglb.S	lrp12.S
vmac.L	prmt1.L	c10orf2.L			prmt1.L			vmac.L	plpp6.S	c10orf2.L
dok1.L	myef2.L	gpr22l.S			myef2.L			dok1.L	march2.S	gpr22l.S
prex2	LOC108702848	atg4a.S			LOC108702848			prex2	fam110b.S	atg4a.S
usp15.L	hnrnph3.L	syap1.S			hnrnph3.L			usp15.L	mgat3.L	syap1.S
emilin2.L	aqp11.L	slc4a1.L			aqp11.L			emilin2.L	ventx2.1.S	slc4a1.L
zar1l.L	hnrnpa1	ung.L			hnrnpa1			zar1l.L	LOC108697345	ung.L
alg1.L	tbcd.L	bri3.S			tbcd.L			alg1.L	ventx2.2.L	bri3.S
LOC108719532	LOC108698339	pik3cb.S			LOC108698339			LOC108719532	klf2.L	pik3cb.S
arhgap11a.2.S	eif3f.S	tmtc2.S			eif3f.S			arhgap11a.2.S	bix1.1.L	tmtc2.S
rpain.S	smarce1.S	ankrd52.S			smarce1.S			rpain.S	sik2.L	ankrd52.S
ppargc1a.L	hnrnpdl.S	filip1.L			hnrnpdl.S			ppargc1a.L	muc5acl.L	filip1.L
vsig10.L	hsbp1.L	pbx3			hsbp1.L			vsig10.L	Xetrov90009976m.L	pbx3
zbtb37.L	pabpc1.S	uspl1-like.L			pabpc1.S			zbtb37.L	arid5b-like.1.S	uspl1-like.L
tdgf1.1.L	mknk2.S	dnajb14.L			mknk2.S			tdgf1.1.L	fam134b.S	dnajb14.L
ell.L	ddx51.L	tbc1d4.S			ddx51.L			ell.L	slc35a1.L	tbc1d4.S
spry1.S	h2afz.L	ino80d.S			h2afz.L			spry1.S	ventx1.2.L	ino80d.S
LOC108707252	xnf7.S	ammecr1l.L			xnf7.S			LOC108707252	bix1.3.S	ammecr1l.L
LOC108709196	npm1.L	aak1			npm1.L			LOC108709196	btg5.1.S	aak1
rnf103.L	krt8.L	kcnj5.L			krt8.L			rnf103.L	ventx2.1.L	kcnj5.L
tlcd2.S	ppp1ca.L	pex12.L			ppp1ca.L			tlcd2.S		pex12.L
kank1.L	cpsf3.L	bcar3.S			cpsf3.L			kank1.L		bcar3.S
Xelaev18013924m	ilf2.S	slc35e3.S			ilf2.S			Xelaev18013924m		slc35e3.S
baz1a.S	c19orf24.L	kazn.L			c19orf24.L			baz1a.S		kazn.L
nfkb2.L	nucks1.S	arhgef12.S			nucks1.S			nfkb2.L		arhgef12.S
leprot.L	khdrbs1.L	usp8.S			khdrbs1.L			leprot.L		usp8.S
acap3.S	snrpd3.L	rnf112.1.S			snrpd3.L			acap3.S		rnf112.1.S
Xelaev18009472m	pitrm1.L	trak1			pitrm1.L			Xelaev18009472m		trak1
irf2.L	rhoa.L	mkl1.S			rhoa.L			irf2.L		mkl1.S
mtmr8	hnrnpk.L	dact3.S			hnrnpk.L			mtmr8		dact3.S
wdr20.S	acadl.L	LOC108709443						wdr20.S		LOC108709443
adcy6.S	dnajc10.L	akap10.L						adcy6.S		akap10.L
smtn.S	natd1.L	dsel.L						smtn.S		dsel.L
atat1.S	aspm	b9d2.L						atat1.S		b9d2.L
tmem171.L	kiaa0513.L	muc3a						tmem171.L		muc3a
etv3l.S	esco1.L	gtpbp6.S						etv3l.S		gtpbp6.S
klf12.L	ptges2.L	etaa1.L						klf12.L		etaa1.L
gemin5.L	dgcr2.S	fam46b.S						gemin5.L		fam46b.S
mtfmt.L	ctdsp1	cct4.L						mtfmt.L		cct4.L
rnf185.S	tspan14.L	stxbp6.L						rnf185.S		stxbp6.L
diablo.L	bod1l1	cse1l.S						diablo.L		cse1l.S
dock4	smarca5	tbc1d9						dock4		tbc1d9
rsbn1l.L	gdf9.L	ankrd37.S						rsbn1l.L		ankrd37.S
casd1.L	cbfb.S	pigc.S						casd1.L		pigc.S
rab4b.S	tbc1d4.L	acox2.L						rab4b.S		acox2.L
adamtsl1	sat1.L	lbh.L						adamtsl1		lbh.L
rpa2.S	slc25a44.L	ets1.S						rpa2.S		ets1.S
ikzf4.S	gpn3.L	kdm5b.S						ikzf4.S		kdm5b.S
rpa1.L	irak1.L	usp15.S						rpa1.L		usp15.S
bcl6.L	rbfox2.S	usp44.S						bcl6.L		usp44.S
lgr4.L	ripor1.L	znf335.L						lgr4.L		znf335.L
klf12.S	lcor.L	peak1.L						klf12.S		peak1.L
LOC108703747	depdc1-b	arhgef7.L						LOC108703747		arhgef7.L
gpr75.S	tle1.L	ippk.S						gpr75.S		ippk.S
zbtb6.S	taok3.L	arhgap35.S						zbtb6.S		arhgap35.S
tlcd2.L	snap23.L	zfpm1.S						tlcd2.L		zfpm1.S
LOC108704278	actn4.S	LOC100127794.L						LOC108704278		LOC100127794.L
arhgap42.S	smarca5.S	polr3g.L						arhgap42.S		polr3g.L
dscr3.L	LOC108701074	prmt5.S						dscr3.L		prmt5.S
trps1.L	ctdsp2.L	gm29884						trps1.L		gm29884
stc1.L	ppp1r9a.S	fhdc1						stc1.L		fhdc1
ccnb1.S	wdr41.L	map7d3.L						ccnb1.S		map7d3.L
LOC108718785	amer1	c11orf96.S						LOC108718785		c11orf96.S
tmem64.L	zfp36l1	haus8.L						tmem64.L		haus8.L
simc1.L	osbpl8.L	rab5d.L						simc1.L		rab5d.L
fosb.S	kdm4a.S	st3gal2.1.L						fosb.S		st3gal2.1.L
fam57b.S	csnk1d.L	dap.L						fam57b.S		dap.L
ppm1h.L	gpi.L	trafd1.L						ppm1h.L		trafd1.L
lpar6.S	tmem131.L	smtn.L						lpar6.S		smtn.L
zbtb39.S	lin9.L	smad2.S						zbtb39.S		smad2.S
c8orf88	kdm3b.L	plpp5.L						c8orf88		plpp5.L
tvp23a.S	kiaa1671	tbc1d2b.S						tvp23a.S		tbc1d2b.S
fbxo43.L	b3gnt4.L	acaca-like.S						fbxo43.L		acaca-like.S
bmp2.S	zhx3.S	zfyve9.S						bmp2.S		zfyve9.S
slc25a37.S	tram2.L	mink1						slc25a37.S		mink1
loc733728.L	eml4.L	znf282.S						loc733728.L		znf282.S
ptpn3.S	slbp.L	tmem184a.S						ptpn3.S		tmem184a.S
tmem117.S	znf131.L	garem1.S						tmem117.S		garem1.S
hlf.S	ube3c.L	grinl1a.L						hlf.S		grinl1a.L
loc100158305.L	letmd1.L	lamp2.L						loc100158305.L		lamp2.L
nhlrc3.S	stim2.S	rnf19b.L						nhlrc3.S		rnf19b.L
foxd4l1.1.S	arfgap1.S	fbxo30.S						foxd4l1.1.S		fbxo30.S
zfp36l2.2.L	kiaa0513.S	hs6st3						zfp36l2.2.L		hs6st3
siah2.L	herc3.L	MGC83539						siah2.L		MGC83539
fdft1.S	rev3l.L	rsbn1.L						fdft1.S		rsbn1.L
tshz3.S	mtmr1.L	cnp.L						tshz3.S		cnp.L
LOC108699404	kif22.L	tnrc6c.S						LOC108699404		tnrc6c.S
pnhd.S	slc9a7.S	tmem170a.S						pnhd.S		tmem170a.S
uhrf2.L	tnfaip1.L	znf577.S						uhrf2.L		znf577.S
txnl4b.S	tmem184c.L	socs6.L						txnl4b.S		socs6.L
apex2.L	rraga.S	lpar5.S						apex2.L		lpar5.S
ssx2ip.S	trip11.L	cmtm7.S						ssx2ip.S		cmtm7.S
adrb3.L	zdhhc14	stmn1.S						adrb3.L		stmn1.S
rdh13.L	ralgapa1.S	scai						rdh13.L		scai
cbx4.S	rab21.L	tesk2.S						cbx4.S		tesk2.S
prr14l.L	zbtb33.S	cracr2b.S						prr14l.L		cracr2b.S
ccna1.S	naa15.S	ccdc125.S						ccna1.S		ccdc125.S
zfp36l2.1.S	limch1.L	ring1.S						zfp36l2.1.S		ring1.S
abo.2.L	rassf3.L	arhgap20						abo.2.L		arhgap20
leprot.S	abcd1.L	bfar.L						leprot.S		bfar.L
znrf1.L	atmin.L	rgs12.L						znrf1.L		rgs12.L
admp.L	phlpp1.L	klhdc10.L						admp.L		klhdc10.L
admp.S	ubtd1.S	fam53c.S						admp.S		fam53c.S
foxd4l1.1.L	slc12a6.S	tor1a.S						foxd4l1.1.L		tor1a.S
gata2.L	insrr.L	idh3a.L								idh3a.L
dlc.L	nlk.L	kank1.S								kank1.S
szl.L	rfwd2.L	kctd9.L								kctd9.L
msx1.S	ralgps2.L	gtf3c2.L								gtf3c2.L
dbn1	ankrd28	eif2ak3.S								eif2ak3.S
szl	picalm.1.S	rnf149.L								rnf149.L
igfbp2	cox5b.2.L	hells.L								hells.L
zc3h12c.S	znf646.S	disp1.L								disp1.L
dll1.L	ndc1.S	tmem57.L								tmem57.L
pax3.L	rapgef1.S	fam104a.S								fam104a.S
dlx5.L	aff1.L	ext1.L								ext1.L
fucolectin.S	stx2.L	gsap.L								gsap.L
foxi4.1.S	trim33.S	zcchc14.S								zcchc14.S
figf.L	mgat4a.L	chmp1a								chmp1a
egfl6.L	clp1.L	mitd1.L								mitd1.L
nuak1.L	fam20b.L	med13l.S								med13l.S
ventx1.1.L	tmem110.S	foxh1.S								foxh1.S
kremen2.L	armt1.L	kiaa1958								kiaa1958
rgs2.L	man1b1.L	ago1.S								ago1.S
slc30a8.L	ppp1r15b.L	ralgps1.S								ralgps1.S
nptx2.S	cdon.S	cnksr2.L								cnksr2.L
LOC108716735	cops8.L	fbxo33.L								fbxo33.L
axl.S	cachd1.S	slc30a5.S								slc30a5.S
dll1.S	map4k4-like.L	ptpn21.S								ptpn21.S
arhgap6	mcm3ap.L	ddhd1.L								ddhd1.L
msx2.L	poldip2.S	plxnb3								plxnb3
fam212a.S	wwp1.S	aak1.S								aak1.S
foxi1.L	prkcsh.L	pias4.S								pias4.S
gata3.L	cog3.L	ei24.S								ei24.S
bambi.L	eea1.S	ndst2.L								ndst2.L
MGC52622	samd4a.L	myo1e.1.L								myo1e.1.L
tph1.S	rnf217.L	prkch.L								prkch.L
adcy4.S	hmgxb3.L	efna5.L								efna5.L
tll1.S	inpp5f.L	vldlr.S								vldlr.S
ptger4.S	tubg1.S	zfyve1								zfyve1
gprc5b.L	pik3r2.L	slc30a7.S								slc30a7.S
myo5b.L	fasn.L	srprb.L								srprb.L
ptk2b.S	mpp6.L	chmp1a.S								chmp1a.S
chst1.S	asap2.L	ncoa7.L								ncoa7.L
ventx3.2.L	mfsd14b	adh5.L								adh5.L
fam167a.L	nsd1.S	LOC108695571								LOC108695571
fam167a.S	nck1.S	hs3st1								hs3st1
shroom3.L	hectd4.L	rab5d.S								rab5d.S
id4.S	ryk.S	arhgap11a.2.L								arhgap11a.2.L
pde7b	nckipsd.S	tubg1.L								tubg1.L
ccn1l.S	gtpbp1.S	lrmp.L								lrmp.L
sox18.S	gid8.L	fam53a.L								fam53a.L
smad7.S	znf143.L	gpr63.L								gpr63.L
fam212a.L	ube2k.L	itga5.S								itga5.S
vcan.L	lama5	tbp.S								tbp.S
hesx1.L	psat1.L	klhl17.L								klhl17.L
pdlim4.L	usp6nl.L	pex11a.L								pex11a.L
p2ry2.S	blcap.S	spopl.S								spopl.S
myt1.L	mcrip1.S	dync1li2.L								dync1li2.L
LOC108704672	extl3.L	fam13a.S								fam13a.S
ventx1.1.S	acvr1.L	tanc1-like.L								tanc1-like.L
pygm.S	LOC108704685	rassf3.S								rassf3.S
tmprss9.L	znf618.S	rab11fip1.S								rab11fip1.S
sema6a.L	pik3c2a.S	LOC108708627								LOC108708627
gm39120	ubr3.L	casp9.S								casp9.S
Xelaev18027269m	rilp.S	loc100493164.L								loc100493164.L
arhgef19.L	atp13a1.L	wdr6.L								wdr6.L
Xelaev18000128m	atg13.S	ppargc1b.L								ppargc1b.L
lmo4.2.S	dact1.L	dnajb9.S								dnajb9.S
meis2.S	pid1.L	rab4b.L								rab4b.L
rreb1.L	rnf19a.S	nr3c2.S								nr3c2.S
aifm3-like.L	loc733726.L	arhgef17.L								arhgef17.L
LOC108698800	MGC83970	tpst2.L								tpst2.L
pcdh18.L	usp9x.S	loc100145507.S								loc100145507.S
slc9a3r2.L	LOC108719553	lpcat2.S								lpcat2.S
sox18.L	birc6.S	LOC108714686								LOC108714686
pkp3.S	gtf2ird1.S	r3hdm4.L								r3hdm4.L
arhgap33.L	rexo1.L	zar1l.S								zar1l.S
insm1.S	eml1	nr3c2.L								nr3c2.L
lrrn1.S	ptpn13.L	tmem57.S								tmem57.S
gfpt1.L	atrn.L	Xelaev18030392m								Xelaev18030392m
rab11fip4	csgalnact2.L	pik3cb.L								pik3cb.L
tll1-like.1.L	fignl1.L	slc8b1.S								slc8b1.S
sox8.L	hectd4.S	pak7.L								pak7.L
slc7a11	tnpo1.L	zfpm1								zfpm1
atp12a	ppp1r15b-like.S	abhd13.S								abhd13.S
mdk.S	timm50.L	tmem181.L								tmem181.L
Xelaev18012294m	habp4.S	mllt6.S								mllt6.S
MGC76328.L	gpr155.L	dock9								dock9
lgals3.S	vps53.S	rsbn1l.S								rsbn1l.S
hnrnpr.L	usp49.S	dgkh								dgkh
slc7a8.S	ubl3	tpgs1.L								tpgs1.L
rgmb.S	sh3bp5.L	rif1.S								rif1.S
pcdh19	dennd4c.S	adcy6.L								adcy6.L
map3k1.S	oxct1.L	jade1.S								jade1.S
tbkbp1.S	mzt2b	aco2.S								aco2.S
foxi4.2.S	atp10d.L	rin3.L								rin3.L
dnmbp.L	adam10.S	h2afj.S								h2afj.S
dlx2.S	ccpg1.S	sun1.S								sun1.S
nav2.L	rad54l	nhsl1								nhsl1
atp1a3.L	csk.L	atf6b.L								atf6b.L
creb3l4.S	c16orf46	klhl13.L								klhl13.L
tbc1d24.2.S	aen.L	ccnb1.L								ccnb1.L
lfng.L	gnpat.S	socs6.S								socs6.S
was.L	grhl1.S	slc25a37.L								slc25a37.L
map3k13.L	mia3-like.1.L	aldh18a1.L								aldh18a1.L
runx1	nos1ap	optn.L								optn.L
Xelaev18003957m	gid4.S	cables1.L								cables1.L
notch1.L	loc733735.L	aco2.L								aco2.L
ifnlr1	zar2.L	plekha3.L								plekha3.L
smad7.L	slc29a3.S	rassf10.S								rassf10.S
zswim4.S	lcor.S	map4.S								map4.S
itga6.L	dbf4b.L	kctd3.L								kctd3.L
fam193a.L	unnamed.S	plxnb3.S								plxnb3.S
ventx1.2.S	ssh2	mpp5.S								mpp5.S
Xelaev18017221m	dcun1d5.S	arhgap20.L								arhgap20.L
hdac11	naa25.S	dync1li2.S								dync1li2.S
LOC108706094	rock1.S	akap11.L								akap11.L
grhl3.L	nr1i2.S	pxylp1.L								pxylp1.L
LOC108715136	strada.L	lrriq1.L								lrriq1.L
pcbp2.S	hs2st1.S	pif1.L								pif1.L
fabp3.S	glce.L	e2f1.S								e2f1.S
rreb1.S	twsg1.L	rnf149.S								rnf149.S
id2.L	nlk.S	ppp1r3b.S								ppp1r3b.S
Xelaev18034047m	ninl.L	tanc1-like.S								tanc1-like.S
ccnd1.L	mpst	otud4.S								otud4.S
scube2.L	phlpp1.S	MGC131307								MGC131307
hdac7.L	kdf1.L	styx.L								styx.L
txnip.S	dctn4.L	haus4.L								haus4.L
kcnk5.S	znf516.L	them6.L								them6.L
gfpt1.S	rnf130.S	cyld.L								cyld.L
hes4.L	MGC83705	plbd2.L								plbd2.L
rasd1.S	znf518b.L	fam8a1.L								fam8a1.L
Xelaev18009838m	dag1.L	dand5.L								dand5.L
abca1.L	kbtbd3.S	dnajb9.L								dnajb9.L
mafb.L	dtna.L	znrf1.S								znrf1.S
LOC108706543	tbc1d8b.L	pcnt.L								pcnt.L
abca1.S	itpkc.S	mb21d2.L								mb21d2.L
fgf8.S	dck.1l.L	nlrx1.L								nlrx1.L
arhgap39	trim33.L	helb.L								helb.L
bbip1.S	trit1.L	ssx2ip.L								ssx2ip.L
sptbn5.L	txn2.S	fbxo30.L								fbxo30.L
rhou	bptf.S	ptpn21.L								ptpn21.L
hexim1.S	xzar2	sertad2.L								sertad2.L
kit.L	btbd2.S	tspoap1.L								tspoap1.L
Xelaev18011097m	arhgef11.S	txndc9.L								txndc9.L
gas2l1.L	vangl2.L	vldlr.L								vldlr.L
loc100487575.L	MGC115510	plcl2.L								plcl2.L
nrarp	acvr2b.S	foxi2.L								foxi2.L
ier5l.L	slc25a36.S	tmem19.L								tmem19.L
eif4a2.L	znf821.S	fam63b.L								fam63b.L
pcdh7.L	dnajc13.L	hs3st1.S								hs3st1.S
LOC108715172	cep85l.L	parp15								parp15
hspbp1.L	daam1.S	ccdc69.S								ccdc69.S
cd99l2.S	ppp2r5e.L	mob3c.S								mob3c.S
smad4.1.L	abhd13.L	LOC108718425								LOC108718425
prickle2.L	mef2d.L	tpcn2.L								tpcn2.L
tnip2.S	med4.S	limd2.S								limd2.S
tox3.L	alg12.L	map3k2.L								map3k2.L
esr-5.L	nr2c1.L	btg4.S								btg4.S
hhip.L	fry.L	hprt1.L								hprt1.L
LOC108711841	gcc1.S	cpeb3.S								cpeb3.S
rhou.L	ccdc88a.S	wdr60.L								wdr60.L
rbm12.L	bnip1.S	camsap1.L								camsap1.L
s100a2	trpm7.L	tnfrsf19.S								tnfrsf19.S
LOC108698352	bcl11a.L	ago1.L								ago1.L
post7p.L	atg14.L	kif13a								kif13a
lypd2.L	fkbpl.S	tbp.L								tbp.L
slc2a1.L	nckipsd.L	pou5f3.3.S								pou5f3.3.S
itprip.S	kiaa0355.S	pgam1.L								pgam1.L
timp3.L	rlim.S	LOC108702912								LOC108702912
fdps.L	usp46.S	c1orf116.L								c1orf116.L
efna1.L	tpcn1.L	ikzf2.L								ikzf2.L
klf5.S	kat2b	LOC108717918								LOC108717918
vasn.S	pag1.L	tmem116.L								tmem116.L
e2f7.L	grb10.L	ythdc2.L								ythdc2.L
LOC108698461	Xelaev18024710m	mylip.S								mylip.S
pcdha13.L	tnfaip8.L	amot.L								amot.L
notch1.S	cry1.L	rspry1.L								rspry1.L
lrp10.L	rfwd2.S	cyld.S								cyld.S
phldb3.S	styx.S	znf81.L								znf81.L
vim.L	spast.L	fbxw9.S								fbxw9.S
isg20l2.S	ccdc117	pou5f3.3.L								pou5f3.3.L
Xelaev18006061m	wdr77.S	slc39a9-like.1.S								slc39a9-like.1.S
sbno2.S	zbtb37.S	kctd9.S								kctd9.S
hexim1.L	arhgap32.S	fbxo43.S								fbxo43.S
cdc25b.L	xpo4.L	cpeb1.S								cpeb1.S
march7.S	aip.L	akip1								akip1
stx8.L	LOC108719552	btg3.S								btg3.S
sertad1.S	mtss1.1.S	trim2.L								trim2.L
prom1.L	cachd1.L	foxi2.S								foxi2.S
erbb3.S	elmod3.S	btg5.1.L								btg5.1.L
mlec.L	rps6ka6	kiaa0922.S								kiaa0922.S
loc728026.L	LOC108710061	MGC68639								MGC68639
hist1h2aj.L	ripk4.L	aktip.S								aktip.S
mxi1.S	lrp8.L	mlh1.S								mlh1.S
Xelaev18001619m	fbxo10.L	ccna1.L								ccna1.L
gadd45a.L	cyp27c1.S	rspry1.S								rspry1.S
herpud1.S	pex10.L	egr1.L								egr1.L
unc50.S	asxl3.L	btg4.L								btg4.L
MGC81482	ttbk2.L	LOC108705579								LOC108705579
pou5f3.2.L	uvrag.L	cat.2.L								cat.2.L
abcb5	derl2l.L	tmem131l.L								tmem131l.L
akap2.S	med13l.L	cpeb1.L								cpeb1.L
hspa8.L	rapgef1.L	cdca7								cdca7
znf740.S	pxk.S	card19								card19
btg1.L	grasp.L	ccnb5.L								ccnb5.L
kirrel2.L	chd8.S	gata2.S
gadd45g.L	snx16.L	col4a5.S
phldb3.L	spg11.L	sspo.L
ppp1r8.L	mef2d.S	scnn1a.S
zfhx3.L	pcyox1.L	cfh.L
gfod1.S	vps18.S	dock10.S
hspa8.S	taok3.S	g0s2.L
myl9.L	cep126	ror2.L
rpl26.S	ankib1.S	LOC108715896
csrnp1.L	cep97.L	lrp2.L
dynll1.L	kif6	LOC100496293.L
fgd4.L	abcc6.L	pkdcc.1.L
rps21.S	prickle4.S	capn8.S
ctps1.L	LOC108699992	ventx1.2.L
tra2a.S	lhfpl2.S	runx1.L
sh3bp5l.L	zwilch.S	gli2.S
ago2.L	nfatc3.S	pkdcc.1.S
lamc1.S	LOC108707483	clca3.L
grpel2.L	tspan33.L	sema6a.S
cox7c.S	ap4e1.S	clcnkb
LOC108710532	prex1.S	wfdc2.L
rps9.L	ndrg4.S	c3.L
aim1.S	znf462.L	efnb3.L
rpl26.L	syne2	elavl3
cpne3.L	rhbdf2.L	wasf3
Xetrov90029963m.L	tnpo2.S	Xelaev18022564m
plekhg3.L	palb2.L	itgb8.L
svbp.S	icmt.S	map3k14.S
rps3a.L	arrdc4.L	crb2.L
dyrk3.L	dennd5b.L	slco5a1.S
rps4	slc4a11.S	afap1l2.L
parp1.L	pard6g.S	scnn1a.L
pbx1.L	fam171a1.S	foxi4.1.L
LOC108708564	nf1.S	col8a1.L
pou5f3.2.S	znf577.L	sds.S
ahnak.L	tns3.L	atp1b2
rpl7.L	tcp1.S	elavl3.L
mcl1.L	cmtm4.S	map3k19.L
hmgn2.L	diablo.S	foxi4.2.L
MGC83421	rbm38.L	chrna2.S
ubc.L	ush1g.L	azin2.S
noc4l.S	tnrc6b.S	LOC100487499.S
wdr43.L	gatsl3.L	fblim1.L
LOC108709832	pgat.L	fgd1.S
gm20188	atxn7l3.L	LOC100496797.L
hmg-17	ormdl1.S	myt1.S
dzip1.L	zfyve28.L	scube2.S
tubb.L	tmem104.L	trpm8b.L
rps2	rmnd5a.L	cfb.L
rpl37.S	gse1.L	onecut2.L
rpl31.L	shroom4.L	hsp90aa1.1.L
rpl17.L	fbxl12.L	LOC108699553
awat1.L	n4bp3.S	cdc14a.S
kdm2a.S	gigyf2.S	Xelaev18043700m
rps12.L	asap2.S	trim67.S
mkrn2.L	dolpp1	col4a5.L
rpl7a.S	mocs2	myc.L
faxc.L	slc15a4.L	tmem265.L
tmem111.L	slc23a2.L	ltk
pmel.S	arhgap32.L	Xelaev18013398m
srsf2.S	tmem169.L	kalrn.L
atp1a1.L	lysmd4.S	cyp27a1.L
hp1bp3.L	mark1.S	Xelaev18003060m
MGC81028	LOC108700013	sst.2
rps27a.S	cacul1.S	il16.L
LOC108695506	wtip.S	klf10.S
anxa4.L	patz1.S	LOC108712518
rpl36a.S	foxr1.L	olfm4.L
hnrnpa0.L	itpkc.L	c9.L
srrt.L	fer.S	celsr1
eif5a.L	cog1.S	rflcii.L
gtpbp4.L	ing3.L	cdx2.L
kbtbd7.L	pot1.L	dazl.L
luc7l2	MGC79091	arl8a.S
rps19.S	arid4b.S	sacs
psmd1.S	mgat1.L	slc25a29.L
rpl17.S	gga1.L	xepsin.L
mdk.L	sh2b2.L	LOC108704223
mapre1.S	scap.L	robo3.S
msl1.S	commd9	sulf1.L
mzt1.S	kiaa0100.L	irx2.S
rpl37a.L	not.L	sbno2.L
cwc25.L	dclre1b.L	LOC108706318
arpc5l.L	abhd15.L	proser1.S
rplp2.L	sept8.S	bambi.S
rpl36.S	tsen34.L	fam83c.S
snrnp200.S	ei24.L	stard13.S
hdlbp.L	rfx7	txnip.L
ppp1cb.L	LOC108716797	ccdc68.L
tpt1.L	lats1.S	apeh.L
rpf1.L	id2.S	plcd3.L
loc100494818.L	clcn3.L	sgk1.L
sec61g.L	asphd2.L	ventx2.1.L
rps20.S	ccnb2.L	cyp27a1
rps5.L	mapkbp1.S	ventx2.2.L
loc100135138.S	ints14.S	kcp.L
sptan1.S	xplcg1a	plekhs1
sec61a1.S	golph3l.S	unc93a.L
rps5.S	mis18a.L	alpl.L
otud6b.L	dnajc13.S	guca1a.S
mtmr12.L	ndel1.S	sall3.S
LOC108695696	fhdc1.L	arhgef3.1.S
rps8.S	tnfaip8l3.S	sgk1.S
rpl7a.L	ppp1cc.L	LOC108715348
sumo2.L	kiaa1191.L	znf608.S
rpl15.L	josd1.L	LOC108710705
spint2.L	baz1a.L	evpl.L
rpl10a.S	Xelaev18042674m	LOC100495010.S
anxa7.L	znf484.L	dlx5.S
vapb.L	tanc2	arrdc3.L
prpf8.S	nkd1.S	gprc5cl1.L
cpsf1	pcyox1l.L	dennd2c.L
zcchc9.L	sbf2.L	mst1.L
dhx29.L	LOC100490741.L	socs3-like.1.L
snrpd1.L	nfatc3.L	pdk4.L
gatd3b	nek8.S	tex264.S
hsp90ab1.S	zfyve9.L	spsb3
txnrd3.L	dcaf12.L	slc35d2
ncapg.L	bach1.L	klf10.L
rpl23a.L	LOC108719494	sptbn4
gltscr2.L	sun1.L	rhebl1.L
glul.L	hlcs.L	mxi1.L
supt5h.S	tgfbrap1.L	crocc.L
fkbp1a.S	tmem243.L	pdgfa.L
rpl13a.S	ankrd54.L	prkx.L
hnrnpll	mtmr10.L	stat3.2.L
elob	mtus1.L	fzd2
wbp11.S	rai1.L	cebpd.S
tuba1c.L	zc3h12b.L	dio3.L
smarcc1.S	nadk.S	Xelaev18038622m
eif4g2.L	dusp19.L	kiaa0232.S
eif1b	cmip.S	ltbr
ran.S	fgfr1.S	dhx58.L
naa20.S	fam110a.S	ggt1.L
pmpca.S	zbtb47.S	lin28a.L
dhx9.L	ksr1.L	tubb2b.L
h3f3c.L	egr1.S	LOC108719506
MGC84691	ube2z.L	lsp1.S
ddx47.L	slc9a1.S	galnt7.S
ppia.L	cse1l.L	ervfrd-1
ahcy.L	btbd3.L	LOC108710017
u2af2.S	keap1.L	cfap206.L
rpl18.S	lnx2	kiaa1324.S
pdcd6ip.L	cry4.L	trarg1.L
aplp2.S	sos1.S	ugcg.S
fam168a.L	aldh2.L	sox9.L
smarcd2.L	zpd.L	rbms2.L
ndrg2.L	klhl32.L	tubb4b.L
dpp3.S	slc41a1.S	klf9.L
snrpb.L	atp9b.L	MGC82975
psma7.L	mos.L	zswim5
med6.L	rp2.S	creb3l2.L
smarce1.L	LOC108717147	fth1.S
serf2	zdhhc7.S	ralgds.S
rpl18.L	not.S	mig30.L
eif3m.S	picalm.1.L	gpr143.L
hnrnpab.S	Xelaev18008577m	ras-dva1.L
uba1.S	disp1.S	tuba3c.S
sqstm1.L	sec24b.S	kitlg.L
u2af1.L	ppp4r1l.L	id3.S
smarcc1.L	Xelaev18011044m	LOC108702458
spint2.S	per2.L	fgd1.L
psmd13.S	zyg11b.L	LOC108713945
ddx21.S	fgd6.S	vgll4l.L
rbbp7.L	trpm7.S	alcam.S
snrpd2.L	LOC108712538	slc7a5.S
pbrm1.L	MGC76328.S	itpka
h3-5.L	neu1.L	ranbp3l.L
bcas2.L	ston2.S	LOC100490918.L
sf3a1.L	klf4.L	id3.L
wdr74.L	atg9a.L	msi1.S
rnf10.S	arid5b.L	myo9a
gar1.S	slc35a5.L	LOC108695513
nat10.L	snx13.S	apoc1-like.L
mta2.L	ralgps2.S	mcf2l
dnaja2.L	LOC108705257	mypop.S
ncoa5.S	fzd6.L	cass4.S
znf638.L	slc18a2.L	sp6.L
rpia.L	slc39a14.S	serpinh1.S
eif3g.L	tmem60.L	otud1.L
eif2s3.S	tmem251.L	zswim5.S
znf605.S	arv1.L	znf451
hnrnpul2.L	larp6-like.1.S	prss8
las1l.L	popdc3.S	LOC100127323
carm1.L	tomm40l.L	rap2b.L
snrpc.S	tmem55a.L	ptch1.L
dcaf7.S	lhfp.L	top2b.S
mfap1.L	rpap1.S	fosl2.S
rnps1.S	josd1.S	tsc22d3.L
f11r.L	tfeb.S	tceb3.S
LOC108709949	LOC108719063	cnfn.1.L
eif3d.S	frmd4b.L	arrdc3.S
fxr1.S	gse1.S	arl4a.S
ddx46.L	mtus1.S	lrrc75b
ddx39a.S	LOC108706483	ist1
rnf10.L	mylip.L	ventx2.1.S
sec23b.S	grip2.L	hpgd.L
znf207.S	mkl2.L	fgfr2.L
eif3i.L	msantd3.L	melk.L
ewsr1.L	sstr2.L	acod1
gtf2f1.L	gpr75.L	dedd2.L
thrap3.L	Xelaev18031872m	ptma.L
	sod2.S	MGC82544
	lurap1.S	cxcl10.L
	tnrc6c.L	zmcm3.L
	arhgap20.S	ralb
	Xelaev18029977m	khdc4
	fzd3.L	foxj1.S
	clcc1	LOC108698354
	mix1.L	lrig2.L
	asphd2.S	srsf7.L
	serinc2.L	cdk5r1.L
	daglb.S	plk2.L
	plpp6.S	entpd2.S
	march2.S	loxl1.L
	fam110b.S	atp6a1
	mgat3.L	cfap52.L
	LOC108697345	slc25a34.L
	klf2.L	rbl1.L
	bix1.1.L	alcam.L
	sik2.L	xicl
	muc5acl.L	pabpc4.L
	Xetrov90009976m.L	irg1.L
	arid5b-like.1.S	birc2.S
	fam134b.S	actb.L
	slc35a1.L	efnb2.L
	bix1.3.S	e2f8.L
	btg5.1.S	eef1a1o.S
		prnp.S
		pars2.L
		lsm14b.L
		egln3.L
		slc7a3.L
		mcm6.2.L
		pcf11.S
		brd2.S
		admp2.L
		e2f3.L
		asb7.L
		acod1l.L
		rnf223.L
		herpud1.L
		efnb2.S
		zfand5.L
		efna1.S
		hspg2.L
		tgif2.L
		nradd.L
		arnt.S
		sh3bp4.L
		vwa5a.L
		tfcp2l1.L
		cass4.L
		rbm14.L
		atf4.S
		e2f7.S
		mlec.S
		cables2.L
		ppp1r10.L
		map3k1.L
		prelid1.S
		litaf.L
		timp3.S
		gsk3b.L
		srsf7.S
		tra2a.L
		fth1a
		dido1.L
		znf101
		sppl3.L
		znf592.L
		cltc.L
		LOC108696887
		rps2.L
		socs3-like.1.S
		unknown.S
		fbxl20.S
		fam110c.L
		hist2h2ab.S
		ints6l
		fosl2.L
		cdc34.S
		loc108648340.L
		slc7a5.L
		actb.S
		ptma.S
		vezf1.S
		wee1.S
		cbx5.L
		prdm15.S
		unkl.L
		rabgap1l.L
		gla.S
		ssfa2.L
		capzb.L
		slc2a1.S
		smg1.L
		irx2.L
		pin4.L
		dgat1.L
		ctps1.S
		calr.L
		rap2b.S
		upk1a.L
		ubb.L
		sec14l1.L
		hnrnpl.L
		ilf2.L
		spata13.S
		hist2h3d.L
		LOC108718087
		sbno1.L
		xvent-2b
		u2af1.S
		psmc5.L
		fam32a.L
		krt8.S
		sf3b2.S
		fxyd3
		gldc.S
		ppig.L
		glul.S
		hmgn3.L
		odc1.L
		arf4
		rbm8a.L
		erh.L
		MGC80893

## Sheet: St10.5-11
Temporal DESeq Epi Neur Venn Diagram Gene Lists corresponding with Figure 3B
Total				Increase				Decrease
Epi Only	Neur Only	Overlap		Epi Only	Neur Only	Overlap		Epi Only	Neur Only	Overlap
mlxip.L	Xetrov90022200m.S	vangl2.S		gata4.S	Xetrov90022200m.S	ulk1.S		mlxip.L	cnksr1.L	vangl2.S
itsn1.L	Xetrov90013256m.L	kpnb1.L		cdx4.L	Xetrov90013256m.L	c3ar1.L		itsn1.L	trmt6.S	kpnb1.L
homez.L	Xelaev18003120m	ankib1.S		esrrg.L	Xelaev18003120m	ccng1.L		homez.L	hic2.L	ankib1.S
scamp1.S	hoxc13.S	emsy.S		tbx3.S	hoxc13.S	parp3.L		scamp1.S	txn2.S	emsy.S
gpt2.S	LOC108718650	sox13.S		cdx4.S	LOC108718650	plk2.S		gpt2.S	gga1.L	sox13.S
bdp1.S	carmil3	ptges2.L		celf3.S	carmil3	mdm2.L		bdp1.S	eif4enif1.S	ptges2.L
per3.S	tnfrsf6b.L	mast2.S		tcn2.S	tnfrsf6b.L	mars2		per3.S	blcap.S	mast2.S
ralb.L	dusp10.2.S	got2.L		nppb.S	dusp10.2.S	arhgap36.L		ralb.L	sbf2.L	got2.L
igf2r.L	wnt7a.S	ankrd13c.S		nptx2.S	wnt7a.S	egln3.L		igf2r.L	rapgef1.S	ankrd13c.S
pxn.L	Xelaev18002025m	znf335.L		gata3.L	Xelaev18002025m	arrdc3.L		pxn.L	ccnb2.S	znf335.L
pag1.L	bhlhe40.L	inf2.S		fkbp9.L	bhlhe40.L	cyp27b1.L		pag1.L	habp4.S	inf2.S
atrip.S	gata2.L	fry.L		gata3.S	gata2.L	efnb2.L		atrip.S	dnajc13.L	fry.L
smarca5.S	otx2.L	patl2.L		dlx2.S	otx2.L	egln3.S		smarca5.S	foxr1.L	patl2.L
ccnyl1.S	nr4a2.S	cracr2b.L		phospho1.S	nr4a2.S	klf10.L		ccnyl1.S	aldh2.L	cracr2b.L
jmjd1c.L	ugcg.S	dhx35.S		tbx2.L	ugcg.S	txnip.L		jmjd1c.L	psme3.S	dhx35.S
dpf2.L	irx3.S	cited2.L		onecut1.2.S	irx3.S	ddit4.S		dpf2.L	parp15	cited2.L
rnf13.S	g0s2.L	anapc7.L		LOC108699846	g0s2.L	zfand5.S		rnf13.S		anapc7.L
daam1.L	hpgd.S	aldh18a1.L		mcidas.L	hpgd.S	alcam.L		daam1.L		aldh18a1.L
zfyve28-like.1.S	parp15	tbp.L		mespa.S	gpd1.L			zfyve28-like.1.S		tbp.L
fbxl19.L	gpd1.L	pou5f3.3.L		LOC108714877	upp2.L			fbxl19.L		pou5f3.3.L
abhd16a.L	upp2.L	tmem131l.L		LOC108716948	dennd2a.L			abhd16a.L		tmem131l.L
ubtd2.L	dennd2a.L	otud4.S		pnck.S	wfdc2.L			ubtd2.L		otud4.S
aaas.L	psme3.S	ulk1.S		npnt.S	MGC82989			aaas.L
mfap1.S	wfdc2.L	c3ar1.L		ccndx.S	akap6-like.S			mfap1.S
sox3.L	MGC82989	ccng1.L		evx1.L	slc45a3.S			sox3.L
bptf.L	akap6-like.S	parp3.L		socs4.S	tmcc1.S			bptf.L
sp5l.L	slc45a3.S	plk2.S		plaur	sds.S			sp5l.L
arhgap35.S	aldh2.L	mdm2.L		LOC108698139	gprc5cl1.L			arhgap35.S
dctpp1.L	foxr1.L	mars2		id4.S	Xelaev18000483m			dctpp1.L
abcd1.L	tmcc1.S	arhgap36.L		tbx3.L	loc108648340.L			abcd1.L
yae1d1.L	dnajc13.L	egln3.L		msx2.L	znf750.S			yae1d1.L
smagp.S	sds.S	arrdc3.L		gcm1.L	ralb			smagp.S
trappc8.L	habp4.S	cyp27b1.L		Xelaev18043506m				trappc8.L
slc39a9.L	gprc5cl1.L	efnb2.L		foxn4.L				slc39a9.L
tgs1.L	ccnb2.S	egln3.S		adora2a.S				tgs1.L
lamp1.L	rapgef1.S	klf10.L		smad9.S				lamp1.L
akap17a.L	sbf2.L	txnip.L		gjc2.L				akap17a.L
cdt1.L	blcap.S	ddit4.S		lmo4.2.S				cdt1.L
dnajc1.S	Xelaev18000483m	zfand5.S		Xelaev18020076m				dnajc1.S
neo1.L	loc108648340.L	alcam.L		muc1.L				neo1.L
gpr155.S	eif4enif1.S			pdgfra.L				gpr155.S
acot11	gga1.L			LOC100486385.L				acot11
pold2.L	txn2.S			aim1l.L				pold2.L
taf9b.L	hic2.L			col17a1.L				taf9b.L
tbc1d12.L	znf750.S			loc108705532.L				tbc1d12.L
tubgcp4.S	trmt6.S			gmnc.L				tubgcp4.S
pprc1.L	cnksr1.L			lrrn1.L				pprc1.L
l2hgdh.L	ralb			tmem200c.S				l2hgdh.L
evi5.S				sox17b.1.S				evi5.S
tsc1.L				nanos3.S				tsc1.L
wdfy3				lmo4.2.L				wdfy3
ipo8				rassf10.L				ipo8
atxn7l3.L				mfsd2a.L				atxn7l3.L
plin3.S				rgs2.L				plin3.S
lrp1.L				msx2.S				lrp1.L
afg3l2				sesn1.S				afg3l2
tctn1.L				ccn1l.S				tctn1.L
ubr5.L				capn8.S				ubr5.L
nsmaf.L				crabp2.S				nsmaf.L
appl2.L				pygm.S				appl2.L
cog3.L				ventx3.2.S				cog3.L
dcaf5.L				samd12				dcaf5.L
prkcsh.S				tmem213.L				prkcsh.S
kidins220.L				tbx2.S				kidins220.L
dcun1d3.S				fermt1.S				dcun1d3.S
usp32.S				lancl3.S				usp32.S
LOC108706563				ptpn14.S				LOC108706563
lysmd4.L				foxi1.L				lysmd4.L
grinl1a.L				cdkn1a.L				grinl1a.L
gpr155.L				ubp1.L				gpr155.L
tubgcp5				ulk1.L				tubgcp5
ppip5k2.L				pcdh9.L				ppip5k2.L
tdrp.S				myb.L				tdrp.S
trim8				sspo.L				trim8
tcf19.L				ankrd65.L				tcf19.L
tbc1d22b.S				vash2.S				tbc1d22b.S
nfxl1.L				slc25a22.L				nfxl1.L
LOC108701166				tuft1.L				LOC108701166
plxnb2.L				c5.2.L				plxnb2.L
arhgef17.L				flrt3.S				arhgef17.L
tyro3.L				dhcr7.L				tyro3.L
taf1a.L				dlx2.L				taf1a.L
ccdc120				rbm24.L				ccdc120
sos2.L				smad6.2.L				sos2.L
ppp4r1l.S				sh3d21.L				ppp4r1l.S
mapkapk2.L				slc9a3r2.L				mapkapk2.L
MGC115657				ccng1.S				MGC115657
tor1aip1-like.L				chrna2.S				tor1aip1-like.L
mllt1.L				LOC108699131				mllt1.L
fbxo45.S				msx1.S				fbxo45.S
plxnb2.S				lox.S				plxnb2.S
LOC108719529				Xelaev18038969m				LOC108719529
tnrc6b.L				uts2r				tnrc6b.L
tnrc18.S				cdkn1a.S				tnrc18.S
idh3a.S				st8sia1.L				idh3a.S
gpi.S				tll1-like.1.L				gpi.S
stambp.S				t.S				stambp.S
usp44.S				notch1				usp44.S
gemin2.S				LOC108711723				gemin2.S
tnrc6b.S				vcan.L				tnrc6b.S
ralgps2.L				ubald2.L				ralgps2.L
brox.S				mdk.S				brox.S
cbl.S				myc.L				cbl.S
slc20a2.L				aplnr.S				slc20a2.L
tpbg.L				fzd10.S				tpbg.L
akap13.S				abcc5				akap13.S
wasf3.L				kcnk5				wasf3.L
pex1.L				msi1.S				pex1.L
sox2.L				ventx3.2.L				sox2.L
rab5d.S				sox18.L				rab5d.S
tmtc3.L				crp				tmtc3.L
hspbap1.L				msx1.L				hspbap1.L
aes.L				xkr8.S				aes.L
ttc9.L				loc100494211.L				ttc9.L
arhgef7.S				kiaa1614.L				arhgef7.S
vldlr.S				spin1.S				vldlr.S
pou2f1.L				gprc5b.L				pou2f1.L
ankrd28				clcnkb				ankrd28
tmem255a.S				agap2				tmem255a.S
rpa2.L				lrrn1.S				rpa2.L
crtc3.S				cdx2.L				crtc3.S
lpgat1.S				s100a2				lpgat1.S
dcp1a				fbxw7.L				dcp1a
znf618.S				col1a2.L				znf618.S
smg7.L				numbl.L				smg7.L
arl9.L				mafb.L				arl9.L
sorl1.L				post7p.L				sorl1.L
plekhg4.L				nav2.L				plekhg4.L
LOC108710058				Xelaev18022564m				LOC108710058
cct6a.L				ccno.L				cct6a.L
usp38.L				pidd1.L				usp38.L
man2a2.L				LOC100495010.S				man2a2.L
styx.S				gss.L				styx.S
LOC108717147				sox4.S				LOC108717147
prrg1.L				xfrp				prrg1.L
lpgat1.L				skida1.S				lpgat1.L
fam134c.L				post.L				fam134c.L
slc6a14.2.L				myt1.L				slc6a14.2.L
snx9.S				aplnr.L				snx9.S
ccpg1.S				post10.L				ccpg1.S
wdr59.L				cebpa.L				wdr59.L
dag1.S				ccdc173.L				dag1.S
magi1.L				blvra.L				magi1.L
actr1a.S				smad7.S				actr1a.S
orai2.S				bcor.L				orai2.S
oaf.S				tuba3c.S				oaf.S
ube2j2.L				cecr1.S				ube2j2.L
xpo4.L				abhd3.S				xpo4.L
tmbim1.L				gfpt1.S				tmbim1.L
mtmr10.S				tbc1d31.L				mtmr10.S
tank.S				hspg2.L				tank.S
lrrc19.L				tubb2b.L				lrrc19.L
kdm5c.S				naalad2.S				kdm5c.S
atp8b1.L				dynll1.L				atp8b1.L
pik3ca.S				prph.L				pik3ca.S
usp22 a				id2.L				usp22 a
nde1.L				nefl.L				nde1.L
pcmtd2.L				myc.S				pcmtd2.L
samd4a.S				stard10.S				samd4a.S
pex12.L				klf11.S				pex12.L
pxn.S				anxa4.S				pxn.S
gcc1.L				LOC108719633				gcc1.L
adamts1.S				map1lc3a.L				adamts1.S
fbxl4.S				id2.S				fbxl4.S
edem3.L				LOC108719506				edem3.L
mfsd14a				tubb4b.L				mfsd14a
pigb.L				prpsap1.S				pigb.L
inpp5b.L				napb				inpp5b.L
ptpra.S				Xelaev18009838m				ptpra.S
rel.S				kcnc4				rel.S
abl2.L				eif4a2.L				abl2.L
slc9a1.L				zmcm3.L				slc9a1.L
ism1.L				bcorl1.S				ism1.L
eea1.S				wdr13.L				eea1.S
ins				Xelaev18040635m				ins
smtn.L				mab21l2.S				smtn.L
eea1.L				arhgef3.2.S				eea1.L
slc30a6.S				efna1.L				slc30a6.S
mios.L				txnip.S				mios.L
rassf3.S				csrnp1.L				rassf3.S
ssx2ip.L				plk2.L				ssx2ip.L
ide.S				relt.L				ide.S
ctif.S				top2b.S				ctif.S
maz				mob2.2.S				maz
tapt1.S				sesn1.L				tapt1.S
zcchc11.S				notch1.L				zcchc11.S
irak1.L				klf10.S				irak1.L
fam46b.L				rap2b.L				fam46b.L
agap1				LOC108707322				agap1
LOC108695529				pdgfa.L				LOC108695529
mfsd11.S				slc2a1.L				mfsd11.S
znf143.L				gen1				znf143.L
dnajc1.L				tuba4a.S				dnajc1.L
srgap2.L				fam84b.S				srgap2.L
LOC108719517				ndufa8.L				LOC108719517
e2f4.L				dynll1.S				e2f4.L
fcho2.L				sgk1.S				fcho2.L
rictor				cdc42ep4.S				rictor
slc39a10				atp1b1.S				slc39a10
luzp1.S				fam222a.L				luzp1.S
slc15a4.S				loc100487575.L				slc15a4.S
atp2c1				mxi1.S				atp2c1
slc9a6.L				LOC108695556				slc9a6.L
med13l.S				Xelaev18012294m				med13l.S
nipa2.S				zhx1.S				nipa2.S
pip4k2b.S				apeh.L				pip4k2b.S
atp13a4.S				tuba4a.L				atp13a4.S
slc20a1.S				zswim5				slc20a1.S
smc5.S				MGC82975				smc5.S
MGC85180				scube2.L				MGC85180
dennd4a.L				zfand5.L				dennd4a.L
klhl7.S				fpgs.S				klhl7.S
rnf41.L				sertad1.S				rnf41.L
clk2.S				otud1.L				clk2.S
tbc1d30.L				asb7.L				tbc1d30.L
nedd4l.S				esco2				nedd4l.S
wdr37.L				anln-like.1.L				wdr37.L
dgke.S				slc7a5.L				dgke.S
ikbkg.L				ptma.S				ikbkg.L
gmnn.S				atf4.S				gmnn.S
ppp3cc.L				hid1.S				ppp3cc.L
ptcd2.L				acvr1.L				ptcd2.L
herc1.L				tgif1.S				herc1.L
kmt2b				cass4.L				kmt2b
MGC115510				ppp1r8.L				MGC115510
LOC108704260				mbd6.L				LOC108704260
etnk1.S				tgif1.L				etnk1.S
spopl.S				scube2.S				spopl.S
ptpn23.S				e2f7.L				ptpn23.S
pik3ca.L				iffo2				pik3ca.L
LOC108703749				fbxl20.S				LOC108703749
tprn				pdk4.L				tprn
cse1l.S				acer2.L				cse1l.S
vcpip1.S				grx5				vcpip1.S
pef1.S				hexim1.L				pef1.S
dop1a				mesdc1.S				dop1a
ppp1r13b.L				ncapd2.S				ppp1r13b.L
cep164.L				acvr1.S				cep164.L
fcho1.S				crebzf.S				fcho1.S
pik3r2.S				vwa5a.L				pik3r2.S
ankrd13c.L				sec14l1.L				ankrd13c.L
ccdc88a				arrdc3.S				ccdc88a
ttc31.L				rap2b.S				ttc31.L
zic2.S				atp1a1.L				zic2.S
kat2b				ctps1.S				kat2b
fam73a.L				zbtb21.L				fam73a.L
rad51d.L				rnf11.L				rad51d.L
rapgef6.S				LOC100158389				rapgef6.S
arhgef11.L				myl9.L				arhgef11.L
cebpg.L				actb.S				cebpg.L
mid1.L				znf292.S				mid1.L
svil.L				prpf39.1.S				svil.L
slc25a36.S				ube2c.S				slc25a36.S
LOC108708787				rpl37.S				LOC108708787
LOC108704241				luc7l2				LOC108704241
fer.L				cltc.L				fer.L
trpm7.S				noc4l.S				trpm7.S
hells.L				pcf11.S				hells.L
mov10l1.L				rad51ap1.L				mov10l1.L
rnf219.L				wdr83os.L				rnf219.L
zfhx3.S				katnal2.L				zfhx3.S
klhdc10				gm20188				klhdc10
dars.L				mlec.S				dars.L
apitd1.L				itm2a.L				apitd1.L
fzd4.L				actb.L				fzd4.L
cgnl1.S				ubb.L				cgnl1.S
gab2.L				ppp1cb.L				gab2.L
ubtd2.S				eif5a.L				ubtd2.S
glce.S				rpl27a.S				glce.S
tbc1d14.L				mcl1.L				tbc1d14.L
ndst2.L				rps9				ndst2.L
jmy.S				ier2.L				jmy.S
tanc1-like.S				znf318.S				tanc1-like.S
LOC108699896				LOC108695506				LOC108699896
xpo6.S				rps2				xpo6.S
rhof.L				rps2.L				rhof.L
fam208b.S				arf4				fam208b.S
tmem181.L				gpcpd1.L				tmem181.L
Xelaev18033527m				exosc5.L				Xelaev18033527m
plxna3.S				msl3.L				plxna3.S
arhgef18.S								arhgef18.S
disp1.L								disp1.L
tmem51.L								tmem51.L
bfar.L								bfar.L
tmem140.L								tmem140.L
LOC108704624								LOC108704624
kif13a								kif13a
gtpbp6.S								gtpbp6.S
fam177a1.L								fam177a1.L
capn15.L								capn15.L
abcb6.L								abcb6.L
st3gal2.1.L								st3gal2.1.L
golga1.L								golga1.L
usp34.L								usp34.L
ercc6l2.L								ercc6l2.L
cbwd1.1.S								cbwd1.1.S
mtmr10.L								mtmr10.L
cdc42se2-like.2.L								cdc42se2-like.2.L
rfc1.L								rfc1.L
zfp661								zfp661
trappc8.S								trappc8.S
rasal2.S								rasal2.S
fam110c.S								fam110c.S
cbwd1.1.L								cbwd1.1.L
dip2a.S								dip2a.S
frmd6.L								frmd6.L
rnf149.L								rnf149.L
baz1a.S								baz1a.S
wwp1.S								wwp1.S
vps50.L								vps50.L
aebp2.S								aebp2.S
mast4.S								mast4.S
socs5.S								socs5.S
dapk1.L								dapk1.L
exd1.L								exd1.L
prmt5.L								prmt5.L
taf4b.S								taf4b.S
rnf19b.S								rnf19b.S
elmsan1.S								elmsan1.S
kank1.L								kank1.L
arhgap35.L								arhgap35.L
fbxo42.L								fbxo42.L
scap.L								scap.L
akap13.L								akap13.L
apcdd1.L								apcdd1.L
chmp1a.S								chmp1a.S
arhgap32.S								arhgap32.S
mkx.S								mkx.S
rnf217.L								rnf217.L
myo1e.1.L								myo1e.1.L
bri3.S								bri3.S
dnajb14.L								dnajb14.L
slc16a7.S								slc16a7.S
sos1.L								sos1.L
surf1.L								surf1.L
il17rd.S								il17rd.S
lpar1.S								lpar1.S
tmem110.L								tmem110.L
ncoa7.L								ncoa7.L
zic1.L								zic1.L
def8.S								def8.S
keap1.L								keap1.L
polg.L								polg.L
sbf2.S								sbf2.S
agap1.L								agap1.L
rassf2.L								rassf2.L
tank.L								tank.L
plcl2.L								plcl2.L
chst13.S								chst13.S
nfkbil1.L								nfkbil1.L
arhgef7.L								arhgef7.L
fbxl18.L								fbxl18.L
ate1.L								ate1.L
plpp5.L								plpp5.L
arhgap18.L								arhgap18.L
asap2.S								asap2.S
scai								scai
rapgef1.L								rapgef1.L
snph.S								snph.S
plin2.S								plin2.S
c14orf166.S								c14orf166.S
tpcn2.L								tpcn2.L
bbs2.S								bbs2.S
sipa1l3.L								sipa1l3.L
c1galt1.S								c1galt1.S
pag1.S								pag1.S
LOC108711716								LOC108711716
rnf8.L								rnf8.L
LOC108714686								LOC108714686
trim8.L								trim8.L
klhl13.L								klhl13.L
srebf2.L								srebf2.L
pgm2l1								pgm2l1
peak1.L								peak1.L
fam46b.S								fam46b.S
arhgef12.L								arhgef12.L
tspoap1.L								tspoap1.L
chmp1a								chmp1a
MGC85210								MGC85210
ext1.L								ext1.L
stxbp6.L								stxbp6.L
borcs6.S								borcs6.S
dgkh-like.S								dgkh-like.S
pxylp1.S								pxylp1.S
Xelaev18003062m								Xelaev18003062m
aak1								aak1
wdr60.L								wdr60.L
ets1.L								ets1.L
plxnb3.S								plxnb3.S
limd2.S								limd2.S
inf2.L								inf2.L
ralgapb.L								ralgapb.L
dapk1.S								dapk1.S
filip1.L								filip1.L
loc100493164.L								loc100493164.L
ccdc171								ccdc171
ets1.S								ets1.S
helb.L								helb.L
fam53a.S								fam53a.S
bcar3.L								bcar3.L
kcnj5.L								kcnj5.L
mlh1.S								mlh1.S
klhdc10.L								klhdc10.L
acox2.L								acox2.L
styx.L								styx.L
zbtb16.S								zbtb16.S
arhgap21.L								arhgap21.L
ankrd54.L								ankrd54.L
iffo1.L								iffo1.L
tmem57.L								tmem57.L
ccnb1.L								ccnb1.L
sec22a.L								sec22a.L
kctd9.L								kctd9.L
tmem169.L								tmem169.L
acod1.S								acod1.S
cmtm7.S								cmtm7.S
tgds.S								tgds.S
marchf2								marchf2
rnf19b.L								rnf19b.L
acap3.L								acap3.L
efna5.L								efna5.L
rif1.S								rif1.S
tmcc2.S								tmcc2.S
tubgcp3.L								tubgcp3.L
dnajc13.S								dnajc13.S
znf577.S								znf577.S
rgs12.S								rgs12.S
zic2.L								zic2.L
MGC68639								MGC68639
fam102b.L								fam102b.L
aktip.L								aktip.L
palb2.L								palb2.L
LOC108709196								LOC108709196
slc30a5.S								slc30a5.S
camsap1.L								camsap1.L
lhx3.S								lhx3.S
slc25a37.L								slc25a37.L
pigc.S								pigc.S
ccnb1.S								ccnb1.S
socs1.L								socs1.L
Xelaev18019693m								Xelaev18019693m
mid1.S								mid1.S
ago1.L								ago1.L
pou5f3.3.S								pou5f3.3.S
pik3cb.L								pik3cb.L
foxh1.S								foxh1.S
hprt1.L								hprt1.L
plcl2.S								plcl2.S
c1orf116.L								c1orf116.L
arhgap26.S								arhgap26.S
adh5.L								adh5.L
c11orf96.S								c11orf96.S
stc1.L								stc1.L
mkl1.S								mkl1.S
LOC100127794.L								LOC100127794.L
cdc6.S								cdc6.S
LOC108695571								LOC108695571
LOC108717918								LOC108717918
aak1.S								aak1.S
dock9								dock9
nlrx1.L								nlrx1.L
pacs2.L								pacs2.L
tmem170a.S								tmem170a.S
bcl6.L								bcl6.L
ackr3.S								ackr3.S
prkch.L								prkch.L
vps13d.L								vps13d.L
letm2.S								letm2.S
tmem57.S								tmem57.S
hes3.S								hes3.S
apold1.L								apold1.L
dand5.L								dand5.L
b9d2.L								b9d2.L
Xelaev18030392m								Xelaev18030392m
prr14l.L								prr14l.L
trim2.L								trim2.L
cd274.L								cd274.L
dand5.S								dand5.S
MGC83539								MGC83539
mob3c.S								mob3c.S
foxi2.L								foxi2.L
foxi2.S								foxi2.S
akna.S								akna.S
kiaa0922.S								kiaa0922.S
socs1.S								socs1.S
cish.S								cish.S
hes7.1.L								hes7.1.L
cish.L								cish.L
socs3								socs3
foxd4l1.1.L								foxd4l1.1.L
admp.S								admp.S
socs3.L								socs3.L
gata4.S
cdx4.L
esrrg.L
tbx3.S
cdx4.S
celf3.S
tcn2.S
nppb.S
nptx2.S
gata3.L
fkbp9.L
gata3.S
dlx2.S
phospho1.S
tbx2.L
onecut1.2.S
LOC108699846
mcidas.L
mespa.S
LOC108714877
LOC108716948
pnck.S
npnt.S
ccndx.S
evx1.L
socs4.S
plaur
LOC108698139
id4.S
tbx3.L
msx2.L
gcm1.L
Xelaev18043506m
foxn4.L
adora2a.S
smad9.S
gjc2.L
lmo4.2.S
Xelaev18020076m
muc1.L
pdgfra.L
LOC100486385.L
aim1l.L
col17a1.L
loc108705532.L
gmnc.L
lrrn1.L
tmem200c.S
sox17b.1.S
nanos3.S
lmo4.2.L
rassf10.L
mfsd2a.L
rgs2.L
msx2.S
sesn1.S
ccn1l.S
capn8.S
crabp2.S
pygm.S
ventx3.2.S
samd12
tmem213.L
tbx2.S
fermt1.S
lancl3.S
ptpn14.S
foxi1.L
cdkn1a.L
ubp1.L
ulk1.L
pcdh9.L
myb.L
sspo.L
ankrd65.L
vash2.S
slc25a22.L
tuft1.L
c5.2.L
flrt3.S
dhcr7.L
dlx2.L
rbm24.L
smad6.2.L
sh3d21.L
slc9a3r2.L
ccng1.S
chrna2.S
LOC108699131
msx1.S
lox.S
Xelaev18038969m
uts2r
cdkn1a.S
st8sia1.L
tll1-like.1.L
t.S
notch1
LOC108711723
vcan.L
ubald2.L
mdk.S
myc.L
aplnr.S
fzd10.S
abcc5
kcnk5
msi1.S
ventx3.2.L
sox18.L
crp
msx1.L
xkr8.S
loc100494211.L
kiaa1614.L
spin1.S
gprc5b.L
clcnkb
agap2
lrrn1.S
cdx2.L
s100a2
fbxw7.L
col1a2.L
numbl.L
mafb.L
post7p.L
nav2.L
Xelaev18022564m
ccno.L
pidd1.L
LOC100495010.S
gss.L
sox4.S
xfrp
skida1.S
post.L
myt1.L
aplnr.L
post10.L
cebpa.L
ccdc173.L
blvra.L
smad7.S
bcor.L
tuba3c.S
cecr1.S
abhd3.S
gfpt1.S
tbc1d31.L
hspg2.L
tubb2b.L
naalad2.S
dynll1.L
prph.L
id2.L
nefl.L
myc.S
stard10.S
klf11.S
anxa4.S
LOC108719633
map1lc3a.L
id2.S
LOC108719506
tubb4b.L
prpsap1.S
napb
Xelaev18009838m
kcnc4
eif4a2.L
zmcm3.L
bcorl1.S
wdr13.L
Xelaev18040635m
mab21l2.S
arhgef3.2.S
efna1.L
txnip.S
csrnp1.L
plk2.L
relt.L
top2b.S
mob2.2.S
sesn1.L
notch1.L
klf10.S
rap2b.L
LOC108707322
pdgfa.L
slc2a1.L
gen1
tuba4a.S
fam84b.S
ndufa8.L
dynll1.S
sgk1.S
cdc42ep4.S
atp1b1.S
fam222a.L
loc100487575.L
mxi1.S
LOC108695556
Xelaev18012294m
zhx1.S
apeh.L
tuba4a.L
zswim5
MGC82975
scube2.L
zfand5.L
fpgs.S
sertad1.S
otud1.L
asb7.L
esco2
anln-like.1.L
slc7a5.L
ptma.S
atf4.S
hid1.S
acvr1.L
tgif1.S
cass4.L
ppp1r8.L
mbd6.L
tgif1.L
scube2.S
e2f7.L
iffo2
fbxl20.S
pdk4.L
acer2.L
grx5
hexim1.L
mesdc1.S
ncapd2.S
acvr1.S
crebzf.S
vwa5a.L
sec14l1.L
arrdc3.S
rap2b.S
atp1a1.L
ctps1.S
zbtb21.L
rnf11.L
LOC100158389
myl9.L
actb.S
znf292.S
prpf39.1.S
ube2c.S
rpl37.S
luc7l2
cltc.L
noc4l.S
pcf11.S
rad51ap1.L
wdr83os.L
katnal2.L
gm20188
mlec.S
itm2a.L
actb.L
ubb.L
ppp1cb.L
eif5a.L
rpl27a.S
mcl1.L
rps9
ier2.L
znf318.S
LOC108695506
rps2
rps2.L
arf4
gpcpd1.L
exosc5.L
msl3.L

## Sheet: St11-12
Temporal DESeq Epi Neur Venn Diagram Gene Lists corresponding with Figure 3B
Total				Increase				Decrease
Epi Only	Neur Only	Overlap		Epi Only	Neur Only	Overlap		Epi Only	Neur Only	Overlap
kif2a.S	crabp2.S	atp2c1		niban2	crabp2.S	otog.L		kif2a.S	cul4b.S	atp2c1
dnaaf1.S	mmp1.S	smagp.S		znf534.L	mmp1.S	fcgbp		dnaaf1.S	cct6a.S	smagp.S
cdt1.L	slc32a1.S	esco1.L		hes8.L	slc32a1.S	slc45a3.S		cdt1.L	ppp1r15b-like.S	esco1.L
bora.S	gabra1.L	LOC100036828		itln1.L	gabra1.L	gata3.S		bora.S	tfap2a.L	LOC100036828
itsn1.L	rgs2.L	dag1.S		hes8.S	rgs2.L	syt8.L		itsn1.L	racgap1.S	dag1.S
myo1c.S	ventx2.1.L	mfsd14b		ppl.S	ventx2.1.L	comt.L		myo1c.S	capn5.S	mfsd14b
gucd1.S	ventx2.2.L	dctpp1.L		hes5.3.S	ventx2.2.L	znf185.L		gucd1.S	rpn1.S	dctpp1.L
aldh3b1.L	crabp2.L	Xelaev18046477m		dmrt2.S	crabp2.L	rab27a.S		aldh3b1.L	srp68.S	Xelaev18046477m
lonrf2.L	mmp19.L	slc9a7.S		atp13a-like.S	mmp19.L	LOC398451		lonrf2.L	cdca7l.L	slc9a7.S
tmem184c.L	stx3.L	letm2.S		foxj1.2.L	stx3.L	dab2ip-like.L		tmem184c.L	arfgap1.S	letm2.S
adam17.S	ccn2	homez.L		mcidas	ccn2	flrt2.L		adam17.S	spty2d1.S	homez.L
LOC108718446	Xelaev18021497m	ralb.L		foxj1.2.S	Xelaev18021497m	mboat1.L		LOC108718446	dbf4b.L	ralb.L
ascc3.L	pvrl4.S	neurl1b.L		kit.S	pvrl4.S	ptk2b.S		ascc3.L	dnajc10.L	slc26a6.L
smtn.L	muc1.L	slc26a6.L		prox1.S	muc1.L	gcm1.L		smtn.L	rfwd2.L	cers3.L
trak2.L	cdc42se2-like.1.L	cers3.L		klf4.S	cdc42se2-like.1.L	MGC80993		trak2.L	fam46c.S	rnf8.L
atg2b.L	fkbp9.L	prdm1.S		isl1.L	fkbp9.L	elf1.S		atg2b.L	gpat4.L	n4bp1.L
umad1.L	LOC108718065	rnf8.L		hes3.3.L	LOC108718065	ppp1r18		umad1.L	stx5.S	rassf2.L
zdhhc16.S	plekha2.S	n4bp1.L		galnt12.L	plekha2.S	stard10.S		zdhhc16.S	tor1b.L	nfkbie.L
trove2.L	meis1.L	rassf2.L		Xelaev18002015m	meis1.L	tesc.L		trove2.L	LOC108701404	tmem255a.S
btrc.S	LOC108704572	nfkbie.L		atp12a.L	LOC108704572	syne3.L		btrc.S	pawr.L	arl15.L
LOC108719053	vwf.L	tmem255a.S		anos1.L	vwf.L	capn8.S		LOC108719053	yrdc.L	mtmr10.L
banp.L	znfx1.L	zic2.S		loc100489456.L	znfx1.L	rbbp8nl.L		banp.L	ddx1.L	ccdc68.S
usp19.L	otx2.L	hdac7.L		loc100145533.S	otx2.L	post7p.L		usp19.L	twistnb.L	atxn3.L
prkar2b.S	abca4.L	arl15.L		tbx20.L	abca4.L	b3gnt7.L		prkar2b.S	dusp11.L	styx.S
tstd2.S	LOC108708063	mtmr10.L		fam3d.S	LOC108708063	pmm2.L		tstd2.S	fam46c.L	usp38.L
tnrc18.S	carmil3	ccdc68.S		vill.S	carmil3	fer1l4		tnrc18.S	gatad1.L	hexdc.L
MGC84586	LOC108711024	atxn3.L		myb.L	LOC108711024	post10.L		MGC84586	raf1.S	cdc42se2-like.2.L
inpp4a.S	rab34.L	styx.S		gata6.S	rab34.L	post.L		inpp4a.S	usp22 a	MGC83970
xxylt1.L	fam102a.L	akap12.L		tbx3.L	fam102a.L	slfn13.L		xxylt1.L	pcyox1.L	gemin2.S
ccdc34.S	otx2.S	usp38.L		bmp7.1.S	otx2.S	mdk.S		ccdc34.S	mex3d.S	fam20b.S
rwdd1.L	ccdc129.L	hexdc.L		dipk1c.S	ccdc129.L	LOC100486385.S		rwdd1.L	poldip2.S	fam107b.S
plxna1.L	rnf223.L	cdc42se2-like.2.L		tril.L	rnf223.L	gata2.L		plxna1.L	LOC108705673	LOC108719063
wdr44.S	baiap2	MGC83970		eya1.L	baiap2	col18a1.L		wdr44.S	slc9a6.L	LOC108719547
ssbp2.S	fn3k.L	gemin2.S		gdpd1.L	fn3k.L	aacs.L		ssbp2.S	sbf2.L	slc9a1.L
taok1.L	adgrf1.L	fam20b.S		Xelaev18045499m	adgrf1.L	errfi1.L		taok1.L	LOC108704624	kiaa0513.L
pag1.L	hk1.L	prdm14.S		hspg2.L	hk1.L	rab11fip3.L		pag1.L	slc39a9.L	arhgef12.L
map7d1.S	prr14l.L	fam107b.S		slc45a3.L	ttc22.L	lmo4.2.S		map7d1.S	mfsd11.S	tapt1.S
dhcr24.L	ttc22.L	LOC108719063		slc38a2.L	itga6.L	gata2.S		dhcr24.L	ppp1r15b.L	dap.L
gpatch2.L	itga6.L	LOC108719547		mcidas.L	pax3.S	msi1.S		gpatch2.L	nploc4.L	ptges2.L
golim4.S	pax3.S	slc9a1.L		tbx3.S	cfh.L	sh3d21.L		golim4.S	abl2.L	appl2.L
atg2b.S	cfh.L	dnmbp.L		vill.L	slc43a2.S	atp1a1.L		atg2b.S	insm1.S	pik3r2.L
rad54l	slc43a2.S	kiaa0513.L		LOC100486385.L	elavl3	plch1		rad54l	trmt6.S	dhx35.S
rpa3.S	elavl3	arhgef12.L		tuba1a.S	ptprz1.L	prpsap1.S		rpa3.S	fam20b.L	fam210a.S
mesdc2.L	ptprz1.L	tapt1.S		ankrd22.S	fam198a.L	wwtr1.S		mesdc2.L	fbxo42.L	pef1.S
hs2st1.S	fam198a.L	dap.L		foxn4.S	mms19	bahcc1.S		hs2st1.S	LOC108699992	ets1.L
plcd3.L	mms19	ptges2.L		rab15.L	igfbp2	nav2.L		plcd3.L	naa15.S	uba3.S
pnpt1.S	ets1.S	appl2.L		krt16.L	scn2a	hes3.1.L		pnpt1.S	cmtm4.S	ralgps2.L
ccnb1.2.L	atoh1.S	pik3r2.L		aim1.S	c14orf37.L	creb3l2.L		ccnb1.2.L	kif22.L	inf2.L
sec24b.L	igfbp2	dhx35.S		vgll1.L	eps8l1.L	scnn1a.L		sec24b.L	pim3.S	pou5f3.3.L
inpp5f.L	scn2a	fam210a.S		dmrta2.S	foxb1.S	scnn1a.S		inpp5f.L	scn1b.S	Xelaev18024710m
fadd.S	c14orf37.L	pef1.S		tnni2.L	foxd4l1.1.S	ahnak.L		fadd.S	dus4l.L	LOC108711716
uxs1.S	eps8l1.L	ets1.L		parm1	hpgd.S	tm9sf3.L		uxs1.S	wdr37.L	ralgapa1.S
dpy19l3.L	foxb1.S	uba3.S		slc26a4l.L	tnfrsf6b.L	zmiz2.S		dpy19l3.L	stk35.S	ccdc88a
ube2j1.L	foxd4l1.1.S	ralgps2.L		ag1.S	foxd4l1.L	stard10.L		ube2j1.L	rita1.S	dapl1.L
nkrf.L	hpgd.S	inf2.L		foxj1.S	fucolectin.S	notch2.L		nkrf.L	ccny.L	pag1.S
kmt5a.L	tnfrsf6b.L	tpbg.L		rab3d.L	mrc2.S	fam174b.L		kmt5a.L	ifrd2.S	foxh1.S
ankrd13c.S	atoh1.L	pou5f3.3.L		spns1	id3.S	clcn5.L		ankrd13c.S	h2afj.L	znf33a.L
ccdc90b	foxd4l1.L	plekhg1.L		capn8.2.L	shroom3.L	proser1.L		ccdc90b	slc18a2.L	nlk.L
ern1.S	fucolectin.S	amotl2.S		nefm.L	stard13.S	vwa5a.L		ern1.S	h2afj.S	ccdc88a.S
acadsb.L	mrc2.S	Xelaev18024710m		gadd45b.L	kmo.L	cltc.L		acadsb.L	znf282.S	cracr2b.L
natd1.L	id3.S	LOC108711716		arid3a	scarb1.S	sspo.L		natd1.L	slc8a3.L	cited2.L
kdm4c.L	shroom3.L	ralgapa1.S		slc9a3r2.L	id3.L	phldb1.S		kdm4c.L	ythdc2.L	arhgap26.S
abr.L	stard13.S	zic2.L		prrt3-like.L	fhl3.L	acvr1.L		abr.L	chmp1a.S	LOC108719557
arfgef1	kmo.L	ccdc88a		slc17a9.S	crb2.L	sec14l1.L		arfgef1	otud4.S	Xelaev18030392m
lrp1.S	scarb1.S	dapl1.L		LOC108710463	kcnj15.L	fam222a.L		lrp1.S	ern2.S	foxi2.S
LOC108713105	insm1.L	LOC108701422		hes9-1.S	zfp36l1.L			LOC108713105	polr3g.L
nusap1.S	id3.L	pag1.S		rasal1.L	chrna2.L			nusap1.S	c11orf96.S
limk2.S	fhl3.L	foxh1.S		znf827.L	thbs1.L			limk2.S	insm1.L
smn2.S	crb2.L	znf33a.L		Xelaev18039917m	cnrip1.L			smn2.S	atoh1.L
maea.S	kcnj15.L	nlk.L		myb.S	lrp2.L			maea.S	atoh1.S
rab27b.S	zfp36l1.L	ccdc88a.S		vtcn1.L	adam33.L			rab27b.S	ets1.S
parg.L	chrna2.L	cracr2b.L		pdgfa.S	pax3.L			parg.L	prr14l.L
plekhg4.L	thbs1.L	cited2.L		xk81a1.L	spin1.S			plekhg4.L
snx14.L	cnrip1.L	arhgap26.S		slc1a1.L	LOC100496797.L			snx14.L
pold2.L	lrp2.L	LOC108719557		pcdh8.2.L	tuft1.L			pold2.L
c5orf24.L	adam33.L	Xelaev18030392m		gby.L	ptger2.L			c5orf24.L
acat1.L	pax3.L	foxi2.S		Xelaev18000619m	mras.L			acat1.L
aim1.L	spin1.S	zic3.L		dtx1.L	clcn2.L			aim1.L
grinl1a.S	LOC100496797.L	otog.L		fzd6.L	wnt7a			grinl1a.S
ap5m1.L	tuft1.L	fcgbp		s100a2	fam83f.S			ap5m1.L
rgma.S	ptger2.L	slc45a3.S		bmper.L	uts2r			rgma.S
ttc9.L	c11orf96.S	gata3.S		slc3a2	trpv5.L			ttc9.L
rps6kc1.L	mras.L	syt8.L		tbx2.L	elovl3.L			rps6kc1.L
LOC108719643	clcn2.L	comt.L		ecm1.S	glis2.S			LOC108719643
atp9a	wnt7a	znf185.L		LOC108719358	ptprb.L			atp9a
ranbp9.S	fam83f.S	rab27a.S		sidt1.L	ttyh2.S			ranbp9.S
usp38.S	uts2r	LOC398451		c1orf127.L	LOC108715896			usp38.S
tbc1d4.L	trpv5.L	dab2ip-like.L		LOC108699294	cblb.L			tbc1d4.L
ctdspl.L	elovl3.L	flrt2.L		Xelaev18037313m	a2m.S			ctdspl.L
rbm27.S	glis2.S	mboat1.L		b4galnt3.S	myt1.S			rbm27.S
plpp1.L	ptprb.L	ptk2b.S		hsd3b1.L	arhgap36.L			plpp1.L
txlng.L	ttyh2.S	gcm1.L		sox5	zic5.L			txlng.L
krt19.L	LOC108715896	MGC80993		hspa13.L	nxpe4.S			krt19.L
znf407.L	cblb.L	elf1.S		cfap161.L	mapk8ip2.L			znf407.L
nbeal1.L	a2m.S	ppp1r18		onecut1.2.S	col4a5.S			nbeal1.L
gdpd5.S	myt1.S	stard10.S		hs6st1.S	LOC100496293.L			gdpd5.S
atrx	arhgap36.L	tesc.L		esr10.S	tmem138.L			atrx
snx1.S	zic5.L	syne3.L		clcnkb	slc6a13.L			snx1.S
nabp2.S	nxpe4.S	capn8.S		tll1.S	mmp14.L			nabp2.S
tgs1.L	mapk8ip2.L	rbbp8nl.L		ahnak.S	gli3.L			tgs1.L
casp10.S	col4a5.S	post7p.L		abtb2.L	raig3			casp10.S
kif21a.L	polr3g.L	b3gnt7.L		gnb3.S	drc7			kif21a.L
fam46b.L	LOC100496293.L	pmm2.L		Xelaev18035430m	tnfrsf11a.S			fam46b.L
bloc1s6.S	tmem138.L	fer1l4		LOC108714664	dnmbp.L			bloc1s6.S
nbas.L	slc6a13.L	post10.L		Xelaev18003738m	kiaa1614.L			nbas.L
tll2.L	mmp14.L	post.L		tbx2.S	adh5.S			tll2.L
slc30a9.S	gli3.L	slfn13.L		gfra1	nr2f6.L			slc30a9.S
herc2.S	raig3	mdk.S		lgalsl.L	sema4a.S			herc2.S
tspan14.L	ern2.S	LOC100486385.S		foxj1.L	frmd4a.L			tspan14.L
znf182	otud4.S	gata2.L		hes5.1.S	wfdc2.L			znf182
cbx2.S	drc7	col18a1.L		lsp1.L	amotl2.S			cbx2.S
tdrp.S	tnfrsf11a.S	aacs.L		syt16.L	arl8a.S			tdrp.S
mkln1.S	kiaa1614.L	errfi1.L		cdh2.S	Xelaev18002025m			mkln1.S
zmym4.L	adh5.S	rab11fip3.L		bmerb1	Xelaev18032100m			zmym4.L
uggt2.L	nr2f6.L	lmo4.2.S		ttc39a.L	rin2.L			uggt2.L
rabep2.L	sema4a.S	gata2.S		fzd6.S	fcho1.L			rabep2.L
ppp1r9al.L	chmp1a.S	msi1.S		rab25.L	atp6ap1.1.S			ppp1r9al.L
LOC108704332	frmd4a.L	sh3d21.L		sp5.L	clca3.L			LOC108704332
trpm7.L	wfdc2.L	atp1a1.L		mab21l3.S	arhgef3.2.L			trpm7.L
cisd2.S	ythdc2.L	plch1		slc30a10.S	fam83c.L			cisd2.S
kidins220.L	arl8a.S	prpsap1.S		pou2f3.L	kalrn.L			kidins220.L
psip1	Xelaev18002025m	wwtr1.S		loc100216141.L	map3k1.S			psip1
clcn3.L	Xelaev18032100m	bahcc1.S		rarres1.L	arhgef16.S			clcn3.L
pfkfb3.L	rin2.L	nav2.L		znf827.S	zfp36l1.S			pfkfb3.L
stam.L	fcho1.L	hes3.1.L		rergl	degs3.L			stam.L
arntl.S	atp6ap1.1.S	creb3l2.L		kcnc1	robo3.S			arntl.S
inpp5a.1.S	clca3.L	scnn1a.L		nbeal2.L	zic2.S			inpp5a.1.S
vps13a.L	slc8a3.L	scnn1a.S		krt23.L	zic2.L			vps13a.L
dsg2.S	arhgef3.2.L	ahnak.L		rgl1	fndc3a.S			dsg2.S
snx7.L	znf282.S	tm9sf3.L		tbc1d31.L	sp8.S			snx7.L
tmbim1.L	h2afj.S	zmiz2.S		cdc42bpa.L	notum.S			tmbim1.L
atrn	fam83c.L	stard10.L		LOC108711831	cbfa2t2.L			atrn
velo1.L	kalrn.L	notch2.L		ppl.L	scube2.S			velo1.L
st3gal6.L	map3k1.S	fam174b.L		pvrl1-like.2.S	akap12.S			st3gal6.L
actr1a.S	arhgef16.S	clcn5.L		myo1e	ccdc68.L			actr1a.S
arl5b	zfp36l1.S	proser1.L		plekha7.L	chrna2.S			arl5b
mib2.L	degs3.L	vwa5a.L		Xelaev18030689m	cdh26.S			mib2.L
slc12a6.S	robo3.S	cltc.L		lmo4.1.L	rreb1.S			slc12a6.S
usp36.S	fndc3a.S	sspo.L		gata4.S	prdm1.L			usp36.S
ubr2.L	sp8.S	phldb1.S		rorb.L	LOC108701422			ubr2.L
tpcn1.L	notum.S	acvr1.L		Xelaev18032309m	plekhs1			tpcn1.L
tmem123.L	cbfa2t2.L	sec14l1.L		LOC108700979	trim25.L			tmem123.L
pard3.L	scube2.S	fam222a.L		tll1-like.1.L	LOC108716397			pard3.L
slc2a10.S	akap12.S			xfrp	dennd2c.S			slc2a10.S
pxn.L	ccdc68.L			syt13	MGC83169			pxn.L
ubtd2.L	chrna2.S			cul5.S	ankrd24.L			ubtd2.L
tmcc3.L	cdh26.S			wdr66.L	tgif1.L			tmcc3.L
itpr1.L	rreb1.S			fbxo16.L	gpd1.L			itpr1.L
csnk1e.S	prdm1.L			lmo4.1.S	tpbg.L			csnk1e.S
tlk1.S	plekhs1			fam195a.L	mxi1.L			tlk1.S
med18.S	trim25.L			hes5.1.L	notch1.L			med18.S
rcc1.S	LOC108716397			LOC108714578	zfhx3.L			rcc1.S
tep1.L	dennd2c.S			rsph1.L	trim45.L			tep1.L
abhd16a.L	MGC83169			lrrc36.L	sema6a.S			abhd16a.L
thap1	ankrd24.L			esrra.L	chsy1.L			thap1
znf518b.L	slc18a2.L			golm1.L	atp6a1			znf518b.L
tmem51.L	tgif1.L			comt.2.S	hoxc12.S			tmem51.L
adam28.1.S	gpd1.L			Xelaev18017809m	fgd1.S			adam28.1.S
casp8ap2.L	h2afj.L			bcat1.L	lrig1.L			casp8ap2.L
plxnb2.L	mxi1.L			esrrg.S	dyrk3.L			plxnb2.L
ipo13.S	notch1.L			gne.S	rasgef1b.L			ipo13.S
atp8b4.L	zfhx3.L			tbc1d24.2.S	dennd2a.L			atp8b4.L
rnf14.5.S	trim45.L			lef1.L	greb1l			rnf14.5.S
ankrd28	sema6a.S			degs3.S	cfp.L			ankrd28
arl5a.S	chsy1.L			LOC108704696	znf608			arl5a.S
pdcd6.L	atp6a1			dedd2.S	fnip2.L			pdcd6.L
gpi.S	hoxc12.S			vwf	trpm4			gpi.S
alkbh8.S	ifrd2.S			efnb3	hdac7.L			alkbh8.S
dph5.S	fgd1.S			LOC108701745	b4galt3.L			neurl1b.L
LOC108719510	lrig1.L			b4galnt3.L	gprc5cl1.L			dph5.S
neil3.L	ccny.L			rab6b.L	arhgap39			LOC108719510
gdf9.L	dyrk3.L			nr6a1.S	tmem265.L			neil3.L
pcdh8.L	rasgef1b.L			krt5.7.L	LOC108698716			gdf9.L
sin3b.L	dennd2a.L			sgsm3.S	tuba1cl.2.S			pcdh8.L
ap2b1.L	greb1l			lrp4.S	LOC108697464			sin3b.L
amfr.L	cfp.L			slc44a3.L	krt5.7.S			ap2b1.L
pex14.L	znf608			crocc2	cnfn.1.L			amfr.L
fez2.L	fnip2.L			zbtb46.S	apeh.L			pex14.L
plk3.L	trpm4			gdpgp1.S	rhebl1.L			fez2.L
pid1.L	b4galt3.L			specc1l	ccng1.L			plk3.L
slc22a15.2.S	gprc5cl1.L			vsig8.L	tmem79.L			pid1.L
ipo8	arhgap39			pmepa1.S	lin28a.L			slc22a15.2.S
tmf1.L	tmem265.L			ablim1.S	aqp4			ipo8
lrrfip2.L	LOC108698716			emp2.L	Xelaev18001646m			tmf1.L
mios.L	tuba1cl.2.S			samd15.L	gnb3.L			lrrfip2.L
abhd17b.S	LOC108697464			cdc42bpa.S	ip6k2.L			mios.L
LOC108696874	rita1.S			efhc1.L	rbms2.S			abhd17b.S
nr2c1.S	krt5.7.S			atp6v0a4.L	ccng1.S			LOC108696874
klc1.L	cnfn.1.L			ephb2.S	angpt4.S			nr2c1.S
best2.L	apeh.L			slc22a4.L	fzd8.L			klc1.L
sesn3.S	stk35.S			bmp7.1.L	ncoa2.L			best2.L
jak2.L	rhebl1.L			dgkk.L	znf581.S			prdm1.S
dhrs7.L	ccng1.L			LOC108709394	ptch2.L			sesn3.S
hmgxb3.L	tmem79.L			c6orf132	fam174b.S			jak2.L
itprip.S	lin28a.L			hspa5	prdm14.S			dhrs7.L
tubd1.L	aqp4			xk.L	znf608.S			hmgxb3.L
faah2	Xelaev18001646m			trim29.L	LOC494849			itprip.S
gpc4.L	gnb3.L			slc9a3r2.S	nxpe4			tubd1.L
dcaf6.L	ip6k2.L			slc35c1.L	znf710.L			faah2
lrp1.L	rbms2.S			capns1.L	mn1.L			gpc4.L
sh3bp4.L	ccng1.S			nek2.L	zic3.L			dcaf6.L
ppp1cc.L	angpt4.S			kit.L	evpl.L			lrp1.L
ubr2.S	wdr37.L			dlx2.L	alpl.L			sh3bp4.L
dgcr6.S	fzd8.L			gpatch8.L	slc7a4.L			ppp1cc.L
lclat1.S	ncoa2.L			ccdc63.S	lrp10.S			ubr2.S
cep120.L	dus4l.L			Xelaev18005230m	LOC108699553			dgcr6.S
LOC108704201	znf581.S			arhgap23.L	rreb1.L			lclat1.S
dact1.S	ptch2.L			dnajb9.L	plekhg1.L			cep120.L
tyro3.L	fam174b.S			lgalsl.S	ablim1			LOC108704201
lrrc28.L	scn1b.S			dgkd-like.L	cyp1a1.L			dact1.S
krit1.L	znf608.S			ubald2.L	scube2.L			tyro3.L
zdhhc5.L	LOC494849			fzd10.S	c3.L			lrrc28.L
f2rl1.S	nxpe4			lzts2.S	prdm14.L			krit1.L
smarca5.S	znf710.L			pmepa1.L	egln3.L			zdhhc5.L
rmdn3.L	mn1.L			ddx54	net1.S			f2rl1.S
mphosph9.L	pim3.S			blvra.L	Xelaev18043700m			smarca5.S
abhd17a.L	evpl.L			actn1.L	ranbp3l.L			rmdn3.L
cbl.S	alpl.L			dlx3.L	gen1			mphosph9.L
mterf3.S	kif22.L			eif4g1.L	tmem238			abhd17a.L
kctd6.L	slc7a4.L			LOC108697430	krt.L			cbl.S
dcaf5.S	lrp10.S			Xelaev18043506m	lsp1.S			mterf3.S
pacs1.L	LOC108699553			chsy1.S	arap1			kctd6.L
smtnl2.S	cmtm4.S			fzd3.L	jmjd1c.L			dcaf5.S
tsc1.L	rreb1.L			rnf208.L	cables2.L			pacs1.L
ripor1.L	ablim1			sytl2	trim71.S			smtnl2.S
LOC108719494	cyp1a1.L			lrmp.L	gltscr1.S			tsc1.L
dgkz	scube2.L			pprc1	jmjd1c.S			ripor1.L
usp25.L	c3.L			rassf10.L	arg2.S			LOC108719494
gpr155.L	prdm14.L			sytl4.S	setd2.L			dgkz
bnipl.L	egln3.L			eya1.S	lefty.L			usp25.L
pdpr.L	net1.S			MGC81163	zmynd8.S			gpr155.L
tax1bp1.L	Xelaev18043700m			pkp3.S	sds.L			bnipl.L
csnk1g3.S	ranbp3l.L			ctbs.S	zfand5.L			pdpr.L
calhm2.L	naa15.S			atg16l2	slc4a7.L			tax1bp1.L
polg.L	gen1			ccno.L	map3k1.L			csnk1g3.S
ccar1.L	LOC108699992			slc17a9.L	upk2.S			calhm2.L
dlg5.L	tmem238			asl.L	lin28a.S			polg.L
znf845	krt.L			rbbp8nl.S	sulf1.L			ccar1.L
pcmtd2.L	lsp1.S			galnt10.L	rhpn2.L			dlg5.L
nde1.L	arap1			tcp11l2.L	sfrp2.L			znf845
per3.S	jmjd1c.L			trib1.L	g0s2.L			pcmtd2.L
anks1a.S	cables2.L			ccdc151.L	cass4.L			nde1.L
nfkb2.S	trim71.S			sept5.L	guca1a.S			per3.S
smagp.L	gltscr1.S			tead4.L	cdc42bpb.L			anks1a.S
znf239	fbxo42.L			chd2.L	lrig3.S			nfkb2.S
tarbp1.L	jmjd1c.S			znf644.L	neurl1b.L			smagp.L
numa1.S	fam20b.L			LOC108704672	smtn.S			znf239
kank3.S	trmt6.S			LOC108710484	usp54.L			tarbp1.L
pdk4.S	insm1.S			LOC108708333	cdh1.S			numa1.S
batf3.S	arg2.S			esrp1.L	slc2a2.L			kank3.S
camsap2	setd2.L			anxa2.S	myo9a			pdk4.S
ptp4a1.L	lefty.L			pnck.S	znf219.L			batf3.S
klf4	zmynd8.S			rbm47.L	acvr1.S			camsap2
ndst1.S	abl2.L			esrp1.S	cdc25b.L			ptp4a1.L
exoc5.L	sds.L			foxn4.L	kdm2b.L			klf4
dusp5.S	nploc4.L			smug1.L	gpr4			ndst1.S
nhej1.S	ppp1r15b.L			cyp2ac1	gigyf2.L			exoc5.L
tlk1.L	mfsd11.S			prickle2.S	zfand5.S			dusp5.S
trpv4.L	zfand5.L			chpf.S	gne.L			nhej1.S
xarp.L	slc39a9.L			adgrl2.S	alcam.L			tlk1.L
apcdd1.L	slc4a7.L			amotl1.L	prom1.L			trpv4.L
enox1.S	map3k1.L			znrf3.L	trim71			zic2.S
cr1b	upk2.S			cxcl12.L	LOC108717895			xarp.L
irx1.L	lin28a.S			armc4.S	akap12.L			apcdd1.L
gas2l3.L	sulf1.L			dgka.L	plec.S			enox1.S
git2.L	rhpn2.L			mfsd6l.L	aplp2.L			cr1b
LOC105947450.S	LOC108704624			MGC98819	cfap52.L			irx1.L
magi1.L	sbf2.L			ptger4.S	fgd4.L			gas2l3.L
tspan1.S	sfrp2.L			rnf43.L	znf750.S			git2.L
mgat4a.L	g0s2.L			Xelaev18038969m	gpr143.L			LOC105947450.S
tvp23b.S	cass4.L			arf6.L	sds.S			magi1.L
nin.L	slc9a6.L			inpp5a.2.L	loc108648340.L			tspan1.S
lrrc19.L	LOC108705673			myo5b.S	ncoa2.S			hdac7.L
ikbkg.L	guca1a.S			socs2.S	znf750.L			mgat4a.L
dcp1a.S	cdc42bpb.L			gopc.L	cyp27a1			tvp23b.S
vps50.L	poldip2.S			klf6.L	setd1b.L			nin.L
atg4c.L	lrig3.S			shroom4.L	gng7.L			lrrc19.L
tada3.S	smtn.S			prpf39	lamc1.L			ikbkg.L
chmp1a	mex3d.S			kif5c	prc1.L			dcp1a.S
agpat5.L	usp54.L			LOC108699634	acod1			vps50.L
cflar.L	cdh1.S			LOC108702079	cabin1.L			atg4c.L
znf407.S	slc2a2.L			efnb2.L	fam13a.L			tada3.S
scyl2.L	pcyox1.L			LOC108718667	anln.L			chmp1a
ptpn12.S	myo9a			ubp1.L	spg21.S			agpat5.L
taok3.L	znf219.L			dzank1.L	plekhn1.L			cflar.L
pde4dip	acvr1.S			c1galt1c1.L	kifc3.L			znf407.S
dpy19l4.S	cdc25b.L			prodh2.L	sgk223.L			scyl2.L
rev1.L	kdm2b.L			slc30a7.S	Xelaev18022168m			ptpn12.S
shf.S	gpr4			tmem52.L	prdm1.S			taok3.L
tgfbr1.S	gigyf2.L			hspa5.S	actb.L			pde4dip
nfatc3.S	zfand5.S			kiaa1549.S	midn.L			dpy19l4.S
tifa.L	gne.L			hes1.S				rev1.L
pigb.L	usp22 a			sgpp1.L				shf.S
lrba.L	raf1.S			enc1.L				tgfbr1.S
fbxo25.L	alcam.L			rspo2.L				nfatc3.S
hdac4.L	prom1.L			pias2.L				tifa.L
atg4c.S	trim71			slc29a3.L				pigb.L
rab21.L	gatad1.L			dusp8.S				lrba.L
Xelaev18030357m	LOC108717895			irs2.L				fbxo25.L
xplcg1a	fam46c.L			ip6k2.S				hdac4.L
LOC108695538	dusp11.L			endod1.L				atg4c.S
brpf3.S	twistnb.L			tead4.S				rab21.L
upk2	plec.S			gata3.L				Xelaev18030357m
pomgnt2.L	aplp2.L			styk1.S				xplcg1a
gpr137c.S	ddx1.L			Xelaev18037856m				LOC108695538
tdrp.L	yrdc.L			bcor.L				brpf3.S
mysm1.L	pawr.L			dlx3.S				upk2
tnrc18	cfap52.L			pygm.L				pomgnt2.L
nfatc3.L	fgd4.L			vangl1.L				gpr137c.S
fancb.L	LOC108701404			slc4a1.S				tdrp.L
c7orf60.S	znf750.S			LOC108713117				mysm1.L
trpm7.S	gpr143.L			gfpt1.L				tnrc18
c12orf66.L	tor1b.L			adam9				nfatc3.L
capn15.L	stx5.S			zmynd8.L				fancb.L
cpsf4.L	sds.S			aspg.L				c7orf60.S
edem3.L	loc108648340.L			ccno.S				akap12.L
ctage5.L	ncoa2.S			wdr12.S				trpm7.S
il6st.S	znf750.L			elmod2.L				c12orf66.L
c1orf159.L	gpat4.L			slc22a5.L				capn15.L
usp40.L	fam46c.S			poc1a.L				cpsf4.L
pla2g4f.L	cyp27a1			derl1				edem3.L
specc1	setd1b.L			post5.S				ctage5.L
pgk1.L	gng7.L			MGC68858				il6st.S
tbc1d22b.S	lamc1.L			tm9sf2.L				c1orf159.L
ubox5.S	rfwd2.L			slc7a8.L				usp40.L
hspbap1.L	dnajc10.L			ghitm.S				pla2g4f.L
asphd2.L	prc1.L			pdxdc1.L				specc1
rab33b.L	dbf4b.L			tmem213.L				pgk1.L
topors.S	spty2d1.S			prr12.S				tbc1d22b.S
rapgef2.S	acod1			vash2.S				ubox5.S
brf1.L	arfgap1.S			zbtb46.L				hspbap1.L
LOC108709626	cdca7l.L			plxnb1.L				asphd2.L
lnx1.L	srp68.S			tiam1.S				rab33b.L
LOC108714398	rpn1.S			phf21b				topors.S
tmem55a.S	capn5.S			dhcr7.L				rapgef2.S
sox3.S	racgap1.S			fam83h.S				brf1.L
wdfy3	cabin1.L			LOC108713945				LOC108709626
tulp4.L	fam13a.L			bcr.L				lnx1.L
LOC108714950	anln.L			fam3b.L				LOC108714398
kifap3.L	spg21.S			mtus1.L				tmem55a.S
phc3.L	plekhn1.L			kdm7a.S				sox3.S
LOC100301958	kifc3.L			efs.L				wdfy3
fmn2.L	tfap2a.L			LOC108695829				tulp4.L
cgnl1.L	sgk223.L			lrrn1.L				LOC108714950
b4galt2.L	Xelaev18022168m			alg2.L				kifap3.L
zc3h14.S	ppp1r15b-like.S			itpr2				phc3.L
acaca-like.S	cct6a.S			unc5b				LOC100301958
siva1.L	actb.L			ccser2.L				fmn2.L
ripk1.L	midn.L			mn1.S				cgnl1.L
epha4.L	cul4b.S			mid1ip1.S				b4galt2.L
fopnl.L				klf13.S				zc3h14.S
ano1.L				dtx4.L				acaca-like.S
ankrd27.L				ttll1.S				siva1.L
pcsk7.L				srcap.L				ripk1.L
ppp1cc.S				tmem39a.S				epha4.L
srebf2.S				klf5.L				fopnl.L
ppp1r13b.L				fblim1.S				ano1.L
herc1.L				pdgfra.L				ankrd27.L
mpp7				c5orf15.S				pcsk7.L
gpr137c.L				dedd2.L				ppp1cc.S
gab2.L				chpf.L				srebf2.S
dip2a.S				mfsd2a.S				ppp1r13b.L
LOC108714350				pik3r1.S				herc1.L
ldlr.S				sik3.L				mpp7
mpzl2.L				stard4.L				gpr137c.L
lmo7.S				esyt2.S				gab2.L
tmem39b.L				mapk6.S				dip2a.S
ehbp1				selk.S				LOC108714350
eif4e3.L				proser1.S				ldlr.S
LOC108704254				aim1l.L				mpzl2.L
cog3.L				ndufb6.L				lmo7.S
grb10.L				Xelaev18025569m				tmem39b.L
cep41.S				birc2.S				ehbp1
znf335.L				nrbp2.L				eif4e3.L
yes1.L				hao2.L				LOC108704254
armt1.L				cdk1.L				cog3.L
vcpip1.S				gata5.S				grb10.L
pfkfb3.S				tmem39a.L				cep41.S
usp32.L				tuba3c.S				znf335.L
irs2				trpm5.L				yes1.L
pomk.L				rybp.L				armt1.L
glce.L				Xelaev18033745m				vcpip1.S
rif1.S				LOC108709654				pfkfb3.S
sil1.L				tead1.S				usp32.L
gbf1.L				slc9a2				prdm14.S
clec16a.L				tmed9.L				irs2
dhx40.S				fchsd2				pomk.L
golga2				bicd1				glce.L
ttc37.L				lrrn1.S				rif1.S
socs5.S				dnajb12.L				sil1.L
prdm9.L				top2b.L				gbf1.L
ei24.S				irf2bpl.S				clec16a.L
LOC108701852				gdi1.S				dhx40.S
lamp1.L				cebpa.L				golga2
prss16.L				prelid3b.S				ttc37.L
r3hdm4.S				ccser2.S				socs5.S
cbwd1.1.L				khdc4				prdm9.L
atp10b				uspl1-like.L				ei24.S
slc15a4.S				creb3l4.S				LOC108701852
dcp1a				arpc3.L				lamp1.L
nedd4l.S				acsl1.S				prss16.L
slc6a14.2.L				tm9sf3.S				r3hdm4.S
c12orf66.S				krt8.L				cbwd1.1.L
kat2b				npnt.S				atp10b
stk11.L				arglu1.L				slc15a4.S
ube3c.L				p4hb.L				dcp1a
LOC108719558				dot1l.L				dnmbp.L
MGC115657				gpatch8.S				nedd4l.S
LOC108707483				Xelaev18006613m				slc6a14.2.L
sorl1.L				lsm4.L				c12orf66.S
itpkc.L				Xelaev18007569m				kat2b
atl2-like.S				Xelaev18011667m				stk11.L
gpr155.S				LOC108701168				ube3c.L
chn1.S				ift46.L				LOC108719558
irak1.L				Xelaev18040914m				MGC115657
anapc7.L				h1fx.S				LOC108707483
oxct1.L				ubap2.S				sorl1.L
tube1.L				LOC108713946				itpkc.L
pdzd2.S				spred2.L				atl2-like.S
tnfsf11.S				stambp.L				gpr155.S
exd2.L				gmps.L				chn1.S
znf234.L				grhl1.L				irak1.L
crtc3.S				farp2.L				anapc7.L
azi2				Xelaev18038622m				oxct1.L
cep164.L				LOC108715921				tube1.L
csnk1g3.L				b4galt3l2.L				pdzd2.S
klhl7.S				vasn.S				tnfsf11.S
inpp4a.L				MGC52827				exd2.L
sall3.S				rdh10.L				znf234.L
tuba4.L				tfcp2l1.S				crtc3.S
dgke.S				itpkb				azi2
sbf2.S				polr2h.L				cep164.L
snx10.L				rnf44.S				csnk1g3.L
phf19.S				kdm5b.S				klhl7.S
sbk1.L				iqsec3.S				inpp4a.L
rev1.S				gmppb.L				sall3.S
sorbs1.L				scaf4.L				tuba4.L
b3gnt4.L				ssr2.L				dgke.S
csk.L				cfap100.L				sbf2.S
atxn1.S				LOC108699910				snx10.L
bpgm.S				slc35a2.L				phf19.S
tmbim1.S				kdm6a.S				sbk1.L
ank3.S				srcap.S				rev1.S
hgsnat.L				traf3ip1.L				sorbs1.L
dnajc14.L				sec61a1.S				b3gnt4.L
mfsd14a				kpna4.S				csk.L
larp1b.S				top2b.S				atxn1.S
inpp5b.L				ano9.L				bpgm.S
chst10.L				syn2.S				tmbim1.S
chd6.S				ell.L				ank3.S
pign.S				slc16a6.L				hgsnat.L
atp8a1.L				loc734020.L				dnajc14.L
sepsecs.L				slc25a25.L				mfsd14a
socs3-like.1.L				emg1.L				larp1b.S
ywhag.L				intu.S				inpp5b.L
grm8.L				nckap5l.S				chst10.L
mast2.S				mllt10.L				chd6.S
dmtf1.S				march7.S				pign.S
csk.S				ptbp1.S				atp8a1.L
loc733556.L				ubap2.L				sepsecs.L
Xelaev18045296m				hsf2.L				socs3-like.1.L
klhdc10				abca8.L				ywhag.L
LOC108700142				LOC108712218				grm8.L
herc3.L				tprn.L				mast2.S
atr.L				tstd1.S				dmtf1.S
sox21.S				c12orf45.S				csk.S
gmnn.S				gfpt1.S				loc733556.L
klhl22.L				herpud1.S				Xelaev18045296m
gpm6b.S				vangl1.S				klhdc10
tex2.2.S				flvcr1.S				LOC108700142
foxp1.L				fam53c.L				herc3.L
sipa1l1.L				utp15.L				atr.L
mgc69520.S				ccdc112.L				sox21.S
zfyve28-like.1.S				loc100497729.L				gmnn.S
LOC108699095				crebzf.S				klhl22.L
snx25.L				topbp1.L				gpm6b.S
kcp.L				stk38l.L				tex2.2.S
bcl9l.S				hap1.L				foxp1.L
atp6v0a1.S				sephs1.L				sipa1l1.L
tbc1d4.S				gmeb2.L				mgc69520.S
spag9				gss.L				zfyve28-like.1.S
loc734029.L				ticrr.L				LOC108699095
haus3.L				znf687.S				snx25.L
sh3pxd2b.S				cry1				kcp.L
fcho1.S				dynll1.L				bcl9l.S
pex1.L				LOC108719509				atp6v0a1.S
tubgcp3.S				trim68				tbc1d4.S
sox8.S				rbm24.L				spag9
cnst.S				kndc1.L				loc734029.L
b3gnt5.L				stk38l.S				haus3.L
atl2.L				stard3.L				sh3pxd2b.S
LOC100127794.L				ist1				fcho1.S
thap7.S				Xelaev18034047m				pex1.L
mast2				sdf4.S				tubgcp3.S
LOC108699896				xicl				sox8.S
mov10l1.L				wif1.L				cnst.S
tgif2.L				arhgef1.S				b3gnt5.L
naa60				znf148.S				atl2.L
arl5c.L				armc5.L				LOC100127794.L
ssh2				uqcrq.S				thap7.S
fam109b.L				bicd1.L				mast2
snx13.S				dlx1				LOC108699896
nfxl1.L				leng8.S				mov10l1.L
stambpl1.S				sphk2.S				tgif2.L
pms2.L				tubgcp6.L				naa60
MGC115291				eif4a2.L				arl5c.L
Xelaev18031390m				kitlg.L				ssh2
sacs				stim1.S				fam109b.L
atp13a4.S				srp19.S				snx13.S
adcy9.S				lsm4.S				nfxl1.L
klhdc10.L				LOC108705093				stambpl1.S
zfp36l2.2.L				ahdc1.L				pms2.L
mcoln2.L				tmem178b				MGC115291
gpr4.S				krt8.S				Xelaev18031390m
kiaa0513.S				rbm25.L				sacs
wasll.L				dlx6.L				atp13a4.S
LOC108711414				clk2.L				adcy9.S
srgap2.L				rbm45.L				klhdc10.L
tnfaip8l3.S				yipf6.L				zfp36l2.2.L
dnajc13.L				klhl2.S				mcoln2.L
bri3.S				atp1b1.S				gpr4.S
trappc8.L				kmt2a.S				kiaa0513.S
tgif2.S				rrn3.L				wasll.L
lrrc16a.L				rpl35a.L				LOC108711414
dctn4.L				fzd8.S				srgap2.L
prkch.L				bcar1.L				tnfaip8l3.S
fam73a.L				phip.L				dnajc13.L
mast4.S				fnbp4.L				bri3.S
pcsk5				myc.S				trappc8.L
taf4b.S				fam179b.L				tgif2.S
ubtd2.S				ppp2r2d				lrrc16a.L
borcs6.S				ube2n.S				dctn4.L
prrg1.L				arglu1.S				prkch.L
dock9				rpl26.S				fam73a.L
dock4.L				arhgap21.S				mast4.S
zyg11b.S				myl6.S				pcsk5
abhd14a.S				nr2f6				taf4b.S
fez2.S				Xelaev18025954m				ubtd2.S
pcgf2.L				ldb1.L				borcs6.S
blcap.S				nptx2.S				prrg1.L
dgkq.L				slc4a11.L				dock9
znf567				gse1.S				dock4.L
keap1.L				xpo4.S				zyg11b.S
plekhg3				flii.L				abhd14a.S
dusp7.L				pan2.L				fez2.S
dapk1.L				rpl8.L				pcgf2.L
itprip.L				med13l.L				blcap.S
arhgap26.L				med4.L				dgkq.L
mtmr10.S				ptmap12.S				znf567
LOC108709196				esyt3.L				keap1.L
tnfsf11.L				cep135.L				plekhg3
rfwd2.S				pdia6.S				dusp7.L
atp8a1.S				dcaf8.S				dapk1.L
ssh1.L				r3hdm2.L				itprip.L
tubgcp5				prelid1.S				arhgap26.L
ankrd54.S				id4.S				mtmr10.S
ska2.L				cerk				LOC108709196
ttbk2.S				march6.L				tnfsf11.L
foxp1.S				nek2.S				rfwd2.S
arhgef18.S				znf462.L				atp8a1.S
irf6.L				clk3.S				ssh1.L
ccdc50.S				snx12.L				tubgcp5
cebpd.S				rps12.L				ankrd54.S
sox13.S				cnot1.S				ska2.L
LOC108703778				calr.L				ttbk2.S
znf521.S				Xelaev18000128m				foxp1.S
dapl1.S				aurka.L				arhgef18.S
akap9.S				katnal2.L				irf6.L
tradd.L				sirt7.L				ccdc50.S
MGC115510				LOC108701666				cebpd.S
dsc3.S				skida1.L				tpbg.L
zcchc11.S				fam3a.L				sox13.S
fry.L				rpf1.S				LOC108703778
syne2				ncstn.S				znf521.S
ccdc158				calr				dapl1.S
fignl1.L				kiaa0907.L				akap9.S
LOC108716797				cpd.L				tradd.L
arhgap18.L				trappc13.S				MGC115510
hectd4.S				mpp5.L				dsc3.S
cntln.L				mars2				zcchc11.S
LOC108706119				pou5f3.1.L				fry.L
rnf41.L				rpl26.L				syne2
plekhm3.L				eif4e.L				ccdc158
cttnbp2.L				smc2.S				fignl1.L
pxylp1.S				cln3.L				LOC108716797
ankrd13c.L				lrrc47.L				arhgap18.L
hpca.S				taf3.L				plekhg1.L
mgat4b.L				prdx5.S				hectd4.S
abhd12.L				larp1.L				cntln.L
pou5f3.3.S				wdr43.L				LOC108706119
tmem63a.S				leng8.L				rnf41.L
dnajb14.L				Xetrov90029311m.S				plekhm3.L
ccdc53.L				shfm1.S				cttnbp2.L
fam46b.S				rps3a.L				amotl2.S
ep400.L				erf.S				pxylp1.S
spg11.L				melk.L				ankrd13c.L
Xelaev18008189m				bcorl1.S				hpca.S
filip1.S				hps3.L				mgat4b.L
fbxl4.S				brd1.S				abhd12.L
lhfpl2.L				shb.L				pou5f3.3.S
pik3ca.L				anln-like.1.L				tmem63a.S
akap9				wdr13.L				dnajb14.L
dtna.S				cfap77				ccdc53.L
slc20a1.S				acer3.L				fam46b.S
srpk2.S				rpl27a.S				ep400.L
LOC108698338				atp1a1.S				spg11.L
prickle4.S				rab11fip3.S				Xelaev18008189m
dock9.L				chkb.S				filip1.S
cep170.S				MGC68706				fbxl4.S
fitm2.L				sik3.S				lhfpl2.L
optn.S				kiaa0232.L				pik3ca.L
patl2.L				rbm39.L				akap9
tmcc2.S				rpl27a.L				dtna.S
cebpg.L				capn1.L				slc20a1.S
znf521				Xelaev18006569m				srpk2.S
ins				lrig2.L				LOC108698338
xpo6.L				LOC108711813				prickle4.S
mapkapk5.S				rps6.L				dock9.L
sh2d3c.L				mau2.S				cep170.S
acod1.S				Xetrov90014299m.L				fitm2.L
traf4.S				cdc34.S				optn.S
c1orf116.L				strap.L				patl2.L
cgnl1.S				acbd3.S				tmcc2.S
wasll.S				rpl34.S				cebpg.L
loc100494211.S				itga5.L				znf521
slc41a1				ubap2l				ins
myod1.L				ranbp2.S				xpo6.L
atp12a				lrrcc1.L				mapkapk5.S
ubl7.L				ahdc1.S				sh2d3c.L
admp2.L				cpeb2-like.S				acod1.S
cry4.L				rbm14.L				traf4.S
Xelaev18023494m				dph7.L				c1orf116.L
dop1a				LOC108706721				cgnl1.S
cyp27b1.L				cdc42ep4.S				wasll.S
kiaa0226l.S				rps2				loc100494211.S
dennd2c.L				thoc6.L				slc41a1
gtf2ird1.S				znf740.S				myod1.L
mb21d2.S				dynll1.S				atp12a
gli2.S				tmem52.S				ubl7.L
MGC81187				kif11.S				admp2.L
fam102b.L				nup188.S				cry4.L
armc2.L				spsb4.L				Xelaev18023494m
poc5.L				rpl19.L				dop1a
dennd4b.L				loc728026.L				cyp27b1.L
cyp1a1.S				kansl3.L				kiaa0226l.S
sox21.L				adipor2.S				dennd2c.L
pgm2l1				med23.L				gtf2ird1.S
zyg11b.L				hdlbp.L				mb21d2.S
tnip2.S				Xelaev18009838m				zic2.L
dapk1.S				c1orf198				gli2.S
filip1.L				prss8				MGC81187
tmem169.L				tdg.S				fam102b.L
ptpru.S				LOC108711131				armc2.L
cdc6.S				rpl17-c18orf32				poc5.L
znf41.S				ifrd1.S				dennd4b.L
spry1.S				LOC108715136				cyp1a1.S
socs4.L				mpv17.L				sox21.L
slc25a16.L				bcorl1.L				pgm2l1
kcnj5.L				anxa4.L				zyg11b.L
stc1.L				LOC108715172				tnip2.S
tspoap1.L				dgkd-like.S				dapk1.S
or52m1.L				efna3.L				filip1.L
pigc.L				Xelaev18027269m				tmem169.L
ldlr.L				ptgfrn.S				ptpru.S
xpo6.S				fam107a.S				cdc6.S
rab31.L				cers2.L				znf41.S
pacs2.L				rps2.L				spry1.S
ccdc3.L				fam193a.L				socs4.L
cdca7				sptan1.L				slc25a16.L
scai				LOC108706589				kcnj5.L
arhgap11a.2.L				kmt2e.L				stc1.L
chst8.S				arhgap5.L				tspoap1.L
usp46.L				rpl7.L				or52m1.L
znf577.S				psmb3.L				pigc.L
kank1.L				cops5.S				ldlr.L
dand5.L				parp1.L				xpo6.S
gpr65.S				rps3a.S				rab31.L
vps13d.L				rnf41.S				pacs2.L
grin2b.S				arl4c.S				ccdc3.L
ccnb1.S				rpf1.L				cdca7
zic1.L				luc7l2.S				scai
tmem158.S				snrnp200.L				arhgap11a.2.L
slc20a2.L				paxip1.S				chst8.S
stx11.S				lmo4.2.L				LOC108701422
btg4.S				gps2.S				usp46.L
nlk.S				pik3r1.L				znf577.S
ccdc102a.L				braf.L				kank1.L
nkd1.S				rbm12.L				dand5.L
mcf2l				tomm70a.S				gpr65.S
zbtb16.S				c21orf59.S				vps13d.L
gpr22l.S				setd1a.L				grin2b.S
Xelaev18037842m				psma6.S				ccnb1.S
has2.L				ripk4.L				zic1.L
sox17b.1.S				rsph9.L				tmem158.S
cbarp.L				tiprl.S				slc20a2.L
cdc42ep2				ccdc61.L				stx11.S
hes7.1.L				xab2.L				btg4.S
bcar3.L				enc1.2.L				nlk.S
ccndx.S				fnbp1l				ccdc102a.L
tgds.S				mrpl27.L				nkd1.S
arhgap11a.2.S				rpl21.L				mcf2l
marchf2				MGC81028				zbtb16.S
tdgf1.1.L				kif18a.L				gpr22l.S
apold1.L				ncoa6.L				Xelaev18037842m
lhx3.S				rnf111-b				has2.L
foxi2.L				smg1.L				sox17b.1.S
kiaa0586.L				tmed1				cbarp.L
cxorf21.S				znf593.L				cdc42ep2
dand5.S				dip2a				hes7.1.L
mix1.S				ttf2.S				bcar3.L
rgl2				taok2.L				ccndx.S
zeb2.L				bcor.S				tgds.S
hes3.S				znf462.S				arhgap11a.2.S
niban2				ssr1.S				marchf2
znf534.L				zbtb17.S				tdgf1.1.L
hes8.L				leprotl1.L				apold1.L
itln1.L				ptbp1.L				lhx3.S
hes8.S				znf318.S				foxi2.L
ppl.S				rpl37.S				kiaa0586.L
hes5.3.S				b3gnt2.L				cxorf21.S
dmrt2.S				fam64a.L				dand5.S
atp13a-like.S				xetrov90011961m.S				mix1.S
foxj1.2.L				yap1.S				rgl2
mcidas				iqsec2.L				zic3.L
foxj1.2.S				Xelaev18012294m				zeb2.L
kit.S				hspbp1.L				hes3.S
prox1.S				rbl1.L
klf4.S				sfpq.L
isl1.L				cpsf1
hes3.3.L				rps6.S
galnt12.L				cxadr.L
Xelaev18002015m				nat9.S
atp12a.L				hipk2.L
anos1.L				top1.1.L
loc100489456.L				rpl4.S
loc100145533.S				LOC108708226
tbx20.L				atp5o.L
fam3d.S				gab1.S
vill.S				esco2.S
myb.L				hnrnpl.L
gata6.S				hp1bp3.L
tbx3.L				lbh.L
bmp7.1.S				zfp36l1
dipk1c.S				fam193a.S
tril.L				rps13.L
eya1.L				rps3.S
gdpd1.L				prpf39.1.S
Xelaev18045499m				arrdc3.L
hspg2.L				smad6.S
slc45a3.L				ubap2l.L
slc38a2.L				hspa8.L
mcidas.L				ect2.L
tbx3.S				mesdc1.S
vill.L				atp5a1.S
LOC100486385.L				stau1.S
tuba1a.S				capzb.L
ankrd22.S				itga3.S
foxn4.S				mtf2.S
rab15.L				jagn1.L
krt16.L				rpl32
aim1.S				qser1.L
vgll1.L				rpl37a.L
dmrta2.S				luc7l3.L
tnni2.L				slu7.L
parm1				hspa8.S
slc26a4l.L				nudt9.L
ag1.S				ndrg4.S
foxj1.S				cfap53.L
rab3d.L				fscb
spns1				msi1.L
capn8.2.L				srsf11-like.S
nefm.L				lamc1.S
gadd45b.L				qser1.S
arid3a				prpf39.1.L
slc9a3r2.L				LOC108708564
prrt3-like.L				rps10
slc17a9.S				wdr92.L
LOC108710463				cnot4.L
hes9-1.S				rbm45.S
rasal1.L				rpl31.L
znf827.L				ncapd2.S
Xelaev18039917m				bcl9.S
myb.S				cramp1.S
vtcn1.L				rpl7a.S
pdgfa.S				rps23.L
xk81a1.L				wwc2.S
slc1a1.L				glyr1.S
pcdh8.2.L				spen
gby.L				zswim5.S
Xelaev18000619m				srrt.L
dtx1.L				rps4
fzd6.L				ppp1cb.L
s100a2				peli1.L
bmper.L				mcrs1.S
slc3a2				Xelaev18009254m
tbx2.L				rbm4b.S
ecm1.S				esf1.L
LOC108719358				MGC83421
sidt1.L				tubb2b.L
c1orf127.L				cecr2.L
LOC108699294				fkbp1a.L
Xelaev18037313m				ctps1.S
b4galnt3.S				ap1m2.S
hsd3b1.L				LOC108695696
sox5				ddi2.S
hspa13.L				LOC108709832
cfap161.L				rps11
onecut1.2.S				ylpm1.L
hs6st1.S				bcl9.L
esr10.S				rps9
clcnkb				cct7.S
tll1.S				pkn2.S
ahnak.S				rbm4b.L
abtb2.L				snrnp200.S
gnb3.S				mkrn2.L
Xelaev18035430m				sec61g.L
LOC108714664				luc7l2
Xelaev18003738m				ubb.L
tbx2.S				eef1a1o.L
gfra1				mlec.S
lgalsl.L				rpl7
foxj1.L				rpl7a.L
hes5.1.S				rpl8.S
lsp1.L				prc1.2.S
syt16.L				rpl6.L
cdh2.S				pcnp.L
bmerb1				pcf11.S
ttc39a.L				rpl32.L
fzd6.S				cbs.S
rab25.L				paxip1.L
sp5.L				tmed8.S
mab21l3.S				sumo2.L
slc30a10.S				LOC108698564
pou2f3.L				rpl3.L
loc100216141.L				hif-1a
rarres1.L				rpl10a.S
znf827.S				dido1.L
rergl				psmc6-b
kcnc1				upf1.L
nbeal2.L				hsp90ab1.S
krt23.L				psmc5.L
rgl1				rps5.L
tbc1d31.L				rpl36a.S
cdc42bpa.L				rpl10.L
LOC108711831				LOC397846
ppl.L				hdgf.S
pvrl1-like.2.S				rps20.L
myo1e				eef2.1.L
plekha7.L				eif3e.L
Xelaev18030689m				srsf2.S
lmo4.1.L				serinc5.S
gata4.S				rpl38.S
rorb.L				rplp2.L
Xelaev18032309m				son
LOC108700979				psma7.S
tll1-like.1.L				rps27a.L
xfrp				sf3b2.S
syt13				srsf4.L
cul5.S				eif4b.S
wdr66.L
fbxo16.L
lmo4.1.S
fam195a.L
hes5.1.L
LOC108714578
rsph1.L
lrrc36.L
esrra.L
golm1.L
comt.2.S
Xelaev18017809m
bcat1.L
esrrg.S
gne.S
tbc1d24.2.S
lef1.L
degs3.S
LOC108704696
dedd2.S
vwf
efnb3
LOC108701745
b4galnt3.L
rab6b.L
nr6a1.S
krt5.7.L
sgsm3.S
lrp4.S
slc44a3.L
crocc2
zbtb46.S
gdpgp1.S
specc1l
vsig8.L
pmepa1.S
ablim1.S
emp2.L
samd15.L
cdc42bpa.S
efhc1.L
atp6v0a4.L
ephb2.S
slc22a4.L
bmp7.1.L
dgkk.L
LOC108709394
c6orf132
hspa5
xk.L
trim29.L
slc9a3r2.S
slc35c1.L
capns1.L
nek2.L
kit.L
dlx2.L
gpatch8.L
ccdc63.S
Xelaev18005230m
arhgap23.L
dnajb9.L
lgalsl.S
dgkd-like.L
ubald2.L
fzd10.S
lzts2.S
pmepa1.L
ddx54
blvra.L
actn1.L
dlx3.L
eif4g1.L
LOC108697430
Xelaev18043506m
chsy1.S
fzd3.L
rnf208.L
sytl2
lrmp.L
pprc1
rassf10.L
sytl4.S
eya1.S
MGC81163
pkp3.S
ctbs.S
atg16l2
ccno.L
slc17a9.L
asl.L
rbbp8nl.S
galnt10.L
tcp11l2.L
trib1.L
ccdc151.L
sept5.L
tead4.L
chd2.L
znf644.L
LOC108704672
LOC108710484
LOC108708333
esrp1.L
anxa2.S
pnck.S
rbm47.L
esrp1.S
foxn4.L
smug1.L
cyp2ac1
prickle2.S
chpf.S
adgrl2.S
amotl1.L
znrf3.L
cxcl12.L
armc4.S
dgka.L
mfsd6l.L
MGC98819
ptger4.S
rnf43.L
Xelaev18038969m
arf6.L
inpp5a.2.L
myo5b.S
socs2.S
gopc.L
klf6.L
shroom4.L
prpf39
kif5c
LOC108699634
LOC108702079
efnb2.L
LOC108718667
ubp1.L
dzank1.L
c1galt1c1.L
prodh2.L
slc30a7.S
tmem52.L
hspa5.S
kiaa1549.S
hes1.S
sgpp1.L
enc1.L
rspo2.L
pias2.L
slc29a3.L
dusp8.S
irs2.L
ip6k2.S
endod1.L
tead4.S
gata3.L
styk1.S
Xelaev18037856m
bcor.L
dlx3.S
pygm.L
vangl1.L
slc4a1.S
LOC108713117
gfpt1.L
adam9
zmynd8.L
aspg.L
ccno.S
wdr12.S
elmod2.L
slc22a5.L
poc1a.L
derl1
post5.S
MGC68858
tm9sf2.L
slc7a8.L
ghitm.S
pdxdc1.L
tmem213.L
prr12.S
vash2.S
zbtb46.L
plxnb1.L
tiam1.S
phf21b
dhcr7.L
fam83h.S
LOC108713945
bcr.L
fam3b.L
mtus1.L
kdm7a.S
efs.L
LOC108695829
lrrn1.L
alg2.L
itpr2
unc5b
ccser2.L
mn1.S
mid1ip1.S
klf13.S
dtx4.L
ttll1.S
srcap.L
tmem39a.S
klf5.L
fblim1.S
pdgfra.L
c5orf15.S
dedd2.L
chpf.L
mfsd2a.S
pik3r1.S
sik3.L
stard4.L
esyt2.S
mapk6.S
selk.S
proser1.S
aim1l.L
ndufb6.L
Xelaev18025569m
birc2.S
nrbp2.L
hao2.L
cdk1.L
gata5.S
tmem39a.L
tuba3c.S
trpm5.L
rybp.L
Xelaev18033745m
LOC108709654
tead1.S
slc9a2
tmed9.L
fchsd2
bicd1
lrrn1.S
dnajb12.L
top2b.L
irf2bpl.S
gdi1.S
cebpa.L
prelid3b.S
ccser2.S
khdc4
uspl1-like.L
creb3l4.S
arpc3.L
acsl1.S
tm9sf3.S
krt8.L
npnt.S
arglu1.L
p4hb.L
dot1l.L
gpatch8.S
Xelaev18006613m
lsm4.L
Xelaev18007569m
Xelaev18011667m
LOC108701168
ift46.L
Xelaev18040914m
h1fx.S
ubap2.S
LOC108713946
spred2.L
stambp.L
gmps.L
grhl1.L
farp2.L
Xelaev18038622m
LOC108715921
b4galt3l2.L
vasn.S
MGC52827
rdh10.L
tfcp2l1.S
itpkb
polr2h.L
rnf44.S
kdm5b.S
iqsec3.S
gmppb.L
scaf4.L
ssr2.L
cfap100.L
LOC108699910
slc35a2.L
kdm6a.S
srcap.S
traf3ip1.L
sec61a1.S
kpna4.S
top2b.S
ano9.L
syn2.S
ell.L
slc16a6.L
loc734020.L
slc25a25.L
emg1.L
intu.S
nckap5l.S
mllt10.L
march7.S
ptbp1.S
ubap2.L
hsf2.L
abca8.L
LOC108712218
tprn.L
tstd1.S
c12orf45.S
gfpt1.S
herpud1.S
vangl1.S
flvcr1.S
fam53c.L
utp15.L
ccdc112.L
loc100497729.L
crebzf.S
topbp1.L
stk38l.L
hap1.L
sephs1.L
gmeb2.L
gss.L
ticrr.L
znf687.S
cry1
dynll1.L
LOC108719509
trim68
rbm24.L
kndc1.L
stk38l.S
stard3.L
ist1
Xelaev18034047m
sdf4.S
xicl
wif1.L
arhgef1.S
znf148.S
armc5.L
uqcrq.S
bicd1.L
dlx1
leng8.S
sphk2.S
tubgcp6.L
eif4a2.L
kitlg.L
stim1.S
srp19.S
lsm4.S
LOC108705093
ahdc1.L
tmem178b
krt8.S
rbm25.L
dlx6.L
clk2.L
rbm45.L
yipf6.L
klhl2.S
atp1b1.S
kmt2a.S
rrn3.L
rpl35a.L
fzd8.S
bcar1.L
phip.L
fnbp4.L
myc.S
fam179b.L
ppp2r2d
ube2n.S
arglu1.S
rpl26.S
arhgap21.S
myl6.S
nr2f6
Xelaev18025954m
ldb1.L
nptx2.S
slc4a11.L
gse1.S
xpo4.S
flii.L
pan2.L
rpl8.L
med13l.L
med4.L
ptmap12.S
esyt3.L
cep135.L
pdia6.S
dcaf8.S
r3hdm2.L
prelid1.S
id4.S
cerk
march6.L
nek2.S
znf462.L
clk3.S
snx12.L
rps12.L
cnot1.S
calr.L
Xelaev18000128m
aurka.L
katnal2.L
sirt7.L
LOC108701666
skida1.L
fam3a.L
rpf1.S
ncstn.S
calr
kiaa0907.L
cpd.L
trappc13.S
mpp5.L
mars2
pou5f3.1.L
rpl26.L
eif4e.L
smc2.S
cln3.L
lrrc47.L
taf3.L
prdx5.S
larp1.L
wdr43.L
leng8.L
Xetrov90029311m.S
shfm1.S
rps3a.L
erf.S
melk.L
bcorl1.S
hps3.L
brd1.S
shb.L
anln-like.1.L
wdr13.L
cfap77
acer3.L
rpl27a.S
atp1a1.S
rab11fip3.S
chkb.S
MGC68706
sik3.S
kiaa0232.L
rbm39.L
rpl27a.L
capn1.L
Xelaev18006569m
lrig2.L
LOC108711813
rps6.L
mau2.S
Xetrov90014299m.L
cdc34.S
strap.L
acbd3.S
rpl34.S
itga5.L
ubap2l
ranbp2.S
lrrcc1.L
ahdc1.S
cpeb2-like.S
rbm14.L
dph7.L
LOC108706721
cdc42ep4.S
rps2
thoc6.L
znf740.S
dynll1.S
tmem52.S
kif11.S
nup188.S
spsb4.L
rpl19.L
loc728026.L
kansl3.L
adipor2.S
med23.L
hdlbp.L
Xelaev18009838m
c1orf198
prss8
tdg.S
LOC108711131
rpl17-c18orf32
ifrd1.S
LOC108715136
mpv17.L
bcorl1.L
anxa4.L
LOC108715172
dgkd-like.S
efna3.L
Xelaev18027269m
ptgfrn.S
fam107a.S
cers2.L
rps2.L
fam193a.L
sptan1.L
LOC108706589
kmt2e.L
arhgap5.L
rpl7.L
psmb3.L
cops5.S
parp1.L
rps3a.S
rnf41.S
arl4c.S
rpf1.L
luc7l2.S
snrnp200.L
paxip1.S
lmo4.2.L
gps2.S
pik3r1.L
braf.L
rbm12.L
tomm70a.S
c21orf59.S
setd1a.L
psma6.S
ripk4.L
rsph9.L
tiprl.S
ccdc61.L
xab2.L
enc1.2.L
fnbp1l
mrpl27.L
rpl21.L
MGC81028
kif18a.L
ncoa6.L
rnf111-b
smg1.L
tmed1
znf593.L
dip2a
ttf2.S
taok2.L
bcor.S
znf462.S
ssr1.S
zbtb17.S
leprotl1.L
ptbp1.L
znf318.S
rpl37.S
b3gnt2.L
fam64a.L
xetrov90011961m.S
yap1.S
iqsec2.L
Xelaev18012294m
hspbp1.L
rbl1.L
sfpq.L
cpsf1
rps6.S
cxadr.L
nat9.S
hipk2.L
top1.1.L
rpl4.S
LOC108708226
atp5o.L
gab1.S
esco2.S
hnrnpl.L
hp1bp3.L
lbh.L
zfp36l1
fam193a.S
rps13.L
rps3.S
prpf39.1.S
arrdc3.L
smad6.S
ubap2l.L
hspa8.L
ect2.L
mesdc1.S
atp5a1.S
stau1.S
capzb.L
itga3.S
mtf2.S
jagn1.L
rpl32
qser1.L
rpl37a.L
luc7l3.L
slu7.L
hspa8.S
nudt9.L
ndrg4.S
cfap53.L
fscb
msi1.L
srsf11-like.S
lamc1.S
qser1.S
prpf39.1.L
LOC108708564
rps10
wdr92.L
cnot4.L
rbm45.S
rpl31.L
ncapd2.S
bcl9.S
cramp1.S
rpl7a.S
rps23.L
wwc2.S
glyr1.S
spen
zswim5.S
srrt.L
rps4
ppp1cb.L
peli1.L
mcrs1.S
Xelaev18009254m
rbm4b.S
esf1.L
MGC83421
tubb2b.L
cecr2.L
fkbp1a.L
ctps1.S
ap1m2.S
LOC108695696
ddi2.S
LOC108709832
rps11
ylpm1.L
bcl9.L
rps9
cct7.S
pkn2.S
rbm4b.L
snrnp200.S
mkrn2.L
sec61g.L
luc7l2
ubb.L
eef1a1o.L
mlec.S
rpl7
rpl7a.L
rpl8.S
prc1.2.S
rpl6.L
pcnp.L
pcf11.S
rpl32.L
cbs.S
paxip1.L
tmed8.S
sumo2.L
LOC108698564
rpl3.L
hif-1a
rpl10a.S
dido1.L
psmc6-b
upf1.L
hsp90ab1.S
psmc5.L
rps5.L
rpl36a.S
rpl10.L
LOC397846
hdgf.S
rps20.L
eef2.1.L
eif3e.L
srsf2.S
serinc5.S
rpl38.S
rplp2.L
son
psma7.S
rps27a.L
sf3b2.S
srsf4.L
eif4b.S

## Sheet: St12-13
Temporal DESeq Epi Neur Venn Diagram Gene Lists corresponding with Figure 3B
Total				Increase				Decrease
Epi Only	Neur Only	Overlap		Epi Only	Neur Only	Overlap		Epi Only	Neur Only	Overlap
eml4.S	galnt16.L	sp7.L		loc100489834.L	galnt16.L	sp7.L		eml4.S	cracr2b.L	n/a
ccnb2.L	ncam1.L	agr2.L		lrrc18.L	ncam1.L	agr2.L		ccnb2.L
cdv3.S	nr6a1.L	rab3d.L		lrrc31	nr6a1.L	rab3d.L		cdv3.S
shcbp1.S	eya1.L	fucolectin.S		kiaa1549l.S	eya1.L	fucolectin.S		shcbp1.S
rcl1.L	ventx1.2.L	c6orf132		LOC100488736-like.1.1	ventx1.2.L	c6orf132		rcl1.L
dctpp1.L	lrat.L	syt8.L		stmnd1.S	lrat.L	syt8.L		dctpp1.L
nomo3.S	lhx2.S	znf185.L		bc051019	lhx2.S	znf185.L		nomo3.S
frg1.L	Xelaev18017809m	stard10.S		ai661453	Xelaev18017809m	stard10.S		frg1.L
birc5.2.S	krt12.S	arhgef3.2.L		fam81b.S	krt12.S	arhgef3.2.L		birc5.2.S
cdk9.L	celf3.L	sgsm3.S		LOC101733219.S	celf3.L	sgsm3.S		cdk9.L
plcd1.L	crabp2.L	nkain4.S		LOC100488736-like.2.1	crabp2.L	nkain4.S		plcd1.L
ccna2.S	mmel1.L	gnb3.S		LOC108711774	mmel1.L	gnb3.S		ccna2.S
smarcd1.S	ventx2.2.L	wfdc2.L		spata18-like.L	ventx2.2.L	wfdc2.L		smarcd1.S
nsmce4a.L	ventx2.1.L	pvrl1-like.2.S		tmc5.L	ventx2.1.L	pvrl1-like.2.S		nsmce4a.L
bmp1.S	acsbg2.S	scnn1a.S		LOC108696147	acsbg2.S	scnn1a.S		bmp1.S
ccne1.L	nxpe2.L			kiaa1324.L	nxpe2.L			ccne1.L
wdr45b.S	mapk6.L			hmx3.L	mapk6.L			wdr45b.S
pfkfb4.L	trim29.S			ikzf2.S	trim29.S			pfkfb4.L
cops2.L	ror2.S			colca2.L	ror2.S			cops2.L
kdsr.L	gli3.S			hgf.S	gli3.S			kdsr.L
por.L	shroom3			ccdc17.L	shroom3			por.L
st6galnac2.L	ventx2.1.S			LOC108708418	ventx2.1.S			st6galnac2.L
psme4.L	gata2.L			pou1f1.L	gata2.L			psme4.L
rab5a.L	id3.S			epn3.S	id3.S			rab5a.L
hexb	nhs			sstr5.S	nhs			hexb
ppp6r1.L	arhgap36.L			casz1.L	arhgap36.L			ppp6r1.L
galnt7.S	adam33.L			ppp1r32.L	adam33.L			galnt7.S
cdt1.L	pax3.L			LOC100127337	pax3.L			cdt1.L
vps13b.L	id3.L			ttc24.L	id3.L			vps13b.L
MGC83206	ulk1.S			neurl1.L	ulk1.S			MGC83206
tjap1.S	arhgap39			loc100127564.L	arhgap39			tjap1.S
cul3.S	tmem138.L			capsl.S	tmem138.L			cul3.S
os9.S	ccng1.S			cdhr4.L	ccng1.S			os9.S
rcc1.L	elf1.S			gnaz.L	elf1.S			rcc1.L
zcchc8.L	trpv5.L			prr29.L	trpv5.L			zcchc8.L
emc3.L	rreb1.S			t.L	rreb1.S			emc3.L
ddrgk1.L	cracr2b.L			myo15b.L				ddrgk1.L
cops2.S				tacr1.S				cops2.S
nkap.L				b3gnt3.L				nkap.L
sde2.S				LOC108710713				sde2.S
cdh3.S				morn3.S				cdh3.S
atp11b.L				efhc2.S				atp11b.L
ncdn.S				LOC108708075				ncdn.S
col4a3bp.S				lrrc73.S				col4a3bp.S
fyb1				scn5a				fyb1
hsf2.2.L				pip5k1b.S				hsf2.2.L
stk17a.S				msrb2.L				stk17a.S
cpsf2.L				cracr2a.L				cpsf2.L
dapk3.S				ccdc78.S				dapk3.S
eif2b5.S				gpr156.S				eif2b5.S
mn1.L				MGC75872.L				mn1.L
ptpn2.S				cfap70.L				ptpn2.S
zc3h11a.S				akna.S				zc3h11a.S
agtrap.L				loxl2.L				agtrap.L
bloc1s4.L				ttll10.L				bloc1s4.L
cuedc2.L				ccdc64b.L				cuedc2.L
tpx2.S				tril.S				tpx2.S
LOC108706515				wdr88.L				LOC108706515
kif15.S				tekt1.S				kif15.S
carnmt1.S				c2orf70.S				carnmt1.S
ptdss1.S				Xelaev18004129m				ptdss1.S
mmadhc.L				LOC108699458				mmadhc.L
ubxn4.L				ppp1r36.L				ubxn4.L
naa50.L				loc100145045.L				naa50.L
rnf167.L				klhdc9.L				rnf167.L
tbc1d17.S				dcdc2b.L				tbc1d17.S
fgfr4.S				msrb2.S				fgfr4.S
nras.L				efhb.L				nras.L
ralb.L				spag6.L				ralb.L
stk3				tekt2.S				stk3
pus7.L				txn.L				pus7.L
MGC81630				lrrc74a.L				MGC81630
slc25a13.S				ttll13p.L				slc25a13.S
atp6v0b.L				vstm5.L				atp6v0b.L
styx.S				crym.S				styx.S
nuf2.S				LOC108705769				nuf2.S
tsc22d1.L				fam166b.S				tsc22d1.L
dcp1b.S				Xetrov90005895m.L				dcp1b.S
caap1.L				slc41a3.S				caap1.L
impa2.L				hhex.L				impa2.L
ppp2cb.L				dnhd1				ppp2cb.L
tmem184c.L				myzap				tmem184c.L
nabp2.L				loc100494072.S				nabp2.L
mrpl3.S				cdkl4				mrpl3.S
fbf1.L				ccdc81.L				fbf1.L
kiaa1109.L				LOC108701701				kiaa1109.L
slc31a1.S				htr1a.L				slc31a1.S
ccdc120				ccdc13.L				ccdc120
trmt11.L				slc35e4-like.L				trmt11.L
LOC108704408				ak9				LOC108704408
dpy19l1.L				fbxw10.L				dpy19l1.L
fermt2.S				lrrc34.L				fermt2.S
bak1.L				akna.L				bak1.L
c20orf194.L				c11orf53.L				c20orf194.L
dppa2/4.1.L				tbata.L				dppa2/4.1.L
cyfip2.S				hba3.L				cyfip2.S
LOC108719053				ribc1.S				LOC108719053
vamp8.L				Xelaev18022505m				vamp8.L
aldh3b1.L				efcab5.S				aldh3b1.L
ccne2.S				ggt5.S				ccne2.S
bloc1s6.S				Xelaev18000343m				bloc1s6.S
cdc14b.S				lhb.S				cdc14b.S
trmt44.L				LOC108717174				trmt44.L
cdo1.S				tmem67				cdo1.S
tesk2.S				rem1.L				tesk2.S
slc12a4.L				Xelaev18041179m				slc12a4.L
sssca1.L				elmo3.L				sssca1.L
cept1.S				LOC108699362				cept1.S
smtn.L				ppl.L				smtn.L
sra1.S				LOC108709187				sra1.S
mdc1.L				ccdc33.L				mdc1.L
atp9a				kcnrg.L				atp9a
dennd4c.L				slc3a2				dennd4c.L
cnep1r1.L				LOC108718065				cnep1r1.L
cltcl1.L				sytl1.L				cltcl1.L
snx5.L				tuba1cl.2.L				snx5.L
lmnb3.S				bok.L				lmnb3.S
opa1.S				catip.L				opa1.S
zzef1.S				Xelaev18002192m				zzef1.S
spns1.L				btbd11.S				spns1.L
mipep.S				fam101b.L				mipep.S
ube2h.S				bix1.1.L				ube2h.S
ubac2.L				ca2.L				ubac2.L
mutyh.L				ccdc160.L				mutyh.L
usp24.L				Xelaev18009543m				usp24.L
csnk1g3.S				rsph1.L				csnk1g3.S
ppp1r9al.L				fgr.L				ppp1r9al.L
atxn3.L				LOC108705531				atxn3.L
cpt2.S				pdp2.S				cpt2.S
nup88.L				wdr66.L				nup88.L
cdc27.L				rapgef5.L				cdc27.L
kctd5.L				tex52				kctd5.L
naif1.S				ptprd.L				naif1.S
letm1.S				tmem178a.S				letm1.S
gm15246				capsl.L				gm15246
nsmaf.L				prox1.S				nsmaf.L
cdh3.L				ccdc146.L				cdh3.L
kiaa0368.L				slc16a9.S				kiaa0368.L
mst1.S				cfap52.S				mst1.S
mcl1.S				plk4.S				mcl1.S
arfgef1				dnah12.L				arfgef1
ttc13.S				armc4.S				ttc13.S
nusap1.S				LOC108705675				nusap1.S
znf605.L				ttll7.L				znf605.L
hmgxb4.S				lekr1.L				hmgxb4.S
extl2.L				axl.L				extl2.L
zfand3.L				eml6				zfand3.L
kif20a.S				slc3a2.L				kif20a.S
hacd3.L				noxred1.L				hacd3.L
pex26.L				galnt5.L				pex26.L
nphp4.L				LOC398451				nphp4.L
tnrc18				c9orf9.L				tnrc18
pard6g.S				ttc12.L				pard6g.S
ubxn2a.L				slit1				ubxn2a.L
pde7a.S				cux2.L				pde7a.S
znf395.S				saxo1				znf395.S
gpc4.S				lpar3.S				gpc4.S
smap1				LOC108704212				smap1
cdon.L				spag17.L				cdon.L
sin3b.L				slc26a4l.L				sin3b.L
LOC108711198				slc10a4.S				LOC108711198
zc3h7b.L				slc19a3.L				zc3h7b.L
dmd.1.L				tppp3.L				dmd.1.L
itch.S				mdh1b.L				itch.S
stxbp3.L				rdh11.S				stxbp3.L
dlx6.L				plcb2.L				dlx6.L
tmem33.S				dgkk.L				tmem33.S
crip3.S				zfpm1				crip3.S
brca1.L				rapgef3				brca1.L
aprt				LOC108711267				aprt
hmmr.L				cat1.L				hmmr.L
nprl3.L				irx5.S				nprl3.L
npc1.L				ttll13p.S				npc1.L
fam193b.L				dmrt2.L				fam193b.L
qrich1.2.S				adra2c.L				qrich1.2.S
scp2				dse.S				scp2
unkl.L				hoxa1.S				unkl.L
ofd1.L				gramd2b				ofd1.L
naf1.L				gas6.S				naf1.L
yrdc.S				galnt12.L				yrdc.S
tmem163.S				ankrd9.L				tmem163.S
plcd3.L				tcte1.L				plcd3.L
nabp2.S				ccdc67.L				nabp2.S
apba3.L				tekt3.S				apba3.L
vps13a.L				LOC108708387				vps13a.L
cdon.S				jhy				cdon.S
dtwd1.L				umodl1				dtwd1.L
LOC108700013				LOC108700672				LOC108700013
arih2.S				LOC108718814				arih2.S
ikbip.L				plxna2.L				ikbip.L
fra10ac1.L				tmprss2.2.L				fra10ac1.L
sestd1.L				slco2b1.S				sestd1.L
plxna1.S				tril.L				plxna1.S
txlng.L				iqub.L				txlng.L
patl1.L				sptlc3.S				patl1.L
stx7.L				LOC108703547				stx7.L
cyp26a1.S				ccdc180				cyp26a1.S
smn2.S				pm20d1.L				smn2.S
cdc23.L				frmd6.L				cdc23.L
ppp1cc.S				lrit1				ppp1cc.S
ccdc9.S				dopey1.S				ccdc9.S
ap3d1.L				frk.L				ap3d1.L
pef1.S				pip5kl1.S				pef1.S
MGC75760.L				zc3h12a.L				MGC75760.L
ano10.L				rrm2b.S				ano10.L
stk3.S				ly6e				stk3.S
ube2g1.S				slc38a3.S				ube2g1.S
msmb				slc35b4.L				msmb
lix1l.L				tcaf1.L				lix1l.L
micu1.S				agbl2.L				micu1.S
LOC108711638				wdr27.L				LOC108711638
ctdp1.S				rhobtb2.L				ctdp1.S
ap5m1.L				cdx2.S				ap5m1.L
ankrd54.S				vill.L				ankrd54.S
dhcr24.L				ttll9				dhcr24.L
rhbdd2.L				kcnj2.L				rhbdd2.L
sdha.S				ccdc171				sdha.S
cep131.L				ccdc177				cep131.L
plxna1.L				tex47				plxna1.L
ube2j1.L				loc100497395.S				ube2j1.L
znf407.L				c20orf96				znf407.L
wipi1.L				rab36.L				wipi1.L
arhgef39.L				pparg.S				arhgef39.L
lfng.L				sptlc3.L				lfng.L
ska3.L				tmlhe.S				ska3.L
pttg1				cerkl.L				pttg1
natd1.L				LOC108705424				natd1.L
gas1.S				mycbpap.L				gas1.S
trmt5.L				Xelaev18022620m				trmt5.L
dna2.S				prr7.L				dna2.S
cd99l2.L				LOC108702877				cd99l2.L
cwc27.S				c2orf50.L				cwc27.S
cul9.L				scel.L				cul9.L
cenph				glb1l2.S				cenph
kmt5a.S				ccdc83.L				kmt5a.S
ccdc50.S				bix1.2.L				ccdc50.S
cald1.S				tp73				cald1.S
metap1.L				pcnt.L				metap1.L
zdhhc15.S				tekt4.S				zdhhc15.S
aff1.L				dennd1b.L				aff1.L
hadha.S				c2orf50.S				hadha.S
ipmk.L				ccdc39.L				ipmk.L
LOC108704254				ccdc96.L				LOC108704254
rwdd1.S				dynlrb2				rwdd1.S
myo1a.L				loc100496187.L				myo1a.L
cmtm7.L				sytl2				cmtm7.L
c14orf93.L				fam92b.S				c14orf93.L
gpx7.S				LOC108708812				gpx7.S
atp8b4.L				ccdc63.S				atp8b4.L
galnt2.S				sidt1.S				galnt2.S
agpat1.S				ccdc65.S				agpat1.S
ercc2.L				grb7.L				ercc2.L
bloc1s5.L				gcm1.S				bloc1s5.L
dpy19l4.S				myo5c.L				dpy19l4.S
sfxn4.L				sytl5.L				sfxn4.L
hira.L				dnah2.L				hira.L
pcid2.S				atp13a4.L				pcid2.S
mon2.S				LOC108706691				mon2.S
ubtd2.L				LOC108707893				ubtd2.L
sppl2b.S				syt16.L				sppl2b.S
atp2b1.L				tlrs5				atp2b1.L
itpr1.S				rsph10b.S				itpr1.S
arhgap29.L				caps2.L				arhgap29.L
cnfn.3.L				tanc2.L				cnfn.3.L
soat2.S				lrrc23.S				soat2.S
dennd4c.S				LOC108698160				dennd4c.S
gna11.S				hydin.S				gna11.S
hmbs.L				liph.L				hmbs.L
wls.S				syt1				wls.S
insm1.L				capn8.2.L				insm1.L
pde7a.L				katnal1.S				pde7a.L
gpc4.L				LOC108708706				gpc4.L
lamp1.S				krt222.S				lamp1.S
foxo1.L				tsga10.L				foxo1.L
hand2.S				kitlg				hand2.S
ldlrap1.S				myo10.S				ldlrap1.S
fam175a.S				nipal1.L				fam175a.S
pik3c2a.L				dlec1.L				pik3c2a.L
map2k5.L				ttc21a.L				map2k5.L
dcaf17.L				rspry1.L				dcaf17.L
cetn3.S				gjb3l.S				cetn3.S
gdpd5				LOC108698822				gdpd5
abhd16a.L				b4galt4.L				abhd16a.L
ptprs				krt8.2.L				ptprs
cpsf4.L				c16orf87.L				cpsf4.L
lpp.L				lrrc61.L				lpp.L
ciao3.S				lhb.L				ciao3.S
pnpt1.S				foxa1.L				pnpt1.S
pfkfb4.S				anxa9.L				pfkfb4.S
adprhl2.L				rtbdn.S				adprhl2.L
fig4.L				niban2				fig4.L
hdac4.S				krt17.S				hdac4.S
MGC131138				bbs4.S				MGC131138
soga1.L				loc100492168.L				soga1.L
rnf216.L				tmem229bl.L				rnf216.L
acot9.L				clock.S				acot9.L
muc5acl.S				usp2.L				muc5acl.S
ccdc90b				inpp1.L				ccdc90b
cdca7l.L				gbx2.1.L				cdca7l.L
ptch1.L				ano10l.L				ptch1.L
ccne1.S				tm2d3.L				ccne1.S
ppp3ca.L				eps8l2.L				ppp3ca.L
rwdd4.S				cfap161.L				rwdd4.S
gcfc2.S				ccdc87				gcfc2.S
h6pd.L				LOC108707795				h6pd.L
pid1.S				parm1				pid1.S
lmo7.S				glipr2.S				lmo7.S
naga.L				stx3.L				naga.L
bnip2.S				fut4				bnip2.S
exoc5.S				arpc1a				exoc5.S
atp6v0a1.S				adcy9.L				atp6v0a1.S
shisa5				dlx2.L				shisa5
per3.S				lrrc36.L				per3.S
eps8l3.L				Xelaev18031009m				eps8l3.L
pigb.L				cfap45.S				pigb.L
efr3a.L				fut2.L				efr3a.L
eml2.L				egfr.L				eml2.L
c6orf203.L				c1orf158.L				c6orf203.L
LOC108704265				ccp110.S				LOC108704265
zfyve16.S				krt12.L				zfyve16.S
snx14.L				loc100216141.L				snx14.L
akap8.L				tmem181.L				akap8.L
fastkd2.L				esrra.L				fastkd2.L
gpt2.S				mboat1.S				gpt2.S
zfat.L				katnal1.L				zfat.L
fam135a.S				tnk2.S				fam135a.S
got2.S				wdr38.L				got2.S
fgfr4.L				cdc14a.L				fgfr4.L
tgif2.S				six3.L				tgif2.S
tgif2.L				fbxw9.S				tgif2.L
kiaa1033.L				hmha1.S				kiaa1033.L
Xelaev18030357m				adgrf1.L				Xelaev18030357m
yes1.L				Xetrov90020413m.S				yes1.L
vash2.S				anxa11.L				vash2.S
slc2a8.L				hid1.L				slc2a8.L
fez2.L				ccn2				fez2.L
ttl.L				nkx2-3.L				ttl.L
cyb5r4.S				trim13.L				cyb5r4.S
velo1.L				march10.L				velo1.L
wnk2.L				ccdc24.L				wnk2.L
acat2.L				wrap73.L				acat2.L
cyp2c18.S				ttc6.L				cyp2c18.S
psip1				rfk.S				psip1
pdxk.L				LOC108709811				pdxk.L
tdrd1.L				ggt6				tdrd1.L
MGC81661				map9.L				MGC81661
sec31b.S				wdr63.L				sec31b.S
Xelaev18028564m				usp2.S				Xelaev18028564m
neurl1b.S				prr18.S				neurl1b.S
shroom3.L				armc3.L				shroom3.L
smagp.S				rab37.L				smagp.S
tmem184b.S				plxna2.S				tmem184b.S
pla2g6.L				lrrc46				pla2g6.L
Xelaev18015396m				ahnak				Xelaev18015396m
abhd17b.S				fzd10.L				abhd17b.S
dda1.L				itpkb				dda1.L
nptn.L				ccdc191.L				nptn.L
fam172a				dzank1.L				fam172a
traf3ip2				cdc14a.S				traf3ip2
itpr1.L				ppp4r4.L				itpr1.L
upk2				zfpm1.S				upk2
pms1.S				LOC100486385.L				pms1.S
znf830.S				syt13				znf830.S
edc4.L				eps8l1.S				edc4.L
gemin2.S				alg11.L				gemin2.S
jak1.L				c17orf98				jak1.L
dpy19l3.L				kctd9.L				dpy19l3.L
mesdc2.L				dnah10.L				mesdc2.L
rbpms2.S				tmem53.L				rbpms2.S
wdr81.L				iqca1.L				wdr81.L
ppa1.L				kif27				ppa1.L
cenpa.L				vsig8.L				cenpa.L
acadl.L				stkld1.L				acadl.L
mrps17.L				pcdh10.L				mrps17.L
foxf1.L				styk1.L				foxf1.L
rab29.S				invs.S				rab29.S
commd2.L				sytl1.S				commd2.L
lrp1.S				slco4c1.L				lrp1.S
arl15.L				cep350				arl15.L
best2.L				lrrc9.L				best2.L
mfsd4b.S				ankrd66				mfsd4b.S
srsf7.L				saxo2.L				srsf7.L
cttnbp2.L				Xelaev18000198m				cttnbp2.L
thtpa.S				fam160a1.S				thtpa.S
h6pd.S				LOC108704529				h6pd.S
znf276.S				esrra.S				znf276.S
alg10.S				adam9				alg10.S
mterf3.S				sept8.S				mterf3.S
MGC84586				gjb1.L				MGC84586
snx6.S				sgsm3.L				snx6.S
alas1.S				cfap57.L				alas1.S
paip1.S				ccdc108.L				paip1.S
tceanc2.S				ccdc60.L				tceanc2.S
tut7.S				ccdc27.S				tut7.S
eps15l1.L				casc1.L				eps15l1.L
edil3.S				rab3d.S				edil3.S
fut10.L				inf2				fut10.L
parg.L				plekha6.S				parg.L
btbd19.S				sh3rf1.L				btbd19.S
klc1.L				LOC108709394				klc1.L
tpx2.L				gdpd1.L				tpx2.L
cog2.S				b4galnt3.S				cog2.S
insm1.S				hsbp1l1.S				insm1.S
slc30a2.S				atp11c.L				slc30a2.S
osbpl11.S				cfap206.L				osbpl11.S
shroom2.L				pcdh8.2.S				shroom2.L
pgk1.L				LOC108710961				pgk1.L
lamp1.L				cgrrf1.L				lamp1.L
cers3.L				LOC108699634				cers3.L
elavl3.L				krt18				elavl3.L
c8orf76.S				ccdc113.L				c8orf76.S
mettl16.L				pde9a.L				mettl16.L
ndufaf5.L				rab27a.S				ndufaf5.L
snx22.L				LOC108705949				snx22.L
dopey2.S				fbxo43.L				dopey2.S
abr.S				cep295.S				abr.S
st3gal-iii				cfap157.L				st3gal-iii
rab3a.L				zdhhc1.L				rab3a.L
arhgef2.L				igsf9b.L				arhgef2.L
uggt2.L				ccdc173.L				uggt2.L
slc44a4.S				xk81a1.L				slc44a4.S
lca5.L				sidt1.L				lca5.L
kdm2a.S				heg1.L				kdm2a.S
ctnnal1.S				ca12.L				ctnnal1.S
herc3.L				strc				herc3.L
plekhg3.L				reps2.L				plekhg3.L
pard3b-like.L				creb3l1				pard3b-like.L
wdhd1.L				fjx1.S				wdhd1.L
fam107b.S				ribc1				fam107b.S
rmdn3.L				tbc1d24.2.S				rmdn3.L
tarbp1.L				tmem150a				tarbp1.L
rnf123.L				robo2				rnf123.L
appl1.S				efhc1.L				appl1.S
slmap.L				foxl2.L				slmap.L
acsl6.L				LOC108698173				acsl6.L
rb1cc1.S				scnn1g.S				rb1cc1.S
fam109b.L				ccdc151.L				fam109b.L
herc1.L				krt18.3.S				herc1.L
abr.L				speg				abr.L
c15orf41.L				greb1.L				c15orf41.L
znf182				LOC108705105				znf182
atg16l1.L				b9d2.L				atg16l1.L
LOC108708488				samd15.L				LOC108708488
sh3bp1.L				cetn4.L				sh3bp1.L
cdc27.S				vill.S				cdc27.S
cyp4v2.S				loc100494782.L				cyp4v2.S
tmem220.L				foxn4.S				tmem220.L
Xelaev18041216m				eps8l1.L				Xelaev18041216m
umad1.L				hook1.L				umad1.L
armc8.S				st3gal4.L				armc8.S
hacd3.S				arhgap27.S				hacd3.S
inpp5a.1.S				Xelaev18037285m				inpp5a.1.S
sh3d19.S				LOC108704696				sh3d19.S
mcm3.L				nipal2.S				mcm3.L
gpi.L				c1galt1.S				gpi.L
hace1.L				furin.L				hace1.L
gpatch1.L				cfap100.L				gpatch1.L
prrg1.S				xrra1.L				prrg1.S
parp11.S				hexd				parp11.S
fpgs.S				asb13.L				fpgs.S
zc3h12c.S				slc25a22.L				zc3h12c.S
caprin2.L				kiaa1217.S				caprin2.L
gpr137c.S				edem1.S				gpr137c.S
dapk3.L				efcab2.L				dapk3.L
rab27b.L				Xelaev18037313m				rab27b.L
smco4.L				fzd10.S				smco4.L
pdk4.S				bcat1.L				pdk4.S
usp24				lrrc71.L				usp24
tars2.L				nav1.L				tars2.L
LOC108700849				drc7				LOC108700849
mapkap1.L				rab25.L				mapkap1.L
appl2.L				ptk2b.S				appl2.L
nrbp1.L				sytl2.L				nrbp1.L
slc16a3.L				ttll5.L				slc16a3.L
LOC108718301				rnf152				LOC108718301
dcp1a				bmpr2.L				dcp1a
abcb9.L				meis3.L				abcb9.L
mvb12b.S				Xelaev18028823m				mvb12b.S
smagp.L				atp2a3.L				smagp.L
acbd5.L				alms1.L				acbd5.L
pald1.L				slc16a12.L				pald1.L
atg4c.L				rbbp8nl.S				atg4c.L
slc26a6.L				tctex1d1.S				slc26a6.L
cnpy2.S				ndel1.S				cnpy2.S
slc30a9.S				trappc4.S				slc30a9.S
kiaa1328.L				errfi1.S				kiaa1328.L
tapt1.S				tmem87b.L				tapt1.S
sall1				tacc2.L				sall1
prelid2.L				fbn3.S				prelid2.L
tmem62.S				mfsd6.S				tmem62.S
c17orf53.S				gpd1.L				c17orf53.S
ankrd27.L				chl1				ankrd27.L
spidr.L				fam183b.L				spidr.L
akap12.L				gmppb.S				akap12.L
pex1.L				kcne5.S				pex1.L
lrrk2.L				kndc1.L				lrrk2.L
tpte2.L				rabl2b.S				tpte2.L
sh3bp5.S				stoml1.L				sh3bp5.S
dis3l2.L				prdx4.L				dis3l2.L
asap1.S				cfap44.L				asap1.S
mospd2.L				plekha8.L				mospd2.L
loc100158410.L				atp6v1g3.L				loc100158410.L
plin3.L				sgk3.S				plin3.L
sbk1.L				sptssb				sbk1.L
myo5a.L				sdpr.S				myo5a.L
wdfy2.L				LOC108712926				wdfy2.L
arhgap10.S				abcg2.L				arhgap10.S
zmat3.S				hoxa1.L				zmat3.S
utrn.L				ephb2.S				utrn.L
ptar1.L				sgms1.L				ptar1.L
mycbp2.L				elk4.S				mycbp2.L
dap.L				ctbs.S				dap.L
alkbh8.S				hspa5				alkbh8.S
rpap1.L				ttc39a.L				rpap1.L
rgs3.L				cog1.S				rgs3.L
dapk1.L				foxq1.L				dapk1.L
gstcd.L				Xelaev18004144m				gstcd.L
cnih4.S				glo1.S				cnih4.S
lrrc16a.S				c9orf116.S				lrrc16a.S
st3gal6.L				tnk2.L				st3gal6.L
rnf5.L				slc30a10.L				rnf5.L
mrpl1.L				cfap126.L				mrpl1.L
rassf2.L				ppp1r3c.1.L				rassf2.L
tmem55a.L				dixdc1.L				tmem55a.L
apba2.S				MGC52899				apba2.S
acsf3.S				h1f0.S				acsf3.S
dis3l.L				foxj1.2.L				dis3l.L
tubgcp3.S				galnt6.3.L				tubgcp3.S
unc93a.L				dspp				unc93a.L
stat2.L				sgk2.L				stat2.L
mfsd12.L				fam227a.L				mfsd12.L
s1pr5.L				c1galt1c1.L				s1pr5.L
ano1.L				txndc11.L				ano1.L
sspo.L				myo1e				sspo.L
LOC108704332				ccdc40.S				LOC108704332
glce.L				mycbp.S				glce.L
kmt5a.L				nxpe3				kmt5a.L
tmem255a.S				mgst1.L				tmem255a.S
tlk1.S				bbs12.L				tlk1.S
rwdd1.L				gby.L				rwdd1.L
acat1.L				usf1				acat1.L
ccdc68.S				zbbx.L				ccdc68.S
lhfpl2.L				fam126b				lhfpl2.L
ppp3cc				Xelaev18028374m				ppp3cc
tdh.S				golga3.S				tdh.S
gpd2.L				hoxa11.S				gpd2.L
ankrd29.L				galnt6.1.S				ankrd29.L
rps6kc1.L				plekhg5.S				rps6kc1.L
sptbn5.L				hk2.S				sptbn5.L
dcaf6.L				rab15.L				dcaf6.L
spast.L				bmp7.1.S				spast.L
specc1				mmp11.S				specc1
jag1.L				atf7ip.S				jag1.L
top1.2.S				nek6				top1.2.S
ttc13.L				gcnt4				ttc13.L
mmp15.S				zdhhc9.L				mmp15.S
rbm38.S				rab34.S				rbm38.S
snx7.L				trabd.S				snx7.L
orc6.L				tctex1d1.L				orc6.L
cc2d1b.S				MGC75872.S				cc2d1b.S
tyro3.L				pih1d3.L				tyro3.L
hnrnpll.S				kmt2c.L				hnrnpll.S
tp53i11.S				gmppa.L				tp53i11.S
nploc4.L				lmo4.1.L				nploc4.L
LOC108713105				atp6ap1.1.S				LOC108713105
mgat4b.L				gnpnat1.L				mgat4b.L
ttc39a.S				fam83e.S				ttc39a.S
inpp5a.1.L				efcab7.L				inpp5a.1.L
apln.L				nhsl1				apln.L
timeless.S				slc35c2.S				timeless.S
pdzd2.S				itgb3.L				pdzd2.S
slc38a9				jun.L				slc38a9
myo1c.S				chsy1.S				myo1c.S
phc3.L				lrmp.L				phc3.L
tyw3.L				isl1.L				tyw3.L
kiaa0825.L				b3gnt7.S				kiaa0825.L
snn.S				bnip1.L				snn.S
tmem221.L				mkl1.L				tmem221.L
xpo6.L				zdhhc2				xpo6.L
rnf41.L				nefm.L				rnf41.L
loc733556.L				tekt1.L				loc733556.L
taok3.L				elk4.L				taok3.L
hbox10.S				ccdc103				hbox10.S
rps6kc1.S				tab2.L				rps6kc1.S
gdf9.L				sowaha.S				gdf9.L
naxd.L				ankrd22.S				naxd.L
dph5.S				pih1d1.L				dph5.S
slc9a7.S				sytl5.S				slc9a7.S
irx1.L				plcb4.S				irx1.L
map2k7.S				drc3.L				map2k7.S
LOC108712660				slc8b1.L				LOC108712660
tex2.2.S				dnah5				tex2.2.S
pou5f3.3.L				pacrgl.L				pou5f3.3.L
cndp1.L				sigirr.S				cndp1.L
tex2.2.L				cyth2.L				tex2.2.L
prkar2b.S				stpg4				prkar2b.S
LOC105947450.S				sertad4.S				LOC105947450.S
pou5f3.3.S				rnf149.S				pou5f3.3.S
cyp51a1.L				tctn3.L				cyp51a1.L
trpv2.L				sytl2.S				trpv2.L
cgnl1.S				ccdc157				cgnl1.S
ankrd35.L				csta				ankrd35.L
arhgap10.L				Xelaev18003283m				arhgap10.L
eps8.S				dedd2.S				eps8.S
pik3r4.S				crybg3.S				pik3r4.S
nbas.L				MGC83023				nbas.L
lpp				tbcel.L				lpp
adamts1.L				nfat5.L				adamts1.L
eps8.L				rarres1.L				eps8.L
lrp1.L				znf703.L				lrp1.L
fbxw8.L				chpf.S				fbxw8.L
snx5.S				tp73.L				snx5.S
pik3r2.L				rab19.L				pik3r2.L
c1orf159.L				c4orf47.L				c1orf159.L
megf11				dnai2.S				megf11
lhx5.S				mcm5.S				lhx5.S
ubtd2.S				aadacl4.S				ubtd2.S
amfr.L				galnt4.L				amfr.L
rcc1.S				capn13.L				rcc1.S
iqgap1				phlda2				iqgap1
bcs1l.L				klhdc8a.S				bcs1l.L
wdr44.S				prr5.L				wdr44.S
lonrf3.L				fa2h.L				lonrf3.L
st3gal2.1.L				cep76.L				st3gal2.1.L
ethe1.S				chn1.L				ethe1.S
zyg11b.S				golgb1.L				zyg11b.S
hras.L				Xelaev18028825m				hras.L
osbpl1a.L				arhgef28.S				osbpl1a.L
atp8a1.S				enkur.L				atp8a1.S
chst2.L				MGC83169				chst2.L
wee2.S				amot.S				wee2.S
clstn2.S				fbxo16.L				clstn2.S
rgcc.S				per2.L				rgcc.S
atp8a1.L				Xelaev18025028m				atp8a1.L
c7orf60.S				kif3b				c7orf60.S
LOC100158299				tstd1.S				LOC100158299
pclo.L				smtnl1				pclo.L
LOC108714350				nkd1.L				LOC108714350
ctf2				atp7b.L				ctf2
cr1b				farp2.L				cr1b
dgkq.S				rnf43.S				dgkq.S
hps1.S				LOC108714578				hps1.S
dus1l.L				capn1.L				dus1l.L
lhx8.L				camkk2.S				lhx8.L
rnf34.L				bsn.S				rnf34.L
mpp6.S				gcnt1.S				mpp6.S
slco5a1.S				ehd4.L				slco5a1.S
pdpr.L				tctn2.L				pdpr.L
pawr.L				tanc2				pawr.L
btbd8.L				maats1				btbd8.L
lrrc16a.L				ern2.L				lrrc16a.L
tdgf1.3.L				sh3d21.S				tdgf1.3.L
bscl2.L				znf474.S				bscl2.L
kcnma1.L				xk.L				kcnma1.L
lonp2.L				zmynd10.L				lonp2.L
ubac1.S				vsig10.L				ubac1.S
adgrg1.S				cfap58				adgrg1.S
crbn.S				LOC108699297				crbn.S
homer3.S				pdk3.L				homer3.S
hyal2.S				adgrf5				hyal2.S
bod1l1.L				lgalsl.S				bod1l1.L
brpf3.S				LOC108711247				brpf3.S
tango6				arntl.L				tango6
nf2.L				nrbp2.L				nf2.L
hnrnpll.L				MGC154492				hnrnpll.L
ano8.L				slc35a3.2.S				ano8.L
cox5b.2.L				s100a2				cox5b.2.L
fcho1.S				ypel2.L				fcho1.S
trmo.L				arid3a				trmo.L
dcaf10.S				poc5.L				dcaf10.S
cntln.L				sp7.S				cntln.L
chst10.L				nfe2l3.L				chst10.L
taok1.L				nrdc.L				taok1.L
fndc7.L				csrnp2.L				fndc7.L
rph3a.S				ifngr2.1.L				rph3a.S
tex264.S				MGC68910				tex264.S
gdpd5.S				ankef1.L				gdpd5.S
elavl3				slc16a9.L				elavl3
dapl1.S				col16a1				dapl1.S
mogat2.2.L				abcb5				mogat2.2.L
atp9b.L				cep135.L				atp9b.L
mov10l1.L				LOC108717899				mov10l1.L
pcdh9.S				degs3.S				pcdh9.S
chd3				cdk20.L				chd3
c18orf8.S				galnt6				c18orf8.S
tor1b.L				nfe2l3.S				tor1b.L
emp1.L				meioc				emp1.L
ccdc62.L				nr6a1.S				ccdc62.L
gas1.L				nipa2.S				gas1.L
slc38a9.S				ccdc14				slc38a9.S
cgnl1.L				fblim1.S				cgnl1.L
baiap2.S				mfsd6l.L				baiap2.S
scaper.L				LOC108704226				scaper.L
pcdh19				LOC108701745				pcdh19
sh3pxd2b.L				hk1.L				sh3pxd2b.L
pdpr.S				amotl2.S				pdpr.S
apba1.L				creb3l4.L				apba1.L
gpr137c.L				ascl1.L				gpr137c.L
nfkbie.L				pik3ca.S				nfkbie.L
slc22a15.2.S				samd12				slc22a15.2.S
fam65c.L				poc1a.L				fam65c.L
ccdc88a				zfand2b.S				ccdc88a
MGC115216				LOC108704569				MGC115216
rnf170.S				nek5.L				rnf170.S
pcdh18.L				spef2.L				pcdh18.L
slc6a14.2.L				tchh				slc6a14.2.L
patl2.L				kiaa0556.L				patl2.L
prdm9.L				arl6ip1.S				prdm9.L
elmo2.L				nfkb2.L				elmo2.L
tor1b.S				rnf145l.L				tor1b.S
gtf2i.S				arfip2				gtf2i.S
mcoln2.L				gmpr2.S				mcoln2.L
LOC108709626				cpt1a.L				LOC108709626
LOC108709746				LOC108705534				LOC108709746
rmdn2.S				nfe2l2.L				rmdn2.S
map3k4.S				dnaaf3.L				map3k4.S
inpp4a.S				nipal3.L				inpp4a.S
acer2.L				cib1.S				acer2.L
fitm2.L				snx33.L				fitm2.L
atg4c.S				LOC108698123				atg4c.S
LOC108718445				bbip1.L				LOC108718445
lin54.S				jun.S				lin54.S
rnf130.S				ift46.L				rnf130.S
ezh1.S				ptprn.S				ezh1.S
Xelaev18008189m				ankdd1b.L				Xelaev18008189m
fam73a.L				map4k3.L				fam73a.L
cited2.L				dnali1.S				cited2.L
MGC115657				pgm3.L				MGC115657
LOC108719547				tmcc1.S				LOC108719547
ccnb1.L				bbs1.L				ccnb1.L
LOC108701404				fbxo46.L				LOC108701404
inpp4a.L				xepsin.L				inpp4a.L
tbc1d22b.S				tbccd1.L				tbc1d22b.S
kifap3.S				vtcn1.L				kifap3.S
gmnc.L				rgs12.L				gmnc.L
sorbs3.L				map3k10.L				sorbs3.L
prnp.S				fam3d.S				prnp.S
kank3.S				cntrob				kank3.S
fam189a1.S				col1a2.L				fam189a1.S
crx.L				s100g				crx.L
brap.L				sipa1l3.L				brap.L
lrp2.L				efcab1.S				lrp2.L
dennd2c.L				fam3a.L				dennd2c.L
ppfibp2				mfhas1				ppfibp2
gdpd5.L				tubb4b.S				gdpd5.L
zic1.L				fam83f.L				zic1.L
fbxo25.L				mid1ip1.S				fbxo25.L
efna5.S				styk1.S				efna5.S
tmem39b.L				specc1l				tmem39b.L
adcy4.L				pick1.S				adcy4.L
pdgfb.L				slc4a1.S				pdgfb.L
ehbp1				plpp5.L				ehbp1
flrt1.S				mob2.2.L				flrt1.S
MGC115510				capn8.1.S				MGC115510
gprc5b.S				angpt4.S				gprc5b.S
gbf1.L				gne.S				gbf1.L
grip1				cep170b.S				grip1
irf8.L				ganab.L				irf8.L
LOC108703941				thbs1.L				LOC108703941
zar1l.L				snai1.S				zar1l.L
tada2a.L				slc9a3r2.S				tada2a.L
LOC108709286				cenpj.L				LOC108709286
ywhag.L				tbx3.L				ywhag.L
rgcc.L				caskin2.S				rgcc.L
larp1b.S				rsph6a.L				larp1b.S
admp2.L				bmpr2.S				admp2.L
csnk1g2.L				bace2.L				csnk1g2.L
ehbp1.L				fam83h.S				ehbp1.L
adat1.S				rab3a.S				adat1.S
oma1.S				fam20b.S				oma1.S
ins				miip.L				ins
loc100493164.L				hid1.S				loc100493164.L
rev1.S				clcn5.L				rev1.S
tnfaip8l3.S				ankrd24.L				tnfaip8l3.S
dand5.S				camk2g.L				dand5.S
csk.L				cfap20.S				csk.L
corin.L				dydc1.L				corin.L
rdh9.L				stard3.L				rdh9.L
ralgps2.L				kcnj15.L				ralgps2.L
b3gnt4.L				comt.L				b3gnt4.L
zcchc11.S				pik3r2.S				zcchc11.S
scube2.L				adck1.L				scube2.L
slc20a2.L				Xelaev18013479m				slc20a2.L
foxh1.2.L				krt16.L				foxh1.2.L
prdm1.S				mfsd6l.S				prdm1.S
hal.2.L				muc3a				hal.2.L
filip1.L				ccdc96.S				filip1.L
kiaa0226l.S				MGC52622				kiaa0226l.S
ror2.L				slc30a7.S				ror2.L
golga2				depdc7.S				golga2
sema3c.S				sphk1.L				sema3c.S
Xetrov90024734m.S				arhgap27.L				Xetrov90024734m.S
cmpk2.L				ago3				cmpk2.L
1500009l16rik				loc734020.L				1500009l16rik
sds.L				dhcr7.S				sds.L
arhgap26.L				mapk15.L				arhgap26.L
atoh1.S				mdk.S				atoh1.S
cyp1a1.S				LOC108697646				cyp1a1.S
grin1.S				cxcl16.L				grin1.S
LOC108715669				post.L				LOC108715669
letmd1.L				Xelaev18019738m				letmd1.L
mab21l2.S				ralgps1.S				mab21l2.S
itprip.S				retsat.L				itprip.S
aifm3.L				smpd1.L				aifm3.L
tspan1.S				fam160a1.L				tspan1.S
tmem158.S				cebpd.L				tmem158.S
gpr65.S				spata6l.L				gpr65.S
LOC108708493				cfap45.L				LOC108708493
pdp1.L				ptpn23.S				pdp1.L
rev1.L				LOC108701166				rev1.L
h1foo.L				c18orf54.S				h1foo.L
grem1.L				heatr6.S				grem1.L
immp1l.L				gk.S				immp1l.L
LOC101243550				golph3l.S				LOC101243550
traf4.S				tll1.S				traf4.S
emilin2.L				itfg1.S				emilin2.L
xpo6.S				trpm5.L				xpo6.S
ccnb1.S				MGC154819				ccnb1.S
znf577.L				ccdc149.S				znf577.L
trafd1.S				unc50.L				trafd1.S
dapl1.L				golga3.L				dapl1.L
crx.S				MGC131348				crx.S
wasll.S				esrp1.S				wasll.S
adgre1				LOC108706721				adgre1
prdm1.L				rhof.L				prdm1.L
slc6a8.S				baz2b.L				slc6a8.S
cyp1a1.L				tlcd2.S				cyp1a1.L
ptpru.S				ptbp3.L				ptpru.S
LOC108709196				MGC98819				LOC108709196
LOC108701852				post7p.L				LOC108701852
keap1				rxra.S				keap1
ccndx.S				cdkl2.L				ccndx.S
prdm14.S				edem3.S				prdm14.S
foxi2.L				post10.L				foxi2.L
spon2.L				endod1.L				spon2.L
dlk2.S				tuba1cl.2.S				dlk2.S
txnrd1.S				tmem218.L				txnrd1.S
c11orf96.S				spsb3				c11orf96.S
tmcc2.S				LOC108704568				tmcc2.S
optn.S				tmem63a.L				optn.S
olig3.S				atp13a2.L				olig3.S
tph1.S				slc6a7				tph1.S
prickle4.S				slc10a3.S				prickle4.S
cxcl11.L				LOC108702892				cxcl11.L
lrrn4.S				trpv6.L				lrrn4.S
pigv-like.L				mfsd14a.S				pigv-like.L
loc100489834.L				foxn4.L
lrrc18.L				c19orf44.L
lrrc31				ndufa8.S
kiaa1549l.S				dhcr7.L
LOC100488736-like.1.1				flrt2.L
stmnd1.S				post5.S
bc051019				krt8.S
ai661453				Xelaev18038969m
fam81b.S				raver2.S
LOC101733219.S				rab8b.L
LOC100488736-like.2.1				epn3.L
LOC108711774				ralgapb.L
spata18-like.L				syne3.L
tmc5.L				lpcat1.S
LOC108696147				deaf1.L
kiaa1324.L				bnip2
hmx3.L				tbc1d15.S
ikzf2.S				ube3a.L
colca2.L				higd1a.L
hgf.S				paqr5.S
ccdc17.L				bean1.L
LOC108708418				ppp1r18
pou1f1.L				elovl3.S
epn3.S				gosr2.L
sstr5.S				etnk1.L
casz1.L				dnaaf1.S
ppp1r32.L				elmsan1.L
LOC100127337				c21orf59.S
ttc24.L				tfcp2.L
neurl1.L				cep70.L
loc100127564.L				capns1.L
capsl.S				efnb2.L
cdhr4.L				man2a1.L
gnaz.L				ncoa2.L
prr29.L				npdc1.1.S
t.L				gopc.S
myo15b.L				tm9sf2.L
tacr1.S				rsph9.L
b3gnt3.L				fam63a.S
LOC108710713				trim68
morn3.S				ubp1.L
efhc2.S				gata6.S
LOC108708075				kdm7a.S
lrrc73.S				zbtb46.L
scn5a				macc1.L
pip5k1b.S				stil.L
msrb2.L				gas8.S
cracr2a.L				tmem200c.S
ccdc78.S				sphk2.L
gpr156.S				ncor2
MGC75872.L				dnaaf5.S
cfap70.L				dnai1.L
akna.S				chmp4c.L
loxl2.L				sorcs1.S
ttll10.L				cep350.S
ccdc64b.L				nme9.L
tril.S				MGC81163
wdr88.L				yipf4.L
tekt1.S				meis2
c2orf70.S				dab2ip.L
Xelaev18004129m				gmppb.L
LOC108699458				gcm1.L
ppp1r36.L				ift52.L
loc100145045.L				LOC108695829
klhdc9.L				yipf4.S
dcdc2b.L				pear1.L
msrb2.S				ptprz1.L
efhb.L				golga1.L
spag6.L				slc35a2.L
tekt2.S				galnt7.L
txn.L				ccm2.S
lrrc74a.L				leprotl1.S
ttll13p.L				slc4a11.L
vstm5.L				sec22b.L
crym.S				rfx1.S
LOC108705769				tmprss4.L
fam166b.S				dusp8.S
Xetrov90005895m.L				arap1
slc41a3.S				ndfip2.S
hhex.L				gm39120
dnhd1				abcd1.L
myzap				zfand4.S
loc100494072.S				fbxo15.S
cdkl4				nlrc4.L
ccdc81.L				tspan13.S
LOC108701701				pcdh7.S
htr1a.L				cdk7.L
ccdc13.L				amotl2.L
slc35e4-like.L				chpf.L
ak9				trim8
fbxw10.L				iqsec2.L
lrrc34.L				mbd6.S
akna.L				stim1.S
c11orf53.L				cfap52.L
tbata.L				tfcp2l1.S
hba3.L				capns2.S
ribc1.S				zbtb46.S
Xelaev18022505m				socs5.S
efcab5.S				tmem259.L
ggt5.S				pknox1.S
Xelaev18000343m				ttc41
lhb.S				nme5.L
LOC108717174				mgat1.L
tmem67				hs3st3a1.L
rem1.L				dlx1
Xelaev18041179m				1700030j22rik
elmo3.L				LOC108713208
LOC108699362				colgalt1.L
ppl.L				usp21
LOC108709187				rab15.S
ccdc33.L				slc6a16.S
kcnrg.L				apeh.L
slc3a2				stard10.L
LOC108718065				pik3r1.S
sytl1.L				ngfr.S
tuba1cl.2.L				ano9.L
bok.L				brca2.L
catip.L				tmem183a.L
Xelaev18002192m				kcnk1.S
btbd11.S				yif1b.L
fam101b.L				vangl1.S
bix1.1.L				lrrcc1.L
ca2.L				slc16a6.L
ccdc160.L				flii.L
Xelaev18009543m				ccdc130.L
rsph1.L				lrtomt.S
fgr.L				nipal4.L
LOC108705531				slc16a6.S
pdp2.S				MGC82342
wdr66.L				trim45.L
rapgef5.L				gigyf2.S
tex52				ywhah.S
ptprd.L				dmxl1.L
tmem178a.S				sh3d21.L
capsl.L				faim.S
prox1.S				g67.L
ccdc146.L				kif24.L
slc16a9.S				sipa1l3.S
cfap52.S				sun1.L
plk4.S				uckl1.S
dnah12.L				tbx3.S
armc4.S				rest.S
LOC108705675				fer1l4
ttll7.L				loc100497729.L
lekr1.L				abhd13.S
axl.L				bcar1.L
eml6				tmem238.S
slc3a2.L				tmem168.S
noxred1.L				kiaa1324.S
galnt5.L				atp1b2.S
LOC398451				ergic2.L
c9orf9.L				purg.L
ttc12.L				cspp1.L
slit1				LOC100486385.S
cux2.L				ubl3
saxo1				prkca.S
lpar3.S				LOC108700400
LOC108704212				c2cd3.S
spag17.L				ribc2.L
slc26a4l.L				spag8
slc10a4.S				fry.L
slc19a3.L				ap1b1.L
tppp3.L				rbm47.L
mdh1b.L				pi4k2a.L
rdh11.S				bmp7.1.L
plcb2.L				btg3.L
dgkk.L				slain2.L
zfpm1				fzd8.S
rapgef3				ift20.L
LOC108711267				irak1bp1.S
cat1.L				smad9.S
irx5.S				map3k2.L
ttll13p.S				ccno.S
dmrt2.L				lig4.L
adra2c.L				ccdc112.L
dse.S				bbs7.L
hoxa1.S				slc35f5.L
gramd2b				slc44a3.L
gas6.S				tbx2.S
galnt12.L				rbm23.L
ankrd9.L				rnf115.S
tcte1.L				c8g.S
ccdc67.L				cltc.L
tekt3.S				rnft1.L
LOC108708387				gpr160.L
jhy				smim7.S
umodl1				slc30a5.S
LOC108700672				katnb1.L
LOC108718814				c3orf14.L
plxna2.L				ly6g6c.L
tmprss2.2.L				eef1a1o.L
slco2b1.S				zbtb7b.S
tril.L				LOC108696555
iqub.L				Xelaev18040914m
sptlc3.S				entpd4.S
LOC108703547				elmsan1.S
ccdc180				mypop.L
pm20d1.L				atf7.L
frmd6.L				wdr31.L
lrit1				LOC108704672
dopey1.S				slc50a1.L
frk.L				det1.L
pip5kl1.S				calr
zc3h12a.L				cfap77
rrm2b.S				clcnkb
ly6e				dnajc3.L
slc38a3.S				npdc1.1.L
slc35b4.L				MGC68448
tcaf1.L				ydjc.L
agbl2.L				spryd3.L
wdr27.L				reep4.L
rhobtb2.L				mars2
cdx2.S				msx1.L
vill.L				prpf39
ttll9				nr2f6
kcnj2.L				bbs5.L
ccdc171				LOC108704278
ccdc177				acbd3.L
tex47				tnrc6b.L
loc100497395.S				sik1.S
c20orf96				szl.L
rab36.L				ube2n.S
pparg.S				nfe2l1.S
sptlc3.L				mgat4a.S
tmlhe.S				pidd1.L
cerkl.L				ganc.L
LOC108705424				fam174b.L
mycbpap.L				prkar1a.S
Xelaev18022620m				tmem238
prr7.L				fam174b.S
LOC108702877				Xelaev18000128m
c2orf50.L				zbtb21.S
scel.L				dera.S
glb1l2.S				rab11a.S
ccdc83.L				mns1.L
bix1.2.L				mycbp.L
tp73				tdg.S
pcnt.L				rundc1.S
tekt4.S				kdf1.L
dennd1b.L				ncoa1.S
c2orf50.S				prelid1.S
ccdc39.L				tfcp2l1.L
ccdc96.L				adipor2.S
dynlrb2				rnf44.L
loc100496187.L				tnrc6b.S
sytl2				ddost.S
fam92b.S				cep350.L
LOC108708812				dnaaf2.L
ccdc63.S				vwa5a.L
sidt1.S				pcdh1.L
ccdc65.S				endod1.S
grb7.L				MGC82989
gcm1.S				itpr2
myo5c.L				kiaa0753.S
sytl5.L				c5orf15.S
dnah2.L				rassf6.S
atp13a4.L				hipk1.S
LOC108706691				chmp1b.L
LOC108707893				tbc1d25.S
syt16.L				Xelaev18000401m
tlrs5				dnajb5.L
rsph10b.S				mpzl1.S
caps2.L				tll1-like.1.L
tanc2.L				wdr13.L
lrrc23.S				tmco3.L
LOC108698160				nfe2l1.L
hydin.S				stk36.L
liph.L				tmed1.L
syt1				kiaa0141.S
capn8.2.L				ncor1.L
katnal1.S				rps21
LOC108708706				rhbdf2.L
krt222.S				tax1bp3.S
tsga10.L				LOC108719340
kitlg				rps3a.L
myo10.S				mpp5.L
nipal1.L				wwtr1.L
dlec1.L				rpl27a.S
ttc21a.L				MGC84460
rspry1.L				hes1.L
gjb3l.S				hmgcl.S
LOC108698822				katnal2.L
b4galt4.L				degs1.L
krt8.2.L				pknox1.L
c16orf87.L				derl1
lrrc61.L				aldh4a1.L
lhb.L				mcm10.L
foxa1.L				nudt9.L
anxa9.L				ubtd1.S
rtbdn.S				tsc22d3.L
niban2				kmt2c.S
krt17.S				abhd13.L
bbs4.S				rps12.L
loc100492168.L				kdm6b.S
tmem229bl.L				rfx1.L
clock.S				adam9.S
usp2.L				arid3a.S
inpp1.L				ndufa8.L
gbx2.1.L				lmln.L
ano10l.L				sec22a.S
tm2d3.L				hao2.L
eps8l2.L				lnx1.L
cfap161.L				fundc1.L
ccdc87				accs.L
LOC108707795				sdf2l1.L
parm1				ist1
glipr2.S				fkbp9.L
stx3.L				znf593.L
fut4				med13l.L
arpc1a				c22orf39.L
adcy9.L				kiaa1147.L
dlx2.L				ghitm.S
lrrc36.L				rapgef1.L
Xelaev18031009m				nat9.S
cfap45.S				phf20l1.L
fut2.L				tsen2.L
egfr.L				rpl19.L
c1orf158.L				rtcb.L
ccp110.S				m6pr.L
krt12.L				copb1.L
loc100216141.L				cxcr4.S
tmem181.L				rsbn1l.S
esrra.L				col18a1.L
mboat1.S				spcs1
katnal1.L				ttc7b.S
tnk2.S				stim1
wdr38.L				hdlbp.S
cdc14a.L				march6.L
six3.L				cep83.L
fbxw9.S				nkrf.S
hmha1.S				wwc2.S
adgrf1.L				rap2b.S
Xetrov90020413m.S				necap1.L
anxa11.L				tp53bp2.S
hid1.L				cops5.S
ccn2				golph3l.L
nkx2-3.L				rab6a.L
trim13.L				net1.S
march10.L				ankrd50
ccdc24.L				cldn4.S
wrap73.L				ncor1.S
ttc6.L				rpl39.S
rfk.S
LOC108709811
ggt6
map9.L
wdr63.L
usp2.S
prr18.S
armc3.L
rab37.L
plxna2.S
lrrc46
ahnak
fzd10.L
itpkb
ccdc191.L
dzank1.L
cdc14a.S
ppp4r4.L
zfpm1.S
LOC100486385.L
syt13
eps8l1.S
alg11.L
c17orf98
kctd9.L
dnah10.L
tmem53.L
iqca1.L
kif27
vsig8.L
stkld1.L
pcdh10.L
styk1.L
invs.S
sytl1.S
slco4c1.L
cep350
lrrc9.L
ankrd66
saxo2.L
Xelaev18000198m
fam160a1.S
LOC108704529
esrra.S
adam9
sept8.S
gjb1.L
sgsm3.L
cfap57.L
ccdc108.L
ccdc60.L
ccdc27.S
casc1.L
rab3d.S
inf2
plekha6.S
sh3rf1.L
LOC108709394
gdpd1.L
b4galnt3.S
hsbp1l1.S
atp11c.L
cfap206.L
pcdh8.2.S
LOC108710961
cgrrf1.L
LOC108699634
krt18
ccdc113.L
pde9a.L
rab27a.S
LOC108705949
fbxo43.L
cep295.S
cfap157.L
zdhhc1.L
igsf9b.L
ccdc173.L
xk81a1.L
sidt1.L
heg1.L
ca12.L
strc
reps2.L
creb3l1
fjx1.S
ribc1
tbc1d24.2.S
tmem150a
robo2
efhc1.L
foxl2.L
LOC108698173
scnn1g.S
ccdc151.L
krt18.3.S
speg
greb1.L
LOC108705105
b9d2.L
samd15.L
cetn4.L
vill.S
loc100494782.L
foxn4.S
eps8l1.L
hook1.L
st3gal4.L
arhgap27.S
Xelaev18037285m
LOC108704696
nipal2.S
c1galt1.S
furin.L
cfap100.L
xrra1.L
hexd
asb13.L
slc25a22.L
kiaa1217.S
edem1.S
efcab2.L
Xelaev18037313m
fzd10.S
bcat1.L
lrrc71.L
nav1.L
drc7
rab25.L
ptk2b.S
sytl2.L
ttll5.L
rnf152
bmpr2.L
meis3.L
Xelaev18028823m
atp2a3.L
alms1.L
slc16a12.L
rbbp8nl.S
tctex1d1.S
ndel1.S
trappc4.S
errfi1.S
tmem87b.L
tacc2.L
fbn3.S
mfsd6.S
gpd1.L
chl1
fam183b.L
gmppb.S
kcne5.S
kndc1.L
rabl2b.S
stoml1.L
prdx4.L
cfap44.L
plekha8.L
atp6v1g3.L
sgk3.S
sptssb
sdpr.S
LOC108712926
abcg2.L
hoxa1.L
ephb2.S
sgms1.L
elk4.S
ctbs.S
hspa5
ttc39a.L
cog1.S
foxq1.L
Xelaev18004144m
glo1.S
c9orf116.S
tnk2.L
slc30a10.L
cfap126.L
ppp1r3c.1.L
dixdc1.L
MGC52899
h1f0.S
foxj1.2.L
galnt6.3.L
dspp
sgk2.L
fam227a.L
c1galt1c1.L
txndc11.L
myo1e
ccdc40.S
mycbp.S
nxpe3
mgst1.L
bbs12.L
gby.L
usf1
zbbx.L
fam126b
Xelaev18028374m
golga3.S
hoxa11.S
galnt6.1.S
plekhg5.S
hk2.S
rab15.L
bmp7.1.S
mmp11.S
atf7ip.S
nek6
gcnt4
zdhhc9.L
rab34.S
trabd.S
tctex1d1.L
MGC75872.S
pih1d3.L
kmt2c.L
gmppa.L
lmo4.1.L
atp6ap1.1.S
gnpnat1.L
fam83e.S
efcab7.L
nhsl1
slc35c2.S
itgb3.L
jun.L
chsy1.S
lrmp.L
isl1.L
b3gnt7.S
bnip1.L
mkl1.L
zdhhc2
nefm.L
tekt1.L
elk4.L
ccdc103
tab2.L
sowaha.S
ankrd22.S
pih1d1.L
sytl5.S
plcb4.S
drc3.L
slc8b1.L
dnah5
pacrgl.L
sigirr.S
cyth2.L
stpg4
sertad4.S
rnf149.S
tctn3.L
sytl2.S
ccdc157
csta
Xelaev18003283m
dedd2.S
crybg3.S
MGC83023
tbcel.L
nfat5.L
rarres1.L
znf703.L
chpf.S
tp73.L
rab19.L
c4orf47.L
dnai2.S
mcm5.S
aadacl4.S
galnt4.L
capn13.L
phlda2
klhdc8a.S
prr5.L
fa2h.L
cep76.L
chn1.L
golgb1.L
Xelaev18028825m
arhgef28.S
enkur.L
MGC83169
amot.S
fbxo16.L
per2.L
Xelaev18025028m
kif3b
tstd1.S
smtnl1
nkd1.L
atp7b.L
farp2.L
rnf43.S
LOC108714578
capn1.L
camkk2.S
bsn.S
gcnt1.S
ehd4.L
tctn2.L
tanc2
maats1
ern2.L
sh3d21.S
znf474.S
xk.L
zmynd10.L
vsig10.L
cfap58
LOC108699297
pdk3.L
adgrf5
lgalsl.S
LOC108711247
arntl.L
nrbp2.L
MGC154492
slc35a3.2.S
s100a2
ypel2.L
arid3a
poc5.L
sp7.S
nfe2l3.L
nrdc.L
csrnp2.L
ifngr2.1.L
MGC68910
ankef1.L
slc16a9.L
col16a1
abcb5
cep135.L
LOC108717899
degs3.S
cdk20.L
galnt6
nfe2l3.S
meioc
nr6a1.S
nipa2.S
ccdc14
fblim1.S
mfsd6l.L
LOC108704226
LOC108701745
hk1.L
amotl2.S
creb3l4.L
ascl1.L
pik3ca.S
samd12
poc1a.L
zfand2b.S
LOC108704569
nek5.L
spef2.L
tchh
kiaa0556.L
arl6ip1.S
nfkb2.L
rnf145l.L
arfip2
gmpr2.S
cpt1a.L
LOC108705534
nfe2l2.L
dnaaf3.L
nipal3.L
cib1.S
snx33.L
LOC108698123
bbip1.L
jun.S
ift46.L
ptprn.S
ankdd1b.L
map4k3.L
dnali1.S
pgm3.L
tmcc1.S
bbs1.L
fbxo46.L
xepsin.L
tbccd1.L
vtcn1.L
rgs12.L
map3k10.L
fam3d.S
cntrob
col1a2.L
s100g
sipa1l3.L
efcab1.S
fam3a.L
mfhas1
tubb4b.S
fam83f.L
mid1ip1.S
styk1.S
specc1l
pick1.S
slc4a1.S
plpp5.L
mob2.2.L
capn8.1.S
angpt4.S
gne.S
cep170b.S
ganab.L
thbs1.L
snai1.S
slc9a3r2.S
cenpj.L
tbx3.L
caskin2.S
rsph6a.L
bmpr2.S
bace2.L
fam83h.S
rab3a.S
fam20b.S
miip.L
hid1.S
clcn5.L
ankrd24.L
camk2g.L
cfap20.S
dydc1.L
stard3.L
kcnj15.L
comt.L
pik3r2.S
adck1.L
Xelaev18013479m
krt16.L
mfsd6l.S
muc3a
ccdc96.S
MGC52622
slc30a7.S
depdc7.S
sphk1.L
arhgap27.L
ago3
loc734020.L
dhcr7.S
mapk15.L
mdk.S
LOC108697646
cxcl16.L
post.L
Xelaev18019738m
ralgps1.S
retsat.L
smpd1.L
fam160a1.L
cebpd.L
spata6l.L
cfap45.L
ptpn23.S
LOC108701166
c18orf54.S
heatr6.S
gk.S
golph3l.S
tll1.S
itfg1.S
trpm5.L
MGC154819
ccdc149.S
unc50.L
golga3.L
MGC131348
esrp1.S
LOC108706721
rhof.L
baz2b.L
tlcd2.S
ptbp3.L
MGC98819
post7p.L
rxra.S
cdkl2.L
edem3.S
post10.L
endod1.L
tuba1cl.2.S
tmem218.L
spsb3
LOC108704568
tmem63a.L
atp13a2.L
slc6a7
slc10a3.S
LOC108702892
trpv6.L
mfsd14a.S
foxn4.L
c19orf44.L
ndufa8.S
dhcr7.L
flrt2.L
post5.S
krt8.S
Xelaev18038969m
raver2.S
rab8b.L
epn3.L
ralgapb.L
syne3.L
lpcat1.S
deaf1.L
bnip2
tbc1d15.S
ube3a.L
higd1a.L
paqr5.S
bean1.L
ppp1r18
elovl3.S
gosr2.L
etnk1.L
dnaaf1.S
elmsan1.L
c21orf59.S
tfcp2.L
cep70.L
capns1.L
efnb2.L
man2a1.L
ncoa2.L
npdc1.1.S
gopc.S
tm9sf2.L
rsph9.L
fam63a.S
trim68
ubp1.L
gata6.S
kdm7a.S
zbtb46.L
macc1.L
stil.L
gas8.S
tmem200c.S
sphk2.L
ncor2
dnaaf5.S
dnai1.L
chmp4c.L
sorcs1.S
cep350.S
nme9.L
MGC81163
yipf4.L
meis2
dab2ip.L
gmppb.L
gcm1.L
ift52.L
LOC108695829
yipf4.S
pear1.L
ptprz1.L
golga1.L
slc35a2.L
galnt7.L
ccm2.S
leprotl1.S
slc4a11.L
sec22b.L
rfx1.S
tmprss4.L
dusp8.S
arap1
ndfip2.S
gm39120
abcd1.L
zfand4.S
fbxo15.S
nlrc4.L
tspan13.S
pcdh7.S
cdk7.L
amotl2.L
chpf.L
trim8
iqsec2.L
mbd6.S
stim1.S
cfap52.L
tfcp2l1.S
capns2.S
zbtb46.S
socs5.S
tmem259.L
pknox1.S
ttc41
nme5.L
mgat1.L
hs3st3a1.L
dlx1
1700030j22rik
LOC108713208
colgalt1.L
usp21
rab15.S
slc6a16.S
apeh.L
stard10.L
pik3r1.S
ngfr.S
ano9.L
brca2.L
tmem183a.L
kcnk1.S
yif1b.L
vangl1.S
lrrcc1.L
slc16a6.L
flii.L
ccdc130.L
lrtomt.S
nipal4.L
slc16a6.S
MGC82342
trim45.L
gigyf2.S
ywhah.S
dmxl1.L
sh3d21.L
faim.S
g67.L
kif24.L
sipa1l3.S
sun1.L
uckl1.S
tbx3.S
rest.S
fer1l4
loc100497729.L
abhd13.S
bcar1.L
tmem238.S
tmem168.S
kiaa1324.S
atp1b2.S
ergic2.L
purg.L
cspp1.L
LOC100486385.S
ubl3
prkca.S
LOC108700400
c2cd3.S
ribc2.L
spag8
fry.L
ap1b1.L
rbm47.L
pi4k2a.L
bmp7.1.L
btg3.L
slain2.L
fzd8.S
ift20.L
irak1bp1.S
smad9.S
map3k2.L
ccno.S
lig4.L
ccdc112.L
bbs7.L
slc35f5.L
slc44a3.L
tbx2.S
rbm23.L
rnf115.S
c8g.S
cltc.L
rnft1.L
gpr160.L
smim7.S
slc30a5.S
katnb1.L
c3orf14.L
ly6g6c.L
eef1a1o.L
zbtb7b.S
LOC108696555
Xelaev18040914m
entpd4.S
elmsan1.S
mypop.L
atf7.L
wdr31.L
LOC108704672
slc50a1.L
det1.L
calr
cfap77
clcnkb
dnajc3.L
npdc1.1.L
MGC68448
ydjc.L
spryd3.L
reep4.L
mars2
msx1.L
prpf39
nr2f6
bbs5.L
LOC108704278
acbd3.L
tnrc6b.L
sik1.S
szl.L
ube2n.S
nfe2l1.S
mgat4a.S
pidd1.L
ganc.L
fam174b.L
prkar1a.S
tmem238
fam174b.S
Xelaev18000128m
zbtb21.S
dera.S
rab11a.S
mns1.L
mycbp.L
tdg.S
rundc1.S
kdf1.L
ncoa1.S
prelid1.S
tfcp2l1.L
adipor2.S
rnf44.L
tnrc6b.S
ddost.S
cep350.L
dnaaf2.L
vwa5a.L
pcdh1.L
endod1.S
MGC82989
itpr2
kiaa0753.S
c5orf15.S
rassf6.S
hipk1.S
chmp1b.L
tbc1d25.S
Xelaev18000401m
dnajb5.L
mpzl1.S
tll1-like.1.L
wdr13.L
tmco3.L
nfe2l1.L
stk36.L
tmed1.L
kiaa0141.S
ncor1.L
rps21
rhbdf2.L
tax1bp3.S
LOC108719340
rps3a.L
mpp5.L
wwtr1.L
rpl27a.S
MGC84460
hes1.L
hmgcl.S
katnal2.L
degs1.L
pknox1.L
derl1
aldh4a1.L
mcm10.L
nudt9.L
ubtd1.S
tsc22d3.L
kmt2c.S
abhd13.L
rps12.L
kdm6b.S
rfx1.L
adam9.S
arid3a.S
ndufa8.L
lmln.L
sec22a.S
hao2.L
lnx1.L
fundc1.L
accs.L
sdf2l1.L
[truncated: 37 more rows]
