# Supplementary material for: Quantitative analysis of transcriptome dynamics provides novel insights into developmental state transitions
Source: BMC Genomics. 2022 Oct 23;23:723. doi: 10.1186/s12864-022-08953-3 (PMC9588240; doi:10.1186/s12864-022-08953-3)
Supplement: Supplementary file 17 — Additional file 17. Supplemental Table 8. List of all genes differnetially expressed between epidermal and neural lineages and their Log2 Fold Change and pvalue corresponding with Fig. 3D, genes differentially expressed between endoderm and and mesoderm lineages and their Log2 Fold Change and pvalue corresponding with Fig. 6A, and genes differentially expressed between epidermis and and mesoderm lineages and their Log2 Fold Change and pvalue corresponding with Fig. 7A. [file 12864_2022_8953_MOESM17_ESM.xlsx]

## Sheet: Epi-Neur
List of all genes differnetially expressed between epidermal and neural lineages and their Log2 Fold Change and pvalue corresponding with figure 3D
Transcription Factors in bold and and percentage TF calculated at bottom of each gene name column. Positive Log2FC genes are higher in neur, negative Log2FC genes are higher in epi.
Gene name_Epi-Neur_st10	log2FoldChange_Epi-Neur_st10	padj_Epi-Neur_st10	Gene Name_Epi-Neur_st10.5	log2FoldChange_Epi-Neur_st10.5	padj_EpiNeurst10.5	Gene Name_Epi-Neur_st11	log2FoldChange_Epi-Neur_st11	padj_Epi-Neur_st11	Gene Name_Epi-Neur_st12	log2FoldChange_Epi-Neur_st12	padj_Epi-Neur_st12	Gene Name_Epi-Neur_st13	log2FoldChange_Epi-Neur_st13	padj_Epi-Neur_st13
ubxn8.L	9.53702	0.0378101	retn.1.S	9.60318	0.0090437	Xetrov90022200m.S	8.74524	0.00807986	Xelaev18002981m	12.2696	4.77e-07	lrat.S	10.1696	0.00427521
Xelaev18002981m	9.30723	7.10838e-36	Xelaev18002981m	9.38742	3.2e-24	Xetrov90013256m.L	8.73539	4.91923e-07	retn.1.S	8.92639	0.00127284	lhx2.S	10.0612	5.32e-10
plscr2	8.24241	0.013597	agmo.L	8.3232	4.2e-05	LOC108718650	8.53703	1.67594e-08	hoxd13.S	8.84674	5.24e-10	chrd.2.L	9.82533	5.18e-09
deptor	7.5285	0.00770473	fip1l1	7.39982	0.00552449	Xelaev18002981m	8.4457	5.55992e-05	neurod1.S	8.30857	3.49e-08	rax.S	9.76631	0.00195578
alg11.S	7.37155	0.00545223	LOC108703070	7.12787	0.00241213	LOC108707433	8.16248	1.99878e-07	pcdh8l.S	8.13334	2.67e-08	zic4.L	9.66582	2.18e-10
Xelaev18002331m	7.10825	8.70411e-05	plscr2	6.8249	0.000657515	plscr2	8.10747	4.46056e-11	foxd4l1.1.L	8.10301	5.03e-47	angptl4.L	9.58218	0.00194684
ptprt.S	7.03532	0.0185956	LOC108698997	6.52455	0.00956514	deptorl.L	7.95172	9.11775e-05	LOC108704572	8.01588	3e-07	foxd4l1.1.S	9.54177	6.58e-19
Xelaev18010303m	7.01869	0.00101695	Xelaev18010736m	6.48771	0.00548739	agmo.L	7.687	0.00013579	Xelaev18021497m	7.97068	9.88e-07	pax3.S	9.4252	9.7e-21
lipc.S	7.01254	0.000130655	lipc.S	6.42527	0.000775564	Xetrov90021942m.S	7.61167	2.27019e-05	irx4.L	7.93514	3.83e-06	Xelaev18002981m	9.40655	2.59e-16
Xelaev18033579m	6.95732	0.00258916	deptorl.L	6.34474	0.00564179	Xelaev18036935m	7.44755	9.17461e-06	hoxd9.L	7.6256	2.26e-07	cxorf21.S	9.20772	0.00167094
LOC108705792	6.83675	1.41252e-44	LOC108705792	6.3026	1.17e-49	inpp5e	7.32947	6.37397e-24	LOC108709840	7.5993	6.36e-05	hoxd10.L	8.97594	7.89e-07
Xelaev18015684m	6.76238	0.0138367	Xelaev18029838m	6.28476	0.00174739	LOC101734605.L	7.23964	2.81321e-05	Xelaev18047926m	7.59357	1.14e-05	rgs20.S	8.92601	4.27e-06
npff.S	6.74299	0.00501605	Xelaev18010303m	6.19104	0.0180199	Xetrov90022198m.S	7.07743	0.00319863	tnxb	7.58833	2.19e-06	cttnbp2.S	8.86042	4.05e-09
LOC108707880	6.61504	0.0203384	deptor	6.09533	0.0362066	Xelaev18033505m	7.00642	0.00225313	foxa4.L	7.49491	1.15e-09	hoxd13.L	8.74275	4.6e-06
btg5.1.S	6.42781	3.93611e-07	Xelaev18036935m	6.03958	0.0180532	LOC108703070	6.92156	0.00231488	apold1.S	7.48266	3.37e-07	foxb1.L	8.71044	4.67e-08
alpk3.S	6.2507	0.0306658	srl.L	5.98301	0.0460768	LOC108705792	6.80177	2.70493e-10	nr2e1.L	7.4275	4.59e-06	LOC108718650	8.60577	0.000703767
LOC108712652	6.2335	0.0303218	inpp5e	5.97143	4.67e-10	Xetrov90010127m.L	6.7188	0.0003415	Xetrov90013256m.L	7.40258	3.09e-05	umod.3.L	8.55002	1.32e-05
LOC108716953	6.16662	0.0397373	padi4	5.96647	2.56e-06	foxd4l1.1.L	6.63711	1.13769e-37	hoxd11.L	7.39278	6.84e-06	pou4f1	8.53794	2.38e-06
mettl24.L	6.07621	0.00601635	Xelaev18030343m	5.87271	0.00113531	actc1.L	6.57241	0.0023595	hoxc3.L	7.38624	1.7e-05	gsc.L	8.49673	2.84e-07
inpp5e	5.87282	1.788e-06	cyp2d6.S	5.79872	2.57e-09	retn.1.S	6.55372	0.000385628	pcsk9.L	7.3232	1.14e-05	pkdcc.2.L	8.38681	8.54e-05
rax2.S	5.70193	0.0231671	LOC108716758	5.67076	0.0393573	btg5.1.S	6.48101	0.00143945	rrad.S	7.22684	0.000166607	zic4.S	8.29671	1.75e-18
strip2.L	5.60227	1.30681e-22	Xelaev18004526m	5.63187	0.0101355	kcnip2.S	6.46251	0.00540717	inpp5e	7.20733	2.82e-12	dis3l	8.27541	3.09e-06
LOC108700601	5.54732	7.88088e-10	strip2.L	5.61337	3.17e-15	foxd3.S	6.45939	6.67823e-08	actc1.S	7.19725	3.03e-08	mmp9.L	8.17313	0.0410419
Xelaev18010736m	5.53112	0.0394019	Xelaev18030422m	5.573	0.0216845	cyp2d6.S	6.39244	7.52448e-09	mmp1.S	7.15553	3.05e-05	fosl1.L	8.1656	0.00298585
stab2.L	5.47291	0.0397373	Xelaev18042807m	5.39687	0.0263119	LOC108705085	6.34673	0.00221692	Xelaev18002964m	7.13527	3.73e-06	hoxd13.S	8.15569	2.21e-05
padi4	5.39889	0.00709274	alpk3.S	5.34541	0.00994348	slco1c1.L	6.29876	0.00642387	pcdh8l.L	7.12796	1.51e-10	LOC108709840	8.107	5.98e-05
begain	5.36234	0.0221521	Xelaev18032521m	5.29619	0.0293428	Xetrov90019340m.S	6.27626	9.72191e-08	foxd3.L	7.10198	2.02e-14	LOC108711579	8.0098	5.71e-05
cerkl.L	5.3364	0.0483954	Xetrov90010127m.L	5.23301	0.0356471	Xelaev18042807m	6.19376	0.00478228	LOC108705792	7.095	2.9e-25	pax3.L	7.94874	2.57e-18
Xelaev18032625m	4.98521	0.000527024	btg5.1.S	4.97018	0.015634	sgcz.L	6.18192	0.00624527	fosl1.L	7.06748	1.21e-08	wnt16.S	7.94542	2.95e-05
Xelaev18003284m	4.96412	0.00302847	LOC108700601	4.81484	2.29e-07	Xelaev18003991m	6.14423	0.00515535	serpine1.S	7.04982	7.2e-05	wnt7a	7.92952	0.0035762
Xelaev18004526m	4.94554	0.0203384	Xelaev18002331m	4.81274	0.00233787	Xelaev18013747m	6.13607	0.011895	fosb.L	7.00245	7.74e-06	retn.1.S	7.91194	0.045624
adgrg2.S	4.88563	0.000396856	adgrg2.S	4.7758	0.00564179	Xelaev18004215m	6.13422	0.0113242	tns4.L	6.98067	2.65e-05	foxd4l1.1.L	7.90029	2.47e-15
Xelaev18003069m	4.76045	0.000441685	Xelaev18044133m	4.77402	0.0266834	tbx18	6.11343	0.00905493	LOC108707433	6.97542	1.01e-05	zic5.S	7.88294	2.28e-07
Xelaev18000418m	4.69968	0.000427205	hsd11b1.L	4.58667	0.000642079	bsnd.L	6.11072	0.00627377	mmp9.L	6.94374	4.19e-05	chrd	7.80219	2.58e-05
Xelaev18042807m	4.66033	0.00129909	Xelaev18001463m	4.47246	0.0101515	gngt2.1.S	6.10476	0.0497479	plscr2	6.92855	0.000152446	hoxc3.L	7.74082	0.0193275
Xetrov90009976m.L	4.58612	7.77797e-18	Xetrov90026252m.L	4.40912	0.0268829	akr1c8p.S	6.10142	0.0313577	Xelaev18036935m	6.89917	0.000268535	ampd3.S	7.73181	3.08e-08
LOC108710811	4.56268	1.85514e-27	LOC108705667	4.28864	0.0104124	Xetrov90022086m.S	6.07527	0.00435554	loc100485537.L	6.89236	6.25e-05	tmem204.L	7.61675	0.000411647
cyp2d6.S	4.45695	0.000248744	slk.L	4.27732	0.0260148	pcdh8l.S	6.03463	9.87981e-16	zic3.L	6.87426	8.14e-38	crx.L	7.60531	2.55e-16
tRNA-Ser	4.40056	8.68545e-09	jun.L	4.22197	3.3e-29	ubxn8.L	6.02652	0.0175103	hoxb4.S	6.87374	0.00018295	serpine1.S	7.58615	0.00043712
Xelaev18030343m	4.08179	0.00328283	Xelaev18003069m	4.1297	0.000178415	Xelaev18010303m	6.02161	0.00938908	umod.3.L	6.86603	7.77e-06	LOC108696783	7.54373	0.0215321
b3gat2.S	4.0668	0.00755426	LOC108703378	4.10343	0.0284459	Xelaev18025534m	5.93977	0.0144566	ctss.L	6.82608	0.000398718	gdf10.L	7.47357	4.78e-05
jun.L	4.05717	1.45405e-25	LOC108712652	3.97631	0.0448033	Xelaev18040602m	5.8904	0.0202082	foxd4l1.1.S	6.7803	3.91e-41	slc1a1.S	7.4309	0.000108779
Xelaev18014725m	3.97102	0.0173475	tRNA-Ser	3.96091	2.02e-06	LOC108716758	5.87521	0.0279011	Xelaev18011349m	6.68341	0.000250636	prdm14.S	7.39784	2.34e-15
gpr22.S	3.95299	0.00601635	loc100485537.L	3.93024	0.0431389	hsd17b7.L	5.85835	0.00354568	actc1.L	6.66715	0.000484741	lhx3.S	7.39343	0.000177572
glb1.L	3.94554	0.0447024	Xelaev18000418m	3.92487	0.00323029	Xelaev18003019m	5.81907	0.00335691	foxd3.S	6.66318	3.76e-11	eomes.S	7.35908	0.000195462
fibcd1.L	3.9313	0.0381163	LOC108710811	3.90627	7.28e-15	LOC108705752	5.81757	0.0411294	plekho1.S	6.61125	3.59e-05	foxd2.S	7.33957	0.00166903
Xelaev18002109m	3.8896	1.82895e-05	Xelaev18000723m	3.90564	0.0104928	deptor	5.80768	0.0130559	angptl4.L	6.59453	1.15e-12	cldn5.L	7.32698	9.59e-08
cnbd2.L	3.81599	0.000527024	jun.S	3.90302	1.04e-23	cd209e	5.79145	0.00254874	LOC108718650	6.57607	4.15e-10	LOC108705792	7.31399	5.29e-15
Xelaev18034569m	3.78898	0.0253908	actc1.S	3.90098	2.99e-05	actc1.S	5.78146	3.88908e-06	LOC108708771	6.56647	0.000527045	obp.S	7.28811	0.00329407
jun.S	3.73929	7.0016e-28	Xelaev18003284m	3.86354	0.000264587	ldb2	5.77645	0.0175036	ubxn8.L	6.56202	8.54e-05	kcnj1.L	7.28685	0.000564681
ldlrad1.L	3.6423	0.0206725	Xelaev18014725m	3.86294	0.000699459	bglap.S	5.77348	0.019977	hoxb1.S	6.55809	0.00109862	nr4a2.S	7.24061	1.83e-07
Xelaev18002449m	3.62398	0.000597432	Xelaev18002160m	3.79729	0.0460768	irx3.S	5.76101	3.89833e-15	frmpd1.L	6.52675	0.0012944	znfx1.L	7.23813	0.0110668
steap4.L	3.58305	0.00482829	f13a1.L	3.75945	0.00568685	ca14	5.72934	0.00309642	foxd4l1.2.L	6.47688	5.82e-14	tmem116.S	7.19798	7.59e-05
tRNA-Gln	3.49112	0.00538581	fibcd1.L	3.75728	0.00017071	socs3.L	5.72406	5.75027e-06	akr1c8p.S	6.42726	0.00391186	irx3.L	7.17853	8.26e-10
henmt1.L	3.489	1.70693e-10	Xelaev18002109m	3.68496	0.00109201	apcdd1l.S	5.7029	0.00515535	rsad2.L	6.41174	0.000567294	actc1.S	7.1744	0.000262078
cacna1s.S	3.42654	0.0341983	ass1.S	3.68218	0.0492338	Xelaev18018555m	5.67989	0.00118151	c1qtnf9b.L	6.38932	0.000972288	pik3r5.L	7.14962	0.000253882
txnip.S	3.35316	6.08629e-12	palmd.S	3.64979	0.0117625	LOC108707137	5.65108	0.0338929	LOC108705667	6.38571	6.25e-06	ldlrad4.L	7.13429	0.00189093
egr4.L	3.33663	3.18324e-05	stoml3	3.64899	0.000694464	icam3	5.6402	0.0100931	rora.L	6.35568	0.000831307	olig4.L	7.11418	0.000696503
tnn.L	3.31336	0.0498064	Xelaev18032753m	3.62544	0.0384202	LOC108705527	5.61611	0.00669772	flt1.S	6.34552	0.000195143	zic3.L	7.10932	6.1e-44
rab11fip4	3.31103	0.000258198	tnn.L	3.5743	0.0106426	prdm8.L	5.59271	0.0423329	fezf2.S	6.34317	0.000155548	bmpr1b.S	7.10869	7.26e-15
comt.S	3.27277	0.001055	Xelaev18040367m	3.56024	0.00113531	Xelaev18032625m	5.54805	0.00624983	il1b.S	6.32778	0.00318559	cldn3.L	7.09001	0.000596045
Xelaev18040367m	3.25001	0.035536	ldlrad1.L	3.5582	0.0137997	slco1b3.L	5.54526	0.0386701	igfbp1.L	6.3176	0.00204399	hesx1.S	7.01429	0.000480507
palmd.S	3.05054	0.0143819	hoxd9.L	3.50285	0.011526	Xetrov90026252m.L	5.51557	0.00885895	irx3.S	6.31437	2.04e-14	pak1	6.97284	0.000583193
farsb.S	3.0283	0.018547	egr1.L	3.47843	3.17e-14	jun.S	5.4325	2.18788e-34	hoxd13.L	6.29669	4.57e-06	deptorl.L	6.96722	0.00298324
igsf6	2.97663	0.0019699	shox2	3.4561	0.0236214	Xelaev18033579m	5.42239	0.010221	fezf1.L	6.2799	0.000146562	hoxd9.L	6.9254	0.00254526
Xelaev18000723m	2.90416	0.0321855	jund.S	3.45449	5.36e-34	ugt3a2.L	5.41666	0.00811462	hoxd10.L	6.25216	1.04e-12	Xetrov90021032m.L	6.91593	0.000521612
c8orf34.S	2.89804	0.00244021	Xelaev18040117m	3.42821	0.00983643	Xelaev18030422m	5.4104	0.00905493	tbx18	6.23908	0.00391193	wnt7a.S	6.8936	4.97e-06
serpinb4.L	2.86977	9.7006e-05	tgm2-a	3.42385	0.0280683	strip2.L	5.38394	2.04382e-11	kcnb2	6.22543	0.000167761	foxd4l1.2.L	6.86214	7.24e-08
loc100494782.L	2.8238	0.000332907	fosl1.L	3.3801	0.0149533	LOC108711579	5.36808	9.32843e-27	csnka2ip	6.21756	0.00153723	Xelaev18032521m	6.84021	0.000434023
hes5.2.L	2.75938	0.00157216	unc13d.L	3.32998	2.54e-05	LOC108703378	5.34157	0.000610147	Xetrov90022200m.S	6.2145	0.00218233	LOC108717076	6.83291	0.000304748
MGC84224	2.75184	0.0390015	steap4.L	3.31935	0.00548121	foxd3.L	5.32727	4.52635e-10	wnt7a.S	6.20605	4.69e-16	shisa2.S	6.82707	0.00106446
ccdc80	2.71548	0.010221	actc1.L	3.31779	0.00770538	apold1.S	5.31418	3.33389e-13	Xelaev18027742m	6.1799	2.76e-05	il1b.S	6.80952	0.00407959
LOC108716750	2.70842	0.039349	tRNA-Gln	3.31261	0.0288548	Xelaev18000418m	5.31043	3.99234e-05	car1_predicted.S	6.17682	0.00177958	chrd.L	6.80264	2.2e-13
Xelaev18003735m	2.67117	0.00566189	pcdh8l.L	3.28987	3.46e-06	Xetrov90018873m.S	5.2373	0.00839072	Xetrov90028960m.L	6.17463	0.00170627	foxd3.S	6.79894	7.93e-05
Xelaev18030795m	2.62697	0.00457299	rasgrp2.L	3.26523	0.000446196	LOC108701268	5.22691	0.0167849	Xetrov90010127m.L	6.14925	0.00558853	LOC108719272	6.77926	0.00442084
inppl1	2.52026	0.0213916	pcdh8l.S	3.21539	8.44e-06	fosl1.L	5.18927	0.000148485	MGC82209	6.14264	0.0233312	MGC82209	6.76633	0.0129325
Xelaev18036077m	2.48427	0.0368143	LOC101734605.L	3.19898	0.0101711	LOC108705667	5.1672	2.04564e-05	LOC108718455	6.13025	0.00291392	LOC108705667	6.75721	0.000855383
LOC108705899	2.48098	0.0019699	Xelaev18003991m	3.19549	0.0403746	nceh1.S	5.15898	0.035603	pgs1.L	6.12503	7.29e-06	tox.L	6.75036	0.00453344
MGC115316	2.41549	1.78778e-05	cndp2	3.17355	0.000676734	Xelaev18002160m	5.14652	0.000378234	cbarp.S	6.10441	1.47e-15	zic1.L	6.73077	3.43e-25
egr1.L	2.39657	5.20616e-05	trnaq-uug	3.16722	0.0117625	tpm2.S	5.09304	0.00122858	foxp2.S	6.10237	0.00713457	Xelaev18028625m	6.72151	0.013723
Xelaev18046094m	2.38686	0.0297944	irx4.L	3.15529	0.0340181	ambra1.L	5.08029	0.0451409	Xelaev18000190m	6.08536	8.36e-05	lhx2.L	6.72144	0.00110195
bmpr1b.S	2.36253	0.00819411	Xelaev18040124m	3.14986	0.0462948	pth1r.S	5.07043	0.0347602	Xelaev18009383m	6.07858	0.0027156	foxb1.S	6.70149	8.66e-06
btg2.S	2.34742	3.29349e-09	c8orf34.S	3.14809	0.000240817	LOC108719039	5.05637	0.0342965	Xelaev18042907m	6.06887	0.00048307	loc100485537.L	6.69921	0.00469625
cluh	2.34697	0.0441572	foxd4l1.1.L	3.10819	1.07e-16	hoxb3.S	5.05039	0.00155878	pla1a.L	6.06766	0.00728676	pax5	6.69839	2.63e-05
fos.S	2.33485	3.34059e-12	egr4.L	3.10767	1.97e-07	megf6.S	5.04545	0.0382937	foxb1.S	6.06512	7.05e-08	Xelaev18010303m	6.68722	0.00117315
hes1.S	2.31174	0.0107583	fos.S	3.10725	6.14e-19	Xetrov90009976m.L	5.0262	2.32043e-05	Xelaev18010303m	6.06011	0.00464333	rgs2.S	6.68646	0.00503501
pbxip1.S	2.30334	0.0475803	ttc24.L	3.10212	0.0439812	Xelaev18004526m	5.01809	0.0307441	Xelaev18030343m	6.05106	0.00433169	lrrn4cl.L	6.6529	1.21e-05
txnip.L	2.26987	6.04711e-06	Xetrov90009976m.L	3.09657	0.000121099	hoxd9.L	5.01584	3.15857e-07	cyp27b1.S	6.01715	0.00382483	ccl19.S	6.64184	0.00393625
slc24a5.S	2.24714	0.0377584	vtn.L	3.0655	0.0307551	srl.L	4.96336	0.0157151	Xelaev18039035m	6.01479	0.00396565	LOC108713701	6.63198	0.00374173
slc5a1.2.L	2.21509	0.00545223	pah.S	3.05806	0.00152935	egr3.L	4.9434	7.86144e-05	fam150a.L	6.01412	0.00574444	LOC101734172.L	6.63083	0.00321809
sgk1.S	2.19481	3.1712e-12	fos.L	2.98545	3.78e-09	Xelaev18002964m	4.91993	0.000512929	Xetrov90000584m.1	6.01121	0.00184974	loc100492447.L	6.62997	0.00673637
LOC108706318	2.1815	4.62532e-10	rimkla.L	2.92935	0.00351381	LOC108714981	4.8669	0.0498104	ppp1r13l.S	6.00859	0.00997662	adprm.2.L	6.60384	0.0161641
egr2.L	2.15011	2.24319e-05	henmt1.L	2.9056	7.36e-06	tRNA-Ser	4.86093	2.87384e-11	gsc.L	6.00266	0.00049896	hes7.1.L	6.56585	1.04e-14
efs.S	2.05849	0.00249317	LOC108716747	2.90451	0.00445082	Xelaev18014725m	4.83329	2.20109e-05	sqle.S	5.99779	0.000466779	mmp9	6.56457	0.0437629
serpinh1.L	2.0416	0.000949283	Xelaev18003735m	2.89975	1.46e-08	ass1.S	4.77336	0.00121618	Xetrov90021032m.L	5.99311	0.000471078	nkx2-2.S	6.55548	0.0199269
fos.L	2.02596	8.35349e-05	txnip.S	2.88627	5.3e-22	Xelaev18002331m	4.75942	0.00794886	a2m.L	5.99236	0.0105778	Xetrov90003056m.L	6.55108	0.0305814
hist1h2aj.L	2.00512	0.000212599	Xelaev18046472m	2.88434	0.0460768	dbf4b	4.69382	0.0139029	crtap.S	5.98494	0.00602573	tfec	6.53702	1.49e-06
egr1.S	1.98946	0.038013	dusp8.L	2.88369	0.00666624	Xelaev18030343m	4.68024	0.00262728	LOC108701030	5.97398	0.00798903	LOC108698356	6.5364	0.00826823
sgk1.L	1.95631	1.36107e-07	igsf6	2.8768	0.0102547	abhd1.S	4.66215	0.0208925	Xelaev18006325m	5.96896	0.00150962	Xelaev18027742m	6.5205	0.00151237
LOC108704257	1.91513	0.0174401	Xelaev18002449m	2.87393	0.00109201	fosb.L	4.64693	1.15247e-06	speg.L	5.96876	0.00601284	pex5l.S	6.52012	0.003095
hes2.L	1.89558	0.00623495	LOC398451	2.85496	0.0181496	irx4.L	4.6286	6.62045e-08	tpm2.L	5.95596	2.28e-05	prom2.L	6.51705	0.000236232
ND5	1.86597	0.0081812	hes1.S	2.85256	1.02e-09	cbarp.S	4.62486	1.81196e-09	Xetrov90015502m.L	5.95545	0.016851	ugt3a2.L	6.50097	0.00611512
LOC108714507	1.86034	1.15099e-05	btg2.S	2.8476	5.34e-22	cebpb.S	4.60871	4.91062e-29	xirp1.S	5.94802	0.00620222	Xelaev18000358m	6.50043	0.00774799
pgm1.S	1.84277	4.80772e-08	ppp1r3c.1.S	2.81498	0.0347527	jun.L	4.60522	3.73861e-20	dis3l	5.94205	4.88e-11	hivep3.L	6.50042	0.00626836
junb.S	1.81354	0.00829044	foxd3.S	2.80819	0.000839333	sema3b.L	4.60399	0.00801618	Xelaev18000358m	5.93796	0.00752754	cyp1b1.L	6.49851	0.00348408
LOC108719883	1.72889	0.001874	npr2.S	2.79535	0.0129303	Xelaev18004208m	4.57194	0.0172752	pde4b.L	5.93703	0.00566005	inpp5e	6.49192	5.2e-05
mylip.L	1.66727	6.52958e-05	cebpb.S	2.79285	8.36e-09	gsc.L	4.56924	0.000196016	LOC108716758	5.93018	0.0289698	trex2	6.49137	0.0205062
hes5_X2.L	1.62525	0.00314476	comt.S	2.78521	0.00697762	Xelaev18000723m	4.54547	0.00634854	wnt16.L	5.92788	0.00488937	Xelaev18031878m	6.48935	0.00931337
Xelaev18035105m	1.6103	0.022924	cnbd2.L	2.76742	0.0083615	wnt16.S	4.54235	2.4454e-06	pnpla7.L	5.90252	0.00206722	Xelaev18008846m	6.48674	0.0316946
LOC108711579	1.59742	0.0372344	LOC108711579	2.7173	1.17e-09	LOC108697563	4.52697	0.0335864	LOC108704538	5.90122	0.000978854	gbp7.S	6.48671	0.0219454
LOC108699553	1.56393	0.0016151	irf7.L	2.70052	0.0332368	Xelaev18039587m	4.51874	0.0151684	nostrin.S	5.89989	0.00901066	Xelaev18000418m	6.48009	0.000809247
insm1.S	1.55366	7.18212e-05	hcn4	2.69105	0.00038909	hsd11b1.L	4.50139	0.000527893	pknox2.S	5.89205	0.00521572	crx.S	6.47179	1.98e-09
h2afj.L	1.54639	0.0401073	dnah1.L	2.68126	0.0111271	pdia2.S	4.49419	0.00696326	socs1.S	5.89109	2.57e-33	cd22	6.47089	0.00960004
hes1.L	1.52257	1.63494e-06	casd1.S	2.6418	0.0254373	slk.L	4.47044	0.000863708	LOC108704599	5.88653	0.0300242	muc1.S	6.46653	0.000199292
junb.L	1.51697	5.20616e-05	LOC108703938	2.64029	0.00564179	ctgf.L	4.46371	4.06148e-05	hoxb2.S	5.88221	0.0308502	zic2.L	6.44365	4.82e-23
hist1h4d.L	1.49007	0.00997837	cbarp.S	2.63608	0.0248254	Xelaev18031593m	4.41939	0.0443541	hnf1b.L	5.87514	0.0084289	mras.L	6.44194	5.56e-10
LOC108702848	1.47207	0.00375233	LOC101731668.S	2.63221	0.00811848	fip1l1	4.41893	0.0220737	ugt3a2.L	5.87134	0.0167315	Xelaev18003069m	6.43706	0.000741821
smad4.1.S	1.46763	1.15099e-05	mfap2.L	2.63197	0.024641	akap14.S	4.40947	0.0338929	Xelaev18030422m	5.86803	0.00516795	Xelaev18002160m	6.42127	3.71e-08
LOC108711538	1.4478	5.998e-14	apold1.S	2.62799	0.000227703	pcdh8l.L	4.408	0.00379683	hes3.L	5.85479	5.18e-07	onecut2.S	6.41844	0.0432118
hist1h3g.L	1.41598	0.000339482	mapk8ip1	2.62225	0.0237218	fos.S	4.40793	1.45032e-15	Xelaev18038081m	5.84431	0.00140024	nkx2-2.L	6.40969	0.0122318
mettl5.L	1.39939	0.0204419	LOC108696845	2.62075	0.0205249	Xelaev18009110m	4.39029	3.23298e-08	LOC108704894	5.82995	0.0059948	Xelaev18032753m	6.40501	0.000534277
adrb2.S	1.36397	0.0225843	farsb.S	2.60218	0.040314	LOC108700601	4.39004	3.6391e-06	kcne3.S	5.82824	0.00778567	cpn1.S	6.39857	1.5e-08
LOC108704568	1.3568	0.0108523	inppl1	2.59464	0.0193613	neurod2.L	4.38952	7.50342e-05	Xelaev18031878m	5.82672	0.00694836	foxa4.L	6.37966	0.00765336
Xelaev18041975m	1.34969	0.00195938	nr2e1.S	2.58333	0.0172291	loc100485537.L	4.35433	0.0105462	htr3b.L	5.81669	0.0017	dnajb1.S	6.36081	0.00411301
hist1h1t	1.34899	0.00826868	LOC108717933	2.5743	0.00706909	Xelaev18006366m	4.34732	0.0306822	Xelaev18000418m	5.81489	0.000536834	slc32a1.S	6.35722	7.73e-05
LOC108705673	1.3413	0.0023344	fosb.L	2.56431	0.00236723	socs3	4.33449	0.000414012	itga4.L	5.81331	0.0196082	fosl1.S	6.35598	1.57e-06
arrdc3.L	1.32416	0.0002394	hoxc13.L	2.55162	0.04256	egr4.L	4.30808	0.00262728	LOC108718550	5.801	0.00922176	clcn1.L	6.34886	0.0277955
arrdc3.S	1.3088	0.00315023	Xelaev18047274m	2.54292	0.0278251	fos.L	4.30678	4.2294e-05	Xetrov90022198m.S	5.79986	0.0383075	usp18.S	6.34623	0.0299654
LOC105945479	1.29947	0.000218604	LOC108705740	2.51477	0.0199228	Xetrov90028231m.L	4.29715	0.0433517	egr4.L	5.79668	2.2e-10	zeb2.L	6.33011	4.28e-23
lefty.L	1.2786	0.0174401	slc4a2.S	2.47166	0.00957653	LOC108718766	4.29649	0.0460046	traf1	5.78593	0.00993766	crb2.L	6.3159	1.07e-08
gadd45g.L	1.2613	6.52958e-05	irx3.S	2.47056	0.00915855	Xelaev18002940m	4.28702	0.000591114	ptpn22	5.78062	0.00165685	foxd3.L	6.31527	9.23e-07
Xelaev18023727m	1.23222	0.0392038	akap6-like.S	2.45216	9.64e-05	socs1.S	4.2797	1.77358e-13	Xelaev18000697m	5.77776	0.0211734	mmp13l.L	6.31485	0.0306388
LOC108716019	1.21618	0.00601635	kcnj11	2.44957	0.0480229	LOC108714611	4.25662	0.0242704	Xelaev18029838m	5.76896	0.0443146	Xelaev18001880m	6.30199	0.0048304
LOC108703754	1.20426	0.0185956	arg2.L	2.44737	0.000267737	hmcn1.L	4.24693	0.0424984	Xelaev18034024m	5.75784	0.0115483	cxcl8.S	6.3015	0.048395
fam46a.S	1.20391	0.0135761	nr2e1.L	2.4452	0.031302	fezf1.L	4.24288	6.05495e-05	nags.L	5.7518	0.00931855	tspan1.L	6.29907	9.12e-14
Xelaev18000217m	1.194	4.6491e-06	LOC108714507	2.44072	5.83e-11	LOC108713694	4.24285	9.28977e-06	hoxb3.S	5.72889	3.14e-06	Xelaev18032625m	6.28994	0.00379341
atf4.S	1.19099	0.00562116	MGC115316	2.44008	2.5e-06	hoxc3.L	4.24197	0.0222342	ctgf.L	5.72455	1.66e-07	Xelaev18040602m	6.27746	0.00173888
efhc2.L	1.17965	0.0362773	Xelaev18002025m	2.40557	0.0153003	eln2.S	4.2401	0.0361391	Xelaev18046797m	5.7144	0.0178246	Xelaev18008252m	6.27455	0.00774917
nr4a1	1.17711	0.0321469	slc38a8.L	2.4012	0.0458881	fibcd1.L	4.22034	3.25938e-08	osgin1.L	5.70833	0.0106825	osmr.S	6.26909	0.0381956
eif4a2.L	1.16791	0.0462516	LOC108715641	2.40102	0.0291115	jund.S	4.19802	2.83117e-24	gja5.S	5.70072	9.17e-05	htr3b.L	6.26499	0.0107584
c18orf32.L	1.15335	0.00928437	egr2.L	2.37959	1.39e-12	hoxd13.S	4.1953	0.00132336	il15ra.S	5.69569	0.00945668	map3k14.L	6.2626	1.68e-06
Xelaev18000460m	1.13932	0.0300364	cebpa.S	2.34566	5.1e-10	Xetrov90020492m.L	4.18881	0.00741386	Xelaev18030544m	5.69377	0.0173734	cyp27b1.L	6.25879	5.34e-10
slc26a6.L	1.13544	0.00146923	LOC108705899	2.33858	3.87e-06	hes1.S	4.18519	7.34553e-25	Xelaev18044201m	5.69204	0.039853	il6r	6.25427	0.015832
ier2.L	1.12734	0.00129909	g0s2.S	2.33681	0.0160042	dis3l	4.16272	1.06086e-10	Xelaev18032625m	5.68835	0.00574078	rerg.L	6.25427	0.0156637
dynll2.S	1.0913	2.51745e-05	pbxip1.S	2.3316	0.00567689	igfbp1.L	4.15989	0.0238468	pax3.S	5.68405	1.05e-19	fam155a.S	6.24725	0.0333635
kank1.S	1.07977	0.00723212	cyp27b1.L	2.29183	1.75e-07	ecm1	4.1572	0.00853603	hspb1.S	5.6829	0.0270016	Xetrov90022198m.S	6.24428	0.0427021
LOC108704307	1.06045	5.43763e-05	hes5.2.L	2.29147	0.000343309	foxb1.S	4.14127	0.00578608	myh1-2-1.L	5.68119	0.00192545	scrt1.S	6.23259	3.81e-05
Xelaev18021693m	1.0551	0.0112639	cebpa.L	2.28627	4.62e-07	LOC108713982	4.13902	0.00248206	eif2s1	5.68117	0.00960225	six1.L	6.22296	0.000723557
cdca7.L	1.0168	0.0110939	Xelaev18026908m	2.24444	0.0162487	plekho1.S	4.13593	0.000269511	LOC108711579	5.67822	1.07e-16	sfrp2.L	6.22237	1.26e-32
h2afj.S	1.00772	0.0305332	LOC108716750	2.21299	0.00153556	pou4f1	4.12501	0.000621445	abhd1.S	5.67752	0.0454147	Xetrov90000584m.1	6.2125	0.0141117
osgepl1.L	0.993869	0.00373494	junb.S	2.2034	0.000267737	avil.L	4.09534	0.00498131	egr3.S	5.67084	0.000138321	gmip.L	6.21062	0.0385541
asmtl.L	0.987027	0.000249445	hoxd10.L	2.19264	0.00052282	Xelaev18038081m	4.08234	0.0191642	gucy2f.S	5.66173	0.0135273	LOC101732807.L	6.20739	0.00118112
dusp1.S	0.979645	0.00402995	LOC108713742	2.18873	0.0466187	Xelaev18003069m	4.06255	0.000122365	foxb1.L	5.65951	3.08e-13	LOC108711248	6.20644	0.0034542
tfap4.L	0.979412	0.00997837	parp12	2.18724	0.0127129	aifm3.S	4.02597	0.0147067	drgx.L	5.65606	0.0140381	LOC108700601	6.17946	0.00182178
ND2	0.965092	0.00336113	kbtbd11.L	2.18094	0.00721758	rassf9.S	4.02206	0.0149953	tns4.S	5.65044	0.0237449	havcr1.L	6.17429	0.0264237
ccdc175.L	0.964924	0.0441572	rsph1.L	2.16462	0.0329688	Xelaev18040117m	4.01697	0.00106169	tal1.L	5.62526	0.0124106	myoc.L	6.17396	6.34e-07
odf2l.L	0.94487	0.0204296	olig4.S	2.15803	0.00102103	Xelaev18001986m	4.00631	0.0183136	kif1a.L	5.60806	0.0141879	noxo1.1.S	6.16431	0.0466277
LOC108718446	0.942985	0.000395505	iqsec3.S	2.15768	0.0497757	npr2.S	4.00131	4.33256e-06	fbxo40.L	5.59765	0.0271625	ecel1.L	6.16333	0.00414797
tRNA-Met	0.941912	0.0368143	otx2.L	2.14642	0.00548121	cd72	3.99626	0.0498189	Xelaev18022310m	5.57269	0.01888	tpm2.S	6.16214	0.0190294
LOC108715080	0.918012	0.0335023	LOC108704654	2.12248	5.52e-05	Xelaev18040113m	3.98236	0.0257552	hoxc10.L	5.56699	0.0160816	shc2.L	6.15844	0.0459316
tubb4b.L	0.907489	0.0174401	nfkbiz	2.12094	9.01e-05	xirp1.S	3.97703	0.00383192	Xelaev18040113m	5.56614	0.0043381	fas.S	6.15268	0.0132753
dusp6.L	0.893655	0.0366913	serpinb4.L	2.11358	0.015634	Xetrov90028960m.L	3.96353	0.0244744	Xetrov90021942m.S	5.56495	0.0262307	hnf1b.L	6.14972	0.0410561
acsl1.S	0.873432	0.0441572	atf3.L	2.10945	7.31e-09	scyl3.S	3.95767	0.0237557	LOC108701737	5.55921	0.0268174	agmo.L	6.14859	0.0429963
aprt.L	0.864688	0.0232441	upp2.L	2.09248	0.00334796	csnka2ip	3.94496	0.0294501	nova1.S	5.54992	0.00275941	zbtb38.S	6.14838	0.0151223
psma4.L	0.860902	0.0440575	parp12.L	2.07274	6.61e-05	Xelaev18011349m	3.94172	0.00210114	zeb2.L	5.54758	9.32e-25	Xelaev18037376m	6.12843	0.0339667
loc100144286.L	0.860438	0.0047334	foxn4.L	2.07159	5.08e-05	dusp10.2.S	3.93337	4.93743e-06	tmprss11d	5.54045	0.0189429	nab2.L	6.12366	0.0136998
LOC100158389	0.854741	0.0150178	hist1h3g.L	2.06028	1.77e-05	steap4.L	3.91735	4.53324e-05	LOC108697563	5.5274	0.0191676	frmpd1.L	6.11996	0.0199391
LOC108719558	0.814908	0.00501605	egr1.S	2.055	2.39e-05	LOC108696174	3.91009	0.000113233	Xelaev18006329m	5.52361	0.0319698	actc1.L	6.11698	0.00441695
znf33a.L	0.791837	0.0492693	hes2.L	2.05305	4.17e-06	nphs2.L	3.90868	0.0436329	Xelaev18003019m	5.51812	0.0173842	Xelaev18047810m	6.1145	0.00592185
ND1	0.784075	0.0305685	junb.L	2.04904	5.46e-05	fezf2.S	3.87794	0.03567	LOC108703371	5.49806	0.0286013	slitrk2.S	6.10879	0.00508883
dck.2.L	0.768707	0.0357388	socs3.L	2.02142	0.0129303	hoxd1.L	3.87627	0.000611393	Xetrov90019340m.S	5.48992	6.15e-06	Xelaev18009605m	6.10777	0.000524405
mterf3.S	0.726619	0.0139481	slc30a10.L	2.01312	0.000125371	etnppl	3.85571	0.00227657	neurod2.L	5.48857	3.1e-06	cel-like.2.S	6.1038	0.00846685
rasd1.L	0.691921	0.0357388	LOC108697411	1.99796	0.049506	foxd4l1.1.S	3.85315	1.77943e-13	gcnt3	5.48624	0.0177686	il13ra1	6.08819	0.00503501
sumo2.S	-0.572338	0.0492998	LOC108718445	1.98729	0.00433891	hoxd13.L	3.84839	0.000807973	slc32a1.S	5.47485	0.000139837	LOC108704413	6.08522	0.0157415
ddx3x.S	-0.592627	0.00709274	moxd1.S	1.98609	0.0267817	stoml3	3.84395	0.00103599	cyp27b1.L	5.46644	7.29e-41	cmpk2.S	6.07414	8.22e-07
tjp1.S	-0.629586	0.0390015	cluh	1.95791	0.0440728	rax2.S	3.84042	0.0122574	zscan5a	5.4634	0.020329	LOC108709607	6.06778	0.0206554
sel1l.S	-0.644365	0.0303218	ddt.S	1.94614	0.0440728	mettl24.L	3.8343	0.0145169	LOC108708276	5.45849	0.0197997	Xelaev18036935m	6.06423	0.0470556
lbh.S	-0.648537	0.022924	nr4a1.L	1.93614	4.03e-05	padi4	3.83151	1.99593e-05	pde9a	5.45268	0.0053078	pgam2.S	6.06423	0.0470556
plcd1.S	-0.653183	0.0112372	wnt16.S	1.93048	0.0460768	foxb1.L	3.80437	1.15623e-07	Xetrov90022086m.S	5.44692	0.0263846	fam181b	6.05383	0.0396687
gna14.S	-0.664345	0.0357388	znf367.L	1.92329	0.00548121	pknox2.S	3.80428	0.00827334	hoxd4	5.44104	0.0240863	Xelaev18032624m	6.05364	0.0113215
ywhaz.L	-0.678145	0.0441572	shox2.S	1.92236	0.0181046	Xelaev18016589m	3.77757	0.0164098	ikzf2.S	5.43743	0.000459024	dlk2.L	6.05307	0.00146799
mfap1.S	-0.680963	0.0492693	slc24a5.S	1.89804	0.00521907	Xelaev18032521m	3.7535	0.0049468	ddit3.S	5.43346	3.44e-07	Xelaev18038081m	6.04012	0.00845603
pcmtd2.L	-0.687282	0.00358743	LOC108704294	1.88771	0.00210678	Xelaev18030151m	3.74583	0.0432196	rax.L	5.43142	1.33e-05	batf.L	6.03898	0.0100581
ubtd1.S	-0.694744	0.0319938	heg1.S	1.88119	0.00145415	vtga2.L	3.74354	0.0488958	Xelaev18003069m	5.42837	4.68e-05	fam150a.L	6.03892	0.0491081
ptprf.S	-0.742045	0.00191139	ND5	1.8797	0.00386976	LOC101731668.S	3.73997	3.5073e-05	aoc1.S	5.42732	0.0057809	slco1b3.S	6.03017	6.67e-07
clpx.L	-0.750516	0.0492998	LOC108699553	1.86867	1.14e-05	pah.S	3.73897	2.12306e-06	hoxb7.S	5.42069	0.0465998	en1.L	6.02857	0.016051
pan3.S	-0.757777	0.0225843	atoh1.S	1.86234	0.0027252	Xelaev18032753m	3.73789	0.00053905	sla2.L	5.41703	0.0287757	irx3.S	6.02454	2e-10
ptpn14.L	-0.768321	0.0441572	Xelaev18033459m	1.86138	0.0460768	nfkbiz	3.726	3.50413e-08	irx3.L	5.41553	4.88e-15	Xelaev18029830m	6.02452	0.011962
ankrd54.S	-0.811228	0.00848015	shisa4	1.85749	0.0460768	slco1b3.S	3.70658	0.0343565	pltp.L	5.41427	0.03834	egr3.S	6.01476	0.00225749
LOC108710058	-0.833343	0.00595423	lpar6.S	1.83823	0.00153556	ddit3.S	3.70315	1.2136e-05	Xetrov90016939m.S	5.40975	0.0225546	hoxb4.S	6.00369	0.000717504
Xelaev18003062m	-0.889257	0.0483954	ppp1r3c.1.L	1.8216	6.46e-05	scrt1.S	3.69302	0.0127994	cish.S	5.39417	9.94e-09	fam150a.S	5.99579	0.0190427
socs3-like.1.S	-0.915841	0.0173712	LOC100492708	1.80662	0.0370219	nrn1.S	3.67979	0.0331992	il11	5.39228	0.00111784	LOC108703099	5.99398	0.0371196
ubtd1.L	-0.929782	5.20616e-05	dusp1.S	1.80092	2.86e-05	cracd.S	3.67199	0.00609783	Xetrov90003056m.L	5.38999	0.00549134	hoxd11.L	5.99207	0.00553991
gpnmb.L	-0.947347	0.0114864	hes1.L	1.7948	3.24e-09	Xelaev18003284m	3.67199	0.00154297	levi.S	5.38341	0.0360781	Xelaev18004041m	5.97023	0.0196841
sema4a.L	-0.974017	0.00402995	dlx1	1.78927	0.0268145	tagap.L	3.65268	0.0197449	mras.L	5.38013	1.33e-19	tgm2.S	5.95939	1.32e-05
entpd2.S	-0.997733	0.00889948	cebpb.L	1.78814	0.00283948	nr2e1.L	3.65226	0.000291573	prdm16	5.37205	0.0239633	plscr2	5.94858	0.0379502
amotl1.S	-1.01898	0.0420154	trim46	1.78112	0.0356315	scn5a	3.64557	0.0207114	lrrc8d.S	5.36877	0.0328117	kcnip2.S	5.93844	0.00864304
erf.S	-1.0321	0.0223123	h2afj.L	1.77499	0.0012844	gmip.L	3.64474	0.0457316	kcnj1.L	5.3587	0.00667454	cbarp.S	5.93082	2.25e-06
gclc.L	-1.09266	0.0306658	slc44a3.L	1.77389	0.0308841	Xelaev18046472m	3.63676	1.03335e-05	LOC108716582	5.35181	0.0048303	zeb2.S	5.9247	3.45e-09
fam222b.S	-1.11642	6.42295e-05	cebpd.L	1.77315	2.23e-07	plekhg5.S	3.62032	1.68656e-06	LOC108706166	5.34396	0.0310503	gli1.L	5.91178	0.00181413
ggt1.L	-1.12946	0.00599914	ras-dva1.S	1.76996	8.23e-05	s1pr1.L	3.61672	0.0352785	Xelaev18010736m	5.3438	0.0315336	Xelaev18030343m	5.91088	0.0300732
LOC733426	-1.15483	0.00997837	socs1.S	1.76856	0.00794684	atp11a.L	3.61433	0.0381958	otop2.L	5.34199	0.0280266	Xetrov90016939m.S	5.91003	0.0273537
drc1.L	-1.16746	0.000802992	dstn.L	1.76515	0.00576771	Xelaev18010530m	3.60927	0.0132652	Xelaev18006072m	5.34013	0.006366	LOC108715837	5.90851	0.0221515
slc66a1.S	-1.18149	0.000212599	kiaa1614.L	1.75784	0.000166987	muc22.S	3.6073	0.00906977	fstl5.S	5.33888	0.0361958	ecm1	5.90494	0.00341251
eno1.S	-1.22458	0.0173712	lhx3.L	1.75756	0.0348918	mgc145260.S	3.60722	0.0231919	Xelaev18021496m	5.33615	0.0421946	pskh2.S	5.89722	0.0367108
ip6k2.L	-1.24462	0.0148115	hes5_X2.L	1.7518	0.0454374	f13a1.L	3.59764	0.000859849	onecut2.S	5.33369	1.49e-06	Xetrov90010127m.L	5.89206	0.0188948
mst1.S	-1.24834	0.0174401	LOC108704568	1.74739	1.46e-06	Xelaev18032624m	3.58996	0.0423329	LOC108714137	5.33225	0.021937	LOC108711729	5.88097	0.0144254
lmo4.2.S	-1.27984	0.00350438	kcna3.L	1.74469	0.0333678	onecut2.S	3.58045	0.000268195	clec10a.L	5.3293	0.0474535	syt14.S	5.88081	0.0133432
socs3-like.1.L	-1.28216	0.00035868	hist1h4d.L	1.74366	0.000349391	neurod1.S	3.57895	0.018742	Xelaev18032624m	5.31697	0.0470062	naip2	5.87185	0.00952618
LOC108700849	-1.31754	0.0114864	slc5a1.2.L	1.73822	0.0493565	nptx1.L	3.57768	0.0498837	cobl	5.31659	0.031957	neu3.1.S	5.87144	0.0274587
fdps.L	-1.38063	0.00562116	Xelaev18023727m	1.73766	0.000834732	Xelaev18004301m	3.57302	0.0246616	znfx1.L	5.30534	7.42e-09	otx2.L	5.86787	5.33e-10
ube2e2	-1.382	1.1851e-05	foxd4l1.1.S	1.73653	0.0127751	wnt7a.S	3.56026	2.26731e-06	Xelaev18036399m	5.29949	0.0350079	prdm12	5.85438	4.11e-05
tns2.S	-1.39539	0.0161615	bhlhe40.L	1.72829	0.0378037	slitrk3.S	3.55712	0.033183	LOC108695692	5.2975	0.0395306	rgs20.L	5.85236	0.00142203
c3.L	-1.40449	0.0377584	Xelaev18046094m	1.72618	0.0456895	irx3.L	3.5539	9.72191e-08	nkx6-2.L	5.29282	1.25e-06	otx2.S	5.82151	4.68e-08
impa1.L	-1.43207	0.00819411	pts.S	1.72372	0.00199938	btg2.S	3.55137	3.92472e-13	rusc2.S	5.28854	0.046592	pah.S	5.81385	0.00347997
mxi1.L	-1.43605	0.027874	LOC108709387	1.70111	0.00191514	LOC108717933	3.54912	2.55044e-06	ai661453	5.28718	0.0422521	lrig3.L	5.8065	5.32e-61
foxi4.2.S	-1.44519	0.0300251	LOC108719883	1.70027	0.00732547	stab2.L	3.53314	0.00124982	nkx2-5.L	5.26729	0.0377566	gucy2f.L	5.80244	0.00503636
MGC81482	-1.476	0.00573737	arl6ip1.L	1.69584	0.0334397	igsf3	3.52637	1.36956e-05	LOC108697613	5.26309	6.26e-05	rrad.S	5.78879	0.000949268
nbr1.L	-1.47897	0.0208591	adra2a	1.69044	0.0216478	LOC108714688	3.52404	0.0299003	hoxb9.S	5.26178	0.00870078	dbx1.S	5.78857	0.00508165
kitlg.L	-1.48559	0.0243364	hist1h2aj.L	1.68657	0.00334796	Xelaev18002728m	3.51967	0.001119	loc446281.L	5.26176	6.26e-05	Xelaev18003284m	5.78763	0.000590632
loc100492299.L	-1.59716	0.00562116	fzd1.L	1.67239	0.00113531	Xelaev18012882m	3.51514	0.000344097	gm13889	5.26087	0.00481288	cyp2d6.S	5.78516	3.09e-06
cdx1.S	-1.59858	0.0303218	h2afj.S	1.67108	6.54e-06	Xelaev18040124m	3.51324	0.0445054	Xelaev18012881m	5.24458	1.45e-06	tecta.1.S	5.78431	0.0187233
xzar2	-1.76679	0.00947989	hist1h1t	1.67006	0.0254373	c8orf34.S	3.50571	0.0109732	pah.S	5.23985	3.88e-10	tmc1	5.78396	0.005484
ventx2.1.S	-1.78252	0.00191959	gm39120	1.66874	0.0382441	pcsk9.L	3.49336	0.0412512	rgs20.L	5.23658	3.82e-07	hes3.S	5.77965	2.94e-05
LOC108697654	-1.78563	0.0478887	txnip.L	1.66055	4.74e-06	lipc.S	3.47324	0.00109975	slco1c1.L	5.22586	0.00860229	akr1c8p.S	5.77048	0.0244986
MGC84586	-1.82194	0.00185701	ttc9.S	1.64907	0.0394219	atf3.L	3.46202	2.38097e-19	rassf9.S	5.22242	0.0362051	Xelaev18026797m	5.76247	0.0268269
lin28a.L	-1.85856	0.000971733	LOC108702848	1.64643	0.000422898	LOC108705350	3.46139	0.0472903	nr4a2.S	5.21801	4.94e-15	gdf15.L	5.74671	0.0411154
znf512b.S	-1.91383	1.48693e-05	adrb2.L	1.64627	0.00212595	dusp7.S	3.45374	6.09892e-05	tmem116.S	5.21336	0.00741531	stoml3	5.73916	0.00124954
wap	-1.98647	0.000561897	znf503	1.63228	0.00103347	plekhh2.L	3.44982	0.0284009	deptor	5.20649	0.0186249	lif.L	5.738	0.000626636
mkx.S	-2.0016	0.0467488	rnd3.S	1.6279	0.00193265	pcdhac2.S	3.4407	0.000202919	gfer.S	5.19894	0.0494879	loc100494211.L	5.72521	2.1e-07
slc7a8.S	-2.04911	0.000204269	pgm1.S	1.62661	5.39e-05	Xelaev18000067m	3.43935	0.0395694	cxorf21.S	5.19406	6.34e-15	hoxc12.S	5.6979	1.31e-06
fam131a.L	-2.05551	0.0221549	cmtm3.S	1.62248	0.0467588	mctp1	3.41739	0.000175768	LOC101734172.L	5.18877	0.0012669	Xetrov90009976m.L	5.69267	0.0482301
tub.S	-2.07321	0.00573737	LOC108719063	1.62134	0.00122978	kcnj2.L	3.41601	0.000230769	LOC108706846	5.1818	1.72e-06	LOC108703371	5.69132	0.035756
elavl3.L	-2.20386	0.0206073	socs3	1.61839	0.0254373	LOC108700343	3.40359	0.00750491	wnt16.S	5.16562	3.78e-08	LOC101734605.L	5.6899	0.0412532
Xelaev18005463m	-2.31281	0.0209772	ldlr.S	1.60409	0.0137997	unc13d.L	3.38599	2.74016e-13	Xelaev18014725m	5.15721	5.76e-05	nrsn1.L	5.6854	0.0232668
bbox1.S	-2.32976	0.025687	cldn5.L	1.59702	0.0371323	trnaq-uug	3.38329	0.00218879	chrd.2.L	5.15668	0.00284525	cacnb3.L	5.68462	0.0349948
vasn.S	-2.51101	0.00352173	fam46a.S	1.59452	3.98e-08	ikzf2.S	3.38102	0.00506751	LOC108719075	5.14254	0.0448384	tmtops2.L	5.6751	0.0426816
thnsl2.L	-2.57568	5.20616e-05	pim3.S	1.59434	7.58e-10	Xetrov90026057m.L	3.35936	0.00474252	LOC108701546	5.13383	0.000315428	pigz.L	5.67454	0.0343123
MGC86483.L	-2.63934	0.001874	LOC108703537	1.59081	0.0394872	cyp26c1.S	3.34071	0.0073699	foxa4.S	5.12854	0.0276631	LOC108719770	5.66166	0.0442695
jak2.S	-2.6521	0.0209772	nedd4l	1.58679	0.046141	Xelaev18004210m	3.32583	0.00409662	Xelaev18030348m	5.1278	0.0232442	LOC108696785	5.65792	5.69e-08
ventx2.2.L	-2.72463	5.78527e-06	LOC108705810	1.58193	0.0348564	Xelaev18003735m	3.32557	2.18453e-19	ackr3.S	5.12235	2.13e-13	kcnb2	5.65346	0.0328135
LOC108717369	-2.96567	0.00260344	prkcd	1.58115	0.00581204	prkd3.L	3.32555	0.0135556	ass1.S	5.12043	0.000379926	tnfaip3.S	5.65322	0.00565916
LOC108715806	-3.02645	0.0443035	LOC108706318	1.57849	0.000378081	foxd4l1.2.L	3.31755	2.22045e-08	LOC101735011.L	5.11508	0.0460761	LOC108704748	5.6426	0.0362545
Xelaev18026345m	-3.03121	0.00479607	wnt11b.L	1.57815	0.00256376	LOC108705612	3.30392	0.0296023	LOC108713694	5.11321	7.7e-11	LOC108719228	5.64113	0.0463056
uts2r	-3.04929	0.00755426	sgk1.S	1.56486	6.11e-07	LOC108705740	3.29399	3.28526e-05	fosl1.S	5.11301	1.16e-10	apold1.L	5.60633	1.86e-05
apcdd1.S	-3.07495	0.0114864	flrt2.S	1.56003	0.0280683	Xelaev18005971m	3.29308	0.00456904	tpm2.S	5.1072	0.00220087	mtss1l.S	5.60628	0.0244908
ventx2.1.L	-3.16996	1.94717e-05	LOC105945479	1.55686	1.51e-05	twist1.S	3.29259	0.00777015	Xelaev18009605m	5.09257	1.62e-10	ccdc80	5.60324	0.0111565
tfap2e.S	-3.35832	0.00840724	map3k19.L	1.55622	0.0441235	nr1d2.S	3.28381	0.0112611	klhl35.L	5.0839	0.017582	LOC108700186	5.60123	1.45e-08
opn5.L	-3.52857	0.00562116	lrrc8c.S	1.54974	0.000429123	Xelaev18036200m	3.27313	0.0252417	mmp13l.L	5.06287	0.0157543	gcnt3.L	5.59295	0.00887444
msr1	-3.7084	0.043478	LOC108705673	1.54651	0.00962694	f2.S	3.2593	0.0346014	zic4.S	5.06236	5.7e-15	fgf16	5.59108	7.25e-08
asic2	-3.73164	0.00227111	efs.S	1.5444	0.00564179	Xelaev18003797m	3.25781	0.0247389	LOC108718211	5.06094	0.0138542	ptpn22	5.58261	0.0437956
igsf11	-3.96205	6.73054e-08	Xelaev18000460m	1.54164	0.0127751	prdm12	3.25542	0.0432196	cyp2d6.S	5.0605	3.14e-08	cish.S	5.57761	3.77e-05
fhod3.L	-4.13902	3.12111e-05	serpinh1.L	1.53203	6.54e-05	ddr2.L	3.24722	0.000671852	Xelaev18002710m	5.0591	0.0243989	osgin1.L	5.55045	0.0442424
ltk.S	-4.74195	1.36107e-07	arrdc3.L	1.5124	0.000104412	Xelaev18006325m	3.24599	0.00902163	il13ra1	5.05802	0.0174641	ak5	5.54875	0.00482925
cygb.L	-4.97656	0.0174401	LOC108696320	1.5121	0.0243945	Xetrov90021032m.L	3.24579	0.00905493	amotl2.S	5.05225	9.69e-37	lpl.S	5.54069	4.41e-05
rnf151.L	-5.31006	0.0492998	loc100145274.L	1.5112	0.037583	dmrt2.S	3.24197	0.00180166	fgf11.S	5.04937	0.00155305	cxcl11.L	5.52768	0.0212763
LOC108695290	-5.39907	0.0335023	dydc1.L	1.5041	0.031791	rax.S	3.23696	0.0475183	Xelaev18047274m	5.04542	2.82e-12	LOC108704207	5.52611	0.000763883
pear1.S	-6.25966	0.0483954	rasl11b.S	1.5035	0.0248254	cebpa.S	3.23607	3.3023e-14	fam155a.S	5.03124	0.0135977	LOC108708413	5.52424	0.0201342
arhgap25.L	-7.72619	0.000207732	nr4a1	1.49316	9.29e-06	Xetrov90015502m.L	3.23284	0.0497479	bcl6.L	5.02878	1.45e-07	lhx3.L	5.52153	0.000709263
dgkb.S	-7.97197	1.27427e-05	arrdc3.S	1.48923	1.93e-06	egr1.L	3.22216	6.49919e-05	cacnb3.L	5.02774	0.0190798	pou3f1.S	5.51957	0.0076327
Xelaev18031172m	-8.45952	8.46039e-07	ceacam21	1.48456	0.0242244	gja5.S	3.215	0.000728502	rax.S	5.02724	0.00198014	LOC100495886.1.S	5.51754	0.0267595
4.8% TF			mab21l2.L	1.48251	0.0494327	Xelaev18001463m	3.21412	0.0255671	Xelaev18032753m	5.02208	0.00404472	atp1a3	5.50674	0.0435069
			pcdh8.S	1.4813	0.0104928	hes3.L	3.20448	0.0159568	map3k13.L	5.01262	9.66e-05	emilin1.S	5.49001	0.0437717
			Xelaev18022564m	1.47918	0.0304264	igsf6	3.19988	0.00228726	vax1.L	5.00666	0.0237211	foxd1.L	5.47666	0.0139866
			LOC108711538	1.4763	2.12e-11	fosl1.S	3.19638	0.000129045	hoxb6.S	5.00425	0.000666611	Xelaev18012881m	5.47256	0.00160243
			Xelaev18030392m	1.47136	0.00592821	LOC108703938	3.19405	0.000304554	LOC108719432	5.00128	0.0144255	abcb4	5.47187	0.0362545
			LOC108716019	1.46081	4.88e-05	myo18b	3.1865	0.00811462	hes7.1.L	4.99551	1.69e-12	lmtk3.L	5.43574	0.0492954
			LOC108703754	1.45668	0.000536767	adam11.S	3.1773	0.04134	pak1	4.99293	0.0162729	Xelaev18018965m	5.43077	0.0492739
			znf628.L	1.45441	0.0029201	rax.L	3.16227	0.0281483	LOC108698356	4.98411	0.0266098	ddit3.S	5.42355	0.00210046
			MGC82544	1.44447	0.000657515	rasgrp2.L	3.15281	1.88816e-06	ccdc177.L	4.97989	0.00414868	Xelaev18021497m	5.41245	0.00125237
			scamp5.S	1.44366	0.0035366	LOC108706071	3.15214	0.0016056	LOC108714688	4.96987	0.000997068	Xelaev18042807m	5.39979	0.0439424
			LOC108710827	1.44289	0.00816788	grin2b.L	3.15058	0.0391556	LOC108717933	4.96472	4.73e-10	c5ar1.S	5.39591	1.83e-05
			foxc2.S	1.43893	0.0367631	LOC108710848	3.14191	0.00940572	spo11.L	4.95759	0.00261008	LOC101733073.L	5.39172	0.000120425
			sox1.S	1.43513	0.0237218	ldlrad1.L	3.14058	0.0011282	ampd3.S	4.95399	1.23e-09	bmpr1b.L	5.38268	2.11e-06
			LOC108719562	1.43373	0.0248254	pde9a	3.13633	0.0457316	lhx3.S	4.95235	6.73e-14	LOC108713694	5.37898	1.57e-05
			myod1.L	1.42782	0.00156037	fosb.S	3.13309	0.00178388	Xelaev18002728m	4.94586	0.000427671	egr4.L	5.36707	0.000322882
			znf33a.L	1.4184	0.00550768	tnn.L	3.12966	0.0039887	LOC101734605.L	4.9405	0.00569007	nr2e1.S	5.35813	0.000186905
			ldlr.L	1.39828	0.0242244	mob1b.S	3.12279	0.00922106	LOC108713701	4.93347	1.91e-14	gabra1.L	5.33821	2.2e-06
			tmem64.L	1.39722	0.0160042	ttc24.L	3.11432	0.000510446	Xelaev18023000m	4.92873	0.00624625	Xelaev18030928m	5.33258	0.0196486
			LOC108712518	1.3935	0.0194621	arx.L	3.11102	0.00435554	lingo1	4.92544	0.00375259	Xelaev18018945m	5.33254	0.0143185
			LOC108716727	1.39008	0.025314	Xelaev18043377m	3.10254	0.0307441	Xelaev18039587m	4.92311	0.0390998	ngf.S	5.32587	0.0129267
			LOC108718446	1.38782	4.03e-05	LOC108703373	3.09321	0.0170073	Xelaev18004210m	4.92066	0.000881105	Xelaev18043377m	5.32458	0.0167921
			slc2a1.S	1.36268	0.000389218	Xelaev18003120m	3.08165	0.000445439	mettl24.L	4.91279	0.0203885	hmcn1.L	5.32084	0.015832
			LOC108705484	1.35444	0.00283948	tbr1.L	3.081	0.032303	fgf16	4.91261	0.0013534	noxo1.1.L	5.32013	0.00569233
			lpcat2.S	1.34365	0.0349408	Xelaev18000337m	3.06166	0.00181918	etnppl	4.91194	2.08e-07	foxa4.S	5.31878	0.0143547
			tcim.L	1.34232	0.00548121	tRNA-Gln	3.05997	0.00416875	f3.S	4.90057	3.53e-08	LOC108705836	5.31854	0.023386
			Xelaev18005946m	1.34217	5.09e-05	cyp27b1.L	3.05577	2.77605e-23	LOC108703070	4.89696	0.0389878	gja5.S	5.3169	0.0327814
			zbtb21.S	1.34054	0.0260003	emilin1.S	3.05305	0.00721615	Xelaev18027090m	4.89201	0.000252427	LOC108697565	5.31445	0.0307636
			smad4.1.S	1.33991	0.0240358	cldn5.L	3.04818	3.69029e-05	LOC108701270	4.89169	0.00647573	dusp10.2.S	5.3033	0.000100883
			cdkn2c.S	1.32976	0.0308142	flt1.S	3.04624	0.016341	Xetrov90015439m.L	4.87615	0.0201232	dusp10.2.L	5.29718	0.00189685
			Xelaev18041975m	1.3164	0.00153556	gpr151.L	3.04482	0.00238923	cbl	4.86941	0.021153	socs1.S	5.29211	8.93e-06
			fam46a.L	1.31377	8.35e-06	hoxd10.L	3.04288	1.00488e-10	lmtk3.S	4.85865	0.000514266	LOC108708906	5.28471	0.00209203
			braf.S	1.30482	0.000378081	cish.S	3.03841	2.46061e-06	LOC108697493	4.85238	0.000649983	pgm2l1	5.27701	1.6e-19
			LOC108704134	1.30455	9.63e-05	egr2.L	3.03481	3.81775e-05	klhl17	4.85173	0.0208982	LOC108705350	5.26625	0.00198019
			spsb3	1.30149	0.00283948	cebpb.L	3.03294	1.28484e-08	nr2e1.S	4.84904	1.39e-05	fn3k.L	5.26316	9.24e-08
			adrb2.S	1.30036	0.00584994	tgm1.L	3.03119	0.0226423	fibcd1.L	4.83694	2.94e-09	nol6	5.26108	0.0275962
			dynll2.S	1.29863	0.00224704	LOC108704362	3.03008	0.00732739	LOC108710770	4.83391	0.0046363	Xetrov90008421m.S	5.24037	0.00164595
			LOC100489607.1	1.28891	0.0118563	rgs20.L	3.01811	0.048307	LOC108702019	4.82517	0.016873	ror2.S	5.2365	9.6e-09
			LOC108704307	1.28595	0.000325981	padi4.S	3.01775	0.00707151	hoxc3.S	4.8227	0.00542636	itgb7.L	5.23631	0.00124234
			pjvk.S	1.28247	0.0467734	Xelaev18027090m	3.01308	0.0337048	fgf20.L	4.82013	1.48e-05	Xelaev18003991m	5.22544	0.0255992
			LOC108696832	1.28037	0.00567136	foxa4.L	3.01306	0.00412392	cxcl18.L	4.80634	0.0411824	amigo1.S	5.21771	0.035756
			sgk1.L	1.27283	0.00551555	b3gat2.S	3.01111	0.0328154	LOC108715837	4.80504	0.0068538	c1qtnf7	5.2167	0.0272224
			ins	1.27104	0.000229133	nkx2-3.S	3.00589	0.000859849	stab2.L	4.80285	2.09e-05	pcsk9.L	5.21409	0.0368453
			gpx2.S	1.26981	0.020232	akap6-like.S	3.00526	2.35174e-11	Xelaev18003561m	4.79991	0.00510392	LOC108720136	5.19871	0.00236096
			crebl2.L	1.26327	0.0332726	Xelaev18040122m	3.0017	0.0113552	Xelaev18040117m	4.79682	0.00765509	upp2.L	5.19062	4.62e-05
			LOC108695812	1.25429	0.0254373	Xelaev18031889m	2.99603	0.0235059	abra.S	4.79623	0.0425929	padi4	5.18824	6.27e-09
			LOC108718942	1.25398	0.0231724	col11a1.L	2.99525	0.00166741	ptchd1.S	4.79333	0.00105241	nrn1.L	5.18617	0.000786161
			cxorf21.S	1.25359	0.0463119	nr4a1.L	2.97365	2.33547e-05	LOC108700343	4.78896	0.000107386	egr1.L	5.18413	0.00013059
			znrf1.L	1.25025	0.0370219	star.L	2.97267	0.00285436	lpar6.S	4.78481	8.68e-24	dennd2c.L	5.17938	4.82e-20
			Xelaev18000592m	1.23799	0.00698962	hoxc12.L	2.96553	7.56791e-06	kctd4.L	4.78454	0.00927415	nova1.S	5.1785	0.0211503
			sidt2.L	1.23029	0.0289725	nlgn2.S	2.95821	0.019787	hgs.S	4.7747	0.00108008	cndp2	5.17263	7.02e-08
			LOC108719558	1.22606	2.23e-05	slc17a6	2.95803	0.0305272	sez6l2.L	4.77143	0.0373435	txnrd1.S	5.16752	1.58e-05
			rmi1.L	1.22568	0.00291097	dnah1.L	2.95586	0.0157933	LOC108700971	4.77142	0.0376525	mgc69520.S	5.15986	1.22e-11
			eme2.L	1.22267	0.0331933	tpm2.L	2.94684	0.0254104	lrig3.L	4.76583	7.29e-53	fkbp8.S	5.15858	0.0342729
			LOC108717895	1.21495	0.00234379	Xetrov90019524m.L	2.94525	0.00293359	lrrc36.S	4.76366	0.0293376	Xelaev18009606m	5.15588	0.0145009
			LOC108699848	1.20222	0.0254373	egr2	2.94169	0.00585588	hsf3.1	4.75319	0.0365296	spo11.L	5.14416	0.00317846
			LOC108698739	1.1883	0.0112314	trpv3.L	2.93417	0.0328154	LOC108704748	4.7508	0.00376311	Xelaev18047926m	5.14228	0.00570028
			ddit4.S	1.18597	1.62e-05	ccna1.S	2.90482	0.0292616	Xetrov90029571m.1	4.74971	0.0405689	rag1.L	5.14085	0.0192788
			pim3.L	1.17733	0.0237948	nt5dc3.L	2.89996	0.00234265	Xelaev18046140m	4.74663	0.0313272	hoxa6	5.11778	0.0195108
			mtap.L	1.17047	0.0105903	Xelaev18011241m	2.88857	0.013901	nfkbiz	4.74024	5.14e-17	fgf20.L	5.11179	0.00476121
			tubb4b.S	1.1687	0.00291097	f5.L	2.88662	0.0180167	pou4f1	4.7398	7.66e-07	Xelaev18012882m	5.08952	0.00690657
			sesn1.L	1.16824	0.0278147	pde3a	2.8865	0.0420853	rufy2.S	4.73887	0.0384808	Xelaev18010530m	5.07592	0.000808955
			Xelaev18000217m	1.15489	0.000267737	fzd9.L	2.87995	0.00500302	admp.L	4.73731	0.00896476	olig3.S	5.0701	5.17e-06
			mccc2.S	1.15411	0.000699459	map3k14.L	2.87522	0.00994411	c3orf70.S	4.73248	0.00661698	myh6.S	5.06816	2.6e-12
			ndufa5.L	1.14956	0.0307551	egr3.S	2.87085	0.0450183	slco1b3.S	4.72543	3.69e-05	bhlhe40.L	5.06744	0.0157793
			sgk223.L	1.13817	0.000105883	Xelaev18046473m	2.87018	0.00175241	rora.S	4.7206	0.0406132	LOC108705565	5.0581	0.025683
			rexo5.S	1.13242	0.00849525	cish.L	2.86896	0.000763391	LOC108716794	4.71089	0.0323199	npc1l1.S	5.05347	0.0217774
			LOC108703850	1.1275	0.0310128	Xelaev18019814m	2.86573	0.00383192	hoxc12.L	4.70605	3.43e-11	shox2	5.0447	0.0145048
			klf15.2.L	1.12672	0.00811626	MGC82544	2.86432	3.36493e-07	Xelaev18032521m	4.70342	5.85e-05	LOC108717371	5.03756	0.049574
			kdm8.L	1.12107	0.0373966	LOC108706398	2.84893	0.00456989	Xelaev18040367m	4.70168	0.000382876	cbarp.L	5.03213	3.15e-05
			znf208	1.11826	0.0172291	asb2.S	2.84628	2.50528e-08	cyp26c1.S	4.70051	3.59e-05	cd209e	5.0297	0.0256372
			zcchc3	1.11561	0.000914155	mast1.L	2.83558	0.0106559	Xelaev18041595m	4.69666	0.0456418	crabp2.L	5.00961	1.57e-07
			slc25a16.L	1.11217	0.0418436	pbxip1.S	2.82271	7.47168e-06	zic4.L	4.67206	1.31e-09	LOC108701422	5.00602	1.23e-05
			klhl28.L	1.11113	0.00305025	Xelaev18036712m	2.81994	0.0200006	LOC108702192	4.65503	0.00719501	a2ml1	5.00514	0.0496717
			Xelaev18004563m	1.11066	0.0388934	egr1.S	2.81307	0.000320145	Xelaev18003120m	4.65422	1.03e-12	car1_predicted.S	4.99665	0.00025418
			hspa2.L	1.0973	0.00363898	cndp2	2.80277	0.000216354	Xelaev18006071m	4.65211	0.0374416	hes7.1.S	4.98431	0.000411651
			LOC108696874	1.09677	0.000839333	ttc9b.L	2.79881	0.0109732	wnt7a	4.64841	5.45e-13	Xelaev18002964m	4.9705	0.000772441
			tfap4.L	1.09627	0.00283948	glb1.L	2.79291	0.0306447	ppp2r5b	4.6377	0.00726403	cldn5.S	4.95945	8.78e-08
			c15orf39.L	1.0893	0.0199855	zic3.L	2.79008	5.44583e-08	LOC108697565	4.63464	0.0212885	fezf1.L	4.95934	0.000662506
			hsp70.L	1.08715	0.0231724	hoxc13.L	2.78843	0.000702373	Xelaev18021988m	4.62712	0.039833	ig100492381.L	4.941	1.6e-05
			slc26a6.L	1.08086	0.0145395	Xelaev18002449m	2.7844	8.8709e-06	lrrc4b.S	4.62513	0.0368222	Xelaev18014725m	4.93118	0.00502405
			acsf2.L	1.0777	0.00346427	trim46	2.77753	1.67462e-07	megf6.S	4.6215	0.0373122	Xelaev18033675m	4.9294	0.0463974
			pias1.L	1.0775	0.0216274	ppp2r5b	2.77543	0.0416688	Xelaev18002940m	4.61617	9.69e-05	LOC108715341	4.92849	0.0362545
			ccpg1.S	1.07548	0.000298684	hes1.L	2.77062	1.25945e-15	Xelaev18020019m	4.61352	0.00992142	LOC101243550	4.92272	2.16e-11
			c18orf54.S	1.07464	0.0492338	rxfp4.L	2.76436	0.0369291	tfec	4.61154	1.41e-14	loc100498234.L	4.92212	0.0408052
			prkar1a.S	1.07364	0.00324355	parp12	2.76432	2.59117e-06	map3k14.L	4.6048	8.98e-07	nfkbid	4.91977	0.018702
			tacc3.S	1.07299	0.0169336	ackr3.S	2.76101	2.4493e-09	hnf1b.S	4.60382	0.00262907	LOC100496797-like.L	4.91779	0.00069596
			maats1	1.06943	0.00959676	ampd3.S	2.7603	0.000182678	mbd2.L	4.60361	0.0497675	bglap.S	4.91474	0.0445592
			efnb2.L	1.0625	0.00235956	shox2	2.74837	0.0117684	fip1l1	4.6033	0.00927297	frmd5.L	4.90073	0.0113424
			cyp2r1.S	1.0583	0.0312492	foxd2.L	2.74795	0.0318659	LOC108717076	4.60004	0.000646077	irf8.S	4.88557	4.33e-05
			kcna3.S	1.05631	0.0426369	insm2.L	2.74034	0.00542401	ecel1.L	4.59938	0.0117114	cyp1a1.L	4.88546	3.21e-06
			LOC108703763	1.05286	0.0458586	LOC108715641	2.73524	0.00102431	fam72a	4.59879	0.0424046	onecut2.L	4.88053	2.93e-05
			Xelaev18021693m	1.0504	0.00334796	LOC108710811	2.73431	0.000212099	ldlrad4.L	4.59554	0.000929812	kcnc3.L	4.87656	0.0233421
			lrig3.L	1.05024	0.00993667	itga10.L	2.73349	0.0155558	prdm12	4.58656	0.000338686	socs3	4.87476	0.0270459
			six4.S	1.046	0.000764562	LOC108715923	2.73267	0.0381958	Xelaev18009848m	4.58365	0.0129252	ifnar2.2.S	4.87448	0.0484711
			zic3.L	1.04018	0.0137997	zic5.L	2.73261	0.000555988	LOC108705740	4.58229	9.65e-17	LOC108710811	4.87277	1.87e-08
			actg1.S	1.0399	4.03e-05	dusp1.S	2.72359	9.37614e-10	tgm1.L	4.58202	0.00179658	aoc1.S	4.85778	0.0115887
			tubb2b.L	1.03956	0.0135047	junb.L	2.71568	2.57763e-06	neurod1.L	4.57739	0.0016869	LOC108712691	4.84557	0.0230332
			c18orf32.L	1.03636	0.00368746	LOC108699860	2.71564	0.00925649	nkg7	4.55929	0.0348615	rfx4.L	4.84247	0.000141147
			tubb4b.L	1.03531	0.0129303	hes7.1.L	2.71416	8.85864e-05	cldn15.2.L	4.55297	0.0479147	drd4.L	4.841	0.0189556
			znf101	1.02681	0.00212595	dmrt2.L	2.7022	0.00107996	nptx1.L	4.52778	0.00800246	shc3	4.83699	0.0282033
			eme1.L	1.01497	0.013078	lhx1.L	2.70136	6.59102e-05	cyp2c18.L	4.52274	0.0170484	cebpb.S	4.82582	4.84e-06
			atf4.S	1.01205	0.000438721	Xetrov90020487m.1	2.69845	0.0461966	chst1.L	4.51247	0.0213023	hnf1b.S	4.79628	0.0120542
			slc25a34.L	1.01186	0.0408117	arg2.L	2.6963	2.92776e-05	ptger2.L	4.49505	3.75e-08	asb2.S	4.79433	4.16e-05
			ints6.S	1.00915	0.0357682	scrt1	2.69484	0.0269324	zic1.L	4.48928	1.5e-30	tnfsf10.S	4.79331	0.00389136
			dck.2.L	1.00661	0.00109541	Xelaev18040367m	2.69157	0.010137	foxd2.L	4.47689	0.00240141	LOC108707157	4.7908	0.0426816
			cdca7.L	1.00065	0.0035366	lpar6.S	2.68854	6.51122e-09	dnajb1.S	4.47182	0.00522961	LOC108707801	4.78682	0.0174783
			tp53inp1.L	0.998908	0.0403391	Xelaev18030392m	2.68696	1.98589e-08	pax3.L	4.47147	3.62e-09	LOC100491629.L	4.76728	0.00158072
			dyrk1a.2.S	0.996903	0.0305293	h2afj.L	2.6802	1.1357e-11	cttnbp2.S	4.47119	9.04e-10	LOC108714675	4.75812	0.0298717
			egln3.S	0.995489	0.0441501	shox2.S	2.67408	0.00629311	kcnc3.L	4.45978	0.00196995	ins	4.75667	1.49e-19
			stat1.L	0.98764	0.041147	dusp8.L	2.67092	0.000659904	il10.L	4.4595	0.000108528	fam124b.L	4.75143	8.05e-05
			hook1.S	0.98236	0.0211465	nr2e1.S	2.67088	0.000294001	LOC108703378	4.45453	0.0198916	hoxc3.S	4.74644	0.0298691
			zswim5.S	0.982234	0.0197995	esyt1	2.66959	0.0115584	rnf223.L	4.44696	2.58e-11	shc4.L	4.7337	0.00507402
			asmtl.L	0.980069	0.000872112	otx2.L	2.6684	8.20677e-05	shox2	4.4457	0.00235435	lyz.L	4.7288	0.0299278
			MGC115291	0.974293	0.025969	Xelaev18030437m	2.66749	0.00679831	Xelaev18040602m	4.44266	0.00547825	tubb3	4.716	0.000184487
			nme9.L	0.973356	0.014753	LOC100491629.L	2.66245	0.00458044	Xelaev18002102m	4.44251	0.0247863	zic2.S	4.70755	1.16e-44
			LOC108719510	0.972393	0.0248254	plekha3.S	2.6616	0.0244718	pkdcc.2.L	4.43989	0.000115622	LOC108718445	4.70664	1.85e-08
			pank4.S	0.968185	0.0100967	admp.S	2.65708	0.049194	asb2.S	4.43491	6.3e-13	Xelaev18047274m	4.70407	0.00062581
			kiaa0232.L	0.963951	0.0324809	cacng4.L	2.65553	0.0075161	ig100492381.L	4.42309	4.22e-12	slc5a1.2.L	4.7033	0.0030387
			mylip.L	0.953562	0.028845	ras-dva1.S	2.65355	2.77243e-08	MGC82544	4.42127	3.16e-14	Xelaev18011723m	4.69717	0.0156698
			gmppa.L	0.952369	0.034916	mfap2.L	2.65269	0.00259773	scrt1	4.42102	0.000324994	ptch2.S	4.68654	1.09e-07
			slc5a9.L	0.949748	0.0371819	Xelaev18047274m	2.63876	0.000625128	lif.L	4.41843	0.00387712	tdgf1.1.L	4.66542	6.67e-12
			kmt2e.L	0.947084	0.0370219	cebpd.L	2.63238	1.13538e-12	unc13d.L	4.39851	4.63e-14	Xelaev18003120m	4.65632	0.000307323
			LOC108704201	0.944144	0.000698916	Xelaev18036489m	2.63003	0.0376912	Xelaev18009110m	4.39278	8.59e-06	chst1.S	4.65185	0.0001
			nuak2.L	0.94293	0.0147163	LOC108699825	2.62159	0.0394108	sfrp2.L	4.3892	2.38e-17	amotl2.S	4.65096	6.27e-14
			lpar6.L	0.936458	0.0168986	LOC108713440	2.62136	0.000403	Xelaev18009606m	4.38851	2.19e-06	gli2.L	4.64503	1.85e-11
			zfand5.S	0.936346	0.00382933	dnhd1	2.62114	0.000920177	Xelaev18011116m	4.37807	0.00208335	lrat.L	4.64447	1.08e-05
			rnf182	0.9359	0.00283948	mapk8ip1	2.61003	0.00132337	zic2.L	4.36518	1.5e-20	adam11.S	4.63569	0.0241235
			plk3.L	0.931158	0.0460768	LOC108708286	2.6074	0.0366476	neu3.1.S	4.35505	0.000539106	neurog2.S	4.62859	0.005484
			loc100144286.L	0.927829	0.000716179	loc100497443.L	2.60692	0.0177195	pex5l.S	4.33901	0.0199952	mmp19.L	4.61234	2.29e-16
			syde2.L	0.922374	0.0170307	Xelaev18009606m	2.60193	0.0150917	LOC108696783	4.33833	7.62e-11	Xelaev18002940m	4.60485	0.0115887
			LOC108704195	0.916289	0.0483657	junb.S	2.58735	0.0337048	LOC100491629.L	4.33369	1.69e-07	Xelaev18042341m	4.60441	5.26e-05
			wee1.S	0.914292	6.43e-06	LOC108703766	2.58468	0.00251942	Xetrov90021593m.L	4.33226	0.0081353	col3a1.L	4.60251	4.53e-09
			tRNA-Ile	0.914034	0.00632801	lhx3.S	2.58232	9.75263e-08	LOC108710811	4.33181	0.00381918	kif1a.L	4.59745	0.029168
			LOC108719529	0.912924	0.0211617	ndnf.S	2.58076	0.00108982	gcnt3.L	4.32649	0.00725344	nr2e1.L	4.59049	0.0360075
			LOC108695555	0.907493	0.0365247	LOC108718445	2.57425	0.000100544	apold1.L	4.30744	8.93e-08	slk.L	4.58979	0.00854017
			fbxl3.S	0.902486	0.030512	adal.L	2.57312	0.0447514	spdya.L	4.30565	0.0301851	grid2ip.S	4.56782	0.015832
			lrrc14.L	0.900384	0.02592	znf572.L	2.57009	0.00200183	otx2.L	4.29987	1.07e-11	trarg1.L	4.55534	0.00332791
			actb.L	0.895885	4.35e-07	rsad2.L	2.56903	0.0246487	LOC108697895	4.29745	0.0258073	map3k14.S	4.55239	3.79e-05
			marveld2.S	0.892218	0.0180532	hcn4	2.55895	3.92383e-07	apcdd1l.S	4.29369	0.0226057	phospho1.L	4.55221	0.015313
			arg2.S	0.887024	0.04134	lrig3.L	2.55751	3.14142e-07	slc17a6	4.29171	0.000409439	stard5.L	4.54757	2.41e-05
			klf10.L	0.87982	0.016977	nr2f2.S	2.55533	0.0100734	cebpb.S	4.26959	3.17e-27	kcnc3.S	4.53396	0.0235881
			aprt.L	0.878003	0.0231891	bhlhe22.L	2.54889	0.0139029	LOC101733073.L	4.26456	1.7e-05	loc100494211.S	4.52773	1.83e-14
			ier2.L	0.877216	0.000476996	pou4f1.L	2.5422	0.0435177	nrn1.S	4.26387	0.00606614	slc38a8.L	4.51029	0.00983231
			b3galt6.S	0.864245	0.0280683	LOC108698353	2.54042	0.0175036	LOC108706759	4.26314	0.0291214	rsad2.S	4.50849	0.041008
			nmrk2.L	0.859763	0.0370219	LOC108704294	2.52566	0.00236408	cbarp.L	4.25818	2.17e-09	sh2d3c.S	4.50844	7.1e-05
			arhgap29.S	0.85755	0.0100678	nr4a2.S	2.522	5.42874e-08	egr1.S	4.25511	0.00390778	tnfsf15.S	4.4988	0.00985078
			sord.L	0.85644	0.0308038	txnip.S	2.51738	6.48528e-11	LOC108700186	4.25151	3.01e-12	Xelaev18002025m	4.49602	1.32e-05
			admp2.L	0.85478	0.0329044	LOC108698417	2.51459	0.00241378	ntsr1	4.24381	0.020953	ebf2.S	4.49489	0.0178478
			ints6l	0.851779	0.0461287	mab21l1.S	2.51406	0.00169664	LOC100497709.L	4.24342	9.96e-05	scrt1	4.49272	0.002886
			ankrd50.L	0.85112	0.0385762	LOC108714507	2.50846	4.82905e-10	Xelaev18020467m	4.23903	0.0345719	cyp27b1.S	4.49096	0.0357461
			znf703.L	0.850142	0.0327803	Xelaev18012881m	2.50653	0.00277216	myh1-1-2.S	4.22962	0.0499176	lhx1.L	4.46376	0.000958474
			znf238.2.L	0.847272	0.00713649	tnfsf10.S	2.49957	0.0155558	lhx1.L	4.22933	1.95e-05	zic5.L	4.45677	1.2e-09
			mettl4.S	0.845844	0.0163664	LOC101733073.L	2.49523	0.001349	robo4.L	4.2236	0.0274608	LOC108698353	4.45562	0.0189678
			irs4.S	0.844725	0.000422147	inppl1	2.49519	0.000499744	Xelaev18039034m	4.21929	0.0286518	gsc.S	4.45436	0.0024987
			irs4.L	0.828978	0.000465755	aldh4a1	2.48853	0.0209545	bsnd.L	4.21545	0.00689887	loc108648340.L	4.45408	0.0282818
			susd6.L	0.824679	0.0213315	LOC108713701	2.48774	0.000281212	cndp2	4.2099	1.37e-11	gramd1a.S	4.45399	0.00122786
			zswim3.S	0.820945	0.0378037	ppp1r3c.1.L	2.48339	5.71632e-06	Xetrov90017311m.S	4.20923	0.00726403	Xetrov90020487m.1	4.44532	2.28e-06
			meioc	0.810754	0.015634	LOC108719562	2.48255	2.51331e-08	myh7b	4.20887	0.0367619	ackr3.S	4.44173	8.01e-09
			LOC108719533	0.804531	0.000222629	cyp26b1.L	2.46749	0.0182199	LOC108705350	4.20256	0.00135475	hsf3	4.42513	0.00023816
			dusp6.L	0.800038	0.0498522	LOC108704134	2.45941	7.79027e-08	tbr1.L	4.1985	0.0403749	mllt6.S	4.41973	1.3e-06
			mterf3.S	0.798891	0.000722395	ier3.L	2.45706	0.0115513	Xelaev18026908m	4.19761	1.31e-09	myoz2.L	4.41759	0.00349875
			LOC108703767	0.795217	0.0327803	henmt1.L	2.45631	0.00011856	sstr1.L	4.1909	0.0408526	col4a5.S	4.41625	2.09e-06
			odf2l.L	0.787414	0.0450289	parp12.L	2.45498	4.99455e-06	LOC108700601	4.18997	0.00020266	hoxb3.S	4.40421	0.00383269
			sp5l.L	0.766665	0.00140685	Xelaev18036077m	2.4541	0.0209867	Xelaev18002025m	4.18915	5.54e-19	scarb1.S	4.40273	1.46e-06
			ddx51.L	0.762983	0.0074924	crim1.L	2.45264	0.00995418	tmprss13.L	4.18234	0.0383388	phf19	4.39702	0.0150166
			dph3.L	0.756667	0.0492338	Xelaev18002025m	2.44547	0.000208848	tRNA-Ser	4.18166	1.6e-06	lrig3.S	4.38146	1.62e-33
			nufip2.S	0.748795	0.0112648	kcnk16.L	2.43484	0.0274972	c8orf34.S	4.1771	2.1e-07	foxd4l1.L	4.37973	0.00356592
			atf4.L	0.739049	0.0307551	fbxo46.L	2.43171	3.10917e-06	jph4.S	4.16435	0.0366331	nova1.L	4.37938	0.0161641
			coq10b.L	0.737924	0.0122573	bhlhe40.L	2.43034	2.83572e-05	Xelaev18035102m	4.16113	0.0324438	LOC108716586	4.37936	5.41e-09
			actg1.L	0.729735	0.00220815	loc108718661.L	2.42719	0.00179368	map3k14.S	4.1594	8.61e-11	muc5ac	4.37612	0.000318983
			acta2.L	0.725039	0.0167791	cnbd2.L	2.41074	0.00829863	cldn5.L	4.15662	4.5e-07	spon1.S	4.36697	0.00570028
			LOC108704248	0.724664	0.0304264	lrrn4cl.L	2.41066	0.0251859	bend7.S	4.15385	0.0265467	atp2a1.L	4.36276	0.035808
			alcam.L	0.709245	0.0180532	slc37a1.L	2.40754	0.000831891	LOC108719770	4.14792	0.0465834	parp12.S	4.3603	0.000318983
			racgap1.S	0.686739	0.0105996	znf503	2.40618	0.000121932	Xelaev18034225m	4.139	2.77e-07	adamts14.S	4.35844	0.00320517
			znf585b.S	0.680877	0.0169336	heg1.S	2.40372	1.78636e-06	chrd	4.13771	0.0135522	cd274.L	4.34776	0.000385129
			zic1.L	0.660771	0.0451197	prr14l.L	2.40061	0.000150004	esam.S	4.12927	0.000793077	tpm2.L	4.34677	0.000170341
			ndufaf4.L	0.659439	0.0231724	hes5_X2.L	2.3976	0.00604084	LOC108701422	4.12749	2.34e-27	f3.S	4.34362	0.00759791
			znf451.S	0.644809	0.0339996	Xelaev18009605m	2.39745	0.0449441	tnfaip3.S	4.12452	0.00162754	yrdc	4.34213	0.0209975
			actb.S	0.644381	0.00775523	LOC398451	2.38832	0.000644401	tagap.L	4.12161	0.0146568	pdp1.L	4.3396	4.37e-05
			arid4a.L	0.641188	0.0396106	hes5.2.L	2.38533	0.00188787	npr2.L	4.11843	0.0369861	LOC108713423	4.33911	0.0309527
			kbtbd2.L	0.635848	0.0450565	ecel1.L	2.38372	0.0335111	LOC108720136	4.11721	0.000175185	ptch2.L	4.33864	1.51e-07
			racgap1.L	0.605367	0.0262049	Xelaev18030606m	2.37928	0.00736575	Xetrov90008421m.S	4.11513	8.58e-05	mctp1	4.33728	0.00541372
			sec14l1.L	0.553689	0.0495817	yrdc	2.37708	1.66101e-06	LOC108698169	4.11001	0.0496812	gli1.S	4.3315	0.0076215
			ing2.L	0.548878	0.0418436	ppp1r3c.1.S	2.37683	0.00159266	treh.L	4.10876	0.00166576	myo18b	4.32961	0.00500008
			syncrip.L	-0.508626	0.0347527	znf33a.L	2.37512	2.37051e-07	f5.L	4.10719	0.00654414	LOC108698278	4.32122	0.00380712
			cpsf6.L	-0.54666	0.0394219	nppc.L	2.36673	0.00590283	hoxc12.S	4.10696	2.27e-11	tnfrsf6b.L	4.30851	0.000165586
			slc16a7	-0.553946	0.0325407	nhs.L	2.35577	0.000150714	rsad2.S	4.10314	5.65e-05	LOC100496797.L	4.29393	1.28e-12
			ehmt1.L	-0.555932	0.0460768	xmc.S	2.34357	0.00130948	tmprss2.13.S	4.10279	0.0389706	LOC100488697.L	4.292	0.0092127
			ywhaz.S	-0.557401	0.0492338	LOC108705987	2.34323	0.0148069	stoml3	4.10258	0.000365044	loc100145174.L	4.29097	0.0413467
			gjc1.L	-0.564315	0.0406067	hist1h3g.L	2.33929	1.60219e-08	onecut2.L	4.09295	3.78e-05	LOC108713982	4.28911	0.0134158
			sbf1.L	-0.57703	0.0460294	Xelaev18026908m	2.33724	0.000246656	Xetrov90020487m.1	4.0859	1.48e-05	hgs.S	4.28818	0.000764747
			fscn1.S	-0.585049	0.0314886	LOC108704183	2.33623	0.0389911	bhlhe40.L	4.08268	2.93e-14	chst3.L	4.28699	0.00830357
			srp68.L	-0.595945	0.0340728	Xetrov90022586m.1	2.33323	5.5539e-05	vtn.L	4.0732	5.69e-07	nfkbiz	4.2847	0.000104333
			agl.L	-0.605674	0.0169314	ccdc80	2.32579	0.00444463	kcnk12.S	4.06512	0.000331959	LOC108698417	4.28124	0.0148098
			ddx3x.S	-0.606983	0.0117625	kcnj11	2.31737	0.00530454	rps6ka4	4.0643	0.00701395	itgb8.L	4.26948	5.81e-09
			plxna1.S	-0.608305	0.0102125	hes2.L	2.30477	1.09473e-08	fos.S	4.05369	1.91e-11	LOC108696899	4.26908	0.00980918
			llgl1.S	-0.608903	0.0329688	hist1h2aj.L	2.30082	0.000120439	lrrn4cl.L	4.05317	0.000152438	sqle.S	4.2649	0.00139805
			nxn.L	-0.609928	0.0231724	fam3b.S	2.29887	0.000122801	plekha2.S	4.05277	3.24e-05	Xelaev18030392m	4.26236	0.000111744
			atp2b4	-0.61282	0.0129303	acot8.S	2.29483	0.00049882	slc16a14.S	4.05119	0.00516384	LOC108701458	4.25499	0.00304282
			hnrnpa0.L	-0.61386	0.0341781	olig4.S	2.2927	0.00117892	fas.S	4.04607	0.0156174	alox15b.L	4.25411	0.0120831
			map7d1.L	-0.617194	0.0456895	klf15.S	2.29168	0.0498831	irs2	4.04505	4.32e-13	sacs	4.25401	1.57e-05
			edf1.L	-0.61847	0.0494327	mafa.L	2.27506	0.00222509	LOC108697094	4.03982	0.00916123	Xelaev18040367m	4.2531	0.00257863
			litaf.L	-0.639515	0.0349408	bcl6.L	2.27191	1.29906e-05	mgc69520.S	4.0351	5.65e-14	ass1.S	4.25158	0.025332
			cluh.L	-0.641929	0.0362048	Xelaev18030795m	2.26467	0.00240362	eif2ak2	4.03171	0.000153254	LOC108712652	4.24728	0.0111384
			kif2a.L	-0.642495	0.0285549	pts.S	2.26208	2.65297e-06	chrna9	4.03114	0.0226356	kctd4.L	4.24294	0.00409147
			adar-a	-0.644483	0.0410208	sntb1.S	2.2551	0.0477911	gmip.L	4.03071	0.0135522	LOC108697613	4.23974	0.0182743
			tmem263.L	-0.647168	0.0044903	ins	2.25014	8.5356e-10	atp11a.L	4.0294	0.00307177	LOC108719531	4.23845	0.000343898
			tjp1.S	-0.65641	0.0200779	nkx6-1.L	2.25002	0.00537097	Xelaev18029830m	4.02558	0.0167857	ptger2.L	4.23249	0.00604922
			hnrnpul1.S	-0.656737	0.00861184	otx2.S	2.24738	0.0219295	hmcn1.L	4.02549	0.0247515	akap12.S	4.23072	2.07e-06
			atp13a1.L	-0.659222	0.049575	Xelaev18006019m	2.24623	0.000552965	myoc.L	4.02359	2.38e-09	ltk	4.21798	0.000554497
			erc1.L	-0.660163	0.0365477	fam126a.S	2.24437	0.00181262	jun.S	4.01239	3.16e-12	LOC108698349	4.21055	0.0231045
			clasp1.L	-0.660979	0.0408117	LOC108704510	2.24361	9.28977e-06	mgc145260.S	4.00979	0.00372023	sp6.L	4.20522	0.000652165
			dazap1.L	-0.661051	0.0124688	nfe2l2.L	2.24023	0.000458024	LOC108697894	4.00184	0.0491617	LOC108697493	4.20207	1.37e-06
			rps20.L	-0.661629	0.0340803	LOC108704293	2.23978	0.00675491	fli1.S	4.00122	0.00336239	slc39a9-like.1.S	4.20075	0.00152131
			LOC108718652	-0.67386	0.0457183	foxc2.S	2.23798	4.6497e-05	rorb.2.L	3.99912	0.0168377	ascl2.L	4.19639	1.56e-05
			ets1.L	-0.675628	0.0307551	phlda1.L	2.23066	0.0140653	nsmf.L	3.99557	0.024168	prickle1.L	4.19304	1.64e-05
			tyro3.L	-0.677397	0.0116761	LOC108702848	2.22892	3.51251e-07	c5ar1.S	3.99313	4.57e-07	myom1.L	4.18868	1.3e-06
			adam10.S	-0.684922	0.0340819	trhde.L	2.22826	0.0402347	trpc6	3.988	0.0469108	manea.L	4.18377	0.00853339
			naa30.L	-0.68848	0.034916	Xelaev18012750m	2.2267	0.00912155	nr4a1.L	3.98675	8.48e-08	irf7.L	4.18207	0.00747686
			lman1.L	-0.692177	0.0217472	epb41l1.L	2.22483	0.0393089	LOC108696785	3.9843	6.03e-16	pdgfra.S	4.17631	0.00102923
			ykt6.L	-0.697431	0.0308038	Xelaev18023727m	2.22321	4.56786e-07	grid2ip.S	3.97892	0.00135272	ackr3.L	4.17558	0.000117491
			dcp1b.S	-0.697706	0.028849	gal3st4-like.2.L	2.21556	0.00243566	eln2.S	3.97523	0.00921003	nod1.L	4.16296	0.0081764
			tgif2.S	-0.698971	0.0134769	LOC108717756	2.21283	0.0353769	steap4.L	3.97263	0.000397869	ddr2.L	4.15534	0.0205437
			ube2g1.S	-0.702957	0.0385762	kbtbd11.L	2.21209	0.000159583	pgm2l1	3.97167	2.8e-15	otx1.S	4.14132	0.000100567
			cmtr1.L	-0.70546	0.0268465	sptbn5	2.20245	0.00106072	wnt5a.L	3.96602	0.00369662	bcl2l10.S	4.13251	0.0482283
			ppp2r2a.S	-0.709405	0.00495404	cd79a.S	2.20219	0.0299138	dusp7.S	3.9496	0.000125484	sds.L	4.12894	8.6e-07
			slc25a13.S	-0.712943	0.0420398	LOC108704058	2.19201	0.0345583	tecpr1.S	3.94807	0.0177767	cebpd.S	4.12222	9.1e-17
			yy1.S	-0.714179	0.00656862	myod1.L	2.18733	0.00714874	LOC108704234	3.94288	0.01628	LOC108704601	4.12207	0.00392301
			ipo9.L	-0.714437	0.0274201	LOC108707645	2.18578	0.0263134	hsd11b1.L	3.93876	0.0113447	LOC108704510	4.12033	0.000182316
			rtf1.L	-0.715998	0.0139678	kiaa1841.L	2.18143	0.00951874	tmc2	3.93818	0.0305566	tcerg1l.L	4.11999	0.00453531
			ptk7.S	-0.716495	0.0254373	lrmp.S	2.18076	0.0203503	sema3b.L	3.9355	0.0330982	ror2.L	4.11754	4.51e-15
			pan3.S	-0.720688	0.0335511	Xelaev18021795m	2.18019	0.0329459	Xelaev18030606m	3.93135	0.000137717	steap4.L	4.1169	0.0159918
			gna14.S	-0.730426	0.016977	otx1.L	2.17921	0.000102258	Xetrov90009976m.L	3.92964	0.00472288	Xelaev18011724m	4.11347	0.000606373
			LOC443712	-0.732565	0.0180532	LOC100494033.L	2.17542	0.00241378	gramd1a.S	3.92838	2.49e-10	eln2.S	4.10007	0.0487005
			dctn1.L	-0.738461	0.0197848	rimkla.L	2.17365	0.000978427	LOC108698278	3.92565	0.00365398	hoxc13.L	4.09852	0.000458671
			ccdc6.S	-0.743996	0.0176913	adamdec1.L	2.16935	0.00874921	slc5a8	3.92201	0.0438185	LOC108718211	4.0932	0.0380476
			inpp5f.L	-0.747211	0.00957653	ugcg.L	2.16691	0.000478109	tspan1.L	3.91362	2.08e-11	slc4a3.L	4.08992	0.00214454
			shf.S	-0.75274	0.0183506	MGC84224	2.16083	0.0215197	noxo1.1.L	3.91332	0.0043945	usp18.L	4.07964	0.0136253
			src.S	-0.752967	0.0151954	cd274.L	2.15911	0.00767739	slc25a16.L	3.90532	5.53e-15	Xelaev18036489m	4.07728	0.0310393
			sox15.L	-0.757695	0.0280683	zic4.S	2.15861	0.000892751	klf15.S	3.90296	0.00367985	LOC108698350	4.06727	0.000561927
			ankrd35.L	-0.761812	0.0473006	casd1.S	2.15809	0.00420842	fam213a.1.S	3.90291	0.0113265	otx1.L	4.05643	6.27e-05
			dennd5b.L	-0.763016	0.0254373	gm39120	2.15669	0.00823402	acot8.S	3.89943	3.01e-07	LOC108700185	4.05408	0.00169007
			nipal2.L	-0.765413	0.0440728	prr5l.S	2.15343	0.0478859	hoxc10	3.89337	0.00647186	prickle1.S	4.05241	0.000132522
			socs3-like.1.L	-0.774907	0.000329467	LOC108716750	2.15188	0.000476796	zbtb38.S	3.88448	0.0107447	nr4a1.L	4.05197	0.000622453
			tgif2.L	-0.778944	0.0211617	LOC108718446	2.1488	6.79198e-19	adamdec1.L	3.87288	0.0028139	ttn	4.04738	2.42e-08
			ptk2.L	-0.781083	0.0016177	birc7.S	2.138	0.0105019	dusp10.2.S	3.86541	0.000292692	plekhg1.L	4.04341	1.02e-17
			lnx1.L	-0.783578	0.0180199	stxbp5l.L	2.13449	0.0014178	loc108718661.L	3.86536	1.95e-08	tns4.S	4.04028	0.010281
			rps26.L	-0.784826	0.0329688	anapc10.S	2.13271	0.0367802	sptbn5	3.86245	2.65e-09	lmln	4.03417	0.000412046
			sh3pxd2b.L	-0.785701	0.0460768	plcb2.L	2.13059	0.00770862	LOC108718445	3.8567	0.0019869	loc446281.L	4.03234	0.00138834
			ggt1.L	-0.792885	0.04134	stard5.S	2.13016	0.00921492	nuggc.S	3.85663	0.0181639	hic1.L	4.03089	1.15e-09
			ankrd13a.S	-0.797875	0.0477864	adra2a	2.12965	0.000801466	sp6.L	3.8564	7.24e-08	tubb2b.S	4.0307	0.000307323
			trappc9.L	-0.79888	0.0265518	Xetrov90023655m.1	2.12531	2.04564e-05	prkd3.L	3.85207	0.00534096	fosb.L	4.02737	0.00962397
			mon1b.S	-0.800918	0.0117625	Xelaev18020493m	2.12309	0.000744996	cebpd.S	3.84615	2.39e-32	LOC108719557	4.0244	0.0012045
			enah.S	-0.802385	0.00548121	f3.S	2.12042	0.0498104	Xelaev18012882m	3.84559	0.000301739	tpbg.L	4.02436	7.15e-08
			smad6.L	-0.805055	0.0410001	zic1.L	2.11265	1.68759e-09	tenm4.L	3.84249	0.0212421	pax2.L	4.01892	0.0129283
			tfdp2.L	-0.805412	0.0268892	znf367.L	2.11253	2.78646e-05	LOC108695537	3.8417	0.0183907	irx4.L	4.01862	0.0373129
			foxn3.L	-0.80889	0.0138921	cbx4.S	2.10926	0.000264627	dusp10.2.L	3.83965	0.0291708	mgc145260.S	4.01484	0.00599535
			pum1.S	-0.812403	0.0284298	Xelaev18012615m	2.10769	0.025226	Xelaev18030392m	3.83762	7.58e-17	slco5a1.S	4.01039	3.81e-07
			vangl2.L	-0.817915	0.00546935	wnt11b.L	2.10687	0.00053891	itgb8.L	3.83405	5.09e-20	bcl2l10.L	3.99289	0.00081658
			MGC132236	-0.819878	0.036909	slc5a3.S	2.10685	0.0155558	loc100492447.L	3.83354	0.00267762	mob1b.S	3.99134	0.00703881
			kifap3.S	-0.823039	0.0409628	cxorf21.S	2.09761	0.000238916	irf8.S	3.83175	2.78e-11	LOC108706828	3.98987	7.59e-05
			lbh.S	-0.827444	0.0467588	LOC108698423	2.09362	0.00950088	stard5.S	3.83152	1.87e-06	slc16a14.S	3.9881	0.00315276
			txnrd3.S	-0.827727	0.0109424	LOC108696783	2.09306	0.000255161	LOC108704413	3.83083	0.0288908	spry2.S	3.98769	4.57e-05
			clpx.L	-0.829807	0.0110751	h2afj.S	2.0918	5.29248e-08	col3a1.L	3.82969	5.49e-05	dock10.S	3.98598	0.00131936
			ctif.S	-0.845255	0.0483657	slc4a2.S	2.09169	0.000680413	slc47a2.S	3.82638	0.000310893	MGC115316	3.9853	0.0017195
			pde3b	-0.845827	0.0420398	irf8.S	2.08888	0.000456632	lpl.S	3.82181	1.26e-06	fli1b.L	3.97738	0.014351
			adgrl2.L	-0.84909	0.0225634	LOC108696845	2.08662	0.0215545	hoxc13.L	3.81405	3.74e-07	mcf2l	3.97369	5.07e-09
			lhfpl2.S	-0.851823	0.0429055	ldlr.S	2.08195	1.13092e-06	prom2.L	3.81402	6.32e-06	ldlr.L	3.96158	0.000163287
			LOC108719520	-0.851825	0.0305341	LOC108700100	2.07855	0.0186532	postn.L	3.81263	0.028581	rasgrp2.L	3.95391	0.00572123
			ildr1.L	-0.853151	0.0230782	phospho1.L	2.07674	0.0346014	fos.L	3.80996	2.69e-08	tbx1.L	3.95106	0.0134556
			tnpo2.S	-0.855477	0.000538497	cdx2.S	2.07602	0.0201852	ankrd53.L	3.80864	0.0312621	LOC108717933	3.94978	0.018843
			gpnmb.L	-0.860607	0.0187552	stoml1.L	2.06996	0.0234949	itgb7.L	3.80426	0.00926066	phf19.S	3.94629	0.00268348
			iqgap1	-0.864042	0.00564179	atoh1.S	2.06374	0.000491938	jund.S	3.79935	8.8e-11	LOC108697620	3.94124	0.00834675
			pcmtd2.L	-0.865143	0.0378037	Xelaev18032989m	2.06048	0.00792957	nkx2-2.L	3.79733	0.00546203	gal3st4-like.2.L	3.94067	0.0219989
			fam174b.L	-0.869572	0.0044903	Xelaev18033459m	2.05676	0.0248366	xmc.S	3.79601	4.42e-05	inppl1	3.93561	0.0268269
			ywhaz.L	-0.871767	0.000210828	slc12a9.L	2.04517	0.00425406	wnt11b.L	3.79545	0.00048561	adgrv1	3.92801	0.00106446
			ppp2r2a	-0.878286	4.03e-05	hhex.S	2.04211	0.0470399	atf3.L	3.79251	1.17e-14	loc108718661.L	3.92264	0.00281243
			ext2.L	-0.885485	0.0134769	adrb2.L	2.04185	0.000576925	LOC108695990	3.78855	1.26e-05	lrp2.L	3.9226	1.69e-18
			kdm2a.S	-0.886056	0.0458886	tsc22d3.S	2.03876	0.00725617	cpn1.S	3.78368	0.000561579	hacd1.S	3.92035	3.74e-05
			hif1an.L	-0.888214	0.00140685	pgm2l1	2.036	1.21013e-09	tnip3.L	3.77623	0.0239786	pax6.S	3.91992	0.000556445
			mst1.S	-0.889409	0.00671151	ttc9.S	2.03184	0.000284502	slc3a1.S	3.76949	8.87e-05	LOC108711013	3.91863	0.034851
			dsg2.L	-0.892457	0.0388934	slc30a10.L	2.02501	1.95199e-05	pxdc1.L	3.7668	0.00114162	admp2.L	3.91857	5.59e-05
			pou2f1.S	-0.895195	0.0418436	amotl2.S	2.02498	2.17159e-06	slk.L	3.75968	0.00156016	rgl2	3.9178	0.000581805
			mief1.L	-0.898574	0.0349676	socs1.L	2.02466	3.45018e-05	adh1c.L	3.75667	0.00860229	pcdhac2.S	3.90472	0.0151298
			tigar.S	-0.902736	0.0353627	sh3rf3.L	2.02445	0.0415864	LOC108718886	3.75477	0.0263046	LOC108702848	3.90376	5.66e-05
			picalm.S	-0.903488	0.0101355	LOC108716747	2.02241	0.0340737	aifm3.S	3.75134	0.0113015	Xelaev18041595m	3.90013	0.0372286
			ssh2	-0.908549	0.000564188	ing1.S	2.0219	0.00191053	LOC495518	3.74456	0.00808057	c8orf4.S	3.89601	0.00592674
			arhgef2.S	-0.910866	0.026947	zfp36l2.1.S	2.01547	0.0314458	socs3	3.74429	0.034963	optn.S	3.89331	0.000122173
			plcd1.S	-0.912572	0.000232932	vegt.L	2.01385	0.00130422	otx2.S	3.73322	5.84e-07	nox1	3.88755	5.05e-05
			ctf1	-0.917015	0.000175389	hoxc12.S	2.01037	0.00330259	LOC108713982	3.72803	5.54e-05	adamts10.L	3.87996	7.86e-05
			gdpd5.L	-0.917159	0.00492082	slc5a1.2.L	2.00974	0.00968987	cacng4.L	3.72167	1.37e-05	dusp7.S	3.87744	0.0257391
			wtip.S	-0.917512	0.0427538	simc1.L	2.00189	0.000644401	zic5.S	3.72042	2.79e-05	LOC108719432	3.87146	0.0317254
			chchd6.S	-0.918226	0.0360112	LOC108711538	1.98976	8.02191e-08	Xelaev18024610m	3.71987	0.0156654	akap12.L	3.87105	4.87e-19
			LOC108711583	-0.921701	0.0123025	errfi1.S	1.98752	0.000874314	gbx2.2.L	3.71405	0.00293748	cnrip1.L	3.87067	5.29e-06
			dock1.S	-0.926478	0.0353627	fgf20.L	1.98653	0.030446	dnajc12.L	3.71385	0.00771339	hrh1.S	3.86932	0.0310968
			disp1.S	-0.927243	0.0460768	tfec	1.98123	0.00248206	rerg.L	3.71323	0.00775184	LOC108698354	3.86774	0.00746863
			maea.S	-0.927611	0.0222294	gpx2.S	1.974	0.00441381	mcf2l	3.70548	5.93e-18	irs2	3.86422	6.6e-05
			xk	-0.927648	1.58e-05	tvp23a.S	1.97383	0.00423421	st5.L	3.70348	0.0111602	myo1d	3.86355	0.00303105
			ptpn14.L	-0.929724	0.040314	atoh1.L	1.97129	0.00181918	t2.S	3.69674	0.0036163	shox2.S	3.86234	0.0353158
			per2.L	-0.930791	0.0165696	cebpa.L	1.96569	0.000124224	Xelaev18019814m	3.69546	0.00142523	pcdh8l.L	3.86194	0.0249042
			ano5.L	-0.937912	0.0440766	Xelaev18024001m	1.9637	0.0128817	dock11.L	3.69525	0.0362704	akap6-like.S	3.85541	4.3e-05
			kirrel2.L	-0.939523	0.00250719	LOC108705105	1.96353	0.00395835	sparcl1	3.695	0.00884323	plekho1.L	3.85484	7.25e-08
			sbf2.S	-0.954195	0.00779249	Xelaev18040986m	1.95804	0.0254104	slc4a3.L	3.69399	0.00158284	prdm1.S	3.85187	1.18e-27
			msi1.L	-0.95447	0.00800211	LOC108705899	1.95747	0.0107774	Xelaev18003284m	3.69068	0.0025097	Xelaev18019814m	3.85158	0.015612
			rogdi.S	-0.955073	0.046141	pax3.S	1.95718	0.002926	tmeff2.S	3.68361	0.0121779	znf710.L	3.84709	3.37e-09
			arhgap26.L	-0.961262	0.0125303	loc108648340.L	1.95089	9.17926e-05	lipc.S	3.67744	0.0436469	strip2.L	3.84416	1.2e-05
			ptprf.S	-0.961929	5.18e-06	ig100492381.L	1.95022	0.0144837	LOC108719531	3.67647	3.8e-10	prdm14.L	3.83687	2.94e-06
			csrnp1.L	-0.964644	0.0349474	stc1.L	1.94846	0.000253504	zic5.L	3.67638	1.68e-09	igfbp1.L	3.83564	0.0316946
			pdxdc1.L	-0.970427	0.010019	mras.L	1.9483	0.00231182	parp12	3.66875	8.8e-11	tRNA-Ser	3.83386	2.18e-06
			psmb6.S	-0.97509	0.0460768	LOC105945479	1.94704	3.58828e-06	znf33a.L	3.66833	7.12e-23	LOC108714223	3.83123	0.0290354
			kif3a.S	-0.978127	0.0125473	sfrp2.L	1.94506	0.00111136	pnmt.S	3.66742	0.0156654	carmil3	3.82862	5.07e-07
			znf217.L	-0.980252	0.00578554	cacna1b.L	1.94237	0.00627463	Xelaev18036143m	3.66621	0.017623	eomes.L	3.82842	0.00258084
			muc5acl.S	-0.986299	0.00149351	slc24a5.S	1.93916	0.00515535	upp2.L	3.66547	1.11e-07	mybl1.S	3.82342	0.000301312
			rpl37.L	-0.989983	0.0134365	caps2.L	1.9352	0.00473121	Xelaev18012392m	3.65345	0.0234634	fgl1l.S	3.82341	0.0387942
			ndst2.L	-0.993571	0.0123025	cdkn2c.S	1.93515	2.09141e-06	LOC100489326.S	3.64849	0.00161968	stc1.L	3.82169	0.000341437
			dact1.L	-1.00072	0.0139268	map3k14.S	1.92904	0.00474102	mei1.L	3.64615	0.0443146	phox2b.S	3.81906	0.00598662
			mrps35	-1.00416	0.0115821	upp2.L	1.92793	0.00010305	mctp1	3.64207	0.000114509	dennd2c.S	3.81814	1.77e-05
			apcdd1.L	-1.00601	0.0192473	cebpd.S	1.92574	0.000121303	ccn2	3.64136	0.000158862	Xelaev18023727m	3.80673	0.00020391
			tjp2.S	-1.00718	0.000169338	itgb4.S	1.92378	0.000322634	grin3a.S	3.6399	0.02709	LOC105945479	3.80665	3.15e-05
			ubtd1.S	-1.00794	0.00155246	sertad1.L	1.92025	0.0073689	Xelaev18002160m	3.63781	0.00142906	ankrd6.L	3.80389	0.000615005
			il17rd.L	-1.01828	0.000578158	olig2.L	1.91638	0.0040487	zic2.S	3.63412	3.5e-21	mfap2.L	3.80027	0.00258084
			fnip2.S	-1.03733	0.0240358	parp6.L	1.91444	0.00361281	slc16a9.L	3.62608	6.34e-12	khnyn.S	3.79998	0.0380405
			fgd4.L	-1.0403	0.0206004	tbx15.L	1.91433	2.9384e-06	tpbg.L	3.62569	6.55e-18	nog.S	3.79832	0.0189939
			tmbim1.L	-1.0416	0.0172406	xrra1.L	1.91273	0.00486363	LOC108697620	3.61783	0.0332665	myod1.L	3.79219	0.00959881
			stx19.S	-1.04695	0.0284459	Xelaev18041975m	1.90581	4.8047e-05	fn3k.L	3.61162	2.52e-07	tmprss9.L	3.7916	0.000833667
			sh2d3c.L	-1.04803	0.0260148	fzd1.L	1.90424	0.00819473	LOC108698353	3.6099	0.00370121	flt1.L	3.78896	0.00818411
			ubl3	-1.05133	0.0123025	cep350	1.90108	0.000588596	Xetrov90020492m.L	3.60982	0.00185696	slc25a16.L	3.78667	0.000977047
			nfatc3.L	-1.05335	0.0231724	havcr1	1.90103	0.0478358	grpel2.S	3.60689	8.55e-18	doc2a.S	3.7766	0.00580681
			gclc.L	-1.06728	0.028144	Xelaev18036449m	1.90022	0.0227904	st8sia3.S	3.60084	0.0419106	st5.L	3.77011	0.046257
			drc1.L	-1.0731	0.0254373	Xelaev18000460m	1.89984	2.17159e-06	Xelaev18012200m	3.59288	0.0123049	ambp.S	3.76998	0.00101757
			xvent-2b	-1.07751	2.53e-06	crx.L	1.8997	0.0451507	rimkla.L	3.59226	6.14e-10	Xelaev18030606m	3.76642	0.00309682
			stxbp1.L	-1.09456	0.0456217	LOC108703754	1.89929	2.31518e-05	Xelaev18005955m	3.58872	0.00444918	lif.S	3.76188	0.0149052
			fhl3.L	-1.09899	0.0284459	neurl1.S	1.89817	0.0377817	LOC108702848	3.58574	1.09e-15	pcdh11x	3.76179	5.76e-06
			LOC108718648	-1.09944	0.0231724	fam124b.L	1.89719	0.0086205	npr2.S	3.58185	0.00080846	Xelaev18047094m	3.75829	0.0368731
			rere	-1.10074	0.0180199	Xelaev18046094m	1.89631	0.0136423	ripk2.S	3.57657	0.00879014	Xelaev18046094m	3.75348	0.000169065
			ttc39a.S	-1.102	0.033213	Xelaev18003821m	1.89134	0.0499609	rph3al.S	3.57622	0.00849521	LOC108719096	3.7534	0.0134158
			hipk2.L	-1.10757	4.37e-05	fzd8.S	1.88969	3.80557e-06	sertad1.L	3.57299	1.34e-06	LOC108711408	3.75196	0.00113549
			gga1.L	-1.11193	0.00216871	LOC108705810	1.88676	4.82964e-06	il27ra	3.56876	0.00779248	mapk8ip2.L	3.74883	0.0008727
			mxi1.S	-1.12085	0.00956514	cbarp.L	1.88574	9.57774e-05	Xelaev18021692m	3.56745	0.0226057	LOC108705740	3.73946	0.0262793
			ankrd50	-1.12148	0.0450011	neurog2.S	1.88564	0.0102685	crx.L	3.56362	1.69e-08	c3	3.73663	0.000679008
			rhou.L	-1.12519	0.0117625	slc5a2.L	1.88489	0.0159399	fgf20.S	3.56358	0.00741723	hoxb6.S	3.72754	0.0202716
			notch1.L	-1.13438	0.0160686	ldlr.L	1.88352	0.00132337	nkx2-2.S	3.5618	0.000743034	MGC82544	3.72561	7.73e-05
			vangl2.S	-1.13844	7.98e-05	znf628.L	1.88329	0.00175093	dlgap2	3.56064	0.000385867	LOC108697464	3.72147	0.00438029
			slc44a4.S	-1.14687	0.0437143	cldn5.S	1.88244	0.000336997	myod1.L	3.56011	4.69e-06	upp2.S	3.71889	0.000657724
			scube2.L	-1.14788	0.0483361	wnt7a	1.87755	0.00402189	thbs1.L	3.5592	1.32e-16	LOC101734090.L	3.71514	0.00173463
			notch1.S	-1.15236	5.2e-08	LOC108716545	1.87568	0.0100441	Xelaev18042341m	3.5517	1.82e-06	srpk2.S	3.71282	0.00415292
			meis3.L	-1.15304	0.0349116	gjb2.L	1.8705	0.000177404	qrfpr.S	3.54949	0.0235656	foxc2.S	3.70759	0.0346957
			lin28a.S	-1.1594	0.0286685	LOC108697411	1.86873	0.0471186	slc38a8.L	3.54874	0.000281687	LOC100496010.S	3.70514	0.0274877
			tfap2c.S	-1.16569	0.00961338	LOC108709387	1.86696	0.000169561	nrn1.L	3.5487	0.00120402	moxd1.S	3.70504	0.000896571
			impa1.L	-1.1668	0.0231724	braf.S	1.86427	3.64909e-06	itga1.S	3.54866	0.00609456	LOC108710848	3.70421	0.0162419
			fam124a.L	-1.174	0.0254373	mybl1.L	1.86326	0.0253206	LOC108705860	3.54717	0.000463802	cd3e.L	3.70306	0.000492416
			pla2g6.L	-1.17446	0.0332982	socs4.L	1.86021	0.000406515	fst.L	3.5458	0.00792627	LOC108704735	3.69984	0.0248333
			slc66a1.S	-1.17926	6.55e-05	hist1h4d.L	1.85928	2.47388e-06	trim46	3.53836	1.49e-06	MGC68639	3.69477	0.0362545
			cdh4	-1.18082	0.028845	nedd4l	1.85863	0.00243668	lrmp.S	3.53669	0.00238	slc17a6	3.69334	0.024999
			tfap2a.L	-1.18447	0.0217143	c17orf58.L	1.85831	0.0124573	scrt1.S	3.53621	0.00260025	col11a1.L	3.69144	0.0230544
			foxred2.L	-1.18534	0.0370114	grpel2.S	1.85666	3.71864e-06	Xelaev18008846m	3.53598	0.0306249	fbn2	3.69033	0.0469028
			LOC108709581	-1.18643	0.0183288	cmpk2.S	1.85277	0.00614723	mob1b.S	3.53571	0.0177715	rap1gap.L	3.69031	0.00048965
			snap91.S	-1.19831	0.04196	ss18l1.L	1.85165	0.0244639	LOC108697464	3.5326	4.32e-05	rph3al.S	3.68203	0.0125806
			gse1.S	-1.20093	0.00107662	mab21l2.L	1.85009	0.00107996	parp12.L	3.52681	3.23e-14	nhs	3.68157	1.94e-09
			lnx2	-1.204	0.00335283	prkcd	1.8495	0.000325408	LOC108707235	3.52501	0.00989656	pxdc1.S	3.68132	0.0331832
			cyfip2.S	-1.20572	0.0150414	slc2a1.S	1.84776	8.19707e-17	ldlr.L	3.50544	2.51e-15	vtn.L	3.67649	0.00425958
			acvr2b.L	-1.20688	0.0206004	irs2	1.846	0.00200089	parp12.S	3.50476	0.046656	aqp3.S	3.67645	0.0204189
			nudt22.L	-1.22053	0.0237948	Xelaev18013159m	1.84535	0.000597493	tiparp	3.50283	4.21e-10	ptpru.L	3.67366	0.000330028
			ralgds.S	-1.22376	0.0462977	kcna3.S	1.84109	3.80148e-05	nt5dc3.S	3.50209	3.49e-10	Xelaev18014921m	3.66946	0.0162368
			LOC108710170	-1.22433	0.0179231	gbp6	1.83898	0.0424472	carmil3	3.49473	1.31e-08	pacs2	3.66499	0.00167842
			alpl.L	-1.23949	0.000167576	gramd1a.L	1.83767	0.0208703	ins	3.49472	5.22e-14	glt8d2.S	3.65926	0.000632675
			dpysl2.L	-1.24379	0.0254373	MGC115316	1.8312	0.0130344	Xelaev18036693m	3.48886	0.0158542	pdk4.S	3.65733	6.1e-07
			cerk	-1.24473	0.0442376	helz2	1.83004	0.00119939	vtga2.L	3.48837	0.0374416	trim25.L	3.65676	5.54e-09
			ubtd1.L	-1.27045	0.000839333	pcdh8.S	1.82661	0.00409367	foxc2.S	3.48443	5.63e-05	Xelaev18013325m	3.65587	0.0372408
			arhgap27.L	-1.27582	0.015634	slc3a1.S	1.82397	0.0306264	Xelaev18023727m	3.48004	3.74e-12	Xetrov90024734m.S	3.65068	1.4e-07
			mxi1.L	-1.28129	0.015634	prdm11.S	1.82253	0.030906	plb1	3.47869	0.00599286	itgb6.L	3.65015	0.00345895
			gpsm1.L	-1.28307	0.0106555	Xelaev18014048m	1.82119	8.92973e-06	LOC108699405	3.47595	0.0244294	ctgf.L	3.64986	4.7e-05
			ppp3r1.L	-1.29551	0.0217472	ptprh.S	1.8204	0.0132751	c3	3.47466	0.000922616	tiparp	3.64567	0.000926806
			klf2.S	-1.30492	0.000302124	LOC108695544	1.81977	0.00896214	dusp1.S	3.47239	1.34e-16	cacng4.S	3.64178	0.0255622
			LOC108700849	-1.31166	0.025314	Xelaev18002905m	1.81841	0.0247414	lmln	3.47138	0.00286323	sox17b.2.L	3.64109	0.00477101
			capn2.2.L	-1.32506	0.0378037	tlcd2.L	1.81753	5.67966e-06	masp2.L	3.46285	0.0170093	aplp1.L	3.6402	0.00982198
			tns2.S	-1.33695	0.0477864	LOC108705673	1.81691	9.3602e-08	loc432289.L	3.46207	0.0247867	sall3.S	3.64013	3.2e-09
			atf6.S	-1.34632	0.0205105	LOC108719063	1.81374	1.07611e-05	obsl1.L	3.45987	0.00713623	jund.S	3.6371	0.000749232
			LOC733426	-1.35018	2.56e-08	MGC68910	1.8128	0.0193986	LOC108713440	3.45613	6.66e-06	plxnd1.L	3.63472	0.0272847
			endou.S	-1.35537	0.0369223	Xelaev18023726m	1.81083	4.56708e-05	emilin1.S	3.45426	0.0464267	plekhg5.L	3.6342	0.000464434
			Xelaev18000128m	-1.35649	0.0176727	nt5dc3.S	1.80154	0.0164932	reep1.L	3.45391	0.0469983	atf3.L	3.62923	0.000182065
			elf1.S	-1.35698	0.0487767	LOC108704568	1.80128	2.23776e-06	LOC108699825	3.45045	7.24e-06	LOC108706071	3.62684	0.00916971
			bace1.L	-1.36727	0.00334796	n4bp3.L	1.79902	1.50001e-05	phlda1.L	3.44985	0.000812763	Xelaev18026908m	3.62683	0.0106933
			fam102b.S	-1.37491	0.0498522	fam46a.S	1.79634	4.47033e-05	jun.L	3.44351	5.39e-08	irx1.L	3.62314	1.42e-07
			nbr1.L	-1.37639	0.0119846	col4a1.L	1.79559	0.0048099	Xelaev18003991m	3.44278	0.0406702	slc43a2.S	3.62067	3.48e-14
			c3ar1.L	-1.38392	0.0362685	myoc.L	1.79238	0.0456876	LOC108713439	3.44001	0.0490169	phlda1.L	3.61869	0.00540232
			fgfr4.S	-1.38426	0.00459334	zbtb18.L	1.79205	0.0208861	Xelaev18002905m	3.42952	1.01e-05	Xetrov90019340m.S	3.61563	0.0226953
			itga6.L	-1.38939	0.00568685	LOC108719542	1.79149	0.00820685	fam3b.S	3.42807	2.1e-10	LOC108701852	3.61461	4.2e-08
			lin28a.L	-1.39123	0.000159189	LOC108703833	1.79109	2.2003e-05	inppl1	3.42623	0.00033893	irf1.L	3.61318	0.000157877
			eno1.S	-1.39904	0.00107662	arrdc2.L	1.79103	0.00348178	fosl2.S	3.42401	3.74e-09	fbxo32	3.61269	0.00564933
			cntn5.S	-1.40675	0.0287132	LOC108719529	1.791	2.64417e-10	fosb.S	3.42109	0.000245746	Xelaev18006755m	3.60769	0.0465998
			s1pr5.S	-1.4277	0.0287117	ints6.S	1.78553	3.37012e-07	Xelaev18015877m	3.41785	0.0333275	has3.L	3.60701	0.0390377
			grhl1.L	-1.43104	0.0198441	fam110c.S	1.78256	3.89632e-08	Xelaev18046094m	3.41592	9.24e-08	unc13d.L	3.59099	0.000833474
			MGC76328.S	-1.44621	0.00881461	LOC108719883	1.78161	0.00518008	ddr2.L	3.41541	0.00286954	LOC108711538	3.58867	0.00023752
			plcd3.L	-1.44658	0.00252334	btg5.L	1.77643	0.0183525	LOC108698417	3.40547	0.00147459	map3k12.S	3.58555	0.0003183
			slc25a37.L	-1.44842	0.0293428	LOC108699553	1.77619	1.24909e-05	slc38a2	3.4034	0.00530598	plekhg1.S	3.58294	0.000510793
			dlx5.S	-1.46267	0.000571056	nr4a1	1.77337	0.00241352	Xelaev18038843m	3.40217	0.0223417	LOC108703132	3.57384	7.01e-09
			xbp1.S	-1.46369	0.0198441	thbs1.L	1.77219	0.0297412	socs4.L	3.39922	1.79e-18	olig2.S	3.56113	0.000804477
			foxh1.2.L	-1.47919	1.98e-05	irf1.L	1.76924	0.0162556	rgs20.S	3.39823	0.0406505	arsk.L	3.56066	0.0468576
			bpgm.L	-1.48007	0.0357373	Xelaev18003021m	1.76404	0.00165438	LOC108711408	3.39691	0.00135946	il10rb.S	3.55367	0.00167957
			grhl3.L	-1.49029	0.00800211	LOC108717919	1.76377	0.00869249	hes3.S	3.39262	0.00791022	onecut3	3.54722	0.0399578
			frmd4b.S	-1.50631	0.0329044	LOC108719517	1.76218	2.22414e-06	chd5.L	3.39146	0.0215519	casp10.L	3.54365	0.00137296
			LOC108703977	-1.52203	0.0443439	LOC108708360	1.75615	0.0353439	Xelaev18033459m	3.39137	0.0061335	Xelaev18002449m	3.54254	0.000709495
			krt5.7.L	-1.53077	0.0446953	thop1.L	1.75249	0.0329459	rhbg.L	3.38594	0.0435276	gabrg2	3.542	0.038543
			kitlg.L	-1.53269	0.00578554	cdadc1.S	1.75237	0.00572301	myo18b	3.3827	0.00219739	fam57a.L	3.52655	0.0129464
			tp53i11.L	-1.54048	0.0346335	cmtm3.S	1.75114	0.0256644	LOC108704134	3.37989	6.25e-11	itga2b.2.L	3.52312	0.00890243
			tceb3.L	-1.54564	0.00102103	hist1h2ad.1	1.74819	0.0391999	cryba1.2.S	3.37983	0.00549321	filip1.L	3.52278	0.00281163
			has-rs.S	-1.55477	0.0231724	Xelaev18003910m	1.74448	0.000606765	etv7.S	3.3752	0.0340213	arrdc4.L	3.52128	0.000504484
			id2.S	-1.57766	0.000826777	sgk223.L	1.74362	1.78082e-08	akap6-like.S	3.37211	9.86e-11	nlgn2.S	3.51886	0.00484681
			rreb1.L	-1.58117	0.0105903	Xelaev18040848m	1.74013	0.00329391	Xelaev18034569m	3.37098	0.0247661	loxl1.S	3.51832	0.0461019
			klf5.L	-1.58177	0.0176727	kcna3.L	1.73738	0.0032299	pcdhac2.S	3.36997	0.00323399	cdk15.L	3.51423	0.00934737
			sh2d3c.S	-1.58524	0.0090437	sox1.S	1.73557	0.00479036	mast1.L	3.36941	0.000643049	shank3.S	3.5124	0.00353958
			slc38a3.S	-1.59574	0.0316652	hist1h1t	1.72883	5.63433e-06	il10rb.S	3.36412	8.94e-06	Xetrov90020492m.L	3.51055	0.0167736
			bag1.L	-1.61399	0.0360112	ror1.S	1.72637	0.00498131	LOC108705488	3.36403	0.0397133	hpgds.L	3.506	9.17e-06
			gli2.S	-1.61667	0.026981	relb.L	1.72526	0.0316439	chrd.L	3.36242	0.00210135	tmem169.L	3.50466	0.000298449
			cmip.S	-1.62491	0.000508994	zeb2.L	1.72208	0.00132337	cebpa.S	3.35945	1.58e-13	nat8l.S	3.50198	0.0195846
			tmcc3.L	-1.62962	2.76e-07	kank1.S	1.71882	0.00578048	upp1.L	3.35673	0.0267324	sox17a.L	3.50178	0.00937509
			arl4c.S	-1.63104	0.000438721	Xelaev18019801m	1.7102	0.0223135	ccser1	3.35343	0.00604839	bcl6.L	3.49427	0.027982
			tub.S	-1.63108	0.0339996	spsb3	1.70682	5.61338e-07	lamb2.S	3.35048	0.01888	atn1.L	3.47946	0.0213469
			znf217.S	-1.63374	0.0116102	txnrd1.S	1.70426	0.00224832	n4bp3.L	3.34637	1.05e-20	Xelaev18012200m	3.4748	0.035373
			s1pr5.L	-1.63765	0.00334796	rasl11b.S	1.70126	0.000324088	khnyn.S	3.34437	0.0198974	Xelaev18009885m	3.47353	0.00485775
			nrarp	-1.63854	0.000213383	LOC108704654	1.69942	0.0126864	Xelaev18011241m	3.34383	0.0112987	slc34a2.S	3.47122	0.0113034
			slc7a4.L	-1.65834	0.0214669	LOC108713742	1.69699	0.0489763	oscp1.S	3.3433	0.00211145	pla2g4d	3.46953	0.0140025
			LOC108705106	-1.66863	0.0207035	LOC108719557	1.69453	0.000303585	padi4	3.34032	8.15e-06	myh1-2-1.L	3.46949	0.0384249
			tfap2c.L	-1.66906	0.0248254	Xelaev18005946m	1.69035	2.3655e-05	LOC108704207	3.33423	0.000432767	LOC108700100	3.46871	0.00450107
			fdps.L	-1.67067	8.33e-06	MGC115291	1.68929	8.4265e-07	jchain.L	3.33332	0.00665485	rasgef1a.L	3.46734	0.000343506
			loc100492299.L	-1.67261	0.0100624	LOC108704262	1.68841	0.0131921	foxd2.S	3.33097	0.0156925	antxr2.S	3.46484	0.0137658
			amotl1.S	-1.70032	9.4e-06	nr2f2	1.6871	0.0437509	adam11.S	3.32986	0.0226057	nuak2.L	3.45955	0.00124234
			bend4.S	-1.70825	0.00338988	Xelaev18000217m	1.68572	1.51035e-05	LOC108698349	3.3276	0.00782375	phactr1.S	3.45856	0.0168254
			sgcg.S	-1.71032	0.00208596	rnd3.S	1.68225	9.11775e-05	arg2.L	3.32729	1.12e-07	fmnl2	3.45785	0.00452833
			arl4c.L	-1.71215	0.00159116	LOC108696874	1.67323	4.16945e-07	LOC101731668.S	3.32728	0.00817872	pcgf5.L	3.45633	0.0195499
			dsg2.S	-1.71422	0.0237948	ccdc171	1.66073	0.0120226	foxd4l1.L	3.32655	1.99e-06	LOC108719562	3.45365	0.00229971
			tsku.S	-1.71886	0.000288443	Xelaev18000483m	1.65879	0.0101758	sgk223.L	3.32423	8.67e-18	fam109b.L	3.44256	0.000101295
			zfp36l1.L	-1.72142	0.0120727	slc25a16.L	1.65284	0.00194241	fam124b.L	3.32381	0.0005201	LOC108703938	3.43733	0.0487286
			gfpt1.L	-1.7269	0.00965163	zbed6cl.L	1.65244	0.00230753	mgam.L	3.3189	0.0274963	tnfsf11.S	3.4311	0.0201146
			LOC100488689.S	-1.73412	0.00365698	steap3.L	1.65049	0.0136374	Xelaev18021704m	3.31769	0.00381238	Xelaev18009110m	3.42899	0.00622882
			ventx3.2.S	-1.73604	0.0197837	ccpg1.S	1.649	1.65092e-07	LOC108710848	3.30677	0.00217221	nsmf.L	3.42876	0.0471292
			MGC76328.L	-1.73949	0.0003362	tmem169.S	1.64847	0.00715405	hcn4	3.30607	1.34e-07	rergl.L	3.42442	0.0226925
			capn8.S	-1.74066	0.0305341	Xelaev18000592m	1.64501	0.000610147	cd4	3.3056	0.0361632	psat1.L	3.41989	1.24e-07
			kcnk5.S	-1.75507	0.00100982	trhde.S	1.64453	0.0208861	slitrk3.S	3.3011	0.00577151	ptch1.L	3.41625	1.78e-19
			fgfr4.L	-1.77209	0.00578554	fam13b.L	1.64367	0.0289728	ecm1	3.30092	0.0336096	znf578	3.41282	0.00700349
			itga3.L	-1.77403	0.04134	hivep2.L	1.63826	0.0225338	zeb2.S	3.30009	7.92e-05	LOC108704538	3.40898	0.0423776
			adcy9.L	-1.77719	0.0062836	LOC108704531	1.63384	0.0159568	LOC108712691	3.29959	0.00153235	slc3a1.S	3.40882	3.23e-07
			alox12b.S	-1.78296	0.00613776	Xelaev18021693m	1.63346	7.01378e-05	fgl1l.S	3.2993	0.0298673	Xelaev18003910m	3.40841	0.000853606
			LOC108715136	-1.7874	3.74e-05	sirpb1	1.63164	0.0261538	Xelaev18046473m	3.29519	1.76e-05	sp5l.S	3.40799	0.000600441
			arg1.L	-1.81394	0.0195016	fam46a.L	1.63154	1.40538e-05	Xelaev18002449m	3.29059	0.00701999	LOC108700085	3.40693	9.06e-05
			LOC108712697	-1.83424	0.00566584	LOC108719531	1.62633	0.0174499	LOC100337617	3.28945	0.000136535	eif2ak2	3.40281	0.0134988
			MGC84586	-1.87925	4.61e-09	ptges2.S	1.62454	0.0363332	Xelaev18029191m	3.28606	0.000419467	hcn4	3.39875	0.00113273
			mmp14.L	-1.93766	0.0325407	rflb.L	1.61948	0.00498131	Xetrov90019524m.L	3.28374	0.0332177	farsb.S	3.39225	0.0228166
			adad1.L	-1.94429	0.0302226	stard5.L	1.61665	0.00132337	plekhg1.L	3.27769	1.49e-27	acot8.S	3.38839	0.00944325
			hs3st1.L	-1.94645	0.00489002	slc16a9.L	1.61128	0.0105391	htra3.L	3.27691	0.00571647	slc47a2.S	3.38809	0.0410419
			xzar2	-1.96802	0.0137997	hist2h2ab.L	1.61117	0.00103896	spry2.S	3.27323	5.12e-08	slc6a15.S	3.38371	0.0350463
			kcnk5	-1.97387	0.000158487	ptgfrn.L	1.60689	0.0139335	dennd2c.L	3.27054	1.06e-12	clip2.L	3.38258	0.00622882
			foxi4.1.L	-2.0052	0.0186897	ND5	1.60466	0.00596858	c17orf58.L	3.26978	0.000168228	reln.L	3.38126	0.0146432
			znf512b.S	-2.00805	4e-06	LOC108703763	1.60399	0.000138593	cpt1b.L	3.26866	0.022711	slc20a1.S	3.38041	2.34e-15
			rreb1.S	-2.0151	0.00140685	rel.L	1.60028	0.00132337	LOC108708906	3.26378	0.000640435	sertad1.L	3.37659	0.00570028
			MGC81482	-2.01888	4.24e-06	LOC108719558	1.59971	1.53957e-06	LOC108719562	3.25864	2.64e-13	c2orf69.S	3.37549	0.00457173
			id2.L	-2.02164	5.76e-06	cdk5r1.S	1.59872	4.08489e-05	tnfsf10.S	3.25818	0.00409357	a2m.S	3.37255	1.85e-09
			Xelaev18000521m	-2.03508	0.0329044	LOC108698109	1.59551	0.00222509	cdx1.L	3.25414	4.24e-05	nkx6-2.L	3.37115	0.00987294
			slc7a8.S	-2.04078	0.0032701	sp7.L	1.59492	0.00107996	nt5dc4.L	3.25185	0.00898257	mybl1.L	3.36692	0.0113509
			prdm1.L	-2.04576	0.00158532	LOC108714950	1.59174	3.60155e-06	LOC108715923	3.2482	0.0072179	znf33a.L	3.36583	0.000265053
			grhl1.S	-2.05575	0.0047832	zfand4.S	1.59072	0.00542401	loc108648340.L	3.24696	0.0401166	itgb4.S	3.36539	0.00108641
			dll1.S	-2.07556	0.0032701	klf15.2.L	1.59015	8.78202e-07	Xelaev18000592m	3.23927	2.61e-11	rimkla.L	3.36237	0.00112399
			fhod3.L	-2.08858	0.0431108	nuak2.L	1.58863	0.000108629	Xetrov90023655m.1	3.23907	5.83e-08	dlk2.S	3.36124	0.00394176
			col18a1.L	-2.09678	0.00951938	relb.S	1.58384	0.0144377	tnfsf15.S	3.23864	0.0211732	myh6.L	3.36054	0.0363956
			gprc5b.L	-2.13145	0.00236168	Xelaev18039004m	1.58105	0.00914982	upp2.S	3.23469	6.7e-08	dlgap2	3.35434	0.0271427
			smad7.S	-2.13171	0.000233493	flrt2.S	1.57629	0.00247815	LOC108700100	3.22991	2.18e-07	epha4.L	3.35188	1.51e-09
			Xelaev18005463m	-2.1455	0.0312413	asah1.L	1.5748	0.023451	prickle1.L	3.22947	0.00393192	pros1.L	3.35156	0.000985056
			smad7.L	-2.17197	2.23e-05	sox21.L	1.57288	0.011895	gal3st4-like.2.L	3.22873	1.86e-05	Xelaev18006019m	3.35073	0.000853606
			dlk2.S	-2.17877	0.0173939	map1lc3b	1.57205	0.010216	nt5dc3.L	3.22463	0.0033395	Xetrov90018873m.S	3.3501	0.00931337
			frmd4b.L	-2.20144	4.92e-11	dusp8.S	1.57102	0.0104646	trnaq-uug	3.2231	0.032247	adam19.S	3.34613	0.00710571
			LOC108712538	-2.20632	2.82e-06	dand5.S	1.56468	0.0376776	ca7.L	3.22065	0.0294184	Xelaev18041975m	3.34161	0.000237866
			Xelaev18011395m	-2.22028	0.0263268	crem.L	1.56213	0.000117957	Xelaev18006755m	3.21909	0.0035794	dhh.S	3.34052	0.00142197
			pkp3.S	-2.22346	0.00207592	Xelaev18029244m	1.55691	0.0393089	adh5.S	3.21906	0.000159503	urgcp	3.33978	0.00409881
			anxa4.S	-2.22912	0.0373966	iqsec3.S	1.55549	0.0355706	LOC108713703	3.21846	0.00593089	fbn2.L	3.33742	0.0363956
			mkx.S	-2.2464	0.0474705	rest.S	1.55328	0.0143574	irf7.L	3.21817	0.000323366	lag3	3.33022	0.0272783
			slc25a24.S	-2.24782	1.76e-05	LOC108703819	1.55248	0.0016139	Xetrov90026057m.L	3.21736	0.00112785	foxc2.L	3.32835	0.0189049
			tfap2a.S	-2.24815	0.00045688	dchs1.S	1.55008	0.00445767	cux2.L	3.21427	0.0201808	fos.L	3.32455	0.00780778
			rhou	-2.2499	1.74e-08	LOC108716586	1.54861	0.037496	egr3.L	3.21042	0.0335474	tmcc2.S	3.32326	0.0096578
			uts2r	-2.25051	0.034089	tiparp	1.54063	0.0242102	clu.L	3.20994	0.0181249	klhl23.L	3.31963	0.00500008
			lmo4.2.L	-2.27786	0.0005056	dstn.L	1.53978	0.0086989	dennd2c.S	3.20421	6.11e-22	c8orf34.S	3.31258	0.00450107
			thnsl2.L	-2.2947	3.3e-05	otud4.S	1.53912	0.000448159	ssh2.L	3.19661	0.000130372	MGC115291	3.31085	1.53e-05
			fam131a.L	-2.34197	4.24e-08	pgm1.S	1.53678	0.000195443	nxpe3l.6.S	3.19519	0.0384816	igsf3	3.30984	0.0468572
			dll1.L	-2.34761	0.00170466	LOC108704231	1.52755	0.00474952	Xetrov90012224m.S	3.18066	0.0164911	esam.S	3.30706	0.0362871
			fzd6.L	-2.366	0.00714053	zbtb21.S	1.52135	0.000458024	LOC108717371	3.1802	0.00625503	gtf2ird1.L	3.30692	0.0207756
			Xelaev18024706m	-2.40736	0.0478754	LOC108707642	1.51873	0.00223108	ptch2.L	3.17937	2.08e-11	plekha2.S	3.30363	0.0146265
			klf17.L	-2.41546	8.59e-08	loc100145274.L	1.51724	0.0346014	slc26a5.S	3.17907	0.0362203	spred1	3.30254	0.0145118
			lmo4.2.S	-2.41696	1.05e-05	sox9.L	1.51227	0.00477648	mxra8.S	3.17779	0.0236661	pts.S	3.30199	5.96e-07
			s100a2	-2.45831	0.00160525	ypel5.L	1.51177	0.00253138	errfi1.S	3.17728	1.13e-05	prrt1.L	3.29943	0.00556331
			bbox1.S	-2.46799	0.000698916	vim.S	1.50894	7.45738e-05	LOC108696174	3.17329	0.000396715	adcy4	3.292	0.000750017
			adap1.L	-2.48001	0.00779249	ptch2.L	1.50881	0.00177462	LOC105945479	3.17313	2.23e-16	fzd7.L	3.28261	1.67e-07
			LOC108717369	-2.50129	0.00334796	sp6.L	1.50754	0.0278611	psd4.L	3.17083	1.99e-06	LOC108719086	3.28251	0.0291818
			msx2.L	-2.52103	0.0121251	rnf182	1.5068	2.79226e-06	tvp23a.S	3.16933	0.00629353	cry2.S	3.28165	0.0125645
			asic2	-2.55446	0.0127845	dchs1.L	1.50338	0.0023572	pclo.S	3.16768	0.035469	arrdc4.S	3.28029	0.00597527
			msx2.S	-2.57399	0.000422898	LOC108700186	1.50149	0.00839072	xrcc3.L	3.1659	0.0071244	abcc8	3.27897	0.000231235
			fam110c.L	-2.59074	1.41e-12	tcim.L	1.49783	0.00408531	tet3.S	3.16567	0.00644356	cebpa.S	3.27847	0.00108897
			slc25a4.L	-2.59216	0.0408117	LOC108696320	1.49269	0.00200183	cyp26c1.L	3.1656	0.00324878	nkx2-8.L	3.27629	0.00972036
			apcdd1.S	-2.59442	0.0129303	prrt1.L	1.48834	0.00259416	Xelaev18032989m	3.16556	4.62e-07	Xelaev18002905m	3.27557	0.0133404
			ventx3.2.L	-2.60206	0.020232	mblac2.L	1.48795	0.0165366	trpm7	3.16251	0.00339337	slc38a2	3.27301	0.0256918
			klf2.L	-2.6749	2.08e-13	scamp5.S	1.48677	0.000263345	sall3.S	3.16247	5.5e-19	znf585b.S	3.27188	0.000592565
			fam212a.L	-2.67832	3.66e-09	mgc69520.S	1.47835	0.00221497	Xelaev18010530m	3.16045	0.00161195	LOC108707235	3.27126	0.00732025
			dlx3.L	-2.68614	0.00140685	LOC108717350	1.47697	0.000210043	cry2.S	3.16022	2.2e-08	Xetrov90019524m.L	3.26912	0.0123799
			MGC147188.L	-2.68633	0.0159968	lrig3.S	1.47559	9.0747e-07	Xelaev18040055m	3.15988	8.76e-05	gprc5c.L	3.2685	0.000345934
			hes3.S	-2.73772	1.11e-07	baz2b.L	1.47514	0.0353221	LOC108714611	3.15779	0.0279861	adgre5.L	3.26796	8.24e-08
			MGC86483.L	-2.75546	0.000995615	pdp1.L	1.47479	2.04564e-05	plcg1	3.15679	0.0187191	pcdh18.L	3.2613	6.59e-08
			lrrn1.L	-2.79199	0.000288545	Xelaev18032676m	1.47476	0.0123431	onecut3.L	3.15411	0.00136763	tet3.S	3.25969	0.00220153
			fam167a.S	-2.92095	0.0452746	pfkfb3.S	1.47452	1.75102e-06	dnah2.L	3.15369	7.52e-08	rnd3.S	3.25693	0.00204016
			elavl3.L	-2.97856	3.98e-08	Xelaev18018096m	1.47247	0.0196462	itga2b.2.L	3.15163	0.0323238	onecut3.L	3.25433	0.0436499
			cacna1d	-2.99657	0.0199228	LOC108708942	1.45795	0.045989	avil.L	3.14865	0.0271625	kmo.L	3.25346	0.00140328
			klf4	-3.04629	6.09e-05	pim3.S	1.457	1.8005e-06	slc6a5.S	3.14501	0.0269288	Xelaev18021693m	3.24943	0.000180335
			mss51.S	-3.05205	0.0362685	LOC108716019	1.4533	2.72499e-05	cftr.S	3.14403	0.0143042	kbtbd11.L	3.24715	0.0231774
			vgll4l.S	-3.07039	4.53e-07	MGC131307	1.44837	0.0206102	Xelaev18042342m	3.13986	0.0261824	ldlr.S	3.24595	0.00307045
			trim16.S	-3.07175	0.0394219	LOC108710897	1.44756	0.0295646	gsx1.L	3.1362	0.000138321	plekhg4.S	3.24409	0.00315276
			klf4.L	-3.07278	2.45e-16	foxh1.S	1.44693	0.00526743	hes7.1.S	3.12635	6.09e-06	LOC108706398	3.2435	0.00759032
			bmp7.1.L	-3.15925	0.0205249	nox1	1.44539	0.00109869	pfkfb3.S	3.12478	8.1e-20	Xelaev18020493m	3.24147	0.00936346
			stard13.S	-3.16523	1.74e-08	LOC108719459	1.44387	0.00633299	hsd11b1l.2.L	3.12461	0.00314588	LOC108716997	3.23972	5.2e-05
			sox18.S	-3.19662	8.27e-15	senp7.L	1.44356	0.00118883	LOC108697562	3.12035	0.0448815	limd2.S	3.23908	6.74e-06
			slc6a8.S	-3.20971	0.0205249	LOC108703767	1.44327	9.19736e-06	nedd4l	3.11903	6.17e-11	tmem221.L	3.23897	5.55e-07
			hesx1.L	-3.23386	5.1e-10	vps37a.S	1.4363	0.0405383	LOC108708942	3.11473	3.54e-06	mx1	3.23052	0.00633863
			id3.L	-3.33528	9.28e-37	loc100497555.L	1.43444	0.0380295	ptgfrn.L	3.11076	4.88e-07	nrap.L	3.22941	5.52e-05
			Xelaev18026345m	-3.34715	2.99e-05	pex11b.S	1.433	0.000441763	egr2.L	3.10783	1.35e-05	clcn2.L	3.22801	0.00392128
			stard13.L	-3.41171	8.9e-10	arrdc3.S	1.42985	1.54297e-09	Xelaev18003735m	3.10525	4.1e-07	sox1.S	3.22653	0.00187244
			Xelaev18017809m	-3.42616	0.000678403	zcchc3	1.42927	4.46779e-06	shox2.S	3.10409	0.00849521	fam46a.S	3.22526	0.00046883
			ventx1.2.S	-3.43657	2.58e-20	tmem57.S	1.42211	0.0423851	nfe2l2.L	3.102	5.86e-13	lpar6.S	3.21857	0.000141294
			dlx3.S	-3.47534	0.0228188	prickle1.L	1.42181	0.0108033	cd274.L	3.09933	8.95e-07	LOC108697295	3.21672	0.0086551
			LOC108701192	-3.5116	0.0173001	znf208	1.41896	2.46952e-05	acod1	3.0991	0.0392036	prdm1.L	3.20979	2.26e-08
			capn8.1.S	-3.51739	0.0349698	gtpbp6.S	1.41688	0.00113365	drgx.S	3.09166	0.0236232	kiaa1614.L	3.20831	8.32e-07
			foxi1.L	-3.53468	4.46e-09	pkn2	1.41625	0.00189872	p2rx5.L	3.08854	0.00208335	rfx4	3.20619	0.00722962
			id3.S	-3.59664	9.24e-48	gch1.L	1.40667	0.00891322	Xelaev18012845m	3.08853	0.00871303	mmel1.L	3.19656	0.000656526
			rnf151.L	-3.61531	0.0440728	sat1.S	1.40454	0.000901421	prdm14.S	3.08818	8.09e-20	cr1b	3.1924	1.82e-06
			dlx5.L	-3.619	2.71e-08	LOC100489074.L	1.40391	0.0337048	hivep3.L	3.0881	0.0169657	rbm20.S	3.19204	0.0051349
			bambi.S	-3.62664	2.6e-17	bcl6.S	1.40206	0.0226745	Xelaev18040126m	3.08515	0.00574076	adgrb2.S	3.1916	0.0215844
			c2cd4d.S	-3.68634	0.00564179	syt11.S	1.39892	0.030138	artn.S	3.08237	0.0492639	ppp2r5b.S	3.1889	0.0267047
			foxi4.1.S	-3.71263	3.07e-09	avpr1a.S	1.39349	0.0104373	padi4.S	3.08125	0.00131927	tha1p.L	3.18549	0.00113549
			fam212a.S	-3.78268	9.49e-11	fbxo46.S	1.39337	0.0249737	junb.L	3.08005	0.00582965	tnip2.S	3.1849	0.00136005
			LOC108715806	-3.79242	0.000446196	supv3l1	1.39269	0.00175131	cldn5.S	3.07879	5.5e-08	LOC108715923	3.18126	0.0474539
			ltk.S	-3.83937	7.9e-07	LOC108704201	1.392	3.59305e-05	olig4.L	3.07677	0.00175665	LOC108704180	3.17967	0.032216
			foxi4.2.S	-3.8476	2.42e-32	Xelaev18001384m	1.39147	0.001119	bmpr1b.S	3.07596	5.23e-06	bcl3.L	3.17699	0.00702634
			dlc.L	-4.05565	0.0151343	irg1.L	1.39072	0.0125985	acer1.L	3.07389	9.38e-07	Xelaev18023726m	3.17441	0.000978677
			bambi.L	-4.06568	1.02e-20	myd88.S	1.39015	0.000103625	nr2f2.L	3.06856	0.0219098	cdh5.L	3.17397	0.0457172
			igsf11	-4.06816	0.000296938	wee1.S	1.3849	8.20677e-05	tnfrsf6b.L	3.06804	9.65e-06	cdc42se2-like.1.L	3.17221	9.3e-06
			ventx1.1.S	-4.10615	3.39e-08	ccnb1.S	1.38041	0.0383753	plat.L	3.06132	3.71e-05	LOC108704661	3.17076	0.0397296
			p2ry2.S	-4.1232	0.000564943	cyld.S	1.37957	0.0432196	Xelaev18005971m	3.05988	0.000315294	btg5.L	3.16678	0.00508165
			Xetrov90024133m.S	-4.23971	0.025314	syt10	1.37807	0.00747151	scarb1.S	3.05986	4.94e-15	Xelaev18000190m	3.16387	0.0454496
			krt12.S	-4.37632	0.0425166	vsig10.L	1.37669	0.00624527	myl4.S	3.05942	0.0155465	acer1.L	3.1617	0.0199518
			LOC108703739	-4.41255	0.0032701	gcnt1.L	1.37447	0.0386046	LOC108711538	3.05502	2.26e-10	sgk223.L	3.16029	5.76e-10
			olfml2b.S	-4.50562	0.000267737	coq10b.L	1.37419	0.000132264	loc100145174.L	3.05435	0.033643	LOC108713440	3.15828	0.0174546
			sox18.L	-4.64885	0.000240817	cldn6.S	1.37094	0.0395694	ndnfl1.1.S	3.05356	0.00679304	fam46a.L	3.15359	0.000208406
			ventx2.1.S	-4.66941	1.08e-108	LOC108712667	1.37006	0.00806054	cmpk2.S	3.05338	0.000115622	tmem54.S	3.15236	0.0424596
			dbn1	-4.74504	0.0100532	fat4.S	1.36645	0.0274972	LOC108703938	3.05306	0.00018278	dram1.S	3.14156	0.0484827
			foxi4.2.L	-4.8827	9.12e-30	LOC108704260	1.36398	0.00348879	rasgrp2.L	3.04768	7.95e-07	traf4.S	3.13406	3.99e-05
			gata2.S	-5.09197	0.0035366	acod1	1.36118	0.00133287	LOC108703132	3.04663	9.25e-14	tor4a.S	3.13277	0.00348047
			gata2.L	-5.11715	0.00629488	lpar6.L	1.35859	1.04669e-05	pbxip1.S	3.04268	0.00147985	runx1t1	3.13099	0.00487361
			msx1.S	-5.15034	1.41e-08	slc16a6.S	1.35759	0.000213952	mamld1.S	3.03655	2.65e-05	tctex1d2.S	3.12309	0.0209044
			LOC108699375	-5.19623	0.0281916	lefty.L	1.35348	0.0321454	lrrc8b.L	3.03609	0.000172215	dhx58.L	3.12012	0.000584576
			cygb.L	-5.2861	0.0105595	c15orf39.L	1.35019	1.3319e-05	zfhx4.L	3.03562	0.00473605	LOC108719038	3.11686	0.00275965
			arhgap25.L	-5.31933	0.000498763	kiaa1614.L	1.34963	0.00476486	sh3rf3.L	3.03493	0.0142369	pcdh19	3.11528	1.11e-05
			cps1.S	-5.71661	0.0180199	LOC108709196	1.34901	0.0446821	slc5a1.2.L	3.03111	0.00139995	fam198a.S	3.1129	0.0106277
			hrh3	-5.81696	0.0280683	mtap.L	1.34659	0.00773523	fam26e.S	3.03011	0.0210722	tph1.S	3.11205	0.00158057
			szl	-5.98746	2.51e-23	insm1.L	1.34548	0.0198086	stx3.L	3.02989	0.000874926	Xelaev18005946m	3.1109	0.00204016
			ventx2.2.L	-6.16486	4.09e-91	plk3.L	1.34545	0.0331764	dram1.S	3.02287	0.0196458	fat4.S	3.10252	0.000551912
			foxi1.S	-6.31253	8.33e-06	pkn1	1.34326	0.0305364	tnn.L	3.02019	0.0193968	parp6.L	3.10219	0.00480949
			msmb.3.L	-6.41401	0.0247161	cdc42bpa.L	1.34302	0.00456904	myoz2.L	3.01531	0.002968	gli2.S	3.10183	2.3e-05
			kdrl.S	-6.74463	0.0268465	kctd9.S	1.33875	0.0493486	gm34653	3.01359	0.00715615	Xelaev18000217m	3.0974	0.00102571
			ventx1.2.L	-6.82389	1.29e-28	dhdds.S	1.33667	1.04669e-05	txnip.S	3.01338	7.7e-19	psat1.S	3.09712	1.03e-05
			dgkb.S	-6.99688	5.96e-05	fosl2.S	1.3366	0.0285392	LOC108704661	3.01191	0.0429904	LOC108707871	3.09655	0.0441539
			szl.L	-7.29669	2.08e-07	znf703.L	1.33469	0.00506076	strip2.L	3.00854	1.21e-06	edn2.L	3.09546	0.034173
			ephx4.S	-7.68776	0.0202174	LOC108705644	1.33418	0.0161727	f3.L	3.00215	5.57e-07	LOC100490918.L	3.09524	4.91e-05
			ventx2.1.L	-7.69039	1.95e-89	admp2.L	1.33367	0.00755721	zbp1.L	3.00057	0.0152696	scube2.S	3.09504	1.09e-08
			ventx1.1.L	-8.07315	1.79e-05	acod1l.L	1.33345	0.0100684	six2.S	2.99928	0.0469983	slc9a5.L	3.09497	0.0155615
			Xelaev18031172m	-8.65399	9.16e-08	rexo5.S	1.33079	0.00132472	snai2.L	2.99751	0.00197853	lhx5.S	3.09399	5.87e-05
			TF=16.2%			pabpc4.L	1.32912	0.00608711	mybl1.S	2.99704	1.34e-10	prickle4.S	3.08943	0.0342406
						dusp4.S	1.32686	0.0418817	loc100494211.S	2.99405	0.000165047	plekhg3	3.08668	0.00362851
						ago1.L	1.32525	0.0472717	bcl2l10.S	2.99076	2.05e-06	LOC108716549	3.08405	0.00564933
						slc26a6.L	1.32421	1.99878e-07	muc5ac	2.98966	1.61e-05	tmcc3.S	3.08274	1.08e-10
						ddit4.S	1.3239	0.000344236	ttn	2.98238	0.000188747	dusp1.S	3.0789	0.000115452
						tnik	1.32149	0.030166	col11a1.L	2.98215	7.01e-06	Xelaev18012845m	3.07882	0.0231613
						Xelaev18032628m	1.31673	0.00912155	prrt1.L	2.97642	1.52e-08	sfrp2.S	3.07773	1.78e-21
						LOC101243550	1.31184	0.0432196	fbxo24.L	2.97313	0.00051619	LOC108698396	3.07263	0.000149515
						bmi1.L	1.30741	0.00626653	LOC108704531	2.97079	0.00210985	frmd4a.L	3.07142	4.38e-08
						upp2.S	1.30629	0.0457316	ldlr.S	2.9693	2.08e-13	glul-like.1.L	3.07132	0.00107451
						spred1.L	1.30594	0.0306846	sacs	2.96901	4.13e-14	pbxip1.S	3.06296	0.000307323
						lix1l.S	1.30566	0.00916954	adam19.S	2.96891	0.00246446	LOC108719532	3.06293	0.0496251
						acy3.L	1.30321	0.00569129	plekhg5.S	2.96786	2.14e-06	LOC108704531	3.05981	0.0166141
						tctn2.L	1.30216	0.0168157	Xelaev18013481m	2.96042	0.031933	Xelaev18003635m	3.05494	0.00110218
						irs4.S	1.30053	4.17533e-06	pjvk.L	2.96008	0.0150074	dapl1.L	3.05404	0.000563143
						cars2.L	1.29651	0.0298489	LOC108704510	2.95833	0.0265952	f2rl1.S	3.04711	8.82e-06
						shroom1	1.29369	0.0199798	admp2.L	2.95418	4.88e-09	urah.L	3.04036	0.0251908
						pias1.L	1.29107	0.00463989	stard5.L	2.95314	1.21e-07	ikbkg.S	3.03079	0.0471358
						mtmr8	1.28987	0.0314051	clcn2.L	2.95251	5.15e-06	plat.L	3.02959	0.0134203
						kiaa1456.L	1.28784	0.0299003	stc1.L	2.95222	2.68e-08	syne2.2.S	3.02328	0.00031896
						dennd2c.S	1.28742	0.0178732	ltk	2.95134	4.72e-05	enoph1.L	3.01311	0.0316946
						tspan1.L	1.28353	0.0422008	cdx2.S	2.95075	0.0117501	st6gal2.S	3.0131	0.00622882
						LOC108719577	1.28049	0.0155558	adgre5.L	2.95012	3.04e-05	vcan.L	3.00722	3.42e-05
						sowahc.L	1.2799	2.46952e-05	LOC108706828	2.94386	4.84e-11	tmprss9.S	3.00677	0.00164134
						LOC108717895	1.27883	0.00677302	clip4.L	2.94214	0.0311383	dgat2.L	3.00573	0.000158126
						zic2.L	1.27787	0.00371342	LOC108696845	2.94205	0.000120602	gpr65.L	2.99929	0.00229971
						txnip.L	1.27688	0.00114154	tet3.L	2.942	0.0224075	txnip.S	2.99857	0.000958474
						LOC108699863	1.27629	0.000416657	tdgf1.1.L	2.93617	3.78e-07	LOC100492885.L	2.99776	0.00594491
						LOC108716734	1.27289	0.0457316	Xelaev18036489m	2.93609	0.0300681	nptx1.L	2.99745	0.010969
						hspa2.L	1.27147	0.00219269	flt1.L	2.93344	0.00426851	LOC100489554.L	2.99504	0.00123492
						rab11fip1.S	1.27053	0.00625722	rnf223.S	2.92457	0.039668	cxorf21.L	2.99001	0.0319611
						adrb2.S	1.27019	0.0238078	mapk8ip1	2.92274	1.3e-05	LOC108698553	2.98993	4.71e-05
						mybl1.S	1.26959	0.0451409	bach2.L	2.92204	0.0113828	fam102a.L	2.98897	2.52e-07
						tmcc1.S	1.26813	0.00487922	col4a5.S	2.92189	4.01e-07	pnkd.S	2.98091	0.00995162
						irx2.L	1.26684	4.17648e-05	phospho1.L	2.91922	0.0335553	sptbn5.L	2.98015	8.56e-05
						srebf2.L	1.26001	0.0158838	ntrk2.S	2.91667	0.00836727	tmem158.S	2.9797	0.0117974
						maff.L	1.25861	0.000844533	Xelaev18041975m	2.91631	1.46e-09	prnp.S	2.9781	2.19e-05
						e2f5.L	1.25728	0.0301382	col4a1.L	2.91617	5.93e-07	LOC108705860	2.97367	0.0377284
						spry2.S	1.25539	0.0381958	tnfrsf21.S	2.91283	0.0286013	Xelaev18008190m	2.96787	0.0496662
						jsrp1.L	1.25494	0.00210114	nox1	2.90983	1.97e-07	hsh2d.S	2.96178	0.0228587
						notch2.L	1.25478	0.0115441	LOC108716750	2.90971	1.4e-06	tectb.L	2.96053	0.0325843
						dhx58.L	1.25156	0.0161776	c10orf71	2.90935	0.00048561	znf503	2.95874	3.76e-05
						LOC108716538	1.24933	0.00699584	gramd1a.L	2.90831	3.57e-06	celf3.L	2.95843	0.00944325
						slc8b1.L	1.24676	0.0489883	pde4a.S	2.90697	0.011159	agtpbp1.S	2.95463	0.0164857
						itprip.L	1.24552	0.0023865	lamc2.L	2.90678	0.0035794	fos.S	2.95036	0.0229556
						LOC108707871	1.24017	0.0306185	Xelaev18001021m	2.90569	0.0214679	dchs1.L	2.94921	4.91e-07
						arrdc4.L	1.23825	0.00384735	LOC108719557	2.90321	1.5e-07	znf219.S	2.94797	7.47e-06
						spice1.L	1.23659	0.035596	sp7.L	2.90135	6.99e-13	clmn.S	2.94628	0.00557069
						cdc25b.S	1.23541	4.73413e-07	ror1.S	2.8929	3.25e-05	c9orf91.S	2.94537	0.0316011
						nfxl1.L	1.2337	0.0140653	lhx6.L	2.89206	0.00863593	nrcam.L	2.942	0.0497845
						mcf2l	1.23167	0.0324352	fam126a.S	2.89039	7e-05	dapl1.S	2.94174	0.000850507
						amd1.L	1.23128	2.09417e-05	LOC100488626.L	2.88894	0.00473605	LOC108704218	2.93638	0.00803563
						sema4b.S	1.22757	0.0208925	LOC101731753.L	2.88891	0.000368741	LOC108716723	2.93615	0.00848155
						LOC108716539	1.22714	0.000754284	ppp1r3c.1.S	2.88865	0.000155029	itga4.S	2.93485	0.032999
						ackr3.L	1.22685	0.000157717	otop3	2.88836	0.0339339	ccdc3.L	2.93026	0.00732125
						arrdc2.S	1.22378	0.0258816	spry2.L	2.88596	2.87e-05	LOC108702593	2.92897	0.00050161
						znf362.L	1.22334	0.0309602	pde2a	2.88319	0.00336573	socs4.L	2.92589	3.91e-06
						dact3.L	1.2231	0.0419013	Xelaev18000337m	2.88309	0.00202141	hhex.S	2.92497	0.00688653
						irf2bp2.S	1.21742	0.000874734	LOC108704058	2.88046	0.00680406	zfp36	2.92228	0.0383837
						LOC108716727	1.21691	0.0306822	lamb2.L	2.87757	0.0196082	c17orf58.L	2.91907	0.0470556
						micall1.L	1.21238	0.0370484	gabra1.L	2.8754	0.00501893	LOC108704231	2.91906	0.000340032
						klf15.2.S	1.21162	0.00494395	dysf-like.L	2.87134	0.0160816	vmp1.L	2.919	3.23e-05
						surf1.L	1.21046	0.000849641	gyg2.L	2.86785	0.000446533	Xelaev18018282m	2.9181	0.00143066
						ints6.L	1.20978	0.00890577	LOC108700904	2.86681	0.00028687	mettl7a.2.L	2.9125	0.0146523
						zic2.S	1.20615	0.00126336	dusp14.L	2.86472	0.0189216	pfkfb3.S	2.91215	0.00137627
						kmt2e.L	1.20581	2.27019e-05	ryr3.S	2.86415	7.39e-05	LOC108696320	2.91099	0.000116602
						syde2.L	1.20431	0.00360176	Xelaev18026517m	2.86329	0.00594887	rin2.L	2.90705	0.00774799
						efcab14.L	1.20246	0.0451409	olig4.S	2.86285	0.000591654	lef1	2.90704	0.0352098
						ficd.L	1.19962	0.0168157	rel.L	2.86026	2.53e-12	ptpn13.L	2.90156	2.35e-16
						pou5f3.3.L	1.19931	0.00244299	phlpp2.S	2.86011	0.0118989	LOC108699825	2.89782	0.00303514
						LOC108695586	1.19581	0.0324348	pax5	2.85947	0.000165042	nab1.S	2.88957	0.00238947
						LOC108695555	1.19498	0.0138593	MGC115291	2.85825	4.54e-18	loc100496061.L	2.88841	0.0226859
						LOC108702355	1.19456	0.014027	LOC108706398	2.85819	0.000733124	gch1.L	2.88379	0.000172314
						pcdh10.S	1.19336	0.0175685	has3.L	2.85788	0.0493883	gabrr1	2.8816	0.0425706
						znf367.S	1.18873	0.0381958	unc79.L	2.85787	0.00113706	csf1.S	2.87822	0.0459806
						LOC108696623	1.18311	0.0498104	lrig3.S	2.85648	1.17e-29	nr4a1	2.8778	6.7e-05
						rmi1.L	1.1823	0.00469914	Xelaev18033393m	2.85616	0.0183386	socs1.L	2.87341	0.0220927
						aldh18a1.L	1.18067	0.00188787	gbx2.1.L	2.85516	0.00021393	kcp.L	2.87023	0.00119338
						LOC108703760	1.17935	0.0409027	znf410	2.85391	0.00426046	LOC108711024	2.86916	0.00298146
						plekhf1.S	1.17928	0.00730057	tubb6	2.85285	0.0211734	Xelaev18032100m	2.86719	0.0198582
						dck.2.L	1.17646	0.000939079	rap1gap.L	2.85092	2.35e-10	cars2.L	2.86707	0.0176766
						dlx1	1.17472	0.0379381	unc80	2.84958	0.0462467	slc5a2.L	2.86566	0.0121656
						loc100493164.L	1.17419	0.0242852	gramd2b	2.84852	0.00926066	Xelaev18003735m	2.86208	1.38e-07
						eya2	1.17351	0.0385032	sall2.L	2.84375	0.0352739	nova2.L	2.86125	4.05e-07
						dapl1.S	1.172	0.0128598	junb.S	2.84295	0.0191623	elavl3	2.8567	2.73e-08
						sall3.S	1.16663	0.035898	pigz.L	2.8428	0.0144044	itprip.L	2.85516	0.00238947
						stat1.L	1.16493	0.00776057	mapk8ip2.L	2.84252	6.72e-06	tmem169.S	2.85192	0.00175687
						LOC108704394	1.16455	0.00427594	Xelaev18021795m	2.83959	0.033022	Xelaev18005971m	2.8517	0.023253
						plekhn1.S	1.16142	0.0254763	fzd1	2.83613	0.00101212	MGC53786	2.84986	0.00153638
						cchcr1.L	1.15727	0.00373088	klhl23.L	2.83415	0.000910127	unkl.L	2.84603	1.17e-05
						LOC108704307	1.15486	0.00175846	LOC108716586	2.83376	7.57e-07	fgf8.L	2.84454	0.0123541
						LOC100036828	1.14788	0.000130106	slc5a3.S	2.83159	0.0234888	Xelaev18022293m	2.84202	0.000136639
						tmem64.L	1.14679	0.0499035	Xelaev18046472m	2.83085	0.00549142	Xetrov90023655m.1	2.83824	0.0121544
						tfap4.L	1.14642	0.000117957	clcf1.L	2.83082	0.00400344	umod	2.83729	0.000115105
						hlx	1.14303	0.026586	rnd3.S	2.83059	1.96e-06	abhd14a.L	2.83536	0.00677266
						rfx1.S	1.14162	0.00627463	Xelaev18021693m	2.82873	2.91e-10	fam3b.S	2.8327	0.0297558
						Xelaev18035319m	1.13819	0.0480439	colgalt2	2.82845	0.0401857	emilin2.L	2.83107	0.00616614
						klhl28.L	1.13807	0.000718826	iqca1.S	2.82674	0.0146894	LOC108704223	2.82997	0.000366797
						LOC108698739	1.13709	0.0014337	npc1l1.S	2.82533	0.0409599	il6st.S	2.82918	0.00158109
						LOC108703744	1.12878	0.0414253	Xelaev18029130m	2.82485	0.000567377	LOC108715416	2.8258	0.00208967
						chpt1.L	1.12603	0.0391556	Xelaev18003910m	2.82363	3.32e-09	fosl2.S	2.82541	0.00564933
						fosl2.L	1.12576	0.0208861	Xelaev18005946m	2.81974	5.62e-07	kiaa0355.S	2.82175	0.00275095
						arrdc4.S	1.12067	0.00928401	st3gal5.S	2.81741	0.00033248	f13a1.L	2.82078	0.0353831
						prkce	1.11891	0.0483912	hoxc13.S	2.81188	0.00033893	cyp26a1.L	2.81202	0.0207748
						recql4.L	1.11648	0.0159336	fgd1.S	2.81005	1.03e-19	nefl.S	2.81173	0.024359
						dync1li2.L	1.11294	0.0403576	havcr1	2.80625	5.56e-06	ceacam1	2.80424	0.0165698
						fastkd1.L	1.11126	0.0379141	LOC108700983	2.80232	0.00195597	scn2a	2.80362	0.000297735
						LOC108719569	1.10971	0.023275	ptpre.S	2.80062	0.0119625	mpzl2.L	2.8025	0.00940001
						slc8b1.S	1.10799	0.00569129	zfp36l2.1.S	2.80061	0.000382802	h1foo.L	2.79553	0.00219856
						LOC108708787	1.10728	0.0174863	sox21.L	2.80038	3.37e-08	sgsm1.L	2.79501	0.00106446
						gmppa.L	1.107	0.047716	lypd2	2.7956	0.000322036	ptprt	2.79477	0.00545074
						serpinh1.L	1.10207	0.00823402	nr1d2.L	2.7956	0.000625691	tex264.S	2.79439	1.13e-05
						LOC108706318	1.10162	0.0120314	itprip.L	2.79465	4.2e-09	Xelaev18012751m	2.79393	0.000307817
						rhob.L	1.10082	0.00185542	ras-dva1.S	2.79178	3.7e-11	st3gal2.1.L	2.79383	0.00449738
						mllt1.L	1.0997	0.000182964	akap12.S	2.78907	6.23e-08	LOC108712607	2.7892	0.0313962
						irs4.L	1.09518	7.13451e-05	mmp19.L	2.78766	1.29e-11	MGC84224	2.78429	0.00352014
						psat1.L	1.0935	0.000762884	esyt1	2.78751	0.0274251	casr	2.78142	0.0216134
						LOC108695562	1.09237	0.00724514	samd11.S	2.78693	0.0189429	LOC108704482	2.78079	0.0155562
						irs1.S	1.08851	0.00158581	fras1.S	2.7857	0.022321	LOC108709286	2.77385	0.0414228
						hist1h2bj.L	1.08459	0.0258547	tctex1d2.S	2.78212	0.027593	mab21l2.L	2.77265	0.0151319
						e2f1.S	1.08385	0.0182266	lefty.L	2.77948	2.79e-08	sox3.S	2.77017	1.4e-05
						znf101	1.08359	0.000581724	acod1l.L	2.77835	0.0376865	meis2.S	2.76901	0.0124999
						zcchc2.S	1.08049	0.0046824	tgm3	2.77101	0.0119615	arhgef6.L	2.76432	0.00225956
						rell1.S	1.07959	0.000517987	baiap2	2.76994	0.000348843	Xelaev18001991m	2.76348	0.0291109
						loc100127659.L	1.07799	0.0393479	Xelaev18032496m	2.76969	0.0143737	scgn.S	2.76303	0.0165698
						cep70.L	1.07638	0.0107924	moxd1.S	2.76951	2.64e-06	gprc5c.S	2.76064	7.93e-05
						rnf169.S	1.06845	0.0208925	dlgap3	2.7679	0.00405963	MGC115585	2.7603	2.52e-07
						usp53.S	1.06697	0.0219313	btg2.S	2.76614	6.68e-07	spire2.L	2.75349	0.00213174
						rabggtb.S	1.06677	0.047716	qrfpr.L	2.7609	0.00155817	gprc5b.S	2.75291	0.0104688
						syap1.S	1.06437	0.0250414	pth2r.L	2.75793	0.0472374	junb.L	2.75194	0.013723
						filip1.L	1.0638	0.0243361	Xelaev18006019m	2.75689	0.000310893	LOC108715723	2.7512	2.83e-07
						loc100145576.L	1.06184	0.0039709	Xelaev18030151m	2.75536	0.0255749	auts2	2.74749	9.77e-12
						tRNA-Met	1.06042	0.0196041	tspoap1.S	2.75415	0.0196934	faxc.L	2.74705	0.00570028
						sox11.S	1.05991	8.01034e-05	cldn6.S	2.75349	6.25e-12	mapkapk5.S	2.74671	0.0177267
						LOC108709818	1.05472	0.0401893	spry4.L	2.75163	6.26e-05	march8.L	2.74471	0.0010602
						mterf3.S	1.05425	0.000829373	anxa6.S	2.74946	0.0221965	LOC108718446	2.74335	0.000394698
						c19orf12.S	1.05421	0.034181	cnrip1.L	2.74919	1.95e-05	egr2.L	2.73425	0.0163041
						acsl6.L	1.0528	0.0164515	txnrd1.S	2.7464	1.69e-05	dpp10.S	2.73251	0.0390377
						lrrc8c.S	1.05173	0.0108215	hist1h3g.L	2.74605	1.23e-15	mms19	2.73097	0.00420872
						rnd3.L	1.04493	0.00443025	Xelaev18021689m	2.74525	0.00296008	artn.S	2.73022	0.0411154
						lrrcc1.L	1.04291	0.00627463	LOC108714950	2.74385	1.25e-09	pik3r5.S	2.72877	0.0255125
						loc733556.L	1.04252	0.0396115	Xelaev18003492m	2.74236	0.0386089	galr1	2.72402	0.0303071
						zfp36.S	1.04033	0.0483464	LOC108704223	2.74075	2.16e-06	f13b	2.72005	0.0110202
						oat.1.S	1.03954	0.0116875	bahd1.L	2.74052	1.37e-05	fgd1.S	2.71265	0.00127156
						fam13a.L	1.03913	0.0221338	glul-like.1.L	2.73795	0.0100661	usp54.L	2.7118	5.27e-08
						LOC108696832	1.03685	0.036844	cfap70.L	2.73602	0.0180615	Xelaev18023152m	2.71124	0.021316
						gmnn.L	1.03406	0.0011282	aqp3.S	2.73599	0.00349893	slc16a12.S	2.71033	6.46e-06
						pigh.L	1.03339	0.00529296	six3.S	2.73552	0.000104828	cldn3	2.70811	0.0449023
						rnf145l.L	1.03246	0.00950825	nlgn2.S	2.73482	0.0240682	Xelaev18023478m	2.70423	0.00737231
						crebrf.L	1.03128	0.0136423	arrdc4.L	2.73461	5.48e-09	mig30.L	2.70311	0.0253044
						actg1.S	1.02848	4.17533e-06	ldlrad1.L	2.73203	0.0299643	fmnl2-like.S	2.7031	0.00861409
						rnf219.L	1.02406	0.0343147	srms.S	2.73094	0.0148487	shroom3.L	2.70297	0.000163173
						spty2d1.L	1.02231	0.0109842	Xelaev18003635m	2.72801	1.29e-06	spon2.L	2.70279	0.024273
						arrdc3.L	1.01841	0.000271241	myh6.S	2.7276	7.63e-05	pnp.L	2.70101	0.00118809
						cnppd1.S	1.01754	0.0218895	slc12a5.L	2.72545	0.000159503	wnt11b.L	2.70058	0.0355942
						znf507.S	1.0136	0.00124181	c2orf69.S	2.72529	2.21e-07	kdr.L	2.70011	0.0162778
						herc2.S	1.01195	0.0147111	bcl2l10.L	2.72432	0.00217206	sds.S	2.69958	0.0144153
						LOC108702458	1.01145	0.00394166	hesx1.S	2.71586	0.0315336	upk2	2.69222	0.00160252
						LOC105945479.S	1.00763	0.0470004	LOC108704517	2.71582	0.0146297	kcnj11	2.69142	0.015832
						znf507.L	1.00111	0.0271986	fat4.S	2.70964	9.62e-09	faxc	2.68523	0.0484711
						h2afx.L	1.00029	0.0343565	srpk2.S	2.70759	3.95e-05	fyb.L	2.68374	0.0198056
						rab5c.L	0.99484	0.00635404	exoc3l2.L	2.70579	0.000156192	pfkfb3.L	2.68238	5.02e-06
						axin1.L	0.993834	0.0301974	LOC108708286	2.7022	0.0321177	spry1.S	2.67769	0.00394446
						bcl2l11.L	0.991879	0.0413335	mybl1.L	2.69785	0.00545713	LOC108699863	2.67652	0.00218337
						LOC108719510	0.990833	0.00631776	insig1.L	2.69623	0.000332593	thop1.L	2.67255	0.00441695
						tubb4b.S	0.987233	0.00924151	Xelaev18047094m	2.69533	0.000612659	znf710.S	2.67116	0.00359748
						LOC108698123	0.984978	0.0257552	LOC101243550	2.69322	2.25e-10	spry2.L	2.67016	0.00565753
						znf703.S	0.984966	0.0139015	fam46a.S	2.69319	4.39e-07	anxa6.S	2.66895	0.0422252
						btg3.L	0.980027	0.00441381	rgl2	2.68997	0.000567294	ptgfrn.L	2.66798	0.0191673
						cep164.L	0.979156	0.0403753	phactr1.S	2.68632	0.00183524	cdh23.L	2.66768	0.0426291
						mccc2.S	0.972188	0.00282699	gfi1.S	2.68493	0.0035018	neurl1b.L	2.66729	0.000936801
						hyls1.S	0.97107	0.0305199	LOC108696320	2.68487	3.09e-08	cmtm3.S	2.66505	0.00388538
						cldn6.1.S	0.965685	0.000227425	LOC108702384	2.67167	0.0153295	adcy4.S	2.66232	0.00423425
						fzd7.L	0.964127	0.00374376	bmpr1b.L	2.66871	0.00480491	nes.S	2.66171	0.0368219
						LOC108695567	0.961714	0.0233672	mmrn2.S	2.66589	0.0462467	rbm46.L	2.65875	0.00139958
						hes3.1.L	0.960198	0.0179868	b4galt6.L	2.66383	4.28e-05	arhgap4.L	2.65574	0.031764
						znf585b.S	0.947937	0.00677302	LOC108705987	2.6636	0.00255058	cldn6.1.S	2.65068	9.15e-05
						arhgap29.S	0.945025	0.000379053	spred1	2.6624	0.0231312	metrnl	2.64839	0.000663645
						hmg20b.L	0.944376	0.019046	dnhd1	2.66067	0.00126957	cldn6.S	2.64549	0.000340358
						susd6.L	0.944329	0.00168163	lpar1.S	2.65876	2.08e-08	loc100493164.L	2.64387	0.01973
						dusp6.L	0.943029	0.0328154	Xelaev18022293m	2.65381	0.00218869	pxylp1.S	2.63996	0.041494
						haus2.L	0.938132	0.0294501	fbxo46.L	2.65346	2.18e-05	hoxc13.S	2.63906	0.00247014
						ing4.L	0.937053	0.00823402	pts.S	2.65281	1.53e-08	dnajb4.L	2.63876	0.0419981
						tcf19.L	0.932061	0.00150805	plekhn1.S	2.65082	7.48e-11	sesn1.L	2.63775	0.00704043
						zfp729b	0.93189	0.0159568	LOC108703766	2.64987	0.00778963	ca14.L	2.63504	2.46e-07
						lats2.S	0.93071	0.0155558	fam109b.L	2.6467	3.04e-16	slc6a14.2.L	2.63503	1.37e-07
						h4c15	0.930115	0.00198296	Xelaev18014048m	2.64577	7.18e-10	lgmn.S	2.63143	0.00553763
						six4.S	0.927636	0.00679831	atp12a	2.64553	8.45e-07	nkx2-1	2.63086	0.0330233
						rsbn1l.S	0.926913	0.0229352	LOC105946344.L	2.63771	0.0359119	slc24a5.S	2.62943	0.00038954
						MGC82989	0.923992	0.00939382	il1r1.S	2.63727	0.014828	psd4.L	2.62743	0.0406247
						f2rl1.S	0.92389	0.033407	spred1.S	2.63722	0.0455232	grpel2.S	2.62574	2.56e-05
						lamp1.L	0.923314	0.00448523	gch1.L	2.63718	1.75e-09	znf577.L	2.62275	0.032473
						plpp3.S	0.921512	0.0152538	cdc42ep2	2.63689	2.06e-05	LOC108719479	2.6213	0.000143812
						n6amt1.L	0.915481	0.0104046	faxc	2.63571	0.0411011	sirpb1	2.62124	0.0120821
						tmem164.L	0.915079	0.0149017	cxcl8e.L	2.63397	0.00999321	nradd.L	2.62106	0.0149672
						pfkfb3.L	0.906621	0.00544419	socs2.L	2.63373	8.16e-07	pcsk5	2.61901	9.41e-05
						c6orf62.S	0.905831	0.00248539	loc100496061.L	2.63335	2.94e-05	kank1.S	2.61825	0.0366571
						pim3.L	0.904786	0.0108309	plcd4.L	2.62983	0.0343503	slc4a10.S	2.61442	0.0395516
						LOC108704248	0.900142	0.00427594	tenm1	2.62466	0.0196914	inf2.S	2.6117	0.0178455
						ankrd50.L	0.898352	0.0141636	dock10.S	2.62446	3.11e-06	prkch.L	2.61137	0.0300732
						Xelaev18038799m	0.896934	0.0497479	fbn2	2.62194	0.0105214	trank1.L	2.61055	0.0113527
						rasef	0.893651	0.0148069	tgds.S	2.61961	0.000174551	ccnb1.S	2.60758	0.0222859
						dgkd-like.S	0.891458	0.0109732	fbn1.L	2.61954	0.0128228	brap.L	2.60546	0.00304282
						epha4.L	0.890633	0.0146863	six3.L	2.61857	0.0057617	pou3f2.L	2.60339	0.00237435
						yaf2.L	0.888327	0.0331764	LOC108718446	2.61748	2.78e-13	il1rap.L	2.59761	0.0336489
						pi4k2b.S	0.878294	0.00800693	abcg4.S	2.61357	0.0450858	fras1.L	2.59745	0.00333303
						espl1.S	0.877333	0.0498837	fam57a.L	2.61157	0.0169026	rusc1	2.59643	0.0109867
						tiparp.S	0.876183	0.0186597	btg4.S	2.61002	0.00382483	epha7	2.59625	0.0216473
						znf238.2.L	0.874753	0.0293871	Xelaev18028100m	2.60936	0.0110348	slc26a6	2.59224	0.0215251
						lrrc14.L	0.873528	0.010216	zc3h12a.S	2.60788	0.0417598	tmem164.L	2.59202	0.00314208
						LOC108695579	0.871688	0.0335891	cbx4.S	2.59349	1.32e-05	pcdhga2	2.591	0.00737231
						pi4k2b.L	0.868998	0.00570475	Xelaev18019774m	2.59265	0.0183553	mtcl1.L	2.59001	0.0174867
						zfand5.S	0.868528	0.0404633	nradd.L	2.59068	0.0286518	fam131b.S	2.58528	0.0150166
						nfx1.S	0.867189	0.0478859	slc34a2.S	2.58464	0.0422407	ccdc85c.L	2.58378	0.0317946
						sgk1.S	0.863169	0.0403269	tbx1.S	2.58275	0.00251417	nuak2.S	2.58307	0.0169874
						bloc1s6.S	0.861231	0.00520716	timp-1.S	2.58243	0.01628	LOC108701252	2.58264	0.0176315
						marveld2.S	0.859198	0.030906	dand5.S	2.58158	0.000271267	hlx	2.5823	0.0321624
						pphln1.L	0.856099	0.0186749	hic1.L	2.58109	0.02479	sox11.S	2.58055	0.000347347
						slc1a5.S	0.853529	0.000655367	scn5a	2.58045	0.0084963	Xelaev18046472m	2.57877	0.0139692
						sp5l.L	0.852058	0.0382336	dmp1	2.58036	0.00800246	Xetrov90020553m.S	2.56856	0.010969
						zbtb8a.1.S	0.849112	0.0343565	LOC108716997	2.57733	0.000720528	socs3-like.1.L	2.5623	0.0117567
						loc100144286.L	0.848584	0.0232225	LOC108707645	2.57644	0.000576408	trim7.L	2.56222	0.0155201
						prkar1a.S	0.847389	0.0467397	irf1.L	2.57535	0.000323811	atp8a1.S	2.56206	0.0113595
						syde2.S	0.846192	0.0461839	star.L	2.5722	0.0200388	nsmf.S	2.55679	0.0156637
						LOC108701258	0.844854	0.0496256	pde3a.L	2.57161	0.0432664	fgd6.S	2.55652	0.0155742
						ncstn.L	0.840688	0.015964	kmo.L	2.56922	5e-06	hs3st3a1.S	2.55444	0.00155058
						asmtl.L	0.837664	0.0208246	cyp26b1.L	2.56729	0.00557946	znf219.L	2.5532	0.000128119
						gucd1.S	0.829298	0.0155558	slc6a15.S	2.56565	0.00194159	rev1.L	2.55117	0.000272549
						dhdds.L	0.820885	0.0147067	ltbr	2.56208	0.000626312	chst2.S	2.55099	0.013723
						LOC108704254	0.818892	0.0284662	c1orf198.L	2.56159	0.0244548	scube2.L	2.54808	0.00405026
						edc3.L	0.81437	0.0253877	map1lc3b	2.55969	1.23e-07	Xetrov90005150m.S	2.54408	0.00550513
						ndufaf4.L	0.812722	0.0235807	nr3c2.L	2.55837	0.0487025	parp2.L	2.54408	0.0220414
						slc25a34.L	0.803016	0.0401774	nkx6-1.L	2.55483	0.00689041	bmf.L	2.54358	0.00155394
						ddx51.L	0.80227	0.0179868	pla2r1.L	2.55425	0.0191811	Xelaev18040055m	2.53906	0.0232993
						fam109b.L	0.794998	0.00807515	hist1h2aj.L	2.55002	2.58e-06	prdm9.L	2.53755	0.00218631
						acap2.L	0.793533	0.0235619	spry1.S	2.5492	1.7e-05	col4a2.L	2.53459	0.0435525
						socs6.L	0.791459	0.0483954	myo1d	2.54859	0.00227721	zcchc11.S	2.53114	0.0426679
						sox3.S	0.790041	0.0257552	dkk3.L	2.54783	0.014195	tgif2.S	2.53012	2.81e-13
						Xelaev18003796m	0.787367	0.011895	parp6.L	2.54423	0.00059189	ralgds.L	2.52897	0.00050796
						ccdc18.L	0.786999	0.0437509	sfrp2.S	2.54352	8.34e-08	nckap5l.L	2.52716	0.00539768
						arg2.S	0.786387	0.0207114	Xelaev18038459m	2.54187	0.0140048	ppp1r3d	2.5265	0.0105957
						nmrk2.L	0.783608	0.0445982	slc26a5.L	2.54156	0.000516184	rgma.S	2.52378	1.45e-07
						ripk1.L	0.780277	0.0101564	zc3h12b.L	2.53943	0.00151267	mcoln2.L	2.5191	0.00250114
						fgd1.L	0.777773	0.0311395	Xelaev18013325m	2.53704	0.0320997	Xelaev18024603m	2.51758	0.0155562
						ccdc15.S	0.771262	0.0255151	ly9	2.53415	0.0375056	st3gal5.S	2.51277	0.0358081
						meioc	0.762321	0.0424984	znf503	2.52972	7.92e-07	Xelaev18031338m	2.51256	0.0100342
						ubtd2.S	0.751526	0.0371367	Xelaev18030795m	2.52815	0.0360819	xmc.S	2.51233	0.0421856
						racgap1.S	0.746201	0.0179868	fam46a.L	2.52723	1.37e-09	itgb1bp2.L	2.51105	0.00421556
						eif2ak3	0.742475	0.0145145	ackr3.L	2.52582	4.71e-10	pnhd.L	2.5099	0.0242283
						alcam.L	0.739485	0.0118156	tmprss4.L	2.52279	2.65e-07	ryr3.S	2.50891	0.0257391
						kansl1	0.732708	0.0207114	tyr	2.52276	0.0229512	immp1l.L	2.50408	0.0381956
						egln3.S	0.715036	0.047958	gm39120	2.52269	3.24e-06	glis2.L	2.50136	0.0110808
						racgap1.L	0.714863	0.0338929	gpr151.L	2.5225	0.0313183	cited2.L	2.50084	0.000943499
						acta2.L	0.707582	0.0132982	Xelaev18024858m	2.51932	0.0208363	gal3st4-like.2.S	2.49843	0.0155562
						actg1.L	0.698827	0.00854787	LOC108712607	2.51903	0.0235926	loc733556.S	2.49696	0.0454496
						siah1.L	0.695293	0.0199974	f13a1.L	2.51898	0.0400427	LOC108719253	2.49636	0.00998551
						map3k9.S	0.689237	0.0305216	arrdc4.S	2.5153	2.33e-07	hist1h3g.L	2.49624	0.00131944
						rnf220	0.685632	0.0211942	nuak2.L	2.51498	8.65e-06	has2.L	2.49437	0.00518104
						hic2.S	0.669031	0.0431123	pcdh11x	2.51322	8.23e-05	LOC108719558	2.49222	0.00305886
						ripk4.S	0.660856	0.0187632	mfap2.L	2.51166	0.00763866	pou3f4.S	2.49162	0.0435525
						rabgap1l.L	0.655183	0.00532462	plxnd1.L	2.50896	0.0309009	akap5	2.48776	0.0344996
						znf182	0.654739	0.0336053	cd3e.L	2.50879	3.45e-05	ddit3.L	2.48698	0.0233389
						usp53.L	0.650313	0.0478859	slc4a2.S	2.50597	0.000541705	spata13.S	2.48649	0.00837713
						rest.L	0.639643	0.0351296	LOC108712518	2.50474	5.77e-05	nav3.S	2.48613	0.0132012
						actb.L	0.638155	0.0124578	cacng4.S	2.49955	0.0176975	socs2.L	2.4828	0.025699
						ccdc174.S	0.635718	0.0346899	itga4.S	2.49795	0.000925973	lix1l.S	2.47782	0.00444591
						ercc8.S	0.626274	0.0424658	Xelaev18026561m	2.49777	0.0357923	tdgf1.3.L	2.47509	5.48e-05
						cct6a.L	0.620541	0.0427228	aifm3-like.L	2.49727	7.4e-06	olfm4.L	2.47377	0.00105025
						btbd10.S	0.620091	0.0498831	slc20a1.S	2.4967	1.07e-10	n4bp3.L	2.4705	0.00225198
						kiaa0232.L	0.604803	0.0233672	foxc2.L	2.49645	0.00224037	asap2	2.47038	0.00793545
						scp2	0.583957	0.0485343	znf578	2.49136	0.000393729	gpr65.S	2.46671	0.00288068
						epn2.L	-0.552906	0.0405335	Xelaev18000217m	2.4903	1.45e-07	mpp6.L	2.46657	0.0223344
						mbtps1.L	-0.554583	0.0257552	ugcg.L	2.48214	2.39e-05	il17b	2.46647	0.000592958
						zc3h18.S	-0.556552	0.0427228	LOC101734090.L	2.47917	0.0112023	nedd4l.L	2.46572	0.0100242
						flot1.S	-0.560716	0.0475707	gbp6	2.47498	0.0122598	dst.L	2.46561	0.0024579
						slc4a1ap.L	-0.562138	0.0461215	kdr.L	2.47465	0.00817872	irx2.L	2.4642	2.6e-06
						sept7.L	-0.564605	0.0359167	manba.L	2.47077	1.68e-05	tgif2.L	2.46326	1.31e-11
						utp20.L	-0.577641	0.0464553	slc43a2.S	2.4705	1.07e-06	dlc1.S	2.46322	0.0129325
						dr1.S	-0.591644	0.0406395	tsc22d3.S	2.46687	0.000668273	LOC108708225	2.45901	0.0441845
						donson.L	-0.596021	0.016341	LOC108719558	2.4655	4.26e-17	lefty.L	2.45745	0.0153356
						kpna3.S	-0.598124	0.0497619	LOC100496797.L	2.4653	3.75e-07	cfh.L	2.45634	0.000613373
						pcf11.S	-0.605575	0.0422184	tnip2.S	2.46415	2.53e-07	lurap1.L	2.45633	0.00354904
						cpsf6.L	-0.60619	0.0153323	arv1.S	2.46262	0.0212234	n4bp3.S	2.45535	0.00716672
						ddx17.L	-0.607627	0.0283196	Xelaev18029244m	2.46252	0.000993599	raig3	2.45075	0.0192998
						tars.L	-0.614125	0.0261542	plk3.L	2.4574	5.43e-05	plk2.L	2.44768	0.00279798
						nnt.L	-0.614766	0.0113552	cish.L	2.45727	0.0289157	LOC108701363	2.44717	0.0031005
						syncrip.L	-0.61567	0.0283329	dnah1.L	2.45685	0.00589948	zc4h2.L	2.4466	0.000134128
						pum2.S	-0.61683	0.0484135	a2m.S	2.45511	1.96e-07	lrrc8b.L	2.44281	0.0316946
						prpf6.L	-0.61692	0.0374816	nab1.S	2.45452	9.06e-07	LOC108700142	2.44063	0.0297086
						coro1c.L	-0.617777	0.0299003	kiaa1614.L	2.45367	2.7e-08	rab20.S	2.43635	0.00500703
						smad4.2.S	-0.620934	0.0467977	btg5.L	2.45323	0.00146896	gabarapl1-b	2.43597	0.0455293
						gnb1.L	-0.623368	0.0209438	gpr65.L	2.45197	5.17e-06	tpbg.S	2.42421	4.42e-05
						ehmt1.L	-0.625772	0.0187131	crb2.L	2.44855	0.00207819	plekhg4.L	2.42062	0.00938002
						ap3d1.S	-0.626043	0.0237369	Xelaev18023726m	2.44603	1.38e-07	foxp4.S	2.42055	0.0163259
						cdc25c.L	-0.631245	0.0299766	runx1t1	2.44502	0.00671658	col4a1.L	2.41811	0.0020561
						slc16a7	-0.631878	0.0342834	gjb2.L	2.44361	0.000143717	dock9	2.418	0.0024074
						top1.1.L	-0.632208	0.0431515	mllt6.S	2.44178	2.18e-05	sall3.L	2.41657	0.0200239
						pou5f3.2.L	-0.633787	0.0338929	pnpla8.L	2.44127	7.57e-06	cep85l	2.41624	0.00323449
						map4k5	-0.637332	0.0498189	LOC108710833	2.4407	0.0371392	rev1.S	2.41413	0.00300349
						eif3j	-0.640498	0.0470601	otx1.L	2.43924	0.00165685	ppp1r3e	2.41385	0.00252572
						ppig.S	-0.641787	0.0375407	LOC108704293	2.43643	0.00932522	abcd2.L	2.41229	0.0368348
						smarcc1.S	-0.643549	0.00991978	tmcc1.S	2.43623	1.04e-09	ptpru.S	2.40494	0.0149383
						gys1.S	-0.644044	0.0273979	loc733728.L	2.4361	0.0490322	dhdds.S	2.40481	0.00219856
						bud13.L	-0.648111	0.0351944	LOC108696874	2.43406	9.77e-10	sacs.L	2.40005	1.09e-05
						supt3h.L	-0.648475	0.0416515	LOC108695782	2.43387	0.0365509	aqp3.L	2.39703	0.0451835
						pttg1ip.1.L	-0.651874	0.0472903	Xelaev18034248m	2.43379	0.021937	cyp2j2.L	2.39443	0.00687166
						LOC108695506	-0.651929	0.0408893	kiaa0355.S	2.43319	0.000242817	mgc145260.L	2.39137	2.77e-07
						zfp36l2.S	-0.652162	0.0271132	tmem169.S	2.42972	0.000287201	sh2d3c.L	2.39006	4.06e-06
						nxn.S	-0.654966	0.027524	pde2a.S	2.42805	0.0175913	slc27a3.L	2.38985	0.0109731
						clint1.S	-0.657451	0.00896081	dck.2.L	2.42454	6.34e-12	hdac7.S	2.38797	0.0438174
						psme3.L	-0.660197	0.00702739	Xelaev18016330m	2.42446	0.0145593	kif5c.S	2.38535	0.0171724
						cdc27.L	-0.663333	0.0195822	hes1.S	2.42189	1.1e-06	slc23a2	2.38115	0.0304352
						mon2.S	-0.673166	0.0299003	umod	2.4188	3.74e-06	arg2.L	2.37905	0.0158743
						kiaa1147.L	-0.673201	0.0381168	c8orf4.S	2.41705	0.0037044	rgs9	2.37679	0.0293942
						cnot3.L	-0.674117	0.0296921	LOC108707121	2.41171	0.0479823	cyp1a1.S	2.37523	0.0461918
						ccnyl1.L	-0.67538	0.0314458	larp7	2.40909	0.0451302	col12a1.S	2.37511	0.0220414
						eif3g.S	-0.682414	0.0265558	fzd1.L	2.40636	1.26e-05	met.L	2.3729	0.0368453
						cyfip1.L	-0.685603	0.0108309	c2cd4c	2.40399	0.0367227	traf3ip3.S	2.3729	0.0282973
						plxna1.S	-0.687078	0.0147111	LOC108716166	2.40174	0.0446362	LOC108718425	2.36999	0.0203692
						lsm12.L	-0.690925	0.00448334	dusp4.S	2.39856	1.61e-05	cluh	2.36636	0.0178624
						cltc.S	-0.691314	0.00777015	nrap.L	2.39733	0.000218579	dusp9.S	2.36576	0.0105067
						cacul1.L	-0.699816	0.0488958	Xelaev18001956m	2.39359	0.0100909	tgif1.S	2.36263	0.00575134
						atp2b4	-0.700264	0.00736575	Xelaev18040848m	2.39303	5.14e-06	tc2n.L	2.35961	0.0297721
						mtdh.S	-0.702495	0.00818668	LOC108704294	2.39149	9.25e-05	st3gal1.S	2.35945	0.00130282
						ubc.L	-0.703085	0.0237557	LOC108701786	2.38894	0.0245135	rel.L	2.35783	0.0105669
						itm2a.L	-0.704346	0.0194619	dhh.S	2.38881	7.88e-05	Xelaev18003796m	2.35457	0.00390607
						csnk2a1.L	-0.704908	0.0208246	nhs	2.38765	0.0111382	plxna4	2.34566	0.0221085
						hnrnpa0.S	-0.704921	0.0498104	ing1.S	2.38741	0.00194027	crebrf.L	2.34449	0.00391191
						ythdf1.S	-0.7065	0.0307441	cmya5.L	2.38729	0.00726112	vash1.L	2.33816	0.0109349
						nhp2.S	-0.707949	0.00831237	samhd1	2.38685	3.08e-05	shroom3	2.33736	0.00136522
						gak.S	-0.708351	0.00200183	tex47	2.38666	0.00543978	gcnt1.L	2.33735	0.0336489
						fam83h.L	-0.709365	0.0354112	LOC108704568	2.38449	5.69e-06	exoc3l2.L	2.33467	0.016953
						nup93.L	-0.710991	0.0433447	fam13a.L	2.38248	2.69e-15	bcl9l.S	2.32831	0.0408247
						slx4ip.S	-0.711095	0.00931557	cyld.L	2.38206	0.000215568	prr12.L	2.32734	0.0496343
						ddx5.L	-0.714174	0.0382062	olig2.L	2.38177	0.000777164	LOC108712518	2.32663	0.0469636
						bub3.S	-0.714708	0.0371367	pacs2	2.38042	0.000460728	ggt7.L	2.32498	0.0297934
						lrpprc.L	-0.71746	0.0194744	slc9a5.L	2.37997	0.0445145	prrt4	2.32139	8.42e-06
						phkb.S	-0.721832	0.0050709	casp10.L	2.37918	0.000100581	lpar1.S	2.31684	0.0178624
						lsm2.S	-0.725098	0.00629569	ptprb.L	2.37856	0.00156016	gyg2.L	2.31638	0.0252271
						ddx3x.S	-0.728278	0.0286506	ppp1r3c.1.L	2.37377	2.22e-05	efs.S	2.31592	0.00216706
						gjc1.L	-0.729901	0.00650078	flnc.L	2.37207	0.00837659	LOC105945479.S	2.31544	0.00181045
						eef2.1.S	-0.730687	0.0100684	rasa4.L	2.37044	0.0166019	LOC108701404	2.3142	0.00169282
						jagn1.L	-0.733115	0.0396599	ttc9.S	2.3696	1.75e-07	apela.S	2.31318	0.0281087
						ppp1r8.S	-0.734249	0.0163047	Xetrov90020553m.S	2.36709	3.66e-05	hal.2.L	2.31161	0.0146675
						prpf8.S	-0.734897	0.011537	LOC108718863	2.36218	0.0161846	rapgefl1.S	2.30948	0.000937573
						plxna1.L	-0.736177	0.00565637	farsb.S	2.36201	0.0236248	c4bpa.L	2.30361	0.0262916
						krt8.L	-0.73734	0.0139359	LOC108698423	2.36157	0.0132164	sox11.L	2.30026	0.00164025
						yy1.L	-0.74121	0.0155902	raig3	2.35856	1.18e-05	irf6.2.L	2.29808	0.0437441
						kbtbd7.L	-0.743046	0.0447514	trim25.L	2.35682	1.42e-08	LOC108709819	2.29658	0.0144789
						srsf6.L	-0.744122	0.0482497	galr1	2.35559	0.0120087	tmem222.L	2.29537	0.00194019
						c18orf25.S	-0.74498	0.0220221	sirpb1	2.3528	0.000377912	LOC108703763	2.29237	0.0120543
						edf1.L	-0.745691	0.0186758	acap1.S	2.35113	0.0273814	abhd17b.S	2.29103	1.74e-05
						ctnnb1.L	-0.746223	0.0130058	tubb2b.S	2.35107	0.0131625	flt4	2.28715	0.0482085
						psmd3.L	-0.748056	0.0492014	LOC108705105	2.3507	7.33e-05	lpin1.L	2.28435	0.0063428
						klf8.L	-0.748197	0.027524	p2rx1.L	2.34877	0.0412758	Xelaev18037263m	2.28403	0.0242283
						cyb5b.L	-0.749272	0.0199428	trarg1.L	2.3471	0.00141344	LOC108700223	2.28367	0.00935818
						taf3	-0.750556	0.0229352	armc2.L	2.34685	0.000157793	zbp1.L	2.28223	0.0308746
						polr1b.L	-0.752476	0.00878294	pomgnt2.L	2.34558	1.75e-09	fam13a.L	2.28141	0.00313841
						urb1.L	-0.754739	0.0194328	LOC108711024	2.34147	0.01421	arg2.S	2.28052	0.000457985
						fscn1.S	-0.755217	0.0133461	mms19	2.34057	0.000820885	evc2.L	2.28045	0.0115684
						cgn.L	-0.757262	0.0225101	arhgap4.L	2.34056	0.0392036	gpc4.L	2.2787	4.02e-06
						ube2g1.S	-0.759456	0.0223135	LOC108702643	2.3392	0.0214777	prtg.L	2.27755	0.00499278
						arfgap3.S	-0.762158	0.0283431	gdpd3.S	2.33763	0.0448815	fzd2	2.27638	0.00293805
						rmnd5a.L	-0.764774	0.0469285	tgif1.S	2.3375	5.77e-05	fbn3.L	2.27309	0.014861
						LOC108701277	-0.766138	0.0289762	sp5l.S	2.33679	0.000926852	drosha.S	2.27305	0.00142708
						tob1.S	-0.766492	0.0334282	fras1.L	2.33458	9.41e-05	mamld1.S	2.27071	0.0182743
						LOC779604.L	-0.767381	0.0396599	brinp1.L	2.33294	0.0254482	f2r.S	2.26534	0.0139912
						yap1.S	-0.771315	0.047111	LOC108713490	2.32825	0.0252505	LOC108704327	2.25924	0.00152851
						pum1.L	-0.775829	0.00436966	dhx58.L	2.32654	0.00929459	rnf220	2.25711	0.000144337
						nasp.S	-0.777269	0.0292877	ier3.L	2.32565	0.018005	mab21l2.S	2.25624	0.0172013
						naa30.L	-0.778118	0.0159399	arhgef26.L	2.32562	0.0032254	sh3d19.L	2.25581	0.00254526
						plekhj1.L	-0.778235	0.0118122	unkl.L	2.32557	2.32e-11	rbbp8.S	2.25325	0.0377284
						gna14.S	-0.779406	0.0143574	Xelaev18003821m	2.32475	0.0120935	snx25.L	2.25255	0.0191703
						rfxap.L	-0.782214	0.0432196	znf883l.L	2.32468	0.00101846	cyp26a1.S	2.2517	0.0042065
						bnip3l.L	-0.782717	0.0416752	sox21.S	2.32296	1.04e-05	naip	2.25041	0.0484528
						tnpo2.S	-0.783019	0.0290433	hacd1.S	2.3206	5.67e-07	il1r1.S	2.25029	0.0225141
						ywhaz.S	-0.78323	0.00388455	pdp1.L	2.31854	1.47e-06	LOC108709626	2.24494	0.00030422
						mycbp2.L	-0.785745	0.0020302	Xelaev18037979m	2.31802	0.0193968	dck.1.L	2.24445	8.68e-05
						pik3c2a.L	-0.791114	0.0183666	kcnk16.L	2.31633	0.0289577	plekhn1.S	2.24281	0.00353051
						gm4070	-0.794503	0.0328154	kcnj11	2.3137	0.0022979	Xelaev18008189m	2.24093	0.00775793
						hnrnpa0.L	-0.794577	0.00638375	hhex.S	2.31091	0.00910521	LOC108719883	2.24004	0.00131475
						znf319.S	-0.794656	0.0189764	tubb3	2.31026	0.0242448	ceacam21	2.23953	0.00505491
						tsc22d1.L	-0.799587	0.0188705	f2rl1.S	2.30845	3.45e-08	sh3d19.S	2.23902	0.000498435
						loc728026.L	-0.800212	0.0437509	MGC115585	2.30452	4.01e-10	vim.S	2.23334	0.00229959
						adipor2.S	-0.801221	0.0237557	LOC108715641	2.30445	0.00713405	LOC108695555	2.22796	0.0451428
						uap1.L	-0.801985	0.018897	psat1.L	2.30438	6.73e-14	cdh2.L	2.22696	0.00250615
						dcp1b.S	-0.802733	0.0353533	cluh	2.29966	0.00189782	LOC108695571	2.22678	0.00193735
						xkr7.L	-0.803439	0.00317391	Xelaev18006443m	2.29816	0.0265299	hist2h2ab.L	2.22485	0.0238573
						med25.S	-0.805137	0.0269733	ptprh.S	2.29635	0.00689536	usp43.L	2.22278	7.37e-06
						phldb3.S	-0.805324	0.0218722	Xelaev18037263m	2.29573	0.00517298	kiaa2026.S	2.22073	0.0442721
						dusp11.2.S	-0.805902	0.0393089	crim1.L	2.29072	0.0462467	ubl4a.L	2.21852	0.0367121
						asxl1.L	-0.806281	0.0424984	fam131b.S	2.28934	0.0379976	dact3.L	2.21733	0.040927
						cdc27.S	-0.806313	0.00868237	epha4.L	2.28821	3.43e-11	LOC108704851	2.21667	0.016489
						ptbp1.L	-0.807608	0.000755173	pak7.L	2.28689	0.0232352	cyp51a1.L	2.21362	0.0251451
						idh2.S	-0.808832	0.0130344	lrrtm3.L	2.28616	0.0256658	arhgap29.L	2.2119	0.000494371
						src.S	-0.809034	0.036844	insm2.L	2.28315	0.00200931	helz2	2.21113	0.0168988
						gpd1l.L	-0.810868	0.00711794	Xelaev18036449m	2.28126	0.00661802	tmprss9	2.20745	0.00599195
						bcl7a.L	-0.812513	0.00467391	hlx	2.27937	4.53e-07	slc43a2.L	2.20712	0.010661
						adam10.S	-0.816761	0.00263781	nedd4.S	2.27772	0.0366927	LOC108709327	2.20657	0.0282818
						proser1.L	-0.818775	0.0104646	Xelaev18028404m	2.27531	0.0181249	nck2.S	2.20571	0.00401855
						ddx19b.L	-0.823436	0.0306481	Xelaev18006312m	2.27367	0.0494162	il17rd.S	2.20564	0.0045189
						hyal2.S	-0.825541	0.0190259	pitpnm2.L	2.273	0.00095699	tgif1.L	2.20319	0.00121051
						znf217.L	-0.825839	0.0265336	LOC108719572	2.26683	0.0458135	fndc3a.S	2.20008	0.000434779
						unnamed.S	-0.830362	0.0389911	cars2.L	2.26432	0.000413762	stk40.L	2.1983	1.56e-08
						frmd8.L	-0.830451	0.00595588	nrdc.L	2.25794	2.97e-05	znf608.S	2.19574	1.45e-06
						bcor.L	-0.836565	0.0352807	MGC115316	2.25742	0.0142712	unc45b.L	2.19366	0.0228578
						yy1.S	-0.83855	0.005022	slc25a37.S	2.25464	0.0352502	hpgd.S	2.19227	3.16e-05
						neo1.S	-0.83892	0.0497479	il6st.S	2.25437	2.39e-08	atg4c.L	2.19186	1.17e-05
						slc35b2.L	-0.84213	0.00452505	zfhx3.S	2.25344	2.26e-10	LOC108714379	2.18984	0.00673637
						strap	-0.844435	0.020561	heg1.S	2.25141	0.000444272	ckap2l	2.18948	0.000585924
						efna4.L	-0.847478	0.0139029	neurl1b.L	2.25074	7.22e-18	prcp.L	2.18642	0.0487695
						sh3pxd2b.L	-0.848151	0.0451409	LOC108710897	2.24896	0.000363249	loc100145274.L	2.18559	0.00607267
						mta1	-0.84817	0.0419318	ptch1.L	2.2453	1.8e-09	arl5c.L	2.18172	3.62e-08
						znf750.S	-0.849489	0.0373063	casr	2.24294	0.000117407	cttnbp2nl.L	2.17589	0.00316071
						post10.L	-0.850185	0.0451409	spred1.L	2.24222	9.63e-07	tmem39b.L	2.17566	0.0329697
						smim15.S	-0.850666	0.0332687	tapbpl-like.L	2.24082	0.00119895	gcnt3.S	2.17541	0.0268269
						kpna3.L	-0.851839	0.00506751	Xelaev18012750m	2.23971	0.00126538	gas1.L	2.17458	0.0032875
						ryk.S	-0.85483	0.031828	Xelaev18009143m	2.2394	0.0392189	sp5l.L	2.17085	0.0213005
						tomm22	-0.855889	0.0279011	LOC108704218	2.2394	0.00149147	gpx2.S	2.17038	0.0152354
						atxn7l3.S	-0.85589	0.0161727	dhdds.S	2.23907	1.85e-12	sema4a.L	2.16959	0.00329259
						nck1.S	-0.859648	0.0210578	b4galnt4.L	2.23242	0.0215965	LOC100036994	2.16925	0.0253815
						larp1.L	-0.861392	0.0126864	rflb.L	2.2308	0.000830381	itprip.S	2.16627	0.00694423
						slc25a13.S	-0.861427	0.0070657	Xelaev18039004m	2.23056	0.0411647	loc100144919.L	2.16574	0.0033237
						pcnx1	-0.86477	0.0159568	vmp1.L	2.22931	1.3e-11	suox.S	2.16503	0.000952895
						rhebl1.L	-0.866233	0.0394108	plekhg5.L	2.22566	0.0341657	lamp1.L	2.15887	0.000411647
						wdr82.L	-0.866278	0.000789689	frmd4a.L	2.22383	3.1e-08	gmnn.S	2.15702	7.34e-11
						zmynd8.S	-0.86652	0.0299003	abcc8	2.22219	0.000438137	frrs1l	2.15229	0.00222041
						rab5b.L	-0.870044	0.0155856	dchs1.L	2.22085	5.89e-07	tnfrsf1a.L	2.15078	0.031459
						pum1.S	-0.871031	0.00572321	znf710.L	2.21838	2.15e-09	tmem55a.S	2.14952	0.0129416
						igsf3.S	-0.872151	0.00475707	LOC108717895	2.21775	5.15e-06	LOC108695538	2.14521	7.65e-05
						pard3b	-0.872569	0.0208246	psat1.S	2.21674	8.63e-07	ninj1.L	2.14233	0.0336739
						tcf7l1.S	-0.874573	0.0460663	nat8l.L	2.21521	0.00430438	ampd3.L	2.14108	0.0467874
						faim.L	-0.876337	0.0227371	pfkfb3.L	2.21286	1.2e-12	tmlhe.L	2.13822	0.0195307
						pbx1.L	-0.877538	0.00291742	simc1.L	2.21206	0.00428645	fech.S	2.13814	0.0471292
						trim7.S	-0.883008	0.0193707	myo7a.L	2.20626	0.00780441	tcim.L	2.13717	0.0330233
						enah.S	-0.896904	0.0021668	enpp2.L	2.20579	0.0196552	aplp2.L	2.13579	6.42e-06
						sptan1.L	-0.899236	0.000224893	plekhg3	2.20521	6.8e-05	LOC108703744	2.13373	0.00482925
						plscr1.L	-0.905015	0.0299003	Xelaev18028821m	2.20128	0.0060604	tbx15.L	2.13221	0.0255125
						rab11fip4l.L	-0.905911	0.0412512	avpr1a.S	2.20105	9.46e-05	pkdcc.1.S	2.13032	0.0357421
						sec61a1.S	-0.906716	0.0351008	ccdc3.L	2.20057	0.00207106	LOC108699848	2.12948	0.0154144
						rpl29.S	-0.907096	0.0368585	fbxo46.S	2.19999	0.000245721	LOC108716428	2.12614	0.0150122
						fsbp-like.L	-0.907658	0.0357856	kbtbd11.L	2.19645	0.0106191	dnmbp.L	2.12477	1.83e-05
						tmbim1.L	-0.908008	0.0337048	lama3.L	2.18876	0.0217349	LOC108719510	2.124	1.86e-05
						hif1an.L	-0.908497	0.00968987	sh2d3c.L	2.18435	1.1e-07	fzd1	2.12329	0.0471817
						ier5l.L	-0.911146	0.0266596	LOC108709110	2.18432	0.00644211	rab26	2.12181	0.029168
						unc119b.L	-0.912396	0.0089483	dock8.L	2.18228	0.0170975	tmprss13.S	2.12073	0.0266491
						rapgef1.S	-0.914343	0.00629311	ptch2.S	2.18143	0.00092023	unc45b.S	2.1184	0.0199521
						litaf.L	-0.914954	0.0136864	marchf2	2.17938	0.0467441	hdac7.L	2.11782	0.00487794
						agl.L	-0.916814	0.000693082	lif.S	2.17511	0.0343503	rbm20.L	2.11716	0.0316946
						rpl39.S	-0.917355	0.0154812	kiaa0141.L	2.17369	0.0113143	LOC108713828	2.11417	0.00840171
						cluh.L	-0.917837	0.0273201	zfp36	2.17286	0.0183071	mdfic.S	2.11387	0.00356592
						zbtb10.L	-0.918552	0.0444141	mfn2.L	2.17285	0.000107301	ncmap.S	2.11341	0.00301001
						drc1.L	-0.923826	0.0162556	spry1.L	2.16928	0.00117125	ugcg.L	2.11182	0.00938579
						ubald2-b	-0.925023	0.0395955	dclk2	2.16915	0.00129021	grk5.L	2.11076	0.037725
						Xelaev18026710m	-0.925991	0.0160599	ccna1.S	2.16712	0.00473605	c9.L	2.10874	0.00107451
						tia1.L	-0.929134	0.0113677	dzip1l.S	2.16135	0.0428552	fam89a.S	2.10746	0.033321
						bmp7.2.L	-0.929501	0.0127493	trpm8b.L	2.16105	0.00146377	rab40b.L	2.10649	0.00737231
						sptan1.S	-0.929995	0.000930386	rorb.2.S	2.15635	0.0247867	fam109a.L	2.10477	0.0257391
						tfdp2.S	-0.932603	0.00313746	asah1.L	2.15448	0.000240857	smo	2.10175	0.0274124
						prkaca.S	-0.936082	0.00693338	LOC108716747	2.15323	0.0100483	mttp	2.10103	0.000921977
						ppp2r2a.S	-0.93616	0.00458044	LOC108712667	2.14759	9.25e-05	dck.2.L	2.10071	3.24e-06
						map2k3	-0.937886	0.0495317	fam241a.L	2.14411	0.0236597	hyal2.S	2.10067	0.0034542
						pbx2.S	-0.939774	0.00130732	prkcd	2.14243	3.47e-06	sat1.S	2.09853	0.000577382
						ehd3.L	-0.940939	0.00776236	Xelaev18032100m	2.14197	0.00075148	vav2.L	2.09427	0.00388748
						smad1.L	-0.940958	0.0426114	LOC108704201	2.14107	1.63e-09	lhx5.L	2.09358	0.000615005
						rnf139.L	-0.943173	0.0351568	LOC108703819	2.14072	9.38e-07	icam5	2.0923	0.000132322
						fgfr2.L	-0.94335	0.00797808	LOC108697184	2.14056	0.0144736	tulp4.S	2.0922	0.023931
						sumo2.S	-0.945936	0.000348696	clmn.S	2.1357	5.77e-05	klf9.L	2.09192	0.00165388
						hcfc1.S	-0.947162	0.00295283	otx1.S	2.13192	0.0157513	coq10b.L	2.08915	0.00268119
						hnrnpr.S	-0.949429	0.0044927	scn2a	2.13101	0.00478817	dusp7.L	2.08867	0.0342334
						cs.L	-0.954241	0.000644401	tmem169.L	2.13052	0.000200302	cntln.L	2.08802	0.0324517
						tra2a.L	-0.955001	0.0021668	cldn6.1.S	2.13045	1.76e-13	lipe.S	2.08781	0.0169802
						trappc9.L	-0.955883	0.0475183	LOC108716723	2.1298	0.00571933	fbn1.S	2.08741	0.0304791
						mrps2.L	-0.956574	0.0288647	rcan3.L	2.12939	0.0258334	ggact.L	2.0858	0.0347717
						srp68.L	-0.957116	0.000246656	LOC108696608	2.12843	0.0182878	fzd7.S	2.08168	7.69e-06
						lpcat4.S	-0.957443	0.0478859	sds.L	2.12828	2.81e-05	rgma.L	2.07783	0.0358446
						ppp1r3c.2.L	-0.960684	0.03045	tbx1.L	2.1245	0.0272363	slc24a5.L	2.07487	0.0134203
						hnrnpul1.S	-0.961588	2.5179e-05	gmnn.S	2.12283	2.46e-15	Xelaev18022009m	2.07433	0.00450891
						hdgf.S	-0.962374	0.00387741	arhgap25.S	2.12146	0.0422994	grtp1.S	2.07143	0.0274627
						znf750.L	-0.96326	0.016341	Xelaev18013319m	2.12118	0.0405189	LOC108709818	2.0677	0.00962397
						efna1.S	-0.964296	0.00216601	nr4a1	2.12013	7.35e-05	acsl6.L	2.0656	0.000855383
						sspo.L	-0.964316	0.00496353	pcsk5	2.11953	1.68e-06	alcam.S	2.06495	6.96e-05
						erbb2.S	-0.965723	0.00496213	epha7.L	2.11749	0.008127	rnf32	2.06363	0.0270844
						LOC108711583	-0.967358	0.0215197	ptprt	2.11741	0.0315336	dmac2.L	2.06197	0.0431681
						aph1a.S	-0.968305	0.0171003	LOC108699860	2.11738	0.0402228	mgat4b.L	2.06185	0.01488
						trim71.S	-0.968699	0.0233895	LOC108719510	2.11698	1.38e-09	Xelaev18038799m	2.05975	0.0143895
						sox15.L	-0.971971	0.00420508	fzd4.L	2.11648	5.69e-06	LOC108714350	2.05745	0.0180624
						zhx2	-0.9744	0.0208246	sat1.S	2.114	4.62e-06	mov10l1.L	2.05501	0.0108015
						enc1.L	-0.979147	0.0346014	LOC108709327	2.11238	0.00075148	dcbld1.S	2.05403	0.00303018
						rtf1.L	-0.983448	0.00950035	Xelaev18020493m	2.11164	0.0159367	sgip1.L	2.05169	0.0133432
						rpl19	-0.984926	0.0329459	Xelaev18033596m	2.1112	0.0212132	spire2.S	2.05074	0.020393
						lsp1.S	-0.985197	0.0489883	Xelaev18042923m	2.11005	0.0264205	LOC108698044	2.05066	0.0332615
						capn1.L	-0.985392	0.0111445	myom1.L	2.10942	0.0176975	ciart	2.04888	0.00037714
						tbc1d24.1.L	-0.985545	0.0021871	clip2.L	2.10892	0.0277445	myh7	2.04874	0.0376289
						esyt1.L	-0.989508	0.00953242	aplp1.L	2.10633	0.0113447	MGC115510	2.04209	0.0368453
						rbm14.L	-0.989863	0.00906977	LOC108695501	2.10463	0.00631728	adgrg1.S	2.04021	0.0219454
						cfap52.L	-0.989979	0.0316067	LOC108704220	2.10334	0.00355527	vrk1.L	2.03995	0.0120487
						unc13b	-0.990272	0.0322239	LOC108703467	2.10267	0.0178323	znf608	2.0383	5.06e-06
						Xelaev18011097m	-0.990304	0.0172752	scgn.S	2.1023	0.0490979	cldn6.1.L	2.03298	0.000554965
						MGC81785	-0.990984	0.0227904	serpinb4.L	2.10021	0.0211734	fgd6.L	2.02942	7.6e-06
						ctnnbip1.S	-0.991631	0.00449715	stxbp5l.L	2.09643	0.000638058	srebf1.S	2.02841	5.78e-05
						clk2.L	-0.993064	0.0367802	sox1.S	2.09326	0.00645888	scmh1.L	2.02611	0.00439321
						esrp1.S	-0.994658	0.04218	sox8.S	2.09299	0.00616964	trpv2.L	2.02363	0.0331967
						txnrd3.S	-0.995814	0.00133311	abhd14a.S	2.0916	0.000872915	gli3.S	2.02348	0.00959538
						fkbp10.L	-0.998252	0.0167173	nhsl2.L	2.0912	0.0392134	plekhg3.L	2.02332	4.37e-05
						ptprf.S	-1.00234	5.67894e-05	LOC108703382	2.09082	0.0319773	fcho1.S	2.02132	0.00562327
						lpar2.L	-1.00349	0.0473712	znf703.L	2.08958	7.29e-07	lfng.S	2.02055	0.00230317
						vwa5a.L	-1.00395	0.0179868	znf367.L	2.08918	0.00549134	mmp14.L	2.0199	0.0120831
						MGC52827	-1.00433	0.0337048	sox3.S	2.088	2.18e-07	c3.L	2.01849	0.00341084
						pygl.L	-1.00557	0.0367802	spon2.S	2.08719	0.0412887	vps26c	2.01831	0.0437441
						plcd1.S	-1.01422	3.05775e-05	slc12a9.L	2.0841	0.0279214	ncoa2.S	2.01814	0.00352014
						far1.L	-1.01467	0.027883	ulk2.L	2.0827	0.00296008	slco5a1.L	2.01764	0.0282931
						clpx.L	-1.01509	0.00201122	LOC108709430	2.07807	0.00241896	uhrf2.L	2.01605	0.014486
						trim25	-1.0176	0.00194932	ptprb	2.07636	0.00469489	pard6g.S	2.01594	0.00167055
						tspan13.L	-1.01773	0.0189764	slc6a13	2.07598	0.0404446	rflcii.L	2.0138	0.00182151
						ext2.L	-1.01842	0.000334772	kiaa2026.S	2.07549	0.0107233	hist1h4d.L	2.0136	0.00253189
						a430005l14rik	-1.01973	0.00118426	c2.L	2.0748	0.0332665	rgmb.S	2.00847	0.000441317
						ykt6.L	-1.02183	0.0144763	herc6.L	2.0739	0.021153	susd1.S	2.00823	0.0296805
						ldb1.S	-1.02511	0.0103846	gcnt1.L	2.07234	0.000207763	ddhd1.L	2.00653	0.00161287
						atp8b1.S	-1.02633	0.00906977	ccdc102a.L	2.07193	0.00828096	pvrl3.L	2.00392	0.000515897
						rpl37.L	-1.02897	0.0301382	Xelaev18032628m	2.07105	0.00121362	LOC108711733	2.00155	0.00110668
						pde3b	-1.0293	0.00727697	LOC108697295	2.07065	0.00604731	pgm1.S	2.00012	0.000954457
						prickle2.L	-1.03403	0.014135	MGC68910	2.06684	0.000115123	iqsec3.S	1.9981	0.00959009
						rpl8.L	-1.035	0.0227904	homer3.L	2.06619	0.0280178	ND5	1.99702	0.00514749
						tmem263.L	-1.03794	0.000671852	igsf3	2.064	0.0453861	rnf125.S	1.99427	0.0153356
						rbm38.L	-1.04547	0.0149953	auts2	2.06252	3.14e-08	samhd1	1.99009	0.01541
						Xelaev18015396m	-1.04559	0.000923104	LOC108699863	2.06212	5.97e-06	tmc4.L	1.98978	0.0494529
						rogdi.S	-1.04769	0.0446538	sh3bp4.L	2.06102	2.22e-09	ccdc102a.S	1.98976	0.027785
						sytl4.S	-1.05319	0.0147762	LOC108704231	2.06049	2.28e-06	abcb9.L	1.98546	0.00160563
						LOC443712	-1.05604	0.00293402	znf608.S	2.06019	4.51e-12	sh2b3.S	1.98173	0.0117912
						srsf2.L	-1.06087	0.0227371	ascl2.L	2.05808	0.00503338	lhfpl2.L	1.98141	0.00155352
						wnt5b.L	-1.06344	0.00428739	ca14.S	2.05599	0.0206257	luzp1.S	1.98077	5.97e-05
						mon1b.S	-1.06709	0.00825878	cyp1a1.L	2.0553	5.94e-08	cplx2.L	1.98026	0.00164611
						gpnmb.L	-1.06845	0.00931557	slc5a2.L	2.05516	0.00469609	cyp2c8.1.L	1.97709	0.00990726
						arid3a.S	-1.07031	0.00238268	LOC108698788	2.05424	0.0140048	cacnb4.S	1.97539	0.0355006
						lrrc75b	-1.07065	0.0177745	slc6a13.L	2.0527	0.00184216	acer2.L	1.97517	0.00423592
						sap30.S	-1.07119	0.00864815	lix1l.S	2.05198	2.39e-08	trim66.S	1.97207	0.0297254
						LOC108696757	-1.07178	0.0104731	meis2.S	2.04553	0.00122185	txnip.L	1.97204	0.0120966
						lrrc1.S	-1.07555	0.00812859	LOC108704327	2.04525	0.000537738	tbkbp1.S	1.97167	0.0203542
						erbb2.L	-1.07747	0.0164291	tmprss9.L	2.04483	0.000272343	rtp3	1.97075	0.0200022
						slc2a2.L	-1.07847	0.0486586	hes1.L	2.0448	2.92e-09	lrrk2.L	1.96071	0.000459871
						anxa4.L	-1.07931	0.000636094	evc2.L	2.04354	0.000478373	gas2l3.L	1.95676	0.025683
						myo9a	-1.07969	0.0325299	LOC100037118	2.04275	0.0248639	smim18.S	1.9564	0.0160354
						mdk.L	-1.08061	0.00115352	sbno2.S	2.04187	1.58e-05	cd276.S	1.95554	0.00162543
						sema4a.S	-1.08443	0.0114853	mhc1b2.L	2.04112	0.0126662	st3gal2.1.S	1.95119	0.00810289
						bcs1l.L	-1.08448	0.0255671	cebpb.L	2.04014	0.00647023	per3.S	1.94694	0.0193575
						dsp.L	-1.08448	0.00772646	tubz1.L	2.03962	1.46e-05	fam198a.L	1.94689	0.000340134
						zc3h10.L	-1.08634	0.0424658	LOC108699553	2.03314	1.15e-05	tmem38b.S	1.94435	0.0487813
						cited4.S	-1.08705	0.00124982	h2afj.L	2.03139	0.000298584	Xelaev18035393m	1.94139	0.0105067
						dsg2.L	-1.08942	0.00980932	Xelaev18012199m	2.03059	0.000576343	prr5l.L	1.9409	0.0449824
						pou5f3.1.L	-1.09029	0.011895	frk.L	2.03026	0.0462543	anks6	1.93279	0.016051
						ccng1.S	-1.09237	0.0177884	Xelaev18038799m	2.02907	2.18e-05	acer2.S	1.92682	0.00791986
						ppp2r2a	-1.09289	7.54033e-05	tmem158.S	2.02906	0.00108695	st6galnac2.L	1.92578	8.82e-08
						ssr2.L	-1.0972	0.0324918	ptpdc1.L	2.02881	0.0153607	tada2a.L	1.92553	0.000109131
						tmem39a.S	-1.10052	0.001119	LOC108716549	2.0274	0.0010694	irs4.S	1.92497	0.00998898
						pdgfb.L	-1.1019	0.0070532	cacna2d4	2.02612	0.0499677	arl8a.S	1.9197	0.0362545
						phldb1.S	-1.10438	0.00111775	spsb3	2.02492	1.64e-09	calml4.L	1.91684	0.0429299
						c12orf45.L	-1.10583	0.0194328	kif1a	2.02284	0.00711147	cass4.L	1.91504	5.51e-05
						kpna4.S	-1.11147	0.00386317	heg1.L	2.02192	0.038057	fcho1.L	1.91495	0.0155243
						dnajb6.S	-1.11229	0.03283	gpx2.S	2.02028	0.000228731	ska2.S	1.91424	0.00725099
						mst1.S	-1.11898	0.00271314	nr1d1	2.0186	5.91e-05	tor1b.S	1.91418	0.0329862
						gga1.L	-1.11921	0.0148668	itgb6.L	2.01848	0.00642864	sp4.L	1.91103	0.0143185
						galnt10.L	-1.11952	0.0329083	birc7.L	2.01756	6.45e-05	wasf3	1.91055	0.00691096
						acvr1.S	-1.1214	0.000376749	loc108699308.L	2.01676	0.0149996	pdk4.L	1.90937	0.00853339
						upk2.S	-1.12242	0.0453847	rmi1.L	2.01669	2.33e-08	pik3r3.L	1.90317	0.000235843
						ano5.L	-1.12287	0.00198296	mptx1	2.01196	0.0186467	Xelaev18032628m	1.90284	0.00995055
						ptgfrn.S	-1.1234	0.000819386	dnajb4.L	2.01161	0.00560059	Xelaev18012199m	1.90204	0.038216
						b4galt2.S	-1.12368	0.00132337	trim37.L	2.00931	7.23e-05	aldh1a2.L	1.90015	0.0150254
						tceb3.L	-1.12528	0.000520924	micall1.L	2.00844	0.000401816	acot1	1.89686	0.0121324
						c1orf52.L	-1.13197	0.00127031	flrt2.S	2.00836	0.000588891	mcm3.L	1.8943	0.0175045
						gadd45a.L	-1.13271	9.24237e-05	LOC108719063	2.00806	5.17e-11	awat1.L	1.89173	0.00306159
						hipk1.L	-1.13602	0.00268544	zfand4.S	2.00785	0.000478852	LOC108719063	1.88966	0.0285695
						vangl2.L	-1.13606	0.00279523	mab21l2.L	2.0078	0.00442958	nr2f1.L	1.88814	0.024859
						mta1.L	-1.13709	0.023158	LOC108700185	2.00723	0.0384358	pptc7.S	1.8875	0.00749096
						smad9.L	-1.13759	0.0274972	tmprss9.S	2.00671	0.0198364	sox2.L	1.883	0.00838305
						ankrd50	-1.1408	0.00137076	cbwd1.1.S	2.00454	0.0135033	slc6a13.L	1.88218	0.0035762
						uck2	-1.14092	0.0058241	fcho1.L	2.004	2.03e-06	LOC108719267	1.88108	0.000299325
						efnb1.L	-1.14137	0.0376912	tlcd2.L	2.00209	6.06e-05	boc.S	1.88051	5.02e-05
						zmiz2.S	-1.1416	0.00836648	cdc25b.S	1.99885	4.01e-10	Xetrov90015964m.S	1.87818	0.0353158
						atp5a1.L	-1.14304	0.0176961	ncoa2.S	1.99638	1.65e-10	kdm2a.S	1.87818	0.0102173
						mycl.L	-1.14746	0.00299858	larp6-like.1.L	1.99384	0.0460552	tmem79.S	1.87446	0.0115887
						LOC108706589	-1.15144	0.00198296	LOC108705674	1.99356	0.00851452	adamts17.L	1.87265	0.00646416
						impa1.L	-1.15433	0.0365686	cmtm3.S	1.99304	0.0158344	gpm6b.S	1.87116	0.0359819
						Xelaev18001443m	-1.15517	0.0194795	fzd7.L	1.99283	5.83e-08	cfb.L	1.87045	0.000470355
						ctf2	-1.15611	0.0182864	vim.S	1.99114	5.06e-06	LOC108719787	1.87009	0.00154024
						galnt7.L	-1.16087	0.0139005	tmem164.L	1.98673	5e-07	meis1.L	1.87005	0.00364056
						pdxdc1.L	-1.16137	0.0139029	LOC108703537	1.98415	0.00273904	lmo7.S	1.86837	0.0192958
						best2.S	-1.16194	0.0120611	cplx2.L	1.98391	0.00361427	LOC108719529	1.86669	0.0012669
						dock1.S	-1.16272	0.00226228	timp3.L	1.98267	0.000169193	LOC108698109	1.86594	0.0173044
						ahnak.L	-1.1634	0.00341894	adcy4.S	1.98174	0.0168157	arhgap36.L	1.86026	0.00155352
						xk	-1.16565	0.000495294	itgb4.S	1.98086	0.00111603	enox1.L	1.85823	0.00605692
						fam174b.L	-1.16903	0.0012744	scai	1.97686	0.0272363	abca2.L	1.85818	0.00319935
						cfap100.L	-1.16984	0.045911	fgd1	1.97551	0.0143479	atg4c.S	1.85471	0.000868131
						ywhaz.L	-1.17098	7.71263e-06	fam83b.S	1.97215	0.00112785	wee1.S	1.85096	0.0168086
						c2cd2.S	-1.17456	0.0182266	LOC108702204	1.96973	0.0198974	LOC100037197	1.85085	0.000169065
						dpp8.L	-1.17819	0.000255161	Xelaev18015866m	1.96832	0.0359851	ptar1.S	1.85072	0.00465321
						Xelaev18017221m	-1.17858	0.0107924	txnip.L	1.96825	1.98e-12	epha2.L	1.849	0.0455867
						LOC108710170	-1.1794	0.0252263	akap12.L	1.96804	1.69e-06	usp54	1.8484	0.0126451
						fam110a.S	-1.18074	0.00132336	rab37.L	1.9672	0.0391569	LOC108698739	1.84778	0.00368989
						ppp3r1.L	-1.18164	0.0259226	fbn2.L	1.9664	0.0346342	slc20a2.L	1.84642	0.0309038
						mrps35	-1.18185	0.00383192	igsf9b.L	1.96638	0.0214679	atp10b	1.84608	0.00620791
						vangl2.S	-1.18525	6.84578e-06	irs4.S	1.96437	1.07e-09	dclk2	1.84383	0.0360248
						fgfr2.S	-1.18547	0.0233672	kif5c.S	1.96407	0.000889834	LOC108699553	1.84242	0.0120966
						epb41l1.S	-1.18673	0.0194694	cracr2b.L	1.96386	0.000700539	wee2.S	1.84151	0.0461855
						tfcp2l1.S	-1.19155	0.0171113	filip1.L	1.96379	0.000818251	irx2.S	1.84129	6.66e-06
						arid3a.L	-1.19228	0.001093	ccdc88a.S	1.96119	0.000284995	adamts1.S	1.84055	0.000652461
						ptbp1.S	-1.19294	0.00134373	Xelaev18035105m	1.95731	0.00198014	zfhx3.S	1.83809	0.00939569
						cecr2.L	-1.19334	0.00360327	cdca7	1.95556	0.0214404	dapk1.S	1.83584	0.00106487
						endou.S	-1.20213	0.0412512	LOC108701523	1.95545	0.00576515	bloc1s6.S	1.83528	0.000252303
						scube2.S	-1.20248	0.000237355	ppp1r3e	1.95506	0.00171493	unkl.S	1.82963	0.00148686
						znf318.L	-1.20408	0.00111603	parp9.S	1.95468	0.000791865	rdh9.L	1.82872	0.0282973
						stx19.S	-1.20469	0.0397919	rgs9	1.95197	0.0446818	dstn.L	1.82815	0.000673972
						trib2.L	-1.20472	0.0215752	metrnl	1.95138	0.0190798	Xelaev18001689m	1.82813	0.0296948
						dolpp1.L	-1.20503	0.0022869	cxcl11.L	1.94949	0.00795858	cttnbp2.L	1.82182	0.000603498
						trim24.L	-1.2064	0.00719912	plekho1.L	1.9493	0.00187654	LOC108711632	1.8217	0.00935818
						prom1.L	-1.20914	0.000451919	ubl4a.L	1.94689	0.00874645	mterf3.S	1.8182	0.00403251
						sgk3.L	-1.20933	0.00710666	hsf2bp.L	1.94639	0.0130641	znf84	1.81665	0.0414426
						ube2e2	-1.21044	0.00777015	crem.L	1.94585	0.00121661	sept6.S	1.81598	7.14e-05
						nedd9.L	-1.21354	0.0435771	dapl1.S	1.94402	0.000247469	sspo.L	1.81285	0.00126838
						slc6a7	-1.21507	0.00968987	LOC108696519	1.9424	0.0417622	ttyh2.S	1.81263	0.0169557
						arvcf.S	-1.21742	0.000611393	dnah14.L	1.94131	0.00609409	kiaa0226l.S	1.81247	0.00938579
						znf512b.S	-1.21872	0.0262234	arrdc2.L	1.9413	0.000586047	cxorf57.L	1.81155	2.73e-06
						post7p.L	-1.22183	0.00169899	evi5l.L	1.93978	0.031696	nin.L	1.80909	0.00597527
						rbms2.S	-1.22384	0.047958	zbed6cl.L	1.9384	0.0016715	tbc1d10a.L	1.8089	0.00160252
						kpna4.L	-1.22438	0.000293433	LOC108716727	1.93603	0.000156257	smim13	1.808	0.0125884
						MGC68706	-1.226	0.00288781	hist1h4d.L	1.93294	2.37e-07	LOC108704254	1.80795	0.0141941
						tmcc3.L	-1.22742	0.00115352	LOC108719529	1.92655	3.7e-06	tmtc4.L	1.80562	0.0136949
						itga3.S	-1.23037	0.000747453	Xelaev18035393m	1.92552	0.0120087	mex3b.S	1.8045	0.0487873
						gclc.L	-1.23078	4.01206e-05	helz2	1.92409	0.000823198	rabgap1l.S	1.8041	0.0384022
						tcf7l1.L	-1.23361	0.00267147	ikzf2.L	1.92397	0.00391218	macf1.S	1.79621	7.02e-06
						LOC108715172	-1.23667	6.46061e-05	LOC108713441	1.92289	0.0010452	ccdc126.S	1.79604	0.0372495
						hic2.L	-1.23861	0.0316875	kiaa1841.L	1.91976	0.0256441	Xelaev18022167m	1.79534	0.0112689
						rassf6.S	-1.23914	0.0464202	LOC108701852	1.9197	9.75e-09	chst12.L	1.79179	0.0252761
						arhgap27.L	-1.24178	0.0464553	LOC108698553	1.91886	0.00217392	mycl.S	1.79038	0.000165586
						srd5a1.S	-1.2422	0.0292629	sema4b.S	1.91784	3.01e-05	nrdc.L	1.7895	0.000844288
						c1galt1.L	-1.24458	0.0404133	lpar6.L	1.91713	1.23e-15	ror1.S	1.78778	0.00703881
						ubtd1.S	-1.24801	5.08673e-05	Xelaev18002446m	1.91521	3.79e-05	cass4.S	1.78364	0.0246459
						foxn3.L	-1.24836	0.000196016	gramd2b.S	1.91432	6.46e-05	jag1.L	1.78239	0.00282541
						LOC108700791	-1.2491	0.037496	LOC108716734	1.91324	0.00454351	tubz1.L	1.78035	0.0219819
						vps33a.S	-1.25057	0.0185217	Xelaev18026939m	1.9132	0.00957089	ccdc50.S	1.77787	0.0034155
						cbfa2t2.L	-1.25062	0.00971813	doc2a.S	1.91167	0.00183176	fez2.S	1.77654	0.00257064
						post.L	-1.25341	0.00117892	pcdhga2	1.90881	0.031078	malt1	1.77647	0.0313962
						lzts2.S	-1.25369	0.0347602	ampd3.L	1.90611	0.00326944	gramd4.L	1.77446	6.68e-07
						entpd2.S	-1.25482	0.0104558	LOC108714507	1.90575	2.65e-07	gla.S	1.77301	0.0480283
						fhl3.L	-1.2557	0.0225101	LOC108717919	1.90275	0.0332277	LOC108698352	1.77276	0.037407
						nuak1	-1.25743	0.0137915	Xelaev18002226m	1.90268	0.00628144	urah.S	1.77256	0.0355097
						plcd3.L	-1.2598	0.0072751	map3k19.L	1.89774	7.79e-06	arhgef3.2.S	1.77184	0.024273
						fnip2.S	-1.26007	0.00558572	spata13.S	1.89591	1.45e-06	padi1	1.76856	0.0443413
						tiam1.L	-1.2603	0.0249737	slc2a1.S	1.89539	2.54e-10	senp7.L	1.76825	0.0273537
						capn2.2.L	-1.26387	0.00587951	ppfibp2-like.S	1.89449	0.00986149	LOC108705810	1.76628	0.00461184
						MGC130877	-1.26795	0.00198296	kiaa0586.L	1.89355	0.00134056	dus1l.L	1.76442	0.0463864
						erf.S	-1.27207	0.00243668	dpp10.S	1.89207	0.0428308	LOC108719643	1.76148	0.00774799
						cpxm2.L	-1.27459	0.0380295	rbbp8.S	1.88914	0.0273672	csnk1g2.L	1.76063	0.0133432
						hyal2.L	-1.27889	0.000311695	eya2	1.88674	0.000472184	loc100158410.L	1.76026	0.0477748
						arhgef2.S	-1.2813	0.00248914	abcc5.L	1.88582	0.0266509	nisch.S	1.75988	0.0352584
						LOC733426	-1.28374	0.000349874	LOC108699848	1.88561	2.39e-05	Xelaev18001402m	1.75829	0.0335136
						arhgef3.2.S	-1.28699	0.0141489	Xelaev18001991m	1.88511	0.00641206	cdc42se2-like.1.S	1.75793	0.00347424
						LOC108697654	-1.28771	0.0483285	fgf8.L	1.88293	0.0428861	slc26a6.L	1.75744	0.00081616
						nipal4.S	-1.29	0.00225313	LOC108716428	1.88275	0.00104998	sftpb.L	1.75431	0.0439454
						arhgap23.L	-1.29151	0.00183991	nfxl1.L	1.88142	8.58e-05	cnpy2.L	1.75234	0.0186913
						atp5a1.S	-1.29696	0.000324961	LOC108701404	1.88085	0.000187098	syt11.S	1.75221	0.0455867
						arhgef16.S	-1.29987	0.00253138	rab34.S	1.87915	0.0241909	LOC108703537	1.75121	0.00675352
						stk38l.S	-1.30088	0.000331813	LOC100036994	1.87879	2.49e-08	pex12.L	1.7494	0.0256372
						wap	-1.30427	0.0255106	Xelaev18018096m	1.87778	0.00452261	aifm3-like.L	1.7478	0.037765
						dpysl2.L	-1.30495	0.00823369	LOC108703763	1.87771	0.000478461	scarb2.S	1.74538	0.0154774
						xbp1.L	-1.30526	0.00621735	nuak2.S	1.87649	0.000502591	scpep1.L	1.74326	0.0139543
						tmem238	-1.30567	0.00501321	cebpd.L	1.87455	0.000112574	taf4b.S	1.74132	0.0200972
						tuba1cl.2.S	-1.30907	4.46393e-05	cd58	1.87166	0.00602573	ripk1.L	1.74109	0.025122
						syngr2	-1.31164	0.00721615	relb.L	1.87062	0.0076881	tmem265.L	1.73905	0.0317597
						jag1.L	-1.31186	0.0152462	macf1.S	1.86998	4.58e-09	slc25a34.L	1.73116	0.00407175
						efs.L	-1.31296	0.0227388	flt4	1.86831	0.000305815	commd5.L	1.73112	0.0189606
						myt1.L	-1.31809	0.00080816	klf9.L	1.86643	1.47e-06	pex11b.S	1.73102	0.000606373
						Xelaev18001896m	-1.32018	0.00161981	cyp2j2.L	1.86622	0.000929812	rasef	1.72904	0.0326179
						plpp2.L	-1.32028	0.000212099	ptpru.L	1.86533	0.0212721	lrig1.L	1.72346	0.00981745
						rfx2.S	-1.32062	0.00109869	LOC100496891.S	1.86513	0.00921003	loc733556.L	1.72087	0.0317225
						slc7a8.L	-1.32757	0.0486586	ubxn2b.L	1.86466	0.00232645	hbox10.S	1.72078	0.0336234
						tjp2.S	-1.32981	7.1464e-06	adamts10.L	1.86229	0.0173528	rmdn2.S	1.7204	0.0438413
						lnx2	-1.33245	0.0055757	bcl9l.S	1.86105	0.000159503	LOC108718087	1.71473	0.00859132
						sh3bp4.S	-1.33258	0.0039887	large.S	1.86081	0.00185897	LOC108695565	1.71466	0.0463056
						rgcc.L	-1.33675	0.000693885	abca4.L	1.86063	0.00613752	gprc5cl1.L	1.71437	0.0144218
						irf6.S	-1.33729	9.97265e-05	sptbn5.L	1.85844	9.87e-07	enox1.S	1.71253	0.0125833
						tp53inp2.S	-1.33753	0.00621735	pnma3	1.85742	0.004714	cuedc1.S	1.71126	0.0478151
						twsg1.L	-1.33762	0.031079	itgb4.L	1.85657	0.0110373	usp53.L	1.71027	0.0043434
						vgll4.L	-1.33862	9.24237e-05	LOC108719883	1.85654	0.022321	znf850.L	1.70948	0.0109456
						dpp8.S	-1.34389	0.00185473	gpd1.L	1.85532	0.000379926	cnih4.S	1.70898	0.0229556
						ralgds.S	-1.34423	0.0272427	ccnb1.S	1.85503	0.0174662	cdc25b.S	1.70498	0.00578909
						Xelaev18009532m	-1.36064	0.047585	a4galt	1.85425	0.0313241	als2-like.L	1.70497	0.000462162
						derl1	-1.37389	8.14606e-05	nxpe3l.2.L	1.85317	0.0352569	mn1.L	1.70489	5.64e-05
						Xelaev18007569m	-1.37456	0.00575741	Xelaev18012751m	1.85208	0.00877669	LOC108704201	1.70473	0.0243997
						ier5l.S	-1.37457	0.00027457	rbm46.L	1.85051	0.00177601	spire1.L	1.70378	0.0300732
						nav2.L	-1.3804	0.0032319	hes5.2.L	1.8494	0.0196458	rmi1.L	1.70043	0.000137398
						Xelaev18000435m	-1.38108	0.0170737	rusc1	1.84885	0.00178235	Xelaev18043700m	1.70019	0.0493425
						ankrd35.L	-1.38371	1.72827e-06	zcchc2.S	1.84829	1.15e-06	bcl9l.L	1.69984	0.0477528
						LOC108701168	-1.3855	0.00836377	cr1b	1.84823	7.84e-10	tep1.L	1.69914	0.0157857
						hipk2.L	-1.38869	1.78014e-07	Xelaev18047576m	1.84754	0.000113447	cldn6.2.S	1.69675	0.0038337
						ctf1	-1.39222	5.18453e-06	LOC108705899	1.84656	0.00390989	mfn2.L	1.69604	0.0265088
						fam3b.L	-1.39239	0.018742	wwc1.L	1.84571	0.0190798	gm39120	1.69496	0.0200972
						uck2.S	-1.39299	0.016482	LOC108705673	1.84562	1.24e-05	shroom2.L	1.69379	0.000734151
						creb3l2.L	-1.39615	0.00010706	usp54	1.84505	0.00021586	LOC108719517	1.69187	0.0316946
						msi1.L	-1.39846	3.77777e-06	ckap2l	1.84088	3.35e-06	c5orf30.L	1.68748	0.0233862
						bace1.L	-1.39919	0.00191569	nedd4l.L	1.84085	0.000169156	arhgef40.S	1.68539	0.0212538
						LOC108715137	-1.40349	0.00870166	gpr4.S	1.83914	1.38e-05	ehbp1	1.68518	0.0238859
						tmem45b.L	-1.40539	0.0203503	syt11.S	1.83806	0.0055773	parp9.S	1.68438	0.0179517
						tbl1x.L	-1.40942	0.028261	znf101	1.83791	1.71e-09	tuba4.L	1.68382	0.0438848
						cerk	-1.40973	0.00424947	upk2	1.83551	3.97e-08	LOC108717955	1.68033	0.00122786
						muc5acl.S	-1.41065	1.18698e-06	crebrf.L	1.8342	3.11e-06	mms22l.L	1.68027	0.00040224
						cenpv.L	-1.41188	0.0468807	stoml1.L	1.83299	0.0287771	grip1.S	1.67902	0.0467294
						dsg2.S	-1.4134	0.0230131	dtna.S	1.83126	0.0150826	tnrc18	1.67809	2.89e-05
						phospho1.S	-1.41414	0.0172339	frrs1l	1.82636	0.00608398	trib2.S	1.67752	0.0082586
						sgcg.S	-1.41674	0.00431539	tesk2.L	1.82405	0.000559448	large.S	1.67244	0.025843
						plxnb1.S	-1.4191	0.0316067	mtmr8	1.81661	0.00515184	Xelaev18002446m	1.66837	0.022231
						kiaa1324l.S	-1.41926	0.00819473	fbxo32	1.81642	0.0422994	hdx.S	1.66637	0.00528455
						rnls.L	-1.4231	0.021314	paqr5.L	1.81469	0.03834	arhgap29.S	1.66605	0.0230121
						c3ar1.L	-1.42316	0.0423824	LOC108719253	1.81445	0.000550327	lonp2.L	1.66481	0.0218797
						acvr1.L	-1.42398	1.51983e-07	itih3	1.81095	0.0304918	dda1	1.66474	0.00732025
						lin28a.S	-1.43596	0.000339331	coq10b.L	1.81033	1.24e-05	pvrl2.L	1.66409	0.0228527
						Xelaev18038622m	-1.4388	0.0424984	rhbdl1.L	1.80954	0.0167315	ppp1r14a.S	1.66046	0.00386459
						smad6.L	-1.4388	3.01574e-06	LOC108713747	1.80914	0.0453035	sema3f.S	1.65997	0.00253814
						eno1.S	-1.44358	0.00253863	spire2.L	1.80822	0.00735749	ccdc68.S	1.6583	0.00631324
						grasp.L	-1.44419	0.00624527	unkl.S	1.8078	2.44e-06	tle1	1.65637	2.6e-05
						arl4c.L	-1.44529	0.0277297	kcna3.L	1.80711	1.37e-05	boc.L	1.65095	0.00532181
						ptpn14.S	-1.44654	0.032096	etfa.L	1.80675	0.00497181	gfod2.L	1.65074	0.00206112
						chrna2.L	-1.45717	0.00126128	LOC108716731	1.80573	0.00496476	znf845	1.64969	0.000817129
						klf2.S	-1.45922	2.37634e-07	klf15.2.L	1.80519	5.92e-06	rhpn2.S	1.63806	0.00214223
						erf.L	-1.4627	0.00185542	usp43	1.80444	1.06e-05	rab34.L	1.63794	0.0411617
						tp53i11.L	-1.46466	0.0349752	fry.S	1.80111	0.032584	rasd1.S	1.63729	0.0302111
						rpl13.L	-1.46604	0.0134827	LOC100490918.L	1.80041	8.63e-07	baz2b.S	1.63308	0.0247052
						muc1.L	-1.47074	0.0178935	trank1.L	1.79861	0.00853056	c7orf60.S	1.63238	0.0079788
						pdgfra.L	-1.47628	0.0148179	man2a2.S	1.79778	0.0224718	LOC108711813	1.63102	0.00197488
						nbr1.L	-1.47648	0.00137654	plekhg1.S	1.79739	0.0245616	ddx11.L	1.63052	0.0155846
						selenbp1.L	-1.4804	0.0012324	Xelaev18003483m	1.79708	0.0458447	gmnn.L	1.62937	8.97e-05
						ulk1.S	-1.4807	0.022711	adat3	1.79632	0.0130662	LOC108704283	1.62748	0.00336288
						ckap4.S	-1.48324	0.000758129	Xelaev18022784m	1.79567	0.0180487	rhob.L	1.62523	0.0158348
						mxi1.L	-1.48436	4.12933e-07	tmem222.L	1.79442	0.000650723	sgk223.S	1.62481	0.00102571
						dnmbp.L	-1.4852	0.00445816	naip.L	1.79296	0.0469108	LOC108708787	1.62293	0.0317225
						grhl3.S	-1.49055	0.000121086	casd1.S	1.79286	0.0211779	gpi.L	1.6217	0.0155527
						LOC108719085	-1.49116	0.0120649	sgsm1.L	1.79209	0.0137034	LOC108703819	1.62051	0.0429345
						numbl.L	-1.49525	0.0314458	sowahc.L	1.79183	4.99e-05	plod1.L	1.62034	0.0177127
						asl.L	-1.50119	0.028382	slc43a2.L	1.79163	0.0003011	nrip3.S	1.61977	0.0293159
						rybp.L	-1.50941	0.00179368	caps2.L	1.79128	0.0121779	naxd.L	1.61886	0.0287992
						bdh1.L	-1.51129	0.00624527	sds.S	1.79012	0.000103227	jak1.L	1.61859	0.0390424
						LOC108704703	-1.51188	0.0349624	ddit3.L	1.78906	0.0283953	cmip.S	1.61587	0.00622882
						lin28a.L	-1.51274	2.67392e-06	ypel5.L	1.78872	0.00113742	tor1b.L	1.61552	0.026055
						clcnkb	-1.51685	0.0169813	itgb1bp2.L	1.78778	0.000581149	sycp2l	1.61503	0.0471017
						MGC76328.S	-1.51702	0.00297592	tnfsf11.L	1.78742	0.00749386	ptprm	1.61452	0.0470027
						foxo1.L	-1.51743	0.00570475	sall3.L	1.78687	5.02e-05	LOC495489	1.61379	0.0203309
						sema6a.S	-1.52247	0.00309465	il17b	1.78588	3.49e-05	acsf2.L	1.61372	0.00359294
						LOC108700849	-1.52296	4.47302e-05	reln.L	1.78582	0.0360173	lin28b.S	1.61344	0.00568726
						msi1.S	-1.5239	0.000458024	irx1.L	1.78414	0.00235435	appl1.S	1.61308	0.00267946
						fblim1.L	-1.52631	0.00909917	pou3f2.L	1.78288	0.00131565	epn1.S	1.60998	0.043839
						fam222a.L	-1.52639	2.83859e-06	stat1.L	1.78097	0.000287189	scp2	1.60952	9.75e-05
						runx1	-1.52832	0.00227213	coro6.1.L	1.7805	0.0437149	pnpla8.L	1.60872	0.0480565
						lrrk1.L	-1.5355	0.00441253	syne1.L	1.77777	1.12e-06	luzp1.L	1.60689	0.0313664
						shroom3.L	-1.5368	0.0025498	wee1.S	1.7776	7.56e-09	dmtf1.S	1.60472	0.0171502
						hras.L	-1.53699	0.0225101	rgmb.L	1.77627	0.0189429	tubb2b.L	1.6041	0.00821429
						ccnb2.L	-1.55696	1.84571e-07	dhx35.L	1.77417	0.0296534	syne1.L	1.60297	0.0143197
						tll1.S	-1.56066	0.00736575	slc29a1.S	1.77328	0.013551	gpc4.S	1.60228	0.0117088
						ubald2.L	-1.5613	0.000216354	Xelaev18031338m	1.77271	0.0143222	sox3.L	1.60142	0.0319611
						aim1.S	-1.57544	0.0021388	hpgds.L	1.77249	0.00933578	uchl3.L	1.60135	0.0158471
						b4galt3.L	-1.58212	0.00270038	LOC108713742	1.77238	0.0286558	LOC108716791	1.59971	0.0230839
						notch1.S	-1.5868	4.40858e-09	n4bp3.S	1.77176	0.0338819	cnpy2.S	1.59935	0.0474844
						pdgfa.L	-1.59156	1.73936e-05	sdpr.S	1.77026	0.0167315	stx2.L	1.59857	0.00105891
						ripk4.L	-1.59161	3.32771e-07	ypel1.S	1.76805	0.00491408	LOC100036828	1.59671	0.0441974
						Xelaev18036390m	-1.59828	0.00431539	nab1.L	1.76716	0.0484532	wasf3.L	1.59619	0.00420941
						b4galt3l2.L	-1.60226	0.00227657	b4galt5	1.76628	0.00687352	btbd10.S	1.59496	0.0353831
						lrrn1.S	-1.60268	0.00595561	irx2.L	1.76588	2.3e-05	ubtd2.L	1.59236	0.0390424
						ndst1.L	-1.60307	0.00102877	LOC108697433	1.76558	0.00851766	sdha.S	1.59094	0.00146804
						gatm.L	-1.6059	0.0418174	amot.L	1.76557	0.0173716	rexo5.S	1.59058	0.0119022
						pcdh9.L	-1.60745	0.00427594	znf585b.S	1.76372	0.000410882	gm21939	1.58882	0.0200172
						mxi1.S	-1.60812	1.66862e-07	cmtm8.L	1.76144	0.000460258	shroom1	1.58791	0.0217984
						btg1.L	-1.6102	7.95169e-08	loc100144919.L	1.75916	0.0236232	fam222a.S	1.58716	0.0473505
						tead4.S	-1.61316	0.000903183	LOC108695571	1.75773	0.000689513	myd88.L	1.58705	0.0208142
						Xelaev18000128m	-1.62024	0.000360614	lrrc14	1.75687	0.045797	smc1b.L	1.58575	0.0461623
						srrm4	-1.62313	0.017169	LOC108709196	1.75644	0.00562822	stk17a.S	1.58364	0.000668511
						kitlg.L	-1.62958	3.1475e-05	unc45b.S	1.7562	0.0389893	hpse.L	1.58183	0.0194304
						rbm47.S	-1.63376	0.000279011	LOC108700779	1.75521	0.0109517	trim37.L	1.58154	0.00406034
						LOC108703977	-1.6437	0.0437944	lcorl.S	1.75278	0.0499677	aldh1a2.S	1.58148	0.0199521
						depdc7.L	-1.6601	9.97798e-05	trim7.L	1.75176	0.00227721	grk3	1.58031	0.00687166
						xk81a1.L	-1.66311	0.00127254	LOC108719517	1.75122	5.41e-09	sh3bp4.L	1.57884	0.0152687
						fhl3.S	-1.66868	0.047958	ralgds.L	1.75098	0.00679279	snn.S	1.57564	0.0331222
						fpgs.S	-1.67211	1.40845e-07	slc30a10.L	1.74958	0.00481288	pomgnt2.L	1.57537	0.0194308
						sh2d3c.S	-1.67282	0.000376443	Xelaev18000460m	1.74927	3.65e-05	dnmbp.S	1.57432	0.00433039
						scg2.L	-1.67359	0.0460471	LOC108705640	1.74924	0.0208083	MGC115708.L	1.5715	0.0129416
						nrarp.S	-1.67426	3.14404e-06	LOC100191024	1.74752	5.17e-05	rrm2.2.L	1.57139	0.000281802
						capn13.L	-1.68136	0.0383618	ddhd2.S	1.74673	0.0299087	usp43	1.56984	0.015434
						fgfr1.S	-1.68981	0.00012773	urgcp	1.74619	0.00737771	atg9b.L	1.56952	0.0296805
						s1pr5.S	-1.69986	4.40021e-07	gtpbp6.S	1.74106	0.0003677	btbd8.L	1.56782	0.0200628
						LOC108704882	-1.70046	0.0346014	loc100145274.L	1.74032	0.00514093	LOC108714507	1.56745	0.0462525
						fzd10.S	-1.70682	0.00321495	znf703.S	1.73926	0.000162143	nsun4.L	1.5638	0.0155833
						abhd3.S	-1.70721	0.0105252	Xelaev18037842m	1.73881	0.0373122	prss36.L	1.56292	0.00208644
						cmtr2.L	-1.70834	3.40408e-06	loc108718661.S	1.73772	0.0271656	slc2a1.L	1.55985	0.00425044
						eppk1.L	-1.71757	0.0155608	meis1.L	1.73745	0.000598355	papd5.L	1.55964	0.00745195
						fgd4.L	-1.71988	2.7949e-08	klf15.2.S	1.73621	9.75e-05	tmem131.S	1.55731	0.0287992
						cfap43.L	-1.72093	0.0171003	cnnm1.L	1.73508	0.00360348	loc100144286.L	1.55454	0.00461184
						efnb3	-1.72101	0.0133461	ptprz1.L	1.73501	0.00197036	snx5.S	1.55445	0.0463776
						hnrnpr.L	-1.73458	0.00201998	arg2.S	1.73464	0.000335514	ripk4.S	1.55424	0.00453531
						fbln1.L	-1.73636	0.0408645	parp2.L	1.73357	0.0421313	rab11fip4l.L	1.5536	0.00201421
						ccdc181.S	-1.74184	0.0105661	dmpk.L	1.73319	0.00048164	usp44.L	1.55345	0.0422269
						dlx5.S	-1.74223	1.65028e-10	ttpal.S	1.73309	0.00508676	LOC100158299	1.55255	0.025815
						frmd4b.S	-1.74805	0.0149322	tnfsf11.S	1.73255	0.00576585	znf451	1.54637	0.0244316
						pdlim4.L	-1.75529	0.00650078	lurap1.L	1.7325	0.000413458	irs1.S	1.54417	0.0469028
						tfap2c.S	-1.75694	1.8509e-08	tgif2.L	1.73233	1.81e-05	satb1.S	1.5428	0.0410561
						pygm.L	-1.75837	0.0013496	Xelaev18013159m	1.73189	0.00516	ephb4.L	1.5418	1.92e-05
						cmklr1	-1.76385	0.0170737	ripk1.L	1.73099	1.5e-07	kalrn.L	1.54081	0.0035762
						snx22.L	-1.76821	0.0141948	MGC53786	1.72834	0.00484348	irf9.S	1.53962	0.0338373
						nxpe3l.6.L	-1.77046	0.0048099	LOC108695509	1.72675	0.00120302	dyrk3.L	1.53741	0.00073323
						gdf3.S	-1.77698	0.00277216	hdac5.L	1.72416	0.00807005	ephb4.S	1.53612	0.0296651
						rcn3.L	-1.77709	0.018016	oat.1.S	1.72376	0.000146562	slc16a9.L	1.52823	0.00501255
						dhcr7.L	-1.78112	0.000756574	phf19.S	1.72254	0.0324355	rab13.L	1.52612	3.75e-05
						fgfr4.S	-1.78457	6.30025e-10	igf3.L	1.72111	0.0489454	b3galt5	1.51876	0.0454801
						shroom4.L	-1.78713	0.00570475	loc100497555.L	1.72103	0.00558136	nuak1.S	1.51868	0.0233968
						alox12b.S	-1.78787	0.0147139	birc7.S	1.72089	0.00739476	trappc10.L	1.51376	0.0457172
						alpl.L	-1.79063	5.24439e-08	LOC108708360	1.72033	0.0117199	abhd12	1.51302	0.0345766
						sdk2.S	-1.79199	0.0287931	rin2.L	1.71501	0.00699123	LOC108716078	1.50685	0.0423776
						emilin2	-1.79325	0.0391243	LOC108705810	1.71432	6.93e-05	cdkn2c.S	1.50554	0.022486
						cfp.L	-1.79476	0.00643009	ptpn21.S	1.71348	0.00293823	thul16.S	1.50492	0.0336739
						gse1.S	-1.79524	6.24157e-05	cntd2.L	1.7129	0.00211593	kmt5a.L	1.50434	0.00885841
						efnb3.L	-1.7986	0.0086763	thop1.L	1.712	0.0120534	smo.L	1.50422	0.0255992
						tmem72.L	-1.80062	0.015641	stambpl1.L	1.71132	0.00518235	mst1.L	1.50407	0.000226114
						csrnp1.L	-1.80193	3.47437e-09	lipg.S	1.71055	0.00497387	robo3.S	1.50374	0.00759791
						slc22a4.L	-1.80203	0.0152161	rnf220	1.70833	3.73e-10	trpv6	1.50347	0.0115887
						LOC108709581	-1.81059	8.86388e-08	ccar1.S	1.70797	0.0468259	gas1.S	1.50188	0.00344573
						arhgef19.L	-1.81377	0.00348658	mid1	1.70777	0.0274623	lpar6.L	1.50186	0.0295621
						rhbdl3	-1.8147	0.00458824	ntng2.S	1.70746	0.0405837	st5.S	1.49666	0.0253824
						gse1.L	-1.81506	0.000157536	spata13.L	1.70716	2.6e-08	ccdc22.S	1.49348	0.00234513
						MGC84586	-1.8164	2.23776e-06	ano6.L	1.70623	0.00979387	c17orf53.S	1.49226	0.0260164
						igfbp2	-1.82837	0.00820685	LOC108700142	1.70571	0.00238379	LOC108702458	1.48968	0.00767254
						hars.L	-1.82852	0.00290879	dact1.S	1.70558	0.00358449	arhgef3.2.L	1.48701	0.0272887
						mfsd2a.L	-1.8414	0.0206331	has2.L	1.70543	0.00468607	notch2.L	1.48086	0.0157891
						zfp36l1.S	-1.84176	1.23887e-06	LOC108716070	1.70413	0.00266093	LOC108704637	1.47661	0.0469609
						cdkn1a.S	-1.84226	0.0288926	LOC108710894	1.69878	0.00771912	ogfod1.L	1.47482	0.0195831
						tph1.S	-1.84456	0.0035422	loc100145576.L	1.69807	3.29e-06	recql4.L	1.47448	0.00131936
						shb.S	-1.85148	0.000849956	LOC108702451	1.69775	0.0291651	prpsap1.S	1.4738	0.0014116
						xbp1.S	-1.86903	4.50058e-07	sorbs1.L	1.69759	4.39e-10	ppp1r3b.S	1.47018	0.00686055
						aplnr.S	-1.8712	0.0200006	Xelaev18003796m	1.69557	9.31e-07	cblb.L	1.46793	0.00170665
						LOC108716948	-1.87992	0.0357856	LOC108695538	1.69527	1.56e-06	znf182	1.46646	0.00707427
						slc38a3.S	-1.8802	0.0200946	adgre3	1.69217	0.0086317	frmd4a	1.46572	0.00781941
						nt5m.S	-1.88713	0.024647	tctn2.L	1.69214	0.000953838	tk1.L	1.46527	0.00113051
						creb3l4.S	-1.89659	0.000420766	Xelaev18001402m	1.69119	0.017067	srgap2.S	1.4652	0.00197911
						foxh1.2.L	-1.89919	1.00817e-07	LOC108698396	1.68949	0.000830812	nup214	1.46433	0.0136409
						ag1.L	-1.89989	0.0123431	fam110c.S	1.68909	5.94e-05	LOC108703844	1.46341	0.0139692
						prph.L	-1.90781	2.07387e-06	hist1h1t	1.68803	1.19e-06	c2cd2l.L	1.46012	0.0459805
						ubtd1.L	-1.90821	7.11981e-05	faxc.L	1.68728	0.000326466	ska2.L	1.45806	0.0252581
						rhou.L	-1.91407	1.39806e-10	lamp1.L	1.68655	3.67e-05	cebpg.L	1.45781	0.00643051
						LOC108701666	-1.91562	0.0114215	adamts1.S	1.68613	0.00387423	plin2.S	1.45716	0.0264683
						arhgap33.L	-1.91909	6.31067e-07	LOC108719542	1.68503	0.0221035	tlk1.S	1.45562	0.0359234
						tmem213.L	-1.92338	0.00593113	lrrc63-like.L	1.68393	0.0195776	ankrd50.L	1.45475	0.00684657
						mtus1.L	-1.93217	8.45645e-05	rspry1.S	1.68204	0.0433803	cep85l.L	1.45441	0.0297782
						gfpt1.S	-1.93407	2.12306e-06	fbxo31.L	1.68178	0.00035609	smtn.L	1.4534	0.0024074
						anxa4.S	-1.93956	6.70863e-05	ccdc102a.S	1.67953	0.031957	adh6.L	1.45215	0.0196122
						LOC108717200	-1.93969	0.0043511	LOC108702593	1.6789	0.00668753	rabl6.L	1.44969	0.0336361
						adad1.L	-1.94162	0.0499726	LOC108717350	1.67756	3.98e-07	LOC108704265	1.44958	0.0378541
						arl4c.S	-1.94339	2.18016e-05	alk	1.67708	0.00171131	pik3r3.S	1.44394	0.0129373
						nes.L	-1.94375	0.00425356	pex12.S	1.67693	0.0035161	znf91	1.44384	0.00854017
						grhl3.L	-1.94862	5.1315e-09	krt8.2.L	1.67655	0.01874	zfhx2.L	1.44343	0.00250615
						mmp14.L	-1.94932	0.000224627	sox11.S	1.67535	1.11e-06	jade3.S	1.443	0.0236066
						fdps.L	-1.95602	1.14955e-09	usp40.L	1.67443	5.82e-06	rad51d.L	1.43681	0.0396437
						zbtb7b.S	-1.9565	0.0080626	dapl1.L	1.67378	0.000760767	bcl2l12.S	1.43632	0.0470027
						nek2.L	-1.96978	0.00285436	syne2.2.S	1.67285	0.00328837	cgnl1.L	1.4358	0.0135571
						dip2a	-1.97774	2.37059e-07	dnajb5-like.L	1.67272	0.00250699	map3k8.L	1.43257	0.04755
						hunk.S	-1.98247	7.56791e-06	dusp5.L	1.67001	0.00146898	tmem2.L	1.43223	0.00604577
						fzd3.S	-1.99895	0.00161314	LOC108698109	1.66907	0.00382999	adrb2.L	1.42827	0.0436717
						MGC147188.L	-1.99937	0.0470601	fndc3a.S	1.6689	0.0032254	fat1	1.42742	0.0323724
						rasal1.L	-2.00737	0.00656301	plekhf1.S	1.6685	0.000324994	tspan7.S	1.42574	0.0184424
						ablim1	-2.01118	0.0257552	LOC108712736	1.66791	0.0222255	loc100145576.L	1.42261	0.0316946
						has1.S	-2.01246	1.15623e-07	Xelaev18019801m	1.66685	0.0056364	tex2.2.L	1.42199	0.045124
						laptm5.S	-2.0152	0.0225338	alg14.S	1.66594	0.0109912	galnt7.S	1.42125	0.0148709
						nudt22.L	-2.01935	2.60674e-14	dact3.L	1.66486	0.0105465	Xelaev18019575m	1.42016	0.0290391
						dhrs3.L	-2.02039	0.00807986	pex11b.S	1.66423	0.000700539	nme3.L	1.41812	0.00700482
						nkx3-1.L	-2.02071	0.0418893	cflar.S	1.66419	5.85e-05	arhgap33.S	1.41176	0.0271339
						asic2	-2.03046	0.0429616	nfx1.S	1.66381	0.000791865	rhobtb1.S	1.41041	0.0353158
						arhgef2.L	-2.03314	4.16144e-06	gli2.L	1.66277	0.00929184	rnf216.L	1.40776	0.0313962
						adra2a.L	-2.03603	0.00766513	papd5.S	1.6621	0.015111	slc29a2.L	1.40582	0.00723433
						gli3.L	-2.0369	0.00205841	relb.S	1.66202	0.0101492	panx1.L	1.40389	0.0194027
						MGC81482	-2.03842	1.20067e-06	nrp2.L	1.66161	0.0151048	LOC108703767	1.40105	0.0101694
						ccng1.L	-2.03941	1.03403e-06	henmt1.L	1.6613	0.00519983	sall4.L	1.39698	0.00488545
						sox17b.1.S	-2.04297	0.0371367	MGC81124	1.65959	0.0194878	LOC108709393	1.38845	0.0229556
						fam131a.L	-2.04711	0.00027457	loc100493164.L	1.65939	0.0110355	stat1.L	1.38459	0.0489294
						slc35c1.L	-2.05234	0.000531503	zbtb18.S	1.65845	0.0140275	natd1.L	1.38394	0.0284056
						adam33.L	-2.07846	2.964e-09	ints6.S	1.65801	1.56e-06	ppp1cc.S	1.38386	0.00105891
						notch1.L	-2.0792	1.24253e-15	rest.S	1.6538	0.00499124	prkcd	1.38376	0.00678347
						Xelaev18005463m	-2.08249	0.0464553	rasef	1.65353	2.43e-05	tsc22d3.S	1.38241	0.0428609
						ptger4.S	-2.08544	5.38159e-05	tbx15.L	1.65247	0.00485641	gnaq.S	1.38153	0.0215251
						gs17.S	-2.09367	0.000391121	dusp11.2.L	1.65082	0.00367985	chst2.L	1.37995	0.0463051
						elf1.L	-2.09374	1.09519e-05	ssh1.L	1.64827	0.00394437	ptp4a3.S	1.37731	0.00592674
						Xelaev18040914m	-2.09449	0.00724833	LOC108709286	1.64628	0.0140046	lifr.L	1.37544	0.000407697
						bag1.L	-2.10859	0.000159583	LOC108716078	1.64282	0.0223731	znf800.L	1.37069	0.00277294
						tmem138.L	-2.11301	0.000758701	fez2.S	1.64139	0.000622606	rassf8.L	1.37045	0.0165165
						golm1.L	-2.12142	0.0151323	napepld.S	1.64062	0.00441289	tbcd	1.36971	0.00673601
						LOC108698165	-2.12201	2.80725e-07	LOC108707871	1.64024	0.047553	pld1.L	1.36933	0.00694423
						Xelaev18038969m	-2.126	7.47168e-06	mpzl2.L	1.63896	4.81e-05	etv1.L	1.36932	0.0456472
						cdh26.S	-2.13163	5.90884e-05	hic2.S	1.63654	1.38e-05	fhdc1	1.36845	0.0396687
						elf1.S	-2.1338	3.67184e-05	sh2b3.S	1.63568	0.0394964	klf10.S	1.36664	0.0178624
						twsg1.S	-2.15246	1.71574e-05	rhov.S	1.63538	0.0015596	cwc27.S	1.36149	0.000996846
						klf5.L	-2.15351	7.15347e-09	e2f5.L	1.63526	0.00186213	znf800.S	1.36082	0.0157857
						LOC108718648	-2.16043	8.51165e-09	rhob.L	1.63407	5.48e-06	st3gal6.L	1.36036	0.0298691
						Xelaev18047127m	-2.17875	0.0176125	secisbp2l.S	1.62962	0.00276776	pde7a.S	1.35825	0.00484808
						bbox1.S	-2.18209	0.00414314	mypop	1.62875	0.0290992	cdh3.S	1.35627	7.45e-05
						prss12	-2.18415	0.0482512	traf4.S	1.62806	4.87e-06	gpr137c.L	1.35613	0.0189351
						kremen2.L	-2.19309	0.00628341	tsc2.S	1.62795	0.0198006	usp24	1.35442	0.0282818
						LOC108715136	-2.19513	1.14391e-05	hist2h2ab.L	1.62576	0.000186676	LOC108716731	1.35262	0.0353831
						gprc5b.S	-2.19833	0.000874734	kank1.S	1.62523	0.0419106	plcd3.L	1.35168	0.00595803
						MGC86483.L	-2.20029	0.0021668	tgif2.S	1.62444	6.88e-07	dynll2.S	1.34786	0.000460528
						sema4c.L	-2.20393	2.43732e-05	LOC108708787	1.62249	0.00016492	mtap.L	1.34743	0.00364056
						prph.S	-2.22061	0.00107996	LOC108716555	1.62123	0.0177982	elk1.L	1.34634	0.0184744
						ubp1.L	-2.22473	0.00270213	LOC108696875	1.62065	0.0220898	ccar1.L	1.34037	0.0125488
						slc22a31.L	-2.22762	0.0027542	sesn1.L	1.62062	0.00931786	mdfic	1.33959	0.0297782
						park7.L	-2.23206	0.00368568	col4a6.L	1.61982	0.00774498	mysm1.L	1.3374	0.00563499
						slc25a24.S	-2.2357	0.00116667	dstn.L	1.61954	0.00153092	tiparp.S	1.33694	0.010969
						has-rs.S	-2.24308	9.34121e-08	ttc5.L	1.61898	0.036926	pom121-a	1.33324	0.0121324
						dlx6.S	-2.24667	0.000120439	ripk4.S	1.61718	1.61e-08	dcp1a	1.33301	0.0265214
						klf4	-2.24863	8.45645e-05	irf6.2.L	1.61548	0.0185556	dusp5.S	1.32975	0.0179149
						znf217.S	-2.2528	9.37911e-08	Xelaev18035319m	1.60828	0.00358972	ankrd27.L	1.32901	0.0440802
						wdfy2.L	-2.25353	0.00253138	LOC108709819	1.6066	0.0138005	ranbp9.S	1.32783	0.0228527
						nrarp	-2.25739	7.57601e-15	slc26a6.L	1.60648	4.38e-07	ctsv.S	1.32781	0.00535875
						tfap2a.L	-2.26392	3.45366e-21	cdc42se2-like.1.L	1.60604	0.000826979	Xelaev18000460m	1.32474	0.0338373
						rreb1.L	-2.27714	3.06983e-12	mcoln2.L	1.60513	2.74e-05	nabp2.S	1.32316	0.00778085
						gprc5b.L	-2.27868	6.49834e-05	drosha.S	1.59929	0.00916826	shroom1.L	1.32248	0.0172703
						LOC108698139	-2.28481	0.0100441	supv3l1	1.59777	0.00172389	pcgf2.S	1.32136	0.0446404
						LOC108716735	-2.29289	0.00135196	e2f1.S	1.59726	0.00112121	znf451.S	1.32003	0.00307117
						scube2.L	-2.30901	1.1244e-16	map3k8.L	1.59699	0.000600284	polr2j.L	1.3162	0.0486795
						st3gal1.L	-2.31112	0.00272466	tmtc4.L	1.59651	0.00251417	acp5.S	1.3135	0.00108641
						arid3a	-2.31616	0.0262948	khk.S	1.59578	0.0327364	rcc1.S	1.3073	0.023671
						syt8.L	-2.31885	0.00200544	Xelaev18014773m	1.5941	0.015726	fam43a.S	1.30674	0.042394
						tbx3.L	-2.32236	0.00277172	bmf.L	1.59356	0.00170803	mccc2.S	1.30069	0.00555455
						fgfr4.L	-2.32274	2.83235e-13	LOC108704654	1.59313	0.0183386	sin3b.L	1.29895	0.00781354
						prickle2.S	-2.32531	0.00407352	LOC100037197	1.59301	2.41e-06	LOC108696887	1.29835	0.00743952
						fsbp	-2.33433	0.000157215	Xelaev18003021m	1.58685	0.00599769	pik3r2.L	1.29737	0.0361258
						rdd4.L	-2.33876	0.00119804	LOC108708225	1.58684	0.0271625	guca1a.S	1.29726	0.010969
						plaur	-2.35046	0.00203594	LOC108719459	1.58523	0.0286518	zfp989	1.29721	0.0475996
						tfap2c.L	-2.35552	1.26135e-10	tmlhe.L	1.58482	0.000708491	gucd1.S	1.29629	0.0217774
						rgs2.L	-2.35894	9.01637e-07	gmnn.L	1.58397	3.77e-09	pcid2.S	1.29161	0.000751176
						rassf10.L	-2.36641	0.00520716	slc16a12.S	1.58376	6.2e-05	taok1.L	1.29121	0.010586
						slc7a4.L	-2.37336	9.95884e-08	fosl2.L	1.58167	4.34e-05	tcf12.S	1.28657	0.0374543
						mix1.S	-2.3751	0.028261	jsrp1.L	1.58082	0.00167457	LOC100301958	1.28632	0.014713
						itga3.L	-2.37886	7.49235e-05	kank1.L	1.57965	0.0422407	zfhx2.S	1.28372	0.0413082
						kcnk5.S	-2.38256	1.5655e-15	LOC108704653	1.57926	0.0416419	ankrd50.S	1.28332	0.0320598
						LOC108711723	-2.38544	0.0305216	vmn2r26	1.57899	0.0288908	rad18.L	1.28295	0.0185393
						samd12	-2.38558	0.00425581	zbtb21.S	1.57896	0.000221277	acot9.L	1.27817	0.0109731
						pdgfa.S	-2.39188	0.00284922	ND5	1.5787	0.0164197	letm2.L	1.27803	0.0277099
						nptx2.S	-2.4088	0.00185542	tox3.L	1.57716	0.00121594	rhbdd3.L	1.27601	0.0154144
						lrrc56.L	-2.41288	0.00142134	cnppd1.S	1.57582	0.00103341	sp8.S	1.27469	0.0196486
						MGC80993	-2.42216	0.000348581	atp13a3.L	1.57495	0.000206941	gpr4	1.27443	0.00375739
						LOC108711628	-2.4286	0.0186109	scmh1.L	1.5743	0.0163969	mknk1.S	1.2686	0.0458081
						Xelaev18001656m	-2.43051	0.0028672	fech.S	1.57381	0.00564114	mospd2.L	1.26062	0.0154755
						tsku.L	-2.43689	9.46644e-08	tmem266.L	1.57228	0.0214777	gucd1.L	1.25686	0.0124421
						gnb3.L	-2.44689	0.000258876	fam13b.L	1.57212	0.0336289	trmt13.L	1.25685	0.0346252
						elavl3	-2.4472	7.65691e-08	rexo5.S	1.57206	0.000432415	zswim4.L	1.2555	0.0255668
						kiaa1324l.L	-2.46504	0.000117957	ccdc50.S	1.57138	9.82e-07	slbp.L	1.25498	0.00807183
						dlx2.S	-2.46565	8.6643e-08	tmcc3.S	1.57057	0.00188356	map3k15	1.25361	0.0464008
						bpgm.L	-2.46911	0.000115735	sgk1.S	1.56829	8.94e-05	ttc13.S	1.25133	0.0293942
						grhl1.L	-2.47438	1.71849e-08	mlxipl.L	1.56673	0.0243861	txlng.L	1.24791	0.0184273
						msx2.S	-2.48454	0.000177573	bcl9l.L	1.56439	0.00853908	cdt1.L	1.24535	0.00116394
						ccndx.S	-2.48472	0.00487134	rnd3.L	1.5628	1.14e-06	c2orf76.L	1.2444	0.0328845
						kctd15.L	-2.48931	0.00276556	mgat4b.L	1.56152	0.000187098	ccdc50.L	1.24078	0.0156637
						zfp36l1.L	-2.50214	3.00523e-09	sp5l.L	1.55849	0.00283965	hist1h2aj.L	1.23869	0.0110668
						tnni2.L	-2.50516	0.0227822	dnase1l3.S	1.55686	0.0474591	loc733726.L	1.23791	0.0178229
						comt.L	-2.50681	0.0161727	ago1.L	1.55462	0.0231978	rhpn2.L	1.23165	0.0199968
						Xelaev18043506m	-2.51929	0.0218327	LOC108703767	1.55295	1.36e-08	mtmr10.S	1.23133	0.0201342
						bmper.L	-2.52941	0.0219295	cbln1	1.55275	0.0277503	erbin	1.22418	0.00585358
						pcbp2.S	-2.5317	0.000138312	cchcr1.L	1.547	2.39e-08	cbfb.S	1.22202	0.0131075
						ahnak.S	-2.53854	2.70011e-10	slc25a34.L	1.54607	1.24e-05	sort1.S	1.22145	0.0190752
						tbx3.S	-2.54006	0.000304554	pitpnm2.S	1.54423	0.0164435	cep131.L	1.21822	0.0145577
						krt5.7.L	-2.54179	1.80801e-06	gab2.L	1.54352	0.00103341	fbf1.L	1.21736	0.0234575
						lef1.L	-2.54549	0.00503862	LOC108700251	1.54203	0.0159019	trmt5.L	1.21718	0.0033863
						prdm1.L	-2.55859	1.27834e-24	hk1.L	1.5416	0.00323983	pard6b.L	1.211	0.0437441
						capns1.L	-2.57061	2.42598e-06	loc100124990.S	1.54091	0.0453881	egln3.L	1.2101	0.0344993
						celf3.S	-2.59166	0.00129105	tmprss13.S	1.53837	0.0315336	stx6.S	1.20975	0.00113549
						fzd3.L	-2.59566	0.000233133	mrpl41.S	1.53735	0.02709	rassf7.L	1.20694	0.0144254
						itgb3.L	-2.60315	0.0464553	bloc1s6.S	1.53614	4.39e-09	bclaf3.L	1.20295	0.0490031
						thnsl2.L	-2.6068	3.08973e-08	cep85l	1.53522	0.0314084	hist1h1t	1.19877	0.0290247
						c2cd4d.S	-2.60733	0.0113242	LOC108719479	1.53353	0.00469489	haus6.S	1.19852	0.0264835
						arg1.L	-2.6077	9.61303e-11	tspoap1.L	1.53253	0.0345466	fnip2.L	1.19787	0.00888353
						cpe.L	-2.6199	0.0145439	bmi1.L	1.53237	0.000150188	cdc42bpb.L	1.19301	0.0416049
						slc9a3r2.L	-2.62243	0.00131054	ttbk1.S	1.53201	0.00198163	klf11.L	1.18899	0.0316946
						klf17.L	-2.62455	2.83681e-19	epha2.L	1.53136	0.000126839	zswim6.S	1.1883	0.00118877
						vill.S	-2.6292	0.00373088	gprc5cl1.L	1.5309	9.27e-09	tor1aip1-like.L	1.18585	0.0192309
						itga6.L	-2.63835	2.97875e-12	tpgs2.L	1.53042	0.032582	etv1.S	1.17906	0.0358484
						elovl3.L	-2.64252	1.84243e-05	LOC105945479.S	1.5303	0.015559	gramd4.S	1.17723	0.0251543
						amotl1.S	-2.64308	6.4121e-14	braf.S	1.52886	0.000452928	cdc6.L	1.1751	0.0187233
						dlk2.S	-2.64667	3.33508e-08	Xelaev18043700m	1.52828	0.00173522	ipmk.L	1.17215	0.00931736
						tead4.L	-2.66166	7.69939e-05	exd2.L	1.52717	0.00127768	znf101	1.16796	0.0477528
						col18a1.L	-2.66266	1.78425e-07	kcp.L	1.52575	0.0151048	alcam.L	1.16607	0.0302111
						pou2f3.L	-2.67801	0.00271278	prrt4	1.52501	1.45e-05	MGC82975	1.1638	0.0309627
						cdon.L	-2.67824	1.78425e-07	cdc14a.S	1.52477	0.00718567	pttg1	1.16144	0.0377529
						cxcl12.L	-2.68006	2.76789e-07	aebp1.S	1.52475	0.0119579	gldc.S	1.15572	0.0241396
						nodal.L	-2.6888	0.0147181	LOC108716019	1.52386	0.000169645	mutyh.L	1.14859	0.00161082
						MGC76328.L	-2.68948	6.77307e-19	Xelaev18007952m	1.52269	0.0262143	clca3.L	1.14849	0.00450107
						prss23	-2.68972	0.0109732	actg1.S	1.52254	2.53e-08	alas1.S	1.14568	0.0438305
						p2ry2.S	-2.69363	1.16835e-05	gabarapl1-b	1.52213	0.0446188	hmces.L	1.14456	0.0391073
						irf5.S	-2.70109	0.0305364	prss33	1.52078	0.0269658	mast3	1.14193	0.0179149
						lamb1.L	-2.70548	0.0130748	march8.L	1.52049	0.0287937	acap2.S	1.1392	0.0293042
						fam212a.L	-2.71259	4.03724e-09	syne2	1.52011	0.00308215	ip6k2.L	1.13781	0.0365816
						dusp7.L	-2.71338	3.50413e-08	trim37.S	1.51941	0.00162018	ppp1r3b.L	1.12945	0.0187176
						akr1c2.L	-2.72406	0.0039887	taf4b.S	1.51805	0.000592237	tcf12.L	1.1247	0.00238947
						tbx2.L	-2.72669	7.46031e-06	creg2.L	1.518	0.0433803	susd6.L	1.12147	0.00967861
						klf2.L	-2.73196	3.52224e-18	snx25.L	1.51642	0.022321	fam175a.S	1.12071	0.0413958
						sdc1.L	-2.73673	9.76131e-12	rbm20.S	1.51601	0.0289157	muc2	1.11604	0.0468259
						sncb.L	-2.74135	0.0313577	rassf1.L	1.516	0.0039324	tfap4.L	1.10931	0.00543573
						rreb1.S	-2.75433	3.92472e-13	tiparp.S	1.51562	0.000446389	crip3.S	1.10568	0.0208142
						fam198b.L	-2.75709	2.79289e-13	atp8a1.S	1.51428	0.000567263	yes1.L	1.10544	0.0123541
						msx1.L	-2.7664	3.43105e-09	MGC82975	1.51321	0.000135292	tmem158.L	1.09938	0.0461855
						crabp2.L	-2.7673	2.12306e-06	dennd4b.L	1.51187	0.0119419	shisa5	1.09283	0.045241
						MGC68858	-2.76864	3.90322e-07	pik3r3.L	1.51022	0.000922426	sh3bgrl.L	1.0924	0.0197554
						comt.2.S	-2.76947	0.0139653	dst.L	1.5101	0.00315959	mapkapk2.L	1.09213	0.0231045
						fgd4.S	-2.78461	9.6833e-06	tmem131.S	1.50816	0.000174066	ccne2.L	1.08659	0.0193158
						mcidas	-2.79179	0.0314959	il17ra	1.5069	0.00999442	phf20.L	1.08646	0.0280124
						rgs3.L	-2.79251	4.68561e-06	LOC108695519	1.50682	0.0196082	dyrk3.S	1.08557	0.0404838
						nr6a1.L	-2.79898	0.00500302	secisbp2l.L	1.50652	0.00409363	mcph1.S	1.08358	0.041876
						lrrc24.S	-2.80413	0.0366476	cdk5r1.S	1.5063	0.00432216	wrb.L	1.08134	0.034173
						vwc2l.2.L	-2.80856	0.00686051	tep1.L	1.50546	0.000165047	nup88.L	1.07813	0.037765
						dll1.L	-2.81264	8.02191e-08	irs1.S	1.50491	0.000129685	letm1.S	1.07685	0.0118238
						cep19.L	-2.81502	0.000271719	dmrt1.L	1.50328	0.0461059	kdm4c.L	1.0743	0.0380325
						klf4.L	-2.81837	2.95029e-22	LOC108707642	1.50298	0.0103261	coq5.L	1.06693	0.0336739
						gmnc.L	-2.83471	2.27942e-07	chka.L	1.5029	0.00339181	sestd1.L	1.06685	0.0130704
						adap1.L	-2.83629	2.69679e-05	shroom1	1.50195	0.00126663	ccne1.S	1.06288	0.00701182
						dlx6.L	-2.85209	0.000848576	dcbld1.S	1.50191	0.00161341	irs4.L	1.06246	0.0454477
						LOC108717439	-2.85354	4.71126e-05	LOC108706318	1.50074	0.000266581	fzd2.S	1.06008	0.0162368
						mab21l3.S	-2.91109	1.2008e-05	heatr5a.L	1.49773	0.000291134	mcoln1.L	1.05973	0.00984639
						id2.L	-2.95428	1.18324e-19	LOC108716739	1.49755	0.00082627	agtrap.L	1.05435	0.0297838
						dll1.S	-2.96184	7.55224e-09	cyp51a1.L	1.49706	0.000855929	fbxw7	1.05117	0.0166294
						tll1-like.1.L	-2.97051	1.02616e-05	gprc5c.S	1.49674	0.000804673	znf507.S	1.04686	0.0397515
						smad9.S	-2.98363	0.00012102	slc35f5.L	1.49391	1.3e-05	ptprz1.L	1.04659	0.0411154
						kcnk5	-2.98867	1.65202e-09	ceacam21	1.49309	0.00436854	ddx59.L	1.04098	0.035432
						shbg	-2.99602	0.000472227	klhdc10	1.49169	0.00841959	kmt5a.S	1.03683	0.0226317
						id2.S	-2.99891	3.50991e-14	mblac2.L	1.49115	0.0179417	znf239	1.03221	0.0391632
						smad7.S	-3.00232	1.25334e-19	trhde.S	1.49076	0.0297766	Xelaev18030357m	1.02983	0.0316065
						tsku.S	-3.00253	3.85888e-08	pcsk7.L	1.4899	0.000548604	ND2	1.02863	0.041494
						vash2.S	-3.00433	1.03762e-05	LOC108703744	1.48968	0.00541844	hsf2.2.L	1.01869	0.0175271
						LOC108696752	-3.00646	0.0481236	fam214a.S	1.4896	0.0234897	sall1.L	1.01702	0.0297254
						hesx1.L	-3.03224	1.97451e-08	znf219.S	1.48864	1.31e-05	tle4.S	1.01689	0.0203762
						fam110c.L	-3.03484	2.91883e-13	pxylp1.S	1.48751	0.0118989	epcam.L	1.01406	0.0190893
						dscaml1.L	-3.03769	0.000897237	dgkq.L	1.48398	0.00562822	rhebl1.L	1.0047	0.0203599
						MGC85509	-3.05613	0.0221338	jmy.L	1.4837	0.000279067	edc4.S	1.0044	0.0217742
						LOC108719420	-3.10019	0.00186982	ing4.L	1.48219	0.00299152	ufd1l.L	1.00338	0.0384022
						foxi4.1.L	-3.12384	3.98423e-09	LOC108700207	1.48125	0.0295596	limk2.S	1.00087	0.0230544
						smad7.L	-3.12681	7.95717e-27	cdkn2c.S	1.48065	0.000963255	ercc2.L	1.00004	0.0208308
						rhou	-3.13867	1.23303e-25	ciart	1.47807	3.82e-05	rfc4.L	0.988919	0.0113147
						gnb3.S	-3.1394	9.00994e-06	fbxl4.S	1.47658	0.00195815	mdc1.L	0.977787	0.0119851
						gfpt1.L	-3.15352	2.64181e-14	tle1	1.47654	3.11e-07	slc5a9.L	0.977547	0.015832
						ventx3.2.S	-3.15665	1.09441e-09	stambpl1.S	1.47262	0.0122704	rhbdd2.L	0.976973	0.0336489
						uts2r	-3.16348	1.68834e-07	hdac7.L	1.47202	0.000160673	nde1.S	0.967176	0.0228132
						capn8.S	-3.16435	3.56516e-14	pacs2.L	1.47162	0.00402289	got1.S	0.966166	0.0223013
						slc7a8.S	-3.18396	4.39146e-18	ccdc18.S	1.47039	0.0162874	rbbp8.L	0.965593	0.0227547
						pygm.S	-3.1879	8.48234e-13	suox.S	1.46929	0.000794097	rbm12b.L	0.951641	0.0328102
						fbln1	-3.1984	0.0447162	LOC108708239	1.46917	0.0245399	rrm2.2.S	0.941085	0.022828
						hs3st1.L	-3.21839	1.08118e-17	LOC108710827	1.46842	0.00751562	fktn.S	0.939952	0.0267538
						fkbp9.L	-3.22846	1.93735e-05	rabgap1l.L	1.46479	1.87e-08	Xelaev18008693m	0.920643	0.025235
						frmd4b.L	-3.27489	1.27834e-24	btbd10.S	1.46466	0.000251525	ppp1r9al.L	0.916818	0.0233852
						Xelaev18026345m	-3.28118	0.00200544	ubtd2.S	1.46433	0.00563311	stat3.2.L	0.897952	0.0449023
						mcidas.L	-3.29653	2.32684e-05	wbp2.S	1.46385	0.0333446	sap130.S	0.892007	0.0262387
						LOC108698406	-3.30772	0.000713519	e2f1.L	1.4626	0.00747126	n4bp1.L	0.888967	0.0446404
						eya1.S	-3.31468	1.13292e-05	elk1.L	1.46231	0.00341376	znf217.L	0.88016	0.0396687
						tfap2a.S	-3.32855	1.27889e-34	aplp2.L	1.46188	0.000151608	epcam.S	0.865888	0.0359902
						ltk.S	-3.33055	0.000213952	mcm9.L	1.46157	0.00984205	ctsv.L	0.860893	0.0499822
						LOC108701721	-3.35899	0.00880807	pnp.L	1.46148	0.0462467	pds5b.S	0.832635	0.0334766
						cdx4.S	-3.35913	0.000779998	mig30.L	1.45925	0.0115298	slc25a29.L	0.787708	0.0459316
						spdef.S	-3.36039	0.00153801	optn.S	1.45778	0.00525147	nktr.S	-0.831718	0.0413467
						vgll4l.S	-3.36207	1.9617e-19	zfand2a.L	1.45738	0.00606175	prkar1a.S	-0.867657	0.0473364
						lsp1.L	-3.36807	5.83075e-05	LOC108708228	1.45686	0.013099	prrg4.S	-0.878836	0.0495983
						foxf1.L	-3.38518	0.000445818	atp13a4.S	1.45629	0.0458135	tuba4b.S	-0.888323	0.0442852
						Xelaev18026836m	-3.40298	0.0238078	acot1	1.45308	0.00733591	ube2e2	-0.888866	0.0200972
						bspry.S	-3.40344	0.0195822	gprc5c.L	1.45173	0.00524138	ap1s1.L	-0.902214	0.0461623
						pnck.S	-3.40602	0.00425356	LOC108698739	1.45165	0.00101212	dsp.S	-0.908675	0.0342334
						LOC108717369	-3.41001	2.98474e-08	adipor1.S	1.45159	0.001713	adrm1.L	-0.914364	0.0348486
						pcp4.S	-3.42212	0.0116214	cass4.L	1.44986	0.00135688	phb2.S	-0.918719	0.0444026
						LOC108699846	-3.44678	0.00456989	spg11.L	1.44975	0.0427004	slc20a1.L	-0.919175	0.0196036
						Xelaev18045499m	-3.44929	0.0039709	pgm1.S	1.44872	0.000236159	cyth1.S	-0.922284	0.0170117
						LOC108712538	-3.49181	1.77832e-25	LOC108703754	1.44625	0.00817872	pim1.S	-0.926479	0.0216473
						foxi1.L	-3.52384	9.49001e-08	zfp989	1.44597	0.000336377	rtn3.L	-0.927605	0.0360061
						LOC108717691	-3.53854	0.000997021	rabgap1l.S	1.44533	3.52e-06	bcor.L	-0.93015	0.0392402
						grhl1.S	-3.54834	8.03659e-21	tnik	1.44422	0.00623069	ovol2	-0.940599	0.0127676
						rbm38.S	-3.55754	1.40845e-07	mov10l1.L	1.4421	0.0348601	nme2.L	-0.942891	0.0264683
						hes5.1.S	-3.56286	0.00515535	LOC100489607.1	1.44108	0.0247515	csrnp1.L	-0.942994	0.0218753
						zc3h12c.S	-3.58378	0.00252215	hs3st3a1.S	1.43996	0.0290765	slc16a7	-0.950567	0.0468572
						Xelaev18041737m	-3.59758	0.00562844	LOC108695555	1.43847	0.0330982	arvcf.L	-0.965479	0.00601587
						id3.L	-3.60006	6.4674e-24	LOC108719577	1.43845	0.0196473	bcl2l13.L	-0.966904	0.0192788
						pkp3.S	-3.62856	1.56883e-16	h1foo.L	1.43815	0.0453861	slc30a1.L	-0.973372	0.0216473
						tnfrsf12a.L	-3.66663	0.0180167	alcam.S	1.4379	5.16e-07	faim.L	-0.973918	0.044547
						fam3d.S	-3.67402	0.00386317	st3gal5.L	1.43736	0.0185771	ensa	-0.978036	0.0428609
						id4.S	-3.68896	3.09999e-14	trim66.S	1.43669	0.032868	ext2.L	-0.97822	0.0100499
						slpi	-3.70595	0.0116129	tgif1.L	1.43452	0.00234744	sdf2l1.S	-0.98523	0.0165593
						dlx5.L	-3.70668	8.13876e-38	sbno2.L	1.43449	0.00115703	hyal2.L	-0.990747	0.0492954
						loc108705532.L	-3.70705	0.011721	sox9.L	1.43377	0.0401901	stk39.L	-0.991466	0.0474539
						sox18.S	-3.71652	1.17517e-24	LOC108716397	1.43351	0.0337959	xbp1.L	-0.993758	0.0322979
						krt5.7.S	-3.71742	0.00231182	frmd6.L	1.43268	0.0321875	rc3h1.L	-0.994774	0.0470027
						fam83a.S	-3.74268	0.0001947	dsc3.S	1.43209	0.020547	atp8b1.S	-0.994973	0.0185393
						dlx3.L	-3.75427	2.91588e-10	scpep1.L	1.43207	0.00397069	atp5f1.S	-0.99771	0.0351075
						elavl3.L	-3.7573	2.7522e-15	cep164.L	1.42988	0.000219436	ap1ar.S	-1.00104	0.0441974
						trim29.L	-3.78583	0.000323457	Xelaev18004563m	1.42845	0.00566142	dnajc5	-1.00172	0.048718
						ptpn5	-3.80404	0.0375323	LOC108699095	1.42767	0.000243364	dgat1.L	-1.0021	0.00521315
						LOC108715806	-3.80529	0.000296697	robo3.S	1.42557	0.0012882	vdac1.L	-1.01756	0.021465
						s100a2	-3.82515	1.07043e-15	sox9.S	1.42536	0.00609723	rplp1.L	-1.018	0.0345208
						msx2.L	-3.9132	2.50821e-16	dgat2.L	1.42506	0.0033355	ywhaq.S	-1.02703	0.0310033
						LOC108699375	-3.96133	0.0230217	hook1.S	1.42391	0.00542636	esyt2.L	-1.02788	0.0376018
						trim29.S	-3.96753	3.27394e-09	znf414.L	1.42377	0.0402779	zbtb10.S	-1.03241	0.0036122
						cxcl12.S	-3.96819	2.23988e-08	prr14l.L	1.4205	0.0149888	LOC108709567	-1.03361	0.0436499
						fzd6.L	-3.97235	1.0177e-17	mink1	1.41876	0.00199345	efna4.L	-1.03765	0.0229556
						capn8.1.S	-3.98867	5.63433e-06	plin2.S	1.41749	0.00314508	tmed1.L	-1.04086	0.0228566
						LOC108705852	-4.13752	0.04218	Xelaev18022009m	1.41468	0.00344426	lasp1	-1.04184	0.0124882
						stard13.S	-4.14434	1.1353e-19	snx7.S	1.41365	0.0231479	stk24.S	-1.04518	0.0124882
						col5a2.L	-4.18891	0.00474252	kmt2c.S	1.41354	0.000171351	spryd7.L	-1.04764	0.0190327
						fam212a.S	-4.18972	1.31842e-15	hdac11	1.41122	0.0299643	cbs.S	-1.0534	0.00668664
						onecut1.2.S	-4.19578	4.63717e-13	grtp1.S	1.41121	0.0016715	ost4	-1.05359	0.0423776
						lrrn1.L	-4.19986	6.97487e-22	LOC108702355	1.41089	0.00106801	hdgf.S	-1.05562	0.0374064
						id3.S	-4.20851	1.25007e-48	vcan.L	1.4099	0.0258972	copg1.S	-1.05596	0.0366086
						bambi.S	-4.28696	1.21907e-39	ttyh2.S	1.40902	0.0228306	arpc5l.L	-1.06095	0.0279835
						gata3.L	-4.28928	7.02203e-14	atg4c.L	1.40866	0.00373414	ube2g2.L	-1.06698	0.0359819
						arhgap25.L	-4.29202	0.0045197	cdc7.L	1.40807	0.00107112	nsf.L	-1.06747	0.0272221
						lmo4.2.L	-4.31231	8.46703e-28	gpm6b.S	1.40569	0.00208137	acss2.1.L	-1.06872	0.0296651
						LOC108701176	-4.3127	0.00162488	zfyve28-like.1.S	1.40559	0.00291279	ap1m2.S	-1.07266	0.0205437
						gata4.S	-4.34629	1.94025e-05	stk40.L	1.40535	0.00119242	ppara.S	-1.07629	0.0331832
						LOC108700059	-4.35191	0.0100331	sorl1.L	1.40494	0.000169663	MGC84194	-1.08252	0.0223013
						dlx3.S	-4.3819	1.5719e-18	vwf.L	1.40393	0.021477	itm2a.L	-1.08975	0.00309204
						lmo4.2.S	-4.40603	4.43971e-39	loc733556.L	1.3998	0.00893667	rreb1.S	-1.09003	0.00141783
						ano9.L	-4.42309	9.64244e-05	abca2.L	1.39967	0.00122249	cluh.L	-1.09173	0.00544525
						Xelaev18017809m	-4.43366	0.000343587	usp53.L	1.3988	1.07e-07	ttc25.L	-1.09586	0.0430822
						ventx1.2.S	-4.46242	3.38825e-26	boc.L	1.3988	0.00383716	chrac1.S	-1.10187	0.00965546
						gata3.S	-4.49791	5.54748e-12	socs3-like.1.L	1.39775	0.00721085	mtdh.L	-1.1037	0.0310451
						ventx3.2.L	-4.532	3.27605e-18	tctn1.L	1.39763	0.00442958	rbm24.L	-1.10573	0.0237733
						esrrg.S	-4.66446	0.000202524	myd88.S	1.39743	0.000216095	adam15.L	-1.11233	0.0261938
						foxi4.2.S	-4.75972	3.94249e-117	LOC100127794.L	1.39585	0.0207449	arl2bp.L	-1.11357	0.0217984
						cdx4.L	-4.76246	1.59633e-07	mras.S	1.39454	0.0483855	erf.L	-1.11466	0.0255847
						amotl1.L	-4.77031	3.89833e-15	ccdc50.L	1.39346	0.00387206	xkr5.L	-1.11548	0.0308082
						bambi.L	-4.79851	9.32312e-51	far1.S	1.39322	0.00594887	evpl.L	-1.12007	0.0376079
						esrrg.L	-4.80505	0.000112688	ncoa2.L	1.38958	4.02e-05	mfge8.L	-1.12498	0.0190327
						cygb.L	-4.84765	0.00631683	rab9a.L	1.38565	0.0449229	arfgap3.L	-1.12672	0.0192309
						krt12.S	-4.86503	0.00185514	dars.L	1.38523	0.000329666	suox.L	-1.12854	0.0113147
						slc6a8.S	-4.87398	3.08885e-21	alcam.L	1.38247	3.01e-07	esyt3.S	-1.12878	0.0436499
						Xelaev18040657m	-4.88044	0.0334282	ror2.L	1.38198	0.00310964	brca2.L	-1.13057	0.0425869
						Xetrov90024133m.S	-4.96037	0.00389591	ccng2.L	1.38005	0.0186734	LOC108698246	-1.13181	0.0398334
						dlc.L	-4.98337	3.80708e-18	tuba4a.S	1.3765	0.0341686	slc35b1.L	-1.13335	0.0306388
						crabp2.S	-5.00161	8.20857e-08	nr1i2.S	1.37641	0.0174662	emp2.S	-1.13489	0.00885077
						npnt.S	-5.01573	7.38667e-09	atoh1.S	1.37629	0.0384816	arfgef2-like.L	-1.14519	0.0168413
						stard13.L	-5.02411	5.0317e-53	col27a1.S	1.37489	0.0429181	ankrd50	-1.15042	0.0133432
						ventx2.1.S	-5.04234	1.23354e-39	znf84	1.37315	0.0439114	ufsp2.L	-1.15209	0.0173792
						msx1.S	-5.05626	2.49664e-29	actg1.L	1.37194	1.48e-05	tiam1.L	-1.15222	0.0151223
						LOC108703739	-5.152	1.31812e-05	hectd4.S	1.37186	0.00260286	gng5.S	-1.15265	0.00619812
						nkx1-2.L	-5.16904	0.0173022	zfp36.S	1.37034	0.00590215	rab6a.L	-1.15303	0.00565916
						bmp7.1.L	-5.27426	3.92472e-13	tmem25.L	1.37025	0.0335303	bace2.L	-1.15473	0.0297782
						foxi4.2.L	-5.29795	1.47698e-87	tcim.L	1.36855	0.0423822	LOC100486385.S	-1.15492	0.00139805
						loc100496187.S	-5.30641	0.0116928	LOC108709818	1.36775	0.00186382	cab39l.L	-1.15695	0.0218769
						foxf1.S	-5.45855	3.5531e-05	LOC108719267	1.36496	0.0120182	clint1.L	-1.15821	0.0461623
						gata2.L	-5.53994	6.93848e-47	gpr65.S	1.36495	0.0328914	acsl1.L	-1.15917	0.0284056
						gata2.S	-5.58068	1.45257e-40	loc100127659.L	1.36467	0.00446218	crb3.L	-1.15942	0.0258527
						Xelaev18025906m	-5.64232	0.023158	scaper.L	1.36302	0.0211671	pou5f3.1.L	-1.16183	0.00390411
						dgkb.S	-5.6456	0.000531503	rasgef1b.L	1.36299	0.0193962	arnt.S	-1.16566	0.0328047
						mespa.S	-5.64616	1.87375e-05	znf608	1.36071	5.46e-07	hsph1.S	-1.16656	0.00965987
						foxi4.1.S	-5.7146	4.54673e-39	LOC108704394	1.3601	0.00172389	ano5.L	-1.16699	0.00461184
						nxph4.S	-5.75163	0.045989	osbpl3.S	1.35746	0.0340882	creb3l2.L	-1.16803	0.00732025
						nmur1.L	-5.76421	0.00839072	LOC108714350	1.35663	0.000252279	rundc1.L	-1.16835	0.0293052
						fam132a.S	-5.85073	0.011895	ska2.S	1.35661	0.0370162	LOC108718647	-1.16969	0.00236531
						zc3h12c.L	-5.94214	4.73226e-07	agpat5.L	1.35615	0.00528689	pkp2.L	-1.17486	0.00191063
						ventx1.1.S	-5.94895	3.00291e-37	gcnt3.S	1.35555	0.019557	irak2.L	-1.17563	0.0458924
						LOC108716616	-6.03152	0.0324645	foxm1.L	1.35543	0.0193178	palm3-like.L	-1.18136	0.0168254
						ventx2.2.L	-6.39432	5.0317e-53	dgki	1.35537	0.0495147	stambp.L	-1.184	0.0441974
						rorb.L	-6.48488	0.000822613	cntln.L	1.35234	0.00679279	zbtb10.L	-1.18497	0.0282095
						foxi1.S	-6.75803	1.11869e-30	LOC108704254	1.35217	0.000474487	c5orf15.S	-1.18686	0.0467294
						sox18.L	-7.20753	1.87605e-08	LOC108718087	1.35217	9.49e-08	nr1i2.L	-1.18928	0.00185316
						LOC108695290	-7.3183	0.00115249	pik3ca.L	1.35216	0.0166634	smad4.2.S	-1.1908	0.00599195
						szl	-7.50719	2.55207e-48	gpr155.S	1.34982	3.91e-05	LOC108700229	-1.19146	0.00894175
						ventx1.2.L	-7.78295	4.47471e-76	c15orf39.L	1.34972	0.000605545	cdk1.S	-1.19196	0.0408783
						ventx2.1.L	-7.91436	1.47698e-87	LOC108696281	1.34743	0.0176139	wwtr1.L	-1.19291	0.0319071
						grap2.L	-8.10835	0.0111607	srebf2.L	1.34634	0.00444413	slc35a2.S	-1.19295	0.0134203
						ndst3	-8.64232	0.0186597	xrcc2.L	1.34569	0.0112023	st3gal3.S	-1.19448	0.0167656
[truncated: 3,077 more rows]

## Sheet: Endo-Meso
List of all genes differnetially expressed between endoderm and mesoderm lineages and their Log2 Fold Change and pvalue corresponding with supplemental figure 6A
Transcription Factors in bold and and percentage TF calculated at bottom of each gene name column. Positive Log2FC values are genes higher in meso, negative Log2FC values are genes higher in endo.
Gene Name_Endo-Meso_st10	log2FoldChange_Endo-Meso_st10	padj_Endo-Meso_St10	Gene Name_Endo-Meso_st10.5	log2FoldChange_Endo-Meso_st10.5	padj_Endo-Meso_st10.5	Gene Name_Endo-Meso_st11	log2FoldChange_Endo-Meso_st11	padj_Endo-Meso_st11	Gene Name_Endo-Meso_st12	log2FoldChange_Endo-Meso_st12	padj_Endo-Meso_st12	Gene Name_Endo-Meso_st13	log2FoldChange_Endo-Meso_st13	padj_Endo-Meso_st13
Xelaev18006086m	9.6674	2.06e-11	Xelaev18006086m	9.68855	2.71e-11	Xelaev18006086m	9.37723	1.37133e-11	pnliprp1	10.371	3.25e-13	LOC108719743	11.477	1.67e-10
clvs1.S	8.31765	0.000134713	s1pr5.L	8.71163	1.27e-39	s1pr5.L	9.33576	2.48081e-32	slc23a3.S	9.72618	0.048324	fcgbp	11.4668	3.5e-122
LOC108695228	7.94359	7.36e-07	slc23a3.S	8.15873	0.0172346	gmnc.L	8.93508	9.67046e-09	grhl3.L	9.46294	5.57e-151	fucolectin.S	11.3924	6.7e-17
sf1	7.15311	7.99e-05	LOC108695228	8.15543	3.13e-08	cdx4.L	8.82841	6.5792e-19	s1pr5.L	9.34287	1.14e-32	pnliprp1	11.3567	6.38e-27
gem.L	7.12113	0.00138738	gmnc.L	7.6602	4.94e-05	slc23a3.S	8.08066	8.17357e-05	krt12.S	9.23125	4.66e-155	otog.L	11.2878	1.58e-109
ventx1.2.L	7.09467	1.6e-18	casq1.S	7.31108	0.00223862	cdx4.S	7.97408	2.05338e-25	hes3.3.L	9.18584	4.74e-11	krt12.S	11.2552	2.66e-94
morc1	6.97399	0.000349888	post9p.L	7.09573	5.12e-05	LOC108695228	7.78745	0.00193555	hes5.3.S	9.17739	3.76e-11	krt12.L	10.9866	1.62e-19
cpt2.L	6.60642	0.00418967	clvs1.S	7.01397	0.00097679	szl.L	7.45746	2.79747e-57	grhl3.S	8.91361	1.04e-166	LOC108719498	10.644	3.93e-16
rnf14.3.L	6.56742	0.00158257	foxi4.2.L	6.79845	1.89e-136	grhl3.L	6.96626	2.46471e-71	hes5_X2.S	8.84308	2.59e-12	onecut1.2.S	10.502	9.74e-08
Xelaev18003561m	6.46942	0.00327376	hes3.S	6.70818	2.12e-06	fut6.S	6.73724	2.9644e-06	fcgbp	8.7126	1.42e-163	Xelaev18032572m	10.3722	3.48e-15
tmem132d.L	6.33634	0.0147421	retn.1.S	6.62352	0.00114433	LOC108697113	6.7073	0.000566933	Xelaev18006086m	8.38412	1.06e-08	grhl3.S	10.0954	8.53e-108
mrpl44.L	6.30903	0.013284	tnnt1.S	6.57239	0.00528312	hes9-1.L	6.69439	6.40294e-05	fucolectin.S	8.38158	2.32e-12	LOC100145533.L	9.74018	1.42e-14
tmem132b	6.23059	0.000814814	morc1	6.5163	5.72e-05	szl	6.40358	5.19408e-42	LOC100145533.L	8.37626	7.91e-09	atp13a-like.L	9.54421	1.25e-37
Xelaev18016870m	6.14393	0.0247105	xmc.L	6.51557	0.000459247	LOC108716311	6.39067	7.88175e-05	hes8.L	8.30797	1.82e-08	Xelaev18029603m	9.44856	1.96e-11
ventx1.1.L	6.11157	0.0187962	gem.L	6.46095	0.0247315	arhgap25.L	6.37929	0.0219625	btc.S	8.26165	1.88e-12	tp63.S	9.39779	7.11e-28
LOC108716311	6.00224	0.0167862	sf1	6.31943	4.37e-06	tmem213.L	6.34784	3.02354e-05	fut6.S	8.20394	1.23e-12	hoxb4.S	9.36449	1e-11
itln1.L	5.82425	0.0290855	gstt1	6.24427	0.0124218	LOC100488577.L	6.28199	0.00158264	Xelaev18000716m	7.88893	4.34e-08	retn.1.S	9.28753	0.0488998
dnah1.L	5.69941	0.000224764	tmem213.L	6.195	0.00212315	btc.S	6.23861	7.42452e-10	cdx4.L	7.77481	2.09e-08	LOC108701744	8.95192	9.85e-11
klhl29.S	5.68141	0.0298086	LOC108710772	6.18066	0.0138766	grhl3.S	6.18346	3.1222e-32	creb3l4.L	7.72908	1.04e-07	adgrf1.L	8.66799	3.22e-27
LOC108717259	5.64933	1.72e-31	p2ry2.S	6.15895	6.86e-06	krt12.S	6.1584	9.96874e-48	LOC108701744	7.56192	2.86e-07	LOC108701743	8.64159	3.24e-14
Xelaev18000477m	5.56427	0.00995513	fut6.S	6.11099	0.00321406	dlc.L	6.14016	2.03282e-40	klf2.L	7.50509	1.11e-78	LOC108701747	8.49149	2.15e-09
LOC108714180	5.36669	0.0245386	slpi	6.0803	0.0187021	znf750.S	6.13534	1.5177e-51	LOC100497061.L	7.45783	5.15e-05	gmnc.L	8.46519	2.73e-08
mid1ip1.S	5.33246	0.0390836	vgll4l.L	6.07491	4.62e-33	zbp1.L	6.13343	0.000270972	foxi1.S	7.38011	3.69e-17	grhl3.L	8.43069	6.14e-103
tRNA-Lys	5.16199	0.0410285	sf1.L	6.07359	0.00037938	sf1	6.10819	0.0196224	slc30a10.S	7.33822	1.62e-28	loc100158267.L	8.42766	2.65e-09
ptprt.S	5.15346	0.0410285	Xelaev18003561m	5.94222	0.00606562	gstt1	6.07163	0.00224334	vsig8.L	7.18269	4.55e-26	hes3.3.L	8.39126	1.11e-23
LOC108698170	5.14842	0.0383857	LOC108716311	5.80395	0.00921363	kremen2.L	6.05313	1.46151e-12	cdx4.S	7.15162	2.06e-37	dlx3.S	8.33939	5.96e-13
eci1.S	4.71797	0.00295789	Xelaev18016870m	5.80298	0.0244015	foxi4.2.L	6.03269	1.67357e-21	hes9-1.L	7.07748	3.09e-16	fut6.S	8.31642	5.29e-22
sf1.L	4.67444	0.00746805	LOC108697113	5.77897	0.0137514	morc1	6.00015	0.00112951	otog.L	7.01532	5.38e-98	cmahp.L	8.16139	2.28e-21
hes3.1.S	4.63974	1.63e-17	cdx4.S	5.76555	0.0215046	Xelaev18000067m	6.00008	0.00185054	foxi1.L	6.99665	8.84e-18	pou2f3.L	8.124	6.13e-23
ventx1.1.S	4.4405	4.96e-08	tmem229b.L	5.76004	0.0289155	ventx3.2.S	5.98037	4.55579e-32	znf750.S	6.89107	3.96e-75	hoxa9.S	8.04424	1.31e-07
rack1	4.33976	0.0177142	fgb.L	5.75104	0.0371351	hes5.3.S	5.97732	0.000303262	cdx2.S	6.89023	4.6e-26	LOC108695467	7.98669	1.32e-07
adal.L	4.11674	0.00507532	tmem132b	5.68167	0.00591369	lmo4.2.S	5.86838	9.05146e-64	wnt3a.L	6.81845	6.14e-05	Xelaev18002015m	7.98097	3.08e-07
s1pr5.L	4.07667	2.52e-13	LOC108714180	5.53532	0.0342993	tmem132b	5.77406	1.07151e-05	tRNA-Lys	6.80142	2.3e-05	cdx4.L	7.8834	8.29e-34
LOC108714611	4.05856	0.00138738	Xelaev18008394m	5.52407	0.00385203	klf4	5.74886	4.59466e-10	LOC108719743	6.78461	6.47e-09	hoxa7.S	7.86298	1.33e-05
dmrt3.L	3.97562	0.000656978	gjb3l.L	5.5034	0.00619199	MGC115325	5.73081	0.000972806	dlx3.S	6.75845	1.59e-64	LOC108705956	7.85576	2.07e-07
ventx1.2.S	3.84925	7.44e-07	LOC108717259	5.44281	1.97e-24	tnfrsf12a.L	5.68567	0.000420248	LOC108705956	6.75365	7.87e-05	foxi1.L	7.84807	2.34e-07
hes3.S	3.79707	3.67e-06	foxf1.L	5.42232	0.0286855	klf2.S	5.64306	4.04154e-67	ankrd22.S	6.71088	7.77e-07	gsg1.S	7.81547	1.76e-07
dlx5.L	3.78216	0.00103372	btc.S	5.37969	0.0082513	aadat.L	5.64289	0.021912	krt12.L	6.66865	2.72e-27	ttc22.L	7.80686	8.58e-28
vgll4l.L	3.65996	4.53e-14	klf4	5.36667	4.34e-14	Xelaev18000716m	5.62784	0.00114511	gmnc.L	6.62013	7.97e-13	ano9.L	7.77983	1.25e-73
tuba1a.L	3.47804	5.86e-09	fzd4	5.35705	1.39e-06	klf17.L	5.59696	1.92373e-39	Xelaev18045499m	6.61279	6.96e-19	gck.L	7.72004	7.73e-10
foxi4.2.L	3.37309	7.25e-07	hes5.2.L	5.31002	0.0340879	Xetrov90017200m.1	5.48848	0.0278784	ano9.L	6.59523	9.38e-95	bspry.S	7.71639	1.5e-05
LOC108712697	3.33323	0.0003668	LOC108699634	5.22729	0.00127278	nkx1-2.L	5.46931	0.0048352	retn.1.S	6.59393	0.000270215	hoxb1.S	7.68518	8.34e-11
zfp36.S	3.32411	3.89e-07	LOC108698102	5.16636	0.0134886	kcnk9.L	5.45101	0.0309448	hes5.1.S	6.57991	3.19e-19	hoxb5.S	7.677	4.51e-07
rnf208.L	3.26209	0.0484934	LOC108703849	5.15527	0.00560453	foxh1.2.L	5.40807	5.90368e-29	Xelaev18002981m	6.55625	0.000261705	MGC52890	7.64006	4.14e-07
id3.S	3.23003	1.16e-22	tRNA-Lys	5.13955	0.0146299	Xelaev18000386m	5.38944	0.00232547	hes5.7.S	6.55546	6.18e-11	znf185.L	7.59963	3.01e-46
tspan18	3.21315	0.0286378	LOC108712697	5.13951	2.3e-15	sf1.L	5.38385	0.00369257	Xelaev18000067m	6.51297	0.000247368	cdx2.S	7.56662	8.41e-10
plekhf1.S	3.16295	0.000230916	dlx5.L	5.07676	5.87e-29	klf4.L	5.3836	3.28764e-40	atp12a	6.5129	1.13e-34	slc22a4.L	7.51095	2.56e-102
cdc25b.S	3.14887	5.3e-12	foxi1.S	4.99162	3.57e-15	cyp2ac1	5.33972	0.0021199	cr1b	6.50657	3.06e-42	xk81a1.S	7.49375	6.83e-42
dkk1.L	3.09541	0.000270462	adal.L	4.98902	3.65e-05	foxi1.S	5.32723	0.00306474	LOC108710788	6.43331	0.000241773	ankrd22.S	7.48635	7.83e-13
klf4	3.08236	0.00151277	dnah1.L	4.94571	6.63e-06	LOC108706751	5.32559	0.00196731	angpt4.2.L	6.43141	7.71e-05	wnt10a.L	7.34007	0.000216608
dis3l	3.03664	0.0493656	meis3.S	4.92496	3.92e-17	syn1	5.32006	0.000904404	LOC108701743	6.40434	1.63e-20	Xelaev18006086m	7.30242	1.79e-06
znf750.S	2.99851	5.84e-14	eci1.S	4.82131	0.000357318	neurog1.L	5.30424	0.00579546	atp13a-like.L	6.40048	2.26e-32	foxi1.S	7.29279	1.84e-05
acpp.S	2.993	0.000293363	klf17.L	4.80753	1.61e-63	ventx3.2.L	5.30061	9.07473e-16	Xelaev18029603m	6.38516	0.000308971	syt8.L	7.2425	1.52e-59
znf750.L	2.97764	2.19e-27	foxi1.L	4.75865	2.87e-14	fcgbp	5.27423	8.27694e-59	kctd15.L	6.32459	2.94e-36	wnt3a.L	7.18834	8.3e-07
LOC108704120	2.96461	0.0109701	cpt2.L	4.69225	0.0105919	LOC108698170	5.16148	0.00141249	loc100145533.S	6.31326	0.000217205	hes5.3.S	7.10122	8.39e-34
LOC108719516	2.93958	0.0192506	klhl29.S	4.6671	0.0026665	fam198b.L	5.14136	3.42121e-15	cxcl12.S	6.31139	5.32e-29	cstl1	7.06713	3.41e-06
LOC108699863	2.9095	9.78e-12	krt18	4.65683	0.000535625	ankrd27	5.12625	0.0129488	syt8.L	6.23845	5.06e-66	itln1.L	7.05356	2.4e-08
ccdc68.L	2.81591	0.0384301	Xelaev18004205m	4.56144	1.02e-05	eci1.S	5.1241	0.00209981	slc16a3	6.21625	9.13e-49	mcidas.L	7.03856	5.28e-18
ppp1r15a.L	2.80821	0.0174584	loc100487022.L	4.50333	0.0182225	msmb.3.L	5.1187	0.0211304	cmahp.L	6.20652	9.07e-06	prox1.S	7.02094	1.95e-07
ventx3.2.L	2.79116	0.0102379	LOC495139	4.50332	0.0389662	Xelaev18003144m	5.10391	0.0025113	slc22a4.L	6.18561	1.35e-71	loc100145533.S	7.00494	1.56e-10
pnliprp1	2.76804	0.0452697	dlc.L	4.48962	6.66e-05	col5a2.S	5.10361	1.81019e-05	dlc.L	6.16045	6.44e-55	klf2.L	7.00485	4.04e-09
sds.L	2.75942	0.00167265	dlk2.S	4.45983	6.33e-11	tRNA-Lys	5.08749	0.00266395	col26a1	6.04869	0.00715516	znf534.L	6.96991	2.03e-54
LOC100493194.L	2.75905	0.00276033	mrpl44.L	4.44842	0.00583255	cxorf21.L	5.08219	0.0132068	supt5h	6.02998	0.0001544	trpm5.L	6.92454	3.39e-50
slc16a3	2.71782	4.24e-07	skida1.L	4.43289	4.98e-10	copg2	5.06504	0.0147206	LOC108714180	6.02903	0.00101032	vill.S	6.92176	6.6e-47
cdc25b.L	2.70436	2.85e-07	znf750.S	4.40512	8.55e-87	foxi4.1.L	5.06371	2.9051e-15	plppr1.L	6.00776	0.0237945	post9p.L	6.89974	5.36e-37
dusp1.S	2.69754	1.37e-14	galr1	4.401	0.0381569	rep15.L	5.06009	0.00390003	slc12a1.L	6.00326	0.000195376	xmc.L	6.89834	2.42e-17
col18a1.L	2.6723	0.00499887	lypd6.L	4.35956	9.77e-07	bambi.L	5.05233	3.57163e-84	xk81a1.S	5.97438	8.02e-65	Xelaev18000499m	6.86233	3.58e-05
id3.L	2.64887	7.76e-15	grhl3.L	4.35247	6.49e-28	celf3.S	5.03691	0.000683307	znf185.L	5.96323	2.94e-27	atp12a.L	6.84844	5.17e-21
hes3.1.L	2.63355	0.000618264	klf4.L	4.34899	9.76e-58	hes5_X2.S	5.02829	0.00737202	syt13	5.90533	2.25e-18	pnlip	6.84414	0.000253228
LOC108713828	2.63096	0.0438512	LOC108714611	4.33515	0.000865254	tmem229b.L	5.01857	0.000966572	brs3.S	5.89065	0.0260508	figf.L	6.83896	1.02e-17
skida1.L	2.60951	0.00512334	ventx3.2.S	4.32506	0.00256837	wnt3a.L	4.99646	0.0150545	klf2.S	5.83402	2.81e-55	c14orf79.L	6.83521	4.54e-17
akr1c2.L	2.60061	0.0115134	mid1ip1.S	4.32086	8.06e-07	LOC108712849	4.99084	0.0105725	creb3l4.S	5.82902	2.13e-37	hes5_X2.S	6.78641	1.69e-16
nov.L	2.59303	0.0292427	neurog1.L	4.25713	0.0451054	cxcl12.S	4.99047	3.38458e-15	hes5.2.L	5.8172	5.67e-05	fam177b.L	6.77708	1.33e-49
msx2.L	2.57339	0.0116227	foxi4.1.L	4.24284	5.12e-11	post9p.L	4.96692	5.07197e-09	onecut1.2.S	5.80738	2.1e-25	tuba1a	6.76271	1.14e-20
sbk1.L	2.57081	1.29e-11	tnfrsf6b.L	4.21987	0.00268479	slc30a10.S	4.95337	4.23037e-14	post9p.L	5.80115	7.01e-22	tnf.S	6.76027	2.53e-05
gmnc.L	2.56931	0.0182253	kcng4.L	4.17874	0.0307443	Xelaev18043195m	4.9353	0.0353763	LOC100488577.L	5.79914	0.00941742	manea.L	6.73265	2.39e-05
Xelaev18041975m	2.56737	0.00046592	Xelaev18004319m	4.10483	0.0394366	olig2.S	4.93404	0.000392816	LOC108698170	5.7598	1.11e-08	gstt1	6.72923	0.00038315
Xelaev18004205m	2.54072	0.0257605	szl.L	4.02285	1.98e-14	foxi1.L	4.93075	0.000490358	foxh1.2.L	5.74487	3.46e-23	hoxa1.S	6.71161	7.89e-28
adamts1.L	2.53798	3.39e-16	tfap2a.S	4.0092	2.09e-32	syt8.L	4.92704	4.16184e-22	cdx2.L	5.74203	3.08e-30	hoxa1.L	6.71026	2.05e-14
tbx2.L	2.53322	0.0456395	znf750.L	3.98279	3.89e-45	cat.3.S	4.91756	0.0406161	vill.S	5.7338	7.7e-36	MGC75872.L	6.70822	3.49e-05
ccng1.L	2.52949	0.00828037	pnliprp1	3.9664	2.77e-05	LOC108717259	4.90487	5.11384e-13	arhgap25.L	5.70213	1.97e-05	hoxa3.S	6.6478	0.00010996
Xelaev18001309m	2.51751	9.63e-05	grik4.L	3.96288	0.0301352	hes3.3.L	4.87851	0.0245647	szl	5.66702	1.03e-37	LOC108701787	6.63611	3.08e-14
krt.L	2.50516	0.000344135	vsig8.L	3.95563	0.0027716	tbx3.S	4.86361	0.000207827	rflcii.L	5.65586	1.4e-06	bpgm.L	6.63002	1.57e-56
rps24	2.50011	0.0369133	pim1.S	3.9527	1.13e-18	myt1.L	4.8583	4.64988e-29	xak-b.L	5.63603	0.00725337	tmem45b.L	6.59837	5.83e-68
LOC108704302	2.49574	4.56e-11	fam83a.S	3.94017	0.0153622	dlx3.S	4.85053	1.19329e-63	prox1.S	5.59823	0.000108377	krt80.S	6.58506	7.39e-07
klf2.S	2.47613	7.95e-14	wfdc2.L	3.93581	3.34e-16	Xelaev18045499m	4.83268	9.44945e-13	fgf19.L	5.59635	0.0175177	LOC108697577	6.58493	2.32e-05
arl4c.S	2.46409	1.1e-07	slc40a1.S	3.91824	0.00444984	ano9.L	4.82366	1.30682e-27	wnt5b.S	5.59575	2.33e-33	hes9-1.L	6.57429	5.81e-29
plk2.L	2.40805	0.000517235	szl	3.91699	5.75e-13	slc16a3	4.81841	3.60683e-26	Xelaev18002015m	5.5815	0.006985	tuba1cl.2.L	6.51067	2.83e-16
ackr3.S	2.40569	1.84e-12	vgll4l.S	3.9142	1e-43	LOC108698406	4.75182	1.39367e-05	hes5_X1.L	5.57539	4.04e-18	xak-b.L	6.50347	0.000149683
adamts1.S	2.391	0.000477836	klf2.L	3.90366	1.46e-20	LOC108701787	4.68142	0.00198793	fam177b.L	5.56512	4.84e-40	vsig8.L	6.49108	4e-28
lpar6.S	2.36795	4.94e-08	ventx1.1.L	3.89022	5.78e-12	hoxa1.L	4.64629	0.0205801	zc3h12c.S	5.56226	7.58e-06	btc.S	6.46573	8.09e-31
foxd4l1.1.L	2.36727	0.000722173	samd12	3.88255	0.00636272	dlk2.S	4.63777	5.06576e-10	Xelaev18032572m	5.55339	8.97e-06	Xelaev18000067m	6.44095	8.53e-05
fos.S	2.32785	7.88e-27	ventx3.2.L	3.85809	0.0041898	krt5.7.S	4.59687	2.04261e-38	grhl1.S	5.54635	1.77e-120	Xelaev18000621m	6.41783	9.32e-10
asph	2.31948	0.00299988	krt12.S	3.84072	7.1e-19	gby.L	4.58824	0.00146327	kctd15.S	5.54568	1.07e-24	hoxa5.S	6.39995	0.000167705
ptger4.L	2.31395	0.00543087	LOC108716494	3.83028	0.0368451	ankrd22.S	4.58325	0.00115143	styk1.L	5.52955	0.00531028	krt.L	6.38524	5.83e-69
loc100487022.L	2.29862	0.0452174	slc16a3	3.79311	1.53e-27	gas2l1.L	4.57861	2.6481e-29	kcng4.L	5.5066	0.0119614	creb3l4.L	6.37468	1.07e-11
pim1.S	2.2971	1.01e-05	myt1.L	3.78825	5.23e-11	pik3r6.S	4.55891	0.0249459	pthlh.L	5.43872	0.0131957	kremen2.S	6.3433	6.65e-29
sfrp2.L	2.27552	4.62e-25	fam198b.L	3.7433	1.33e-12	tpm1	4.55623	0.0014933	wfdc2.L	5.41742	3.36e-23	hoxc6.S	6.32375	5.3e-12
bambi.L	2.26922	4.63e-05	klf2.S	3.74108	6.92e-57	id2.L	4.55536	1.09018e-58	szl.L	5.41592	5.03e-28	sult6b1.5.L	6.29569	2.26e-63
LOC108698216	2.2655	2.97e-06	syt8.L	3.71564	2.11e-06	st8sia6.L	4.55469	0.0475999	degs3.L	5.41186	1.15e-47	t.S	6.2832	8.91e-07
klf17.L	2.26492	0.00341381	alcam.S	3.69897	8.23e-10	cdx2.L	4.55331	1.10351e-16	hes9-1.S	5.41174	9.51e-21	krt5.7.S	6.27531	1.5e-73
ptch2.S	2.25861	0.0448544	ubp1.L	3.66383	0.00133307	zc3h12c.S	4.55194	3.98549e-07	LOC108719498	5.39117	0.000139989	degs3.L	6.27456	1.05e-47
LOC108717260	2.24572	0.0158796	lypd6.S	3.60865	0.00776142	LOC108718891	4.53771	0.0258322	foxi4.1.L	5.37646	1.72e-13	MGC52622	6.22932	2.32e-53
Xelaev18011072m	2.21232	0.0151321	cdc25b.L	3.60263	2.63e-73	stmn4.S	4.52852	0.00389822	xmc.L	5.37254	1.98e-10	tmem229b.L	6.22122	0.000498465
LOC108715703	2.19707	0.000128716	ttc22.L	3.567	0.0233468	hes9.1.S	4.50753	0.000989756	LOC100493076.L	5.36163	0.0137933	hoxa2.S	6.21612	0.000298775
timp3.S	2.19257	0.0336907	comt.2.S	3.56642	0.0137514	cr1b	4.4955	8.93187e-20	krt5.7.S	5.35838	7.26e-113	morc1	6.20185	0.000235202
ventx2.2.L	2.17747	0.00046592	LOC108706875	3.561	2.74e-05	tbx3.L	4.47434	5.12738e-07	LOC108701747	5.31432	0.0317307	cyp2ac1	6.20169	0.000131262
xepsin.L	2.16926	1.42e-12	cfp	3.55598	0.000450873	creb3l4.S	4.45004	5.22332e-18	morc1	5.31389	0.000633127	LOC108701745	6.19853	9.7e-07
ventx3.2.S	2.1628	0.00999566	tuba1a.L	3.55593	1.39e-10	casq1.S	4.44699	0.00778795	cstl1	5.29356	0.00332908	angpt4.2.L	6.1818	1.27e-05
kiaa1324l.S	2.13503	0.00931145	slc6a16.L	3.55572	4.91e-07	slc2a7.L	4.43688	0.0206366	LOC108701787	5.29256	3.13e-08	tfap2c.L	6.16804	1.13e-23
meis3.S	2.11425	0.00292762	fgfr4.L	3.5481	2e-31	ccn1l.S	4.43399	7.90642e-14	MGC68858	5.2917	8.5e-23	gdpd1.L	6.16734	8.65e-64
cdx1.S	2.11068	0.0127459	gipc1	3.54716	0.00204108	LOC108701743	4.40052	2.08468e-11	Xelaev18032363m	5.27507	0.0100275	loc100489456.L	6.09753	5.14e-05
vgll4l.S	2.10002	0.0032842	dmrt3.L	3.54557	0.00461299	abcc13.L	4.39604	0.00279989	lmo4.2.S	5.26103	6.16e-141	Xelaev18014760m	6.08285	0.00419094
ccnd1.S	2.09934	1.19e-05	vwc2l.2.L	3.53399	0.000295999	samd12	4.39597	1.21472e-07	dlx3.L	5.2584	4.43e-50	Xelaev18000618m	6.08259	0.0202644
olig2.L	2.09404	0.0103723	xepsin.L	3.52621	6.05e-19	krt12.L	4.38005	5.33168e-06	hs3st1.L	5.25048	1.87e-15	hoxb6.S	6.08239	2.06e-14
aaed1.S	2.08631	0.0462662	krt5.7.S	3.52204	1.13e-17	ikbkg.S	4.37925	3.3304e-07	eci1.S	5.22153	0.0299578	ag1.S	6.07571	1.65e-26
grwd1-b	2.08131	0.0175421	olfm4.L	3.51467	7.31e-09	LOC108706691	4.37262	0.0259503	hoxa1.L	5.2111	1.52e-05	t.L	6.07143	2.38e-34
dennd2c.L	2.05784	0.0125385	hes9-1.S	3.51104	0.000489007	dnah1.L	4.37148	0.0337639	elovl3.L	5.20823	1.96e-32	syt13	6.05714	7.79e-37
azin2.S	2.04152	1.02e-05	dlx6.L	3.50842	0.000848454	vill.S	4.36077	7.80468e-14	tnf.S	5.16809	0.00741948	acta2.S	6.05567	0.0211599
hes9-1.S	2.03777	0.00964439	ventx1.1.S	3.47267	1.25e-06	rhbdl3	4.34275	4.56198e-31	bpgm.L	5.1644	1.09e-87	kctd15.L	6.03834	1.2e-38
LOC108717642	2.03257	0.000110431	fkbp9.L	3.46744	0.0184219	rhou	4.33929	2.3088e-61	trpm5.L	5.15461	1.58e-32	fam83e.S	6.0304	0.000347763
dusp1.L	2.0308	5.67e-15	Xelaev18008189m	3.46565	1.14e-07	hoxa1.S	4.33606	0.0429724	rhbdl3	5.15383	9.61e-27	trim29.S	6.0167	5.23e-87
LOC108701168	2.02695	0.00720407	rack1	3.4498	0.00202133	fgb.L	4.33547	0.0126798	LOC108701745	5.14911	0.000399536	Xelaev18003144m	5.99971	0.000960252
yrdc	2.02185	7.61e-07	id2.L	3.43181	1.37e-16	gnb3.S	4.31713	2.64719e-17	fam83f.S	5.14443	1.22e-15	LOC108698170	5.98962	9.46e-11
htra1.S	2.02079	0.00282627	fsbp	3.42737	2.34e-06	fsbp	4.31341	2.06697e-14	gstt1	5.14355	0.000184957	LOC108714180	5.98221	0.00091881
krt5.7.S	2.00619	0.000921192	ablim3.S	3.40512	0.0225489	dlx6.S	4.30222	1.74843e-25	mcidas.L	5.12849	7.07e-13	mcidas	5.97771	2.31e-15
tfap2a.S	2.00578	0.00160644	foxf1.S	3.40295	0.035473	atp12a	4.29691	8.46088e-12	p2ry4	5.12519	2.23e-29	Xelaev18028374m	5.96963	0.00191911
camkv	2.00041	0.0247178	LOC108698170	3.40095	0.0074516	znf750.L	4.29273	7.0467e-47	foxj1.S	5.10435	5.41e-15	atp12a	5.95379	2.47e-20
zic3.L	1.99402	1.45e-11	msx1.S	3.37545	0.0190966	pnliprp1	4.2743	0.00487978	bspry.S	5.10031	0.00118389	tRNA-Lys	5.93335	0.000120346
fam198b.L	1.98794	0.0367079	fgfr4.S	3.35097	2.11e-29	adal.L	4.26481	9.24912e-06	nectin4	5.09897	9.36e-25	mef2c.S	5.93192	8.01e-06
LOC108705810	1.98747	0.00317856	tuba1a.S	3.34923	8.23e-10	rnf225	4.26367	2.40743e-17	s1pr5.S	5.09749	2.56e-19	hoxc9.S	5.92942	3.61e-05
klf4.L	1.98317	1.11e-05	LOC108706751	3.34814	0.00419911	col4a6	4.24941	0.0359267	ccn1l.S	5.09604	1.75e-18	fgf19.L	5.92235	0.0196039
foxd4l1.2.L	1.97626	0.000227751	LOC108714950	3.34123	1.21e-13	hes5_X2.L	4.24633	4.25232e-09	nmur1.S	5.06503	0.0126793	LOC108706691	5.90817	0.00299252
gprc5c.L	1.97119	0.000189137	htra1.S	3.31875	3.57e-27	lmo4.2.L	4.23736	7.76902e-59	LOC108699846	5.05655	4.57e-07	Xelaev18035022m	5.90287	0.00124083
hist1h4d.L	1.96654	0.012688	cmpk2.S	3.31256	0.0173456	fucolectin.S	4.23013	0.000119948	pvalb.S	5.03816	0.0154521	hs3st6.L	5.89428	0.000275297
stard13.L	1.92875	0.000490301	pvrl3.S	3.31054	8.14e-06	hes9-1.S	4.22148	2.04948e-05	stx19.S	5.03815	1.31e-43	cdx2.L	5.8905	5e-34
klf2.L	1.92704	4.27e-13	plk2.L	3.30629	1.26e-09	vgll4l.L	4.20489	1.13379e-15	gdpd1.L	5.03366	1.94e-36	mfsd6l.L	5.88806	1.04e-29
krt.S	1.91726	0.000724596	cr1b	3.29643	3.25e-18	myom3.L	4.20232	0.0247281	gnaz.S	5.02501	4.31e-05	MGC85058	5.88438	1.44e-81
esr-5.L	1.91595	0.00152352	gprc5c.L	3.28742	2.5e-36	lipc.S	4.19838	0.0191316	trim29.S	5.02131	1.15e-52	sytl5.L	5.88133	7.81e-25
rnf225	1.91528	0.000715106	MGC68858	3.28165	6.59e-05	slc22a4.L	4.19	2.22687e-50	tmem45b.L	5.01723	8.87e-49	prss23.S	5.87831	0.000332599
Xelaev18000483m	1.90559	0.00048152	esr10.S	3.27594	0.0124867	tfap2a.S	4.18139	6.13064e-29	gas2l1.L	5.01665	3.72e-43	foxj1.2.L	5.85449	6.42e-11
pcdh7.L	1.90056	0.0461815	msx2.S	3.25979	1.82e-05	degs3.L	4.17166	1.3218e-18	col5a2.S	5.01658	0.00245295	LOC108711838	5.85013	0.00830803
cyp26a1.L	1.89795	2.34e-07	epha3	3.24556	0.0261007	zc3h12c.L	4.16912	3.72246e-07	btc.L	4.99271	0.000152982	LOC108708706	5.85007	0.00778799
egr1.L	1.89411	0.00162175	trpm5.L	3.24347	2.64e-10	gprc5c.L	4.1652	3.51474e-37	tuba1a.S	4.99033	1.85e-24	Xelaev18037919m	5.82965	0.00386829
LOC108705106	1.89302	0.0390906	lmo4.2.S	3.21257	8.48e-09	pim1.S	4.13748	3.38944e-25	MGC85058	4.94601	8.3e-65	hoxb3.S	5.81665	1.82e-06
mxi1.L	1.88383	4.36e-06	rgcc.L	3.20862	6.24e-31	slc12a1.L	4.13631	0.00100082	hes9.1.S	4.94387	2.07e-15	hoxc4	5.80736	1.36e-05
ptch2.L	1.86969	0.00398993	degs3.L	3.20619	8.45e-07	Xelaev18028074m	4.12467	0.00998564	bmp8a	4.94149	0.0416485	grhl1.L	5.80643	1.53e-56
LOC108706483	1.86184	0.00148414	tgif2.S	3.19246	6.62e-25	hes5.9.S	4.10695	7.42362e-05	pdgfa.S	4.93847	1.95e-23	LOC108707290	5.80004	0.00236995
LOC108698217	1.85291	0.000563054	cdc25b.S	3.18495	1.33e-26	pik3r5.S	4.10556	0.00141251	tbx3.S	4.92993	6.51e-25	hoxc6.L	5.78701	0.000473363
LOC108711622	1.84426	5.37e-07	atp1b2.S	3.17274	3.47e-05	nectin4	4.10349	9.72413e-19	LOC100037903.1	4.92169	8.22e-07	wfdc2.L	5.76701	7.48e-36
LOC100191024	1.80325	1.13e-06	apela.S	3.17054	0.004445	cxcl12.L	4.07713	2.74202e-18	Xelaev18003144m	4.92112	0.00139119	hs3st1.L	5.75835	3.17e-05
poli.S	1.7986	0.00149919	ano9.L	3.16828	1.32e-08	ventx1.1.L	4.0576	6.89989e-29	ttc22.L	4.89964	1.04e-14	frem1.L	5.75803	1.46e-06
LOC108700281	1.79541	0.0010003	grin2b.L	3.16775	0.042724	bspry.S	4.04489	0.0377845	areg.S	4.89701	4.52e-10	hes5.1.S	5.75351	2.34e-13
mtx3.L	1.78659	0.0340306	cxcl12.L	3.14779	4.47e-18	dlx5.L	4.0419	5.29319e-21	fut1.S	4.89561	1.51e-40	cxcl12.S	5.75075	4.1e-12
upk3b.L	1.78059	0.0149712	tead4.L	3.13844	5.62e-19	gnb3.L	4.03485	1.23063e-31	gck.L	4.89309	6.69e-05	Xelaev18002160m	5.74823	0.00197044
prdm1.S	1.76344	0.0148431	fcgbp	3.13837	2.81e-10	zbtb7b	4.01947	1.81423e-05	kremen2.L	4.88338	2.36e-13	gpr12	5.74581	0.028095
rgcc.L	1.75746	1.64e-05	elavl3	3.12931	1.99e-09	bambi.S	4.01659	1.97645e-40	myt1.L	4.85384	8.12e-40	nek2.L	5.73932	5.64e-56
ins	1.75426	0.000201144	LOC108715890	3.12538	0.000128419	nrarp	4.00697	3.98913e-32	slc7a4.L	4.83711	1.46e-62	LOC108710788	5.73562	1.6e-05
LOC108699241	1.75421	0.00108793	grhl3.S	3.11871	3.11e-17	pdgfa.S	3.99733	1.87705e-08	muc15	4.83599	6.64e-17	vgll1.L	5.71555	1.39e-26
xarp.L	1.75326	0.00136782	bambi.L	3.11629	1.61e-13	klhl29.S	3.98854	0.00570027	tfap2c.L	4.83362	1.96e-40	rbbp8nl.S	5.71174	1.38e-25
tuba1a.S	1.73883	0.0203694	ikbkg.S	3.09718	0.000235126	klf2.L	3.98003	7.86199e-23	LOC100486385.S	4.82735	6.92e-33	pparg.S	5.70575	0.00422621
usp43.L	1.73571	0.0417787	foxh1.2.L	3.094	1.31e-29	angpt4.2.L	3.94756	0.0372009	hoxd1.L	4.82416	2.46e-14	pvrl4.S	5.69377	1.29e-32
xvent-2b	1.73221	9.12e-05	dlx6.S	3.07392	5.16e-12	hes5.5.L	3.93987	0.00032032	copg2	4.82409	0.0291927	b4galnt3.S	5.69358	1.55e-08
dlx5.S	1.72953	0.00157604	LOC100487499.S	3.06323	1.42e-11	hes3.S	3.93877	0.0171403	klf4.L	4.79582	5.09e-68	abcb1	5.67637	1.17e-22
abcb1	1.72923	0.0163191	gas2l1.L	3.05898	2.11e-20	Xelaev18011648m	3.93475	0.00343875	cpt2.L	4.78662	0.0133029	tnfsf10l.L	5.67624	3.04e-39
ccne2.L	1.7253	0.000861251	cxcl12.S	3.05078	5.2e-05	elovl3.L	3.93384	9.62093e-24	cxorf21.L	4.77164	0.0144437	lmcd1.L	5.6733	0.00465357
rasd1.L	1.72056	0.000629428	trim29.L	3.04937	5.02e-11	p2ry2.S	3.92262	7.87901e-11	klf4	4.76945	1.44e-10	atp8b3.L	5.66845	1.76e-34
fam83h.S	1.70234	0.0429292	Xelaev18036472m	3.01495	0.0272014	kctd15.S	3.90777	1.38048e-07	lhx5.S	4.76603	7.69e-25	cracr2a.L	5.647	0.00543977
ptgs2.S	1.69694	0.000333272	MGC68910	3.01429	1.67e-07	rflcii.L	3.90529	1.48313e-07	MGC52890	4.7592	0.0355588	cdx4.S	5.64639	1.39e-26
egr1.S	1.68538	0.000595853	LOC108704302	3.01154	2.48e-15	trim29.S	3.90408	4.34092e-23	cyb561	4.74397	0.0168861	LOC100486385.S	5.64292	9.74e-29
hal.1.L	1.68082	0.000227751	plaur	3.00464	0.0224259	stx19.S	3.89156	9.37056e-34	mcidas	4.7348	1.02e-06	kctd15.S	5.63046	3.33e-18
lhfpl2.L	1.67919	0.0125385	rnf225	3.00162	1.22e-10	cdx2.S	3.86066	9.70692e-06	tfap2c.S	4.73379	1.97e-103	prickle3.L	5.63044	1.4e-23
sepp1.L	1.6663	0.0439189	hpgd.S	3.00142	6.48e-08	rbp2.S	3.82673	0.005658	tnfrsf12a.L	4.73345	0.00795907	angpt4.L	5.61815	4.25e-10
anxa2.L	1.6642	0.0119476	foxi4.1.S	2.98796	4.04e-12	cpt2.L	3.80319	0.0101935	slc17a9.L	4.73069	1.14e-32	plpp3	5.60515	0.0153649
nynrin	1.65837	0.00929599	atp13a-like.L	2.97822	0.0212906	mid1ip1.S	3.80069	1.27168e-06	dlx2.S	4.71111	4.36e-22	Xetrov90003447m.S	5.58658	0.000641409
LOC108704510	1.65494	0.00178572	ventx1.2.L	2.96764	2.01e-07	LOC100486385.S	3.79564	2.16195e-18	Xelaev18000386m	4.70251	0.000396291	clec10a	5.56936	4.2e-05
fsbp-like.L	1.65422	0.00721516	iqsec3.S	2.9668	0.0016112	xk81a1.S	3.79555	3.3395e-19	tp63.S	4.68941	6.98e-08	ly6e	5.55727	9.82e-10
sox21.L	1.64677	0.0038843	prdm14.S	2.95912	0.000597952	foxi4.1.S	3.79357	2.06612e-14	sult6b1.5.L	4.68306	3.14e-39	ankrd33b	5.55266	0.0010354
fam46a.L	1.63929	0.0336907	nr1i3.L	2.95737	3.67e-06	rbm38.S	3.78379	1.7039e-23	rnf225	4.67939	1.35e-38	tfap2c.S	5.5449	1.55e-32
post3.S	1.63041	0.0439189	nrarp	2.94413	3.11e-16	wfdc2.L	3.78349	3.35743e-09	abcc13.L	4.67476	0.000647912	LOC100037903.1	5.5254	2.72e-12
cyp26a1.S	1.62268	0.000230916	plcd3.S	2.92635	0.00625491	Xelaev18004319m	3.76301	0.0404644	gnb3.L	4.67149	7.28e-138	foxj1.L	5.52344	1.47e-13
pim1.L	1.6099	0.00046592	rhou	2.92392	4.66e-17	sp7.S	3.75294	6.03023e-25	slc9a3r2.L	4.66895	2e-32	ca4	5.51467	0.000807439
hsp90aa1.1.L	1.60762	0.0311088	sema3f.S	2.92115	8.53e-14	vgll4l.S	3.73622	4.70841e-32	rab27a.S	4.6642	1.15e-13	tnni2.L	5.4985	3.59e-17
metrnl.L	1.60412	1.64e-05	loc100497492.L	2.92052	0.0144165	mrpl44.L	3.73416	0.000208921	cyp2ac1	4.65243	0.00064098	Xelaev18021046m	5.46972	0.0177224
rasd1.S	1.60279	0.000225547	slco5a1.S	2.9185	0.00137472	ventx1.1.S	3.72129	2.56522e-14	hoxa1.S	4.65066	0.0090961	hes5_X1.L	5.46852	5.21e-20
trpv6	1.57986	0.000201777	timp3.S	2.91083	0.000185854	c2.L	3.69777	0.048069	nek2.L	4.64193	1.77e-63	sparc.L	5.46823	1.38e-06
stx19.S	1.57839	0.00184812	stx19.S	2.90698	4.42e-19	fam83a.S	3.69704	2.23869e-08	Xelaev18028074m	4.63953	0.00404038	dse.S	5.46016	3.33e-20
klf5.L	1.57767	0.0129801	alg13.S	2.90124	0.00280773	pkp3.S	3.69603	2.21018e-33	foxi4.1.S	4.63923	1.92e-20	tat.S	5.45923	6.49e-12
muc5b	1.57405	0.000118153	dhrs3.L	2.8898	3.71e-06	ubp1.L	3.69254	3.18224e-06	c14orf79.L	4.63551	7.73e-17	LOC108705630	5.4512	0.00104738
snta1.S	1.57027	0.00214863	tbx3.S	2.88731	0.0424268	vsig8.L	3.6818	5.99244e-06	tbx3.L	4.63215	1.66e-18	s1pr5.L	5.44745	0.000188898
gprc5c.S	1.5689	7.88e-13	ccdc68.L	2.87854	1.2e-05	xmc.L	3.68084	5.42244e-05	Xelaev18023978m	4.62802	0.0419178	espnl.L	5.4313	0.00243094
maea.L	1.56649	0.0379063	arhgap36.L	2.87714	0.000851664	dlx5.S	3.66388	1.99881e-19	nrarp	4.6131	1.62e-124	s1pr5.S	5.42736	3.5e-06
c15orf39.S	1.56466	0.00460756	Xelaev18030798m	2.86734	0.00144835	LOC108698102	3.654	0.000223087	kremen2.S	4.60231	8.49e-13	eps8l1.L	5.41872	2.84e-21
hes6.1.L	1.56441	1.91e-06	plekhf1.S	2.86709	2.42e-07	LOC108714611	3.64136	0.000210665	arhgef37.L	4.60072	1.09e-05	LOC108714421	5.40956	0.00236217
hap1.S	1.56294	0.0497627	elovl3.L	2.86543	1.06e-06	rack1	3.64055	8.85807e-06	prss23	4.59688	1.45e-06	mmp11.L	5.3998	0.000334844
prdm14.S	1.5584	0.0227329	rgs4.L	2.85828	0.0478278	arhgap30.L	3.63954	0.0159543	tnfsf10l.L	4.59441	7.36e-69	foxj1.2.S	5.39427	3.1e-07
bmp4.S	1.552	0.00295004	LOC108715703	2.85698	3.53e-11	grhl1.S	3.63664	1.11898e-25	MGC52622	4.59327	1.23e-45	sidt1.L	5.39307	1.25e-12
myt1.L	1.54915	0.0403068	akr1c2.L	2.85626	0.00317887	LOC108701190	3.62174	1.31797e-05	LOC108715762	4.59293	2.02e-08	grhl1.S	5.39002	1.52e-42
irx1.S	1.54836	0.000563054	lmo4.2.L	2.81793	3.79e-07	LOC108699846	3.62033	0.0070053	gnb3.S	4.57805	1.43e-34	tuba1a.S	5.38687	0.000160616
dhrs3.S	1.54754	1.01e-05	lhx5.S	2.80877	4.5e-10	elavl3	3.61814	1.0906e-17	zbp1.L	4.56798	1.6e-06	hoxc5	5.37841	0.0189395
actn1.L	1.54219	0.0369539	trim29.S	2.80866	3.23e-12	esr10.S	3.58711	0.000518991	tnni2.L	4.55569	4.28e-21	Xelaev18000716m	5.37294	3.37e-10
fzd4.L	1.52685	0.00815619	dlx5.S	2.80293	2.44e-15	btc.L	3.5673	2.02077e-06	clec10a	4.55526	0.00602149	dlx2.L	5.3719	5.3e-12
lin28a.S	1.52174	0.033199	creb3l4.S	2.79989	2.38e-08	MGC68858	3.56139	3.28677e-08	grhl1.L	4.54195	1.92e-99	stmn4.S	5.36981	0.0230543
sfrp2.S	1.50985	0.000196191	cenpv.L	2.78882	5.26e-10	c15orf39.S	3.55689	2.40617e-48	eps8l1.L	4.50826	2.09e-24	dlx2.S	5.36803	1.55e-15
ube2e2	1.50746	0.0102379	sds.L	2.78452	5.05e-06	slc6a16.L	3.54788	1.28511e-07	socs1.L	4.50771	5.11e-10	Xelaev18035045m	5.36608	0.0118692
caprin2.S	1.50678	0.00520302	kiaa1324l.S	2.78096	6.31e-09	p2ry4	3.53556	1.4981e-21	ventx3.2.L	4.50513	1.13e-29	rpe65.S	5.36088	2.55e-52
timm17a.S	1.49687	0.00585211	irf1.L	2.77581	0.00219238	pvrl3.S	3.53514	3.69266e-11	adgrf1.L	4.50463	6.1e-09	loc100494072.S	5.34341	0.00167591
tfap2a.L	1.47101	0.0111535	gnb3.L	2.77485	5.78e-12	gnaz.S	3.52496	3.33341e-05	rep15.L	4.48202	0.00725417	znf185.S	5.34234	8.5e-21
ptgs2.L	1.45657	0.0199929	fcn2	2.77193	0.0014267	clcnkb	3.51895	2.6829e-15	mboat1.L	4.48191	4.28e-46	ugt8.S	5.33629	1.58e-16
parp9.L	1.45548	0.0192506	LOC108711622	2.75951	3.13e-14	mboat1.L	3.51796	2.21843e-18	krt.L	4.47081	5.1e-35	foxi4.1.S	5.33462	3.96e-15
gprc5cl1.L	1.45143	0.028808	LOC108716948	2.75669	0.0254702	trim29.L	3.51209	7.16696e-22	s100a10.S	4.45898	9.53e-13	gk.L	5.32327	3.64e-65
hes1.L	1.4381	0.00139303	cyp1a1.L	2.74486	0.000108193	trpm5.L	3.50008	3.70253e-19	gsg1.S	4.45628	0.0372134	c2orf50.L	5.30712	2.67e-05
gfod1	1.43483	0.0160223	rps24	2.72112	0.0102177	tp73.L	3.48946	0.000495183	Xelaev18029482m	4.43651	0.048968	parm1	5.28632	9.03e-26
zfp36l2.L	1.43192	0.0191551	qrfpr.L	2.71823	0.0117996	kcng4.L	3.48059	0.0142964	Xelaev18002160m	4.42253	0.035112	pde4a	5.28542	1.24e-12
Xelaev18003310m	1.41976	0.0175079	cnfn.1.L	2.7155	9.8e-07	Xelaev18040913m	3.45329	0.00024008	c2orf50.L	4.41531	0.0138003	styk1.L	5.27664	0.000278203
efna1.S	1.41829	0.000171334	ccne2.S	2.69342	2.89e-13	ptger4.S	3.4523	3.11639e-23	gcna	4.41434	3.53e-07	ahnak	5.23936	6.79e-21
gpt2.S	1.41531	0.000107546	p2ry4	2.69331	5.96e-08	amotl1.L	3.45111	9.98403e-16	sox3.L	4.41192	1.52e-17	Xelaev18003660m	5.22202	0.00354222
LOC108718087	1.4121	0.000150577	Xelaev18046781m	2.68839	0.0392662	fam3b.L	3.43369	1.82227e-40	ptgs2.S	4.40185	3.31e-57	hoxa10.S	5.22093	1.21e-05
plpp3.S	1.40387	0.0267647	krt.S	2.68778	6.97e-12	msx2.S	3.43165	1.86166e-15	hes5.9.S	4.38047	1.04e-14	msmb.3.L	5.21451	0.0252995
LOC108697345	1.39163	0.0152134	atp12a	2.67974	3.92e-17	lrrn1.L	3.42874	1.11387e-27	fam198b.L	4.37706	1.98e-10	ptafr.L	5.21177	6.03e-40
snrpa1.L	1.39162	0.0110223	LOC108709387	2.67763	0.0312917	LOC108718648	3.42295	8.95437e-29	LOC108718648	4.36238	4.61e-67	prickle3	5.21088	6.21e-14
gas2l1.L	1.38558	0.0283165	chrna2.S	2.67192	0.00227883	LOC100496293.L	3.41824	1.21493e-10	lrrn1.L	4.35531	1.66e-49	cav3	5.21034	0.0134208
paaf1.S	1.38049	0.000563054	LOC108701743	2.66861	0.00148218	LOC108703849	3.41719	0.0393278	hes5.5.L	4.34834	2.14e-11	fam83f.S	5.20316	4.51e-18
LOC108718445	1.37786	0.00636415	irx2.L	2.65853	0.00017436	LOC108706666	3.4058	0.0459016	parm1	4.31611	1.41e-08	elf3.S	5.19851	1.28e-06
sbk1l.S	1.36622	0.0125385	impg2	2.65762	0.0495834	hes5.7.S	3.39569	0.00504822	ventx3.2.S	4.3083	4.35e-19	fam83e.L	5.19272	0.00710176
scrn3.L	1.36286	0.000690578	LOC108701190	2.65644	1.61e-05	MGC68910	3.39467	8.58247e-09	LOC108717439	4.2951	9.77e-16	vtcn1.L	5.19149	3.44e-41
snn.S	1.36206	0.000337246	serpinh1.S	2.65638	0.000106954	LOC108715703	3.38549	4.84318e-16	evpl.L	4.29076	5.5e-06	p2ry4	5.17856	3.3e-53
pou5f3.2.S	1.36163	0.0314667	lhx5.L	2.6447	1.22e-10	stat1.S	3.36042	0.0112279	degs3.S	4.28931	4.28e-18	LOC108699846	5.17408	1.26e-12
mansc1.S	1.35001	0.00346282	id3.S	2.631	1.49e-18	arhgef40.L	3.35484	0.000404175	hes5_X2.L	4.2859	2.65e-21	arhgap30.L	5.16713	0.000401076
lhx5.S	1.34751	0.0109752	tead4.S	2.61688	2.84e-14	eps8l1.L	3.3546	2.13072e-09	syt1	4.26289	4.75e-08	ptk2b.S	5.16708	2.73e-20
irx2.L	1.34388	0.0212792	btc.L	2.61213	0.00483357	slc2a12.L	3.35209	0.039669	amotl1.L	4.26254	4.07e-39	nectin4	5.15157	4.88e-18
LOC108700085	1.34375	0.00841975	wasf3	2.60796	4.38e-05	LOC108699634	3.35146	0.0124962	slc2a12.L	4.25557	9.2e-06	Xelaev18004202m	5.1457	0.0448997
loc108703073.S	1.34066	0.044001	zfp36.S	2.60224	4.37e-14	c14orf79.L	3.349	1.63189e-09	arhgap30.L	4.2505	0.00144693	slc35a3.1.L	5.14201	1.68e-22
rps12.L	1.33489	5.38e-05	dlx3.S	2.57955	1.88e-06	s1pr5.S	3.34496	3.7578e-09	klf17.L	4.24336	5.39e-52	muc15	5.13813	6.2e-18
atp6v1d.L	1.32592	0.029893	gnb3.S	2.57916	0.00588183	dlx6.L	3.33634	7.2077e-05	dync1i1	4.23837	0.00142307	sostdc1.L	5.12344	2.06e-07
tmpo	1.3241	0.0128654	tll1-like.1.L	2.57436	0.000761404	hoxd1.S	3.30225	0.0156912	abcb1	4.22476	4.88e-16	LOC108712611	5.11096	0.00679961
grhl3.L	1.32137	0.00611845	lhfpl2.L	2.566	5.6e-09	tmem125.S	3.28849	0.0391148	vtcn1.L	4.2156	1.34e-17	hoxb2.S	5.10529	0.0040905
loc108648340.L	1.31948	0.0335836	trim68	2.56381	0.0126416	LOC108712697	3.28581	5.87098e-09	LOC108705880	4.20943	1.7e-07	Xelaev18040913m	5.10129	3.21e-09
mcl1.L	1.31575	5.13e-06	clic3.L	2.56125	1.84e-05	plaur	3.28304	2.0305e-08	rgl1	4.19633	1.44e-11	gbx2.2.L	5.10106	1.16e-09
rabgap1l.L	1.31559	0.0010322	ins	2.55488	8.71e-11	pnck.S	3.28251	7.427e-09	nr6a1.L	4.19286	4.57e-22	LOC108697223	5.09363	1.8e-06
lmo4.2.S	1.3125	0.0218133	dennd2c.L	2.55302	1.72e-10	Xelaev18007423m	3.27993	0.0306111	bspry.L	4.18739	3.06e-19	bmerb1	5.079	1.13e-06
mocos	1.31249	0.0287586	mboat1.L	2.55042	2.04e-05	gcna	3.2791	4.93096e-05	tmem213.L	4.17368	3.62e-06	LOC108701741	5.07462	7.19e-05
grhl3.S	1.29775	0.00746805	tfap2a.L	2.5438	6.04e-14	tfap2c.L	3.27814	1.10746e-09	mep1a.L	4.16065	0.0499052	cldn1.S	5.07326	0.044386
zic1.L	1.29675	0.0209257	cdknx.L	2.54163	4.59e-15	foxi4.2.S	3.26855	4.88534e-11	msmb.3.L	4.1599	0.0279219	Xetrov90017200m.1	5.06649	0.0447108
lfng.L	1.29651	0.0394311	sox3.L	2.53454	8.3e-14	usp43.L	3.2646	3.00089e-12	atp6v0a4.L	4.15821	0.0013219	rasal1.L	5.06369	1.53e-09
rhov.L	1.28795	0.000843169	degs3.S	2.52482	0.0146534	myt1.S	3.25964	3.66731e-13	asl.L	4.13629	6.37e-28	hes5_X2.L	5.06078	4.23e-31
fos.L	1.28713	0.00460756	kcna3.S	2.52118	0.0168744	cfp	3.25353	1.72812e-07	nipal1.L	4.12445	0.000201773	slc30a10.S	5.04915	9.49e-32
nagk.L	1.28634	0.0216509	lmod1.S	2.51964	0.000983607	grik4.L	3.25283	0.000614175	b4galnt3.L	4.10975	1.54e-21	hoxa10.L	5.04718	9.29e-10
Xelaev18024458m	1.27391	0.0409933	fsbp-like.L	2.51789	7.14e-17	myc.L	3.24265	8.957e-14	rpe65.S	4.0969	3.1e-32	spdef.S	5.0446	8.73e-08
LOC108705992	1.26729	0.000286618	sfrp2.S	2.51566	4.09e-12	tnfsf10l.L	3.2408	2.20059e-27	stard13.L	4.08107	8.15e-18	eci1.S	5.04038	0.0334204
ppt1.S	1.26103	0.0352475	sp7.S	2.51048	1.11e-07	snx22.L	3.23287	1.46781e-15	atp12a.L	4.07629	1.23e-06	arhgef37.L	5.03443	3.43e-06
ackr3.L	1.2563	0.0300916	xarp.L	2.50767	2.99e-05	lhx5.S	3.23123	2.80687e-11	fzd6.L	4.06931	4.38e-16	LOC108720070	5.03309	0.00874776
cldn6.S	1.2562	0.0136157	mid1l2.L	2.50719	0.017749	krt.S	3.22436	6.2994e-14	LOC108695467	4.0583	0.0157928	slc43a2	5.01908	0.0328622
rpl23.S	1.24756	0.00317683	muc5b	2.49558	2.18e-24	proca1	3.21518	0.00412007	slc35a3.1.L	4.05752	3.88e-05	slc7a4.L	5.01884	1.55e-42
krt5.7.L	1.24029	0.00735556	sema3f.L	2.47985	8.66e-15	nr1i3.S	3.21402	2.44933e-10	fam3b.L	4.05046	2.48e-62	Xelaev18002981m	5.01695	0.000482246
ventx2.1.L	1.23954	0.049919	cd99l2.L	2.47816	5.87e-11	LOC108709417	3.21375	0.0180234	kiaa1324l.S	4.04821	6.5e-38	fcn2	5.01473	1.64e-23
ier2.S	1.23836	0.01077	MGC82544	2.47381	3.96e-05	htra1.S	3.20119	1.61758e-18	LOC100496293.L	4.02994	4.39e-12	fut1.S	5.01175	3.91e-17
sowahc.L	1.2269	0.00221716	s1pr5.S	2.45785	8.49e-06	kctd15.L	3.19945	4.50236e-14	Xelaev18041737m	4.02788	5.07e-06	asl.L	5.0103	1.56e-34
sox3.L	1.22211	0.0111863	mxi1.L	2.45672	2.96e-21	elf1.L	3.19342	5.07852e-50	esr10.S	4.02162	3.53e-13	gjb3l.L	5.00396	0.00479727
akap2.L	1.21771	0.0111863	slc22a4.L	2.45381	2.44e-07	atp13a-like.L	3.18509	0.000129334	MGC80993	4.01234	1.09e-24	copg2	4.99983	0.0310739
cxcl12.L	1.21589	0.0498061	gprc5b.L	2.4505	0.000745307	trpv6.L	3.1778	9.16651e-13	c15orf39.S	3.99837	1.06e-62	hoxc8.S	4.99744	6.49e-08
drosha.L	1.20898	0.0206309	ptger4.S	2.44661	8.6e-09	kiaa1324l.S	3.17125	1.71635e-15	Xelaev18036730m	3.98251	2.48e-05	LOC108717439	4.99425	0.000474155
tp53inp1.L	1.20504	0.0225592	fblim1.L	2.44375	0.000236798	wnt5b.S	3.16478	8.30725e-12	dlx6.S	3.97573	2.38e-31	hspa5	4.99389	3.32e-26
lhx5.L	1.2028	0.00477391	xicl	2.43175	4.93e-16	rbm47.S	3.15689	1.59165e-22	mid1ip1.S	3.9604	1.02e-10	tpm1	4.99186	9.17e-05
mettl21a.S	1.19276	0.000134386	mdk.S	2.42198	2.86e-07	ttc22.L	3.14741	0.00163707	elf1.L	3.95993	8.27e-36	LOC100486385.L	4.98201	8.21e-20
elp6.L	1.19105	0.0257605	acpp.S	2.42194	0.00556015	hes5.1.S	3.13919	0.000152064	hoxd1.S	3.95938	1.43e-11	MGC68858	4.97998	2.74e-19
foxh1.2.L	1.18844	0.0116589	tmem265.L	2.41999	2.9e-07	MGC85509	3.12707	0.0379993	rbbp8nl.S	3.95476	4.69e-09	sf1	4.97297	0.00505264
hlf.S	1.17713	0.0218536	snx22.L	2.41867	3.72e-06	slc17a9.L	3.11934	1.27035e-24	pkp3.S	3.95444	4.22e-35	gcm1.S	4.96254	2e-06
neurl1b.L	1.16952	0.0347457	LOC108704120	2.41853	0.032311	fam83f.S	3.10248	0.0011825	itln1.L	3.95246	3.92e-11	hes8.L	4.95918	6.4e-13
metrnl.S	1.1695	0.000869674	ifitm1.L	2.40973	0.0222278	kremen2.S	3.09504	2.30559e-05	glb1l2.S	3.94761	3.06e-09	lrat	4.94773	0.00779362
epha2.L	1.16644	0.00495824	tnn.L	2.39441	0.0213192	tuba1a.S	3.09482	1.87625e-08	gadd45b.L	3.92847	4.69e-07	degs3.S	4.94588	1.67e-26
nme2.L	1.15446	0.0186099	LOC108708225	2.39126	0.0135181	gprc5b.S	3.08035	3.16772e-05	tdgf1.3.L	3.91054	4.44e-43	hes5.7.S	4.9401	1.4e-16
tlr2	1.14136	0.000749737	bambi.S	2.36808	2.38e-14	t.L	3.0634	0.0187958	esrrg.S	3.90547	3.86e-06	lrat.L	4.93762	0.0308891
alcam.L	1.12483	0.000765654	LOC108698216	2.36242	9.78e-06	tead4.S	3.0567	8.84883e-29	fat2	3.89726	3.01e-05	prss23	4.93599	2.78e-05
LOC108708488	1.12383	0.0320674	rasd1.S	2.35985	2.77e-08	syt13	3.04961	0.00482465	samd12	3.89605	2.12e-08	hes9-1.S	4.93511	4.11e-30
tgif2.S	1.12096	2.9e-05	rab11fip4l.L	2.35553	4.65e-21	nr6a1.L	3.04902	1.26938e-08	rab11b.2.L	3.88429	0.0105825	hoxc4.L	4.93462	2.06e-06
sox2.L	1.1025	0.00885672	fam3b.L	2.34696	1.9e-10	eppk1.L	3.04318	7.48517e-39	rack1	3.86931	8.31e-06	cr1b	4.92875	7.53e-23
ccdc25.S	1.10129	0.0199929	rflcii.L	2.34579	0.0255441	slc7a4.L	3.04195	1.79765e-51	krt.S	3.85807	5.88e-31	LOC108700694	4.92206	0.0490125
hist2h3c.L	1.09893	0.0235692	LOC108713828	2.32603	0.000448556	dlx2.S	3.03829	1.27014e-07	tmem56.2.L	3.85295	0.000258007	LOC108710651	4.90293	0.0344517
nrarp.S	1.09885	0.0145321	azin2.S	2.32469	1.01e-07	esr-5.S	3.03478	0.00015537	mrpl44.L	3.84751	0.00084344	esrrg.S	4.89107	7.91e-09
donson.L	1.0971	0.00573361	LOC100496293.L	2.32311	0.000112204	vasn.S	3.03175	0.00121909	elavl3	3.8353	8.31e-27	elovl3.L	4.88664	6.61e-67
mdh1.S	1.09252	0.02225	tfap2c.L	2.32224	4.09e-05	fam177b.L	3.02865	2.33348e-10	manea.L	3.83033	0.00259653	LOC108700914	4.87451	0.0332684
Xelaev18041793m	1.07698	0.00138738	Xelaev18011395m	2.32206	0.00490678	gfod1	3.0246	2.08342e-22	slc6a16.L	3.82649	1.1e-05	aim1.S	4.85924	2.23e-33
sox15.L	1.07405	0.00716617	gprc5b.S	2.3207	0.0165651	slc9a3r2.L	3.0241	5.46976e-13	rbm38.S	3.82025	9.67e-34	rack1	4.84014	1.2e-10
fth1.S	1.07098	0.0452697	LOC108698217	2.3188	1.84e-05	MGC52622	3.01905	2.42788e-22	LOC108706691	3.81453	0.00224837	evpl.L	4.83838	2.73e-18
bop1.S	1.06901	0.0043235	LOC108702688	2.31292	0.0232175	anks6	3.01867	0.00274115	Xelaev18003251m	3.81019	0.013198	hoxb8	4.83024	4.99e-09
htatip2.L	1.0658	0.0185129	nif.L	2.30873	0.0306916	tfap2a.L	3.01671	8.13207e-16	pdgfa.L	3.80621	1.85e-22	arhgef37.S	4.81814	2.1e-11
pam16.S	1.06077	0.0185284	g0s2.L	2.30735	0.000897837	manea.L	3.0164	0.00856916	gcnt4	3.80392	1.47e-10	fat2	4.8097	5.38e-06
dctn3.S	1.05801	0.040415	nrarp.S	2.29243	1.03e-09	ripply3.L	3.00532	0.0013489	LOC108705630	3.79752	0.00932374	ccdc136	4.7888	7.58e-05
dtx3l-like.L	1.05286	0.0164341	nr1i3.S	2.28151	0.0023778	arid3a	3.00026	7.83237e-05	LOC108713038	3.79687	0.0419083	slc35d2.S	4.78871	2.53e-12
fgfr4.S	1.05252	0.0483492	vasn.S	2.28149	0.031985	bspry.L	2.99717	3.12615e-10	ptger4.S	3.79517	1.24e-42	tuba1cl.1.L	4.78097	4.71e-05
LOC108697862	1.04654	0.00235367	pros1.S	2.27296	0.00631972	fzd6.L	2.99642	5.58292e-09	ifnlr1	3.79325	2.33e-07	gdf3.S	4.77884	6.46e-13
tuba3c.S	1.04416	0.00555996	cyp26a1.L	2.27122	4.55e-08	gdpd1.L	2.98644	9.26014e-08	tat.S	3.79224	4.84e-15	tmcc3.L	4.77384	1.73e-23
rps3.L	1.04358	0.021338	LOC108695829	2.26821	0.0022932	atp1b2.S	2.96117	2.46932e-06	wnt8a.S	3.78937	1.64e-16	fgb.L	4.77256	0.0147465
rarg.S	1.04192	0.0225082	gfod1	2.2654	2.36e-12	muc5b	2.96076	3.01044e-36	LOC108698173	3.78153	0.00211331	mansc1.S	4.7657	1.8e-28
socs3.L	1.04131	0.036901	tll1.S	2.25594	0.0114784	dlx3.L	2.95663	1.13385e-14	znf750.L	3.77322	3.94e-38	tbc1d24.2.S	4.75652	4.47e-12
post10.L	1.04038	0.0403068	LOC108706483	2.2503	0.0179538	asl.L	2.95644	2.25726e-13	t.L	3.7718	4.72e-05	LOC100493076.L	4.75216	0.00144861
cldn4.S	1.02844	0.0043235	mmp19.L	2.24906	0.012826	plcxd2.S	2.95594	0.0054577	ifnlr1.L	3.76976	9.39e-08	slc35c1.L	4.74536	3.32e-31
rhov.S	1.02722	0.00460756	hap1.S	2.24486	1.11e-07	ptmap4	2.95445	0.0108048	c17orf97	3.74253	5.03e-13	dlx3.L	4.72792	1.25e-23
hexim1.L	1.02668	0.00215838	asph	2.23528	0.00682499	tuba1a.L	2.95218	1.62116e-09	fam83c.L	3.74122	4.36e-22	rnf43.L	4.72424	3.66e-13
apoo.L	1.02584	0.0493055	fat2	2.22995	0.00557506	nek2.L	2.94342	4.90199e-19	gk.L	3.73659	8.75e-21	LOC108718065	4.71442	9.41e-25
ccdc43.S	1.01956	0.0234113	pkn1.L	2.22416	1.36e-07	anxa4.S	2.94193	0.000168892	bmerb1	3.73284	0.0005562	kitlg	4.71004	0.000297858
rpsa.S	1.00573	0.0121321	arl4c.S	2.22357	9.39e-12	evpl.L	2.92794	2.83515e-08	ankdd1b.S	3.72672	0.00026039	spata1	4.70299	7.6e-06
c17orf49.S	0.993539	0.0119476	LOC108718667	2.21931	0.000374045	Xelaev18036472m	2.92691	0.01255	MGC68910	3.72606	1.19e-08	xhoxc8	4.7029	1.41e-06
cdknx.L	0.992687	0.0139648	loc108718659.S	2.21704	0.00167559	rbm47.L	2.92596	1.71166e-14	anxa4.S	3.72119	2.21e-06	stpg4	4.70192	0.00137983
rps2.L	0.985335	0.00869849	camkv	2.21338	0.00034115	mmp19.L	2.92162	2.03737e-09	ptgs2.L	3.71734	3.52e-36	zbtb7b	4.69917	6.9e-09
mrpl9.L	0.981962	0.0103738	ccn1l.S	2.21332	0.0290535	elf1.S	2.92027	6.67716e-25	mmp19.L	3.7161	4.67e-08	stx19.S	4.69666	1.92e-17
trpm7.S	0.981033	0.0448504	parp3.L	2.20796	0.00417385	sowahb.S	2.91995	5.00396e-11	slc9a3r2.S	3.7119	4.56e-12	hes9.1.S	4.69273	8e-18
fut1.S	0.978543	0.00107236	mansc1.S	2.20725	1.17e-08	Xelaev18008189m	2.90657	2.2911e-06	snx22.L	3.70581	6.13e-17	bmp7.2.L	4.6895	1.38e-57
med9.L	0.975775	0.0102379	LOC108717642	2.20716	1.03e-08	smad9.S	2.90423	5.15285e-05	clic3.L	3.70306	1.61e-17	LOC108705880	4.6869	6.06e-11
anp32a.L	0.96934	0.000541564	pcdh7.L	2.20451	0.00177454	dmrt3.L	2.90397	0.0190176	angpt4.L	3.70113	8.33e-05	b4galnt3.L	4.68553	1.67e-41
cox4i2.S	0.966194	0.00132966	cdh1.S	2.19123	1.24e-11	Xelaev18040914m	2.89815	2.49522e-05	t.S	3.69286	9.04e-05	LOC108698798	4.68326	2.6e-08
cwc25.S	0.964929	2.1e-05	gprc5cl1.L	2.18839	1.75e-13	Xelaev18042539m	2.89302	0.0481598	foxq1.L	3.69277	0.0149116	rep15.L	4.68252	0.00014069
harbi1.L	0.964583	0.000861251	march8.S	2.1874	3.39e-05	LOC108706801	2.88121	0.00260589	prickle3.L	3.68699	1.05e-10	ifnlr1	4.68125	7.88e-11
supt7l.L	0.957881	0.0150729	gprc5c.S	2.17612	5.68e-17	xepsin.L	2.87617	2.90179e-08	znf534.L	3.68242	1.11e-12	hes5.9.S	4.65784	1.01e-16
rpl7a.S	0.956287	0.00287916	rhebl1.L	2.17329	6.79e-16	tmem72.L	2.8668	0.00325039	tfap2a.S	3.67725	2.45e-25	misp3.S	4.65569	0.00161838
mri1.L	0.951686	0.000280808	Xelaev18001309m	2.17243	5.55e-06	s100a10.S	2.85436	0.000151422	LOC100486385.L	3.67422	1.95e-23	cald1	4.64516	5.18e-11
rhob.L	0.950354	0.00853851	slc2a2.L	2.17242	3.63e-14	fam83c.L	2.84394	5.14104e-09	fgf3.S	3.67279	9.85e-18	rbp2.S	4.63939	0.0239233
ldhb.S	0.945853	0.0159989	hes3.1.S	2.16295	9.43e-07	LOC108715890	2.84288	0.00219159	slc35c1.L	3.66871	2.29e-50	cdx1.S	4.63478	3.54e-17
rpl7a.L	0.942988	0.0342249	nectin4	2.14836	1.76e-06	sema3f.S	2.84115	7.5312e-14	irf5.S	3.66674	2.2e-09	ptgs2.S	4.63207	3.25e-105
Xelaev18038135m	0.935411	0.0208544	bhmt.L	2.1481	0.00461309	mansc1.S	2.84098	5.99056e-19	tpm1	3.66557	0.00535052	fut1.L	4.62766	9.55e-20
abo.3.L	0.922574	0.049666	LOC108697345	2.13421	0.00553723	bpgm.L	2.83521	1.07379e-18	rasl10a.L	3.66008	0.0176344	thbs2.L	4.62549	9.21e-09
mst1r.L	0.909574	0.046363	dhh.S	2.12882	0.00536643	Xelaev18041737m	2.83349	0.000224166	ptafr.L	3.65685	6.84e-49	syt1	4.60273	2.7e-45
sqrdl.S	0.907622	0.0112208	c15orf39.S	2.11557	2.05e-22	krt18	2.81578	7.97577e-05	foxj1.L	3.65356	1.58e-08	Xelaev18038969m	4.59892	4.57e-39
atp6v1d.S	0.895364	0.00954288	LOC100493194.L	2.10549	0.0254949	klf11.S	2.81435	2.84048e-12	bambi.L	3.63855	7.12e-81	loc100145045.L	4.59883	0.0145202
padi2.S	0.892528	0.0445668	post5.S	2.10497	2.89e-05	mrps35.S	2.80844	0.00306885	atp8b3.L	3.63825	3.52e-26	Xelaev18040914m	4.58882	1.44e-10
stk25.S	0.890623	0.0110138	tmem163.S	2.10484	0.000235999	olfm4.L	2.79644	7.77367e-06	cenpv.L	3.6382	7.6e-14	Xelaev18009648m	4.58553	0.0181149
srsf7.S	0.880642	0.00295789	rgma.S	2.10421	4.84e-15	LOC108709394	2.79274	0.00550475	trim29.L	3.62459	1.09e-34	fam83c.L	4.58473	2.96e-22
rps3.S	0.87487	0.00287916	rhbdl3	2.10153	0.000264973	hes5_X1.L	2.79118	0.0148929	pnck.S	3.62149	1.11e-07	LOC108715935	4.584	0.00470155
btbd10.S	0.866336	0.0111863	pdk4.S	2.10013	7.77e-19	prickle3.L	2.78421	4.75446e-05	pim1.S	3.61739	2.79e-62	foxi4.1.L	4.58119	0.0207535
MGC131302	0.86253	0.0224555	vangl1.L	2.09987	0.0016112	msx1.L	2.78041	7.30931e-13	LOC108699634	3.61371	0.00943123	LOC108711255	4.57349	0.015338
42sp50.L	0.86188	0.0267647	plekhs1	2.09984	0.00991027	cenpv.L	2.77764	1.10122e-08	fsd1l.L	3.60846	2.97e-13	mmp3.L	4.57024	0.021237
nsfl1c.S	0.858821	0.0226101	pim1.L	2.09961	1.08e-06	Xelaev18005230m	2.7741	1.11186e-13	LOC108698063	3.60259	3.58e-13	ptprh.L	4.56345	1.3e-06
rrp1b.S	0.857681	0.00859709	LOC108716050	2.09336	0.00233189	tdgf1.3.L	2.77104	5.24611e-24	znf185.S	3.59962	3.33e-15	arhgap25.L	4.56056	0.0107205
fgfr4.L	0.857028	0.0227329	mrpl3.L	2.09308	0.0124826	LOC108716050	2.76692	0.00027933	lhx5.L	3.59343	1.18e-18	hes5.1.L	4.55268	2.01e-15
arsh.L	0.855485	0.0485567	LOC108708780	2.08856	0.0135739	rab6b.L	2.76677	0.0144005	LOC108714685	3.59279	2.24e-07	sostdc1-b	4.54608	0.000225375
rplp2.L	0.855106	0.0379456	LOC100497556.L	2.07434	2.42e-05	LOC108698139	2.76582	0.000252968	xbp1.S	3.58385	1.15e-73	pdgfa.S	4.54387	1.38e-08
tpi1.L	0.852173	0.0493662	Xelaev18011072m	2.0743	0.0194552	LOC108715762	2.76335	0.000514845	ctbs	3.58269	0.0280467	slc22a5.L	4.52531	9.11e-32
gfm2.L	0.851404	0.02029	slc16a12.S	2.07355	6.2e-05	lhx5.L	2.7632	4.07104e-10	sostdc1.L	3.57939	0.00157412	Xelaev18026687m	4.52218	1.34e-06
pcdh19	0.824349	0.0267002	bspry.L	2.06966	0.000315341	krt.L	2.76181	3.41079e-08	lipc.S	3.57771	0.0143657	rab25.L	4.51843	2.25e-44
gtf3c6.L	0.813917	0.000100447	usp43.L	2.06509	1.22e-10	pvrl4.S	2.75776	2.34096e-05	esrp1.L	3.57529	3e-40	hes6.1.L	4.50837	1.22e-31
sra1.L	0.811864	0.00775903	LOC108700281	2.04943	5.81e-23	areg.S	2.75313	0.00306474	dlx5.S	3.57476	1.64e-31	Xetrov90015513m.S	4.50504	0.0435225
psmd13.S	0.802696	0.0159944	ccne2.L	2.04326	5.87e-11	tll1.S	2.74705	7.30278e-05	rab25.L	3.56919	3.46e-23	MGC85509	4.50473	0.0227584
rnf222.S	0.80082	0.0326748	pdgfb.L	2.03509	6.22e-06	kcna7.S	2.74555	0.00817693	id2.L	3.56889	2.14e-44	Xelaev18004144m	4.49996	0.000406129
map3k8.L	0.799247	0.0341565	cyb5r2.L	2.03436	0.002044	styk1	2.74541	1.28841e-08	mansc1.S	3.56467	4.93e-33	kremen2.L	4.49397	1.62e-26
prdm9.L	0.796774	0.0043235	pidd1.L	2.03269	0.00304949	fut1.S	2.74472	2.19955e-13	LOC108699205	3.54547	0.000474174	sh3bgrl2.S	4.49064	8.96e-07
gnb2l1	0.792106	0.00634267	myt1.S	2.03216	9.92e-07	rergl	2.7367	0.00145291	eppk1.L	3.53695	4.54e-29	LOC108715762	4.48226	1.26e-10
gtpbp10.S	0.789297	0.0276582	LOC108718648	2.0211	0.000185443	tmem45b.L	2.73185	2.75077e-17	tmem265.S	3.53152	0.000882602	gjb3l.S	4.4809	0.000251544
rell1.S	0.785757	0.00342446	hes7.1.L	2.02001	0.0199853	cdh1.S	2.73084	1.20022e-34	olfm4.L	3.51943	5.19e-06	nxpe2.L	4.4648	1.44e-31
commd8.S	0.778239	0.0228701	nxpe2.L	2.0184	0.00111918	rasal1.L	2.72658	0.000737798	rasal1.L	3.51563	3.61e-13	Xelaev18013974m	4.46242	0.0281109
fam185a.L	0.774608	0.0200527	atf3.S	2.01419	0.00100491	mcidas.L	2.72597	6.52399e-05	sh3bgrl2.S	3.50451	0.000300738	pthlh.L	4.45913	0.020723
blcap.L	0.772229	0.00849894	upk3b.L	2.00957	2.74e-08	LOC108704327	2.72094	0.000483797	stmnd1.L	3.49445	0.0487797	sox3.L	4.45012	2.05e-12
rpl15.S	0.764788	0.0390487	fer1l4	2.00005	0.00137496	tnfrsf6b.L	2.71411	0.0173668	plcd3.S	3.49147	6.54e-05	LOC108705949	4.44951	0.000138343
traf4.L	0.756398	0.0429292	LOC100486385.S	1.9999	0.00133429	timp3.S	2.71026	4.85205e-06	MGC85509	3.48737	0.0223394	sgsm3.S	4.44467	5.17e-33
fam162a.S	0.756323	0.00569079	eppk1.L	1.99309	0.000126076	degs3.S	2.70883	4.12116e-05	fam83c.S	3.48498	2.72e-09	Xelaev18017454m	4.44038	0.0320321
gtf2f1.L	0.748111	0.000280669	stard10.L	1.99274	1.17e-06	pdk4.S	2.70078	8.34971e-11	sp7.S	3.47984	2.25e-27	rbbp8nl.L	4.42707	2.04e-24
prim1.S	0.746725	0.00496578	kalrn.L	1.98648	3.83e-05	zbtb7b.S	2.70027	1.21647e-11	specc1l	3.47914	4.72e-19	plcd3.S	4.40724	2.6e-09
rpl17.S	0.742182	0.0149496	id3.L	1.98176	9e-15	clns1a.L	2.69735	0.000312212	c2cd4d.S	3.47396	0.000561911	LOC108695829	4.40238	1.14e-30
dsn1.L	0.741311	0.0185619	grwd1-b	1.97991	0.0193574	iqsec3.S	2.69415	0.0122203	endod1.S	3.4698	2.4e-11	krt222.S	4.40021	2.51e-05
fam160b2.L	0.741067	0.0187962	hes2.L	1.97969	1.27e-05	nr1i3.L	2.69135	1.00424e-05	esrp1.S	3.46924	1.92e-48	kiaa1324.L	4.39749	0.00781569
gnl3.L	0.739925	0.018676	prdx4.L	1.97001	0.0262548	plk2.L	2.68332	3.60454e-06	chmp4c.L	3.45561	3.91e-06	LOC108706801	4.38768	3.94e-05
pinx1.L	0.727617	0.00398993	hist1h4d.L	1.96571	0.000350078	vtcn1.L	2.67775	0.00120824	pvrl4.S	3.44478	2.32e-14	slc17a9.L	4.37802	2.68e-18
midn.S	0.725823	0.0253537	upk2.S	1.96423	5.67e-07	tp53inp2.L	2.66973	8.67527e-11	cracr2a.L	3.44346	0.0493884	galnt6	4.37325	7.66e-37
gltscr2.L	0.717772	0.014282	pkp3.S	1.95484	1.31e-05	znf185.L	2.66861	9.54642e-07	nxpe2.L	3.44296	3.43e-26	Xelaev18022505m	4.36914	0.0341426
rpl15.L	0.716589	0.0067353	sbk1l.S	1.95273	7.24e-05	elavl3.L	2.66838	2.63828e-30	mtus1.L	3.44198	2.18e-31	ccdc64b.L	4.36873	0.00822782
iws1.S	0.714912	0.0102379	nop56	1.94738	0.0154221	LOC100493194.L	2.66783	0.000262236	muc5b	3.43895	2.12e-43	nipal1.L	4.36693	8.32e-09
fkbp1a.S	0.7112	0.00512334	rasd1.L	1.94314	3.25e-19	atp6v0a4.L	2.66176	0.00178469	tp53inp2.L	3.43881	1.17e-18	dync1i1	4.35956	6.61e-07
tada3.S	0.708137	0.0253537	tnfsf10l.L	1.94186	3.48e-08	msx1.S	2.65511	2.93955e-07	pou2f3.L	3.42965	5.41e-09	LOC108713870	4.35825	0.0289943
ybx2.S	0.706526	0.0270003	zfp36.L	1.94145	0.000197157	rgcc.L	2.65102	6.47966e-09	rnf43.L	3.42829	2.57e-05	LOC108701168	4.34761	1.13e-14
pqbp1.L	0.706426	0.0186492	MGC80993	1.93852	0.00494082	bhlhe40.S	2.64638	5.37555e-06	Xelaev18013974m	3.42576	0.0350886	gnb3.L	4.32818	6.49e-35
rps7.S	0.695854	0.0410697	xarp-like.S	1.93578	9.6e-06	paqr5.S	2.64578	0.000673172	klf3.L	3.41213	0.010305	hes5.5.L	4.31283	4e-13
ubc.L	0.693977	0.0168157	cdx2.L	1.92457	0.0298768	prss23.S	2.64542	0.00224348	trim16.S	3.41078	4.7e-08	clic3.L	4.31242	2.3e-12
hnrnpdl.L	0.685642	0.0253537	foxi4.2.S	1.92315	3.36e-13	1700030j22rik	2.64147	4.34189e-05	ptk2b.S	3.40315	5.38e-08	rflcii.L	4.30155	0.000271142
cwc25.L	0.682575	0.00310136	syn1.S	1.92164	0.0240227	nxpe2.L	2.63895	2.15119e-09	rbbp8nl.L	3.39295	6.81e-21	srrm4	4.29219	2.84e-12
c1orf35.L	0.679056	0.00748601	gpr65.S	1.92161	0.0112137	sox3.L	2.63657	2.88241e-07	ag1.S	3.39055	1.87e-15	btc.L	4.2861	0.00831964
ccdc124.L	0.670654	0.0106181	rbm47.L	1.91977	3.33e-05	b4galnt3.L	2.63655	3.36248e-13	LOC108715703	3.39055	2.1e-12	msgn1.S	4.28606	0.000141577
tada3.L	0.656436	0.0263596	prph.L	1.91654	0.00062586	Xelaev18026687m	2.63569	0.0391121	clcnkb	3.37898	6.52e-13	b3gnt7.L	4.28551	4.93e-27
pak1.L	0.65227	0.0235047	mob2	1.91348	3.39e-05	dixdc1.S	2.63302	0.0495962	cdh1.S	3.37294	1.74e-40	crnn	4.28035	0.000366333
ndufb7.L	0.651209	0.0409906	nxpe3l.6.L	1.90965	0.00035933	tmem265.S	2.62976	0.000570573	arhgap6	3.36452	2.31e-19	spry4.L	4.26819	2.5e-12
tpd52l2.S	0.643311	0.041333	prss8	1.90558	6.72e-05	fsbp-like.L	2.62691	7.30988e-26	tp73.L	3.36327	0.00471381	tp53inp2.L	4.26608	1.87e-13
immt.L	0.636243	0.00907098	abcb1	1.9044	1.61e-07	MGC80993	2.62574	2.63113e-16	usp43.L	3.36048	1.59e-13	b4galt4.L	4.26245	4.68e-08
ftsj1.S	0.630638	0.0413264	lfng.S	1.90007	3.51e-07	nrarp.S	2.61758	1.1557e-13	fzd3.L	3.35952	7.28e-19	anxa9.L	4.25278	9.46e-11
rtca.L	0.628705	0.0438512	metrnl.L	1.89967	3.45e-20	zfp36l1.S	2.61704	4.93856e-33	pvrl3.S	3.35731	8.22e-14	krt16.L	4.24232	2.13e-08
rev1.S	0.626116	0.0342249	cbln1	1.89964	0.01817	ptk2b.S	2.61615	6.98768e-06	cdx1.S	3.35658	1.94e-09	LOC108699634	4.23034	0.000330417
actr3.S	0.622527	0.0220149	cdkn2c.L	1.8966	0.00267711	Xelaev18001309m	2.61496	3.60286e-08	styk1	3.35415	2.07e-08	galnt12.L	4.22996	6.27e-21
npepl1.S	0.61616	0.0369383	rreb1.L	1.89036	2.3e-10	arhgef37.L	2.61133	0.00032032	bhlhe40.S	3.35093	1.42e-05	foxj1.S	4.22951	0.00169691
psma7.L	0.614863	0.0412781	prdm1.S	1.88762	1.34e-05	sh3bgrl2.S	2.61017	0.00388398	tp53inp2.S	3.34772	5.24e-26	gng13.S	4.22769	3.41e-06
nol10.L	0.605024	0.0324925	ptafr.L	1.88647	2.41e-08	nxpe3l.6.L	2.60945	5.78808e-15	ikbkg.S	3.3399	0.00142486	LOC108698515	4.22018	0.000244981
saal1.L	0.603384	0.0295142	Xelaev18018096m	1.88451	0.037642	LOC108719551	2.60781	0.037547	msx2.S	3.3317	3.01e-10	trpm4	4.21756	3.99e-36
trmt6.S	0.594377	0.0419533	rnf222.S	1.8839	1.13e-16	tnni2.L	2.60591	1.11008e-05	adal.L	3.33027	0.000877498	p2rx1.L	4.21726	2.09e-05
stip1.S	0.594167	0.0471981	sesn1.S	1.88244	0.0490851	tcf15.L	2.59873	0.00552222	elf1.S	3.32639	2.55e-23	slc16a3	4.21653	7.96e-37
csrp2.L	0.584142	0.033044	mmp14.L	1.88068	0.00117403	xbp1.S	2.59829	2.75566e-14	aldh1l1.L	3.31939	1.18e-23	Xelaev18014690m	4.21373	0.000747643
dnajc19.L	0.583417	0.043117	fzd6.L	1.86085	8.69e-06	Xelaev18036390m	2.58538	2.03036e-25	nodal.L	3.31754	0.00111578	pik3ap1.S	4.20393	2.5e-05
abt1.L	0.578437	0.0388978	uts2r	1.84979	0.00234672	plekhs1	2.58394	0.00254847	slc30a2.L	3.30999	9.63e-52	LOC108701721	4.19046	1.16e-21
pex19.L	0.574297	0.0261477	sowahb.S	1.84894	0.000162275	upk2.S	2.58284	7.95079e-14	arid3a	3.30819	7.4e-09	lhx5.S	4.18971	1.08e-07
hdlbp.L	0.569279	0.00664806	rab25.L	1.84846	0.0434573	mid1l2.L	2.5757	0.0378214	LOC108706801	3.30768	0.0055759	szl.L	4.18596	1.47e-11
cwc15.S	0.568383	0.0399738	LOC108705106	1.84308	0.00543116	ventx1.2.L	2.57265	2.49169e-23	dusp10.2.L	3.30697	0.00176607	ppl.S	4.18573	6.15e-15
pdcd11.L	0.563001	0.0353134	LOC108701168	1.83926	1.57e-05	rgma.S	2.57153	9.68235e-22	ahnak	3.30553	4.44e-09	chst9	4.18478	1.78e-17
snrnp70.L	0.548627	0.00623621	bmp4.S	1.83716	1.43e-10	fat2	2.56718	0.000495183	upk2.S	3.30529	2.81e-43	Xelaev18035564m	4.18399	0.0423766
scfd1.L	0.54569	0.0180165	dusp1.L	1.83607	8.93e-17	arhgap40.L	2.56045	0.00710724	fam195a.L	3.29654	3.44e-24	krt.S	4.17783	1.54e-21
gpatch4.L	0.545685	0.0113395	fmc1.L	1.83393	0.000199227	fzd4	2.55704	0.000516272	rbm47.S	3.29191	3.25e-35	tmem263-b	4.1465	9.29e-16
sap30bp.S	0.519053	0.0340085	mtx3.L	1.83376	0.0151618	epas1.S	2.55644	5.86377e-07	myc.L	3.28485	3.98e-61	sult6b1.5.S	4.13842	1.78e-08
ilf2.L	0.506425	0.0430515	arl4c.L	1.82901	0.00233032	mgst2	2.55483	0.0332078	krt18	3.28325	2.33e-07	bicd1	4.12609	1.6e-18
nop58.S	0.504997	0.0452697	Xelaev18005230m	1.82697	3.46e-06	upk3b.L	2.55462	2.02481e-13	sytl4.S	3.28025	5.83e-36	hoxc5.L	4.12406	5.02e-05
ubfd1.L	0.488012	0.0439189	LOC108716735	1.82157	0.00600301	capns1.L	2.55271	1.66239e-10	ccser2.S	3.28013	1.01e-22	Xelaev18011230m	4.11382	0.00246843
aars.L	0.46349	0.0457617	hsp90aa1.1.L	1.82148	0.0145774	pdgfb.L	2.54971	6.01523e-05	Xelaev18040913m	3.27476	9.38e-05	kiaa1324l.S	4.10862	1.64e-26
tpx2.L	0.456296	0.04893	znf148.S	1.82143	0.0222278	tead4.L	2.54204	1.19708e-10	bmp7.2.L	3.25337	1.29e-63	esrp1.L	4.10326	1.91e-53
haus6.S	-0.542811	0.049242	ier5l.L	1.82088	2.35e-16	lhfpl2.L	2.54085	1.42226e-11	bcl2l12.S	3.24437	2.14e-13	map3k10.L	4.09676	6.45e-33
dcp1a	-0.548374	0.0493662	slc25a34.L	1.8205	0.00499316	gstt1.L	2.53747	0.00106238	Xelaev18036472m	3.24064	0.00202616	fa2h.L	4.09621	5.05e-11
zic2.L	-0.57776	0.0218433	LOC108717260	1.81684	0.0371478	cd99l2.L	2.53593	9.74707e-19	tmem74b.L	3.22805	0.0304995	liph.L	4.08942	1.79e-15
usp22.S	-0.579662	0.0298086	rbm47.S	1.81596	7.19e-07	LOC108704120	2.52998	0.00834179	sp6.L	3.22661	0.00592282	hkdc1.S	4.07085	5.92e-13
med26.L	-0.596959	0.0409867	sat1.L	1.8118	2.97e-08	stard10.L	2.52903	1.17787e-11	slc45a3.S	3.22128	5.79e-16	gcm1.L	4.06061	2.38e-07
ssu72.S	-0.638494	0.0435512	sall3.S	1.8103	0.0191668	nipal4.S	2.52576	4.74281e-31	Xelaev18021866m	3.21836	0.000240262	xk81a1.L	4.06033	9.79e-41
nfrkb.L	-0.639273	0.0339892	LOC108696785	1.80892	0.0492551	ada.S	2.5135	0.00143109	kitlg.L	3.21323	1.27e-23	mboat1.L	4.05904	7.81e-42
gatad2b	-0.646582	0.0430396	acy3.L	1.79631	8.93e-07	rbbp8nl.L	2.51144	4.97677e-08	pprc1	3.21271	4.99e-22	abcc13.L	4.0559	0.00398306
mtfr2.L	-0.646849	0.0435118	nlrc4.L	1.79534	0.00157007	arhgap36.L	2.50098	2.73841e-06	rabgap1l.S	3.21165	1.68e-35	LOC108708075	4.05566	0.0108419
ahctf1.L	-0.647201	0.0227409	Xelaev18041975m	1.7938	0.00270074	slc9a3r2.S	2.4998	1.07811e-07	cplx3.L	3.20086	0.00961586	mrpl44.L	4.05354	3.88e-05
tex10.S	-0.653926	0.0426216	capns1.L	1.79271	0.000108627	muc15	2.4966	5.36602e-05	sdc1.L	3.20069	3.91e-57	szl	4.0533	2.1e-08
nuak2.L	-0.658913	0.0466482	slc9a3r2.S	1.78904	0.0148352	tfap2c.S	2.49544	1.01777e-10	ubp1.L	3.20006	3.08e-13	specc1l	4.04667	2.31e-29
cdc42se2-like.1.S	-0.661275	0.0486888	krt.L	1.78774	0.00510874	nat10	2.488	0.0478817	gpsm2.S	3.19734	4.38e-46	cel-like.1.S	4.04631	0.0143884
mast2.S	-0.667573	0.0175352	fut1.S	1.78406	6.75e-08	smad7.L	2.48279	4.77077e-11	htra1.S	3.19251	2.32e-16	slc9a3r2.L	4.04598	2.89e-17
elovl1.L	-0.679169	0.0101914	sema4a.S	1.78356	0.000274723	gse1.L	2.47277	5.52721e-08	rabgap1l.L	3.19079	1.5e-27	krt17.S	4.04556	0.0141292
phlpp1.S	-0.690802	0.0210689	LOC108705992	1.78064	4.33e-09	inpp5a.2.L	2.47064	0.00210465	cd99l2.L	3.19027	3.05e-19	LOC108705245	4.04544	0.0237995
arl10b.S	-0.691667	0.0065129	sik1.S	1.77719	0.00463574	trim16.S	2.46853	0.00124359	ghr.L	3.18889	0.00029955	MGC68910	4.04105	8.62e-06
esg2-a	-0.695195	0.0248164	cfp.L	1.76778	0.000961	Xetrov90002352m.L	2.46633	0.000977769	clns1a.L	3.18552	1.37e-06	gcnt4	4.0392	1.78e-11
ppp1r12a.S	-0.704243	0.0216348	LOC108712963	1.76765	0.00692961	tmem163.S	2.46587	6.70972e-05	Xelaev18026687m	3.18485	0.000561863	lgalsl.S	4.03469	2.88e-16
tle4.S	-0.710438	0.0416667	evpl.L	1.76571	0.00651017	sdc1.L	2.46483	4.30337e-06	smad9	3.18266	0.0354269	tnfrsf10b.L	4.0333	6.46e-10
cpeb2-like.S	-0.722422	0.0409867	abcg2.S	1.76498	1.36e-05	pdgfa.L	2.45305	8.59594e-11	twsg1.S	3.18069	7.37e-19	fzd3.L	4.03229	1.37e-26
pop4.L	-0.72552	0.0374848	herpud1.S	1.76232	1.29e-07	ccdc68.L	2.45158	0.00631168	hes5.1.L	3.17807	2.31e-09	osbpl2.S	4.02503	6.64e-27
gse1.S	-0.741006	0.0144166	slfn13.L	1.76116	0.0250455	clic3.L	2.44588	6.39602e-06	timp3.S	3.17665	1.05e-08	LOC108699205	4.02053	7.5e-05
per3.L	-0.741188	0.00406582	poli.S	1.75599	0.000711758	comt.2.S	2.44149	3.64695e-05	tuba1cl.2.L	3.17435	0.00302322	vasn.S	4.02033	7.7e-06
peli1.S	-0.748661	0.000518986	cbfa2t2.L	1.75343	8.7e-08	mob2	2.43408	2.3943e-08	zbtb7b	3.17413	0.000110512	tp53inp2.S	4.01419	5.48e-15
stox2	-0.753183	0.0439445	sh2d3c.S	1.75092	0.000341868	rnf222.S	2.43303	2.2314e-30	sbk1l.S	3.16892	1.76e-13	snapin	4.00992	0.00313326
ikzf5.L	-0.757794	0.0229425	LOC108709519	1.74918	0.000166169	rpe65.S	2.41951	4.88385e-12	sowahb.S	3.16829	1.17e-14	snx22.L	4.00974	2.6e-11
cxcr4.L	-0.760939	0.0123712	slc27a3.L	1.74776	2.28e-05	chrna2.S	2.41854	4.96879e-06	spns1	3.15854	3.31e-11	styk1	4.00139	2.84e-07
Xelaev18001896m	-0.762904	0.0364533	styk1	1.74009	0.0408201	LOC108709518	2.39767	0.0232433	tuba1a	3.15817	4.83e-06	itln1.S	3.99255	0.00358626
ddx6.S	-0.774103	0.0312637	muc15	1.73961	0.000761688	rab11fip4l.L	2.3944	6.73882e-30	ahsa1.L	3.15517	2.35e-14	creb3l4.S	3.98917	1.02e-22
iscu.S	-0.777662	0.0267647	lrrn1.S	1.73915	0.0302765	c5.2.L	2.39413	0.000278436	gby.L	3.15043	0.000571383	MGC80993	3.98814	7.6e-14
rap2b.L	-0.780833	0.0365781	lfng.L	1.73888	0.0185773	slc35d2.S	2.38605	0.00142494	rhou	3.14879	5.23e-19	tbc1d30.L	3.98571	1.65e-26
lsm14b.S	-0.780951	0.0336844	prpsap1.S	1.73668	0.00265662	slc2a2.L	2.38553	1.20972e-34	nipal4.S	3.14551	1.18e-44	myf5.L	3.98292	3.02e-06
npm1.L	-0.783318	0.0007153	gpr143.L	1.73284	0.00409507	mxi1.L	2.382	3.2928e-25	id2.S	3.13738	3.73e-48	dmxl1.L	3.972	1.12e-10
rab20.S	-0.78433	0.0279149	Xelaev18014773m	1.72684	0.000379237	efnb3	2.37998	3.09649e-06	krt80.S	3.11874	0.0397138	LOC108711699	3.96891	0.018482
ssu72.L	-0.7887	0.0407252	Xelaev18028552m	1.71967	0.0200159	serpinh1.S	2.37897	1.10039e-05	plaur	3.11441	8.39e-06	Xetrov90001852m.L	3.96546	0.00307591
gnal.L	-0.817908	0.0470112	Xelaev18037842m	1.71813	0.00261676	gjc2.L	2.37834	7.13096e-06	ptmap4	3.11367	0.00479346	atp6v0a4.L	3.9606	0.00308373
mink1	-0.819545	0.0105514	suox.S	1.71802	0.000164211	tmem221.L	2.37631	0.000496012	wnt5b.L	3.11205	1.12e-20	slc10a4.S	3.95072	0.0214065
ctnnbip1.S	-0.830549	0.041762	gli2.S	1.71795	0.00458319	akr1c2.L	2.37414	0.0169485	mesp2.S	3.10783	0.00115518	klf4	3.94682	8.24e-06
blm.L	-0.845454	0.0342249	rnf144b.S	1.70731	6.4e-06	relt.L	2.37211	1.11738e-07	irf8.S	3.10728	9.75e-06	hoxa7.L	3.93778	6.16e-06
lonrf3.L	-0.847309	0.0477968	slc17a9.L	1.70547	4.69e-05	klf11.L	2.37029	2.11277e-08	LOC108701168	3.10556	9.89e-19	sf1.L	3.93612	0.0397897
ranbp9.S	-0.855779	0.029893	LOC108716586	1.70011	0.040393	c15orf39.L	2.36798	7.67042e-23	herpud1.S	3.10488	1.62e-17	znf750.S	3.90849	2.4e-42
fmnl3	-0.856301	0.00815619	pcdh18.L	1.69753	0.0157728	gipc1	2.36555	3.73465e-05	evx1.L	3.10436	1.16e-07	tacr1.S	3.90688	0.0288972
wdr82.S	-0.866854	0.0474919	dgka.L	1.69337	0.000739212	specc1l	2.36487	4.51897e-07	slc22a5.L	3.10071	4.87e-23	diras2.L	3.90475	0.0057502
fam43a.S	-0.869328	0.0388145	sox15.L	1.69288	5.43e-19	LOC108714950	2.35481	0.000104174	fer1l4	3.1001	1.8e-09	lrrn1.L	3.90435	7.12e-25
cdk8	-0.869962	0.0241098	Xelaev18043700m	1.69038	0.021915	LOC108695829	2.34954	3.65251e-08	Xelaev18046918m	3.10007	0.0373676	bmpr1b.S	3.90109	0.00403578
Xelaev18045296m	-0.874162	0.0394311	elf1.L	1.68935	2.38e-15	gcm1.L	2.34905	0.00587338	rbp2.S	3.09657	0.0144437	hoxb7.S	3.8965	0.000203003
cdc42ep4.S	-0.87743	0.0225081	scnn1a.L	1.68717	0.00340994	parp3.L	2.34739	2.08713e-06	LOC108709394	3.08687	0.000313024	lmo2.S	3.88259	0.00234785
rin3.L	-0.878058	0.00334542	mgc75753.L	1.68478	2.04e-08	dll1.L	2.3473	3.01613e-07	figf.L	3.08433	2.02e-10	tnfrsf12a.L	3.87349	0.00941921
espl1.L	-0.879299	0.0352475	tlr2	1.68112	1.67e-06	vangl1.S	2.34437	2.18964e-08	pde4a	3.08289	1.18e-05	MGC114904	3.86625	2.56e-07
agmat.S	-0.888168	0.0206419	relt.L	1.67387	0.00219594	fzd3.L	2.34407	1.44961e-09	fut1.L	3.07953	5.87e-11	hoxa6	3.86592	0.000401076
gtf2ird2b	-0.888831	0.0436226	tmem221.L	1.67337	0.00918453	lrrn1.S	2.34189	1.71649e-08	slc35d2.S	3.07736	1.81e-06	eps8l2.L	3.86316	3.96e-10
tdrd9	-0.892499	0.0253537	LOC108699241	1.67113	0.000190415	slc30a2.L	2.34179	4.65692e-31	smad9.S	3.07607	1.09e-09	hopx.L	3.85822	0.0219576
kpna4.S	-0.893131	0.0429487	LOC108698113	1.66348	3.24e-06	mycl.L	2.34112	1.59664e-17	ston2.L	3.07493	1.42e-07	upk2.S	3.85808	1.14e-47
paqr3.L	-0.89703	0.013571	hao2.L	1.6606	0.0199413	kalrn.L	2.33718	1.02641e-06	LOC108719446	3.07157	0.00118613	irf5.S	3.85571	0.00343859
mkln1.S	-0.89819	0.0110827	lrrn1.L	1.65802	0.000827485	rab11fip2.S	2.33687	2.19075e-14	Xelaev18000483m	3.07063	3.49e-10	fut2.L	3.84859	1.6e-05
klhl15.L	-0.898638	0.00217549	krt5.7.L	1.64921	2.25e-06	fam13c.S	2.33208	0.0009175	prrt3-like.L	3.07029	1.03e-05	bspry.L	3.8454	3.08e-14
mbip.L	-0.900214	0.000895483	il17rd.S	1.64469	8.21e-18	uck2.S	2.33125	1.00628e-15	tsr3.S	3.06894	0.0494619	rasl11b.L	3.84477	1.8e-08
ficd.S	-0.900531	0.0378047	fsd1l.L	1.64137	0.00921899	skida1.S	2.3286	0.00343365	Xelaev18015466m	3.05731	0.0281589	adam28.1.L	3.8428	1.49e-06
ets2.L	-0.901685	0.0198776	rab11fip3.L	1.63905	6.69e-06	lmod1.S	2.32769	0.00018907	ly6e	3.05677	0.000400553	fgf4.L	3.84272	0.0240348
ell2.S	-0.902327	0.00513688	rabgap1l.L	1.63706	3.68e-10	akip1	2.32173	0.0168725	stard10.L	3.04513	1.76e-28	Xelaev18047000m	3.83809	0.00893793
cdc14b.L	-0.907485	0.0297394	alcam.L	1.63104	2.72e-07	rnf152	2.31894	0.00373454	ada.S	3.04178	0.000612177	sp6.L	3.83311	0.000283964
rffl.L	-0.911235	0.0337121	pik3ip1.L	1.63006	0.000849706	prph.L	2.31853	6.70783e-11	slc9a7	3.04119	8e-21	nat10	3.83163	0.00234222
dctn6.L	-0.913561	0.00304379	loxl1.L	1.62766	0.000532637	gpsm2.S	2.316	1.45876e-36	Xelaev18036390m	3.03678	3.67e-35	sowaha.L	3.82593	0.00476034
shf.S	-0.914366	0.0390906	anxa2.L	1.62307	0.000273917	onecut1.2.S	2.31426	4.15282e-07	b4galnt3.S	3.03666	0.000856699	cenpv.L	3.82187	4.15e-12
rasl11b.S	-0.919076	0.0241417	sema4c.L	1.62232	0.0180639	ifnlr1.L	2.30732	2.35788e-07	fcn2	3.03559	9.47e-10	foxh1.2.L	3.81405	8.86e-07
frmd4b.L	-0.928481	0.000573032	fam177b.L	1.62041	0.0274305	Xelaev18004205m	2.29752	0.00967267	adra2a.L	3.03236	2.49e-06	galnt6.3.L	3.81404	7.82e-05
ppargc1a.L	-0.9329	0.0388145	id2.S	1.61766	2.59e-05	dab2ip-like.L	2.29016	0.000108752	Xelaev18017809m	3.03181	6.5e-18	ptgs2.L	3.81022	3.15e-37
etv3l.S	-0.944851	0.00362784	klf11.L	1.60652	0.000367284	bcl9l.L	2.28512	2.74446e-05	mfsd6l.L	3.02898	1.66e-11	pprc1	3.80411	6.12e-37
vezf1.L	-0.948418	0.0452697	pdk4.L	1.60599	0.0025815	nxpe3l.1.S	2.28418	0.00452738	ncam1.L	3.02769	1.09e-05	lgalsl.L	3.79814	4.46e-24
picalm.S	-0.948983	0.0194555	rhou.L	1.60492	0.000485398	ccng1.L	2.283	1.5739e-05	rcn3.L	3.02204	1.82e-21	MGC52827	3.79623	9.2e-15
fgd4.S	-0.952002	0.01077	rarg.S	1.60423	1.45e-17	sh2d3c.S	2.28028	1.23177e-09	rasd1.L	3.02004	1.37e-25	slc45a3.S	3.79443	7.93e-29
ccnd2.S	-0.954855	0.0335836	tmem45b.L	1.60347	0.000235999	sema3f.L	2.27975	1.69656e-10	bambi.S	3.0188	4.92e-46	eppk1.L	3.79434	3.69e-23
znf800.S	-0.956352	0.0338488	sox3.S	1.60209	4.14e-10	rab25.L	2.27943	1.65847e-08	neurl1b.L	3.011	7.62e-16	sptlc3.S	3.79055	2.84e-17
tuba4b.L	-0.958163	0.0245608	asl.L	1.59929	2.52e-05	tmem265.L	2.27841	9.4455e-05	trabd.S	3.00655	9e-06	chmp4c.L	3.78303	2.95e-12
adpgk.L	-0.959043	0.000650841	Xelaev18003310m	1.59705	0.00130192	nif.L	2.27763	0.0031263	ociad2.S	3.00201	0.000161576	areg.S	3.7819	5.81e-05
rnf114.L	-0.961306	0.0390487	epas1.S	1.59274	0.00856475	ier5l.L	2.27519	2.63613e-12	zc3h12c.L	2.99552	4.78e-06	slc3a2	3.78132	7.61e-15
ube2v1.S	-0.962467	0.022863	hpgd.L	1.59132	1.35e-07	rbm24.L	2.27316	1.14628e-05	Xelaev18040914m	2.99371	1.63e-05	rab3d.S	3.76686	4.85e-10
wac.L	-0.968246	0.0139648	trim67.S	1.59042	0.0347822	sncg.L	2.27089	0.0231128	smad9.L	2.99177	3.12e-08	esrp1.S	3.76675	6.21e-46
sgk223.L	-0.970381	0.000576075	chst9	1.58836	0.000149329	cyp1a1.L	2.26987	4.74808e-05	hes8.S	2.99034	0.0188798	col5a2.S	3.7665	9.08e-05
c12orf66.S	-0.972393	0.0043235	LOC108713255	1.58601	0.00198171	slc9a2	2.26437	2.37049e-05	pdgfb.L	2.9897	2.33e-09	dnajb9.L	3.76183	3.87e-10
peli2.S	-0.98655	0.0464728	dmgdh.L	1.58584	0.0144451	plcd3.S	2.26236	0.0104296	cysrt1	2.98505	9.17e-47	s100a10.S	3.75837	9.33e-11
acvr2b.L	-0.987646	0.0280922	gli1.S	1.58549	0.000287146	rhou.L	2.25592	6.33536e-25	atp1b2.S	2.98179	2.46e-11	trim29.L	3.75366	4.84e-31
trim39.L	-0.991522	0.00138399	epha2.L	1.57768	0.000105351	efnb3.L	2.25249	7.32837e-07	als2cl.L	2.97431	2.97e-07	LOC108718814	3.752	3.75e-05
LOC108709654	-1.0048	0.0370134	s100g	1.57535	0.0438094	esrrg.S	2.25196	0.00581991	map3k10.L	2.96794	1.26e-36	LOC108698173	3.74805	8.31e-05
LOC108719569	-1.0095	0.0145477	akip1	1.57487	0.0118609	f2rl1.L	2.24202	5.49916e-08	upk3b.L	2.95878	1.03e-18	ccno.S	3.74573	1.67e-07
fgfr1.L	-1.01964	0.000863721	nop56.S	1.56936	0.0173197	arhgap6	2.24139	0.000606524	itln1.S	2.95868	0.00845857	wnt8a.S	3.73523	1.25e-10
commd3.S	-1.02476	3.03e-06	LOC108697295	1.56462	0.0178299	tll1-like.1.L	2.23958	5.73229e-08	slc18a2	2.95704	0.000102822	gcna	3.73107	2.11e-07
mapk6.S	-1.03042	0.0286728	fth1.S	1.56281	1.24e-08	creb3l4.L	2.23698	0.0162352	gpr160.L	2.95602	8.97e-19	slc44a4.L	3.72244	2.4e-19
asphd2.S	-1.03272	0.00300794	ppt1.S	1.56068	0.000127407	Xelaev18007686m	2.23496	0.000638706	fam160a1.L	2.9555	6.45e-06	LOC108712649	3.71827	0.0385177
tanc2	-1.03559	0.007078	nipal4.S	1.55475	6.71e-08	ccne2.S	2.22968	1.16135e-07	inpp5a.2.L	2.95472	1.15e-05	casd1.L	3.71401	1.52e-12
gnaq.L	-1.0414	0.0370134	LOC108712518	1.55107	0.0207633	Xelaev18039481m	2.22941	0.0200381	foxi4.2.S	2.95069	1.43e-09	golph3l.S	3.71097	1.36e-22
usp31.S	-1.0497	0.00469714	chd3	1.5482	3.45e-08	grhl1.L	2.22926	6.07939e-14	tRNA-Ala	2.94369	0.0494619	lpl.L	3.71014	0.00973901
cdkn2d.L	-1.04995	0.00336622	Xelaev18007686m	1.5417	0.0218836	syn1.S	2.22674	9.44917e-05	gcm1.L	2.941	2.33e-05	rock1	3.70921	6.11e-23
znf518a.S	-1.05006	0.00157106	ag1.L	1.54105	0.000125571	prss8	2.22257	1.27658e-09	b4galt5.S	2.92807	4.32e-23	LOC108702843	3.70871	1.26e-12
znf142.L	-1.05049	0.0336907	sowahc.L	1.53784	7.03e-07	tp53inp2.S	2.21422	1.70144e-15	yrdc	2.9276	6.64e-09	slc9a7	3.69844	1.64e-24
nacc1.L	-1.05675	0.0494994	post10.L	1.53776	0.000129407	mansc4-like.S	2.21393	0.0285321	prickle3	2.92601	0.000273563	c17orf97	3.69636	3.26e-11
LOC100158389	-1.05869	0.0174623	tnfrsf10b.S	1.53753	4.85e-06	oxr1.L	2.21044	1.38613e-30	mfsd6.L	2.91634	3.93e-14	slc6a16.L	3.69341	0.002948
amfr.S	-1.06515	0.0167899	LOC108700879	1.537	0.0285028	crabp2.S	2.20731	0.00198699	kifc3.S	2.91223	1.7e-07	LOC101730741.L	3.67814	0.0304023
cbx6.L	-1.0782	0.0227329	LOC108698396	1.53694	0.00115972	esrp1.S	2.20532	3.25118e-12	LOC108696907	2.91016	0.0301869	wfikkn1.L	3.67345	1.31e-09
mob3c.S	-1.08671	0.00315636	slc30a2.L	1.53206	1.46e-11	rabgap1l.S	2.20483	9.87248e-22	LOC108698406	2.89828	0.00588724	post10.L	3.67117	1.26e-18
efna1.L	-1.09953	0.0417787	rabgap1l.S	1.52847	1.34e-13	fut1.L	2.20267	7.40261e-08	b3gnt7.L	2.89751	4.03e-14	post7p.L	3.67114	1.3e-21
LOC108698822	-1.11811	0.0333976	otud1.S	1.52697	1.65e-06	evx1.S	2.20016	0.0250255	LOC108695829	2.89647	1.67e-10	slc1a3.S	3.66424	0.000249766
furin.S	-1.12686	0.0200527	sema6d.L	1.52236	2.38e-06	pdcd11	2.19919	0.00213897	hspa13.L	2.89238	9.88e-20	fgf3.S	3.66286	6.39e-14
baz2a.L	-1.13053	0.030667	oxr1.L	1.51855	1.37e-08	LOC108698063	2.19687	7.38718e-07	capns1.L	2.89221	1.13e-22	slc30a2.L	3.65937	3.72e-25
ticrr.S	-1.1366	0.00222524	rps12.L	1.51734	5e-08	LOC108711622	2.19637	2.99586e-17	rab11fip2.S	2.88523	1.36e-22	gadd45b.L	3.65574	8.63e-10
n4bp2l2.S	-1.14065	0.0217068	zbtb7b.S	1.51716	0.0176881	id2.S	2.1941	8.57021e-12	kcnj15.L	2.88512	3.03e-07	c14orf37.L	3.65228	4.16e-18
aagab.L	-1.14274	0.0235206	ap1m2.L	1.51577	0.000322258	LOC432186	2.19385	0.0185481	anxa9.L	2.88287	0.000481776	hspa5.S	3.64808	1.61e-27
zbtb8b.S	-1.14955	0.00671892	pou5f3.2.S	1.51144	4.77e-06	LOC108706106	2.19287	0.000268125	Xelaev18003947m	2.88139	0.0448148	kcnn3.L	3.64629	0.0138544
myc.S	-1.15515	1.12e-06	creb3l2.L	1.50984	4.94e-05	rhebl1.L	2.19068	2.77927e-22	rassf3.L	2.88051	3.07e-30	hoxb9.S	3.64514	0.00347597
vkorc1l1.L	-1.16044	0.00933505	LOC108698063	1.50944	1.71e-05	LOC108698216	2.18839	5.68906e-07	hes6.1.L	2.87217	1.57e-11	tmem204.L	3.64237	0.0386529
arhgap31.L	-1.16137	0.0119526	LOC108718087	1.50119	0.00036036	scnn1a.L	2.18367	2.0236e-10	dhfr.S	2.87117	0.0440655	slc18a2	3.63969	2.19e-08
b3gnt2.S	-1.16257	0.00104214	tp53inp2.L	1.49902	0.00402238	chmp4c.L	2.18354	2.60113e-05	LOC108712963	2.86932	2.96e-13	gsx1.S	3.63877	0.0153449
Xelaev18038858m	-1.16421	0.049242	fgfr2.S	1.49734	0.009307	LOC108704302	2.18197	4.84147e-06	LOC108701735	2.86392	0.0210653	fam83c.S	3.63727	1.19e-19
Xelaev18001402m	-1.17483	0.0429487	maea.L	1.49595	0.0167653	ptafr.L	2.18162	5.34659e-12	gdpgp1.S	2.86245	5.38e-15	hoxa9.L	3.63663	5.91e-06
tlr13	-1.1825	0.0129978	bpgm.L	1.49297	0.00791814	fer1l4	2.1801	1.27168e-06	hspa5.S	2.84994	2.08e-13	sbk1l.S	3.63646	2.92e-07
irs2.L	-1.19265	0.0316027	ckap4.S	1.49222	8.56e-07	wasf3	2.17685	0.000416986	tnip2.L	2.84902	5.97e-14	alg11.L	3.63214	2.93e-08
vezf1.S	-1.21326	0.00710954	rarg.L	1.48903	0.00180922	LOC108717439	2.1756	0.00559099	efnb3	2.84882	4.97e-10	Xelaev18021439m	3.63127	0.00265467
Xelaev18032677m	-1.237	0.0410934	rasef.S	1.48749	6.1e-09	fsd1l.L	2.1706	5.18506e-05	nat10	2.84166	0.0262144	LOC108701166	3.61491	1.26e-31
parp2.L	-1.24037	0.0342249	trpv6	1.48626	7.46e-07	theg-like.S	2.16761	0.0163112	lrat.L	2.83163	0.00954335	trim68	3.61372	5.2e-05
arv1.L	-1.24097	0.00315636	LOC108715136	1.48132	0.00196517	tuba1a	2.16693	0.0195544	Xelaev18014690m	2.82164	0.0268718	ccdc105.S	3.61	0.0024541
csk.S	-1.24304	0.000572688	psmd14.L	1.48037	0.0250811	fcn2	2.16423	2.22098e-06	tmcc3.L	2.81773	3.91e-13	arhgap30.S	3.60792	0.0019287
rab2b.L	-1.24401	0.00748601	adap1.L	1.47911	0.0338139	rasef.S	2.16328	1.92622e-13	znf148.S	2.81584	1.8e-06	fsd1l.L	3.60386	4.89e-09
msi1.L	-1.25072	1.24e-07	cecr2.S	1.47783	0.00137629	endod1.S	2.15863	4.42948e-05	zbtb7b.S	2.80918	5.69e-17	zbtb7b.S	3.59849	2.04e-16
wnt11b.L	-1.26856	0.0149496	sfrp2.L	1.47076	0.0343222	dyrk3.L	2.15787	1.19468e-10	LOC108698798	2.80476	5.57e-05	mapkapk3.L	3.59707	0.0397783
Xetrov90016856m.L	-1.2758	0.0126639	ier5.L	1.4661	1.04e-08	krt5.7.L	2.15022	1.56623e-12	dll1.L	2.80414	4.31e-20	oat.1.L	3.58431	5.32e-20
mid1.L	-1.29864	0.00623621	khdrbs3.S	1.46427	0.00586074	Xelaev18017809m	2.14693	3.0025e-10	LOC108703574	2.80361	0.00722469	LOC108705675	3.58276	0.0155723
pygo1.L	-1.31402	0.0429292	uck2.S	1.46216	0.000294571	xicl	2.14404	8.5923e-21	vill.L	2.80124	1.39e-05	klf2.S	3.58103	1.21e-07
pmepa1.L	-1.333	0.0224564	efna4.L	1.46146	1.08e-11	prph.S	2.14134	0.000567085	slpi	2.79421	0.00628965	gnb3.S	3.57459	2.96e-25
sun1.L	-1.33986	0.0231402	pnp.L	1.46041	0.0472568	fjx1.L	2.14122	0.0277399	uck2.S	2.78652	7e-22	amotl1.L	3.56918	9.53e-47
mbd6.S	-1.34396	0.0201313	LOC108710017	1.45632	0.000160393	tmcc3.L	2.1378	1.77777e-10	MGC98819	2.78548	7.04e-27	dbndd1.L	3.56891	0.0337966
frmd4b.S	-1.3627	0.000541564	xbp1.S	1.45625	8.21e-05	sult6b1.5.L	2.13622	1.66183e-05	nr1i3.L	2.78068	3.92e-07	slc35b4.L	3.56867	4.9e-06
exog.L	-1.375	0.0158156	has1.S	1.45442	1.01e-08	LOC108701168	2.12984	9.33053e-09	gfod1	2.77608	1.34e-09	casp7	3.56531	4.77e-17
nedd1.S	-1.38015	0.013754	elavl3.L	1.45152	0.00104041	fblim1.L	2.12979	0.00179092	dnajb9.L	2.77575	7.62e-08	slc16a12.S	3.56254	2.84e-13
mapk6.L	-1.3889	0.000136705	sepp1.L	1.43941	0.0424268	sema4c.L	2.12828	1.16509e-18	tbp.L	2.77002	1.55e-07	t2.S	3.56106	0.0144105
mbd6.L	-1.38923	0.00519626	ube2e2	1.4387	0.00227656	esrp1.L	2.12751	2.31939e-21	elavl3.L	2.76737	8.31e-15	MGC98819	3.55783	1.11e-23
LOC108708738	-1.3954	0.000774568	znf703.S	1.43752	0.00419918	ablim1	2.12733	3.60847e-12	lmo4.2.L	2.75157	5.15e-19	styk1.S	3.55754	8.03e-09
pde7a.S	-1.42568	0.00258622	sall3.L	1.43617	0.00146414	c2cd4d.S	2.12621	0.00665076	LOC108718087	2.75045	2.17e-11	c1galt1.L	3.54969	1.16e-15
efs.S	-1.43715	0.0452697	znf451	1.43212	0.00761513	Xelaev18002864m	2.1253	0.00629715	xbp1.L	2.74797	3.11e-25	tmem87b.L	3.54961	3.99e-18
ND5	-1.442	0.0337121	prickle3.L	1.4293	0.0143242	LOC108699767	2.11354	0.0033713	MGC147188.L	2.7448	0.000217334	LOC108713747	3.54748	0.00595237
LOC108696783	-1.44259	0.00746805	gins1.S	1.42915	0.015632	umod.2.L	2.11207	0.0242608	chkb.S	2.74172	1.08e-11	c2cd4d.S	3.54665	0.00355149
prickle1.S	-1.44766	1.2e-13	rnf138.S	1.42591	0.000848454	atf3.S	2.1086	0.000742629	cxcl12.L	2.74084	2.57e-10	mgc147226.S	3.54561	0.000111923
zfhx4.L	-1.4573	0.0173132	upk2.L	1.42454	0.000495538	bcorl1.S	2.10815	1.47469e-10	pik3ap1.S	2.73048	0.0203919	stard10.L	3.54468	2.84e-21
klf10.S	-1.4582	1.15e-08	bcl9l.L	1.42325	0.0015336	wnt5b.L	2.10449	1.61777e-06	kcna3.S	2.72474	0.00168397	rabgap1l.S	3.54464	3.35e-26
socs2.L	-1.48255	0.0226559	LOC108697862	1.42308	5.86e-08	Xetrov90008961m.L	2.10402	0.0089033	tmem263-b	2.71649	1.68e-10	ikbkg.S	3.54192	0.00675637
LOC108717174	-1.4995	0.0492479	LOC108701666	1.42239	0.00634022	LOC108700281	2.1	2.27755e-11	golph3l.S	2.71336	1.05e-20	rab19.L	3.53796	1.5e-11
ddit4.S	-1.50237	3.92e-05	tcf7l1.S	1.42135	1.35e-07	cnfn.1.L	2.09932	0.00395548	aim1.S	2.69865	1.59e-08	sytl4.S	3.53726	3.44e-23
bmpr2.L	-1.50237	0.0170545	sft2d3.S	1.41928	1.46e-05	MGC85058	2.0993	4.39498e-12	oat.1.L	2.69207	1.99e-16	tRNA-Gln	3.53089	0.0317065
sox17b.2.L	-1.50274	2.8e-05	tuba1cl.2.S	1.41711	9.57e-08	creb3l2.L	2.0973	1.92588e-05	LOC108701721	2.68458	1.26e-24	mfsd6.L	3.53051	3.39e-13
pmepa1.S	-1.50335	0.0393924	LOC108701212	1.41592	5.55e-07	chd3	2.09656	9.63661e-10	insm1.S	2.68005	0.000148955	tmem8a.L	3.53022	2.16e-14
LOC108701311	-1.51879	0.01186	snrpa1.L	1.41505	0.00141701	nectin1l1.L	2.09275	0.00306885	syt3.S	2.67933	0.0436174	LOC108701735	3.52735	0.0264445
cmtm8.L	-1.53178	0.000469568	Xelaev18000483m	1.41426	0.0152334	tada2a.L	2.08176	4.75921e-07	stard10.S	2.67611	4.82e-12	anxa4.S	3.52692	6.92e-05
tmem178b	-1.55213	0.000228886	ccdc9b	1.41289	0.00364411	LOC108716856	2.07862	0.0284905	dlx6.L	2.67528	0.0016285	upk1b.L	3.52403	6.93e-48
LOC108695556	-1.55714	0.000899121	Xelaev18004702m	1.41259	0.0117068	LOC108706865	2.07169	0.00539188	hras.L	2.66922	3.35e-20	cdc20b.L	3.5239	0.0036378
Xelaev18030509m	-1.5624	0.00175397	tp53inp2.S	1.41029	1.26e-05	mdk.S	2.06951	0.000311061	cldn3	2.6666	0.0443722	sec24c.L	3.52069	9.15e-06
tbc1d24.2.S	-1.57408	0.0263591	MGC52622	1.40339	0.000260036	foxh1.S	2.06677	0.0160951	cbfa2t2.L	2.6661	1.23e-06	fam3d.S	3.51542	5.11e-17
Xelaev18026877m	-1.57582	5.4e-05	Xelaev18044839m	1.39586	0.0446225	LOC108712963	2.06634	3.21792e-05	gstt1.L	2.6648	2.11e-05	myo1e	3.51222	3.24e-16
agbl1.S	-1.57723	0.0120359	midn.S	1.39506	1.64e-09	slpi	2.06597	0.0402398	slc9a2	2.66268	2.95e-09	cysrt1	3.5099	9.27e-25
gm4070	-1.57946	0.0186492	birc2.S	1.39352	0.000522683	Xelaev18012199m	2.06448	0.00134606	gopc.L	2.66215	7.06e-20	gfod1	3.50929	2.5e-16
plk3.S	-1.58279	5.95e-10	tmprss3.L	1.39271	0.0114987	b4galt5.S	2.06376	2.25413e-08	LOC108696785	2.66158	0.00667877	acpp	3.50461	1.02e-22
LOC108719541	-1.59484	0.0434559	LOC108719789	1.38875	0.00315803	mtus1.L	2.06074	1.70666e-21	smad6.2.L	2.6615	4.66e-06	pmm2.L	3.50449	8.15e-16
slc18a1.S	-1.59589	0.00442347	c5orf15.S	1.38829	0.0023998	LOC108714685	2.05905	2.4134e-06	nkx3-1.L	2.66062	0.0106782	mfsd6l.S	3.5025	6.73e-09
LOC108704394	-1.60437	0.00143008	LOC108699910	1.38461	0.00707003	ccnb1ip1.L	2.05641	0.0171021	krt8.2.L	2.65429	0.00527821	wnt5a.S	3.5009	6.04e-06
LOC108702458	-1.60494	0.0369899	timm17a.S	1.38406	0.000157867	gpr143.S	2.05537	0.000491574	esrrg.L	2.65304	0.00114102	dhfr.S	3.49406	0.00424867
pygm.L	-1.61094	0.0119931	rpl23.S	1.37851	2.21e-06	smad9.L	2.05459	1.83748e-07	sidt1.L	2.65294	0.000263025	hoxd4.L	3.49133	0.0259906
tmcc1.S	-1.61541	1.64e-10	tuba3c.S	1.3743	0.00130945	msx2.L	2.05187	6.81948e-13	ppt1.S	2.65101	4.15e-13	lrrc31	3.49078	0.0309904
lrig3.L	-1.62401	4.97e-07	egln3.S	1.37424	0.0232802	tgif2.S	2.04191	5.17763e-15	MGC81163	2.65054	1.95e-12	stat1.S	3.48559	0.0271808
tmcc1.L	-1.63156	8.21e-10	jag1.L	1.37416	0.00761513	zmiz2.S	2.03886	1.80114e-08	LOC108704120	2.64934	0.00794584	tmem221.L	3.48321	0.00619661
spred3.S	-1.65219	0.00332463	hdhd3.L	1.3712	0.014229	rdd4.L	2.0369	0.00598327	hic2.L	2.64648	4.8e-24	wnt5b.S	3.4826	5.08e-14
vegt.L	-1.65761	0.00113137	MGC52827	1.36759	0.0250811	atf6b.L	2.03224	2.44197e-07	cenpn.S	2.64307	2.68e-11	fam160a1.L	3.4812	2.5e-12
Xelaev18021145m	-1.6622	0.0481024	caprin2.S	1.36727	4.61e-06	pnp.L	2.02211	0.00145698	bcorl1.S	2.64295	2.27e-32	LOC108708640	3.48008	0.00350482
plxna4	-1.67964	0.00746805	myl9.L	1.36586	0.000594147	LOC108700909	2.0158	0.036426	wasf3	2.64144	1.65e-06	arhgef28.S	3.47993	2.26e-08
Xelaev18001991m	-1.69341	0.00592375	cyp27a1	1.36567	0.0040245	MGC147188.L	2.01233	0.0230957	foxi4.2.L	2.64076	8.22e-08	ston2.L	3.4606	8.69e-06
LOC108695513	-1.69465	4.22e-05	parp9.L	1.36235	0.0251867	meis3.S	2.012	0.00296832	cnfn.1.L	2.63712	1.25e-06	dnase1l2.L	3.46038	0.00431926
pigw.S	-1.69477	0.0034266	tat.S	1.36077	0.00412578	gfod1.S	2.00832	5.75418e-10	syn1.S	2.63605	3e-06	loc100497729.L	3.4603	1.78e-19
LOC108715896	-1.69894	0.0415378	hap1.L	1.36048	0.004991	zfp36l1	2.0079	3.49069e-14	tuba1cl.2.S	2.63578	3.01e-15	kitlg.L	3.4573	7.69e-32
lpar2.L	-1.70743	1.45e-11	LOC108718445	1.3585	0.0270166	tmem238	2.00738	1.48493e-06	pdxdc1.L	2.63076	4.36e-11	slc9a5.L	3.45574	0.00144768
hes7.2.L	-1.71211	0.00129973	slc7a4.L	1.35556	1.87e-07	prpsap1.S	2.00576	3.39436e-10	xylt2.S	2.62478	3.31e-08	ccno.L	3.45172	6.63e-08
zswim4.S	-1.71707	0.00358643	fut1.L	1.35504	0.00878081	aldh1l1.L	2.00252	4.92298e-06	plekhg7.S	2.6181	1.73e-25	ifnlr1.L	3.4463	4.51e-07
LOC100158321	-1.72894	0.0126417	Xelaev18022168m	1.35433	0.0399524	atp6v1c2.L	2.00105	0.000215739	dyrk3.L	2.61372	2.23e-13	rabgap1l.L	3.44581	1.07e-27
crx.L	-1.73353	0.0230083	scn1b.S	1.3518	0.0182225	rgl1	2.00024	0.0321336	ablim1	2.60793	3.32e-23	erbb3.S	3.44513	1.03e-07
rap2b.S	-1.7516	1.91e-12	mgc75753.S	1.34765	0.000420345	sox3.S	1.998	0.000102714	slc16a12.L	2.6069	0.00560762	slc9a2	3.44394	1.18e-09
myo1e	-1.77012	0.00276288	MGC114621	1.3432	0.027198	LOC108713828	1.99674	0.000571621	krt16.L	2.59895	0.0114813	kcnh3.L	3.4433	0.0045936
LOC108704627	-1.77394	1.13e-05	c15orf39.L	1.34279	1.36e-09	cbfa2t2.L	1.996	0.000254929	abcg2.S	2.59725	9.57e-18	ndnfl1.1.L	3.44043	0.000314153
lrriq3.S	-1.78395	0.0227409	cks1b.S	1.34105	0.00111327	vangl1.L	1.995	1.63126e-09	Xelaev18002449m	2.5947	0.0418821	fam195a.L	3.43241	1.62e-07
fam184a.L	-1.79507	0.0294067	cdk1.L	1.33968	3.33e-05	bmp7.2.L	1.9848	1.29794e-34	dip2a	2.58858	2.08e-27	tgfb1.L	3.43219	0.0138438
ubald2.L	-1.79507	0.000631537	f2rl1.L	1.33919	4.02e-08	twsg1.S	1.98142	1.30968e-10	Xelaev18001309m	2.58549	8.86e-07	stard10.S	3.43164	5.72e-11
fam212a.L	-1.79648	0.00198123	sox2.L	1.33552	0.00203782	gprc5c.S	1.98008	8.89236e-09	slc16a12.S	2.58522	2.96e-13	fam3b.L	3.43098	5.82e-32
LOC105945479	-1.80096	0.00297341	rab11fip2.S	1.33334	2.29e-05	zfp36.S	1.97963	0.00121476	dnajb14.S	2.58423	3.12e-11	spry4.S	3.4277	3.92e-06
vegt.S	-1.81864	0.000781594	elp6.L	1.33209	0.00011732	cdk5rap3.L	1.97927	0.0222071	gpr143.S	2.58412	0.000209611	tmem265.S	3.42722	0.00019308
sox17b.1.S	-1.81926	0.0161886	pam16.S	1.33164	0.000279223	fkbp11.S	1.97457	0.0464394	LOC108704510	2.58112	2.42e-07	pkp3.S	3.42581	2e-25
Xelaev18043506m	-1.82329	0.00996718	hexim1.L	1.33155	1.67e-08	hap1.S	1.97011	4.7837e-07	bmp4.S	2.57914	3.04e-41	vill.L	3.42352	1.53e-18
Xelaev18040086m	-1.83533	5.16e-06	LOC108704304	1.33118	0.00381329	als2cl.L	1.96977	6.27577e-06	grwd1-b	2.57841	1.19e-06	itpr3	3.42089	5.17e-16
LOC108700779	-1.85064	0.000705456	snn.S	1.32992	6.91e-05	efna4.L	1.96862	3.72337e-11	syt16.L	2.57634	0.000214888	dusp10.2.L	3.41591	0.00285393
rgmb.S	-1.88197	0.000874279	cfb.L	1.32849	0.0301552	skida1.L	1.96812	0.00564991	kiaa1324l.L	2.56238	2.96e-19	LOC108712963	3.41042	1.35e-12
t2.S	-1.88669	0.0438512	rgcc.S	1.32522	0.00171377	rabgap1l.L	1.96735	1.80959e-09	upk1b.L	2.56124	1.12e-33	tnfrsf11a.S	3.40681	4.19e-10
sema4a.L	-1.88731	1.05e-06	ackr3.L	1.32053	0.0250811	sbk1l.S	1.96442	0.000367825	podxl	2.56108	0.0317391	fer1l4	3.40605	6.68e-13
sox18.L	-1.8889	0.0464102	cnn1.S	1.32016	0.00171377	fkbp9.L	1.96136	0.00449878	kalrn.L	2.55836	3.86e-09	Xelaev18046781m	3.40468	4.59e-05
pde4a.S	-1.88902	0.0225082	pou5f3.2.L	1.31757	5.38e-05	hes6.1.L	1.95751	1.88884e-06	myo5b.L	2.54855	1.28e-09	ccser2.S	3.40356	1.31e-19
ervfrd-1	-1.91669	0.0452697	fzd10.L	1.31704	0.0232802	pgr.L	1.95605	0.0107211	LOC108699389	2.5475	0.0337197	ppt1.S	3.40251	1.85e-17
ahnak.S	-1.93718	5.18e-05	LOC108716539	1.31677	0.00931041	LOC100487499.S	1.95379	0.000843762	acsl3.L	2.54741	5.41e-18	Xetrov90015502m.L	3.40003	0.0263406
cdx2.L	-1.94737	0.0149496	fosl2.S	1.31649	0.0156781	zfp36l1.L	1.94921	6.77738e-08	fndc10	2.54694	0.00338881	trim16.S	3.39976	0.000364072
itgb8.L	-1.98498	0.013725	apela	1.31596	0.000268856	pou2f3.L	1.94815	0.000668842	nr1i3.S	2.54636	5.63e-12	capns1.L	3.39905	5.96e-14
nuak1	-2.00653	1.86e-05	pde4a	1.31571	0.0487989	lox.L	1.94656	0.0189859	gprc5c.L	2.54358	9.29e-08	krt18.3.S	3.3955	3.9e-09
lrrc19	-2.01124	0.0204868	tnk2l.L	1.31011	0.000260035	fam195a.L	1.94544	7.40176e-19	vangl1.S	2.54255	4.42e-10	nrarp	3.39491	1.93e-19
ca14.S	-2.01703	0.0103362	sp6.L	1.30967	0.0231359	LOC108718087	1.94492	0.000697711	prss23.S	2.54219	0.00841273	arg1.L	3.38602	2.1e-21
lrit1	-2.02546	0.00294955	tmem238	1.30948	0.00196609	ppt1.S	1.94337	1.90227e-06	zhx2	2.54162	5.85e-43	atp1b2.S	3.38379	4.64e-18
LOC108695383	-2.07204	0.0283567	LOC108707041	1.30839	0.0197456	rgma.L	1.94146	2.7575e-06	vasn.S	2.53888	0.00255033	trabd.S	3.37596	6.13e-16
LOC108706156	-2.108	0.000703254	LOC108716538	1.30833	0.0134012	nedd9.L	1.94059	9.63656e-06	tbc1d30.L	2.5362	1.28e-14	arhgap40.L	3.37389	0.000814161
tmem67	-2.1225	0.049242	rpe65.S	1.3058	0.00810512	kifc3.S	1.93842	5.81804e-06	myt1.S	2.5303	7.73e-17	sp7.S	3.36954	1.94e-40
spry3.S	-2.14017	0.0493662	Xelaev18041793m	1.30153	0.00137472	mrpl3.L	1.93676	0.00154005	krt5.7.L	2.53009	2.42e-22	cxcl16.L	3.3666	0.0229497
drc7	-2.14252	0.0102379	cnr2.S	1.29893	0.0314366	Xelaev18018096m	1.93173	0.00579546	ccdc125.S	2.52855	5.85e-06	slc17a9.S	3.36479	9.56e-08
sp8.S	-2.17614	0.00129973	sbk1.L	1.29738	0.0136292	ifnlr1	1.92987	0.000148659	gmppb.L	2.52806	2.06e-33	atp13a-like.S	3.36009	1.64e-09
lrig3.S	-2.17736	3.17e-09	gfod1.S	1.29733	0.00287954	sds.L	1.92754	1.57696e-05	p2ry2.S	2.52721	0.000232627	arid3a	3.35899	2.4e-09
gpr160.S	-2.19477	0.00194652	trpm4	1.29726	0.0455677	otog.L	1.92643	0.00263407	slc19a2.L	2.52584	3.18e-14	slc33a1.L	3.35815	2.16e-18
prkcd	-2.21556	1.29e-08	wdr4.S	1.29688	0.000247281	hes6.1.S	1.92577	7.22033e-08	atf3.S	2.52476	9.06e-05	gnaz.S	3.35631	0.00445068
mafb.S	-2.23177	2.78e-05	prickle2.L	1.29419	0.000444977	LOC108698217	1.92571	0.000131177	pmm2.L	2.51094	9.83e-19	tp63.L	3.35115	0.00156103
kif5c.S	-2.23259	5.24e-07	qdpr.S	1.29264	0.0331376	LOC108706234	1.91955	1.56772e-08	rhog-like.1.L	2.51055	6.7e-23	osbpl2.L	3.35049	4.23e-18
fgf8.L	-2.23337	0.0010003	LOC108699475	1.28589	8.41e-05	slc35c1.L	1.91568	2.31528e-12	LOC108708101	2.50551	0.00369715	p2ry11.L	3.34537	1.06e-11
shbg	-2.24345	0.00477391	nr2f6.L	1.28553	0.00347129	lmcd1.S	1.9146	0.0112697	nox1	2.5039	0.00427508	Xelaev18015466m	3.33877	0.0107087
mig30.L	-2.25588	3.96e-05	apln.L	1.28459	0.000832229	cdknx.L	1.91426	3.99646e-09	gipc1	2.50229	0.000856548	gas2l1.L	3.33473	4.23e-20
urgcp	-2.2646	0.00872824	cdca3.L	1.28458	3.8e-05	mex3b.S	1.91169	2.78932e-05	tiam1.S	2.49911	4.23e-23	gopc.L	3.33242	5.5e-14
akna.S	-2.2664	0.00277423	tmem263-b	1.27979	0.0204798	cecr2.S	1.9112	4.78452e-05	theg-like.S	2.49884	0.0467646	slc25a37.L	3.32973	0.00105987
hes7.2.S	-2.26877	0.00804264	tsc22d3.L	1.27912	0.0193822	stard10.S	1.9061	3.46442e-05	stx19.L	2.49867	8.85e-45	nr1d1.L	3.32518	3.32e-06
nek6	-2.27152	1.52e-08	irf9.S	1.27633	0.000758992	rcn3.L	1.90349	0.00126827	Xelaev18012620m	2.49204	0.0267793	slc19a2.L	3.32355	4.28e-32
fbxo46.L	-2.27965	9.9e-05	Xelaev18036390m	1.27167	0.00114028	slc29a3.L	1.90178	0.000378209	vrk1.L	2.48623	0.00297138	pvrl3.S	3.32269	3.26e-06
efnb2.S	-2.31435	2.43e-07	btbd10.S	1.26892	1.65e-05	irf5.S	1.89964	0.00600238	casq1	2.48525	0.000492456	gbx2.1.L	3.31708	1.58e-12
ccdc181.S	-2.31546	0.000201284	ptma.L	1.2672	6.32e-07	slc16a12.S	1.89725	2.28557e-05	zfp36l1	2.48421	8.55e-30	syt16.L	3.31547	5.3e-15
ATP8	-2.316	0.00205906	LOC108714379	1.2648	0.0117311	crabp2.L	1.89712	6.12953e-06	vgll4l.S	2.48381	1.46e-38	grem1.L	3.31209	1.51e-05
LOC108698804	-2.31623	0.0475961	mpzl2.L	1.26341	0.000423159	zbtb46.S	1.89677	7.87222e-05	rnf222.S	2.48304	8.53e-34	LOC100488626.L	3.31136	0.0169813
clip2.L	-2.33576	2.32e-08	gpt2.S	1.26145	3.82e-05	march8.S	1.88569	0.00218295	xk81a1.L	2.48258	2.53e-14	ahsa1.L	3.30038	1.11e-13
gs17.S	-2.33953	2.17e-06	upk1b.L	1.25672	8.92e-08	foxj1.S	1.88507	1.84112e-05	osbpl2.L	2.475	5.02e-20	dlx6.S	3.29812	8.11e-18
sox17a.L	-2.3472	2.45e-05	tdgf1.3.L	1.25368	2.02e-10	foxf1.L	1.88332	0.0290551	kxd1.S	2.47174	0.000131669	arpc1a	3.29696	0.00201099
adora2a.S	-2.34776	0.0349518	cldn6.S	1.2523	0.00265662	slc44a3.L	1.88292	0.000312952	lgalsl.L	2.46741	2.43e-15	fam3c.S	3.29548	1.95e-23
colgalt2.S	-2.34809	0.028455	lsr	1.25225	0.010983	LOC108717642	1.88291	0.0013489	rbm47.L	2.46643	6.45e-24	c11orf1.L	3.29465	0.0298802
pou3f1.L	-2.35484	0.000220429	nagk.L	1.25212	0.00461299	LOC108709519	1.87864	1.0197e-05	pias2.L	2.46237	0.000103641	esr-5.L	3.29372	6.1e-08
rapgef3.L	-2.37904	0.0439935	dhrs3.S	1.25183	0.00195625	Xelaev18030798m	1.87732	0.00175628	zfp36.L	2.45772	2.94e-10	Xelaev18011003m	3.28431	0.00483139
slc39a8.L	-2.3861	0.00222491	hist2h3c.L	1.24992	0.00828074	sh3gl3.L	1.87726	0.0401178	tead4.L	2.45499	2.4e-17	myo5b.S	3.27927	1.02e-07
Xelaev18002673m	-2.40348	0.000173526	slc25a29.L	1.24808	0.0212141	gas2l1.S	1.87509	2.44197e-07	cbr1.1.L	2.4471	0.000508077	p2rx2.S	3.26711	0.0108703
sel1l3.L	-2.42055	0.0429292	map3k8.L	1.24672	0.000165514	shroom3.L	1.8745	3.85609e-07	tcp1.S	2.438	1.75e-18	ccdc129.L	3.26679	6.45e-08
Xelaev18038298m	-2.42084	0.0386464	zyx	1.2448	0.00893983	slc25a25.S	1.87337	3.66893e-11	epas1.S	2.43692	1.04e-22	hspa13.L	3.2638	1.77e-18
areg.S	-2.44052	0.0263613	cldn4.L	1.24434	1.4e-06	hyal2.S	1.87318	1.48279e-12	LOC108706106	2.43686	0.00984071	cul5.S	3.25717	0.048229
lzts1.S	-2.45096	0.0429292	hes6.1.S	1.24166	0.000140717	hpgd.S	1.87273	2.76524e-05	chsy1.L	2.43372	3.17e-11	hoxd1.S	3.25463	5.19e-11
tril.S	-2.51512	0.0144665	h2afx.L	1.24112	9.71e-05	tat.S	1.87181	4.49327e-05	arhgap40.L	2.43357	0.0312184	post.L	3.24147	2.97e-15
MGC52759	-2.532	0.0044512	mrpl9.L	1.23945	0.000844084	tbx2.L	1.86965	0.019446	p2rx1.L	2.42332	0.0482294	LOC108719446	3.23707	0.00797994
ptpro.L	-2.55187	0.00276288	sema6d.S	1.23605	7.09e-07	traf4.L	1.86334	1.71368e-07	klf11.S	2.42098	1.86e-11	hexd	3.23598	1.74e-21
zbtb18.S	-2.55291	1.05e-11	klf10.L	1.23494	0.0094755	chrna2.L	1.85962	2.86565e-08	hspb7.L	2.42038	4.43e-05	slc35a3.2.S	3.23456	9.76e-18
LOC108700092	-2.55308	0.00317172	cks1b.L	1.23382	6.76e-05	fzd10.S	1.85588	0.0488742	gfod1.S	2.41954	1.7e-05	pnck.S	3.23393	0.000258302
fgf8.S	-2.56322	0.000478572	fam83b.S	1.23376	0.00883032	dll1.S	1.85298	7.84535e-06	casp7	2.41839	1.89e-05	rgl1	3.23384	0.000131885
p2ry11.S	-2.58368	0.0295142	post7p.L	1.23223	0.0140894	sst.2	1.85152	0.041249	tnfrsf10b.L	2.41625	0.00129977	Xelaev18003778m	3.22844	0.0219525
plekhg5.S	-2.59211	3.11e-05	tfap4.L	1.23	0.000183281	herpud1.S	1.84932	4.12596e-08	trim68	2.41085	0.0118353	tmem56.L	3.22594	4.02e-07
Xelaev18012936m	-2.59934	0.031605	zfp36l1.L	1.22962	0.000902202	uts2r	1.8474	0.00198327	LOC108700281	2.40941	4.56e-10	tuba1cl.3.S	3.22331	2.03e-09
numbl.L	-2.60946	1.04e-11	ankrd50	1.22929	0.00831229	znf238.2.L	1.84558	1.72863e-08	rundc1.S	2.40819	2.25e-07	smtnl1	3.22326	2.95e-06
ell3.S	-2.61734	0.0440161	nme2.L	1.22499	0.0155125	smad6.2.L	1.84536	0.00657962	scnn1a.L	2.40817	1.46e-12	erbb3.L	3.22263	5.13e-07
Xelaev18008018m	-2.63162	0.00999307	zfp36l1.S	1.22384	2.39e-05	ahsa1.L	1.84397	1.03568e-05	sema3f.L	2.40388	3.68e-24	klf4.L	3.22186	4.75e-11
mertk.L	-2.63388	0.0107943	cox4i2.S	1.22216	3.77e-06	abcg2.S	1.84246	2.48211e-06	Xetrov90008961m.L	2.40171	0.00305388	inpp5a.2.L	3.21926	8.18e-06
Xelaev18000237m	-2.63494	1.83e-06	c17orf49.S	1.22094	0.00143767	pros1.S	1.83905	0.00596633	rasef.S	2.39876	4.14e-09	myb.L	3.21737	4.81e-06
Xelaev18028211m	-2.64321	0.0300916	esrp1.S	1.22022	0.00429856	tmem263-b	1.83561	3.97127e-07	iqsec3.S	2.39815	0.0245044	dlx6.L	3.21707	0.00147043
hdac11	-2.64763	0.00199212	snta1.S	1.21978	0.00351451	egln3.S	1.83391	2.71503e-05	sptssb	2.39789	1.45e-05	ckap4.S	3.21691	3.19e-41
cdc14a.L	-2.67978	0.0440552	b4galt5.S	1.21961	0.00568457	napb	1.83339	0.000310563	rnf152	2.39608	0.0195791	scnn1a.S	3.21519	5.66e-21
lrrc36.L	-2.69549	0.000217011	traf4.L	1.21522	0.0238713	tuba1cl.2.S	1.8312	3.03293e-12	amotl1.S	2.3899	2.62e-16	Xelaev18040671m	3.21366	0.0404649
c17orf58.L	-2.69852	0.000582395	blcap.L	1.21295	0.00010842	ccnb3.L	1.83038	2.54919e-11	LOC108699863	2.38785	1.35e-18	nbeal2.L	3.21342	2.28e-06
LOC108701008	-2.70242	0.00067978	ccnb3.L	1.21212	0.00115414	hs3st1.L	1.82854	0.00637952	dlx5.L	2.38744	1.46e-11	LOC108700229	3.21298	2.31e-05
hoxc12.S	-2.72033	0.0144665	fbp1.L	1.21039	0.0048164	LOC108716948	1.82688	0.000583039	chrna2.L	2.38263	2.09e-08	Xelaev18002226m	3.20579	1.21e-06
Xelaev18004563m	-2.72799	0.0117382	LOC108702843	1.21005	0.0151306	slc22a5.L	1.82574	1.53037e-09	esr-5.S	2.38021	1.81e-06	proca1	3.20482	0.000260512
Xelaev18009885m	-2.73318	0.0003668	apoc1-like.L	1.20764	0.0031064	plekhg7.S	1.82239	4.47175e-10	Xelaev18038969m	2.37497	2.56e-07	kcne5.S	3.2016	0.0050573
dhx58.L	-2.75294	7.79e-14	ras-dva1.L	1.20742	0.0112628	gpsm2.L	1.81767	5.52028e-07	ptger4.L	2.3748	5.54e-10	pprc1.L	3.19985	1.77e-43
lrrc15.S	-2.75859	0.0288067	rgma.L	1.20353	0.00660728	otud1.S	1.81472	3.15014e-11	LOC108698139	2.37199	0.0258463	galnt6.1.S	3.19113	1.98e-10
prr5l.L	-2.7678	0.00267061	bmp7.2.L	1.20261	1.35e-08	cdkn1a.S	1.81126	0.0212624	fam83a.S	2.36718	0.00037571	slc25a27.L	3.18505	0.000469983
shox2.S	-2.77854	0.00065229	nubpl.L	1.20242	0.0126265	LOC108700979	1.80538	0.0162596	tnfrsf11a.S	2.36554	0.000166597	aldh1l1.L	3.18081	1.04e-16
slc3a2	-2.78162	0.00813585	has-rs.S	1.201	0.000194326	LOC108702448	1.80213	3.17308e-05	chst9	2.36509	4.51e-11	mgat4c	3.17956	5.18e-06
eng	-2.81052	0.0438512	celsr1	1.19959	0.0116643	LOC108706875	1.80131	1.26937e-05	LOC108717259	2.36252	0.00162636	prr18.L	3.17949	0.000924004
nrp2.S	-2.82212	0.0429292	psma1.S	1.19675	0.0107212	sik1.S	1.8007	0.0151616	bicd1	2.3621	6.93e-06	tuba1cl.2.S	3.17783	4.72e-06
nptx2.S	-2.8348	0.0020478	LOC100191024	1.19408	0.00205974	hapln3.L	1.79528	9.63336e-05	atp6v0d2.L	2.36066	0.0306507	plaur	3.17752	3.09e-05
b4galt1	-2.83582	0.00999307	LOC108705281	1.19089	0.0112137	MGC52827	1.79223	8.47236e-05	cmtr2.L	2.3575	1.79e-12	ralgps1.S	3.17649	1.06e-05
LOC108698417	-2.83634	0.000902785	med9.L	1.18487	0.00230185	hap1.L	1.79161	2.97713e-08	sst.2	2.35538	0.00640219	vtcn1	3.17547	1.93e-10
tnfsf15.S	-2.83798	0.0128654	herpud1.L	1.18344	9.48e-05	LOC108698396	1.79042	3.85609e-07	chd3	2.35189	1.08e-14	glb1l2.S	3.17344	3.01e-10
pif1	-2.84222	0.0334145	ssbp1.S	1.18311	0.0122805	ptgs2.S	1.78987	7.51238e-09	adam28.1.L	2.35054	0.00418307	sgsm3.L	3.17014	7.87e-18
loc495835.L	-2.84298	0.0227409	gpsm2.S	1.17911	1.77e-08	osbpl2.L	1.78401	2.35758e-11	loc100497729.L	2.34974	2.14e-08	lamb1.S	3.16329	1.56e-09
snai1.L	-2.85127	9.3e-05	paaf1.S	1.17888	0.000119271	sox18.S	1.78247	0.00313452	hspa5	2.34798	8.1e-13	kiaa1324l.L	3.1493	2.65e-14
sncb.L	-2.8674	0.000120242	meis3.L	1.1781	0.0408942	LOC108702824	1.78154	0.0331506	fosl2.L	2.34373	1.15e-08	myc.L	3.14657	2.37e-40
bix1.3.S	-2.86878	0.0404034	LOC108706721	1.17503	0.0222278	gpatch4.S	1.78125	0.000235299	LOC108711517	2.34209	5.68e-14	LOC108706234	3.14539	3.91e-13
myb.S	-2.89326	0.00223552	bcl2l12.S	1.17499	0.0438627	ankdd1b.S	1.78109	0.0124962	Xelaev18039754m	2.33418	3.54e-11	Xelaev18028743m	3.14417	0.000254999
ptgs1.S	-2.89877	0.0214295	sox21.L	1.17389	0.000294504	chst9	1.78005	5.94596e-06	LOC108702079	2.33126	0.000179263	LOC108709394	3.14347	8.33e-18
LOC108706492	-2.90488	0.00289714	hexim1.S	1.17204	0.000260035	loc100487575.L	1.77813	0.0119417	Xelaev18046781m	2.3254	0.00158984	LOC108708101	3.14215	3.52e-08
six2.S	-2.92142	0.0013093	tmem79.L	1.17201	0.000497095	slc26a9.S	1.77173	0.00462922	arl4c.S	2.32498	6.44e-13	tshz1.L	3.13976	0.00151922
efnb2.L	-2.92836	4.36e-11	chst2.L	1.16937	0.000138111	itpkb	1.77067	1.33199e-07	mansc1	2.32418	6.04e-21	plekha8.L	3.13928	2.57e-07
dhcr7.L	-2.93865	1.69e-06	fzd2.S	1.16704	0.00501348	sptssb	1.76944	0.000286769	ier5l.L	2.32388	9.29e-19	anxa11.L	3.13542	0.00228756
Xelaev18018970m	-2.93972	1.44e-05	sf3b5.S	1.1626	6.26e-06	neurl1b.L	1.76928	0.000401668	pde9a.L	2.31985	0.0178992	tfap2a.S	3.1343	1.01e-08
LOC108702204	-2.94003	1.1e-06	gstt1.L	1.1575	0.0306916	park7.L	1.76464	0.000247627	LOC108702843	2.317	6.37e-08	ccser2.L	3.1247	1.4e-09
catip.L	-2.94216	0.0300916	loc100049121.L	1.15611	0.0242007	capn8.1.S	1.76393	0.0210823	xk.L	2.31255	0.00111655	birc7.S	3.1181	0.000781986
LOC108705598	-2.9425	0.0187962	atp6v1d.L	1.14868	0.028832	sh3d21.L	1.76262	6.86134e-07	gas6.L	2.30971	2.17e-11	galnt5.L	3.11628	0.00440753
pigz.L	-2.94386	0.000227751	coa4	1.14386	0.0395464	Xelaev18039754m	1.76256	4.24791e-05	LOC108715890	2.30853	0.000902785	LOC100127337	3.11191	1.05e-05
dnase1l3	-2.95238	1.72e-05	fam212a.S	1.14359	0.004445	cep57.S	1.76103	3.28998e-05	nedd9.L	2.30664	3.3e-19	cnfn.1.L	3.11107	4.47e-08
foxa1.S	-3.00925	6.67e-14	rps10	1.14128	0.0214428	upk1b.L	1.76065	2.25765e-10	galnt12.L	2.30617	0.000457005	xbp1.L	3.09786	4.41e-10
khnyn.S	-3.01293	0.0390906	srsf7.S	1.1375	1.18e-12	ttll1.S	1.75953	0.00241886	gas2l1.S	2.30556	3.24e-05	krt8.2.L	3.09634	4.23e-06
LOC108696704	-3.01375	0.0121321	osbpl2.L	1.13283	0.0029938	cysrt1	1.75844	1.66511e-26	elmod2.L	2.3055	1.03e-12	slc2a12.L	3.09507	7.63e-05
arhgap39	-3.01939	3.22e-15	dck.2.L	1.13164	0.000332935	bmp4.S	1.75806	1.48655e-10	znf238.2.L	2.30159	4.51e-22	frk.L	3.09499	1.48e-05
eomes.S	-3.02623	0.049242	polr3gl.L	1.13099	0.0268982	rasd1.L	1.75456	3.69272e-11	sik1.S	2.30157	0.000119076	camkv	3.09406	4.86e-06
Xetrov90015528m.L	-3.0321	6.69e-10	sra1.L	1.12398	1.61e-07	ap1m2.L	1.75304	2.92022e-11	acvr1b.L	2.30128	2.11e-14	herpud1.S	3.09297	1.87e-14
LOC108718316	-3.03908	7.86e-06	rplp1.L	1.11789	0.0135556	grwd1-b	1.75302	0.0135662	LOC108698102	2.30107	0.019011	Xelaev18036730m	3.09252	0.00534018
krt15	-3.05205	0.000386135	phldb3.L	1.11596	9.71e-05	LOC108698113	1.75276	6.03064e-09	ckap4.S	2.29106	1.36e-26	klf17.L	3.09227	3.03e-14
ablim1.S	-3.05346	0.000184784	mettl21a.S	1.11368	0.00019825	c17orf97	1.74998	0.00937347	tjp3.S	2.29035	2.77e-18	ptger4.L	3.09137	1.1e-05
tuft1.L	-3.06914	0.00214863	plekhg7.S	1.11359	0.00171377	sox15.L	1.74697	1.8857e-06	atp6v1c2.L	2.28881	0.000144753	mid1ip1.S	3.08531	4.15e-15
LOC100492708	-3.08353	7.57e-06	drosha.L	1.11333	0.0214216	pip4k2b.L	1.74334	0.0238044	ccdc71l.L	2.28751	4.04e-10	hes6.1.S	3.08458	3.01e-15
gata2.S	-3.09986	0.00360654	ncoa2.L	1.11313	0.00342382	LOC108719412	1.74322	0.018082	tstd1.S	2.28731	3.92e-06	gmppb.L	3.08317	2.3e-26
gsc.S	-3.1209	1.08e-05	trdmt1.L	1.11248	0.0204798	bcl2l12.S	1.74257	0.000468484	shroom4.L	2.28711	6.1e-20	als2cl.L	3.08115	1.32e-05
adra2c.L	-3.12453	0.00774699	msto1.L	1.10743	0.0201287	abcb1	1.74028	1.14868e-05	rassf10.L	2.28709	2.44e-05	fzd3.S	3.08031	4.98e-20
znf665l.S	-3.12481	0.0426216	MGC81882	1.10704	0.00600495	LOC108699241	1.73696	0.000268719	bmp4.L	2.28686	8.49e-26	fam83a.S	3.07999	6.95e-06
Xelaev18001619m	-3.17198	1.26e-13	mcat.S	1.10555	0.0274461	cmtr2.L	1.73639	1.06967e-11	paqr5.S	2.2867	0.00649373	acsl3.L	3.07697	2.09e-21
slc28a2.L	-3.17866	0.0150819	hes3.1.L	1.10509	0.0108681	hey1.S	1.72393	0.0168378	akr1c2.L	2.28454	0.0339477	pcdh20.L	3.07203	0.000319274
hsd11b1l.L	-3.17926	0.000124196	qdpr.L	1.10277	0.00474796	trpv2.L	1.71911	0.0119862	loc108648340.L	2.2839	7.08e-06	fam101b.L	3.06653	2.39e-06
LOC101733813.1	-3.17927	2.09e-07	spr.L	1.10138	0.000996494	gdi1.S	1.71853	0.0133922	rock1	2.28341	4.95e-16	ttc39a.L	3.06378	2.35e-08
Xelaev18034666m	-3.18037	0.013571	il17rd.L	1.09913	1.47e-05	rab27a.S	1.71759	0.0314717	camsap3.L	2.28275	4.98e-17	sst.2	3.06248	0.00114062
gabarapl1-b	-3.18945	6.46e-06	scrn3.L	1.09871	0.0172057	scn1b.S	1.71657	0.0150119	gtf3c4.L	2.2794	3.7e-14	picalm.1.S	3.06217	3.26e-17
bix1.3.L	-3.20641	0.0364068	tp53inp1.S	1.09776	5.43e-05	stard13.L	1.71228	0.00335963	plekhg3.L	2.27287	7.05e-14	map3k19.L	3.0618	0.00364365
Xelaev18004914m	-3.20909	0.0390487	MGC132236	1.0965	0.000182489	apln.L	1.71137	0.00270141	prss8	2.27274	1.62e-07	upk3b.L	3.05485	1.06e-18
moap1.L	-3.22608	0.00746174	atp6a1	1.09599	0.0152884	camsap3.L	1.70926	1.92462e-11	hs3st6.L	2.27225	0.0177768	xylt2.S	3.05446	8.15e-09
hsf3	-3.23426	0.028335	ddx28.L	1.09258	9.03e-06	bcor.L	1.70789	0.000960996	c10orf88.L	2.26994	9.52e-14	Xelaev18036390m	3.04305	1.73e-16
syne3.S	-3.23451	1.11e-05	mrpl27.L	1.09181	0.022569	hist1h4d.L	1.70495	0.0145034	sox18.S	2.26488	1.75e-07	olfml2a.S	3.02483	0.00530366
pdgfra.L	-3.24311	9.42e-14	loc728026.L	1.08997	5.4e-06	nt5c3a.L	1.70257	0.00491681	tbc1d31.L	2.26449	1.18e-17	rundc1.S	3.01993	1.06e-11
pou3f1.S	-3.24683	0.00294277	mad2l1bp-like.L	1.08759	0.000108627	Xelaev18041793m	1.70208	0.00609578	sbk1.L	2.25876	5.05e-11	srprb.S	3.01882	5.28e-12
bix1.2.L	-3.25528	0.0410359	esrp1.L	1.08729	9.56e-05	b3galt5	1.70136	0.0380233	LOC108710961	2.25679	0.0122588	kcnj15.L	3.01684	3.29e-10
cd80.L	-3.26453	0.0246027	h1foo.S	1.08578	0.00691969	camkv	1.69332	0.00468395	frk.L	2.24746	0.0329731	krt8.2.S	3.01329	0.000174991
ccndx.S	-3.27514	0.033818	znf268.L	1.08067	0.000806447	tmem101.S	1.69265	1.43031e-05	rnf144b.L	2.24476	0.000630811	sema3f.L	3.00968	1.21e-18
pnck.L	-3.28328	0.000348722	rpl36.L	1.08038	0.00600301	rnf144b.S	1.69171	0.000533765	rbm38.L	2.24409	1.08e-09	eps8l2.S	3.00526	7.06e-15
emx1.2.L	-3.31319	0.00507532	mknk2.S	1.07631	1.81e-06	map2k6.L	1.68322	2.87363e-05	Xelaev18005230m	2.24217	1.39e-19	muc5b	3.00393	4.01e-41
nfkb1.L	-3.36266	0.00265259	cldn4.S	1.07475	0.0363498	acsl3.L	1.68242	6.7164e-10	LOC108716050	2.24065	0.00274362	zbp1.L	3.00119	0.0150012
LOC108702593	-3.36587	6.4e-18	midn.L	1.07345	0.00164204	sft2d3.S	1.68003	0.0013916	LOC108704223	2.24038	0.0101797	igsf9.S	2.99516	1.18e-07
LOC100488701.S	-3.3843	0.045164	fam162a.S	1.07256	0.000159474	lsp1.L	1.67764	0.00645964	tada2a.L	2.23897	1.05e-06	sptssb	2.99244	6.19e-08
vgll3.L	-3.38657	3.91e-06	otud1.L	1.07243	0.00766381	sept5.L	1.67737	0.020351	aacs.S	2.23387	6.73e-05	ptger4.S	2.99195	1.98e-16
slc2a1.L	-3.41595	8.16e-11	ptgs2.S	1.0723	0.00341024	arhgap33.L	1.67632	2.69787e-06	oxr1.L	2.23298	1.97e-12	tpbg.L	2.98943	4.23e-08
nrip3.L	-3.42383	0.00979639	zfp36l1	1.06923	6.32e-05	LOC108708780	1.67453	0.0467894	tuba1a.L	2.23194	3.92e-06	kifc3.S	2.98782	1.5e-07
snai1.S	-3.42566	9.18e-52	zyx.S	1.06746	0.00271402	cdk1.L	1.67446	1.49719e-07	sox3.S	2.23111	4.61e-07	foxq1.L	2.98269	0.00324427
plk3.L	-3.42668	1.21e-32	gmppa.L	1.06623	0.00154644	mdm2.L	1.67349	0.0163586	s100g	2.22912	6.36e-07	theg-like.S	2.98215	0.0318966
lefty.S	-3.4354	0.0267647	htatip2.L	1.06573	0.000180645	LOC108711517	1.6701	0.000481984	nufip2.S	2.22659	1.04e-13	hoxd1.L	2.98074	5.36e-08
ffar4.S	-3.43607	0.00718258	eif4a2.L	1.06451	0.00795266	LOC108718667	1.66573	0.00184583	napb	2.22583	1.86e-07	esr10.S	2.98054	1.03e-08
xdh.S	-3.43919	6.09e-09	tubb4b.L	1.06054	0.00456324	kiaa1324l.L	1.66431	1.49168e-05	pdcd11	2.22558	0.000703734	cxcl12.L	2.98026	2.3e-06
st6gal1.L	-3.44522	5.4e-05	sema4c.S	1.05911	0.000115938	ventx1.2.S	1.66044	0.00193656	fgd4.S	2.22516	1.3e-06	Xelaev18005376m	2.9798	0.0149493
LOC108718937	-3.44719	0.0275851	elf1.S	1.05702	0.0151485	LOC108701721	1.65767	5.33168e-06	cenpn.L	2.22475	1.73e-20	tjp3.S	2.97934	1.01e-12
muc4	-3.453	0.000180912	itpkb	1.05372	0.0235998	cdx1.S	1.65361	0.00940405	gng13.S	2.22418	0.0324065	dlc.L	2.97905	2.06e-07
fzd8.S	-3.46675	3.68e-18	rell1.S	1.05203	0.000296172	pkn1.L	1.65094	5.7072e-08	osbpl2.S	2.2236	3.26e-14	hspb7.L	2.97774	7.64e-06
LOC108713440	-3.4708	0.0328714	mdk.L	1.05195	0.00035743	id3.S	1.64982	4.24719e-07	rasgrp1.L	2.22297	1.1e-05	cat1.L	2.97191	6.68e-05
hoxc10	-3.47404	0.00374145	tmcc3.L	1.05181	0.0256408	ankrd50	1.64949	0.000180124	Xelaev18000477m	2.22177	0.0207121	grb7.S	2.96296	0.00220318
cass4.S	-3.47669	6.22e-13	dhps.L	1.05167	0.0482495	dscaml1.L	1.64822	0.0219246	itpkb	2.21857	2.17e-11	mansc1	2.95964	1.67e-22
Xelaev18042158m	-3.48161	0.00410282	fkbp1a.L	1.05084	0.0469455	mtx3.L	1.64798	0.016927	ppl.S	2.21679	0.00291402	htra1.S	2.95835	8.01e-12
LOC100495222.1.L	-3.50046	4.56e-06	gtf3c4.L	1.05046	0.00914924	ag1.L	1.64707	0.000230312	gpatch4.S	2.21597	2.76e-07	LOC108707795	2.95567	0.0060553
mix1.L	-3.5011	6.36e-07	LOC108701134	1.04867	0.00190388	cfp.L	1.64587	0.000134581	ston1.S	2.2146	0.0173994	tmem181.L	2.9546	7.19e-09
Xelaev18042001m	-3.51826	0.031605	mms22l.L	1.04704	0.0243389	gtf3c4.L	1.64575	2.85329e-10	fam3c.S	2.21419	1.61e-09	mylk.L	2.95273	0.000165014
LOC108706202	-3.54153	0.00223552	rpl19.L	1.04681	0.0312917	ckm.L	1.63731	1.41691e-05	LOC108709518	2.21086	0.00412941	lipc.S	2.95271	0.0476557
has2.L	-3.58389	2.29e-09	ptmap12.S	1.04643	0.0058013	hras.L	1.63571	6.08444e-08	smtnl1	2.20693	0.00761724	tram1.L	2.95104	9.43e-13
en1.L	-3.59736	3.34e-05	cnn1.L	1.04053	0.00407654	Xelaev18011395m	1.63432	0.0476973	mob2	2.20691	7.75e-14	plekhg7.S	2.94969	1.14e-19
npy2r-like.1.L	-3.60605	3.8e-09	bop1.S	1.03933	0.00332796	rab11fip4	1.63384	0.00826053	tmem221.L	2.20454	0.00481941	sgms2.S	2.94783	0.00486275
pdp2.L	-3.64028	0.00332401	xrcc1	1.03831	0.00456064	cdkn2c.L	1.6321	0.00197781	LOC108711745	2.20444	0.041699	rcn3.L	2.9477	1.58e-08
ccdc141.L	-3.65301	2.31e-06	znf282	1.0377	0.0385518	aknad1.L	1.62952	0.0438803	nxpe3l.6.L	2.20378	1.8e-12	pdxdc1.S	2.94682	6.54e-19
Xelaev18023727m	-3.66353	1.2e-08	donson.L	1.03495	0.0134558	rrp12	1.62918	0.000165634	rhebl1.L	2.20014	3.31e-15	manf.L	2.94537	1.62e-12
1a11.L	-3.66379	2.52e-13	rpl7a.L	1.032	0.00155077	socs4.S	1.62668	0.00186055	post10.L	2.1992	2.39e-06	spns1	2.94321	5.58e-12
MGC79993	-3.69043	3.52e-11	Xelaev18016670m	1.03063	0.00756932	LOC108716735	1.6224	2.09957e-06	cdkn2aip.L	2.19682	1.56e-25	tmem213.L	2.94115	0.000401076
hoxc12.L	-3.69508	9.52e-13	znf653.L	1.02641	0.000767253	setd4.L	1.62078	0.0016083	cdk5r1.L	2.19441	4.01e-07	ifngr2.1.L	2.93915	3.12e-07
htr5a.L	-3.70287	6.76e-05	pgls.S	1.02609	0.0350888	plscr1.L	1.61863	1.74881e-08	phlda2	2.19438	0.022491	ggt6	2.93908	3.35e-05
LOC108719085	-3.71841	1.9e-12	post.L	1.02505	0.0232175	gpr65.S	1.61416	0.0196806	zbtb46.S	2.19184	3.64e-14	MGC53587	2.93422	0.00704553
slc7a4.S	-3.7202	0.0102559	mdh1.S	1.02253	0.0351758	kcnk5.S	1.60991	2.56258e-07	tmem8a.S	2.18562	5.56e-08	stx19.L	2.92922	4.7e-16
bix1.1.S	-3.76514	0.0250095	recql.L	1.02224	0.0150303	Xelaev18019738m	1.60538	0.00500716	phyhd1.S	2.18548	5.05e-08	supt5h	2.92831	0.0157859
Xelaev18021016m	-3.76566	0.000832308	apoo.L	1.02149	0.00567721	prickle2.S	1.60393	0.00809262	lrp2.L	2.18356	6.39e-09	axin2.S	2.92716	3.07e-05
hoxd9.L	-3.76586	0.00106957	riok3.S	1.02042	0.0058835	shroom1	1.60371	0.000472861	fa2h.L	2.1832	0.00125364	rasgrp1.L	2.92498	1.54e-08
LOC108718080	-3.77708	0.00138738	fau.S	1.01797	0.00196349	pank1.L	1.60162	1.20418e-07	tbc1d14	2.17838	4.6e-28	copb2.S	2.91628	1.16e-31
mixer.S	-3.79108	0.0360551	rfx2.S	1.01788	0.00337511	Xelaev18003310m	1.60112	6.20356e-05	ptk2b.L	2.17806	0.0199329	MGC147188.L	2.91506	0.000969324
emx2.L	-3.79537	0.00460756	rplp2.L	1.01603	0.00142983	il17rd.S	1.59827	0.0024022	LOC108717923	2.17675	1.28e-08	sdc1.L	2.91348	7e-18
lhx1.S	-3.81514	9.39e-16	faim.L	1.01554	0.0298768	fam83f.L	1.59272	0.000929916	ppp1r3b.L	2.17577	1.32e-07	msgn1.L	2.91261	0.0108858
nos1.S	-3.83343	0.0326748	mrpl48.S	1.01211	0.000239559	LOC108718445	1.59089	0.0031488	hey1.S	2.1751	0.00697841	stard4.L	2.9121	5.04e-08
prkab2.S	-3.83962	4.46e-06	rtp3	1.0116	0.0447437	pias2.L	1.5896	0.00729254	slc45a3.L	2.17308	1.23e-20	ttc12.L	2.90255	0.00215205
LOC108719512	-3.83983	0.0203694	tmem258.L	1.01128	0.00778896	znf148.S	1.58775	0.00181325	ccser2.L	2.16971	6.74e-13	b4galt5.S	2.90239	3.27e-28
Xelaev18024628m	-3.84032	0.000223832	rps3.L	1.00951	0.000903502	LOC108702168	1.5844	0.0370751	LOC108709417	2.16792	0.0279219	mfsd2a.L	2.90217	0.00416558
foxj2-b	-3.84163	0.000768795	casp3.S	1.00442	0.0257032	atp8b3.L	1.58356	0.0120385	tead4.S	2.16248	4.37e-16	hprt1.L	2.90183	6.51e-09
fam167a.S	-3.86121	0.00300794	rps3.S	1.00298	6.61e-05	kcnj15.L	1.58336	0.00456426	hes6.1.S	2.16177	1.3e-07	ccl28	2.89579	0.00418493
Xelaev18039988m	-3.86288	0.0386464	hnrnpr.L	1.00243	1.15e-05	arl4c.S	1.58286	7.57877e-06	slc44a4.L	2.16122	2.82e-07	ston1.S	2.89506	9.78e-07
chrd	-3.86991	1.17e-20	upk1b.S	1.00192	6.07e-05	rgcc.S	1.58093	0.0151517	vgll1.L	2.16089	0.000424734	chsy1.L	2.88761	1.18e-09
edn2.S	-3.93234	0.000182244	rps3a.S	1.00166	0.00078662	MGC145518.S	1.57853	4.70517e-06	c1galt1.L	2.16046	8.63e-11	b4galt1	2.88637	8.71e-30
mespa.S	-3.94307	2.06e-08	pde12.S	1.00001	0.000438692	sesn1.S	1.57728	0.00746225	cnksr1.L	2.15948	8.38e-16	dip2a	2.88116	1.63e-29
clcf1.L	-3.9433	1.6e-18	slc35a2.S	0.999555	0.00182813	ckap4.S	1.57313	7.82866e-09	LOC108698113	2.1527	4.74e-15	dnajb9.S	2.87778	1.06e-09
gucy1b2	-3.97751	0.00543087	dtx3l-like.L	0.998816	0.00326537	cnn1.S	1.57205	3.36171e-09	camkv	2.15063	0.00347069	ago1.S	2.8675	2.74e-08
Xelaev18003951m	-3.98355	1.7e-05	pam16.L	0.998643	0.029833	tmem79.L	1.57107	4.24708e-07	nr1d2.L	2.14941	0.000688424	slc9a3r2.S	2.86707	2e-08
moap1.S	-4.00083	0.00142797	grhl1.S	0.996741	0.0185773	foxn4.L	1.56731	0.00352842	acpp	2.14874	2.47e-07	tcte1.L	2.86651	0.00928653
LOC446292	-4.04576	0.00460756	rhoa.2.S	0.99584	0.00586076	MGC130877	1.56368	1.67624e-09	rgcc.L	2.14555	7.34e-05	atad3a.S	2.86474	4.75e-16
star.L	-4.06099	0.000165189	ccnb3.S	0.994028	0.013323	sox2.L	1.56267	0.00023917	LOC108715654	2.14488	4.8e-06	amotl1.S	2.86441	2.24e-19
il12rb2	-4.06573	0.00140766	tpd52l2.S	0.993089	1.1e-05	kpna2.S	1.55876	1.90819e-05	slc2a2.L	2.14407	2.62e-08	MGC52899	2.86346	0.000212525
slc9a4.L	-4.07753	0.0447805	LOC108705295	0.991511	0.00479469	myb.S	1.55837	0.0123884	map2k6.L	2.14343	3.03e-24	tmem8a.S	2.85898	9.48e-09
LOC108717617	-4.1144	0.0132709	pank1.L	0.991448	0.041027	atp6a1	1.55618	0.000141779	inpp1.L	2.14202	0.0409025	sertad2.L	2.85638	0.000142855
frmpd4.L	-4.15905	0.0361856	cd3eap	0.990163	0.00168892	rybp.L	1.55111	3.79908e-06	fsbp	2.13929	3.23e-05	wdr86.L	2.84826	0.00985534
LOC108698413	-4.16562	0.0281183	pick1.S	0.989857	0.0446634	mad2l1bp-like.L	1.55006	2.49121e-09	sytl5.L	2.13904	0.0232571	trpm7	2.84582	4.52e-05
cass4.L	-4.22781	0.000659258	dnajc19.L	0.988026	5.03e-06	tmem171.L	1.54513	4.77319e-06	trpm4	2.13779	1.04e-14	nipal4.S	2.84438	5.51e-20
fgf20.L	-4.23289	1.1e-09	zmiz2.S	0.987947	0.00947989	pim1.L	1.54455	1.9055e-11	wdr77.S	2.13762	1.79e-14	krt5.7.L	2.83589	3.66e-17
pax3.L	-4.24636	2.84e-10	MGC131302	0.987842	2.94e-05	arhgef19.L	1.53933	8.65444e-05	slc25a25.L	2.13499	6.17e-12	gdpgp1.S	2.82864	3.86e-12
onecut2.S	-4.26949	5.77e-09	lsm3.S	0.984028	0.0498601	slc35a2.S	1.53926	1.98577e-05	dlx2.L	2.13451	0.00106519	timp3.S	2.82854	0.000889214
gpr45.S	-4.27455	1.69e-06	ccdc71l.S	0.983584	0.0101589	tuba3c.S	1.53358	1.35941e-07	cdkn2aip.S	2.13052	1.45e-13	st3gal2.2.S	2.8281	0.000143443
twist1.L	-4.2921	0.000774568	cbx1.S	0.982934	0.0155284	upk2.L	1.53215	4.491e-07	umod.2.L	2.12986	0.0120938	Xelaev18023107m	2.82628	0.027078
fzd8.L	-4.29593	1.09e-16	svbp.S	0.982714	0.00371233	LOC108698165	1.52987	0.0261604	srprb.S	2.12882	2.3e-07	pcp4.S	2.81961	0.0212125
LOC108705022	-4.31926	1.25e-15	trmt6.S	0.981545	5.86e-06	lrrk1.L	1.52807	0.000211859	spdef.S	2.12437	2.8e-07	aacs.S	2.81459	5.11e-06
pitx2.S	-4.34774	3.57e-08	bcorl1.S	0.981082	0.00200755	capn2.2.S	1.52757	0.0441639	tmem203.S	2.12366	8.31e-12	Xelaev18045499m	2.81072	2.13e-06
vps37d.S	-4.35307	0.00167926	chchd4.S	0.98102	0.00332157	zfyve28.L	1.5271	0.000537512	nrarp.S	2.12262	6.66e-14	rassf6.S	2.80741	2.84e-07
adm.L	-4.35505	0.0040263	tcf7l1.L	0.980756	0.00117212	flvcr2.L	1.52611	0.00020898	tsr2.L	2.12251	1.66e-10	atp13a4.L	2.80208	0.000112553
fli1b.L	-4.36001	0.0035941	upk3a.L	0.978085	0.0003419	tbcd	1.52325	4.50426e-07	dnajb5.L	2.1212	0.000101934	prr5.L	2.79941	1.47e-05
prdm12.L	-4.38087	0.00111377	fau.L	0.976366	0.0254022	trim67.S	1.52272	0.0129101	prelid3b.S	2.12024	1.02e-06	c1galt1c1.S	2.79665	2.57e-05
cdkl5.S	-4.3842	0.000111864	rrp1b.S	0.975991	0.000911959	sp6.L	1.52267	0.0365465	cmpk2.L	2.1192	0.0348106	pde9a.L	2.79512	0.000348387
trpm8b.L	-4.39574	0.00127031	prss8.S	0.975155	0.0399161	rnf24.L	1.52151	0.0207981	Xelaev18029977m	2.11656	0.000939321	ap4e1.S	2.79205	0.0323145
lrit2.S	-4.39829	2.35e-07	plscr1.L	0.974968	0.00504662	Xelaev18016670m	1.52061	0.0212625	zbtb46.L	2.11592	1.88e-08	robo3.S	2.79155	5.69e-06
Xelaev18026287m	-4.41122	0.0257543	rpl19	0.974521	0.022248	dusp1.L	1.51808	1.48622e-07	LOC108713255	2.11419	5.22e-07	sytl2.L	2.79035	1.67e-20
LOC108705679	-4.4663	0.0187962	spcs1	0.974451	0.0371789	irf6.S	1.51355	1.85064e-09	LOC108709519	2.11134	9.26e-07	ap1m2.L	2.78047	3.58e-17
fgf3.S	-4.47522	6.23e-06	mospd3.L	0.973738	0.0185354	apela	1.51248	4.32792e-05	Xelaev18001768m	2.1107	0.00889316	chpf.S	2.77595	3.64e-09
spns2.L	-4.50728	0.00748601	rhno1.S	0.9709	0.00874751	Xelaev18014049m	1.51207	8.53955e-06	lpar6.S	2.0963	0.00031227	nrarp.S	2.77525	9.04e-13
fgf20.S	-4.5456	4.71e-09	LOC108717923	0.968974	0.0243656	hsbp1l1.S	1.50833	0.0219625	ap1m2.L	2.09604	5.93e-08	nr1i3.L	2.77329	5.35e-05
LOC108710651	-4.55036	3.22e-05	rhob.S	0.968707	0.0145683	rps24	1.50625	0.00242051	scnn1a.S	2.09552	3.5e-06	bcdin3d.L	2.77325	3.18e-17
cacnb1.S	-4.56504	0.00985194	stard13.L	0.968212	0.0194552	LOC100495010.S	1.50599	4.47629e-05	dvl3.L	2.09246	3.86e-08	aqp4	2.77131	2.37e-11
flrt3.L	-4.60382	2.03e-13	tp53rk.L	0.966149	0.00974208	ulk1.S	1.50281	0.00318392	trpm7	2.09093	0.00854164	ss18l1.L	2.76873	0.0320712
Xelaev18010420m	-4.61036	2.98e-08	LOC108708488	0.962201	0.00110855	rreb1.L	1.50169	4.31354e-09	zbtb11.L	2.0899	4.73e-11	c5orf15.S	2.76851	4.14e-22
xlmo1	-4.64966	0.000576075	c9orf69.S	0.96125	0.028726	rassf3.L	1.50076	4.84543e-08	zfp36.S	2.08981	3.75e-06	LOC108702168	2.76815	0.0099003
hoxd9.S	-4.66819	6.88e-05	ccnb2.L	0.957889	9.43e-07	mab21l3.S	1.49789	0.00499396	slc44a3.L	2.08697	3.16e-14	rab27a.S	2.76738	2.22e-08
rgs1.L	-4.6864	4.94e-08	phf23.L	0.955053	0.000158224	klf13.S	1.49663	0.000228555	grik4.L	2.08522	0.0358701	ptk2b.L	2.76547	1.41e-06
Xelaev18001472m	-4.70202	2.26e-15	pon2	0.951621	0.044152	cdh26.S	1.49322	0.00185298	muc1.L	2.08228	0.00900421	anos1.L	2.76426	0.00215895
cbm101731809provisional	-4.70518	0.00147628	cdk2.S	0.950777	0.0127534	rfx2.S	1.48876	0.000114865	add2.L	2.08146	0.0451776	plxna2.S	2.75707	1.53e-08
Xetrov90018873m.S	-4.71441	0.0103162	folr1.L	0.949193	0.0142511	zyx.S	1.48744	0.0183078	rnf139.L	2.07979	3.53e-13	LOC100492708	2.75629	0.000253403
flrt3.S	-4.72016	7.88e-13	psmb4.L	0.948712	0.0471322	LOC108715136	1.48649	0.000545304	mief1.L	2.07847	4.38e-12	LOC108707893	2.75572	1.07e-06
trpc6.L	-4.72521	0.00943753	LOC108698137	0.943215	0.0312957	tsc22d1.L	1.48481	1.80347e-15	arhgef3.2.S	2.07748	1.22e-05	LOC108700281	2.74954	5.12e-12
hoxb3.L	-4.74436	9.24e-05	arpc1b.S	0.942775	0.0215046	fam83c.S	1.48422	0.00686641	upk1b	2.06939	2.01e-38	rtbdn.S	2.74773	0.00382884
hao1.L	-4.75223	0.000902785	lipt2.S	0.942482	0.0420871	oat.1.L	1.48269	4.54052e-12	clcnkb.L	2.06841	0.00465675	slc33a1.S	2.74537	3.19e-13
Xelaev18001114m	-4.75631	0.00589811	cwc25.S	0.94131	1.62e-05	fth1.S	1.4808	3.03225e-08	samd15.L	2.06641	2.32e-05	tdgf1.3.L	2.74457	5.24e-06
Xelaev18032521m	-4.75693	0.0202074	snapc5.S	0.940388	0.00110855	pidd1.L	1.47972	0.00400443	LOC108700979	2.0656	0.0165227	slc25a22.L	2.744	8.07e-09
LOC108699675	-4.76041	0.0253537	dctn3.S	0.938329	0.0446072	ptpn14.S	1.47878	0.00164903	LOC100192369	2.06058	0.0128118	dnajb14.S	2.74219	3.9e-07
LOC108709611	-4.77499	6.89e-08	LOC108716071	0.932385	0.0128122	cyfip2	1.47634	0.0366633	gpsm2.L	2.05953	4.14e-05	LOC108709518	2.74218	0.000302746
adgrg2.S	-4.78041	0.000483925	eef1b2	0.932315	0.0463603	znf653.L	1.47562	3.20855e-07	plekhs1	2.0595	0.000542196	znf385a.L	2.74144	0.00460967
LOC108697967	-4.78397	0.0342249	ndufb10	0.931633	0.0446072	c5orf15.S	1.47444	1.41886e-08	LOC108708108	2.0594	0.0125048	thap5.S	2.74108	6.58e-10
lzts1.L	-4.863	2.59e-06	rhov.L	0.931348	9.46e-07	LOC108702918	1.47369	0.0128652	LOC108704302	2.05744	9.48e-06	vamp5.L	2.73652	0.0452166
hsd17b6	-4.86605	0.00830594	hnrnpdl.L	0.924236	6.12e-07	post10.L	1.47334	0.000590791	cfp	2.0574	0.00132214	c6orf132	2.73557	1.23e-08
LOC108699856	-4.90602	8.6e-06	ak2.S	0.919812	0.0438078	LOC108702843	1.47189	1.32658e-07	ttc39a.L	2.05531	2.57e-05	upk1b	2.73433	1.05e-36
des.1.S	-4.93621	6.67e-06	ufc1.S	0.919786	0.00167873	c2orf68.L	1.46917	0.0134802	hid1.S	2.05209	1.84e-10	fndc10	2.73154	0.000208133
fbn2.S	-4.94088	0.0220239	slc25a25.S	0.919665	0.0182973	wdr77.S	1.46913	7.49194e-07	smad1.S	2.05155	2.73e-16	sncg.L	2.73007	0.00077071
fads2.L	-4.94487	1.63e-15	ino80e.S	0.918463	0.0455692	MGC132236	1.46873	1.13994e-06	Xelaev18047817m	2.04888	0.0130573	ppargc1b.L	2.73	0.0156735
LOC108699131	-4.95858	2.06e-46	ints9.S	0.917339	0.0258157	plk1.L	1.46537	8.47727e-05	egr1.L	2.04569	0.0284568	rab11fip2.S	2.7286	8.53e-13
hhex.S	-4.96278	2.18e-32	LOC108708564	0.917139	0.00514896	fam212a.S	1.46188	0.00380821	MGC76328.L	2.04246	2.34e-20	tnfaip8l2.S	2.72856	0.0207345
slitrk1.S	-4.96527	0.00119545	emg1.L	0.914833	0.0166875	tsr2.L	1.4567	5.60407e-05	arhgap33.L	2.04106	6.76e-14	adamts10.L	2.72514	0.00312364
lhx1.L	-5.00097	6.37e-30	cmtr2.L	0.913833	0.0241448	cbr1.1.L	1.45038	0.0327588	LOC108706234	2.04049	3.72e-08	ttc39a	2.71816	1.34e-06
Xelaev18003995m	-5.03638	0.000173526	arrdc3.L	0.911026	0.0462109	hspa13.L	1.44677	0.00449878	slc25a22.L	2.0384	0.00450565	endod1.S	2.71721	1.84e-20
fxyd6.L	-5.03797	0.0253537	sapcd2	0.90932	0.00108884	poli.S	1.44642	0.00981592	scn1b.S	2.03836	0.000992971	Xelaev18029977m	2.71708	4.11e-05
slitrk5.S	-5.08112	1.08e-36	nasp.L	0.908953	0.00316591	LOC108714379	1.44353	0.00459957	slc17a9.S	2.03831	6.84e-05	vegt.S	2.70993	1e-09
menf.1.L	-5.1266	8.67e-35	ldhb.S	0.905164	0.0330492	tnfrsf10b.S	1.43885	0.00127138	irf6.S	2.03642	2.05e-13	lypd6b.L	2.7087	5.76e-05
flt1.S	-5.13527	0.0204136	stk25.S	0.904845	0.00389681	rassf10.L	1.43678	0.00384346	uspl1-like.L	2.03443	2.06e-11	limch1.S	2.70362	0.00479727
barhl1.L	-5.17011	0.00566949	dgat1.L	0.90364	0.016564	ier5l.S	1.43586	1.23919e-06	mrpl3.L	2.03244	0.0030592	naa15.S	2.70324	6.69e-12
osr1.L	-5.1721	6.42e-13	tpi1.L	0.902703	0.034478	LOC108716586	1.43392	0.0401297	Xetrov90002352m.L	2.02914	0.00868577	clcnkb.L	2.69507	4.95e-05
nodal3.1.L	-5.19003	0.000719179	gadd45gip1.S	0.899062	0.00656937	hpgd.L	1.43383	3.06967e-11	cep170b.L	2.02867	2.6e-10	gpatch4.S	2.69485	1.12e-10
LOC108697063	-5.19757	0.044536	rpl37.S	0.898402	0.0160024	pdxdc1.L	1.43034	2.082e-06	ifngr2.1.L	2.0263	2.38e-06	tspan13.L	2.69471	1.4e-16
gja4.L	-5.24723	0.000176896	hyal2.S	0.897745	0.00844053	jag1.L	1.42611	0.0172827	not.L	2.02619	4e-07	mid1l2.L	2.68644	2.72e-05
tnip3.L	-5.2512	0.00326348	f2rl1.S	0.896815	0.000718113	trpm4	1.42595	4.12116e-05	fsbp-like.L	2.02422	1.07e-18	psme3.S	2.68639	1.48e-08
sult1c4	-5.25554	0.00791735	rpl17.L	0.89662	0.0116829	tob1.S	1.42522	0.00274354	LOC108718667	2.02265	4.55e-08	LOC108716728	2.68386	0.0157062
chrd.2.L	-5.27002	2.51e-10	mknk2.L	0.895128	0.000353482	itga3.L	1.42479	0.0287348	LOC108703769	2.02241	0.000105618	slc45a3.L	2.68073	6.55e-33
shh.S	-5.33463	0.0429292	ier5l.S	0.892616	0.0246499	cdca3.L	1.41613	8.39671e-06	nop56	2.02128	0.00137173	itpkb	2.6776	8.84e-12
igfbp4.L	-5.3825	0.0321072	pqbp1.L	0.890281	0.00222694	rab11fip3.L	1.41478	0.00205036	LOC495046	2.01138	1.22e-10	post5.S	2.67704	5.32e-13
plekhg5.L	-5.38401	6.57e-43	p2ry2.L	0.887453	0.0142699	p2ry2.L	1.4125	4.71811e-07	rnmtl1.L	2.01111	5.08e-09	rbm38.S	2.67134	1.08e-12
scn2b.L	-5.38584	0.00506277	slc35b1.S	0.886674	0.0279757	azin2.S	1.4124	0.0402621	slc35a3.2.S	2.01109	3.22e-15	Xelaev18047413m	2.67132	0.0468544
sebox.L	-5.39739	1.39e-06	rps27.L	0.885905	0.00433253	loc108718659.S	1.41239	0.000406697	ag1.L	2.00952	1.07e-08	hoxc9.L	2.66677	0.0163038
glis3.S	-5.39904	0.00999774	rpl30.L	0.884929	0.00393319	s100g	1.41217	0.0306936	bcdin3d.L	2.00907	8.41e-12	fzd10.L	2.66628	7.18e-13
kcnab3.S	-5.41539	5.24e-07	tmem164.L	0.884218	0.0182225	trmt6.S	1.41152	3.07574e-12	tmem101.S	2.00561	2.48e-05	mfsd6.S	2.66609	1.71e-11
rom1.S	-5.43344	0.000194299	rps9	0.881925	0.0170969	ptma.L	1.40197	1.06593e-09	dolpp1.L	2.00459	6.13e-12	Xelaev18017809m	2.66104	1.07e-09
mfsd2a.L	-5.43717	7.26e-18	malsu1.L	0.881903	0.017077	phyhd1.S	1.39976	0.00479298	LOC108719789	2.00407	7.19e-07	calb2.L	2.66087	0.00313627
slc2a6.L	-5.46962	0.00300794	ubc.L	0.881239	4.1e-06	LOC100497556.L	1.39914	0.000464705	chchd4.S	2.00309	7.71e-10	tprn.L	2.66085	0.00049648
xhoxc8	-5.5021	0.0164159	LOC108710532	0.880322	0.0171864	pcdha13.L	1.39821	0.0259601	tmem163.S	2.00189	2.92e-06	serp1.S	2.65798	2.45e-14
adcyap1.S	-5.52479	1.32e-36	rpl15.S	0.879731	0.00387965	smad7.S	1.39723	0.000125273	LOC108701363	2.00093	0.0495638	myo5c.L	2.65265	3.05e-07
hhex.L	-5.53242	4.43e-22	rpl34.L	0.879396	0.0230406	mex3b.L	1.39626	1.31582e-07	c12orf45.L	1.99807	3.25e-08	arhgef16.L	2.65258	1.29e-19
nr2f1.L	-5.55893	3.11e-21	supt7l.L	0.878441	0.00449756	xylt2.S	1.38218	0.0153342	hapln3.L	1.99346	0.000286018	Xelaev18036472m	2.65233	0.00164141
Xelaev18016829m	-5.57022	0.00143919	hspa8.L	0.87842	7.8e-05	rgs3.L	1.38188	0.0023169	c5orf15.S	1.9927	1.52e-12	xarp.L	2.65079	3.34e-13
glipr2.S	-5.57541	1.93e-22	cnbp.L	0.878074	0.000358101	LOC108719026	1.38155	0.0258969	post7p.L	1.98876	1.72e-05	loc100216141.L	2.64852	0.000134452
LOC108710750	-5.57946	2.03e-10	cbr3.S	0.877158	0.0140998	snta1.S	1.38116	0.000308784	zfp91.L	1.98542	1.33e-09	vsig10.L	2.64415	2.01e-08
nodal1.L	-5.58843	0.0444043	nudt9.L	0.876662	0.0457303	zhx2	1.37849	0.000411228	Xelaev18014171m	1.98476	0.00109333	ccdc125.S	2.64247	2.35e-08
pkdcc.2.L	-5.61543	1.2e-16	myd88.S	0.876557	0.0155125	ankrd35.L	1.37723	0.000179881	Xelaev18014049m	1.98273	2.33e-07	lpcat4.S	2.64227	3.7e-16
Xelaev18024303m	-5.63514	0.00157604	mrps30.L	0.872843	0.0428477	dgkd-like.L	1.37572	0.00120819	sirt6.S	1.97966	3.57e-11	larp4.L	2.6365	7.66e-19
LOC108710749	-5.65346	0.0439189	gramd3.L	0.872825	0.00941482	sphk2.S	1.37412	0.00443293	upk1b.S	1.97803	9.91e-32	susd1.S	2.63437	0.00254999
LOC108717435	-5.66528	1.55e-15	1700037h04rik	0.870937	0.00917096	MGC83169	1.37079	0.0284326	lrrn1.S	1.97637	1.29e-05	smad9.S	2.63266	9.85e-06
stx1b.L	-5.6673	0.00285381	timm8a.L	0.870661	0.00082307	cdkn2aip.L	1.36917	1.45895e-12	lgalsl.S	1.97337	0.000291735	LOC108708108	2.63079	0.00793626
hoxc8.S	-5.67912	5.95e-09	acsl3.L	0.870576	0.0144052	epn3.L	1.36751	0.00530038	acmsd.S	1.97322	0.0211916	arhgap27.L	2.62973	1.76e-09
cerkl.L	-5.68293	0.00132975	rpl17.S	0.869426	0.00180613	rarg.S	1.36747	2.28799e-11	cul5.S	1.97195	0.0301924	pip4k2b.L	2.62819	0.000772711
bix2.L	-5.76377	5.47e-06	rps13.L	0.869123	0.0194124	znf710.L	1.3669	3.09477e-05	1700007k13rik	1.96977	2.82e-05	cyp26a1.L	2.62672	0.000445856
Xelaev18042237m	-5.80217	0.0438512	golga7.S	0.867698	0.00902682	mansc1	1.36617	5.73152e-10	fzd3.S	1.96743	2.53e-09	krt18	2.62444	5.95e-05
LOC108714665	-5.81261	0.0102379	LOC108701852	0.866929	0.00379018	shroom4.L	1.36583	0.000152942	ckm.L	1.96697	1.45e-05	hsph1.S	2.62422	2.27e-12
hes3.3.L	-5.82656	0.0486888	psmg1.L	0.864985	0.00156806	clns1a	1.36499	0.000576303	sh2d3c.S	1.96646	0.00841273	clptm1.L	2.62176	5.32e-20
colca2.L	-5.8503	0.000273615	metrnl.S	0.864734	0.00669887	ptgs2.L	1.36063	0.000344393	lamb1.S	1.96285	0.00229622	prrt3-like.L	2.61716	0.00179666
LOC108710786	-5.86288	8.9e-08	prkd1.L	0.864552	0.00175256	boc.S	1.35788	0.0159726	sertad2.L	1.96193	0.0260284	nr1i3.S	2.615	2.35e-07
val.L	-5.87749	5.13e-07	rpl15.L	0.864191	0.000521924	tmem19.L	1.3568	0.0418837	dsc3.L	1.96145	0.00638427	rhbdl3	2.61489	7.12e-07
ccl20.L	-5.88312	0.0438512	ccdc43.S	0.863814	0.0066568	hao2.L	1.35561	0.0282505	LOC108714502	1.96091	0.00874385	LOC108709519	2.6133	2.56e-11
hoxc9.S	-5.90753	0.00663807	rps13.S	0.86344	0.00326603	spag8	1.35537	0.0155517	bicc1.S	1.96088	4.65e-06	tstd1.S	2.60757	4.01e-06
pdgfra.S	-5.91481	4.33e-19	xrcc1.S	0.863303	0.00735832	slc25a34.L	1.35091	0.000626037	LOC108709387	1.96085	0.0442626	lrit1	2.60719	6.71e-07
cacnb2.L	-5.92674	0.000201144	rps7.S	0.862662	0.00114433	bcl2l12.L	1.35067	5.47615e-06	uck2	1.95964	2.34e-05	crocc2	2.60492	7.01e-06
wnt16.L	-5.92742	0.000230916	rpl32.L	0.862147	0.0266954	Xelaev18014773m	1.34714	0.0210386	msx2.L	1.95872	3.99e-05	ablim1	2.60293	1.57e-15
klb.L	-5.94302	0.0359039	rps21.S	0.859877	0.0173796	gopc.L	1.34632	3.91549e-06	Xelaev18007686m	1.95868	0.00754392	slpi	2.60099	0.000858642
LOC108702674	-5.95962	0.0139206	xkr7.L	0.859554	0.000681804	upk1b.S	1.3457	2.0236e-10	col17a1.L	1.9576	0.0400175	mars2.L	2.59837	0.0010436
ppp1r16b.S	-5.98521	0.00667136	rps15.S	0.857843	0.0155304	Xelaev18021989m	1.34455	0.00269453	slc35a2.S	1.95718	1.56e-13	tusc2.L	2.59488	1.53e-09
pitx3.L	-6.06879	2.76e-13	ndufb7.L	0.857452	0.000804329	ifnar1.S	1.34376	0.012325	trmt6.S	1.95519	3.07e-14	spata18-like.L	2.59339	0.00398382
gata2.L	-6.08905	0.00398993	gadd45a.L	0.854111	0.011861	adap1.L	1.3421	0.0207679	hyal2.S	1.95294	1.27e-11	rasd1.L	2.58982	2.95e-12
Xelaev18031473m	-6.08927	1.12e-06	cysrt1	0.854004	2.96e-05	upk1b	1.34194	6.82027e-19	sft2d3.S	1.95083	3.69e-10	adal.L	2.58723	0.016004
Xelaev18000681m	-6.09625	0.03678	rps16.S	0.853535	0.017749	ccser2.S	1.34046	2.03608e-07	fgd4.L	1.94749	2.82e-15	bhlhe40.S	2.58684	0.0157326
kcna2.S	-6.12537	0.0208129	gm20188	0.850006	0.0330149	pdlim4.L	1.33741	0.00395548	p2ry2.L	1.94177	1.53e-08	olfm4.L	2.58589	9.68e-05
Xelaev18042193m	-6.14096	0.00136887	taf12.S	0.848714	0.00261792	fnip2.L	1.33723	0.00121071	slc29a3.L	1.93716	9.2e-13	arhgap6	2.58289	5.06e-11
LOC100495966	-6.18128	0.00221716	rpl6.L	0.848131	0.0174085	phldb3.S	1.33518	1.93438e-05	copb2.S	1.93136	1.01e-18	LOC108707106	2.58238	0.0316731
spib.S	-6.21042	0.0137095	srsf2.L	0.847852	0.00168753	tstd1.S	1.3351	0.0310235	casp9.S	1.93091	2.63e-05	sowaha.S	2.58195	1.74e-16
muc1.S	-6.21457	0.00230354	rps29.S	0.847791	0.00324034	rock1	1.33351	0.00330991	clptm1.L	1.92982	2.28e-22	golph3l.L	2.57621	3.44e-12
mespa.L	-6.24576	2.65e-10	tmem203.L	0.847116	0.0211775	LOC108707041	1.33329	0.00440196	irf9.S	1.92741	1.46e-05	cant1.L	2.57577	3.13e-12
LOC108711352	-6.2557	0.0102379	rpl13.S	0.845143	0.000463064	Xelaev18038969m	1.33151	0.0188493	dipk1c.S	1.92666	0.0440249	eps8l1.S	2.5756	0.0144605
pth1r.L	-6.25935	0.00139205	MGC82657	0.844574	0.00414637	irak2.L	1.33084	0.00164903	itpa	1.92541	0.00025879	dipk1c.S	2.57453	3.79e-05
LOC495206	-6.26346	0.0186492	upk1b	0.842439	5.2e-05	atp5a1.S	1.33039	0.000506211	styk1.S	1.92535	0.00573292	cbr1.1.L	2.57276	2.01e-05
gsc.L	-6.26735	5.09e-71	rabac1.L	0.841923	9.51e-05	poc1a.L	1.32957	7.81484e-06	sphk2.L	1.92366	0.000558911	prkcd.L	2.57239	0.000357243
nrip2	-6.28793	0.0059116	gnb2l1	0.8406	0.000183958	LOC108712891	1.32873	5.21997e-06	fam3d.S	1.92302	2.58e-05	dvl3.L	2.56791	7.2e-05
c1ql1	-6.33396	1.94e-10	rasef	0.839862	0.0164057	cep170b.L	1.32863	4.48738e-05	tbcd	1.92235	1.41e-05	depdc1b.S	2.56618	5.63e-08
nodal2.L	-6.34747	0.00158137	ildr1.S	0.838522	0.00260528	bmp3.S	1.32613	0.0272226	plekhg3	1.92205	0.00115908	LOC108718648	2.56507	3.97e-20
antxr2.S	-6.38218	0.00632493	psmg2.L	0.83768	0.0199662	pprc1	1.32501	0.0251772	tfap2a.L	1.92186	1.9e-06	trmt6.S	2.56477	1.41e-24
LOC108705994	-6.38369	1.97e-57	kat7.S	0.837536	0.0389037	acy3.L	1.32484	0.00145788	adck1.L	1.91964	0.00638928	Xelaev18003251m	2.56449	0.0460987
mixer.L	-6.38496	2.06e-08	abt1.L	0.835769	0.00348407	uspl1.S	1.3216	0.00252247	MGC114904	1.91762	0.0120409	mapt.S	2.56365	0.0031427
Xetrov90024317m.L	-6.47727	0.029893	grx5	0.835578	0.0241448	figf.L	1.32112	0.0188966	upk2.L	1.91728	1.13e-23	lrmp.L	2.56046	8.3e-07
LOC108705749	-6.48715	1.49e-21	ap1m2.S	0.835332	0.00453357	plk1.S	1.32092	0.000552043	hsp70.L	1.90976	0.000689974	LOC108718087	2.55669	0.0001967
spns2.S	-6.50402	0.00378687	trappc2.L	0.834803	0.021862	mycl.S	1.31618	1.23276e-05	adgrf5	1.90975	0.029473	slco4c1.L	2.55632	4.94e-05
cml	-6.53422	0.0123833	mrpl41.L	0.831863	0.0101444	sytl4.S	1.31327	0.000989619	kcnk17.L	1.90959	0.0369425	lhx5.L	2.55355	0.000200097
foxa4.L	-6.54833	3.11e-09	phf23.S	0.829939	0.0190352	hkdc1.L	1.31228	0.000263521	bax.L	1.90763	1.21e-05	plekhm1.L	2.54514	1.38e-10
camta1.L	-6.57334	3.85e-06	nup50.L	0.829514	0.000130835	cdkn2aip.S	1.31036	7.97047e-10	dusp1.L	1.90739	7.95e-08	srgap3	2.54488	0.0192857
Xelaev18002252m	-6.62657	0.00194652	dyrk3.L	0.829167	0.0193822	cnn1.L	1.31025	0.000113543	klf13.S	1.90648	1.22e-08	gmppb.S	2.54473	3.97e-06
LOC108704130	-6.63809	0.000223832	tspo.L	0.828842	0.00461205	itpa	1.30598	0.0350624	mycl.L	1.90605	2.66e-26	selenow2.L	2.5431	1.08e-08
LOC108703460	-6.65673	1.27e-05	LOC108709832	0.827701	0.00831229	gk.L	1.30393	0.000808019	hey1.L	1.90593	2.35e-06	gstt1.L	2.54235	0.000174796
krt16.S	-6.70731	1.78e-07	rps15.L	0.825864	0.032098	tmem138.L	1.30368	0.0148927	efnb3.L	1.90522	3.56e-06	paqr5.S	2.53945	0.0090613
LOC108706704	-6.70985	0.000128635	dgkd-like.L	0.823047	0.0379087	uspl1-like.L	1.30199	0.0016226	gpr161.S	1.90383	0.00196502	LOC108699767	2.53248	0.00338325
Xelaev18019163m	-6.71217	4.03e-13	xpnpep1.L	0.822913	0.00341289	LOC108714877	1.30109	0.0159436	traf4.L	1.89841	3.04e-06	LOC108715654	2.53205	3.59e-05
LOC108697572	-6.76827	0.0473175	gmppb.L	0.822405	0.0115121	post7p.L	1.29745	0.00777411	ccnl2.L	1.89756	3.03e-10	greb1.L	2.53101	0.000261148
mespb.S	-6.78714	2.4e-17	fkbp1a.S	0.821122	0.000357517	LOC108717923	1.29731	0.000168892	naa15.S	1.89711	2.31e-09	ttc24.L	2.5306	0.0428729
Xelaev18002860m	-6.82464	0.00163137	hnrnpa0.S	0.819592	0.00127411	c12orf45.L	1.29686	0.000476256	nuak2.S	1.89305	2.17e-07	epha8	2.52814	0.0304985
Xelaev18022351m	-6.85379	0.0423135	dnaja4.2.S	0.818961	0.0380766	ccnb2.L	1.29546	2.15825e-05	nt5c3a.L	1.89272	0.0131714	tmem63a.L	2.52706	1.11e-14
LOC108718887	-6.85492	0.00159539	slc4a1ap.S	0.818231	0.0291604	gmppb.L	1.29416	1.23341e-06	atp6a1	1.89265	2.47e-07	cdkl2.L	2.52526	0.00970624
chrd.L	-6.88685	4.31e-92	gtf3c6.L	0.817094	0.00106948	dhps.L	1.29405	0.000215449	derl1	1.89201	7.12e-11	akr1c2.L	2.52509	0.00376301
otp.S	-6.90651	4.49e-05	hnrnpa2b1.S	0.816496	0.00101769	mfsd2a.S	1.29376	0.0131142	lox.L	1.89063	0.0143172	cnksr1.L	2.52437	3.3e-13
htra3.S	-6.93372	4.71e-05	rps29	0.815107	0.00821359	rbm38.L	1.29367	1.25748e-05	ccl28	1.88634	0.0284062	aatk	2.52393	0.0124274
osr2.S	-7.02887	1.25e-50	plin2.L	0.813794	0.00596767	Xelaev18043700m	1.29345	0.0211759	nbeal2.L	1.88509	0.000150396	larp4.S	2.52287	5.03e-20
asgr1	-7.1044	0.0317176	isg20l2.L	0.81373	0.0058636	slc9a7	1.2911	0.000223087	mfsd6l.S	1.88498	0.000680618	hic2.L	2.52279	1.26e-12
sia1.L	-7.11491	3.35e-05	MGC68458	0.813038	0.0203116	cfap77	1.28776	2.44538e-05	rgs4.S	1.88373	0.0139933	gan.S	2.52156	1.02e-09
Xelaev18000337m	-7.14975	1.54e-49	cldn23	0.812912	0.0129938	trpv6	1.28431	2.04898e-05	ccdc117	1.87902	1.56e-16	LOC398451	2.52143	0.00173867
LOC108719251	-7.19126	0.000201144	gfpt1.S	0.808879	0.00425974	cecr2.L	1.28137	0.000879861	erbb3.S	1.87878	7.43e-06	fzd6.L	2.52131	9.75e-05
cntn1.L	-7.25975	0.000540898	harbi1.L	0.808571	0.0118185	gapdh.L	1.27747	0.00168665	cks2.L	1.87533	1.08e-09	tm9sf2.L	2.52016	1.16e-20
kissr1b.L	-7.27306	0.00473305	xbp1.L	0.808453	0.0449651	Xelaev18016684m	1.27725	0.0305818	cnn1.S	1.87396	4.27e-13	zhx2	2.51892	8.11e-07
chrna4.S	-7.36723	6.33e-08	MGC81970	0.807785	6.35e-05	igsf3.S	1.27709	0.00998564	rfx2.S	1.87349	8.7e-14	atp6v0d2.L	2.51529	0.0202983
dusp10.2.S	-7.3812	1.03e-05	mrpl9.S	0.807623	0.00545879	Xelaev18012386m	1.27516	0.0261692	insm1.L	1.87306	0.0219321	cdx1.L	2.51485	1.99e-05
homeobox100496651-provi	-7.39597	5.63e-21	ckap5.L	0.80641	0.0184067	twsg1.L	1.27471	4.07351e-06	LOC108699767	1.86963	0.00832782	clic1.S	2.50509	8.76e-06
LOC108713650	-7.46954	2.94e-05	srrt.S	0.806173	0.0126746	tpgs1.L	1.27429	0.000360205	tmem8a.L	1.86869	9.2e-08	tsr2.L	2.50471	1.13e-11
LOC108703547	-7.56792	0.000150322	ripk1.L	0.806143	0.00839239	prickle2.L	1.27415	0.00412508	ncor2	1.86844	2.41e-07	Xetrov90024133m.S	2.50261	0.00444854
amigo2	-7.68932	7.66e-05	psmb5.L	0.805411	0.0482436	Xelaev18037028m	1.2723	0.0306518	aim1l.L	1.86555	0.000360692	tmem56.2.L	2.50215	0.00148982
LOC108705533	-7.71877	2.15e-11	psmd13.S	0.802123	0.00827312	lifr.L	1.2707	0.00535033	rbm24.L	1.86481	4.78e-05	clptm1.S	2.50062	3.67e-09
alg11.S	-7.7386	0.00469714	psmb6.L	0.79979	0.000108143	LOC108701212	1.26555	8.75587e-05	galnt6	1.86418	3.58e-09	cd99l2.L	2.50042	9.27e-06
foxa4.S	-7.74698	9.17e-09	LOC495950	0.799668	0.018609	pmm2.L	1.26391	0.00199166	cers2.L	1.85832	1.21e-15	pdcd11	2.5003	0.000627304
osr1.S	-7.74713	1.15e-13	brix1.L	0.799206	0.00623239	Xelaev18022166m	1.26065	0.0121113	chmp4b.S	1.85736	1e-15	hoxd3.L	2.49728	0.0490801
otx2.L	-7.82691	1.4e-72	exosc4.S	0.797504	0.0213272	foxh1.L	1.25949	0.0104731	krt18.3.S	1.85715	0.00303021	col16a1	2.49511	0.000316183
dram1	-7.85593	2.29e-06	rps3a.L	0.796855	0.0102177	znf462.S	1.25942	0.00053036	lsp1.L	1.85544	4.29e-06	ventx3.2.S	2.49335	5.64e-06
pdss2	-7.9587	8.68e-07	anp32a.L	0.796518	0.0023989	vwc2l.2.L	1.25934	0.0407333	kcnn2.L	1.85063	0.0104984	akap10.L	2.49044	7.69e-06
LOC108710966	-8.01669	0.000492046	rpl34.S	0.795766	0.0065909	rundc1.S	1.25918	0.000286109	LOC108699241	1.84976	0.000134954	casq1	2.49001	0.000276888
pcdh8.2.L	-8.0232	7.94e-07	rpl7a.S	0.795761	0.00794645	faim.S	1.25601	1.94598e-05	bcl9l.L	1.84805	0.00950868	adamtsl2	2.48948	0.0195475
Xelaev18034023m	-8.10105	8.73e-46	Xelaev18013888m	0.793395	0.024822	cks1b.L	1.25499	5.11807e-06	oxct1.S	1.84701	0.0380067	upk2.L	2.4894	3.99e-18
fhl1.S	-8.1281	7.44e-07	LOC108701166	0.793143	0.0111679	LOC108701666	1.25187	0.00121916	itprip.S	1.8415	4.37e-05	chmp4b.S	2.48897	3.95e-19
LOC108698278	-8.23281	0.0280922	ssbp1.L	0.79254	0.00388066	LOC108709986	1.25101	0.00308029	prkcd.L	1.83919	0.0134714	nxpe3	2.48756	1.3e-08
gata4.S	-8.29519	1.29e-11	sgpp1.L	0.791763	0.0200673	cenpn.S	1.25045	0.000790124	LOC108701166	1.83819	9.61e-11	inpp1.L	2.47623	0.00158533
MGC82209	-8.43715	1e-08	rps20.S	0.789673	0.00674915	tp53inp1.S	1.24954	5.56707e-05	arf6.L	1.83728	1.21e-07	pdxdc1.L	2.47524	1.16e-21
Xetrov90010614m.S	-8.48368	1.59e-07	szrd1.L	0.789477	0.0114784	LOC108713255	1.2486	0.00317938	f2rl1.S	1.83489	7.23e-07	mgat4a.S	2.46831	2.49e-12
pcdh8.2.S	-8.57059	1.25e-50	frmd4a.L	0.789287	0.0229393	fam83d.S	1.24839	0.00015456	eif6.S	1.82844	8.19e-09	manf.S	2.46758	1.59e-12
LOC108712674	-8.62386	8.31e-09	alkbh5.L	0.789267	0.00055965	LOC108698172	1.24831	0.0042222	nufip1.S	1.82729	2.18e-10	LOC108703814	2.46634	0.0115034
xenf	-8.65464	6.67e-13	tjap1.S	0.788386	0.0141128	psg7	1.24817	0.00351282	socs3.L	1.82723	0.0373179	acy3.L	2.46447	1.66e-09
osr2.L	-8.81898	1.83e-39	MGC82632	0.786374	0.0144165	mob2.2.S	1.24803	0.000270478	mapk6.S	1.82674	4.65e-07	LOC108704931	2.45665	0.0354661
hoxc13.S	-8.91833	2.55e-14	znf238.2.L	0.786187	0.0463438	elmsan1.S	1.24747	0.0106747	lrrc47.L	1.82621	2.36e-09	usp43.L	2.45379	0.000291301
Xelaev18010896m	-9.53968	2.36e-12	h3-3b	0.784331	1.88e-05	adra2a.L	1.24742	0.0108547	sirt7.L	1.82594	2.33e-15	inf2	2.45362	0.00434848
nodal1.S	-10.5664	2.95e-15	psma7.L	0.781771	0.00202133	tiam1.S	1.24532	0.000209775	tefm.L	1.824	0.00271653	sphk1.L	2.45134	9.88e-06
0.155578			mycl.L	0.781412	0.00362149	cldn4.L	1.24461	2.53218e-05	rgs3.L	1.8223	5.2e-06	cers2.L	2.45005	1.69e-24
			kdm2b.L	0.781409	0.0161793	upk3a.L	1.2413	7.22826e-08	slc25a25.S	1.81759	1.25e-12	sphk2.L	2.44928	2.43e-05
			ppp1r14b.L	0.780105	0.00914669	chchd4.S	1.24073	0.000113978	stk38l.L	1.81631	0.000189201	zfpl1.S	2.44788	0.00681526
			ndufs7.L	0.77861	0.0250811	rarg.L	1.24013	0.00224111	hist1h4d.L	1.81598	0.00204892	Xelaev18046999m	2.44773	0.0169136
			rassf7.L	0.778339	1.83e-05	1700037h04rik	1.23913	3.54442e-06	mgat5	1.81523	0.0142269	phyhd1.S	2.44583	3.01e-09
			dido1.L	0.77797	0.0155776	fzd3.S	1.23873	0.00651333	atp13a4.L	1.81395	0.0378019	trib1.L	2.44528	0.00256172
			LOC108702825	0.775098	0.0110806	fam110a.S	1.23681	0.0198394	kiaa1324.S	1.81046	1.29e-07	mkl1.L	2.44457	9.05e-08
			loc733352.S	0.77414	0.00222042	loc728026.L	1.23406	1.0066e-06	st3gal5.L	1.80706	0.0350886	fam219b	2.44369	4.95e-13
			ndufb11	0.769452	0.0201287	LOC108714528	1.23378	0.0333063	acy3.L	1.80628	7.03e-06	itpa	2.44204	3.77e-09
			itgb5.S	0.768767	0.0308834	polr3gl.L	1.23269	0.000470692	chrna2.S	1.80196	7.99e-06	nop56	2.43984	3.99e-07
			cwc15.L	0.766879	0.0145683	znf644.L	1.22866	0.0245345	smad1.L	1.79952	2.48e-22	cartpt	2.43926	0.0455122
			igsf3.S	0.766135	0.00735832	LOC108718134	1.2284	0.005658	tpgs1.L	1.7986	0.000141485	apex2.L	2.43818	0.00266837
			tada3.S	0.765932	0.022248	stk38l.L	1.22752	0.0413023	nckap5l.S	1.79845	8.45e-10	fam136a.L	2.43462	2.55e-06
			epcam.L	0.765012	0.0268399	elmo1.L	1.22701	0.00221361	ccno.S	1.79624	0.00390709	dolpp1	2.43442	1.27e-17
			sqrdl.S	0.762601	0.0371478	hnrnpr.L	1.22408	2.24849e-05	gse1.L	1.79603	2.33e-07	entpd4.L	2.43326	3.67e-28
			ddx39	0.761943	6.32e-05	ildr1.S	1.22382	0.000872916	sptlc2.L	1.79582	7.17e-13	plxna2.L	2.43317	2.27e-10
			hal.1.L	0.760088	0.0358231	sema6d.L	1.22334	3.09649e-06	LOC108697646	1.79344	1.1e-07	crybg3.S	2.43276	1.36e-05
			psma1.L	0.759092	0.00176657	casp9.S	1.22324	0.0223423	rassf6.S	1.79179	0.00609891	minpp1.L	2.43271	8.47e-05
			glul.L	0.758925	0.000308478	pde3b	1.22243	4.98673e-07	lhx8.L	1.79122	0.00785267	nfe2l3.S	2.43154	7.11e-07
			tmem97	0.758381	0.034478	Xelaev18013734m	1.22152	0.00400443	gatad2a.L	1.79034	1.05e-08	mgat5	2.43105	6.55e-11
			krtcap3.L	0.75724	0.00961523	cecr1.S	1.21858	0.0397317	kdm7a.S	1.78959	8.77e-06	gas6.L	2.43102	1.35e-14
			rps10.L	0.757163	0.0182276	ddx28.L	1.21725	7.38435e-05	prph.S	1.7894	0.00278577	kdm7a.S	2.43099	1.86e-08
			rps27l.L	0.755869	0.0379156	igdcc4.L	1.21613	0.023739	Xelaev18019738m	1.78743	0.00980492	nradd.L	2.43084	7.47e-07
			LOC100036994	0.75546	0.0456552	smad1.S	1.21328	0.000195548	rcor1	1.78712	6.97e-08	grwd1-b	2.4308	9.11e-13
			ccdc167.S	0.754816	0.0122226	nasp.L	1.21324	5.11807e-06	LOC108714528	1.78627	0.00417401	sdf2l1.L	2.4258	1.03e-14
			htra2.S	0.753706	0.0247123	chkb.S	1.21122	0.00112851	bmper.L	1.78426	0.000271013	capn8-like.L.L	2.42216	0.000362199
			irf6.S	0.753506	0.0425086	LOC108697862	1.21055	4.20657e-08	LOC108702448	1.77906	5.67e-06	upk1b.S	2.42086	5.62e-31
			chd2.L	0.751034	0.0290162	tmprss3.L	1.20793	0.0286162	poc1a.L	1.77898	7.78e-06	kiaa1324.S	2.41991	2e-10
			pcna.L	0.750412	0.0412173	arhgap23.L	1.20458	0.0127786	lpcat4.S	1.77897	5.78e-08	derl1	2.41872	1.18e-15
			reep5.L	0.749989	0.0425872	hbegf.L	1.20427	1.90549e-06	relt.L	1.77807	6.3e-08	msx1.S	2.4178	2.23e-08
			tbc1d20.2.L	0.749859	0.0326428	LOC100488689.S	1.20418	0.0102521	oaz2.S	1.77636	2.46e-05	tbp.L	2.41731	1.1e-05
			tsn.L	0.749386	0.0064023	rhog-like.1.L	1.20245	0.000189618	nsg1.L	1.77559	0.0284062	fgd4.L	2.41335	8.12e-19
			LOC108719008	0.74844	0.0182973	tcp1.S	1.20224	5.93114e-05	znf653.L	1.77397	3.09e-13	pus1.S	2.41321	9.65e-20
			rps23.L	0.747347	0.00737042	pygo2.L	1.2011	0.0260021	polr3h.L	1.77251	4.07e-08	capn13.L	2.41083	6.67e-08
			rpl36.S	0.747108	0.0161949	f2rl1.S	1.19557	0.00335963	plscr1.L	1.77225	5.34e-10	tmem131l.L	2.40891	4.67e-05
			rfx5.S	0.74668	0.0316861	ier5.L	1.19533	0.00280386	txnl4b.S	1.77112	0.008484	cenpn.S	2.40873	3.99e-10
			gnl3.L	0.746322	0.00362024	phf23.S	1.19485	0.000278436	lrrk1.L	1.77093	7.8e-07	irgq.L	2.40238	0.00107357
			cxorf40a.S	0.746297	0.00974208	zbtb46.L	1.1946	0.0102429	dolpp1	1.7702	5.71e-07	smad9.L	2.40073	0.00137903
			hras.L	0.744298	0.00166162	mdm2.S	1.19375	0.011395	LOC108695565	1.76848	2.69e-09	loc100492168.L	2.40052	0.000136753
			akap2.L	0.743107	0.0228653	arhgef2.L	1.19199	0.0128225	LOC108714033	1.76819	0.000872873	dlx1	2.39982	0.000466354
			cdca7.L	0.742656	0.00253816	fmc1.L	1.19178	0.0023246	rgcc.S	1.76774	0.00535794	clns1a.L	2.39876	0.000113231
			eny2.L	0.742603	0.00234914	prss8.S	1.18827	0.00179314	c15orf39.L	1.76566	2.36e-14	kxd1.S	2.39698	2.82e-05
			cdkn2aip.L	0.742503	0.000279223	mgc75753.L	1.18517	5.03422e-05	mos.L	1.76286	1.44e-05	plcl2.L	2.39553	1.13e-06
			MGC145518.S	0.74248	0.00531126	LOC108719789	1.18234	0.00151078	ndel1.L	1.76216	0.0260508	capn1.L	2.39203	4.14e-11
			wdr77.S	0.74161	0.0484958	srcap.L	1.18213	0.0101	capn8.1.S	1.7612	3.61e-08	hsp70.L	2.38974	0.0002356
			dnajc3.L	0.740599	0.012138	ccdc84.S	1.18049	0.00195772	c2orf68.L	1.76068	3.14e-05	kcnn2.L	2.38832	0.00282071
			rbm12b.1.L	0.739269	0.0240659	has1.S	1.18048	3.5426e-06	clcc1	1.75977	0.0318316	polr3h.L	2.38817	1.64e-14
			lin37	0.738861	0.00648554	Xelaev18002911m	1.17974	0.0245455	LOC108714379	1.7566	0.000146924	Xelaev18001768m	2.38761	0.000341153
			ptrhd1.L	0.738832	0.0460138	ddi2.L	1.1787	0.0228249	pgr.L	1.75474	0.0178562	muc3a	2.38597	2.05e-15
			atg16l1.S	0.737603	0.00303363	nova2.L	1.17801	0.0463924	ntmt1.S	1.75411	0.0190612	hook1.L	2.38523	0.00373169
			mrgbp.L	0.734636	0.0482642	ndst1.L	1.17769	1.38004e-05	tsc22d1.L	1.75403	2.76e-18	mtus1.L	2.38442	1.72e-05
			map3k1.L	0.734168	0.0376635	stk38l.S	1.17491	0.0158332	crocc2	1.75281	0.000294588	hist1h4d.L	2.38439	0.00010056
			kansl1	0.733883	0.0444274	grx5	1.17412	7.36421e-05	LOC108714950	1.75003	0.015532	ehbp1l1.S	2.38367	0.000941819
			gtf2f1.L	0.733293	0.000322373	gprc5cl1.L	1.17319	3.47608e-05	slc33a1.L	1.74785	1.62e-09	ndc1.L	2.37985	2.94e-11
			srsf10.L	0.732298	0.0302765	hspa8.L	1.17122	0.000119146	LOC108719412	1.74531	0.0451249	gpsm2.S	2.37923	8.22e-07
			MGC114789	0.73012	0.0136487	slc19a2.L	1.17079	0.0168972	gdi1.S	1.74514	0.00537582	mboat1.S	2.37748	3.27e-06
			msl1.L	0.728542	0.00473806	mgc75753.S	1.16999	2.24393e-07	xkr8.S	1.74357	0.000884909	vgll4l.S	2.37591	2.24e-11
			rbmx.L	0.72658	0.00708215	pou5f3.2.L	1.16784	0.0459508	fbxo30.S	1.74214	0.000149901	vwa5a	2.37543	0.0303199
			rtca.L	0.726078	0.00780551	acvr1b.L	1.16575	0.00378304	smg9.L	1.73938	0.00534405	rnmtl1.L	2.37295	3.92e-08
			rps2.L	0.725506	0.0326948	LOC108705992	1.16392	0.0241843	slc26a4l.L	1.73915	0.0190921	aim1l.L	2.37152	8.83e-06
			brix1.S	0.722235	0.000164597	LOC108716071	1.16364	0.000330614	timm17a.S	1.7386	4.69e-09	ccdc103	2.37084	1.36e-05
			srsf6.L	0.71927	0.0207397	mst1r.L	1.16251	0.00962424	tmem131l.L	1.73612	2.16e-06	hid1.S	2.36793	5.73e-15
			scamp3.L	0.719125	0.0254022	gli3.L	1.1612	0.00197927	atp5a1.S	1.73562	1.58e-07	fzd10.S	2.36774	3.92e-09
			parp1.L	0.717835	0.0388808	traf4.S	1.1612	1.36727e-05	tuba3c.S	1.73212	2.48e-20	pdgfa.L	2.36753	3.08e-07
			dbnl.L	0.717212	0.0166372	plekhg3.L	1.15955	0.0031374	rnf44.S	1.72955	1.17e-06	col4a1.L	2.36576	0.00196039
			cgn.L	0.715763	0.0138766	loc733539.L	1.15901	0.00384136	mfsd2a.S	1.72786	1.56e-05	tcaf1.L	2.36563	0.00510178
			rps6.S	0.715418	0.0485806	midn.S	1.15791	6.99755e-05	klf11.L	1.72739	1.68e-06	s100g	2.3635	1.37e-05
			actr3.S	0.714744	0.0247907	wdr4.S	1.1568	0.0110358	mex3b.S	1.7266	2.98e-16	chkb.S	2.35904	7.58e-05
			smyd2.S	0.714374	0.0388978	cfap52.L	1.15667	0.00173672	plk1.L	1.7246	1.31e-12	glrx2.L	2.35793	7.37e-25
			rps6.L	0.714283	0.00492816	myl6.S	1.15376	0.00173356	mrpl48.S	1.72133	3.28e-08	slc12a2.L	2.35547	1.74e-15
			ybx2.S	0.713862	0.0427711	ap1m2.S	1.15305	3.77278e-06	polr2j.L	1.72128	0.000306768	smad6.2.L	2.35202	0.000207444
			cox7c.L	0.713075	0.0040612	ogfod2.L	1.15154	0.0365745	gatad2a.S	1.72121	1.43e-16	itprip.S	2.35199	8.46e-07
			snrnp70.L	0.711415	0.000535494	ston2.L	1.15069	0.034559	apela	1.72113	1.2e-07	dolpp1.L	2.35145	2.84e-18
			tpt1.L	0.711123	0.000425591	b3gnt7.L	1.15044	0.0227647	MGC130877	1.72067	2.04e-10	LOC108698113	2.35043	9.71e-09
			eef1a1o.S	0.710435	0.00827312	LOC108715416	1.14962	0.000274651	Xelaev18025954m	1.7164	0.00108508	nufip1.S	2.34445	1.18e-24
			ccdc25.L	0.710228	0.0475373	hspbp1.L	1.14929	0.0168609	slc30a1.L	1.71359	6.29e-08	xpo4.S	2.34366	1.7e-05
			c11orf58.L	0.709658	0.0257294	gpr160.L	1.1468	0.00225904	rab5c.L	1.71313	3.51e-09	rassf3.L	2.34287	1.88e-09
			rbm15.L	0.709348	0.0171249	MGC82469	1.14615	0.0259503	ubald2.L	1.7126	1.78e-09	btg5.L	2.34282	5.14e-07
			eif3f.S	0.709213	0.0252581	slc30a1.L	1.14564	1.68061e-05	hsph1.S	1.71189	5.29e-07	chchd4.S	2.34263	8.65e-10
			ilf2.L	0.708945	2.15e-05	lrp2.L	1.14516	0.0180661	arl8b.L	1.70624	1.83e-06	evx1.L	2.3419	0.00273379
			fam160b2.L	0.708762	0.037381	Xelaev18014171m	1.14283	0.0459083	depdc1b.S	1.70495	0.00150852	npm3.S	2.33845	9.36e-24
			myef2.L	0.708452	0.00183548	sirt6.S	1.14218	1.1776e-09	LOC108718425	1.70439	0.0263679	slc35a2.L	2.3371	9.75e-19
			kiaa0101.L	0.707097	0.0017042	c9orf69.S	1.14203	0.000894308	psme3.S	1.70367	2.46e-05	Xelaev18016818m	2.33195	0.0370235
			mrto4.S	0.706787	0.007695	znf238.2.S	1.14202	0.0003462	ndrg4.S	1.70324	3.58e-09	Xelaev18015385m	2.33117	0.012439
			sap30bp.S	0.706747	0.00142282	copb2.S	1.14022	0.000136404	tram1.L	1.70284	2.7e-07	tbcd	2.33114	4.99e-09
			zmym6nb.S	0.706741	0.0422282	rai14.L	1.13947	0.00175628	mad2l1bp-like.L	1.70281	5.83e-07	ddx1.L	2.33039	2.24e-18
			ctdnep1.L	0.706689	0.0244099	e2f7.L	1.13888	2.53323e-05	ptprh.L	1.70207	0.0291134	cib1.S	2.33022	8.74e-10
			psmb5.S	0.703971	0.0283735	gfod2.L	1.13887	0.00454431	c9orf69.S	1.70169	1.11e-06	adck1.L	2.32604	3.47e-09
			pgam5.L	0.703727	0.0358006	c1galt1.L	1.13611	0.00441778	pank1.S	1.69763	1.38e-07	sod3.S	2.32491	0.00298695
			eogt.L	0.703689	0.0484461	not.L	1.13596	2.30559e-05	cdh26.S	1.69586	3.8e-09	LOC108698063	2.3244	0.000303063
			man2c1.L	0.703356	0.0358231	psma1.S	1.13471	0.00245745	xepsin.L	1.69559	0.00966747	eif6.S	2.32237	6.12e-14
			ap3m2.S	0.700209	0.00243822	sav1.L	1.13327	0.000216021	LOC100493194.L	1.69542	0.0217636	nxpe3l.2.L	2.32215	0.039964
			srsf5.L	0.700002	0.0262343	pdk4.L	1.13261	0.0132314	trim36.L	1.69242	6.86e-06	timm8b.S	2.3213	4.86e-06
			tomm6.S	0.699676	0.0023989	slc25a29.L	1.13183	3.7746e-06	post.L	1.69189	0.000250353	Xelaev18003947m	2.32097	0.000569914
			upf3b.L	0.699257	0.0102923	LOC108695565	1.13039	0.00063977	dse.S	1.69162	0.0090095	timm8a.L	2.31889	7.17e-11
			cramp1.L	0.697774	0.0104857	atpaf2.L	1.12882	0.0143651	wnt8a.L	1.69157	0.00031886	ganab.L	2.31864	5.82e-06
			c1orf35.L	0.697145	0.00076078	casp3.S	1.12853	0.0195896	psmc2.S	1.69136	1.37e-06	pim1.S	2.31747	3.82e-16
			rbm8a.S	0.697089	0.00202205	smad6.S	1.12433	0.00158345	arhgef40.L	1.69036	0.0309547	dusp6.S	2.31592	1.54e-10
			rpl7l1.L	0.696339	0.0387595	fam193b.L	1.12419	0.00428871	kbtbd4.S	1.68961	0.00402655	aatk.S	2.3148	0.00216083
			cenpo.L	0.696249	0.0170748	slc25a39.L	1.12383	0.0385028	tp53i11.L	1.68941	0.00507571	rnf225	2.31445	1.59e-11
			mtus1.L	0.695719	0.0153559	dennd3.L	1.12362	0.00176406	arhgap36.L	1.68774	0.000293913	Xelaev18041809m	2.31301	0.00231933
			ufd1l.L	0.694097	0.00515331	slc25a25.L	1.12195	8.02642e-05	stard3.S	1.68493	3.72e-10	alg6	2.31223	0.00508813
			mrps18a.L	0.693589	0.00669887	MGC114621	1.11837	0.0280848	tubb	1.68365	4.18e-10	Xelaev18018881m	2.31217	0.000394867
			cwc25.L	0.693311	0.00135164	LOC108710290	1.11765	0.0097613	bcar1.L	1.68271	0.00385754	ssx2ip.S	2.30722	0.0409051
			slc9a3r1.L	0.693029	0.0238274	tmem8a.L	1.11756	0.0405207	c22orf15.L	1.68111	0.000171887	gnpnat1.L	2.30264	9.5e-09
			pdlim1.S	0.692867	0.0319447	cox4i2.S	1.11704	0.00131773	wdr89.L	1.681	6.62e-14	cdk5rap3.L	2.30162	1.67e-07
			prim1.S	0.692858	0.0194582	tpd52l2.S	1.11591	4.60022e-07	sphk1.L	1.68072	0.0147923	pick1.S	2.29995	8.85e-08
			irf2bp2.L	0.692575	0.032108	clptm1.L	1.11545	5.92739e-08	pwwp2b.L	1.67935	1.19e-08	ccdc167.S	2.29773	2.56e-09
			uevld.L	0.691965	0.0142699	myl9.L	1.11358	0.00651477	creb3l2.L	1.67904	1.31e-06	add2.L	2.29613	0.00776997
			coq3.L	0.691582	0.0214579	chsy1.L	1.11339	7.38784e-06	Xetrov90029592m.L	1.67855	2.35e-08	ubp1.L	2.29539	0.00240465
			rps12.S	0.688754	0.00794645	LOC108712538	1.11065	0.00251813	dll1.S	1.67798	2.09e-06	tbx3.L	2.29218	5.95e-05
			hs3st1.L	0.68871	0.0498256	irf9.S	1.10749	0.0242587	atf6b.L	1.67631	9.16e-06	samd12	2.29128	8.58e-05
			msl1.S	0.685983	0.0430354	dip2a	1.1031	0.00446179	eif4e.L	1.67548	4.98e-17	slc27a4.S	2.28671	0.000488176
			cirbp.S	0.684783	0.000890724	LOC108698556	1.10039	0.0343395	LOC108708076	1.67416	0.00737095	nhsl1	2.27996	0.000383268
			hnrnpa1.S	0.684483	0.00299393	cdca2-like.L	1.09594	0.00817685	rasl11b.L	1.67263	0.000645735	styx.L	2.27933	0.000289612
			ndufs7.S	0.684249	0.00444966	ckap2.S	1.0958	0.0199734	sema3f.S	1.6684	5.92e-09	cope.S	2.27903	3.02e-15
			nsfl1c.L	0.68396	0.00351451	hsp70.L	1.09188	0.0369911	ankrd12.L	1.6682	3.91e-07	slc30a10.L	2.27604	2.6e-05
			rnaseh2a.L	0.68305	0.0389028	rps12.L	1.09119	1.23163e-05	ifrd1.L	1.66817	8.83e-09	rnf139.L	2.27444	7.1e-13
			rbmx.S	0.682517	0.0137514	xkr7.L	1.08901	0.00412007	faim.S	1.66506	3.87e-07	reps2.L	2.26939	3.92e-05
			phf5a.S	0.680986	0.0256715	h1fx.S	1.08761	0.0228527	hspa8.L	1.66005	9.98e-10	actr5	2.26753	0.0291098
			rps20.L	0.680425	0.0424492	xbp1.L	1.08742	1.44552e-05	nek5.L	1.6594	0.00109467	vrk1.L	2.26603	3.42e-05
			mlf2.L	0.680393	0.00967837	tbc1d14	1.08449	6.68215e-06	fam84b.S	1.65936	1.11e-06	fbxo15.L	2.2637	0.0478225
			saal1.L	0.679826	0.00705074	strap	1.08405	0.00108984	tob1.S	1.65833	8.09e-09	kbtbd4.S	2.26242	3.81e-05
			rps7	0.678778	0.0197624	cspg4.L	1.08242	0.00988401	btg5.L	1.65723	0.00167673	tcp1.S	2.25967	5.46e-09
			rpl8.S	0.678634	0.0255441	derl1	1.08055	0.00100228	ubald2-b	1.65109	3.62e-12	errfi1.L	2.25964	0.000691158
			capn5.L	0.678188	0.00520319	farp2.L	1.08054	0.00434598	tmed9.L	1.64864	5.1e-13	ag1.L	2.25936	0.000373261
			slc16a3.L	0.677399	0.00159072	tubb	1.07909	0.00400992	blcap.L	1.64791	0.000351932	nr6a1.L	2.25935	5.92e-14
			LOC495376	0.675783	0.0360969	tmem203.S	1.0779	0.000623771	ddx3x.L	1.64768	3.72e-24	MGC81163	2.25903	5.4e-07
			pagr1.L	0.675194	0.0218423	phldb3.L	1.07446	0.000483797	cldn4.L	1.64727	3.24e-08	znf148.S	2.25868	2.2e-05
			commd8.S	0.674799	0.0208626	guk1.S	1.0739	0.0105742	gdf3.S	1.64629	0.000628323	LOC108712724	2.25852	0.0361411
			nifk.L	0.673653	0.00179012	mcat.S	1.07239	0.00146409	fzd10.S	1.64389	0.00305529	sowahb.S	2.25814	8.47e-05
			nsep1	0.672511	0.000521924	fhdc1.L	1.07039	0.000154059	erf.L	1.64318	8.86e-14	LOC108714379	2.25801	0.000295355
			ccnb1.2.L	0.671971	0.000610897	oaz2.S	1.06892	0.0178855	LOC100488689.S	1.64285	1.16e-06	icosl	2.25742	0.0320279
			rpf1.L	0.669898	0.0425911	skil.L	1.06831	0.000174808	bcor.L	1.6414	1e-11	nipa2.S	2.25576	0.00305039
			pde3b	0.669584	0.00950724	amotl1.S	1.06822	0.00118671	LOC108699955	1.64037	0.0109601	esyt3.L	2.25476	1.5e-06
			tmub1.S	0.669314	0.0214427	dnmbp.L	1.06754	0.0018008	LOC108718134	1.64008	2.64e-05	atp6v1c2.L	2.24965	0.0122374
			rpl9.L	0.668888	0.018974	cnksr1.L	1.06687	0.000154704	itga3.L	1.63985	0.00122369	timm17a.L	2.24839	7.99e-10
			fam185a.L	0.668206	0.0424268	sapcd2	1.066	3.57117e-08	tspan13.L	1.63863	1.68e-07	pik3cb.L	2.24838	3.86e-06
			csrp2.L	0.665386	0.0123344	polr2j.L	1.0656	0.0204007	emc8.L	1.63789	1.51e-05	elf1.S	2.24655	1.87e-13
			ppp1r15b-like.S	0.664876	0.0117068	cks2.L	1.06373	7.08446e-05	ncoa1.L	1.63643	0.042255	Xelaev18041807m	2.24627	0.0491733
			pinx1.L	0.664854	0.0370683	mief2.S	1.06357	0.00132275	Xelaev18009254m	1.63638	1.01e-06	LOC108710961	2.24478	0.00782502
			hyls1.L	0.663534	0.00648223	incenp.L	1.06267	0.00136443	ugcg.S	1.63556	2.17e-07	setd4.L	2.24442	1.7e-09
			luc7l3.S	0.660972	0.010067	tjap1.S	1.06112	0.00105668	btg2.S	1.63412	0.000367534	kpna1.S	2.2403	0.00538631
			nop56.L	0.659756	0.0229036	larp1.L	1.06112	0.00513782	anapc10.L	1.63374	0.00920382	Xelaev18047817m	2.23912	0.00416283
			hsp90ab1.S	0.656587	0.00534314	pde12.S	1.06073	0.012551	cpd.L	1.63179	3.45e-14	sox3.S	2.23846	1.58e-09
			vps25.L	0.656375	0.0259268	notum.S	1.05968	0.0490074	ago1.S	1.63139	0.0141475	tbc1d31.L	2.23803	2.91e-10
			gtpbp10.S	0.653937	0.0371237	depdc7.L	1.0577	0.00227296	ankmy1.L	1.63075	2.13e-09	psmc2.S	2.2377	6.18e-06
			golt1b.S	0.65294	0.0164552	tbc1d31.L	1.05756	0.0411649	stard4.L	1.62939	0.000684012	rasl12.S	2.2377	0.043229
			nop10	0.652703	0.0256581	cenpl.S	1.05601	7.43955e-06	LOC108702918	1.6284	0.0131392	gby.L	2.23752	0.000310093
			tbrg4.L	0.650591	0.0357645	chmp4b.S	1.05584	0.000194969	fam219b.L	1.62676	0.000390018	phlda2	2.23713	0.000304114
			sde2.S	0.650279	0.0200159	rab3a.L	1.05326	0.0219625	skida1.S	1.62457	0.0214581	c3orf52	2.23674	0.0181147
			ctdnep1.S	0.649128	0.023772	efnb1.L	1.05277	0.0287831	mfsd2a.L	1.62439	0.00168278	LOC108715890	2.23512	0.00644688
			vps72.L	0.648806	0.0114019	gramd3.L	1.05167	0.00944152	MGC68811	1.62318	7.84e-10	c2orf68.L	2.23338	1.51e-09
			rab43.S	0.64657	0.0276607	ccnb2.S	1.04995	2.07431e-05	gorab.L	1.62176	8.39e-09	rhog-like.1.L	2.23286	1.82e-13
			rpl7.L	0.646536	0.00105519	icmt.L	1.04958	0.0128652	tia1.S	1.62055	5.08e-13	tbrg4.L	2.23117	8.53e-07
			hnrnpa0.L	0.645721	0.0451469	Xetrov90029592m.L	1.0494	0.00099203	slc9a1.S	1.61953	3.26e-07	LOC108708076	2.22992	0.000107529
			sap18.S	0.644687	0.0200717	LOC108706006	1.04521	0.0160223	slc4a1.S	1.61872	0.000799605	tmem263.L	2.22903	1.7e-20
			wdr83os.L	0.641948	0.0167249	med9.L	1.0438	0.00319398	capn13.L	1.61795	2.58e-07	mrto4.L	2.22873	9.5e-20
			txnl1.L	0.640756	0.00825834	pank1.S	1.04083	0.00209229	LOC108706788	1.61536	0.0103743	xk.L	2.22809	2.12e-05
			ier3ip1.L	0.639757	0.0312741	map3k10.L	1.03761	0.00299091	smad7.L	1.61428	5.39e-10	msx1.L	2.22764	1.39e-11
			eif4a1.L	0.639648	0.0169048	nufip2.S	1.03718	0.00140194	myl6.S	1.61384	4.33e-10	arl4c.S	2.2261	1.4e-08
			clta.S	0.639484	0.0151306	LOC108709581	1.03662	0.0142444	slc35a5.S	1.61355	1.94e-08	Xelaev18000386m	2.22571	0.00421879
			hmg-17	0.63908	0.000536959	ndrg4.S	1.03576	0.0070426	grem1.L	1.61331	0.0111621	nasp.S	2.22156	3.28e-07
			cox11.L	0.63871	0.0438686	pias3.L	1.03457	0.0294412	slc33a1.S	1.61299	2.82e-07	rrp12	2.21891	6.55e-09
			ppdpf.S	0.638067	0.0082513	cks1b.S	1.03356	0.0031022	kbtbd2.L	1.61299	6.94e-14	adrb3.L	2.21776	0.0140963
			cox6a1.L	0.638023	0.0235688	ranbp3l.L	1.03326	0.0367737	syngr2	1.61145	1.98e-10	fam20b.S	2.21673	0.00187322
			LOC108701269	0.637295	0.0248828	ube2e2	1.03215	0.00383571	sys1.S	1.6093	9.22e-13	hey1.L	2.21439	4.35e-06
			rpl6.S	0.636736	0.0117793	post5.S	1.02878	0.0121216	braf.S	1.60683	0.000244769	bcar1.L	2.2134	4.53e-08
			glul.S	0.635198	0.0331954	elp6.L	1.02875	0.000109101	prickle2.L	1.60665	0.00102498	fam20b.L	2.21147	1.28e-05
			bola3.S	0.635127	0.0426449	mzt1.L	1.02832	0.0109882	ptma.L	1.60653	3.54e-15	Xelaev18019738m	2.21067	0.000491775
			rrp15.L	0.633826	0.0180037	MGC81882	1.02328	0.00260301	upk3a.L	1.6042	5.04e-11	fam126a.S	2.20918	0.0032512
			rps19.S	0.633772	0.0419675	nufip1.S	1.02314	0.00538784	stk38l.S	1.60183	6.1e-06	awat1.S	2.20762	0.00399406
			pex19.L	0.631638	0.00175286	cdk13.L	1.01639	2.05951e-06	lrrc56.L	1.60179	2.44e-06	myb.S	2.20712	0.00364365
			thoc3.L	0.631258	0.0123083	kiaa1549.S	1.01462	0.0458868	elovl7.L	1.60165	1.88e-13	cdh1.S	2.20668	4.31e-08
			hmgn3.S	0.630754	0.0419216	srsf6.L	1.01443	0.0029767	cdc42se2-like.2.L	1.59874	0.0218273	gprc5cl1.L	2.20356	4.87e-06
			cwc15.S	0.629604	0.00512398	btbd10.S	1.01342	0.00954384	rai14.L	1.59574	4e-08	sulf1.L	2.20228	6.1e-12
			sco2.S	0.629507	0.0262548	tbcel.L	1.0126	0.0161279	ddx1.L	1.59509	1.71e-08	esrrg.L	2.2019	0.00161791
			pdap1.S	0.629269	0.0320009	stard3.S	1.01232	0.000405841	hprt1.L	1.59484	0.0115882	MGC85240	2.20068	0.000444995
			gigyf1.S	0.628821	0.0480057	phf23.L	1.01053	0.00146787	gprc5cl1.L	1.59454	1.37e-05	xpo5.S	2.19829	7.65e-14
			eef1b2.L	0.628458	0.0252438	fgd4.L	1.01037	0.0125265	sphk2.S	1.59342	7.08e-08	adgrf5	2.19523	5.75e-05
			ak2.L	0.627446	0.0497255	dnaja4.2.S	1.01022	0.00802342	gpr161	1.59287	2.56e-05	mmp19.L	2.19381	0.00820976
			hmgn2.L	0.626814	0.00105519	mrpl48.S	1.00937	0.000125369	ier2.L	1.58579	0.000118265	mpp5.S	2.19354	0.00255812
			ccdc59.L	0.626714	0.0254702	zfp91.L	1.00622	0.0198424	skil.L	1.58502	0.0068002	mak16.S	2.19105	7.34e-14
			txnl1.S	0.62577	0.00831229	gpank1.L	1.00458	4.87238e-07	sox15.L	1.58381	4.33e-10	prelid3b.S	2.19099	4.38e-06
			ociad2.L	0.622945	0.00771207	MGC76328.L	1.00302	0.000503101	snta1.S	1.58263	4.48e-05	c1galt1c1.L	2.19004	6.65e-07
			rbm8a.L	0.62132	0.0145453	hnrnpa2b1.S	1.00245	2.02614e-06	tbx2.L	1.57793	5.56e-10	blcap.L	2.18943	1.16e-08
			rpl12.L	0.620051	0.0207057	romo1	1.00025	0.0180341	fth1.S	1.5737	1.3e-09	LOC108702376	2.18719	0.0385395
			acad9.S	0.619582	0.021378	bcdin3d.L	0.998734	6.45285e-05	oraov1.S	1.57331	4.07e-08	rnf222.S	2.18703	2.17e-12
			arl6ip4.L	0.61895	0.0491963	sirt7.L	0.998339	0.00149551	timm8a.L	1.57287	2.95e-06	sik2.L	2.187	0.00573719
			ppp1r16a	0.617385	0.028285	arpc1b.S	0.998226	0.001343	gbx1.S	1.57173	0.0323956	proser2.L	2.18534	0.00113037
			dohh.L	0.616279	0.0275713	pura.L	0.998072	0.000615947	htr3a	1.56948	3.26e-05	casp9.S	2.1835	9.75e-06
			phf13.S	0.615766	0.0186637	znf581.S	0.997956	0.0429428	ccdc68.L	1.56626	0.032863	tmem41b.L	2.18228	1.5e-12
			hax1.L	0.615712	0.0424268	tlr2	0.996605	1.32995e-05	cspg4.L	1.56552	0.000299726	fam136a.S	2.18225	3.29e-12
			naa30.S	0.614094	0.0151641	slc44a2.S	0.996072	0.00234412	pura.L	1.56411	1.48e-05	per2.L	2.17649	2.25e-16
			psmd6.L	0.614051	0.0128844	dnmbp.S	0.995921	0.00164495	sgsm3.S	1.56278	0.000111124	zfp91.L	2.17606	2.55e-09
			clta.L	0.612387	0.0220371	galnt10.L	0.994038	0.00410952	tmem238	1.56217	9.59e-05	upk3a.L	2.17293	4.16e-13
			tyk2.L	0.612078	0.00269885	sertad3.S	0.991369	0.0042222	strap	1.56002	2.37e-14	chmp4c.S	2.17203	1.12e-05
			iws1.S	0.610788	0.0252196	LOC108719545	0.99123	0.000201527	utp15.S	1.55925	2.02e-09	igbp1.L	2.17072	6.12e-14
			ppp2ca.L	0.608813	0.0200703	pick1.S	0.988727	0.0256825	serp1.S	1.55627	1.29e-07	shisa4.S	2.17036	0.0460402
			dtl.S	0.602362	0.0171921	snf8.S	0.98734	0.0197239	ccnt2.S	1.55214	3.17e-14	saysd1.L	2.16774	0.000231492
			srp9.S	0.602123	0.045602	lats2.L	0.987236	0.0103157	dusp1.S	1.55208	0.00173621	c1galt1.S	2.16723	0.0381397
			pgam5.S	0.601529	0.0389037	has-rs.S	0.986577	0.000845761	arg1.L	1.5512	1.27e-12	LOC108714685	2.1662	0.0226674
			paip2b.L	0.600142	0.00885453	ccdc117	0.98638	0.000326527	ccdc129.L	1.55073	0.0268718	arhgef3.2.L	2.16409	9.51e-05
			pfn1.L	0.59658	0.0141128	cry1	0.986331	0.0116702	gramd3.L	1.54886	3.03e-05	LOC108716397	2.16287	0.00571407
			snu13.S	0.59459	0.0163725	msl2.S	0.98551	0.00885946	igsf9.S	1.54836	8.99e-05	LOC108698139	2.16159	0.0216973
			gpatch4.L	0.592944	0.00276511	LOC495046	0.985078	0.00348989	fam212a.S	1.54672	9.14e-05	tmed9.L	2.16149	5.54e-13
			depdc1b.L	0.592027	0.0479417	ccnb1.2.S	0.984608	0.0238951	fam83d.S	1.54069	1.05e-10	ddi2.L	2.16066	4.94e-09
			deptor.L	0.591959	0.0157015	rrp1b.S	0.983908	0.000695653	ddx28.L	1.53949	7.11e-11	med9.S	2.15524	0.00123583
			trim14	0.591306	0.0424772	avpi1.L	0.983781	0.00300145	ncs1.S	1.53864	0.000195006	gpr160.L	2.15453	1.66e-08
			cox17.S	0.589806	0.0401276	gmppa.L	0.983239	0.00861054	znf532.L	1.53803	0.00982254	LOC100493194.L	2.1538	0.00949618
			immt.L	0.587841	0.014399	ier2.L	0.982367	0.0402797	avpi1.L	1.53774	2.76e-07	rftn1.L	2.15373	0.0163055
			lrrc58.S	0.587754	0.0410024	cxadr.L	0.981116	2.53747e-05	ubp1.S	1.53745	0.0364891	dcaf13.S	2.1528	1.46e-14
			fem1b	0.58678	0.0410986	ubl4a	0.978615	0.000466894	ddi2.L	1.53683	5.59e-05	wars2.L	2.15246	5.82e-06
			polr2d.L	0.585334	0.0184954	ptmap12.S	0.977992	0.0123715	sema4d	1.53641	3.43e-05	slc16a12.L	2.15181	0.022812
			znf653.S	0.584484	0.0187576	eef1a1o.S	0.977942	1.64749e-05	mief2.S	1.53585	2.09e-05	plekha6.S	2.15061	2.45e-05
			gltscr2.L	0.584279	0.0243018	tnk2l.L	0.977934	0.00925932	impad1.L	1.53504	1.28e-08	polr3f.L	2.15052	8.83e-10
			LOC108709581	0.579464	0.0336753	LOC108719553	0.977897	0.00186577	itpr3	1.53237	0.000255294	scnn1a.L	2.14907	7.48e-12
			ing2.L	0.577506	0.0248454	h1foo.S	0.977407	0.0486006	dusp6.S	1.53211	2.36e-05	ypel2.L	2.14867	0.0132687
			fam83h.L	0.57534	0.0426823	slc4a1ap.S	0.977143	0.0466486	tmem87b.L	1.53191	0.000659338	LOC108719008	2.1482	1.96e-15
			chtop.S	0.575262	0.0488416	xrcc1	0.975591	0.00754953	fam104a.S	1.53146	0.00429898	s100a2	2.14778	1.67e-09
			ric8a.L	0.574353	0.0265002	lysmd1.L	0.975412	0.017953	LOC108698216	1.53134	2.23e-10	saxo2.L	2.14466	0.011985
			mina.L	0.574258	0.0380766	rab11fip1.S	0.974048	0.00832766	cecr2.L	1.53029	6.98e-08	dlx5.L	2.14419	3.05e-07
			ventx2.1.S	0.573962	0.00520319	ankmy1.L	0.97393	3.46442e-05	slc16a3.L	1.53025	6.42e-12	grk6.S	2.14282	4.97e-09
			eif4ebp2.S	0.572289	0.0172377	atp6v1d.L	0.973732	0.00613469	ptgfrn.S	1.53018	6.55e-08	nwd2.L	2.14266	0.00921074
			rack1.S	0.567757	0.0338842	lin28b.L	0.971338	0.0380945	esr-5.L	1.5296	0.00355221	fgf20.S	2.14246	0.0378172
			pak1.L	0.565895	0.0264943	pex13.L	0.969977	0.000247076	mxi1.L	1.52943	7.3e-10	axl.S	2.14149	0.000745942
			u2af1.S	0.565834	0.015336	c10orf88.L	0.968911	5.54807e-05	MGC52827	1.52751	0.000242951	fam3a.L	2.13631	2.2e-08
			ccdc137	0.562822	0.0385518	MGC81163	0.966926	0.0257632	park7.L	1.52654	0.0375104	egr1.S	2.13542	0.0432224
			snrnp27.S	0.561026	0.0472548	kdm2b.L	0.966737	0.000893639	klhl36.L	1.52586	0.00624619	ociad2.S	2.13512	0.0211072
			selenow1.L	0.557428	0.0382501	prrt4	0.965773	0.00201898	ehbp1l1.S	1.52582	0.0198696	tmem101.S	2.13441	9.62e-08
			ilf2.S	0.553576	0.0425702	ptgfrn.S	0.964858	0.00916772	c5orf51.L	1.5243	0.00684569	MGC131348	2.13394	0.000381228
			cldn7.L	0.552843	0.0226767	sbspon	0.963263	0.0398329	sirt3.2.L	1.5241	5.3e-06	sall1	2.13307	8.83e-06
			ormdl2.S	0.551231	0.0438078	LOC108699910	0.963024	0.0490942	dmxl1.L	1.52371	0.000382742	fdxacb1.L	2.13113	1.5e-05
			mettl2b.L	0.551059	0.0108496	exosc4.S	0.962144	0.000552409	robo3.S	1.52211	0.0365988	slc35a2.S	2.13073	1.03e-10
			ccdc124.L	0.550165	0.0163504	znf653.S	0.961196	4.98181e-06	il17rd.S	1.52123	1.26e-12	exosc6.L	2.12835	1.74e-13
			LOC108703769	0.55001	0.0470794	fam219b	0.960602	0.00514227	rbm24.S	1.52115	0.00053189	rab5c.L	2.12621	1.08e-10
			arfgap1.S	0.549961	0.0168496	LOC108696887	0.959611	0.0139946	setd4.L	1.51921	0.00078018	kctd12.L	2.12492	0.00482244
			sap18.L	0.546129	0.0334213	timm17a.S	0.95766	0.00450192	nasp.S	1.51911	1.52e-07	sytl2.S	2.12413	2.6e-06
			phf5a.L	0.544679	0.0440636	tbc1d30.L	0.955463	0.0130154	dab2ip-like.L	1.51902	0.000706939	klhl36.L	2.12387	4.1e-05
			znf384.L	0.544594	0.0209804	ipmk.L	0.954562	0.00179482	tm9sf2.L	1.51898	1.96e-14	atad1.L	2.1237	8.67e-10
			hnrnpa1	0.542385	0.0330239	hspa5.S	0.953603	0.0269941	ccdc84.S	1.51879	8.66e-09	tbx3.S	2.12331	5.4e-05
			prmt1.S	0.541767	0.0194365	rnf103.S	0.95105	0.0302224	pdlim4.L	1.51846	9.24e-05	rbm38.L	2.12223	0.001443
			c19orf43.L	0.541012	0.0194833	eif6.S	0.949149	0.000520767	mtx3.L	1.51827	0.045294	itga6.L	2.12109	2.95e-12
			mycl.S	0.537769	0.0434709	gatad2a.S	0.949038	0.00312775	1700037h04rik	1.51692	2.21e-06	prph.L	2.11822	1.75e-07
			mapk1ip1l	0.533798	0.0443944	chd2.L	0.948672	0.026934	afmid.L	1.51495	0.0113967	plpp5.L	2.11706	1.03e-06
			snu13.L	0.521439	0.019524	cdk12.S	0.945835	0.0473272	romo1	1.50998	0.000850212	Xelaev18024228m	2.11439	5.67e-09
			snrpb.L	0.520965	0.00746488	b3gnt2.L	0.944935	5.68072e-05	gmps.L	1.50983	5.99e-09	hes8.S	2.11432	0.000323498
			usp39.L	0.520047	0.042726	cnbp.L	0.944725	0.000725303	pick1.S	1.507	6.24e-05	LOC108718425	2.1139	0.0086351
			alyref.L	0.518683	0.0194365	blcap.L	0.943731	0.0352041	septin9.L	1.50421	0.00052256	usp16.L	2.1118	6.86e-20
			tsc22d1.L	0.509985	0.0244256	nipal4.L	0.943395	0.0136862	Xelaev18002911m	1.50393	0.0027934	zbtb46.L	2.10969	3.51e-08
			hmgb2.S	0.502055	0.0356401	LOC108719420	0.941404	0.0473664	cant1.L	1.50334	8.57e-10	timm17a.S	2.10943	6.14e-14
			eef1a1.L	0.497032	0.0451054	ptbp1.S	0.940973	0.0134338	pigw.S	1.50329	2.65e-05	lrrc56.L	2.10787	1.31e-08
			tada3.L	0.493685	0.0249582	xrcc1.S	0.940735	5.6075e-06	golph3l.L	1.50315	2.73e-06	cog1.S	2.10539	1.22e-08
			prpf18.L	0.493393	0.0305795	dolpp1	0.939462	0.00735472	mcl1.S	1.50241	3.99e-07	Xelaev18000483m	2.10531	0.000335737
			ftmt.S	0.491633	0.0132789	hic2.L	0.939278	0.0105022	erbb2.S	1.50117	9.67e-07	rbm24.S	2.10489	2.31e-05
			cox5b.1.L	0.491356	0.0482436	fam63a.L	0.939253	0.0465609	exosc6.L	1.50013	5.61e-10	vimp.L	2.10297	7.41e-11
			szrd1.S	0.490887	0.049075	LOC108705281	0.937927	0.00771883	npm3.S	1.49985	4.49e-08	sco1.L	2.10165	3.99e-06
			taf7.L	0.489498	0.024415	arpc5l.L	0.937435	0.000146093	nr6a1.S	1.49926	0.00144277	capn8.2.L	2.10098	7.45e-08
			MGC52578	0.488232	0.0394021	arglu1.L	0.937381	0.0125812	Xetrov90025257m.S	1.4979	0.0163811	atp6a1	2.10082	4.23e-09
			mlf2.S	0.483053	0.0266796	gas6.L	0.933945	0.00544339	ggt6	1.49602	0.0134886	arhgef3.2.S	2.10021	0.00014069
			chchd3.S	0.480032	0.0399456	egln3.L	0.932223	0.0284587	slc35a2.L	1.49595	6.5e-09	LOC108706358	2.09897	0.020533
			eif3j	0.477941	0.0407094	rpl23.S	0.932011	0.000106757	polr3f.L	1.49559	0.000203681	uck2.S	2.09626	7.14e-09
			gnl3l.S	0.475319	0.0462841	scrn3.L	0.929785	0.00339484	fam136a.S	1.49468	3.4e-06	1700007k13rik	2.09581	1.78e-05
			ppp2ca.S	0.468899	0.0484958	lsm3.S	0.928403	0.00463991	junb.L	1.49372	0.000102403	LOC108704302	2.09565	0.000450363
			smarce1.L	0.464835	0.0426823	ankrd10.S	0.92837	0.0268206	pcdh20.L	1.49308	0.038669	LOC108717666	2.09451	0.0124917
			tpx2.L	0.4632	0.0388046	srsf2.L	0.927943	3.71119e-05	znf710.L	1.49111	3.96e-06	Xetrov90008961m.L	2.09431	0.00654366
			psmc5.L	0.456399	0.0443468	bcorl1.L	0.925589	0.0431732	mdk.S	1.48948	0.000105851	myo5b.L	2.09198	2.46e-06
			hnrnpab.L	0.423821	0.0407205	hn1.L	0.925256	0.0475999	cks1b.L	1.48702	3.79e-07	Xelaev18027889m	2.09091	3.96e-06
			dnttip2.L	0.409826	0.046414	alkbh5.L	0.922648	0.00155764	mfsd6.S	1.48551	0.0151088	sec14l3.S	2.08877	0.00014336
			pttg1ip.1.L	-0.468693	0.0471424	arrdc1.S	0.920851	0.0465609	pim1.L	1.48519	2.26e-08	kmt2c.L	2.08823	1.48e-05
			golga4.L	-0.476611	0.0401944	erf.L	0.920837	0.000581665	arhgap23.L	1.48497	3.07e-05	znf750.L	2.0873	4.07e-14
			cask.L	-0.490979	0.0356114	cfap46.L	0.920524	0.0465284	zfp36l1.S	1.48293	3.12e-08	snx31.L	2.08415	1.12e-05
			csnk1g3.S	-0.505532	0.0230967	hist2h3c.L	0.916294	0.0149292	katnb1.S	1.4822	9.29e-08	tuba1a.L	2.08112	0.000287006
			spag5	-0.511833	0.0456552	pknox1.L	0.915486	0.0221636	cope.S	1.47886	1.81e-09	pik3r2.S	2.08068	1.71e-13
			spint2.L	-0.520318	0.01497	kansl1	0.914988	0.0309698	ndc1.L	1.47808	1.84e-05	LOC495046	2.08049	5.64e-10
			kif21a.L	-0.529332	0.0303388	rgs19	0.914834	0.00137262	Xelaev18001443m	1.47807	0.000209817	ifrd2.S	2.07997	5.71e-09
			otulin.S	-0.529578	0.0357109	szrd1.L	0.913915	0.00207564	kpna2.S	1.47708	0.000137848	rpusd4.L	2.07795	2.86e-11
			cpt2.S	-0.536513	0.0424268	isg20l2.L	0.91251	0.0058937	znf569.L	1.47673	2.2e-06	txndc11.L	2.07788	4.13e-07
			csnk1g3.L	-0.539158	0.0481996	znf384.L	0.911959	2.6316e-05	emc8.S	1.47664	5.28e-09	mos.L	2.07756	7.71e-07
			pdpr.L	-0.545701	0.0372862	fhdc1	0.910918	0.0473272	prph.L	1.47648	0.00326007	slc39a7.L	2.07665	6.26e-12
			myo1c.L	-0.547787	0.0137514	irf2bp2.L	0.910588	0.000577576	prpsap1.S	1.47437	0.000717397	fam13c.S	2.07649	0.013301
			ptp4a1.L	-0.556139	0.045602	rplp1.L	0.908147	0.0169889	guk1.S	1.47421	6.92e-09	gale.L	2.07514	0.000486462
			adarb1.L	-0.558433	0.0314727	cd82.L	0.905918	0.0431732	mab21l3.S	1.47104	0.00087331	fam83g.S	2.07467	5.12e-07
			ssu72.S	-0.561162	0.0408622	fam160b2.L	0.905817	7.73267e-05	rab11fip4	1.47018	0.00402655	rev3l.S	2.07457	0.00570077
			ints6.L	-0.565724	0.0472986	slc16a3.L	0.904656	7.40261e-08	ndufc2.S	1.4701	2.51e-10	ltbr	2.07045	0.0145985
			arhgap17.L	-0.568855	0.0453627	midn.L	0.902956	0.0324694	hspbp1.L	1.46785	3.55e-06	LOC108711791	2.06937	0.0290967
			kpna4.L	-0.569915	0.0355343	jph1.S	0.900164	0.0115077	LOC108710484	1.46423	0.000130071	lgals8.S	2.06796	0.00371858
			gna14.L	-0.571729	0.0102177	mllt10.L	0.899574	0.00406432	nrbp2.L	1.46064	0.0488509	pgm3.L	2.06701	2.11e-06
			Xelaev18002447m	-0.574099	0.0492462	proser1.S	0.899386	0.0340278	dmac1	1.45917	0.000853716	slc4a1.S	2.0664	0.0132031
			serinc3.L	-0.57442	0.0117291	LOC108698339	0.899174	0.000799652	atad3a.S	1.45909	0.000467947	aspg.L	2.06584	1.38e-09
			mettl25.L	-0.575846	0.0496457	klhl28.S	0.898139	0.0354792	cdk13.L	1.45831	2.31e-12	rrn3.L	2.06537	2.61e-15
			ube2h.S	-0.582609	0.0273138	mrps24.S	0.897832	0.00802497	galnt10.L	1.45728	1.32e-09	elovl7.L	2.06425	3.23e-09
			arih1.S	-0.586695	0.00947072	MGC154819	0.896653	0.0298246	manf.L	1.45633	1.65e-07	nfe2l2.L	2.06288	0.00182418
			ahcyl2.S	-0.589332	0.0230845	znf282	0.896264	0.000975397	xylt2.L	1.45622	0.00667703	trap1.S	2.06008	1.79e-14
			tpp1.L	-0.5898	0.0483728	tmed9.L	0.894606	0.040197	rrp1b.S	1.45616	8.75e-10	ssb.L	2.05945	1.73e-17
			mast2	-0.591051	0.0437497	mief1.L	0.893448	0.0144077	LOC108717642	1.45371	0.000374977	msn.S	2.05925	0.0219492
			pdlim7.L	-0.591345	0.0407205	kiaa1429.L	0.892871	0.00509378	hkdc1.S	1.45351	0.000656776	LOC108713163	2.05846	0.019235
			pafah1b2.L	-0.591812	0.0498256	ventx2.1.S	0.892585	0.000139846	bub3.S	1.45296	5.18e-11	c10orf88.L	2.05685	2.1e-10
			zcchc7.L	-0.597509	0.0233882	znf268.L	0.891395	0.00994671	cep57.S	1.45203	0.0018963	polr2j.L	2.05597	0.000128196
			tspan3.S	-0.602907	0.0227944	MGC68811	0.890886	0.00988763	LOC108701212	1.45202	1.17e-10	coq10a.S	2.05594	9.41e-05
			tdrp.L	-0.602952	0.0153073	LOC108695696	0.889603	0.000686546	mrps25.L	1.45047	0.0378019	pafah1b2.S	2.05498	1.49e-11
			mgat4a.S	-0.610105	0.0135556	rbm5.S	0.887462	0.0240838	jagn1.L	1.45025	5.2e-08	klf3.L	2.05299	0.00145639
			scml2.L	-0.610837	0.0258157	sptlc2.L	0.887071	8.3434e-05	tmem19.L	1.44889	0.0412371	arl8b.L	2.05275	5.19e-11
			epc2.L	-0.611065	0.0293654	foxred2.L	0.88697	0.0197421	nus1.S	1.44805	4.31e-07	LOC108717259	2.05266	0.0290499
			gmfb.L	-0.6138	0.0445824	suox.S	0.886708	0.035473	snip1.L	1.44634	1.1e-08	chsy1.S	2.05156	0.000576277
			fndc3a.2.S	-0.615184	0.00679732	taf1a.L	0.886445	0.0349432	spag8	1.44549	0.000126023	arid3a.S	2.04829	2.82e-17
			sgol2	-0.616533	0.0164775	cyp27a1	0.886058	0.0233224	eif4a1.S	1.44533	3.97e-18	hivep1.L	2.0471	3.59e-05
			ppp2r5c.L	-0.61891	0.0132686	rpf1.S	0.886041	0.00521855	LOC108698556	1.44423	0.0108409	LOC108697646	2.04567	7.09e-11
			birc6.L	-0.619102	0.0496225	tmub1.S	0.884869	0.00246733	alg6	1.44418	0.038669	ssr3.L	2.04438	3.09e-07
			ahctf1.L	-0.620431	0.0169925	gdpd2.L	0.884315	0.0085207	minpp1.L	1.44382	0.0307176	Xelaev18014171m	2.04395	1.53e-06
			fam214a.L	-0.623612	0.0117282	rras2	0.882269	0.0168346	notch3	1.44364	1.95e-05	esco1.L	2.04295	4.59e-10
			wdr91.L	-0.624287	0.0419216	ccdc43.S	0.881893	0.0033778	mex3b.L	1.44314	1.22e-08	spock3	2.04181	0.00356978
			cdc42se2-like.1.S	-0.62879	0.0397394	top3a.L	0.878953	0.0239876	loc100487575.L	1.44232	0.00721818	tiam1.S	2.04074	3.87e-16
			gpr157.L	-0.630739	0.00785398	ccdc71l.L	0.877335	0.0296086	LOC100490559.S	1.43923	0.0445968	gatad2a.S	2.03859	1.07e-13
			p4hb.S	-0.632326	0.0413876	ndufc2.S	0.875369	0.00408151	lmod1.S	1.43865	0.00951531	cct7.S	2.03386	8.64e-08
			znf850	-0.639148	0.00756266	cgn.L	0.874989	0.00802497	tpbg.S	1.43775	0.00612014	mgat1.L	2.0325	1.24e-21
			scrib.S	-0.639256	0.047671	srsf7.S	0.874769	5.56991e-06	rrp12	1.43668	0.000954912	slc6a9.L	2.0323	0.00323267
			rnf220	-0.639388	0.0224259	emc7.S	0.874519	0.00396954	aspg.L	1.43645	0.00299419	utp15.S	2.03096	8.25e-18
			usp36.S	-0.639539	0.0435715	kif22.L	0.873928	0.00538348	fam193b.L	1.43617	0.000312883	ndufa1.L	2.02986	0.000391135
			med16.S	-0.641693	0.0151427	MGC81970	0.873451	0.00113468	nkain4.S	1.43616	0.0493953	LOC108700979	2.02853	0.00182902
			npm1.L	-0.642384	0.000343207	nasp.S	0.871864	0.0126034	ndst1.L	1.43573	6.63e-16	slc25a25.S	2.02847	3.08e-07
			pop1-like.L	-0.648399	0.00280064	mknk2.S	0.870916	1.81193e-05	lmo7.L	1.43468	5.49e-13	katnb1.S	2.02813	7.48e-06
			srsf7.L	-0.648594	0.00627108	ticrr.L	0.870575	0.00347865	srcap.L	1.4334	2.29e-08	bcat1.L	2.02778	0.000199782
			heatr5a.L	-0.651515	0.0265932	mfsd6.L	0.870349	0.0494203	sav1.L	1.43318	9.7e-09	igf1r.L	2.02606	1.88e-14
			git2.L	-0.651778	0.0260194	naa30.S	0.870122	0.0003138	zbtb3.S	1.43285	0.00391292	ankmy1.L	2.02448	4.45e-09
			dmd.1.S	-0.654271	0.0254028	MGC131302	0.866969	4.96024e-05	exosc4.S	1.43228	4e-05	Xelaev18000380m	2.02257	0.00398632
			tram1.S	-0.663513	0.0126746	lpcat4.S	0.865042	0.000256755	dhps.L	1.43182	0.00117616	trim13.L	2.02011	0.0121052
			atl2.L	-0.668064	0.006088	nos1ap	0.863784	0.00209229	p2ry11.S	1.43112	0.00820328	ccn1l.S	2.01946	3.82e-10
			arntl.S	-0.668182	0.0088844	dctpp1.L	0.863205	0.0145654	ikzf4.S	1.43104	0.000205767	stx5.S	2.0179	2.12e-10
			bcor.S	-0.669438	0.0254022	jagn1.L	0.862027	0.00332099	chtf8.S	1.43007	0.0358844	hebp1	2.01695	0.0453327
			atp13a4.S	-0.670643	0.0243177	alkbh5.S	0.861782	0.0209742	mpdu1.L	1.42985	8.47e-08	egr1.L	2.01414	0.044997
			c18orf8.L	-0.670663	0.00831229	shroom2.L	0.859485	0.00143174	LOC108719008	1.42796	3.96e-09	ppp1r3b.L	2.01039	3.1e-06
			smad4.1.S	-0.672258	0.0309043	cdc14b.S	0.859344	0.000982563	naa30.S	1.42625	8.76e-09	akap9.S	2.00912	4.27e-07
			casp8ap2.L	-0.672258	0.0153073	c2orf42.L	0.855218	0.0191185	grx5	1.42622	1.53e-08	gabbr1.S	2.00906	0.0294848
			timm23.L	-0.674526	0.018015	rps10	0.853582	0.00220166	shroom3.L	1.42559	0.00030028	dnlz.S	2.00813	9.39e-07
			chpt1.L	-0.674687	0.023857	dgat1.L	0.852621	0.0204839	LOC108712891	1.42493	2.59e-05	ccdc63.S	2.00712	8.59e-05
			por.L	-0.674915	0.0433283	LOC108700788	0.852309	2.55787e-06	ap1m2.S	1.42468	9.69e-09	cenpn.L	2.00603	1.93e-11
			adgrl2.L	-0.680108	0.00749612	rpl7a.L	0.851352	0.000494343	mrto4.L	1.42368	2.03e-07	LOC108718134	2.00565	1.67e-10
			nup210.L	-0.680449	0.0234886	erbb2.S	0.850786	0.0178035	LOC108704478	1.42366	0.00200669	anapc10.L	2.00337	0.0186025
			nfkbia.L	-0.681634	0.00887712	paxip1.S	0.850559	0.00379674	c14orf37.L	1.42353	0.0289043	sbk1.L	2.00333	0.00373755
			zbtb45.L	-0.683209	0.0447437	elmod2.L	0.850431	0.038196	lats2.L	1.42318	1.61e-07	surf4.2.S	2.00279	8.25e-10
			diaph3.L	-0.68535	0.0353778	sdhaf1	0.850361	0.0123788	tmem41b.L	1.42181	5.3e-05	LOC108719412	2.00127	0.00482244
			hyou1.S	-0.685782	0.0176145	sirt3.2.L	0.849205	0.00163652	tprn.L	1.42178	0.000234259	bmper.L	2	5.63e-11
			zufsp.S	-0.685886	0.0291884	c12orf45.S	0.849023	0.0251772	alkbh5.L	1.41996	2.82e-07	cep135.L	1.99974	5.21e-18
			prickle4.S	-0.687025	0.030059	sec14l3.S	0.848975	0.00306885	rad17.L	1.4199	9.99e-08	ydjc.L	1.99826	1.48e-06
			pitpnb.2.L	-0.687141	0.000143946	MGC76328.S	0.848891	0.0274583	herpud1.L	1.41969	7.91e-09	sft2d3.S	1.9979	6.59e-06
			pik3c2a.L	-0.688163	0.0204798	prkd1.L	0.848275	0.0255027	gse1.S	1.41926	0.000195006	sptlc3.L	1.99726	0.0283077
			rb1cc1.S	-0.688436	0.045602	cks2.S	0.847989	0.00430681	plk1.S	1.41749	1.44e-08	zfp36.L	1.99724	6.67e-08
			bcap29.L	-0.691669	0.00856475	pbk.L	0.84702	0.0329501	lin28b.L	1.41499	0.0023942	pdia6.L	1.99662	5.38e-06
			lyrm7.L	-0.693916	0.0144465	slc35a3.2.S	0.845778	0.00217264	fut11.L	1.41337	0.00252108	scel.L	1.99518	5e-07
			zfp729b	-0.695227	0.038277	ndufa8.L	0.845417	0.00948102	flvcr1.S	1.41252	0.000324672	rcor1	1.99438	4.11e-09
			c7orf60.S	-0.695408	0.000807534	psmg1.L	0.843391	0.000134581	snx11.L	1.41191	0.00081882	camsap3.L	1.99407	6.05e-07
			mbip.L	-0.699238	0.0214786	pdia6.L	0.84331	0.00119118	g67.L	1.41103	0.0176642	slc44a3.L	1.99265	3.1e-09
			pole.L	-0.699997	0.047518	Xelaev18001443m	0.841687	0.01141	xab2.L	1.41009	6.13e-09	MGC132236	1.99143	8.72e-10
			commd4.S	-0.70851	0.0418102	ubald2-b	0.841249	0.00293929	b4galt5.L	1.40869	0.00126307	nus1.L	1.99095	3.68e-10
			mfge8.L	-0.70927	0.0064931	irf2bpl.L	0.840795	0.04936	Xelaev18024221m	1.40865	0.0485741	tefm.L	1.99083	0.000698141
			svil.L	-0.710201	0.0302444	rpl36.L	0.840211	0.0129653	dnajb12.L	1.40825	7.74e-10	wasf3	1.98977	0.00234402
			fgfr1op.L	-0.714076	0.025408	ip6k2.S	0.839941	0.00752882	cct7.S	1.40716	0.00338253	loc548390.S	1.98926	0.00278333
			plxnb2.L	-0.716982	0.0203938	c19orf52.L	0.839245	0.00195772	LOC108711842	1.40663	0.0367452	isca2.L	1.98912	0.0346286
			znf782.S	-0.717997	0.0108587	dvl3.L	0.839187	0.000354647	ripk1.L	1.40591	0.00809417	dnajc10.S	1.98848	3.09e-06
			ell2.L	-0.721273	0.000983607	nudt9.L	0.838225	0.0200592	arvcf.S	1.4054	1.69e-07	gna14.S	1.9883	7.12e-10
			elavl1.S	-0.723718	0.015122	ccnl2.S	0.837752	0.0277399	mief1.S	1.40512	5.85e-06	LOC108714033	1.98666	7.53e-05
			aprt	-0.724457	0.0214643	tor1a.S	0.836118	0.00112117	coq10b.L	1.40361	4.79e-06	patl2.L	1.98657	0.0130417
			dnaaf1.S	-0.729667	0.00222384	slc33a1.S	0.835981	0.00847721	uspl1.S	1.4034	0.000457005	gorab.L	1.98618	1.32e-08
			espl1.L	-0.729767	0.0401543	polr3h.L	0.835849	0.0262108	LOC108698194	1.40323	0.0255649	prrg4.S	1.98315	4.49e-11
			ube2q2.L	-0.730561	0.0230582	psma7.L	0.835263	0.00246122	cep290.L	1.40278	0.0121249	gtf3c4.L	1.98238	1.51e-12
			trip11.L	-0.732325	0.0020457	upk1a.L	0.835184	0.00030119	arnt.L	1.40242	0.000218642	fkbp4.L	1.98177	2.25e-13
			tmem185a.L	-0.734776	0.00658435	ier5.S	0.834515	0.0217072	ndufa1.L	1.40203	0.0183531	znf569.S	1.98009	6.47e-05
			traf2.L	-0.734801	0.0433415	mphosph8.L	0.833281	0.000600698	dnajb9.S	1.40093	0.00355403	hyou1.L	1.98001	2.1e-05
			pvrl1-like.2.L	-0.736165	0.019117	slc9a3r1.L	0.832343	0.000660513	tusc2.S	1.39986	0.00327931	slc35a5.S	1.97993	1.64e-06
			hcn2.S	-0.737687	0.0152037	snx31.L	0.831647	0.0335279	xpo5.S	1.39968	6.79e-05	zfand2a.L	1.97613	0.00292053
			rad51d.L	-0.739501	0.00404445	ankrd10.L	0.831631	0.033977	zbed6cl.S	1.39962	7.91e-06	slc26a4l.L	1.97609	0.0074775
			tmem248.S	-0.741906	0.00473282	hnrnpdl.L	0.831548	6.28537e-07	top3a.L	1.39844	6.11e-06	acer3.L	1.97378	7.52e-16
			tes.L	-0.743101	0.0485395	lcmt2.L	0.831109	0.0478817	ssb.L	1.39644	3.43e-08	eif4e.L	1.97251	1.33e-21
			katnb1.L	-0.744935	0.00379018	hspa9.S	0.83108	0.0380233	LOC108696887	1.39641	3.46e-05	bid.S	1.96942	2.22e-06
			ppp1r12a.S	-0.746407	0.0241577	utp15.S	0.828335	0.00778157	ccdc103	1.39508	0.034766	dennd3.L	1.96938	3.9e-11
			klhl15.L	-0.747971	0.0178889	arf1.L	0.82833	0.0249292	g0s2.L	1.39388	0.047351	dll1.L	1.96927	1.62e-07
			mcph1.S	-0.748221	0.0205968	elovl7.L	0.826515	0.000517456	phospho2.L	1.39368	5.47e-06	wdr77.S	1.96842	1.39e-14
			MGC68956	-0.751408	0.0425732	rps9	0.826062	0.000790124	nfe2l1.S	1.39258	7.39e-07	spata5l1.L	1.9678	8.95e-05
			cand1.L	-0.754663	0.0214428	rpf1.L	0.82577	0.00338471	bmp7.2.S	1.39224	0.000428602	rab6b.L	1.96656	0.0375341
			c11orf57.L	-0.755242	0.00851321	exosc6.L	0.825201	0.00287651	eed.L	1.39207	3.56e-10	nkain4.S	1.96608	0.00228263
			dgcr8	-0.755263	0.0215514	c2orf42.S	0.825153	0.0463674	txndc9.L	1.39196	1.3e-05	gpr143.S	1.96512	0.000824557
			rce1.S	-0.755282	0.00702753	mrto4.L	0.824535	0.00387914	c1galt1c1.L	1.39074	0.000808709	capns2.S	1.96488	8.69e-12
			cep192.L	-0.757404	0.00387083	sbk1.L	0.822322	0.0114584	nufip2.L	1.39048	4.68e-08	acaa2.L	1.96474	0.0045215
			pcdh1.S	-0.758926	0.00649003	ventx2.1.L	0.821371	0.018169	kdf1.S	1.38962	9.23e-05	xbp1.S	1.9644	1.45e-11
			haus6.S	-0.762847	0.00553021	lsm11.S	0.821326	0.00608292	aqp4	1.38701	0.00189227	col17a1.L	1.96394	0.0102702
			naglu.L	-0.768339	0.0424268	fkbp1a.L	0.820397	0.0455038	cry1	1.38697	1.36e-06	mtfr1.L	1.95779	2.55e-06
			cnn3.S	-0.768966	0.00918453	plk4.L	0.820228	0.0207998	LOC108703771	1.38679	0.0263524	mfsd11.S	1.95738	1.72e-07
			sdc4.S	-0.769693	0.00252904	ybey.L	0.819351	0.0490883	loc108718659.S	1.38638	0.000226221	slc39a14.L	1.95604	0.00086777
			tspan13.S	-0.770461	0.0361489	LOC108698716	0.818587	0.0296141	ulk1.S	1.38624	0.0179976	sipa1l3.L	1.95378	1.3e-05
			kbtbd3.S	-0.770471	0.0088844	ccnl2.L	0.818576	0.0471234	b3gnt2.L	1.38581	7.91e-09	rrp1b.S	1.94784	4.92e-14
			kif15.L	-0.773339	0.0102177	psma7.S	0.818178	4.44148e-05	ip6k2.S	1.38505	8.25e-05	LOC108698396	1.9463	1.09e-05
			inadl.L	-0.782395	0.0277609	lamtor2.L	0.817803	0.0335982	ubl4a	1.3835	5.41e-05	rarres1.L	1.94617	2.1e-05
			fam46c.L	-0.783844	0.00266692	gmps.L	0.817526	0.0437656	ankib1.L	1.38308	8.88e-05	ubl3	1.94301	4.54e-08
			chmp1a.S	-0.786509	0.0259436	ing2.S	0.816385	0.0150119	cldn12.L	1.38303	0.00302017	sptlc2.L	1.94232	4.76e-16
			senp1.L	-0.788144	0.0358669	syngr2	0.814007	0.00571078	LOC108710290	1.38278	0.00628592	naa15.L	1.9423	1.96e-12
			prickle1.L	-0.788809	0.0406083	rhno1.S	0.813069	0.0139251	timm17a.L	1.38202	0.000201639	gfod1.S	1.94185	0.00126971
			rnaset2.L	-0.789544	0.0433148	pygl.L	0.812886	0.0084766	MGC83169	1.38111	0.0167275	wdr89.L	1.94118	7.18e-18
			arhgap32.S	-0.791734	0.0089317	c17orf75.L	0.812412	0.0406058	prrt4	1.38044	0.000193583	LOC108711517	1.94115	1.42e-12
			snx17.L	-0.794569	0.00225919	LOC108702579	0.811051	0.0460503	Xelaev18003310m	1.3803	2.13e-05	ammecr1l.L	1.94083	0.00557477
			plekhg4.L	-0.794843	0.0254022	rpl17.S	0.810042	0.00406363	ccdc173.L	1.37976	3.49e-05	LOC108717946	1.93927	0.014473
			rab20.S	-0.796178	0.0414627	eif4a1.L	0.808156	0.000234685	cpsf4.S	1.37972	2.52e-10	spry1.L	1.93795	0.00569405
			spag1.S	-0.797194	0.00135487	hspa8.S	0.804917	0.0335887	eef1a1o.S	1.37898	2.77e-12	septin9.L	1.93133	2.16e-07
			ephb3.S	-0.797837	0.0258157	cd3eap	0.80452	0.00433427	kndc1.L	1.37782	1.12e-05	LOC108695571	1.92979	0.0391775
			mvb12a.L	-0.79835	0.00261676	rps27a.S	0.804239	0.0305358	gapdh.L	1.37728	2.53e-11	arnt.L	1.92881	3.77e-06
			brap.L	-0.800015	0.00196517	mettl7a.S	0.803784	0.0434667	c14orf79.S	1.37666	0.0224151	pygm.S	1.92632	7.61e-05
			ptar1.S	-0.802577	0.00750417	rpl19	0.803652	0.0142807	arf1.L	1.37646	5.25e-08	wdr12.S	1.92585	2.23e-15
			vezf1.L	-0.805521	0.025729	gid8.L	0.802689	0.0204839	mgat1.L	1.37622	8.99e-13	gas1.L	1.92447	0.00354222
			lcor.L	-0.80583	0.00176464	cirbp.S	0.79989	0.00393629	e2f6.S	1.37476	3.18e-09	uba5.S	1.9241	6.92e-09
			uchl5.S	-0.80792	0.0151272	endod1.L	0.799598	0.0227647	emc7.S	1.37473	1.5e-06	csta	1.92308	0.0112419
			sema3c.S	-0.808675	0.0355343	uqcr10	0.797644	0.0480716	crb3.S	1.37313	0.000202133	LOC108698194	1.92239	2.77e-05
			uvssa.L	-0.812885	0.01817	htra2.S	0.797627	0.0423055	glrx2.L	1.37259	5.71e-07	dus4l.L	1.92177	4.21e-10
			chd1.S	-0.816392	0.00223862	fam3c.S	0.796674	0.0439485	ccdc167.S	1.37237	3.93e-06	LOC100192369	1.92151	0.00919282
			sgms1.L	-0.816453	0.00842602	luc7l2	0.796021	0.00293653	arid3a.S	1.37124	1.13e-13	mars2	1.91852	4.28e-09
			ankrd50.L	-0.816651	0.00362024	nagk.L	0.795673	0.0486317	s100a2	1.37122	7.59e-05	efnb3	1.91703	0.00483222
			tex10.S	-0.81867	0.000792539	LOC495950	0.795653	0.00671372	dazap1.L	1.36836	0.000841889	LOC108696893	1.91668	0.0360874
			snx3.L	-0.819721	0.0117793	gpr143.L	0.793922	0.0324094	acer3.L	1.36832	8.46e-10	myt1.L	1.91645	3.84e-05
			plxnb3.S	-0.82515	0.0484235	tada3.S	0.793398	0.0199567	tmem259.S	1.36745	0.000387103	LOC108710068	1.9162	0.000142542
			atl2-like.S	-0.826348	0.00691969	gadd45gip1.S	0.792424	0.0120074	fem1b	1.36307	9.34e-09	rrp15.L	1.91606	1.06e-16
			kctd3.S	-0.828369	0.0133389	myef2.L	0.791378	0.000339514	sox7.S	1.36239	0.00968972	tmem64.S	1.91592	1.68e-05
			atxn2.S	-0.828777	0.0301321	hyls1.L	0.791032	0.000975397	elmo1.L	1.36234	0.000212858	sp5.L	1.91584	1.14e-05
			msi1.L	-0.828851	0.00201893	supt7l.L	0.790391	0.0259341	yars2.L	1.36157	0.0291711	MGC83169	1.9157	0.00195049
			stat3.1.L	-0.829203	0.0299031	ctf1	0.789296	0.00620725	hap1.L	1.36057	4.29e-09	lysmd1.L	1.91557	0.00475793
			gnptg.L	-0.829259	0.0198659	kif11.S	0.788829	0.0170741	parp3.L	1.36051	0.0402925	Xelaev18001309m	1.91491	0.016399
			ap2b1.L	-0.829849	0.00196517	slc35b1.S	0.788	0.0461423	sco1.L	1.36035	2.36e-05	LOC108719789	1.91464	1.13e-08
			prkar2b.S	-0.830178	0.00365111	znf554.L	0.787352	0.00825315	gpank1.L	1.36034	8.43e-07	gnptab.L	1.91419	1.01e-05
			gatad2b	-0.8313	0.0137514	caprin2.S	0.787306	0.00300194	phldb1	1.36005	0.000304242	pias2.L	1.91252	3.99e-05
			stag2	-0.831415	0.0020457	slc35a2.L	0.786237	0.0259341	bicd1.L	1.35982	4.52e-06	arhgap42.S	1.90965	0.0119245
			papolg.L	-0.833271	0.0350654	rhoa.2.S	0.783874	0.000170284	egln3.S	1.3586	0.000817135	LOC108702842	1.90949	0.00167351
			gapvd1.S	-0.834155	0.000731445	rpusd4.L	0.783673	0.00291184	zbtb11.S	1.3586	7.77e-10	pde4d	1.90946	0.005789
			dennd4a.L	-0.834159	0.0177766	fam185a.L	0.783107	0.00324189	mtg2.L	1.35818	0.0017381	mief1.L	1.90937	1.38e-11
			cttnbp2.L	-0.834762	0.00981135	xab2.L	0.782994	0.0461938	asph	1.35758	0.0471663	c14orf79.S	1.90774	0.00273385
			alg10.S	-0.836437	0.00270383	sgpp1.L	0.782653	0.00494851	tmem171.L	1.35753	0.00108487	ssr2.L	1.90713	1.39e-07
			ccnd2.S	-0.837045	0.012493	stil.L	0.781623	0.0342687	LOC108702824	1.35602	0.0477053	itgb6.L	1.90525	0.00883783
			fgd4.S	-0.839288	0.0358886	znhit2.L	0.781219	0.00608762	atp5a1.L	1.35588	0.000207802	LOC108713255	1.90489	7.84e-07
			slc39a3.L	-0.840463	0.00386469	cxxc1	0.780396	0.0095022	thumpd3.L	1.35398	0.00267955	gmps.L	1.90309	2.5e-16
			ssh2	-0.844331	0.0286479	lrrc47.L	0.780375	0.0184468	gid8.L	1.35228	2.12e-06	Xelaev18007686m	1.90235	0.00599375
			plch1	-0.846922	0.042726	ubb.L	0.77984	0.00384136	ptbp1.S	1.35151	1.61e-07	ugcg.L	1.90116	0.00598075
			napg.L	-0.846962	0.00350461	rps3a.S	0.779653	0.000319651	Xelaev18037028m	1.35031	0.029703	emg1.S	1.89954	1.51e-16
			nek2.S	-0.848117	0.0172103	sra1.L	0.77886	0.00239884	vgll4l.L	1.35027	0.000990933	rnf139.S	1.89657	3.89e-13
			naa25.S	-0.848865	0.0168205	tsku.L	0.778807	0.0131085	nop56.S	1.34949	0.00331749	tpgs1.L	1.89617	6.11e-05
			stox2	-0.849102	0.00836008	chpf.L	0.778075	0.0440842	cyp2r1.L	1.34943	0.000244769	taco1.L	1.89616	0.0357747
			rgs12.L	-0.855384	0.00783636	rundc1.L	0.777501	0.030436	sys1.L	1.34774	0.00101137	eif2ak3.S	1.8946	0.000217966
			exd2.L	-0.85573	0.0248149	sqrdl.S	0.777029	0.0368622	pkn1.L	1.34768	1.87e-08	arhgap23.L	1.89435	8.04e-05
			b3gnt5.L	-0.858113	0.0222278	rps3.L	0.776608	0.000305254	Xelaev18011667m	1.34586	9.98e-07	tpbg.S	1.89431	4.12e-05
			il6st.L	-0.858443	0.00258492	gnl3.L	0.776343	0.00486518	cib1.S	1.34499	0.00154131	nxpe3l.6.L	1.89384	3.21e-09
			elovl1.L	-0.85905	0.00847162	bclaf1.S	0.776294	0.0274206	arhgap27.L	1.34395	0.00263161	edem3.L	1.89346	1.99e-05
			Xelaev18046477m	-0.86169	0.00416709	LOC443712	0.775728	0.0333276	psmb3.L	1.34368	7.25e-06	serpinh1.L	1.89329	8.16e-05
			nfkb2.S	-0.864673	0.0153584	zbtb11.L	0.775143	0.0271485	dennd3.L	1.3434	2.7e-06	gramd2b	1.89073	0.00323267
			ranbp9.S	-0.866531	0.0063508	ccnyl1.L	0.774377	0.0466739	foxo1.L	1.3433	0.0147768	LOC108701786	1.89057	0.00453775
			mid1.S	-0.866746	0.0356114	dmac1	0.773955	0.0290702	f2rl1.L	1.34264	1.68e-06	rasgrf1.S	1.88957	0.0280935
			tarbp1.L	-0.867167	4.3e-05	snrnp70.S	0.772776	0.0183228	cdc26.L	1.34243	0.000101047	ccdc92.L	1.88898	0.0103619
			dock7.S	-0.87226	0.0324338	ccnb3.S	0.772126	0.0248121	kpna4.L	1.34231	1.02e-06	slc25a40.L	1.88804	3.75e-07
			znf800.S	-0.883326	0.0388978	cnot9	0.770999	0.00107682	hap1.S	1.34195	0.00049699	sgpp2.S	1.88391	0.0306323
			tgds.S	-0.886632	0.0347048	anxa4.L	0.770986	0.0123561	ddx54	1.3392	0.00127867	zbtb3.S	1.88327	9.58e-05
			nfx1.S	-0.888906	0.0123083	mpp5.L	0.770857	0.0122927	cse1l.L	1.33893	0.00376196	slc2a2.L	1.88293	4.25e-05
			slc20a1.S	-0.89128	0.0424268	paxbp1.S	0.770215	0.000218289	trpv6.L	1.33693	0.000554863	tnip2.L	1.88134	0.000340625
			emilin2.L	-0.894842	0.0183129	gadd45a.L	0.770041	0.000710902	ankrd35.L	1.33647	4.29e-06	tmem19.L	1.8799	0.000127268
			znf383.S	-0.894882	0.0495761	hexim1.S	0.769936	0.00837234	pgrmc2.L	1.3362	8.93e-06	ehd4.L	1.87906	8.22e-07
			rcor1.L	-0.896022	0.0336264	sf3b5.S	0.769876	0.000710015	ccnb3.L	1.33557	4.91e-11	erbb2.S	1.8787	1.2e-09
			mtf2.S	-0.89661	0.00525654	snrnp70.L	0.769627	0.00210777	cdca3.L	1.33521	4.12e-07	st3gal5.L	1.87786	0.00292559
			tp53bp2.L	-0.897311	0.00797656	dnajb12.L	0.76951	0.00412735	snx31.L	1.33508	0.000516734	hspa8.L	1.87627	6.51e-12
			plxna3.S	-0.899251	0.00019084	atad3a.S	0.769247	0.0271055	hes3.1.L	1.33498	0.0145905	arfgef2-like.L	1.87622	3.15e-13
			gpi.S	-0.901355	0.0222278	frmd4a.L	0.768897	0.0446086	dlec1.L	1.33322	0.0357909	lin28b.L	1.87582	2.39e-09
			LOC108713105	-0.901901	0.00134411	rpl37.S	0.767185	0.00813009	cenpi.L	1.33096	1.97e-12	pias2.S	1.87567	0.00848732
			slc25a30.L	-0.904774	0.00224407	srsf10.L	0.766685	0.019505	ctf1	1.33046	1.59e-08	klf15.2.S	1.87476	0.0002102
			sgsm3.L	-0.912469	0.00249665	ccnt2.S	0.764601	0.020199	mrpl20.L	1.33039	5.86e-05	strap	1.87313	2.16e-15
			abca3.S	-0.914013	0.0482436	dido1.L	0.764179	0.0470462	LOC108700229	1.33022	0.00169132	sept8.S	1.87207	7.99e-08
			tnfsf11.S	-0.915604	0.024926	hsp90ab1.S	0.763224	0.00764314	LOC108706865	1.32983	0.012978	syngr2	1.87119	3.44e-06
			degs2.L	-0.917753	0.0125733	ikzf4.S	0.762995	0.032873	psma1.S	1.3295	2.38e-05	rps6ka3.S	1.8695	5.19e-06
			cisd2.L	-0.91919	0.00895902	tspyl2.L	0.761409	0.0313151	loc733539.L	1.32892	0.00153243	lzts2.S	1.86946	4.1e-06
			asphd2.S	-0.920861	0.03938	luc7l3.S	0.761136	0.0196936	fam122b.L	1.32854	3.55e-05	prdx4.L	1.86589	7.47e-05
			c12orf66.S	-0.923419	0.0244536	herpud1.L	0.760997	0.0391837	larp1.L	1.32789	1.68e-07	parn.L	1.8653	1.76e-05
			adpgk.L	-0.923613	0.000834412	sdf4.S	0.759714	0.0129851	rnf103.S	1.32706	7.55e-07	erbb2.L	1.86499	0.000115767
			erbb2.L	-0.923822	0.0476385	skp2.L	0.758443	0.00768232	LOC108712538	1.32695	3.83e-09	plekhg3	1.86378	0.0209031
			uprt.L	-0.923856	0.000332935	fbxw7.L	0.757942	0.0216301	tll1-like.1.L	1.32626	0.000266566	tjp3.L	1.86103	1.85e-19
			ppp3cc.L	-0.925327	0.00279042	fam64a.L	0.756336	0.0414271	atmin.L	1.32593	1.46e-05	mesp2.S	1.86097	0.0490334
			akap1	-0.92555	0.0254671	kbtbd2.L	0.756293	0.00981592	cox5b.1.S	1.32572	0.0260728	clip1.L	1.85897	2.97e-07
			zbtb24.L	-0.929924	0.0111665	ddx3x.L	0.755779	0.00408388	sirt1.L	1.32554	0.000309478	chrna2.L	1.85767	0.00103992
			celsr3	-0.930644	0.0138317	stx16.L	0.753369	0.0265257	znf282	1.32512	2.02e-09	psma1.S	1.85555	1.42e-07
			tmem198.L	-0.932051	0.00088472	cdh3.S	0.750923	0.0411909	tbp.S	1.32511	4.34e-05	timm13.L	1.85488	1.26e-11
			mllt6.S	-0.934416	0.0305755	gse1.S	0.750921	0.0310235	dctpp1.L	1.32472	0.000794315	mak16.L	1.85393	8.79e-19
			sytl4.L	-0.935556	0.00498171	mrpl9.L	0.750124	0.0258535	slc39a7.L	1.32452	4.74e-08	abcg2.L	1.85376	0.000347542
[truncated: 7,639 more rows]

## Sheet: Epi-Meso
List of all genes differnetially expressed between epidermal and mesoderm lineages and their Log2 Fold Change and pvalue corresponding with supplemental figure 7A
[truncated: 2,512 more rows]
