# Supplementary material for: Quantitative analysis of transcriptome dynamics provides novel insights into developmental state transitions
Source: BMC Genomics. 2022 Oct 23;23:723. doi: 10.1186/s12864-022-08953-3 (PMC9588240; doi:10.1186/s12864-022-08953-3)
Supplement: Supplementary file 18 — Additional file 18. Supplemental Table 9. List of all genes from the venn diagrams of genes temporally differentially expressed in endoderm and mesoderm lineages corresponding with Fig. 5B. [file 12864_2022_8953_MOESM18_ESM.xlsx]

## Sheet: St9-10
List of all genes from the venn diagrams of genes temporally differentially expressed in endoderm and mesoderm lineages corresponding with figure 5B
Total				Increase				Decrease
Endo Only	Meso Only	Overlap		Endo Only	Meso Only	Overlap		Endo Only	Meso Only	Overlap
hes5.2.L	gfi1.S	cpeb1.S		nap1l1.S	cog5.L	hnrnpab.L		hes5.2.L	gfi1.S	cpeb1.S
hes5.1.L	ccna1.S	esr10.S		MGC53795	golph3.L	ddx39		hes5.1.L	ccna1.S	esr10.S
hes9.1.S	nt5dc3.S	btg3.S		odc1.S	hnrnph3.L	h3-3b		hes9.1.S	nt5dc3.S	btg3.S
foxd4l1.1.L	tfpi2.L	tfrc.L		slc25a5.L	npm1.L	prmt1.L		foxd4l1.1.L	tfpi2.L	tfrc.L
gsx1.L	pip5k1b.S	cpeb1.L		blzf1.S	eif4a3.S	prmt1.S		gsx1.L	pip5k1b.S	cpeb1.L
neurog3.L	galns.L	tfrc.S		rbm14.S	fscn1.L	hmgb3.S		neurog3.L	galns.L	tfrc.S
foxd3.S	nol4l.L	esr-5.L		ncbp3.L	slc16a3.L	u2af2.S		foxd3.S	nol4l.L	esr-5.L
hes9-1.S	bcl6.L	btg5.1.L		znf326.S	hnrnpk.S	sra1.L		hes9-1.S	bcl6.L	btg5.1.L
lpar6.S	reep1.L	hes5.5.L		ddx5.L	myef2.L	bsg.L		lpar6.S	reep1.L	hes5.5.L
dkk1.L	fbxl21p.L	hes5_X2.L		h3f3b.S	dgat1.L	spint2.L		dkk1.L	fbxl21p.L	hes5_X2.L
hes5.7.S	sun1.L	ccnb5.L		ncl.S	cwc25.L	hmgn2.L		hes5.7.S	sun1.L	ccnb5.L
zbtb43.L	march2.S	msmo1.L		oaz1.S	tsc22d1.L	srsf1.L		zbtb43.L	march2.S	msmo1.L
hes3.L	LOC108705790	Xelaev18029627m		srsf9.L	rabgap1l.S	hspa8.L		hes3.L	LOC108705790	Xelaev18029627m
sbk1.L	zfp36	map4.S		sec23b.S	LOC108702842	h3f3b.L		sbk1.L	zfp36	map4.S
lfng.L	tnfrsf10b.L	plbd2.L		carnmt1	tgif2.S	midn.L		lfng.L	tnfrsf10b.L	plbd2.L
c14orf159.L	anapc10.S	usp33.L		c20orf24.L	ppia.L	khdrbs1.S		LOC108699863	anapc10.S	usp33.L
dusp1.S	kctd3.L	fbxo43.S		snrnp70.L	elovl7.L	cirbp.S		c14orf159.L	kctd3.L	fbxo43.S
foxd4l1.1.S	nov.L	fbxo43.L		hnrnpul2.L	tdgf1.3.L	MGC52578		dusp1.S	nov.L	fbxo43.L
nt5dc3.L	LOC108714659	pced1a.L		eif2s2.L	h1fx.S	mcl1.S		foxd4l1.1.S	LOC108714659	pced1a.L
cep290.L	pias2.S	LOC108708333		ilf2.L	MGC83421	anp32c.S		nt5dc3.L	pias2.S	LOC108708333
klf2.L	sh2b3.S	dnajc9.L		cd63.L	hras.L	upk1b		cep290.L	sh2b3.S	dnajc9.L
admp.L	socs2.S	crtc2.S		tra2b.L	ND2	hmg-17		klf2.L	socs2.S	crtc2.S
adamts1.L	slc4a1.L	jade2.L		txnl4a.S	eif5a.L	hmgn1.L		admp.L	slc4a1.L	jade2.L
cbx4.L	mttp	lrrc40.L		nucks1.S	luc7l2.S	hnrnpu.S		adamts1.L	mttp	lrrc40.L
neurog2.L	myo1e	atf6b.S		bsg.S	upk3a.L	prpf39.1.S		cbx4.L	myo1e	atf6b.S
nhsl1	znf280d.S	gpr12		serf2	loc100494818.L	srsf7.S		neurog2.L	znf280d.S	gpr12
casd1.S	bmp2.L	rbm26.L		ctbp2.S	nfe2l1.S	ralb		nhsl1	bmp2.L	rbm26.L
Xelaev18013247m	rhobtb1.L	ccdc69.S		snu13.S	plekhn1.S	hmgb2.S		casd1.S	rhobtb1.L	ccdc69.S
LOC108705579	clns1a	stil.L		anp32e.L	ubb.L	nsep1		Xelaev18013247m	clns1a	stil.L
uhrf2.L	LOC108714466	lrmp.L		sarnp.S	LOC108718446	hmgb3.L		LOC108705579	LOC108714466	lrmp.L
ggt5.L	enpp2	dnd1.L		epcam.S	hnrnpdl.L	hnrnpa1.S		foxd4l1.2.L	enpp2	dnd1.L
gigyf1.S	mknk1.S	ubn1.L		prcp.S	rpl26.L	rbmx.L		uhrf2.L	mknk1.S	ubn1.L
ahr.S	fam53c.L	LOC108699863		sec61a1.L	midn.S	hnrnpa2b1.L		ggt5.L	fam53c.L	abhd18.L
adgrg1.S	gen1	abhd18.L		glul.S	LOC108719063	srsf3.S		gigyf1.S	gen1	map4.L
cyp26a1.L	mbd6.S	map4.L		tpm3.L	phf13.S	sertad3.L		ahr.S	mbd6.S	ssx2ip.S
mctp2.L	tubz1.L	ssx2ip.S		hnrnpab.S	prpf39.1.L	tpt1.L		adgrg1.S	tubz1.L	pan2.L
ipp.L	nsmf.S	pan2.L		anxa7.L	ubc.L	ccne2.S		cyp26a1.L	nsmf.S	tmem106b.S
Xelaev18036438m	gosr1.S	tmem106b.S		crkl.L	dido1.L	hnrnpa1		mctp2.L	gosr1.S	btg4.L
mob2.2.S	fchsd2	btg4.L		cdh3.L	mcm6.2.S	cirbp.L		ipp.L	fchsd2	hes2.L
pim1.S	brf2.S	hes2.L		srsf3	mlec.S	hnrnpk.L		Xelaev18036438m	brf2.S	hn1.L
thap11.L	atg4a.S	hn1.L		hnrnpc.L	LOC108704302	rbmx.S		mob2.2.S	atg4a.S	cdca7
cdc42ep3.S	n4bp3.S	cdca7		snrpb2.L	mat2a.S	zc3h10.L		pim1.S	n4bp3.S	intu.S
cyr61.S	otud3.L	intu.S		xnf7.L	emc4.L	cdknx.L		thap11.L	otud3.L	Xelaev18016928m
bnc1.L	zbtb39.L	Xelaev18016928m		snrpb.L	irs4.S	rnf222.S		cdc42ep3.S	zbtb39.L	smtn.S
rnf24.L	slc7a6os.L	smtn.S		alyref.L	tpd52l2.S	hmgn1.S		cyr61.S	slc7a6os.L	lix1.L
fzd1	ddit4.S	lix1.L		tmed5.S	hspa8.S	znf91		bnc1.L	ddit4.S	loc100497443.L
dnajb9.S	gtf2a1l.L	loc100497443.L		hist2h3d.L	ptma.L	ccne2.L		rnf24.L	gtf2a1l.L	soga1.L
adgrg1.L	kcnh5.S	soga1.L		cgn.L	LOC100191026	socs3.L		fzd1	kcnh5.S	rcbtb1.L
LOC100036994	espl1.L	rcbtb1.L		pcbp3.L	btbd6.L	pvrl2.L		dnajb9.S	espl1.L	ndrg4.S
ctsc.L	tcf20.L	ndrg4.S		dnajc7.S	h3c7	tmem79.S		adgrg1.L	tcf20.L	snapin
wnk1.L	fgfr1.L	snapin		cldn7.L	hist1h2bj.L	tra2a.S		LOC100036994	fgfr1.L	LOC108708627
park7.L	alg6	LOC108708627		hnrnpu	rhob.S	slc25a17.L		ctsc.L	alg6	rasd1.S
adamts1.S	arhgap31.L	rasd1.S		set.S	fgfr4.S	zbtb10.S		wnk1.L	arhgap31.L	lrrcc1.L
hes7.1.L	prickle2.L	lrrcc1.L		myl12b.S	h2afx.L	rabgap1l.L		park7.L	prickle2.L	znrf1.L
tpgs1.S	kdm7a.S	znrf1.L		cldn6.2.L	mcl1.L	tra2a.L		adamts1.S	kdm7a.S	gtf3c2.L
pcnt.L	tubgcp4.L	gtf3c2.L		plrg1.S	prdm9.L	1700037h04rik		hes7.1.L	tubgcp4.L	retreg3
hivep1.S	eme1.L	retreg3		gtpbp4.L	gfpt1.S	isg20l2.L		tpgs1.S	eme1.L	crtc2.L
fbxo32	klhl12.S	crtc2.L		ywhab.L	map3k1.S	metrnl.S		pcnt.L	klhl12.S	klhl13.S
ccdc71.S	Xelaev18032680m	klhl13.S		cox5b.1.L	sat1.S	LOC108701852		hivep1.S	Xelaev18032680m	elk4.L
prpsap2.L	LOC108707252	elk4.L		srsf6.S	LOC108703765	eef1a1.L		fbxo32	LOC108707252	ikzf2.L
evc2.L	lpar1.S	ikzf2.L		ctf1	LOC108704304	rbms2.S		ccdc71.S	lpar1.S	rfwd3.S
arhgap29.L	mob3c.S	rfwd3.S		hnrnpdl.S	d17h6s53e	zc3h10.S		prpsap2.L	mob3c.S	wdr20.S
dusp1.L	ckap2l	wdr20.S		pcf11.S	LOC108719507	rnd1.S		evc2.L	ckap2l	prr14l
ing1.L	chmp7.L	prr14l		LOC108701478	utp15.S	prickle1.L		arhgap29.L	chmp7.L	LOC108703747
lsm1.S	cdc42ep4.S	LOC108703747		gnl3.L	prom1.L	muc5b		dusp1.L	cdc42ep4.S	fhdc1
timp3.L	znf70	fhdc1		snu13.L	h2ac11	celsr1		ing1.L	znf70	btg4.S
znf81.L	bcl2l14.S	btg4.S		prcc.L	srsf10.L	coq10b.L		lsm1.S	bcl2l14.S	cyr61.L
snx21.L	fgd3.S	cyr61.L		hdlbp.L	rab11fip4l.L	ventx2.1.S		timp3.L	fgd3.S	wdfy2.S
fam13b.L	c7orf26.L	wdfy2.S		ubtf.L	tuba4b.S	fhdc1.L		znf81.L	c7orf26.L	arhgap20.S
insm1.L	znf229.S	arhgap20.S		h2afz.S	hexim1.L	chst7.S		snx21.L	znf229.S	slc39a9-like.1.S
tmem117.S	rims2	slc39a9-like.1.S		myef2.S	fut1.S	sfpq.L		fam13b.L	rims2	snph.L
snrk.L	ncoa6.L	foxd4l1.2.L		ybx1.S	fbxo5.L	rhebl1.S		insm1.L	ncoa6.L	arf3.S
cables1.S	palb2.L	snph.L		mex3b.L	post7p.L	hdgf.L		tmem117.S	palb2.L	pdzd2.L
fgfr4.L	ube2s.L	arf3.S		krt18.L	epha2.L	atg16l1.S		snrk.L	ube2s.L	kiaa0141.S
jade1.S	slc25a44	pdzd2.L		arf4.S	ccno.S	arl13b.L		cables1.S	slc25a44	nr3c2.L
tspoap1.S	pigu	kiaa0141.S		sec61g.L	hexim1.S	spry1.S		fgfr4.L	pigu	klf15.2.L
kiaa2026.S	senp1.L	nr3c2.L		luc7l3.L	LOC108719643	slc2a1.S		jade1.S	senp1.L	mxd3.L
serinc2.L	atf7ip.S	klf15.2.L		nedd8.S	znf750.L	rasl11b.L		tspoap1.S	atf7ip.S	lfng.S
xarp-like.S	irf6.2.L	mxd3.L		magoh.L	cyp26a1.S	bmp7.2.L		kiaa2026.S	irf6.2.L	ssx2ip.L
ice1	tigd4	lfng.S		epcam.L	LOC108695577	srsf2.L		serinc2.L	tigd4	fbxw2.S
mlh1.S	ikzf5.L	ssx2ip.L		h2afz.L	znf750.S	tfap2a.L		xarp-like.S	ikzf5.L	snrk.S
akap11.S	rapgef2.L	fbxw2.S		rtn4.L	asna1.L	rarg.S		ice1	rapgef2.L	enc1.2.S
pkd1.L	rgs12.L	snrk.S		u2af1.S	mcm6.2.L	eef1a1o.S		mlh1.S	rgs12.L	kmt2a
mpi.S	zdhhc7.S	enc1.2.S		plpp2.L	snta1.S	slc7a3.L		akap11.S	zdhhc7.S	ccdc69.L
LOC108718309	irs2	kmt2a		ets2.S	dhrs3.S	cldn4.L		pkd1.L	irs2	arhgap20.L
atf7ip2	rgs12.S	ccdc69.L		fus.L	LOC100301958	kiaa0232.S		mpi.S	rgs12.S	plxnb3
klf6.S	ift80.L	arhgap20.L		srsf1.S	LOC108718087	sapcd2		LOC108718309	ift80.L	zar1l.S
gramd3.L	c5orf30.S	plxnb3		loc728026.L	ier5l.L	cdk9.L		atf7ip2	c5orf30.S	bbs9.L
dscr3.L	vamp7.L	zar1l.S		frmd4b.L	sbk1l.S	Xelaev18032628m		klf6.S	vamp7.L	rspry1.S
kif7.L	znf436	bbs9.L		iscu.S	xarp.L	atf4.L		gramd3.L	znf436	ppp1r3b.S
sun1.S	ephb3.S	rspry1.S		ephb3.L	psmg1.L	xbp1.L		dscr3.L	ephb3.S	anapc10.L
acox2.L	ahsa1.L	ppp1r3b.S		galnt7.S	bambi.L	LOC108715172		znf750.S	ahsa1.L	adcy6.L
arhgap29.S	lmo4.1.S	anapc10.L		ptbp1.S	LOC108695519	acy3.L		kif7.L	lmo4.1.S	kdm8.L
tshz1.S	fbxo46.S	adcy6.L		hs3st1.L	LOC108715080	btg1.L		sun1.S	fbxo46.S	mylip.S
vegfa.S	tnfaip8.S	kdm8.L		ssbp3.L	gas1.L	sf3b5.S		acox2.L	tnfaip8.S	cat.2.L
mbd2.S	bicc1.L	mylip.S		fam32a.L	ago2	pou5f3.2.S		arhgap29.S	bicc1.L	spsb1.L
pim1.L	prex1.S	cat.2.L		itgb1.S	nrarp.S	ptafr.L		tshz1.S	prex1.S	nfe2l2.S
fdft1.S	exd1.L	spsb1.L		tceb2.L	prss8	g2e3.L		vegfa.S	exd1.L	plch2
zdhhc23.L	ism1.L	nfe2l2.S		marcksl1.L	post.L	arl5c.L		mbd2.S	ism1.L	oat.1.S
rnf24.S	enpp4.L	plch2		srrt.L	usp21.S	brd2.S		pim1.L	enpp4.L	fbxo30.L
mccc2	Xelaev18041850m	oat.1.S		lrwd1.L	egr4.L	sowahc.L		fdft1.S	Xelaev18041850m	bahcc1.S
dynll2	trim39.L	fbxo30.L		srsf2.S	ins	dlx5.S		zdhhc23.L	trim39.L	uspl1.S
pcdh20.S	usp12.S	bahcc1.S		vezf1.S	LOC108717955	sox2.L		rnf24.S	usp12.S	znf148.S
sod2.S	znf518a.S	uspl1.S		hnrnpl.L	znf101	hnrnpr.L		mccc2	znf518a.S	tada2b.S
znf526.S	zwilch.S	znf148.S		hnrnpa0.S	znf703.S	LOC108698217		klf2.S	zwilch.S	slc25a37.S
pdp1.L	lrrfip2	tada2b.S		sfpq.S	hist2h2ab.L	sgk1.S		dynll2	lrrfip2	vldlr.S
fndc3a.L	gemin5	slc25a37.S		mex3c.L	bmp4.S	LOC108711622		pcdh20.S	gemin5	tubg1.L
oxr1	akap13.S	vldlr.S		hnrnpa0.L	pcdh19	plekhg3.L		sod2.S	akap13.S	ccdc191.L
fzd1.L	map3k9.L	tubg1.L		ubald2-b	rhebl1.L	gfpt1.L		znf526.S	map3k9.L	cep57.S
loc733728.L	morc2.S	ccdc191.L		calr.L	Xelaev18000460m	slc35a2.S		pdp1.L	morc2.S	ccng1.S
bcl2l12.S	tcf20.S	cep57.S		capzb.L	klf2.S	LOC108709818		fndc3a.L	tcf20.S	pnpla8.L
sdc1.L	xrcc2.L	ccng1.S		MGC81970	socs4.L	e2f7.S		oxr1	xrcc2.L	lig4.L
acox3.L	LOC108711754	pnpla8.L		fbxo34.L	LOC108708226	LOC108701212		fzd1.L	LOC108711754	fam63b.L
stc1.S	lipe.S	lig4.L		ptbp1.L	LOC101734999.S	ventx2.2.L		loc733728.L	lipe.S	akip1
fam21a.L	snx7.L	fam63b.L		b3gnt2.S	tp53inp1.L	fam122b.L		znf750.L	snx7.L	dtl.L
sod2	hsd17b7.S	akip1		commd3.S	LOC108716539	slc25a29.L		bcl2l12.S	hsd17b7.S	arhgap33.S
insrr.S	limch1.L	dtl.L		chrac1.S	LOC108698739	Xelaev18022211m		sdc1.L	limch1.L	ctsc.S
cyld.S	top3a.L	arhgap33.S		rab40c.L	LOC108711832	rbl1.L		acox3.L	top3a.L	Xetrov90003513m.L
cr1b	tmem164.L	ctsc.S		marcksl1.S	nfkbia.L	fsbp-like.L		stc1.S	tmem164.L	b3gnt5.S
LOC108712891	oaf.S	Xetrov90003513m.L		dnph1	rbm5.S	LOC108719510		fam21a.L	oaf.S	txnip.S
rbm24.L	MGC86530	b3gnt5.S		pofut2	pcdha13.S	e2f7.L		sod2	MGC86530	nsl1.L
ccdc71l.S	znf526.L	txnip.S		LOC108703769	LOC108719529	skil.S		insrr.S	znf526.L	kmt2a.S
lbh.L	cry2.S	nsl1.L		elob	LOC108716538	znf585b.S		cyld.S	cry2.S	apex2.L
usp15.L	tdgf1.1.L	kmt2a.S		cdc14b.L	LOC108707159	wap		cr1b	tdgf1.1.L	septin9.L
tlcd2.L	birc2.L	apex2.L		imp4.S	LOC108716428	pou5f3.2.L		LOC108712891	birc2.L	garem1.L
fancm.L	dnajb14.S	septin9.L		ccnf.L	gadd45g.S	fam193a.L		rbm24.L	dnajb14.S	rsbn1l.L
phlpp2.L	ift81.S	garem1.L		lpar4.L	post10.L	ets2.L		ccdc71l.S	ift81.S	hdac2.L
Xelaev18009275m	gad1.2.S	rsbn1l.L		nuak2.S	Xelaev18028552m	LOC108719569		lbh.L	gad1.2.S	MGC68639
btbd9.L	stambp.L	hdac2.L		rbm14.L	Xelaev18047576m	spry1.L		usp15.L	stambp.L	hs6st1.L
gramd2b	cyld	MGC68639		tmcc1.L	hist1h3g.L	rbl1.S		tlcd2.L	cyld	usp33.S
arhgap11a.2.S	c16orf46	hs6st1.L		tuba4b.L	Xelaev18006086m	trim25		fancm.L	c16orf46	eif2ak3.S
myd88.S	gpi.S	usp33.S		cxcr4.S	pced1a.S	irf8.S		phlpp2.L	gpi.S	trps1.L
mapk1.L	tgs1.S	eif2ak3.S		csrnp1.L	cldn4.S	tubb2b.L		Xelaev18009275m	tgs1.S	dnmt1.L
pim3.S	tsen34.L	trps1.L		prickle1.S	fos.S	stox1.S		btbd9.L	tsen34.L	bcl6.S
ring1.S	trpv4.L	dnmt1.L		best2.L	dhrs3.L	chd3		gramd2b	trpv4.L	wdr60.S
malt1	c21orf91.S	bcl6.S		znf653.L	fam46a.L	txnip.L		arhgap11a.2.S	c21orf91.S	aco2.L
pbx3	cpeb2-like.S	wdr60.S		LOC108705724	xvent-2b	LOC108719518		myd88.S	cpeb2-like.S	lats2.S
trerf1.S	siva1.L	aco2.L		plk3.S	napb	socs3-like.1.L		mapk1.L	siva1.L	rnf149.S
ccnl2.S	lysmd4.L	lats2.S		cidea.L	esco2	alcam.L		pim3.S	lysmd4.L	r3hdm4.L
nr3c2.S	cep76.L	rnf149.S		ptmap12.S	rhob.L	muc2		ring1.S	cep76.L	loc100158305.L
setd1b.L	znf639.S	r3hdm4.L		ier5.L	eef1b2	socs3		malt1	znf639.S	zfpm1
c1orf116.L	slc30a7.L	loc100158305.L		rhpn2.L	tlr2	LOC108698564		pbx3	slc30a7.L	map3k2.S
kmt2e.L	cfap97.L	zfpm1		klf10.S	nrarp	hist2h2ab.S		trerf1.S	cfap97.L	gramd2b.S
MGC81163	LOC108716797	map3k2.S		stox1.L	LOC108719479	foxh1.2.L		ccnl2.S	LOC108716797	zbtb43.S
kit.S	MGC154819	gramd2b.S		acvr1b.L	rassf6.S	prdm15.S		nr3c2.S	MGC154819	soga1.S
slc38a3.S	mal2.L	zbtb43.S		lpar6.L	LOC108699863	sp5l.L		setd1b.L	mal2.L	LOC100489554.L
rasa3.L	uhrf1bp1l.L	soga1.S		ier5l.S	rnf144b.S	tead4.S		c1orf116.L	uhrf1bp1l.L	znf367.S
topbp1.L	kcmf1.L	LOC100489554.L		awat1.L	msto1.L	tfcp2l1.L		kmt2e.L	kcmf1.L	akap11.L
hdac9.L	dcun1d3.S	znf367.S		ier2.L	fos.L	junb.L		MGC81163	dcun1d3.S	kiaa1715.L
pttg1ip.2.L	pwwp2b.S	akap11.L		trim7.S	slc35d2	rdh10.L		kit.S	pwwp2b.S	map7d2
klhl17.L	bicd1.L	kiaa1715.L		loc100495271.S	chst2.L	ficd.S		slc38a3.S	bicd1.L	wdr20.L
slc25a43.L	zfc3h1	map7d2		spry2.S	stat3.2.L	fam110c.L		rasa3.L	zfc3h1	Xelaev18028849m
cdkn1b	epc2.S	wdr20.L		rbm12.L	LOC108705484	pvrl1-like.2.L		topbp1.L	epc2.S	zfp36l2.1.S
ccs.L	atxn1.S	Xelaev18028849m		Xelaev18024228m	LOC108695579	xbp1.S		hdac9.L	atxn1.S	kiaa2026.L
lrp5.L	fntb.S	zfp36l2.1.S		Xetrov90004873m.L	tll1-like.1.L	cldn5.S		pttg1ip.2.L	fntb.S	golga5.L
stx11.L	pnisr.L	kiaa2026.L		fzd6.S	rbm47.L	rbms2.L		klhl17.L	pnisr.L	mapk1.S
snx10.L	serinc3.L	golga5.L		ctc1	pgbd5.L	sgk1.L		slc25a43.L	serinc3.L	spsb1.S
nbeal2.S	suv39h1.L	mapk1.S		gadd45g.L	mypop.S	crebzf.S		cdkn1b	suv39h1.L	fam126a.S
rasa2.L	ercc4.L	spsb1.S		farp2.S	LOC108700879	LOC108707041		ccs.L	ercc4.L	rdh13.L
jund.S	chp1.L	fam126a.S		tsc1.S	tfap2c.L	admp2.L		lrp5.L	chp1.L	ikzf4.S
fut11.S	rfxap.S	rdh13.L		arntl2.S	LOC108699910	gprc5c.L		stx11.L	rfxap.S	klf15.2.S
smap2.S	agap1	ikzf4.S		grpel2.L	LOC108697295	npdc1.1.S		snx10.L	agap1	tmem52.S
crls1.S	pphln1.L	klf15.2.S		mex3b.S	frem2	srsf7.L		nbeal2.S	pphln1.L	poc1a.L
tmem259.L	ssbp2.S	tmem52.S		dusp5.L	zfp36l2.L	Xelaev18030357m		rasa2.L	ssbp2.S	mtus1.L
pgam1.S	wac.S	poc1a.L		etaa1.S	Xelaev18041975m	gnb3.L		jund.S	wac.S	cbx4.S
atf7ip.L	zic2.L	mtus1.L		plxna4	hes3.1.L	litaf.L		fut11.S	zic2.L	ppp1r3b.L
them6.L	fam221a.L	cbx4.S		ubald2.L	fosl2.S	fgfr2.L		smap2.S	fam221a.L	sik2.L
btbd10.S	cry1.L	ppp1r3b.L		aagab.L	Xelaev18038135m	notch1.L		crls1.S	cry1.L	simc1.L
syde2.L	tmem169.L	sik2.L		gpaa1.L	post5.S	ccdc181.S		tmem259.L	tmem169.L	dok1.L
map3k2.L	acvr1.S	simc1.L		gadd45a.L	fhit.L	ttbk1.S		pgam1.S	acvr1.S	ankrd37.S
amot.L	LOC108704248	dok1.L		c1orf198	LOC108716547	LOC108706589		atf7ip.L	LOC108704248	c10orf2.L
sfrp2.L	loc100158433.L	ankrd37.S		Xelaev18003796m	evpl.L	zswim4.L		them6.L	loc100158433.L	LOC108718425
zbed1	ccdc61.L	c10orf2.L		LOC108718254	vav2.L	LOC108702579		btbd10.S	ccdc61.L	wdr6.L
znf282.S	dbf4b.L	LOC108718425		lratd1	rgcc.L	pgbd4		syde2.L	dbf4b.L	loc100491633.L
ythdc2.L	mcm3ap.L	wdr6.L		not.L	sall3.L	LOC108719494		map3k2.L	mcm3ap.L	lgr4.L
rasd1.L	pard6g.L	loc100491633.L		rap2b.L	LOC108696255	LOC108696874		amot.L	pard6g.L	haus4.L
kansl1	zdhhc20.S	lgr4.L		ggt1.L	chst9	Xelaev18008577m		sfrp2.L	zdhhc20.S	rpap1.S
sptssb	c3orf17.L	haus4.L		Xetrov90024734m.S	LOC108715137	LOC108709393		zbed1	c3orf17.L	zfp36l2.2.L
coq2.L	oxsm.S	rpap1.S		muc22	sfrp2.S	LOC108701134		znf282.S	oxsm.S	casd1.L
slf1.L	gls.L	zfp36l2.2.L		angpt4.S	gprc5c.S	junb.S		ythdc2.L	gls.L	dnajb9.L
prodh.L	taf5l.L	casd1.L		tmcc1.S	cluh	arl4c.L		rasd1.L	taf5l.L	loc100145576.L
mars2.L	mterf1.L	dnajb9.L		shox2.S	loxl1.L	akap12.L		kansl1	mterf1.L	uspl1-like.L
josd1.S	rbm38.L	loc100145576.L		LOC108716071	fth1.L	pdgfb.L		sptssb	rbm38.L	vldlr.L
acap3.S	golgb1.S	uspl1-like.L		Xelaev18001472m	fmc1.L	hsp70.L		coq2.L	golgb1.S	e2f1.S
ammecr1l.L	Xelaev18031390m	vldlr.L		grem1.L	LOC108711412	LOC108698137		slf1.L	Xelaev18031390m	tmem19.L
tlcd2.S	sdf4.L	e2f1.S		phospho1.S	mapre2.S	LOC108715416		prodh.L	sdf4.L	arhgap11a.2.L
hivep2.L	clic1.S	tmem19.L		plcl2	lypd6.L	jag1.L		mars2.L	clic1.S	rfx5.S
atmin.L	rap2c.S	arhgap11a.2.L		stx8.L	atf3.L	akap2.L		josd1.S	rap2c.S	prmt5.L
tesk2.S	rnf19a.S	rfx5.S		aim1.S	plk2.L	LOC100036828		acap3.S	rnf19a.S	ccna1.L
fam8a1.L	dhx38.L	prmt5.L		robo3.S	slc35f6	LOC108698488		ammecr1l.L	dhx38.L	mcm10.L
metrnl.L	tdh.S	ccna1.L		foxi4.2.S	LOC108698216	slc7a5.S		tlcd2.S	tdh.S	zfand4.S
rnf185.S	taf5l.S	mcm10.L		akap12.S	azin2.S	nfkbiz		hivep2.L	taf5l.S	tmem171.L
zfpm1.S	usp22 a	zfand4.S		Xelaev18038858m	ras-dva1.L	rassf7.L		atmin.L	usp22 a	dnmt1.S
mtus1	fermt2.S	tmem171.L		dsel.S	LOC108698396	LOC108706318		tesk2.S	fermt2.S	rab5d.L
nf1.L	cog5.L	dnmt1.S		loc108648340.L	cldn23	mplkip		fam8a1.L		wdr77.S
slc25a40.L	golph3.L	rab5d.L		LOC494849	Xelaev18001309m	stx19.S		metrnl.L		ncor2
bcor.S	hnrnph3.L	wdr77.S		prkx.L	kit.L	LOC108698884		rnf185.S		leprot.S
fosb.S	npm1.L	znf750.S		msx1.L	klf17.L	LOC108714507		zfpm1.S		rab11fip1.S
rabgef1	eif4a3.S	ncor2		LOC108718648	ackr3.S	Xelaev18039183m		mtus1		lrriq1.L
gtpbp6.S	fscn1.L	leprot.S		MGC76328.S	pnhd.L	Xelaev18000483m		nf1.L		znf318.S
sdhd.L	slc16a3.L	rab11fip1.S		t2.S	LOC108717645	rbm47.S		slc25a40.L		LOC108706498
trps1.S	hnrnpk.S	lrriq1.L		Xelaev18012750m	ablim1	LOC108715921		bcor.S		rasef
txnl4b.S	myef2.L	znf318.S		parp2.L	lhx5.S	rnf135.L		fosb.S		nhlrc3.S
oraov1.S	dgat1.L	LOC108706498		kif5c.S	znf581.S	cfap52.L		rabgef1		sept9.S
fgfr3.L	cwc25.L	rasef		c2cd2.S	slc2a2.L	LOC100489887.L		gtpbp6.S		pcmtd2.S
parp15	tsc22d1.L	nhlrc3.S		pmm2.L	LOC108719789	ventx2.1.L		sdhd.L		eif5a.S
plk1.L	rabgap1l.S	sept9.S		hes7.2.L	chkb.S	xicl		trps1.S		phf19.S
entpd6.L	LOC108702842	pcmtd2.S		lrig3.L	id3.L	grhl3.S		txnl4b.S		tm2d2.S
rnf44.S	ppia.L	eif5a.S		golm1.L	LOC108715808	LOC108717642		oraov1.S		hs3st1.S
fcho1.L	elovl7.L	phf19.S		Xelaev18030476m	MGC115235	tmpo		fgfr3.L		ect2.L
ptpn21.L	tdgf1.3.L	tm2d2.S		LOC108704231	Xelaev18005230m	sdc4.L		parp15		lrr1.L
edc3.L	h1fx.S	hs3st1.S		lzts1.S	LOC108703754	tsc22d3.L		plk1.L		oxr1.S
pms2.L	MGC83421	ect2.L		nxpe4.S	abcb1	dusp5.S		entpd6.L		hs3st1
sys1.L	hras.L	lrr1.L		ptpro.L	styk1	dlc1.L		rnf44.S		dnajc16.L
mpp5	ND2	oxr1.S		rap2b.S	epn3.L	grhl3.L		fcho1.L		frmd4a.L
papd4.L	eif5a.L	hs3st1		LOC100495010.S	loc100487022.L	Xelaev18024458m		ptpn21.L		lgr4.S
mfn2.S	luc7l2.S	dnajc16.L		rasl11b.S	xetrov90011961m.L	LOC108696061		edc3.L		map7d3.L
tbk1.S	upk3a.L	frmd4a.L		LOC108701311	hes3.1.S	Xelaev18001443m		pms2.L		med13l.L
stam2.L	loc100494818.L	lgr4.S		fam110c.S	Xelaev18025740m	tmem127.S		sys1.L		cenpl.S
tmem52.L	nfe2l1.S	map7d3.L		kcnq1	LOC108711502	LOC108696887		mpp5		fbxo30.S
ssh1.L	plekhn1.S	med13l.L		fam171a2.L	ras-dva1.S	pcdh7.L		papd4.L		gmnn.L
nr1h2.S	ubb.L	cenpl.S		tmem178b	LOC108719577	pdk4.S		mfn2.S		ikzf2.S
topaz1.L	LOC108718446	klf2.S		LOC108704394	prelid1.L	hpgd.L		tbk1.S		prdm2.L
ranbp2.S	hnrnpdl.L	fbxo30.S		rarg.L	sec14l3.L	Xetrov90029963m.L		stam2.L		Xelaev18041239m
chpf.L	rpl26.L	gmnn.L		sp5l.S	Xelaev18003044m	Xetrov90005150m.S		tmem52.L		tesk1
ints6l	midn.S	ikzf2.S		fam84b.S	klf5.L	hap1.L		ssh1.L		LOC108717639
spen	LOC108719063	prdm2.L		ifnlr1	LOC100191024	has1.S		nr1h2.S		cdc42bpb
mycl.L	phf13.S	Xelaev18041239m		LOC108700571	LOC108697345	hes4.L		topaz1.L		stmn1.S
slc35a1.L	prpf39.1.L	tesk1		dlx2.S	dnajb4.L	LOC108707322		ranbp2.S		znf628.L
oxr1.L	ubc.L	LOC108717639		slc39a8.L	cyfip2	nudt22.L		chpf.L		kank1.L
slc4a1ap.S	dido1.L	cdc42bpb		mgst2.L	hal.1.L	LOC108695501		ints6l		tnfrsf19.S
znf554.L	mcm6.2.S	stmn1.S		st3gal5.S	adap1.L	LOC108705281		spen		ino80d.S
arrdc3.S	mlec.S	znf628.L		tacc2.L	fam189b.L	LOC108702825		mycl.L		atf6b.L
nfat5.S	LOC108704302	kank1.L		tfap2e.S	timp-1.L	LOC108719547		slc35a1.L		smad9.L
vps4b.L	mat2a.S	tnfrsf19.S		cfap58	tmem229a.L	emp2.L		oxr1.L		tbc1d9
mkl2.S	emc4.L	ino80d.S		cxcr4.L	Xelaev18038969m	nedd9.S		slc4a1ap.S		garem1.S
sik1.S	irs4.S	atf6b.L		LOC108710651	dmrt2.L	cldn6.S		znf554.L		cdc7.L
slc18a2.L	tpd52l2.S	znf750.L		ubp1.S	Xelaev18027991m	stx19.L		arrdc3.S		zc3h6
atxn1l.S	hspa8.S	smad9.L		Xelaev18003995m	pax3.S	Xelaev18000217m		nfat5.S		ifih1.L
mau2.S	ptma.L	tbc1d9		steap3.L	LOC108718070	LOC108711538		vps4b.L		ccdc18.L
hdac4.L	LOC100191026	garem1.S		rasgrf1	rsad2.L	Xelaev18037842m		mkl2.S		vps26b.L
sptssb.L	btbd6.L	cdc7.L		spred1.L	rfx4.L	wee2a		sik1.S		emilin2.L
itga5.L	h3c7	zc3h6		zeb2.L	ag1.L	slc16a12.S		slc18a2.L		itga5.S
arf6.L	hist1h2bj.L	ifih1.L		LOC108718647	LOC108715136	zfp36l2.S		atxn1l.S		dock4
mtus1.S	rhob.S	ccdc18.L		Xelaev18041871m	LOC108704293	LOC108702848		mau2.S		fibp.L
MGC85210	fgfr4.S	vps26b.L		Xelaev18029885m	cmtm8.L	Xelaev18023727m		hdac4.L		trak1
rab4b.L	h2afx.L	emilin2.L		ces5a	nlgn3.L	prdm1.L		sptssb.L		bcor.L
mapkbp1.S	mcl1.L	itga5.S		vgll4l.S	LOC108719633	zmcm3.L		itga5.L		fam208a.S
pdzd2.S	prdm9.L	dock4		adam33.L	foxd4l1.2.L	fam43a.S		arf6.L		glt1d1.L
sbno2.S	gfpt1.S	fibp.L		slit1.S	LOC108706886	Xelaev18025314m		mtus1.S		rp2.S
ccng2.L	map3k1.S	trak1		itih3	Xelaev18017777m	LOC108695546		MGC85210		pdgfb.S
stx11.S	sat1.S	bcor.L		LOC108717663	tat.S	hist1h1t		rab4b.L		sirt3.2.L
tmem55a.L	LOC108703765	fam208a.S		spdef.S	msx2.S	sall1.L		mapkbp1.S		trafd1.L
cerk.S	LOC108704304	glt1d1.L		wee1.S	id3.S	smad4.1.L		pdzd2.S		fbxo11.S
LOC108700788	d17h6s53e	rp2.S		hamp	ikbkg.S	zswim5		sbno2.S		zfyve1
pias4.S	LOC108719507	pdgfb.S		relt.L	Xelaev18029313m	LOC105945479		ccng2.L		edem1.S
ralgapa2.S	utp15.S	sirt3.2.L		not.S	tuba1a.S	zswim5.S		stx11.S		cenpe.L
mblac2.L	prom1.L	trafd1.L		btg-x	LOC108704294	fhl3.L		tmem55a.L		gigyf1.L
sipa1l3.S	h2ac11	fbxo11.S		six3.S	sspo	elf1.L		cerk.S		ptprh.S
rsbn1l.S	srsf10.L	zfyve1		spns2.L	Xelaev18016063m	fam109b.L		LOC108700788		camsap1.L
iqgap3.L	rab11fip4l.L	edem1.S		numbl.L	pdk4.L	Xelaev18017221m		pias4.S		mtmr3
helb.L	tuba4b.S	cenpe.L		fat4.L	bmp3.S	atg16l1.L		ralgapa2.S		mecr.S
rnf149.L	hexim1.L	gigyf1.L		ankrd24.L	ackr3.L	LOC108702448		mblac2.L		hells.L
pgam1.L	fut1.S	ptprh.S		LOC108711796	pnhd.S	nedd9.L		sipa1l3.S		slc4a11.S
ndc1.S	fbxo5.L	camsap1.L		rnf152.L	LOC108701168	znf451		rsbn1l.S		zar1l.L
aste1.L	post7p.L	mtmr3		phox2a	tmem158.S	ptgs2.L		iqgap3.L		MGC147172.L
pias1.L	epha2.L	mecr.S		lrriq3.S	trim67.S	ccng1.L		helb.L		disp1.L
brwd1.L	ccno.S	hells.L		LOC108719541	plcd3.L	Xelaev18001896m		rnf149.L		rbm24.S
arhgap18.L	hexim1.S	slc4a11.S		szl	cbln1	gprc5cl1.L		pgam1.L		hdac2.S
tmtc4.L	LOC108719643	zar1l.L		hap1.S	Xelaev18004205m	rhbdl3		ndc1.S		fam83d.L
grhl1.S	cyp26a1.S	MGC147172.L		Xelaev18002683m	ppp1r27	LOC108704627		aste1.L		fam134a.L
rnf185.L	LOC108695577	disp1.L		Xelaev18040913m	c15orf39.S	proser1.S		pias1.L		tacc3.S
hps5.L	asna1.L	rbm24.S		xkr4.L	LOC108702918	eif4a2.L		brwd1.L		pias2.L
kif13a	mcm6.2.L	hdac2.S		pcdh8.L	ar.L	Xelaev18021693m		arhgap18.L		tada3.S
nasp.L	snta1.S	fam83d.L		col4a1.L	LOC108712518	caprin2.S		tmtc4.L		pif1.L
ifrd1.S	dhrs3.S	fam134a.L		Xelaev18041870m	syn1.L	nxpe3l.6.L		grhl1.S		clspn.S
tert.L	LOC100301958	tacc3.S		fgd1.S	hesx1.L	loc108715171.S		rnf185.L		rcbtb1.S
wdr60.L	LOC108718087	pias2.L		ndufb4.L	Xelaev18011395m	ptgs2.S		hps5.L		kiaa1958
ing1.S	ier5l.L	tada3.S		xlmo1	efnb3	pkn1.L		kif13a		dsc3.S
chpf.S	sbk1l.S	pif1.L		cux2.L	cks1b.L	yrdc		nasp.L		fzd6.L
stxbp6.L	psmg1.L	clspn.S		LOC108697833	ptch2.L	entpd2.S		ifrd1.S		psen2.S
btbd6.S	bambi.L	rcbtb1.S		LOC108700036	LOC108711532	aplnr.S		tert.L		kif11.L
kpna2.S	LOC108695519	kiaa1958		twist1.L	LOC108718449	gfod1		wdr60.L		arap1
arid4a.L	LOC108715080	dsc3.S		sema4a.S	ptch2.S	gas2l1.S		ing1.S		pygo1.L
rsbn1.L	gas1.L	fzd6.L		LOC108706492	LOC108708413	fth1.S		chpf.S		pex6.S
rrm2b.S	ago2	psen2.S		lrig3.S	LOC108709387	rab26.L		stxbp6.L		lrrc47.L
rhou	nrarp.S	kif11.L		cacnb2.L	zic3.L	nynrin		btbd6.S		tubgcp3.L
plekhg1.S	prss8	arap1		hhip.L	adap2.L	MGC53707		kpna2.S		cep164.S
ccser2.L	post.L	pygo1.L		prph.S	LOC108700281	crocc.L		arid4a.L		ppargc1b.L
usp34.S	usp21.S	pex6.S		LOC108716562	gpr34	rnd1.L		rsbn1.L		prmt5.S
wrap73.L	egr4.L	lrrc47.L		mafb.S	olig4.S	gpx2.S		rrm2b.S		cep85.S
sik3.S	ins	tubgcp3.L		sp8.S	kcna3.S	tuba1cl.2.S		rhou		fzr1.L
gtf3c4.L	LOC108717955	cep164.S		sox17a.S	LOC108703541	dennd2c.L		plekhg1.S		tnfrsf10b.S
ganab.L	znf101	ppargc1b.L		star.L	LOC108716739	top2b.S		ccser2.L		elmod2.L
cyth2.L	znf703.S	prmt5.S		glis2.S	LOC100192369	apln.L		usp34.S		rab11fip5.L
adh5.L	hist2h2ab.L	cep85.S		arhgef40.S	gas2l1.L	fosl2.L		wrap73.L		tpra1.S
LOC398398	bmp4.S	fzr1.L		rgmb.S	apela.S	cnn1.L		sik3.S		ptpn21.S
gtf3c1.L	pcdh19	tnfrsf10b.S		MGC52759	LOC108701666	upk2.S		gtf3c4.L		ndrg4.L
mycl.S	rhebl1.L	elmod2.L		LOC108712894	LOC108705810	kirrel2.L		ganab.L		ndst2.S
pik3r3.S	Xelaev18000460m	rab11fip5.L		pdgfra.L	LOC100496293.L	efna4.L		fos.S		zfyve28.L
aplp2.L	socs4.L	tpra1.S		Xelaev18006325m	slc34a2.L	Xelaev18003910m		cyth2.L		LOC108719544
wwc1.S	LOC108708226	ptpn21.S		Xelaev18018970m	aldh1l1.L	Xelaev18003021m		adh5.L		prex1.L
irf2bp2.L	LOC101734999.S	ndrg4.L		Xelaev18037313m	tmem163.S	mfap2.S		LOC398398		ndel1.L
exo1.S	tp53inp1.L	ndst2.S		kiaa2012	LOC108696788	bcl3.L		gtf3c1.L		tmem181.L
klhl2	LOC108716539	zfyve28.L		LOC108702458	krt.S	prrt4		mycl.S		zdhhc1.L
LOC108704260	LOC108698739	LOC108719544		dgki	fcn1	cnn1.S		pik3r3.S		katnbl1.L
tmtc2.S	LOC108711832	prex1.L		LOC108701725	rnf225	mxi1.L		aplp2.L		ncor2.S
trib2.S	nfkbia.L	ndel1.L		Xelaev18003215m	slc16a3	nhs.L		wwc1.S		ksr1.L
tpcn2	rbm5.S	tmem181.L		efs.S	cdc25b.S	usp43		irf2bp2.L		ankrd12.L
taf4.S	pcdha13.S	zdhhc1.L		MGC154351	hsp90aa1.1.L	sh3bp4.L		exo1.S		hn1.S
zfhx3.L	LOC108719529	katnbl1.L		Xelaev18024628m	apold1.L	Xelaev18022168m		klhl2		tnrc6a.S
atp10b	LOC108716538	ncor2.S		Xelaev18044351m	LOC108719537	xetrov90011961m.S		LOC108704260		znrf3.L
cep350.S	LOC108707159	ksr1.L		gabarapl1-b	Xelaev18039704m	gs17.L		tmtc2.S		vps26b.S
zbed1.L	LOC108716428	ankrd12.L		plk3.L	Xelaev18036472m	fam83b.S		trib2.S		piezo1.S
ago4.S	gadd45g.S	hn1.S		LOC108697415	sds.S	tiparp.S		tpcn2		adamts6.S
gsap.L	post10.L	tnrc6a.S		lrrtm3.S	LOC108706865	fosl1.L		taf4.S		rpain.S
ppp2r3b.L	Xelaev18028552m	znrf3.L		adra2c.L	Xelaev18029191m	Xelaev18044839m		zfhx3.L		mtmr3.L
otud7b.S	Xelaev18047576m	vps26b.S		dram1	Xelaev18012294m	itpka		atp10b		smtn.L
idh3a.L	hist1h3g.L	piezo1.S		slc30a8.L	slc26a6	LOC108698374		cep350.S		nupr1
rassf1.L	Xelaev18006086m	adamts6.S		vegt.L	LOC108695509	LOC108695521		zbed1.L		LOC108718134
mast4	pced1a.S	rpain.S		gata6.L	apela	wnt11b.L		ago4.S		arhgef17.L
acap3.L	cldn4.S	mtmr3.L		sel1l3.L	pnpla2.L	LOC108711244		gsap.L		pik3r3.L
arhgap40.S	dhrs3.L	smtn.L		pdp2.L	ventx3.2.S	socs2.L		ppp2r3b.L		rbm38.S
dmxl1.L	fam46a.L	nupr1		LOC108698246	ptger4.L	creb3l4.S		otud7b.S		ints6.L
maff.S	xvent-2b	LOC108718134		Xelaev18036449m	bicd1	stard13.S		idh3a.L		LOC108711716
MGC83487	napb	arhgef17.L		Xelaev18009887m	clic3.L	trpm4		rassf1.L		pik3r1.S
znf292.S	esco2	pik3r3.L		crx.L	LOC108714950	ca14.L		mast4		pcnxl4.L
f2rl1.L	rhob.L	rbm38.S		tdgf1.2.S	dhh.S	lpar2.S		acap3.L		rspry1.L
zcchc14.L	eef1b2	ints6.L		hhip.S	vwc2l.2.L	LOC108695506		arhgap40.S		slc8b1.S
ifnar2.S	tlr2	LOC108711716		LOC100037118	vangl1.L	krt5.7.L		dmxl1.L		cdyl.L
arid4b.L	nrarp	pik3r1.S		nrp2.S	tbx22.S	Xelaev18005946m		maff.S		klhl13.L
arid5b.L	LOC108719479	pcnxl4.L		Xelaev18004736m	uts2r	sh2d3c.L		MGC83487		fam134a.S
sema6d.S	rassf6.S	rspry1.L		aacs.L	vgll4l.L	LOC108698352		znf292.S		traf3.L
tanc1-like.L	rnf144b.S	slc8b1.S		mertk.L	Xelaev18023726m	loc108703073.S		f2rl1.L		muc3a
fam193b.S	msto1.L	cdyl.L		scube2.S	myt1.S	st6galnac2.S		zcchc14.L		scd.L
kmt5b.S	fos.L	klhl13.L		zbtb18.S	LOC108700186	smad7.L		ifnar2.S		fez2.S
zfp36l1	slc35d2	fam134a.S		zswim4.S	LOC108701822	trpv6		arid4b.L		atf5.2.S
dusp19.L	chst2.L	traf3.L		LOC108696704	fam198b.L	p2ry2.L		arid5b.L		lamp2.L
dync1li2.S	stat3.2.L	muc3a		nfkbia.S	hes3.S	upk3b.L		sema6d.S		snx25.L
ccser2.S	LOC108705484	scd.L		fam149a	prdm1.S	emp2.S		tanc1-like.L		lsm14b.S
pex11a.L	LOC108695579	fez2.S		LOC108716731	ddx54	syt10		fam193b.S		r3hdm1.S
nck2.S	tll1-like.1.L	atf5.2.S		nek6	efs.L	efemp2.L		kmt5b.S		narf.L
incenp.L	rbm47.L	lamp2.L		Xelaev18009848m	sema3f.S	pcdha13.L		zfp36l1		birc7.S
atp8a1.L	pgbd5.L	snx25.L		Xelaev18040914m	fzd2.S	sall1		dusp19.L		ints6.S
larp6-like.1.S	mypop.S	lsm14b.S		tfr2.L	LOC108709568	Xelaev18037271m		dync1li2.S		plxnb3.S
trim2.L	LOC108700879	r3hdm1.S		gata5.S	gprc5b.L	mars2		ccser2.S		blm.L
lpar5.S	tfap2c.L	narf.L		Xelaev18005132m	htr1a.S	Xelaev18035393m		xarp.L		gm29884
fam134c.L	LOC108699910	birc7.S		Xelaev18002937m	htra1.S	LOC100158389		pex11a.L		pkd2.L
sema4g.L	LOC108697295	ints6.S		dll1.L	Xelaev18007952m	LOC108704223		nck2.S		sos1.S
zbtb14.L	frem2	plxnb3.S		LOC108704612	scin.L	top2b.L		incenp.L		ubxn2b.L
smc5.S	zfp36l2.L	blm.L		muc5ac	syn1.S	LOC108699904		atp8a1.L		raver1.S
fam13a.L	Xelaev18041975m	gm29884		nuak1	sall3.S	krt5.7.S		larp6-like.1.S		trappc13.L
oaz2.S	hes3.1.L	pkd2.L		Xelaev18042001m	msx2.L	cdk5r1.L		trim2.L		nap1l4.S
tesk2.L	fosl2.S	sos1.S		Xelaev18013398m	Xelaev18003060m	LOC108712218		lpar5.S		rad17.L
pbx3.S	Xelaev18038135m	ubxn2b.L		ccdc141.L	hao2.L	Xelaev18013483m		fam134c.L		orc4.L
ncoa7.L	post5.S	raver1.S		arhgap39	nlrc4.L	lgals3.S		sema4g.L		syap1.S
pcmtd1	fhit.L	trappc13.L		pmp22.S	epn1.S	Xelaev18005310m		zbtb14.L		fam3a.S
sytl2.L	LOC108716547	nap1l4.S		dtx4.L	meis3.S	LOC108698487		smc5.S		MGC98819
bbs12.L	evpl.L	rad17.L		prkcd	LOC108706751	Xelaev18002446m		fam13a.L		abhd2.L
ncapd2.S	vav2.L	orc4.L		fzd8.S	nox1	cyb561.L		oaz2.S		irf2bpl.S
atp10a	rgcc.L	syap1.S		Xelaev18021795m	card9.L	kirrel2.S		tesk2.L		ccdc186.L
kcnk5.S	sall3.L	fam3a.S		lsp1.L	Xetrov90020324m.L	Xelaev18014049m		pbx3.S		rnf44.L
thumpd2.L	LOC108696255	MGC98819		myb.S	prph.L	LOC100491629.L		ncoa7.L		dedd.L
pias1.S	chst9	abhd2.L		fbn2	Xelaev18012386m	Xelaev18014048m		pcmtd1		ormdl1.S
tspoap1.L	LOC108715137	irf2bpl.S		fbn1.S	cib3	LOC108714321		sytl2.L		depdc1b.L
Xelaev18038459m	sfrp2.S	ccdc186.L		LOC108711791	LOC108716791	traf4.S		bbs12.L		ranbp2.L
tpcn2.L	gprc5c.S	rnf44.L		LOC108713742	krt.L	dlx3.L		ncapd2.S		aktip.S
pak4	cluh	dedd.L		gata4.L	LOC108708517	nxpe3l.2.L		atp10a		cnksr2.L
lifr.S	loxl1.L	ormdl1.S		LOC108717200	LOC108713828	lrrc75b		kcnk5.S		slc48a1.S
xrcc6.L	fth1.L	depdc1b.L		fam3d.S	LOC108697537	LOC108698461		thumpd2.L		atf7.S
mis18a.L	fmc1.L	ranbp2.L		LOC108713650	tnfsf10.S	hs3st3a1.L		pias1.S		med13l.S
rab5d.S	LOC108711412	aktip.S		LOC108695812	plxdc1	itpr3		tspoap1.L		cbwd1.1.L
mb21d2.L	mapre2.S	cnksr2.L		Xelaev18040771m	sds.L	LOC108714970		Xelaev18038459m		fndc3a.S
scai	lypd6.L	slc48a1.S		htra1.L	Xelaev18023827m	has-rs.S		tpcn2.L		npat.S
klf6.L	atf3.L	atf7.S		sst.S	tmem265.L	ckap4.S		pak4		tmem110.L
osbpl3.L	plk2.L	med13l.S		nr5a2.L	rgl2	LOC108704510		lifr.S		tpgs1.L
vamp4.L	slc35f6	cbwd1.1.L		gja4.L	Xelaev18034047m	LOC108719506		xrcc6.L		snx13.L
rgcc.S	LOC108698216	fndc3a.S		noxo1	epas1.S	LOC108707237		mis18a.L		usp44.S
kif4a.L	azin2.S	npat.S		creb3l4.L	xepsin.L	Xelaev18022009m		rab5d.S		tbp.S
cep104.S	ras-dva1.L	tmem110.L		LOC108700767	dmrt2.S	pcdh7.S		mb21d2.L		LOC108698822
scpep1.L	LOC108698396	tpgs1.L		LOC108710968	LOC100497556.L	glis2.L		scai		slc25a37.L
ppp1cc.L	cldn23	snx13.L		hoxc12.S	LOC108719253	LOC105945479.S		klf6.L		kmt2e.S
abl2.L	Xelaev18001309m	usp44.S		Xetrov90018634m.L	cbarp.L	lrrc56.L		osbpl3.L		atxn7l1.S
csgalnact2.L	kit.L	tbp.S		LOC108696040	nkain1.L	LOC108719533		vamp4.L		atad3a.S
tpcn1	klf17.L	LOC108698822		Xelaev18039988m	arl4c.S	LOC108711414		rgcc.S		anln-like.1.L
ei24.S	ackr3.S	slc25a37.L		tbc1d5	zfp36.S	hunk.S		kif4a.L		mkl1.S
ppp2r2d	pnhd.L	kmt2e.S		trarg1.L	LOC108718863	msx1.S		cep104.S		rgs3.S
ralgapb.L	LOC108717645	atxn7l1.S		LOC108718316	wfdc2.L	sh2d3c.S		scpep1.L		fam83g.L
tnfsf11.S	ablim1	atad3a.S		sox17b.2.L	Xelaev18013173m	gatm.L		ppp1cc.L		mgc69520.S
LOC108698338	lhx5.S	anln-like.1.L		nectin1l2.2.S	ccnd1.S	cdk5r1.S		abl2.L		wdr59.L
ypel1.S	znf581.S	mkl1.S		prelid3a.L	LOC108699553	LOC108695513		csgalnact2.L		dnaja4.2.S
nadk.S	slc2a2.L	rgs3.S		six2.S	LOC108715890	lin28a.S		tpcn1		plpp6.S
prdm2.S	LOC108719789	fam83g.L		LOC108706543	degs3.L	cerk		ei24.S		mos.L
det1.L	chkb.S	mgc69520.S		LOC108706156	LOC108710290	doc2a.S		ppp2r2d		fam104a.S
dnaja3.S	id3.L	wdr59.L		Xetrov90029923m.S	MGC52622	lhx3.S		ralgapb.L		ino80d.L
snx7.S	LOC108715808	dnaja4.2.S		Xelaev18000237m	Xelaev18018260m	lct.1.L		tnfsf11.S		cables1.L
birc7.L	MGC115235	plpp6.S		chrna4.L	rpe65.S	adam9		LOC108698338		sik3.L
zcchc14.S	Xelaev18005230m	mos.L		p2ry11.S	ccnd1.L	LOC108709654		ypel1.S		fam83d.S
LOC108713924	LOC108703754	fam104a.S		LOC108697967	LOC108715703	Xelaev18038498m		nadk.S		galnt4.L
cse1l.S	abcb1	ino80d.L		LOC108713819	Xelaev18014160m	tbkbp1.L		prdm2.S		bri3.L
rab3a.L	styk1	cables1.L		LOC108718886	crabp2.L	hunk.L		det1.L		dtl.S
tnrc6c.S	epn3.L	sik3.L		mnx1.L	eppk1.L	LOC108709649		dnaja3.S		tfeb.S
cnot8.S	loc100487022.L	fam83d.S		lhx1.S	dnah1.L	pou5f3.1.S		snx7.S		lmo4.2.L
mast4.S	xetrov90011961m.L	galnt4.L		bix1.1.L	ventx1.1.S	fgfr2.S		birc7.L		znf577.S
wnk3.L	hes3.1.S	bri3.L		snai2.L	LOC108716735	alcam.S		zcchc14.S		etaa1.L
cmip.L	Xelaev18025740m	dtl.S		cfb.L	ventx1.2.S	vegt.S		LOC108713924		chmp1a.S
irf2bp2.S	LOC108711502	tfeb.S		slc2a1.L	marc1-like.L	ror2.L		cse1l.S		rnf138.S
spopl.S	ras-dva1.S	lmo4.2.L		snai1.S	fer1l4	loc100496061.L		rab3a.L		siah2.L
txndc11.L	LOC108719577	znf577.S		fam131b.S	ventx3.2.L	kiaa1324l.S		tnrc6c.S		myo19.S
tor2a.L	prelid1.L	etaa1.L		Xetrov90018471m.L	rsad2.S	fzd2		cnot8.S		arhgap35.S
mgat3.L	sec14l3.L	chmp1a.S		hoxc12.L	cyp2u1.L	Xelaev18003895m		mast4.S		gtf2ird2b
haus8.L	Xelaev18003044m	rnf138.S		trpc6.L	foxi4.1.L	LOC108699475		wnk3.L		tbc1d9b
syne2.2.S	klf5.L	siah2.L		wnt11.L	gata3.S	casp7		cmip.L		spryd3.L
helq.S	LOC100191024	myo19.S		f2rl2.L	Xelaev18004347m	LOC100490918.L		irf2bp2.S		sema4d
ncor1.S	LOC108697345	arhgap35.S		dhcr7.L	c2cd4d.S	LOC108711841		spopl.S		ralgapa2.L
enc1.S	dnajb4.L	gtf2ird2b		neurod2.L	pygb.S	a2m.S		txndc11.L		apaf1.L
akap10.L	cyfip2	tbc1d9b		tfap2b.S	Xetrov90014299m.L	LOC108698113		tor2a.L		zfand4.L
rfwd3.L	hal.1.L	spryd3.L		LOC108706202	socs1.L	Xelaev18003957m		mgat3.L		senp7.L
rb1cc1.L	adap1.L	sema4d		Xelaev18027229m	mmp19.L	itprip.L		haus8.L		MGC84185
dock7.L	fam189b.L	ralgapa2.L		rnf112.S	LOC108712963	klhl23.L		syne2.2.S		sos1.L
apc.L	timp-1.L	apaf1.L		Xelaev18017453m	slc26a4.S	Xelaev18008693m		helq.S		mpp5.S
triobp.S	tmem229a.L	zfand4.L		Xelaev18002673m	trim29.S	Xelaev18000325m		ncor1.S		cdc37l1.S
ncoa2.S	Xelaev18038969m	senp7.L		hhex.S	Xelaev18000128m	ist1		enc1.S		ndst2.L
ell.S	dmrt2.L	MGC84185		LOC101733813.1	LOC108696785	cyp26b1.L		akap10.L		sike1.S
ccnb2.S	Xelaev18027991m	sos1.L		mrc1	fut3.L	lin28a.L		rfwd3.L		atp6v0a2.L
hbp1.L	pax3.S	mpp5.S		Xelaev18012936m	Xelaev18046181m	LOC108695556		rb1cc1.L		irf2.L
cpeb3.S	LOC108718070	cdc37l1.S		tsc22d4	LOC105945417.L	LOC108696832		dock7.L		fasn.L
akap13.L	rsad2.L	ndst2.L		arhgef3.2.S	Xelaev18005524m	akap2.S		apc.L		gemin5.L
prr14l.L	rfx4.L	sike1.S		Xelaev18006002m	LOC101733888.L	acod1l.L		triobp.S		ccdc186
lats2.L	ag1.L	atp6v0a2.L		LOC108702593	gdpd1.L	znf268.L		ncoa2.S		scyl2.S
rlf.S	LOC108715136	irf2.L		niban2	nedd4l	loc100494211.S		ell.S		gse1.L
cep152.L	LOC108704293	fasn.L		Xelaev18004563m	pros1.S	wnt5b.S		ccnb2.S		ccdc138.L
mfsd6.S	cmtm8.L	gemin5.L		ca14.S	scnn1a.L	cyp27a1		hbp1.L		znrf1.S
mdm2.S	nlgn3.L	ccdc186		prkab2.S	ptprj	irg1.L		cpeb3.S		stk10.L
setd1b.S	LOC108719633	scyl2.S		ifit5	LOC108698798	gli1.L		akap13.L		slc35f5.L
dync1li2.L	LOC108706886	gse1.L		slitrk5.S	Xelaev18001689m	LOC108705899		prr14l.L		paxip1.S
ckap5.L	Xelaev18017777m	fos.S		dnase1l3	pax6.L	LOC108700779		lats2.L		med13.S
grk3	tat.S	ccdc138.L		ednra.S	wasf3	plekhg2.S		rlf.S		tcf7.S
dop1a	msx2.S	znrf1.S		eps8l2.S	LOC108698355	dlx3.S		cep152.L		ddx3x.L
tpst2.L	id3.S	stk10.L		hcar3.L	LOC108706358	smad7.S		mfsd6.S		agap1.L
fbxo33.L	ikbkg.S	slc35f5.L		cbln2.S	cd99l2.S	cd99l2.L		mdm2.S		tnfsf11.L
tmem64.L	Xelaev18029313m	paxip1.S		Xelaev18005944m	vwf	LOC108701721		setd1b.S		mfsd14a.S
fkbp4.L	tuba1a.S	med13.S		pigz.L	egr3.S	LOC100489607.1		dync1li2.L		plxna3.S
asap2	LOC108704294	tcf7.S		prickle3	vamp5.L	rbbp8nl.L		ckap5.L		slc6a16.S
optn.L	sspo	ddx3x.L		itga4.S	Xelaev18040899m	Xelaev18029353m		grk3		iffo2
ddhd1.L	Xelaev18016063m	agap1.L		fzd8.L	ventx1.1.L	apcdd1.S		dop1a		enpp2.L
larp6-like.1.L	pdk4.L	tnfsf11.L		dusp10.2.S	LOC108700765	il10rb.L		tpst2.L		ndel1.S
zfyve16.L	bmp3.S	mfsd14a.S		edn2.S	syt8.L	Xelaev18009885m		fbxo33.L		enc1.2.L
znf84	ackr3.L	plxna3.S		xdh.S	irf1.L	shbg		tmem64.L		LOC108709286
fbxl3.S	pnhd.S	slc6a16.S		tuft1.L	hpgd.S	epha4.L		fkbp4.L		haus2.L
emd.S	LOC108701168	iffo2		LOC108708505	Xelaev18036730m	LOC108703380		asap2		esg2-a
rpa1.L	tmem158.S	enpp2.L		LOC108704569	p2ry2.S	LOC108714958		optn.L		prkcsh.L
rnf146.S	trim67.S	ndel1.S		sstr1.L	btc.L	cd274.L		ddhd1.L		adnp2.L
kif18a.L	plcd3.L	enc1.2.L		LOC108720014	fam83f.S	LOC108717895		larp6-like.1.L		pim3.L
pacsin3.L	cbln1	LOC108709286		LOC108712221	LOC108712697	acod1		zfyve16.L		rin3.L
evi5.S	Xelaev18004205m	haus2.L		Xelaev18009605m	apoc1-like.L	phldb3.S		znf84		fgfr3
znf654.L	ppp1r27	esg2-a		fli1b.L	sst.2	fam83c.L		fbxl3.S		scap.L
spire2.S	c15orf39.S	prkcsh.L		dnhd1	kbtbd11.L	cxcl11.L		emd.S		smad2.S
traf3ip1.S	LOC108702918	adnp2.L		muc3b	Xelaev18003524m	chrd		rpa1.L		pde8a
ttc8.L	ar.L	pim3.L		LOC108703547	pts.S	LOC108717924		rnf146.S		cyp2r1.L
mtmr4.L	LOC108712518	rin3.L		vps37d.S	cfp	LOC108717350		kif18a.L		chd1.S
ets1.S	syn1.L	fgfr3		catip.L	Xelaev18025621m	pou5f3.1.L		pacsin3.L		ppp1r12a.S
hhipl1.L	hesx1.L	xarp.L		fgf20.S	Xelaev18043100m	dll1.S		evi5.S		morf4l1.L
gnpat.S	Xelaev18011395m	scap.L		hoxd9.S	snap25	wnt5b.L		znf654.L		ptpn3.S
nrip1.S	efnb3	smad2.S		LOC108703460	LOC108713032	cacng4.L		spire2.S		tle4.S
med14.L	cks1b.L	pde8a		sox17b.1.S	Xelaev18009383m	LOC108702643		traf3ip1.S		stk17a.S
rab8a.L	ptch2.L	cyp2r1.L		sox17a.L	LOC108700185	cish.S		ttc8.L		LOC108716761
ak2.S	LOC108711532	chd1.S		map3k14.S	LOC108696520	Xelaev18003954m		mtmr4.L		scnm1.L
kif11.S	LOC108718449	ppp1r12a.S		bmp7.1.L	gpr65.S	tnfsf10l.L		ets1.S		rapgef2.S
insr.S	ptch2.S	morf4l1.L		styk1.S	nr1i3.S	usp43.L		hhipl1.L		kxd1.L
ado.L	LOC108708413	ptpn3.S		gli3.L	tmigd1	tph1.S		gnpat.S		atg4a.L
taf4.L	LOC108709387	tle4.S		npbwr2	podxl	cxcl10.L		nrip1.S		tbpl1.L
sprtn.S	zic3.L	stk17a.S		il16.L	nxpe2.L	cdh1.S		med14.L		adgrl2.S
vps13c.L	adap2.L	LOC108716761		pou3f1.L	Xelaev18034532m	cdon.L		rab8a.L		rlim.S
cnp.L	LOC108700281	scnm1.L		LOC108704529	mfap2.L	itga6.L		ak2.S		pmfbp1.L
pacrgl.L	gpr34	rapgef2.S		cacnb1.S	l3mbtl1.S	clca3.L		kif11.S		zbtb5.S
tdrd6.L	olig4.S	kxd1.L		LOC108708391	LOC108716723	LOC108704568		insr.S		irs1.S
socs7.S	kcna3.S	atg4a.L		xhoxc8	ventx1.2.L	Xelaev18035319m		ado.L		cenpj.L
rab8a.S	LOC108703541	tbpl1.L		plekhg5.L	rflcii.L	slc7a8.S		taf4.L		trappc13.S
osbpl3.S	LOC108716739	adgrl2.S		gata6.S	gal3st4-like.2.L	zeb2.S		sprtn.S		tbc1d31.L
tor1a.S	LOC100192369	rlim.S		LOC108705130	nr1i3.L	ltbr		vps13c.L		fbxo31.L
hps6.L	gas2l1.L	pmfbp1.L		relt.S	dennd2a.L	znf608		cnp.L		orc1.L
mapre3.L	apela.S	zbtb5.S		foxa1.S	Xelaev18022785m	c22orf15.L		pacrgl.L		sertad2
grinl1a.L	LOC108701666	irs1.S		pou3f1.S	cdx1.S	LOC108712667		tdrd6.L		golga5.S
prc1.2.L	LOC108705810	cenpj.L		LOC108698417	foxi4.1.S	tril.L		socs7.S		fam53c.S
slc30a4.L	LOC100496293.L	trappc13.S		pycard.S	gata3.L	sp6.L		rab8a.S		msantd3.S
tmcc3.S	slc34a2.L	tbc1d31.L		LOC108699675	Xelaev18002791m	c3ar1.L		osbpl3.S		wdr7.S
mxd1.L	aldh1l1.L	fbxo31.L		agr2.S	Xelaev18022784m	arg1.L		tor1a.S		depdc7.S
c15orf39.L	tmem163.S	orc1.L		tbx6	Xelaev18015096m	plekhn1.L		hps6.L		arrdc1.S
tcirg1.L	LOC108696788	sertad2		Xelaev18035970m	post3.S	LOC108704127		mapre3.L		cttnbp2nl.L
phactr4.L	krt.S	golga5.S		LOC108711628	fcn2	tbc1d24.2.S		grinl1a.L		kdm4c.S
ophn1.L	fcn1	fam53c.S		htr5a.L	cdx4.S	gpr65.L		prc1.2.L		ntmt1.S
epb41l4b.S	rnf225	msantd3.S		adm.L	LOC108711579	mid1ip1.L		slc30a4.L		dact1.S
wdfy2.L	slc16a3	wdr7.S		Xelaev18002950m	LOC100487224.L	neurl1b.L		tmcc3.S		fastkd1.L
kif3a.S	cdc25b.S	depdc7.S		chrd.2.L	polm.L	itprip.S		mxd1.L		disp1.S
plk1.S	hsp90aa1.1.L	arrdc1.S		sox18.L	elavl3	xk81a1.L		c15orf39.L		tbc1d14.L
ubap1.L	apold1.L	cttnbp2nl.L		klb.S	LOC108709519	LOC108703375		tcirg1.L		casp2
lats1.S	LOC108719537	kdm4c.S		LOC100495222.1.L	c9.L	LOC108701422		phactr4.L		gse1.S
kdm5b.S	Xelaev18039704m	ntmt1.S		areg.S	pnliprp1	Xelaev18029244m		ophn1.L		gtf2h2.S
rnf169.S	Xelaev18036472m	dact1.S		en1.L		LOC100489157-like.S		epb41l4b.S		hip1r.S
top2a.L	sds.S	fastkd1.L		colca2.L		gs17.S		wdfy2.L		sphk1.L
setbp1.L	LOC108706865	disp1.S		Xelaev18042237m		alpl.L		kif3a.S		sec24b.S
socs6.L	Xelaev18029191m	tbc1d14.L		krt15		st6galnac2.L		plk1.S		spice1.L
adamts6	Xelaev18012294m	casp2		LOC108717617		plekhg5.S		ubap1.L		fam53a.L
ippk.S	slc26a6	gse1.S		LOC108709763		Xelaev18038470m		lats1.S		vezt.L
nlrx1.L	LOC108695509	gtf2h2.S		Xelaev18032449m		LOC108715368		kdm5b.S		eda.L
pak4.L	apela	hip1r.S		nr5a2.S		Xelaev18045196m		rnf169.S		mad2l1bp-like.L
rell1.L	pnpla2.L	sphk1.L		vgll3.L		lypd2.L		top2a.L		plpp6.L
creb3l2.S	ventx3.2.S	sec24b.S		Xelaev18016829m		sema3f.L		setbp1.L		map2k4.S
csnk1d.L	ptger4.L	spice1.L		pkdcc.2.S		Xelaev18035105m		socs6.L		kazn.L
limd2.S	bicd1	fam53a.L		LOC108700092		lpar2.L		adamts6		ubn2.S
sox11.L	clic3.L	vezt.L		mx1		sox7.S		ippk.S		elk4.S
fam193a.S	LOC108714950	eda.L		cd80.L		MGC76328.L		nlrx1.L		katnbl1.S
sap30.S	dhh.S	mad2l1bp-like.L		stx1b.L		col4a6.L		pak4.L		fut11.L
ttc31.L	vwc2l.2.L	plpp6.L		ccndx.S		atp12a		rell1.L		pdzd8.L
pgm3.L	vangl1.L	map2k4.S		hoxc9.S		fam212a.S		creb3l2.S		ccdc171
dpp3.L	tbx22.S	kazn.L		tril.S		anpep.S		csnk1d.L		rxrg.L
inpp4b	uts2r	ubn2.S		Xelaev18008846m		c17orf58.L		limd2.S		bmp2.S
tmem131l.L	vgll4l.L	elk4.S		fgf20.L		cnr2.S		sox11.L		spdyc.L
eif6.S	Xelaev18023726m	katnbl1.S		Xelaev18006376m		lhx3.L		fam193a.S		spdl1.L
dlc1	myt1.S	fut11.L		LOC108717287		Xelaev18014773m		sap30.S		LOC108719489
myo1e.1.L	LOC108700186	pdzd8.L		Xetrov90023614m.L		foxj1.L		ttc31.L		med13.L
pou5f3.3.S	LOC108701822	ccdc171		myoc.L		ahnak.S		pgm3.L		msantd3.L
tor1aip1-like.L	fam198b.L	rxrg.L		mab21l3.S		atp1a3.L		dpp3.L		baz1b.L
usp1.S	hes3.S	bmp2.S		kcna2.S		phldb3.L		inpp4b		tmem214.S
gxylt1.L	prdm1.S	spdyc.L		gdf3.S		atp1b2		tmem131l.L		coq6.L
tshz3.S	ddx54	spdl1.L		faim2.S		lrrn1.L		eif6.S		leprot.L
tpst2.S	efs.L	LOC108719489		snai1.L		hamp2.L		dlc1		sept8.S
snx10.S	sema3f.S	med13.L		gucy1b2		ervfrd-1		myo1e.1.L		pcif1.L
rhof.S	fzd2.S	msantd3.L		Xelaev18042907m		akna.S		pou5f3.3.S		aak1.S
bbs2.S	LOC108709568	baz1b.L		nodal3.2.L		Xelaev18042923m		tor1aip1-like.L		mllt1.L
arhgef12.S	gprc5b.L	tmem214.S		LOC100495966		Xelaev18026940m		usp1.S		ccdc94.L
cenpn.S	htr1a.S	coq6.L		sncb.L		pygm.S		gxylt1.L		rassf3.S
kdm5b	htra1.S	leprot.L		noxa1.L		nxpe2p1		tshz3.S		mex3d.L
tbc1d8	Xelaev18007952m	sept8.S		map3k19.L		sox8.L		tpst2.S		tex264
LOC108714398	scin.L	pcif1.L		Xelaev18003943m		mig30.L		snx10.S		sertad2.L
dnajc16.S	syn1.S	aak1.S		LOC108701312		LOC108709430		rhof.S		def8.L
MGC52683	sall3.S	mllt1.L		zscan5a		aplnr.L		bbs2.S		numb.L
pias3.L	msx2.L	ccdc94.L		antxr2.S		cdx2.L		arhgef12.S		rasef.S
znf292.L	Xelaev18003060m	rassf3.S		LOC108702204		sox18.S		cenpn.S		LOC108703834
tspan1.L	hao2.L	mex3d.L		lzts1.L		prss36.L		kdm5b		mgll.L
psat1.S	nlrc4.L	tex264		htra3.S		arhgef19.L		tbc1d8		apc.S
c16orf62.S	epn1.S	sertad2.L		rasip1.L		meis3.L		LOC108714398		ptpn12.L
cdadc1.S	meis3.S	def8.L		st6gal1.L		nradd.L		dnajc16.S		vps54.L
slc25a38	LOC108706751	numb.L		slitrk1.S		LOC108715348		MGC52683		men1.L
habp4.L	nox1	rasef.S		Xelaev18011386m		krt12.S		pias3.L		dph6.L
vps37a.S	card9.L	LOC108703834		Xelaev18047274m		kctd15.L		znf292.L		MGC83673
lipg.L	Xetrov90020324m.L	mgll.L		LOC108708636		Xelaev18037263m		tspan1.L		degs1.S
ulk2.L	prph.L	apc.S		krt222		kitlg.L		psat1.S		arhgef7.L
rad1.L	Xelaev18012386m	ptpn12.L		LOC108713700		elovl3.L		c16orf62.S		ncoa6.S
fam13a.S	cib3	vps54.L		pycard.L		cxorf21.S		cdadc1.S		ccnyl1.S
hmgcs1.S	LOC108716791	men1.L		LOC108705132		Xelaev18001991m		slc25a38		rcan3.L
rab9a.L	krt.L	dph6.L		Xelaev18034666m		Xelaev18005943m		habp4.L		usp49.S
cdc42bpb.L	LOC108708517	MGC83673		pnck.L		efnb2.S		vps37a.S		Xetrov90023445m.L
polr2j.L	LOC108713828	degs1.S		hoxd10.S		col4a5.L		lipg.L		rnf112.1.S
pex12.L	LOC108697537	arhgef7.L		LOC108705770		trim29.L		ulk2.L		cep112
syde2.S	tnfsf10.S	ncoa6.S		sftpb.S		trpm5.L		rad1.L		tanc1-like.S
epc1.S	plxdc1	ccnyl1.S		pex5l.S		mst1.L		fam13a.S		strbp.L
c11orf96.S	sds.L	rcan3.L		nrip3.L		kiaa1324.S		hmgcs1.S		nus1.L
spsb4.L	Xelaev18023827m	usp49.S		LOC108707804		pou6f1.L		rab9a.L		etv3l.S
MGC79091	tmem265.L	Xetrov90023445m.L		Xelaev18002252m		mmp14.L		cdc42bpb.L		kazn.S
usp37.L	rgl2	rnf112.1.S		kctd12.L		capn8.S		polr2j.L		bcl11b.S
Xelaev18028646m	Xelaev18034047m	cep112		fam167a.S		lsp1.S		pex12.L		tmem51.L
tmem128.S	epas1.S	tanc1-like.S		Xelaev18045520m		efnb2.L		syde2.S		ect2.S
zfyve9.S	xepsin.L	strbp.L		prr5l.L		fam26e.S		epc1.S		faim.S
rab5c.L	dmrt2.S	nus1.L		LOC108713121		foxi1.S		c11orf96.S		mllt4.L
ccnb1.L	LOC100497556.L	etv3l.S		lgi4.L		fgd1.L		spsb4.L		paqr3.L
ube2z.S	LOC108719253	kazn.S		slitrk3.S		LOC108715654		MGC79091		myo10.2.L
cdca2-like.S	cbarp.L	bcl11b.S		hoxd10.L		Xelaev18038471m		usp37.L		dand5.L
ccnb1.S	nkain1.L	tmem51.L		mix1.L		hes7.2.S		Xelaev18028646m		klhl15.L
arhgap20	arl4c.S	ect2.S		LOC108715719		has2.L		tmem128.S		gigyf2.S
ccdc50	zfp36.S	faim.S		hhex.L		szl.L		zfyve9.S		pds5b.L
ttc17.S	LOC108718863	mllt4.L		Xelaev18018965m		elavl3.L		rab5c.L		prc1.2.S
fyn.S	wfdc2.L	paqr3.L		fgd1		f3.S		ccnb1.L		blm.S
blcap.L	Xelaev18013173m	myo10.2.L		mgst2		fam212a.L		ube2z.S		dip2b
homer2.L	ccnd1.S	dand5.L		gpr45.S		Xelaev18017809m		cdca2-like.S		mga.L
wdr37.S	LOC108699553	klhl15.L		foxj2-b		lefty.S		ccnb1.S		bclaf1.S
irf2.S	LOC108715890	gigyf2.S		hmx3.L		Xetrov90026452m.S		arhgap20		gnai2.S
smg6.L	degs3.L	pds5b.L		mesp2.S		kiaa1324l.L		ccdc50		stambp.S
zbtb8b.L	LOC108710290	prc1.2.S		sox12.L		Xelaev18043700m		ttc17.S		haus6.L
slf2.L	MGC52622	blm.S		nkx2-5.L		Xelaev18001971m		fyn.S		mbd4.L
mia3	Xelaev18018260m	dip2b		pear1.L		gsc.S		blcap.L		mpp5.L
pde6d.L	rpe65.S	mga.L		ccl20.L		ngfr.S		homer2.L		wtip.S
hook1.S	ccnd1.L	bclaf1.S		wnt16.L		LOC108696320		wdr37.S		efcab14.L
kifc3.S	LOC108715703	gnai2.S		pax1		foxj1.S		irf2.S		aak1
slc39a10.L	Xelaev18014160m	stambp.S		Xelaev18036955m		MGC80993		smg6.L		wdr37.L
selenon.L	crabp2.L	haus6.L		rem1.L		fgf8.S		zbtb8b.L		irf9.L
rab11fip1.L	eppk1.L	mbd4.L		slc9a4.L		lefty.L		slf2.L		ext1.L
pcyt1a.S	dnah1.L	mpp5.L		gas2l2.S		Xelaev18026939m		mia3		pdik1l.S
cpeb2-like.L	ventx1.1.S	wtip.S		rom1.S		loc100497729.L		pde6d.L		cspp1.L
foxh1.L	LOC108716735	efcab14.L		ngef.S		dhx58.L		hook1.S		socs5.S
cse1l.L	ventx1.2.S	aak1		Xelaev18032910m		kcnj15.L		kifc3.S		tbccd1.L
c19orf12.S	marc1-like.L	wdr37.L		LOC108710750		flrt3.L		slc39a10.L		atat1.S
ago1.L	fer1l4	irf9.L		LOC101732299.L		Xetrov90015528m.L		selenon.L		cpeb4.S
oat.1.L	ventx3.2.L	ext1.L		mesp2.L		chrna2.L		rab11fip1.L		mgea5.S
fntb.L	rsad2.S	pdik1l.S		Xelaev18000681m		fgf8.L		pcyt1a.S		katnb1.L
hlf.S	cyp2u1.L	cspp1.L		Xelaev18019163m		pdgfa.L		cpeb2-like.L		zrsr2.L
pik3r4.S	foxi4.1.L	socs5.S		pax3.L		LOC108716397		foxh1.L		coq10a.L
txndc9.L	gata3.S	tbccd1.L		Xelaev18013481m		unc93a.L		cse1l.L		slc25a44.S
slc35a5.S	Xelaev18004347m	atat1.S		LOC108697063		eomes.S		c19orf12.S		sgk223.L
orai2.L	c2cd4d.S	cpeb4.S		vstm2b.L		nodal.L		ago1.L		ccdc14
tnrc6b.S	pygb.S	mgea5.S		Xelaev18001114m		c3.L		oat.1.L		nek2.S
casc4.S	Xetrov90014299m.L	katnb1.L		pex13		clcf1.L		fntb.L		ahctf1.L
usp1.L	socs1.L	zrsr2.L		vsx2.S		Xelaev18001619m		hlf.S		pik3r1.L
ildr1.S	mmp19.L	coq10a.L		ralyl.S		slc38a2.L		pik3r4.S		sipa1l3.L
foxo3.L	LOC108712963	slc25a44.S		spib.S		rgs2.L		txndc9.L		jade3.L
klf4.L	slc26a4.S	sgk223.L		hoxc10		tmprss9.S		slc35a5.S		axin1.L
vps50.L	trim29.S	ccdc14		muc1.S		1a11.L		orai2.L		cep126
sin3b.S	Xelaev18000128m	nek2.S		ntn3.L		npy2r-like.1.L		tnrc6b.S		MGC85120
trim8.L	LOC108696785	ahctf1.L		lef1.L		cass4.S		casc4.S		git2.L
kmt2b	fut3.L	pik3r1.L		bmper.L		LOC108719085		usp1.L		rsf1.S
eml1	Xelaev18046181m	sipa1l3.L		scn2b.L		LOC108705022		ildr1.S		zbtb33.L
cep350.L	LOC105945417.L	jade3.L		cep19.L		bix1.2.L		foxo3.L		gpr157.L
evi5.L	Xelaev18005524m	axin1.L		LOC495206		MGC79993		klf4.L		jade3.S
mgc89871.S	LOC101733888.L	cep126		Xelaev18011064m		wnt7a		vps50.L		fgfr1.S
emc1.L	gdpd1.L	MGC85120		ifnl3		bix1.3.S		sin3b.S		znf268
gatad2b	nedd4l	git2.L		nodal.S		eomes.L		trim8.L		tfe3.S
fdxacb1.L	pros1.S	rsf1.S		shh.S		loc495835.L		kmt2b		rnf115.S
spg21.L	scnn1a.L	zbtb33.L		pnpla7.L		chgb.L		eml1		ptcd2.L
mst1r.L	ptprj	gpr157.L		nr2f1.L		gata2.S		cep350.L		sdhd.S
cct4.L	LOC108698798	jade3.S		igfbp4.L		nptx2.S		evi5.L		katnb1.S
stox2.L	Xelaev18001689m	fgfr1.S		slc16a5-like.S		chrd.L		mgc89871.S		cep85.L
c5orf24.S	pax6.L	tgif2.S		c1ql1		LOC108719420		emc1.L		fnbp1l
tnks2.S	wasf3	znf268		Xelaev18033293m		afap1l2.L		gatad2b		slc39a14.L
kpna2.L	LOC108698355	tfe3.S		znf410		flrt3.S		fdxacb1.L		atl2-like.S
rufy3.L	LOC108706358	rnf115.S		mfsd2a.L		cass4.L		spg21.L		LOC108709196
kat6a.L	cd99l2.S	ptcd2.L		pitx2.S		bix1.3.L		mst1r.L		wasll.L
rnf4-a	vwf	sdhd.S		LOC108716865		LOC100492708		cct4.L		zbtb6.S
usp15.S	egr3.S	katnb1.S		Xetrov90024317m.L		mixer.L		stox2.L		myc.S
plcl2.L	vamp5.L	cep85.L		LOC108718080		mespa.S		c5orf24.S		MGC115510
cep55-like.L	Xelaev18040899m	fnbp1l		spns2.S		foxa4.S		tnks2.S		cc2d1b.S
fam46b.S	ventx1.1.L	slc39a14.L		chst3.L		mixer.S		kpna2.L		poc5.L
cep192.L	LOC108700765	atl2-like.S		LOC108716734				rufy3.L		mtbp.S
smad2.L	syt8.L	LOC108709196		emx2.L				kat6a.L		loc100493164.L
mfsd6.L	irf1.L	wasll.L		Xelaev18003951m				rnf4-a		zic2.S
cyp17a1.L	hpgd.S	zbtb6.S		MGC82209				usp15.S		arhgap32.L
rif1.S	Xelaev18036730m	myc.S		pcdh8l.S				plcl2.L		peli1.L
svil.L	p2ry2.S	MGC115510		rorb.L				cep55-like.L		prc1.S
pygo2.L	btc.L	cc2d1b.S		lhx1.L				fam46b.S		taf4b.S
lrrk1.L	fam83f.S	poc5.L		LOC108704130				cep192.L		socs5.L
cxadr.L	LOC108712697	mtbp.S		amigo2				smad2.L		sh2b3.L
rnf169.L	apoc1-like.L	loc100493164.L		fbn2.S				mfsd6.L		rasa1.L
LOC108705473	sst.2	zic2.S		klhdc8a.S				cyp17a1.L		pwwp2b.L
panx1.L	kbtbd11.L	arhgap32.L		LOC108697572				rif1.S		kif23.L
LOC108717918	Xelaev18003524m	peli1.L		Xetrov90015502m.L				svil.L		tubgcp3.S
grhl1.L	pts.S	prc1.S		LOC108714665				pygo2.L		peli1.S
slc25a28.L	cfp	taf4b.S		gsc.L				lrrk1.L		timm23.L
zfyve19.L	Xelaev18025621m	socs5.L		Xelaev18026287m				cxadr.L
wars.L	Xelaev18043100m	sh2b3.L		npas2.L				rnf169.L
xzar2	snap25	rasa1.L		LOC108718887				LOC108705473
nus1.S	LOC108713032	pwwp2b.L		LOC108710786				panx1.L
saysd1.L	Xelaev18009383m	kif23.L		LOC108699131				LOC108717918
rps6ka5.L	LOC108700185	tubgcp3.S		hoxb3.L				grhl1.L
snx1.S	LOC108696520	peli1.S		rerg.L				slc25a28.L
araf.L	gpr65.S	timm23.L		hao1.L				zfyve19.L
cpeb4	nr1i3.S	hnrnpab.L		ppp1r16b.S				wars.L
arhgef18.S	tmigd1	ddx39		Xelaev18000337m				xzar2
znf143.L	podxl	h3-3b		foxa4.L				nus1.S
lyrm4.L	nxpe2.L	prmt1.L		hoxc8.S				saysd1.L
nde1.S	Xelaev18034532m	prmt1.S		barhl1.L				rps6ka5.L
styx.L	mfap2.L	hmgb3.S		Xelaev18034023m				snx1.S
zbtb8b.S	l3mbtl1.S	u2af2.S		wnt5a.L				araf.L
pip5k1a	LOC108716723	sra1.L		LOC108717435				cpeb4
mink1	ventx1.2.L	bsg.L		onecut2.S				arhgef18.S
kiaa0922.S	rflcii.L	spint2.L		LOC108715896				znf143.L
fkbp6.L	gal3st4-like.2.L	hmgn2.L		sia1.L				lyrm4.L
mcm3.L	nr1i3.L	srsf1.L		glipr2.S				nde1.S
wdr62	dennd2a.L	hspa8.L		Xelaev18032521m				styx.L
ppp3cc.S	Xelaev18022785m	h3f3b.L		LOC108719251				zbtb8b.S
ddx1.L	cdx1.S	midn.L		pth1r.L				pip5k1a
dock9	foxi4.1.S	khdrbs1.S		pdgfra.S				mink1
mov10l1.L	gata3.L	cirbp.S		trpm8b.L				kiaa0922.S
arhgef12.L	Xelaev18002791m	MGC52578		hsd17b6				fkbp6.L
gpbp1l1.S	Xelaev18022784m	mcl1.S		Xelaev18021016m				mcm3.L
crebbp.S	Xelaev18015096m	anp32c.S		Xelaev18028212m				wdr62
afdn.S	post3.S	upk1b		slc2a6.L				ppp3cc.S
plxna3.L	fcn2	hmg-17		or10a7				ddx1.L
tmtc3.L	cdx4.S	hmgn1.L		LOC108705598				dock9
adam9.S	LOC108711579	hnrnpu.S		LOC108699856				mov10l1.L
r3hdm1.L	LOC100487224.L	prpf39.1.S		Xetrov90015502m.S				arhgef12.L
camsap1	polm.L	srsf7.S		menf.1.L				gpbp1l1.S
st3gal2.1.L	elavl3	ralb		Xelaev18024303m				crebbp.S
eea1.S	LOC108709519	hmgb2.S		pkdcc.2.L				afdn.S
ddx3x.S	c9.L	nsep1		mespb.S				plxna3.L
plekhg4.L	pnliprp1	hmgb3.L		Xelaev18031473m				tmtc3.L
ing2.L		hnrnpa1.S		prdm12.L				adam9.S
gid8.L		rbmx.L		hoxc13.S				r3hdm1.L
cmtm7.S		hnrnpa2b1.L		cbm101731809provisional				camsap1
araf.S		srsf3.S		fgf3.S				st3gal2.1.L
slc25a25.S		sertad3.L		LOC108712674				eea1.S
usp8.S		tpt1.L		LOC108706704				ddx3x.S
ctnna1.L		ccne2.S		Xelaev18028211m				plekhg4.L
thg1l.L		hnrnpa1		Xelaev18002860m				ing2.L
tnrc6a.L		cirbp.L		bix1.1.S				gid8.L
rlf.L		hnrnpk.L		otp.S				cmtm7.S
nfat5.L		rbmx.S		pitx3.L				araf.S
sgol1.L		zc3h10.L		adcyap1.S				slc25a25.S
gas6.L		cdknx.L		des.1.S				usp8.S
mthfr.L		rnf222.S		nodal3.1.L				ctnna1.L
peak1.L		hmgn1.S		otx2.L				thg1l.L
casp8ap2		znf91		rgs1.L				tnrc6a.L
spag5		ccne2.L		homeobox100496651-provi				rlf.L
mief2.S		socs3.L		LOC108705533				nfat5.L
elp2.S		pvrl2.L		kcnab3.S				tgif2.S
pkn3.S		tmem79.S		sebox.L				sgol1.L
irf2bpl.L		tra2a.S		osr1.S				gas6.L
ckap5.S		slc25a17.L		LOC108709611				mthfr.L
slc35e3.S		zbtb10.S		camta1.L				peak1.L
vsig10.L		rabgap1l.L		gata2.L				casp8ap2
pcgf3		tra2a.L		hoxd9.L				spag5
nab1.S		1700037h04rik		Xetrov90010614m.S				mief2.S
zfyve1.L		isg20l2.L		lrit2.S				elp2.S
wdr47.S		metrnl.S		val.L				pkn3.S
znf646.L		LOC108701852		Xelaev18010420m				irf2bpl.L
samd4b.L		eef1a1.L		osr2.L				ckap5.S
kdm2b.L		rbms2.S		LOC108702948				slc35e3.S
top1mt-like.L		zc3h10.S		osr1.L				vsig10.L
dab2ip.L		rnd1.S		chrna4.S				pcgf3
picalm.1.L		prickle1.L		mespa.L				nab1.S
polg.L		muc5b		mix1.S				zfyve1.L
tradd.L		celsr1		Xelaev18010896m				wdr47.S
otud4-like.2.L		coq10b.L		pcdh8.2.L				znf646.L
dnajb12.S		ventx2.1.S		osr2.S				samd4b.L
ppp1r9a.L		fhdc1.L		gata4.S				kdm2b.L
pcyox1l.L		chst7.S		mespb.L				top1mt-like.L
szrd1.L		sfpq.L		LOC108705749				dab2ip.L
vkorc1l1.L		rhebl1.S		pcdh8.2.S				picalm.1.L
unnamed.S		hdgf.L		xenf				polg.L
hells.S		atg16l1.S		nodal1.S				tradd.L
phf14.L		arl13b.L		bix2.L				otud4-like.2.L
sec24b.L		spry1.S		nodal1.L				dnajb12.S
tep1.L		slc2a1.S		cml				ppp1r9a.L
atp8b1.L		rasl11b.L		LOC108705994				pcyox1l.L
ext1.S		bmp7.2.L		nodal2.L				szrd1.L
LOC100127794.L		srsf2.L		krt16.S				vkorc1l1.L
klhdc10.L		tfap2a.L						unnamed.S
rala.L		rarg.S						hells.S
hprt1.L		eef1a1o.S						phf14.L
snx4.S		slc7a3.L						sec24b.L
spryd3.S		cldn4.L						tep1.L
filip1.L		kiaa0232.S						atp8b1.L
znf800.S		sapcd2						ext1.S
c16orf52.L		cdk9.L						LOC100127794.L
LOC108719340		Xelaev18032628m						klhdc10.L
ccnb2.L		atf4.L						rala.L
nup58.L		xbp1.L						hprt1.L
ccdc68.S		LOC108715172						snx4.S
adgrl2.L		acy3.L						spryd3.S
glce.S		btg1.L						filip1.L
got2.L		sf3b5.S						znf800.S
maml1.L		pou5f3.2.S						c16orf52.L
zbtb21.L		ptafr.L						LOC108719340
e2f4.L		g2e3.L						ccnb2.L
ankrd12.S		arl5c.L						nup58.L
zar2.L		brd2.S						ccdc68.S
exoc8.S		sowahc.L						adgrl2.L
gtf2a1.L		dlx5.S						glce.S
traip.L		sox2.L						got2.L
lbh.S		hnrnpr.L						maml1.L
frs2.S		LOC108698217						zbtb21.L
nup133.S		sgk1.S						e2f4.L
slc30a5.S		LOC108711622						ankrd12.S
pdik1l.L		plekhg3.L						zar2.L
nufip2.S		gfpt1.L						exoc8.S
ubn2		slc35a2.S						gtf2a1.L
ccnb1.2.S		LOC108709818						traip.L
srebf2.L		e2f7.S						lbh.S
pop4.L		LOC108701212						frs2.S
kpnb1.L		ventx2.2.L						nup133.S
ccdc117		fam122b.L						slc30a5.S
stk17a.L		slc25a29.L						pdik1l.L
dlg1		Xelaev18022211m						nufip2.S
dgkh		rbl1.L						ubn2
rictor		fsbp-like.L						ccnb1.2.S
tab3.L		LOC108719510						srebf2.L
nfkbil1.L		e2f7.L						pop4.L
rabgef1.L		skil.S						kpnb1.L
ap5b1.L		znf585b.S						ccdc117
arhgap21.S		wap						stk17a.L
ube2j2.S		pou5f3.2.L						dlg1
usp8.L		fam193a.L						dgkh
prr14.L		ets2.L						rictor
srprb.L		LOC108719569						tab3.L
fam193b.L		spry1.L						nfkbil1.L
usp44.L		rbl1.S						rabgef1.L
c3orf58.S		trim25						ap5b1.L
shroom4.L		irf8.S						arhgap21.S
smg8.S		tubb2b.L						ube2j2.S
tmx4.L		stox1.S						usp8.L
abhd17a.S		chd3						prr14.L
aff4.S		txnip.L						srprb.L
cdkn2aip.S		LOC108719518						fam193b.L
exosc6.L		socs3-like.1.L						usp44.L
snx30.L		alcam.L						c3orf58.S
spty2d1.L		muc2						shroom4.L
entpd4.L		socs3						smg8.S
dock4.L		LOC108698564						tmx4.L
mns1.L		hist2h2ab.S						abhd17a.S
ythdf3.S		foxh1.2.L						aff4.S
asap2.L		prdm15.S						cdkn2aip.S
nemp1.L		sp5l.L						exosc6.L
nol9.L		tead4.S						snx30.L
abhd13.L		tfcp2l1.L						spty2d1.L
haus6.S		junb.L						entpd4.L
eri2.L		rdh10.L						dock4.L
akap1.S		ficd.S						mns1.L
dars2.L		fam110c.L						ythdf3.S
exd2.L		pvrl1-like.2.L						asap2.L
cyth1.S		xbp1.S						nemp1.L
nup133.L		cldn5.S						nol9.L
qrich1.1.L		rbms2.L						abhd13.L
fdx1l.S		sgk1.L						haus6.S
kiaa1210.L		crebzf.S						eri2.L
slc12a6.S		LOC108707041						akap1.S
cdc45.L		admp2.L						dars2.L
rell1.S		gprc5c.L						exd2.L
ccdc107		npdc1.1.S						cyth1.S
pou5f3.3.L		srsf7.L						nup133.L
chfr.L		Xelaev18030357m						qrich1.1.L
acvr1b.S		gnb3.L						fdx1l.S
sik2.S		litaf.L						kiaa1210.L
tle1		fgfr2.L						slc12a6.S
bcdin3d.L		notch1.L						cdc45.L
dtx2.L		ccdc181.S						rell1.S
prkch.L		ttbk1.S						ccdc107
anapc7.L		LOC108706589						pou5f3.3.L
usp46.L		zswim4.L						chfr.L
emc8.S		LOC108702579						acvr1b.S
abhd13.S		pgbd4						sik2.S
cchcr1.L		LOC108719494						tle1
xpo4.L		LOC108696874						bcdin3d.L
slc35d1.L		Xelaev18008577m						dtx2.L
itgb1.L		LOC108709393						prkch.L
atad5.L		LOC108701134						anapc7.L
acsl4.L		junb.S						usp46.L
arfgap1.S		arl4c.L						emc8.S
csk.S		akap12.L						abhd13.S
net1.L		pdgfb.L						cchcr1.L
arhgef11.L		hsp70.L						xpo4.L
capn5.L		LOC108698137						slc35d1.L
znf462.L		LOC108715416						itgb1.L
ythdf3.L		jag1.L						atad5.L
ide.S		akap2.L						acsl4.L
ctdsp2.L		LOC100036828						arfgap1.S
ppp1r37.L		LOC108698488						csk.S
man2a2.L		slc7a5.S						net1.L
mapk7.L		nfkbiz						arhgef11.L
samd4a.L		rassf7.L						capn5.L
tmem198.L		LOC108706318						znf462.L
hspa5.S		mplkip						ythdf3.L
ppp2r1a.L		stx19.S						ide.S
acvr2b.S		LOC108698884						ctdsp2.L
med26.L		LOC108714507						ppp1r37.L
kif2c.L		Xelaev18039183m						man2a2.L
h1foo.S		Xelaev18000483m						mapk7.L
e2f4.S		rbm47.S						samd4a.L
ankle2.L		LOC108715921						tmem198.L
homez.L		rnf135.L						hspa5.S
nap1l1.S		cfap52.L						ppp2r1a.L
MGC53795		LOC100489887.L						acvr2b.S
odc1.S		ventx2.1.L						med26.L
slc25a5.L		xicl						kif2c.L
blzf1.S		grhl3.S						h1foo.S
rbm14.S		LOC108717642						e2f4.S
ncbp3.L		tmpo						ankle2.L
znf326.S		sdc4.L						homez.L
ddx5.L		tsc22d3.L
h3f3b.S		dusp5.S
ncl.S		dlc1.L
oaz1.S		grhl3.L
srsf9.L		Xelaev18024458m
sec23b.S		LOC108696061
carnmt1		Xelaev18001443m
c20orf24.L		tmem127.S
snrnp70.L		LOC108696887
hnrnpul2.L		pcdh7.L
eif2s2.L		pdk4.S
ilf2.L		hpgd.L
cd63.L		Xetrov90029963m.L
tra2b.L		Xetrov90005150m.S
txnl4a.S		hap1.L
nucks1.S		has1.S
bsg.S		hes4.L
serf2		LOC108707322
ctbp2.S		nudt22.L
snu13.S		LOC108695501
anp32e.L		LOC108705281
sarnp.S		LOC108702825
epcam.S		LOC108719547
prcp.S		emp2.L
sec61a1.L		nedd9.S
glul.S		cldn6.S
tpm3.L		stx19.L
hnrnpab.S		Xelaev18000217m
anxa7.L		LOC108711538
crkl.L		Xelaev18037842m
cdh3.L		wee2a
srsf3		slc16a12.S
hnrnpc.L		zfp36l2.S
snrpb2.L		LOC108702848
xnf7.L		Xelaev18023727m
snrpb.L		prdm1.L
alyref.L		zmcm3.L
tmed5.S		fam43a.S
hist2h3d.L		Xelaev18025314m
cgn.L		LOC108695546
pcbp3.L		hist1h1t
dnajc7.S		sall1.L
cldn7.L		smad4.1.L
hnrnpu		zswim5
set.S		LOC105945479
myl12b.S		zswim5.S
cldn6.2.L		fhl3.L
plrg1.S		elf1.L
gtpbp4.L		fam109b.L
ywhab.L		Xelaev18017221m
cox5b.1.L		atg16l1.L
srsf6.S		LOC108702448
ctf1		nedd9.L
hnrnpdl.S		znf451
pcf11.S		ptgs2.L
LOC108701478		ccng1.L
gnl3.L		Xelaev18001896m
snu13.L		gprc5cl1.L
prcc.L		rhbdl3
hdlbp.L		LOC108704627
ubtf.L		proser1.S
h2afz.S		eif4a2.L
myef2.S		Xelaev18021693m
ybx1.S		caprin2.S
mex3b.L		nxpe3l.6.L
krt18.L		loc108715171.S
arf4.S		ptgs2.S
sec61g.L		pkn1.L
luc7l3.L		yrdc
nedd8.S		entpd2.S
magoh.L		aplnr.S
epcam.L		gfod1
h2afz.L		gas2l1.S
rtn4.L		fth1.S
u2af1.S		rab26.L
plpp2.L		nynrin
ets2.S		MGC53707
fus.L		crocc.L
srsf1.S		rnd1.L
loc728026.L		gpx2.S
frmd4b.L		tuba1cl.2.S
iscu.S		dennd2c.L
ephb3.L		top2b.S
galnt7.S		apln.L
ptbp1.S		fosl2.L
hs3st1.L		cnn1.L
ssbp3.L		upk2.S
fam32a.L		kirrel2.L
itgb1.S		efna4.L
tceb2.L		Xelaev18003910m
marcksl1.L		Xelaev18003021m
srrt.L		mfap2.S
lrwd1.L		bcl3.L
srsf2.S		prrt4
vezf1.S		cnn1.S
hnrnpl.L		mxi1.L
hnrnpa0.S		nhs.L
sfpq.S		usp43
mex3c.L		sh3bp4.L
hnrnpa0.L		Xelaev18022168m
ubald2-b		xetrov90011961m.S
calr.L		gs17.L
capzb.L		fam83b.S
MGC81970		tiparp.S
fbxo34.L		fosl1.L
ptbp1.L		Xelaev18044839m
b3gnt2.S		itpka
commd3.S		LOC108698374
chrac1.S		LOC108695521
rab40c.L		wnt11b.L
marcksl1.S		LOC108711244
dnph1		socs2.L
pofut2		creb3l4.S
LOC108703769		stard13.S
elob		trpm4
cdc14b.L		ca14.L
imp4.S		lpar2.S
ccnf.L		LOC108695506
lpar4.L		krt5.7.L
nuak2.S		Xelaev18005946m
rbm14.L		sh2d3c.L
tmcc1.L		LOC108698352
tuba4b.L		loc108703073.S
cxcr4.S		st6galnac2.S
csrnp1.L		smad7.L
prickle1.S		trpv6
best2.L		p2ry2.L
znf653.L		upk3b.L
LOC108705724		emp2.S
plk3.S		syt10
cidea.L		efemp2.L
ptmap12.S		pcdha13.L
ier5.L		sall1
rhpn2.L		Xelaev18037271m
klf10.S		mars2
stox1.L		Xelaev18035393m
acvr1b.L		LOC100158389
lpar6.L		LOC108704223
ier5l.S		top2b.L
awat1.L		LOC108699904
ier2.L		krt5.7.S
trim7.S		cdk5r1.L
loc100495271.S		LOC108712218
spry2.S		Xelaev18013483m
rbm12.L		lgals3.S
Xelaev18024228m		Xelaev18005310m
Xetrov90004873m.L		LOC108698487
fzd6.S		Xelaev18002446m
ctc1		cyb561.L
gadd45g.L		kirrel2.S
farp2.S		Xelaev18014049m
tsc1.S		LOC100491629.L
arntl2.S		Xelaev18014048m
grpel2.L		LOC108714321
mex3b.S		traf4.S
dusp5.L		dlx3.L
etaa1.S		nxpe3l.2.L
plxna4		lrrc75b
ubald2.L		LOC108698461
aagab.L		hs3st3a1.L
gpaa1.L		itpr3
gadd45a.L		LOC108714970
c1orf198		has-rs.S
Xelaev18003796m		ckap4.S
LOC108718254		LOC108704510
lratd1		LOC108719506
not.L		LOC108707237
rap2b.L		Xelaev18022009m
ggt1.L		pcdh7.S
Xetrov90024734m.S		glis2.L
muc22		LOC105945479.S
angpt4.S		lrrc56.L
tmcc1.S		LOC108719533
shox2.S		LOC108711414
LOC108716071		hunk.S
Xelaev18001472m		msx1.S
grem1.L		sh2d3c.S
phospho1.S		gatm.L
plcl2		cdk5r1.S
stx8.L		LOC108695513
aim1.S		lin28a.S
robo3.S		cerk
foxi4.2.S		doc2a.S
akap12.S		lhx3.S
Xelaev18038858m		lct.1.L
dsel.S		adam9
loc108648340.L		LOC108709654
LOC494849		Xelaev18038498m
prkx.L		tbkbp1.L
msx1.L		hunk.L
LOC108718648		LOC108709649
MGC76328.S		pou5f3.1.S
t2.S		fgfr2.S
Xelaev18012750m		alcam.S
parp2.L		vegt.S
kif5c.S		ror2.L
c2cd2.S		loc100496061.L
pmm2.L		kiaa1324l.S
hes7.2.L		fzd2
lrig3.L		Xelaev18003895m
golm1.L		LOC108699475
Xelaev18030476m		casp7
LOC108704231		LOC100490918.L
lzts1.S		LOC108711841
nxpe4.S		a2m.S
ptpro.L		LOC108698113
rap2b.S		Xelaev18003957m
LOC100495010.S		itprip.L
rasl11b.S		klhl23.L
LOC108701311		Xelaev18008693m
fam110c.S		Xelaev18000325m
kcnq1		ist1
fam171a2.L		cyp26b1.L
tmem178b		lin28a.L
LOC108704394		LOC108695556
rarg.L		LOC108696832
sp5l.S		akap2.S
fam84b.S		acod1l.L
ifnlr1		znf268.L
LOC108700571		loc100494211.S
dlx2.S		wnt5b.S
slc39a8.L		cyp27a1
mgst2.L		irg1.L
st3gal5.S		gli1.L
tacc2.L		LOC108705899
tfap2e.S		LOC108700779
cfap58		plekhg2.S
cxcr4.L		dlx3.S
LOC108710651		smad7.S
ubp1.S		cd99l2.L
Xelaev18003995m		LOC108701721
steap3.L		LOC100489607.1
rasgrf1		rbbp8nl.L
spred1.L		Xelaev18029353m
zeb2.L		apcdd1.S
LOC108718647		il10rb.L
Xelaev18041871m		Xelaev18009885m
Xelaev18029885m		shbg
ces5a		epha4.L
vgll4l.S		LOC108703380
adam33.L		LOC108714958
slit1.S		cd274.L
itih3		LOC108717895
LOC108717663		acod1
spdef.S		phldb3.S
wee1.S		fam83c.L
hamp		cxcl11.L
relt.L		chrd
not.S		LOC108717924
btg-x		LOC108717350
six3.S		pou5f3.1.L
spns2.L		dll1.S
numbl.L		wnt5b.L
fat4.L		cacng4.L
ankrd24.L		LOC108702643
LOC108711796		cish.S
rnf152.L		Xelaev18003954m
phox2a		tnfsf10l.L
lrriq3.S		usp43.L
LOC108719541		tph1.S
szl		cxcl10.L
hap1.S		cdh1.S
Xelaev18002683m		cdon.L
Xelaev18040913m		itga6.L
xkr4.L		clca3.L
pcdh8.L		LOC108704568
col4a1.L		Xelaev18035319m
Xelaev18041870m		slc7a8.S
fgd1.S		zeb2.S
ndufb4.L		ltbr
xlmo1		znf608
cux2.L		c22orf15.L
LOC108697833		LOC108712667
LOC108700036		tril.L
twist1.L		sp6.L
sema4a.S		c3ar1.L
LOC108706492		arg1.L
lrig3.S		plekhn1.L
cacnb2.L		LOC108704127
hhip.L		tbc1d24.2.S
prph.S		gpr65.L
LOC108716562		mid1ip1.L
mafb.S		neurl1b.L
sp8.S		itprip.S
sox17a.S		xk81a1.L
star.L		LOC108703375
glis2.S		LOC108701422
arhgef40.S		Xelaev18029244m
rgmb.S		LOC100489157-like.S
MGC52759		gs17.S
LOC108712894		alpl.L
pdgfra.L		st6galnac2.L
Xelaev18006325m		plekhg5.S
Xelaev18018970m		Xelaev18038470m
Xelaev18037313m		LOC108715368
kiaa2012		Xelaev18045196m
LOC108702458		lypd2.L
dgki		sema3f.L
LOC108701725		Xelaev18035105m
Xelaev18003215m		lpar2.L
efs.S		sox7.S
MGC154351		MGC76328.L
Xelaev18024628m		col4a6.L
Xelaev18044351m		atp12a
gabarapl1-b		fam212a.S
plk3.L		anpep.S
LOC108697415		c17orf58.L
lrrtm3.S		cnr2.S
adra2c.L		lhx3.L
dram1		Xelaev18014773m
slc30a8.L		foxj1.L
vegt.L		ahnak.S
gata6.L		atp1a3.L
sel1l3.L		phldb3.L
pdp2.L		atp1b2
LOC108698246		lrrn1.L
Xelaev18036449m		hamp2.L
Xelaev18009887m		ervfrd-1
crx.L		akna.S
tdgf1.2.S		Xelaev18042923m
hhip.S		Xelaev18026940m
LOC100037118		pygm.S
nrp2.S		nxpe2p1
Xelaev18004736m		sox8.L
aacs.L		mig30.L
mertk.L		LOC108709430
scube2.S		aplnr.L
zbtb18.S		cdx2.L
zswim4.S		sox18.S
LOC108696704		prss36.L
nfkbia.S		arhgef19.L
fam149a		meis3.L
LOC108716731		nradd.L
nek6		LOC108715348
Xelaev18009848m		krt12.S
Xelaev18040914m		kctd15.L
tfr2.L		Xelaev18037263m
gata5.S		kitlg.L
Xelaev18005132m		elovl3.L
Xelaev18002937m		cxorf21.S
dll1.L		Xelaev18001991m
LOC108704612		Xelaev18005943m
muc5ac		efnb2.S
nuak1		col4a5.L
Xelaev18042001m		trim29.L
Xelaev18013398m		trpm5.L
ccdc141.L		mst1.L
arhgap39		kiaa1324.S
pmp22.S		pou6f1.L
dtx4.L		mmp14.L
prkcd		capn8.S
fzd8.S		lsp1.S
Xelaev18021795m		efnb2.L
lsp1.L		fam26e.S
myb.S		foxi1.S
fbn2		fgd1.L
fbn1.S		LOC108715654
LOC108711791		Xelaev18038471m
LOC108713742		hes7.2.S
gata4.L		has2.L
LOC108717200		szl.L
fam3d.S		elavl3.L
LOC108713650		f3.S
LOC108695812		fam212a.L
Xelaev18040771m		Xelaev18017809m
htra1.L		lefty.S
sst.S		Xetrov90026452m.S
nr5a2.L		kiaa1324l.L
gja4.L		Xelaev18043700m
noxo1		Xelaev18001971m
creb3l4.L		gsc.S
LOC108700767		ngfr.S
LOC108710968		LOC108696320
hoxc12.S		foxj1.S
Xetrov90018634m.L		MGC80993
LOC108696040		fgf8.S
Xelaev18039988m		lefty.L
tbc1d5		Xelaev18026939m
trarg1.L		loc100497729.L
LOC108718316		dhx58.L
sox17b.2.L		kcnj15.L
nectin1l2.2.S		flrt3.L
prelid3a.L		Xetrov90015528m.L
six2.S		chrna2.L
LOC108706543		fgf8.L
LOC108706156		pdgfa.L
Xetrov90029923m.S		LOC108716397
Xelaev18000237m		unc93a.L
chrna4.L		eomes.S
p2ry11.S		nodal.L
LOC108697967		c3.L
LOC108713819		clcf1.L
LOC108718886		Xelaev18001619m
mnx1.L		slc38a2.L
lhx1.S		rgs2.L
bix1.1.L		tmprss9.S
snai2.L		1a11.L
cfb.L		npy2r-like.1.L
slc2a1.L		cass4.S
snai1.S		LOC108719085
fam131b.S		LOC108705022
Xetrov90018471m.L		bix1.2.L
hoxc12.L		MGC79993
trpc6.L		wnt7a
wnt11.L		bix1.3.S
f2rl2.L		eomes.L
dhcr7.L		loc495835.L
neurod2.L		chgb.L
tfap2b.S		gata2.S
LOC108706202		nptx2.S
Xelaev18027229m		chrd.L
rnf112.S		LOC108719420
Xelaev18017453m		afap1l2.L
Xelaev18002673m		flrt3.S
hhex.S		cass4.L
LOC101733813.1		bix1.3.L
mrc1		LOC100492708
Xelaev18012936m		mixer.L
tsc22d4		mespa.S
arhgef3.2.S		foxa4.S
Xelaev18006002m		mixer.S
LOC108702593
niban2
Xelaev18004563m
ca14.S
prkab2.S
ifit5
slitrk5.S
dnase1l3
ednra.S
eps8l2.S
hcar3.L
cbln2.S
Xelaev18005944m
pigz.L
prickle3
itga4.S
fzd8.L
dusp10.2.S
edn2.S
xdh.S
tuft1.L
LOC108708505
LOC108704569
sstr1.L
LOC108720014
LOC108712221
Xelaev18009605m
fli1b.L
dnhd1
muc3b
LOC108703547
vps37d.S
catip.L
fgf20.S
hoxd9.S
LOC108703460
sox17b.1.S
sox17a.L
map3k14.S
bmp7.1.L
styk1.S
gli3.L
npbwr2
il16.L
pou3f1.L
LOC108704529
cacnb1.S
LOC108708391
xhoxc8
plekhg5.L
gata6.S
LOC108705130
relt.S
foxa1.S
pou3f1.S
LOC108698417
pycard.S
LOC108699675
agr2.S
tbx6
Xelaev18035970m
LOC108711628
htr5a.L
adm.L
Xelaev18002950m
chrd.2.L
sox18.L
klb.S
LOC100495222.1.L
areg.S
en1.L
colca2.L
Xelaev18042237m
krt15
LOC108717617
LOC108709763
Xelaev18032449m
nr5a2.S
vgll3.L
Xelaev18016829m
pkdcc.2.S
LOC108700092
mx1
cd80.L
stx1b.L
ccndx.S
hoxc9.S
tril.S
Xelaev18008846m
fgf20.L
Xelaev18006376m
LOC108717287
Xetrov90023614m.L
myoc.L
mab21l3.S
kcna2.S
gdf3.S
faim2.S
snai1.L
gucy1b2
Xelaev18042907m
nodal3.2.L
LOC100495966
sncb.L
noxa1.L
map3k19.L
Xelaev18003943m
LOC108701312
zscan5a
antxr2.S
LOC108702204
lzts1.L
htra3.S
rasip1.L
st6gal1.L
slitrk1.S
Xelaev18011386m
Xelaev18047274m
LOC108708636
krt222
LOC108713700
pycard.L
LOC108705132
Xelaev18034666m
pnck.L
hoxd10.S
LOC108705770
sftpb.S
pex5l.S
nrip3.L
LOC108707804
Xelaev18002252m
kctd12.L
fam167a.S
Xelaev18045520m
prr5l.L
LOC108713121
lgi4.L
slitrk3.S
hoxd10.L
mix1.L
LOC108715719
hhex.L
Xelaev18018965m
fgd1
mgst2
gpr45.S
foxj2-b
hmx3.L
mesp2.S
sox12.L
nkx2-5.L
pear1.L
ccl20.L
wnt16.L
pax1
Xelaev18036955m
rem1.L
slc9a4.L
gas2l2.S
rom1.S
ngef.S
Xelaev18032910m
LOC108710750
LOC101732299.L
mesp2.L
Xelaev18000681m
Xelaev18019163m
pax3.L
Xelaev18013481m
LOC108697063
vstm2b.L
Xelaev18001114m
pex13
vsx2.S
ralyl.S
spib.S
hoxc10
muc1.S
ntn3.L
lef1.L
bmper.L
scn2b.L
cep19.L
LOC495206
Xelaev18011064m
ifnl3
nodal.S
shh.S
pnpla7.L
nr2f1.L
igfbp4.L
slc16a5-like.S
c1ql1
Xelaev18033293m
znf410
mfsd2a.L
pitx2.S
LOC108716865
Xetrov90024317m.L
LOC108718080
spns2.S
chst3.L
LOC108716734
emx2.L
Xelaev18003951m
MGC82209
pcdh8l.S
rorb.L
lhx1.L
LOC108704130
amigo2
fbn2.S
klhdc8a.S
LOC108697572
Xetrov90015502m.L
LOC108714665
gsc.L
Xelaev18026287m
npas2.L
LOC108718887
LOC108710786
LOC108699131
hoxb3.L
rerg.L
hao1.L
ppp1r16b.S
Xelaev18000337m
foxa4.L
hoxc8.S
barhl1.L
Xelaev18034023m
wnt5a.L
LOC108717435
onecut2.S
LOC108715896
sia1.L
glipr2.S
Xelaev18032521m
LOC108719251
pth1r.L
pdgfra.S
trpm8b.L
hsd17b6
Xelaev18021016m
Xelaev18028212m
slc2a6.L
or10a7
LOC108705598
LOC108699856
Xetrov90015502m.S
menf.1.L
Xelaev18024303m
pkdcc.2.L
mespb.S
Xelaev18031473m
prdm12.L
hoxc13.S
cbm101731809provisional
fgf3.S
LOC108712674
LOC108706704
Xelaev18028211m
Xelaev18002860m
bix1.1.S
otp.S
pitx3.L
adcyap1.S
des.1.S
nodal3.1.L
otx2.L
rgs1.L
homeobox100496651-provi
LOC108705533
kcnab3.S
sebox.L
osr1.S
LOC108709611
camta1.L
gata2.L
hoxd9.L
Xetrov90010614m.S
lrit2.S
val.L
Xelaev18010420m
osr2.L
LOC108702948
osr1.L
chrna4.S
mespa.L
mix1.S
Xelaev18010896m
pcdh8.2.L
osr2.S
gata4.S
mespb.L
LOC108705749
pcdh8.2.S
xenf
nodal1.S
bix2.L
nodal1.L
cml
LOC108705994
nodal2.L
krt16.S

## Sheet: St10-10.5
List of all genes from the venn diagrams of genes temporally differentially expressed in endoderm and mesoderm lineages corresponding with figure 5B
Total				Increase				Decrease
Endo Only	Meso Only	Overlap		Endo Only	Meso Only	Overlap		Endo Only	Meso Only	Overlap
frzb-1	haus3.L	ventx1.2.L		frzb-1	ccdc129.L	ventx1.2.L		lman2.S	haus3.L	bcar3.L
cer1	sec62.S	chst1.S		cer1	lamb1.L	chst1.S		lonrf2.L	sec62.S	tubgcp3.S
foxa2.L	csnk1g3.L	pkdcc.1.L		foxa2.L	trpv5.L	pkdcc.1.L		isca1.L	csnk1g3.L	adnp.L
cer1.S	adarb1.L	mig30.L		cer1.S	gjc2.L	mig30.L		fnbp1l	adarb1.L	gcc1.S
rgs16.S	LOC108703835	slc6a8.S		rgs16.S	cdx2.L	slc6a8.S		dusp11.S	LOC108703835	nploc4.S
ckmt1b.S	b4gat1.L	gata3.S		ckmt1b.S	slc26a9.S	gata3.S		chaf1a.S	b4gat1.L	ppip5k2.L
darmin.L	LOC108699095	zic3.L		darmin.L	figf.L	st3gal1.L		gpat4.L	LOC108699095	spty2d1.S
lrrn3.L	lipe.L	st3gal1.L		lrrn3.L	MGC147600.S	moxd1.S		ykt6.L	lipe.L	znf684.S
Xelaev18043356m	pign.S	moxd1.S		Xelaev18043356m	clcnkb	bmp7.1.L		zfand6.L	pign.S	rpgr.S
LOC108712937	telo2.L	bmp7.1.L		LOC108712937	sh3d21.L	Xelaev18002117m		naa15.S	telo2.L	gpr157.L
LOC108705045	trpm7.L	Xelaev18002117m		LOC108705045	anxa4.S	LOC108717899		nol9.L	trpm7.L	znf782.S
slc5a8.L	mterf1.L	LOC108717899		slc5a8.L	c5.2.L	fer1l4		chfr.L	mterf1.L	kif23.L
frzb.S	flna	fer1l4		frzb.S	arhgap36.L	lef1.L		ppp2ca.S	flna	tubg1.S
spns2.L	snx1.L	lef1.L		spns2.L	kremen2.L	npnt.S		eml4.L	snx1.L	ccnl1
klrc4-klrk1	acadl.L	npnt.S		klrc4-klrk1	LOC108703849	mrc2.S		znf335.S	acadl.L	arhgap32.S
spns2.S	racgap1.S	mrc2.S		spns2.S	tll1-like.1.L	ank3		mastl.L	racgap1.S	ttc37.L
gata6.S	tdrp.L	ank3		gata6.S	cdx4.S	capn8.2.L		szrd1.S	tdrp.L	znf234.L
atp1b4	rad51d.L	capn8.2.L		atp1b4	comt.2.S	ednra.S		ipo9.L	rad51d.L	fam214a.L
spry4.L	parpbp.S	ednra.S		spry4.L	kremen2.S	fhl3.L		slc30a1.S	parpbp.S	exd2.L
LOC108709890	tmem104.S	fhl3.L		LOC108709890	ano9.L	scube2.L		mkrn3.L	tmem104.S	ubr5.L
bpi	igf2r.L	admp.S		bpi	ccn1l.S	col4a5.S		fgf8.L	igf2r.L	mcoln2.L
pkdcc.1.S	yaf2.L	scube2.L		pkdcc.1.S	crabp2.L	slc30a8.L		ptpra.S	yaf2.L	rfc1.L
ntrk1.L	mark4.L	col4a5.S		ntrk1.L	wfdc2.L	ror2.L		ncoa4.S	mark4.L	baiap2l1.L
adamts15.L	abca3.S	slc30a8.L		adamts15.L	krt12.S	il16.L		fam46c.S	abca3.S	arf6.S
LOC108707266	cry-dash.L	ror2.L		LOC108707266	myh6.S	sspo.L		cachd1.S	cry-dash.L	prickle4.S
slc16a7.L	timm23.L	il16.L		slc16a7.L	slc9a2	ahnak.S		ppp1r15b-like.S	timm23.L	clk2.S
runx1t1	ap2b1.L	sspo.L		runx1t1	egfl6.L	hes3.1.S		tle1.L	ap2b1.L	gpkow.L
tmem150b.S	tubgcp5	ahnak.S		tmem150b.S	elovl3.L	dennd2a.L		atad5.L	tubgcp5	smagp.S
ca7.L	cdc20.L	hes3.1.S		ca7.L	MGC80993	muc1.L		per3.S	cdc20.L	cdc6.S
hoxa9.L	Xelaev18031388m	dennd2a.L		hoxa9.L	elavl3	rnd1.L		nckipsd.S	Xelaev18031388m	ppp1r13b.L
crx.S	fitm2.L	muc1.L		crx.S	LOC100487224.L	st3gal1.S		grk6.S	fitm2.L	fcho2.L
vcan	uap1.S	rnd1.L		vcan	tmprss9.L	fam198a.L		c3orf58.S	uap1.S	haus6.S
thsd7a.L	prss16.L	st3gal1.S		thsd7a.L	slc25a4.L	chrna4.S		arpc4.S	prss16.L	mtmr10.L
LOC108715064	LOC108704532	fam198a.L		LOC108715064	LOC100496293.L	epas1.S		spag9	LOC108704532	batf3.S
tmprss2.14.S	pcdh1.S	chrna4.S		tmprss2.14.S	nr1i3.L	gatm.L		itpkc.L	pcdh1.S	lemd3.S
gata3.L	lrrfip2	epas1.S		gata3.L	LOC108720014	cdx1.S		vangl2.L	lrrfip2	exoc2.L
st6galnac4	gcnt3.S	gatm.L		st6galnac4	gli3.L	MGC83169		usp9x.L	gcnt3.S	dctn4.L
igf2.S	jak1.L	cdx1.S		igf2.S	col8a1.L	clca3.L		cdt1.L	jak1.L	mapk7.L
gpx3.S	creld1.L	MGC83169		gpx3.S	msx2.S	otog.L		nos1ap	creld1.L	wwp1.S
LOC108696302	kif24.L	clca3.L		LOC108696302	LOC108698170	capn8.S		kctd5.L	kif24.L	gtf2a1.L
dmbx1.S	lrrc28.L	otog.L		dmbx1.S	ventx3.2.S	cdon.L		cysrt1	lrrc28.L	ccnl1.L
Xelaev18043812m	adcy7.L	capn8.S		Xelaev18043812m	fermt1.S	hhip.L		fam26d.L	adcy7.L	znf33a.L
irx3.L	gtf2ird1.S	cdon.L		irx3.L	slco5a1.S	spred1.L		rapgef1.S	gtf2ird1.S	ankhd1.S
egr1.L	macc1.L	hhip.L		egr1.L	LOC108703841	LOC108715348		uba3.S	macc1.L	tmem104.L
ptger4.L	cct6a.L	spred1.L		ptger4.L	tmem265.S	ccnd1.L		sos2.L	cct6a.L	bmp2.S
bcl11b.L	nkd1.S	LOC108715348		bcl11b.L	gnb3.S	trabd2a		med14.L	nkd1.S	pigb.S
anxa6.L	trip11.L	ccnd1.L		anxa6.L	pkp3.S	lin28a.S		ahctf1.L	trip11.L	nckipsd.L
Xelaev18032309m	LOC108704267	trabd2a		Xelaev18032309m	Xetrov90002352m.L	efna1.S		smarcad1.S	LOC108704267	LOC108704268
Xelaev18039313m	cdk8	lin28a.S		Xelaev18039313m	degs3.L	gatm.S		dnajc14.S	irs2	baiap2l1.S
gata4.L	tmem255a.S	efna1.S		gata4.L	LOC108699767	map3k14.S		golga7.S	cdk8	lin9.S
fkbp7.L	plxnb2.S	gatm.S		fkbp7.L	dlx3.S	Xetrov90014299m.L		bnip3.L	tmem255a.S	lamtor3.S
gata6.L	sec62.L	map3k14.S		gata6.L	hsd11b1l.L	znf474.S		tlk1.L	plxnb2.S	chpt1.L
trpm4.L	ctif.L	Xetrov90014299m.L		trpm4.L	arid3a	cmtm8.L		ash1l	sec62.L	taf9b.L
otx2.S	tpcn1.L	znf474.S		otx2.S	tead4.L	prdm1.L		rad54l	ctif.L	tmem169.L
vcan.L	kmt2c.S	cmtm8.L		vcan.L	tll1.S	Xelaev18024458m		ppp2r5e.L	tpcn1.L	rce1.S
Xelaev18035430m	limch1.L	prdm1.L		Xelaev18035430m	plcd3.S	LOC108715896		dgkq.L	kmt2c.S	rab21.L
dnah6	pdzd8.S	Xelaev18024458m		dnah6	lrrn1.L	LOC108699553		znf821.S	limch1.L	luzp1.S
LOC108697541	ubr3.L	LOC108715896		LOC108697541	mdk.S	clcf1.L		foxm1.S	pdzd8.S	zufsp.S
st6gal2.S	fry.L	LOC108699553		st6gal2.S	ptk2b.S	LOC108719253		rcor2.L	ubr3.L	tasp1.S
fn3k.L	loc100158433.L	clcf1.L		fn3k.L	atp1b2.S	myo5b.L		ube2c.L	fry.L	adnp.S
MGC86526.S	zfhx2.S	LOC108719253		MGC86526.S	trpv6.L	xdh.S		maea.S	loc100158433.L	fam3c.L
trim50.S	c16orf46	myo5b.L		trim50.S	dlk2.S	hes3.1.L		grasp.S	zfhx2.S	atp2c1
LOC108705470	trappc2.S	xdh.S		LOC108705470	LOC100497556.L	a2m.S		hmgxb4.S	c16orf46	tdrp.S
LOC101027296	mier2.S	hes3.1.L		LOC101027296	LOC108709519	sema6a.S		bnipl.L	trappc2.S	katnb1.L
loc100494211.S	cidec.L	a2m.S		loc100494211.S	gprc5b.L	fgd1.S		abhd17a.L	mier2.S	stox2
ntn3.S	nfxl1.L	sema6a.S		ntn3.S	dlx6.L	cass4.S		sgol1.L	cidec.L	cebpg.L
LOC108703288	c16orf59.L	fgd1.S		LOC108703288	hpgd.S	tmem265.L		ube2k.L	nfxl1.L	svil.L
foxd4l1.1.S	dtna.S	cass4.S		foxd4l1.1.S	ecm1.S	lox.S		diaph3.L	c16orf59.L	mex3d.S
wnt8a.S	heatr5a.L	tmem265.L		wnt8a.S	rarg.L	c3.L		kdm3b.L	dtna.S	ficd.L
mig30.S	map4k3	lox.S		mig30.S	fa2h.L	atp8b3.L		phf3.L	heatr5a.L	dcp1a
Xelaev18034439m	sgms1.L	c3.L		Xelaev18034439m	smc2.S	id4.S		zfand6.S	map4k3	avpi1.S
ppp1r3e	mast2	atp8b3.L		ppp1r3e	wif1.L	notch1.L		plpp1.L	sgms1.L	rb1cc1.S
bmp7.1.S	nr1i2.S	id4.S		bmp7.1.S	trim29.S	cyp27a1.L		erf.L	mast2	loc733556.L
LOC108705469	ube3c.L	notch1.L		LOC108705469	nxpe2.L	scnn1a.S		znf618.S	nr1i2.S	agap1
synpo.L	fgfr1.L	cyp27a1.L		synpo.L	smad6.2.L	lsp1.S		lpgat1.S	ube3c.L	git2.L
Xelaev18023152m	dcun1d3.L	scnn1a.S		Xelaev18023152m	gnb3.L	kiaa0232.S		slbp.L	fgfr1.L	r3hdm1.S
crx.L	abo.3.L	lsp1.S		zic3.L	cfp	alpl.L		ninl.L	dcun1d3.L	rfwd2.S
LOC108698145	znf526.L	kiaa0232.S		crx.L	dlx5.L	fam193a.L		mtx2.L	abo.3.L	rcan3.L
gata4.S	LOC108695585	alpl.L		LOC108698145	myb.S	sulf1.L		osbpl8.L	znf526.L	atp9b.L
dleu7	c3orf17.L	fam193a.L		gata4.S	LOC108704223	Xelaev18022168m		letmd1.L	LOC108695585	vps13d.L
LOC108719432	chfr.S	sulf1.L		dleu7	trim68	c14orf37.L		ccdc28a.S	c3orf17.L	prrg1.L
gabbr1.L	dusp8.S	Xelaev18022168m		LOC108719432	crb2.L	atp1b2		eif6.L	chfr.S	atp13a4.S
Xelaev18016122m	LOC108695529	c14orf37.L		gabbr1.L	LOC108706875	scnn1a.L		psma7.S	dusp8.S	eri2.L
t.L	plxnb2.L	atp1b2		Xelaev18016122m	wasf3	pvrl1-like.2.L		raph1.L	LOC108695529	fut8.S
flnc	nme6.L	scnn1a.L		t.L	tnfsf10l.L	Xelaev18012294m		baz1b.L	plxnb2.L	tank.S
egr1.S	plekhm1.S	pvrl1-like.2.L		flnc	cfp.L	nfkbia.L		usp9x.S	nme6.L	pex10.L
Xelaev18034008m	spire2.L	Xelaev18012294m		egr1.S	c9.L	nxpe2p1		pik3c2a.S	plekhm1.S	arhgef7.S
kcnk6.S	fgfr1op2.L	nfkbia.L		Xelaev18034008m	rasal1.L	amotl2.S		wdr26.S	spire2.L	crem.L
Xelaev18002940m	tmem177.L	nxpe2p1		kcnk6.S	lsp1.L	LOC108708348		c4orf27.L	fgfr1op2.L	LOC108704248
LOC108696274	samd4a.S	amotl2.S		Xelaev18002940m	specc1l	Xelaev18000128m		rab23.S	tmem177.L	pdzd2.S
dmpk.L	myo10.2.L	LOC108708348		LOC108696274	kcnk1.S	vash2.S		cdc42se2-like.1.S	samd4a.S	top1.2.S
aim1l.L	surf1.L	Xelaev18000128m		dmpk.L	g0s2.L	pou5f3.1.L		nde1.S	myo10.2.L	tmtc3.L
Xelaev18035048m	tspan33.L	vash2.S		aim1l.L	fcn2	esr-5.L		znf574.S	surf1.L	b3gnt5.L
pnhd.L	cracr2b.L	pou5f3.1.L		Xelaev18035048m	clic3.L	LOC108713946		tuba4.L	tspan33.L	zfc3h1
LOC108708585	dclre1b.L	esr-5.L		pnhd.L	ap1m2.L	Xelaev18001656m		stk26	cracr2b.L	poc5.L
cthrc1.L	LOC108703842	LOC108713946		LOC108708585	LOC108716397	hspg2.L		cnot11.L	dclre1b.L	dars2.L
sox10.L	LOC108703744	Xelaev18001656m		cthrc1.L	slfn13.L	plxnb1.L		dcbld1.L	LOC108703842	eri1.L
t.S	syne2	hspg2.L		sox10.L	pvrl3.S	rreb1.S		zswim1.S	LOC108703744	psat1.L
cdh24.S	eif4e3.L	plxnb1.L		t.S	fam83c.S	LOC100490918.L		phactr4.S	syne2	ankle2.L
a2ml1	glo1	rreb1.S		cdh24.S	loc108718659.S	ervfrd-1		znf319.S	eif4e3.L	ypel1.S
LOC108711579	LOC108709941	LOC100490918.L		a2ml1	ablim1.S	LOC108703380		nfatc3.S	glo1	scap.L
Xelaev18030919m	tmem87a.L	ervfrd-1		LOC108711579	LOC100487499.S	scube2.S		LOC108700013	LOC108709941	gpi.L
carmil3	gpi.S	LOC108703380		Xelaev18030919m	amotl1.L	apeh.L		mthfd2.S	tmem87a.L	picalm.1.S
rgs20.L	scyl2.L	scube2.S		carmil3	lrig1.L	prom1.L		pard3.L	gpi.S	plxna3.S
sidt1.S	usp12.S	apeh.L		rgs20.L	kalrn.L	Xelaev18009838m		dlg3	scyl2.L	ate1.L
Xelaev18028207m	snx17.L	prom1.L		sidt1.S	irak2.L	lrp10.L		tmx4.L	usp12.S	gnai2.S
Xelaev18004081m	bdp1.S	Xelaev18009838m		Xelaev18028207m	nr1i3.S	lct.1.L		aaas.L	snx17.L	stx11.S
LOC108704696	ttbk2.L	lrp10.L		Xelaev18004081m	ifnlr1	mars2		gtpbp1.S	sgk223.L	ercc8.S
olig4.L	fgfr3	lct.1.L		LOC108704696	cenpv.L	LOC108710853		LOC108706563	bdp1.S	tprn
pitpnc1l.L	pot1.L	mars2		olig4.L	nxpe3l.6.L	LOC108696320		tnpo2.S	ttbk2.L	LOC108704624
LOC108711733	hbegf.S	LOC108710853		pitpnc1l.L	LOC108708225	shroom3.L		LOC108713924	fgfr3	rnf217.L
mnx1.S	LOC108714146	LOC108696320		LOC108711733	col4a5.L	rap2b.L		fam76b.L	pot1.L	pcyox1.L
foxd1.L	jmjd1c.L	shroom3.L		mnx1.S	Xelaev18013398m	LOC108713945		tgs1.L	hbegf.S	slc30a6.S
slc34a2.L	LOC108719399	rap2b.L		foxd1.L	mmp14.L	myt1.S		med30.L	LOC108714146	gatad2b
Xelaev18028209m	myc.S	LOC108713945		slc34a2.L	rab25.L	arhgef3.2.L		ccdc68.S	jmjd1c.L	rnf8.L
loc100490316.L	nin.L	myt1.S		Xelaev18028209m	fcgbp	eps8l2.S		cep57l1.L	LOC108719399	tnfsf11.S
mmp1.S	LOC108703819	arhgef3.2.L		loc100490316.L	Xelaev18024078m	arhgap39		pten.S	myc.S	kmt2c.L
cnrip1.L	Xelaev18045296m	eps8l2.S		mmp1.S	LOC108709568	pygm.S		myo9b.S	nin.L	mtmr2.L
asb9.L	lrp8.L	arhgap39		cnrip1.L	evpl.L	arhgap33.L		snx9.S	LOC108703819	tmem5.S
pnhd.S	cdc42ep2.L	pygm.S		asb9.L	xepsin.L	azin2.S		LOC108719340	Xelaev18045296m	arhgap32.L
ventx1.1.L	cdk5r2.L	arhgap33.L		pnhd.S	znf185.S	hal.1.L		poldip2.S	lrp8.L	rnf145.S
nrp2.S	abhd15.L	azin2.S		ventx1.1.L	MGC68910	arl8a.S		fbxo45.S	cdc42ep2.L	qrich1.1.S
LOC108700903	znf521.S	hal.1.L		nrp2.S	s1pr5.L	runx1.L		efcab14.S	cdk5r2.L	MGC83673
apcdd1.S	zbtb37.S	arl8a.S		LOC108700903	cyp1a1.L	LOC108717895		cachd1.L	abhd15.L	fam107b.S
sebox.L	cdc42se2-like.2.L	runx1.L		apcdd1.S	arhgef3.2.S	rpe65.S		alkbh5.S	znf521.S	cep126
foxe1.S	ttll11.L	LOC108717895		sebox.L	LOC108715890	LOC108708517		cdan1.L	zbtb37.S	snx13.S
cebpa.L	mgat4b.S	rpe65.S		foxe1.S	mid1ip1.S	chrna2.L		shprh.S	cdc42se2-like.2.L	cd276.S
Xelaev18039952m	hes1.L	LOC108708517		cebpa.L	atp12a	nynrin		clk1.L	ttll11.L	srgap2.S
chrd.2.L	rasal2.S	chrna2.L		Xelaev18039952m	prph.L	akap2.S		nvl.L	mgat4b.S	eea1.S
rnf223.L	grin2b.S	nynrin		chrd.2.L	alcam.S	LOC494849		snx30.L	hes1.L	vash1.L
pcdh8.2.S	depdc4.L	akap2.S		rnf223.L	plk2.L	fgfr2.L		nlk.S	zic3.L	borcs7.S
LOC108720035	fryl.L	LOC494849		pcdh8.2.S	elmo1.L	proser1.S		ppp2r1a.L	rasal2.S	usp32.S
pip5k1b.L	prorsd1p.L	fgfr2.L		LOC108720035	fsbp	top2b.L		gtdc1.S	grin2b.S	furin.L
LOC108715287	MGC115291	proser1.S		pip5k1b.L	ctsz.S	arl4c.S		pip5k1a	depdc4.L	pym1.S
litafd.S	pptc7	top2b.L		LOC108715287	xbp1.S	c22orf15.L		ivns1abp.S	fryl.L	bag5.S
rgs2.L	irf9.L	arl4c.S		litafd.S	myt1.L	pcbp2.S		mal2.S	prorsd1p.L	zbtb24.L
fli1.S	arrdc4.L	c22orf15.L		rgs2.L	tead4.S	ttc34.S		adpgk.L	MGC115291	cep85l
c10orf71	dand5.S	pcbp2.S		fli1.S	loc100497729.L	LOC108695521		slc12a6.S	pptc7	med4.S
cpz.L	LOC108714033	ttc34.S		c10orf71	prkx.L	znf608		fdx1l.L	irf9.L	LOC108707483
shox2	adamts8	LOC108695521		cpz.L	tuba1cl.2.S	plcd3.L		suv39h2.S	arrdc4.L	arap1
pdgfra.S	LOC108704531	znf608		shox2	muc5ac	plekhs1		chmp4c.S	dand5.S	blm.L
Xelaev18023478m	errfi1.S	plcd3.L		pdgfra.S	dgka.L	xk81a1.S		raver1.S	LOC108714033	ppp1r21.L
loc100494211.L	kctd18.S	plekhs1		Xelaev18023478m	loc108703073.S	zswim5		mrps25.S	hs6st1.L	ints14.S
Xelaev18015877m	znf362.S	xk81a1.S		loc100494211.L	LOC108716735	slc7a8.S		atg101.S	adamts8	cnot8.S
wfdc1.L	zic2.L	zswim5		admp.S	Xelaev18004347m	afap1l2.L		ptgfrn.S	LOC108704531	fryl.S
cux2.L	LOC108695586	slc7a8.S		Xelaev18015877m	znf282	MGC52622		efhd1.L	errfi1.S	dyrk3.S
dnase1l3	hlx	afap1l2.L		wfdc1.L	gli1.S	gfpt1.L		ctdspl.L	kctd18.S	pcgf2.L
ventx1.2.S	ern2.S	MGC52622		cux2.L	lmod1.S	zfp36.S		emc8.S	znf362.S	bptf.L
LOC108708252	tigd4	gfpt1.L		dnase1l3	creb3l4.S	sncb.L		dlg1	zic2.L	klhl7.S
arhgef28.S	LOC108699297	zfp36.S		ventx1.2.S	ptger4.S	LOC108713701		rabgef1.S	LOC108695586	ccdc126.S
mertk.L	LOC108719557	sncb.L		LOC108708252	stard10.L	lin28a.L		traf7.S	hlx	dnajc16.S
Xelaev18011486m	kctd14.S	LOC108713701		arhgef28.S	sds.L	LOC108701422		ccdc94.L	ern2.S	gatsl3.L
kctd7.L	trps1.S	lin28a.L		mertk.L	bspry.L	slc45a3.L		fam69a.S	tigd4	cdkl5.L
foxd4l1.1.L	ccdc102a.S	LOC108701422		Xelaev18011486m	zfp36.L	cyp27a1		slc35e1.L	LOC108699297	fbxl12.L
iqca1.S	angptl4.L	slc45a3.L		kctd7.L	LOC108715136	lgals3.S		cisd1.L	LOC108719557	socs5.L
snai2.S	znf484.L	cyp27a1		foxd4l1.1.L	LOC108695829	phldb3.L		kansl1	kctd14.S	abcb6.L
shank2.S	lpcat1.S	lgals3.S		iqca1.S	fmc1.L	rbl1.S		map4k4-like.S	trps1.S	nf1.S
scn2b.L	foxh1.S	phldb3.L		snai2.S	slc6a16.L	map3k1.S		mcm3ap.L	ccdc102a.S	znf436
LOC108698356	smim8	rbl1.S		shank2.S	htra1.S	Xelaev18003957m		hpcal1.L	dtx2.L	etnk1.S
emilin2	zic2.S	map3k1.S		scn2b.L	dennd2c.L	nradd.L		LOC108700255	angptl4.L	tdh.S
slc5a8	zfp36	Xelaev18003957m		LOC108698356	serpinh1.S	sox18.L		arfgap1.S	znf484.L	epb41l4b.S
cnksr1.S	pld2.L	nradd.L		emilin2	cpm.L	ccnb3.S		atg101.L	lpcat1.S	znf577.L
LOC398451	nubp1.S	sox18.L		slc5a8	fam212a.S	lrrc56.L		mybl2.S	foxh1.S	cry1.L
gramd1a.S	tgds.S	ccnb3.S		cnksr1.S	myc.L	nudt22.L		cited4.S	smim8	chd8.L
myh6.L	slc8b1.L	lrrc56.L		LOC398451	slc22a4.L	cerk		dhdds.L	zic2.S	fam189a1.S
dysf-like.L	LOC108696623	nudt22.L		gramd1a.S	prss8	mcl1.L		tle1	zfp36	asb6.S
adam33.L	usp20.L	cerk		myh6.L	rhebl1.L	zmcm3.L		kpna3.L	pld2.L	tada3.S
st3gal5.S	slc7a1.S	mcl1.L		dysf-like.L	slc2a2.L	hsp90aa1.1.L		trmt6.S	nubp1.S	b4galt5.L
LOC108700066	hivep1.L	zmcm3.L		adam33.L	creb3l2.L	rbl1.L		impad1.S	tgds.S	aebp2.S
crp	eda.S	hsp90aa1.1.L		st3gal5.S	tmem163.S	LOC108706543		asap2.L	slc8b1.L	ppp1r12a.S
LOC101732807.L	tmem184a.S	rbl1.L		LOC108700066	c2cd2.S	kcnk5		bnip3.S	LOC108696623	atp6v0a2.L
stx1b.L	nt5dc3.S	LOC108706543		crp	gprc5cl1.L	st6galnac2.S		ddx3x.S	usp20.L	MGC115510
sox9.S	bves.L	kcnk5		LOC101732807.L	bambi.L	LOC108705899		ccnyl1.L	slc7a1.S	vsig10.L
LOC108700085	fdft1.S	st6galnac2.S		stx1b.L	capns1.L	has-rs.S		tmem189.L	hivep1.L	ap5b1.L
naalad2.S	LOC108706483	LOC108705899		sox9.S	mboat1.L	itgb8.L		znf585a	eda.S	slain2.S
nptx1.L	LOC108719063	has-rs.S		LOC108700085	grhl3.L	tiparp.L		mcph1.S	tmem184a.S	LOC108699305
ndnf.L	socs3.L	itgb8.L		naalad2.S	vangl1.L	fgfr2.S		znf423.L	nt5dc3.S	ttc9.L
znf385c.S	mllt6.S	tiparp.L		nptx1.L	prickle2.L	caprin2.S		yae1d1.L	bves.L	stambp.L
LOC108715350	pxylp1.L	fgfr2.S		ndnf.L	LOC108710017	top2b.S		pgam5.L	fdft1.S	palb2.L
LOC108697754	fam53c.L	caprin2.S		znf385c.S	ccnb3.L	golm1.L		hspa5.S	LOC108706483	katnb1.S
onecut2.S	fgd6.S	top2b.S		LOC108715350	uts2r	LOC108704672		dazap2.S	LOC108719063	vps54.L
cdk15.L	tdgf1.1.L	chrd		LOC108697754	gas2l1.L	LOC108701168		smarca5	socs3.L	ccnyl1.S
mctp1	txnrd1.S	golm1.L		onecut2.S	fam198b.L	plekhn1.L		dgcr2.L	mllt6.S	znf268
gdf3.S	march2.S	LOC108704672		cdk15.L	adap1.L	LOC108715654		zcchc11.S	pxylp1.L	strbp.L
Xelaev18039582m	hdac2.L	LOC108701168		mctp1	gprc5c.L	trpm8b.L		uxs1.S	fam53c.L	senp1.L
kiaa1217.S	LOC108709062	plekhn1.L		gdf3.S	LOC108698063	LOC108698113		prkcsh.L	fgd6.S	rab8b.L
tbx3.L	atf6b.S	LOC108715654		Xelaev18039582m	ralgds.S	trarg1.L		cers3.L	tdgf1.1.L	kiaa1456.L
insm2.L	kcnn2	trpm8b.L		kiaa1217.S	znf750.S	trim67.S		pigc.L	txnrd1.S	slc15a4.S
mixer.S	zc3h12b.L	LOC108698113		tbx3.L	rhou	sds.S		usp47.S	march2.S	ptpn12.S
foxp2.S	foxb1.L	trarg1.L		insm2.L	pkn1.L	ablim1		ints5.L	hdac2.L	kiaa1191.L
shh.S	pygo1.L	trim67.S		mixer.S	fsbp-like.L	LOC108701721		insig2.L	LOC108709062	thap1
LOC108698222	socs3	sds.S		foxp2.S	ccdc68.L	Xelaev18038498m		rnf11.S	atf6b.S	myo19.S
kcnk6.L	fam57b.S	ablim1		shh.S	fam212a.L	trim29.L		clic1.S	kcnn2	cry4.L
wnt8a.L	Xelaev18017348m	LOC108701721		LOC108698222	krt.S	LOC108695513		rapgef6.S	zc3h12b.L	coq10a.L
kctd12.L	hes1.S	Xelaev18038498m		kcnk6.L	LOC108699910	smad4.1.L		ankrd12.S	foxb1.L	cry2.S
fbln1	foxd4l1.2.L	trim29.L		wnt8a.L	psmg3.L	itpka		atxn7.S	pygo1.L	usp22.S
Xelaev18026908m	gpr12	LOC108695513		kctd12.L	ag1.L	kiaa1614.L		plin2.S	socs3	usp46.L
admp.L	dmrt2.S	smad4.1.L		fbln1	LOC108696785	srsf7.L		gng10.L	fam57b.S	pwwp2b.L
LOC108697464	card19	itpka		Xelaev18026908m	Xelaev18043700m	zswim5.S		ano1.L	Xelaev18017348m	rgs12.L
lef1	foxb1.S	kiaa1614.L		admp.L	dlx5.S	fbxo5.L		ywhag.L	chrd	fam69a.L
otx2.L	ccdc129.L	srsf7.L		LOC108697464	sptbn4	sacs		ndor1.L	hes1.S	Xelaev18034523m
LOC108714284	lamb1.L	zswim5.S		lef1	post3.S	phldb3.S		setd1a.S	foxd4l1.2.L	slc35e2b.L
mrc2.L	trpv5.L	fbxo5.L		otx2.L	post5.S	rdh10.L		adgrl2.L	gpr12	kiaa2026.L
hoxc10.L	gjc2.L	sacs		LOC108714284	arg2.S	Xelaev18003895m		pkn2.S	dmrt2.S	mastl.S
afap1.S	cdx2.L	phldb3.S		mrc2.L	lsm4.L	LOC100127323		atp10d.L	card19	fbxl18.L
hdac9.S	slc26a9.S	rdh10.L		hoxc10.L	itga3.L	rai14.L		r3hdm1.L	foxb1.S	cited2.L
LOC100495222.1.L	figf.L	Xelaev18003895m		afap1.S	hspbp1.L	mypop.S		xylt2.L	admp.S	ubn2.S
rnf165.S	MGC147600.S	LOC100127323		hdac9.S	xicl	znf451		pxn.L		rfxap.S
LOC108701090	clcnkb	rai14.L		LOC100495222.1.L	rassf6.S	prss36.L		zdhhc20.L		scyl2.S
loc446281.L	sh3d21.L	mypop.S		rnf165.S	tfap2a.L	march8.L		immp1l.L		gnpat.S
Xelaev18038469m	anxa4.S	znf451		LOC108701090	nectin4	map3k19.L		ovca2.S		uvrag.L
ccn2	c5.2.L	prss36.L		loc446281.L	grhl3.S	id3.L		srebf2.S		prex1.L
Xelaev18020658m	arhgap36.L	march8.L		Xelaev18038469m	abcb1	akap2.L		rala.L		ptpn12.L
xenf	kremen2.L	map3k19.L		ccn2	b4galt5.S	ist1		habp4.S		dact1.S
a2ml1.L	LOC108703849	id3.L		Xelaev18020658m	esco2.S	elavl3.L		wdr24.L		fignl1.L
LOC100144987.S	tll1-like.1.L	akap2.L		xenf	nrarp	LOC108716734		ocrl.S		zbtb33.L
ptprr.L	cdx4.S	ist1		a2ml1.L	arhgef2.L	LOC108706318		fem1c.L		arid4b.S
LOC108705994	comt.2.S	elavl3.L		LOC100144987.S	klf10.L	emp2.S		etv6.L		znf507.L
itih3	kremen2.S	LOC108716734		ptprr.L	LOC108701134	sgk1.L		traip.L		lgalsl.S
tlx3.L	ano9.L	LOC108706318		LOC108705994	LOC108701666	krt5.7.L		arl9.L		e2f4.S
cfh.L	ccn1l.S	emp2.S		itih3	znf750.L	Xelaev18008693m		thumpd3.L		tbccd1.L
rgs1.L	crabp2.L	sgk1.L		tlx3.L	arhgef3.1.S	kirrel2.L		dag1.L		cep104.S
LOC108705531	wfdc2.L	krt5.7.L		cfh.L	hexim1.S	cnn1.L		morc2.L		cerk.S
LOC108696475	krt12.S	Xelaev18008693m		rgs1.L	cdk1.L	Xelaev18003954m		hspbap1.L		znf335.L
akap12.L	myh6.S	kirrel2.L		LOC108705531	arrdc3.S	id3.S		slc35f5.L		smtn.S
kcnh4.S	slc9a2	cnn1.L		LOC108696475	LOC108715416	pabpc4.L		znf292.L		prex1.S
pou4f1	egfl6.L	Xelaev18003954m		akap12.L	slc7a5.L	Xelaev18001991m		rab27b.L		ppp3cc.L
antxr2.S	elovl3.L	id3.S		kcnh4.S	march7.S	mab21l3.S		cenpi.L		usp44.L
rhcg.L	MGC80993	pabpc4.L		pou4f1	pygm.L	LOC108717200		jmjd1c.S		cog1.S
nrp2.L	elavl3	Xelaev18001991m		antxr2.S	fbp1.L	mst1.L		smad4.2.L		scarb2.S
Xelaev18011724m	LOC100487224.L	mab21l3.S		rhcg.L	ier5l.L	kitlg.L		abhd17a.S		dbf4b.L
hoxc9.L	tmprss9.L	LOC108717200		nrp2.L	mxi1.S	rap2b.S		samd4b.S		mphosph6.L
slc6a13.L	slc25a4.L	mst1.L		Xelaev18011724m	yeats4.L	rbms2.S		ctdnep1.L		pag1.S
rorc.S	LOC100496293.L	kitlg.L		hoxc9.L	bambi.S	LOC108715368		hyls1.S		pwwp2b.S
kcnj9.S	nr1i3.L	rap2b.S		slc6a13.L	pim1.L	fzd2.S		znf395.L		tmem51.S
gsc.L	LOC108720014	rbms2.S		rorc.S	LOC108703754	rbm45.L		cnot8.L		atrip.L
pdgfra.L	gli3.L	LOC108715368		kcnj9.S	post7p.L	Xelaev18017186m		blcap.S		rsf1.S
LOC108708812	col8a1.L	fzd2.S		gsc.L	upk1b.L	LOC108707322		snx1.S		vezt.L
Xelaev18005924m	msx2.S	rbm45.L		pdgfra.L	pdk4.L	pcdh19		mzt2b		LOC108716797
tnni3k.S	LOC108698170	Xelaev18017186m		LOC108708812	zfp36l1.S	nipal2.L		znf865.L		bbs2.S
fgf16.S	ventx3.2.S	LOC108707322		Xelaev18005924m	herpud1.S	mxi1.L		gpsm2.S		trpv4.L
pcdh8l.S	fermt1.S	pcdh19		tnni3k.S	rab11fip4l.L	traf4.S		senp1.S		rnf19b.S
hhex.L	slco5a1.S	nipal2.L		fgf16.S	nlrc4.L	mcm6.2.L		triobp.L		acot12.L
Xelaev18008648m	LOC108703841	mxi1.L		pcdh8l.S	post10.L	arhgef19.L		aamp.L		golph3l.S
osr1.L	tmem265.S	traf4.S		hhex.L	txnip.L	pcf11.S		vcpip1.S		cables1.L
eps8l2.L	gnb3.S	mcm6.2.L		Xelaev18008648m	dlx6.S	apoc1-like.L		zdhhc14		rnf219.L
igfbp2	pkp3.S	arhgef19.L		osr1.L	nrarp.S	robo3.S		c19orf44.L		LOC108704263
rap1gds1	Xetrov90002352m.L	pcf11.S		eps8l2.L	LOC108698396	foxi4.1.S		ttc4.L		rnf169.S
Xelaev18017910m	degs3.L	apoc1-like.L		igfbp2	rnf225	slc7a3.L		ccnh.L		pbx3
iqch.L	LOC108699767	robo3.S		rap1gds1	dedd2.L	znf268.L		hyal2.S		Xelaev18031390m
lmo1	dlx3.S	foxi4.1.S		Xelaev18017910m	dgkd-like.L	Xelaev18022009m		chd8.S		tcf20.S
fli1b.L	hsd11b1l.L	slc7a3.L		iqch.L	rps21.S	mplkip		tdgf1.3.L		jmy.L
efs.S	arid3a	znf268.L		lmo1	plekhg3	atf4.S		cep97.L		nemp1.L
fam92b.S	tead4.L	Xelaev18022009m		fli1b.L	cdknx.L	rassf7.L		tmem209.S		b3gnt7.S
sox17a.S	tll1.S	mplkip		efs.S	stx19.S	atp1b3.L		mov10l1.L		lhfpl2.S
Xelaev18016253m	plcd3.S	atf4.S		fam92b.S	slc35a2.S	sbno2.L		dnajb12.S		arhgef11.S
dkk2.L	lrrn1.L	rassf7.L		sox17a.S	znf653.L	LOC108700767		fmn2.L		papd5.S
slc38a4.L	mdk.S	atp1b3.L		Xelaev18016253m	rpl26.S	lrp10.S		ctdsp2.L		ints6.L
ehbp1l1.S	ptk2b.S	sbno2.L		dkk2.L	zfp36l1.L	zhx1.S		zbtb8a.1.S		sphk1.L
LOC108699863	atp1b2.S	LOC108700767		slc38a4.L	scaf4.L	rbm12.L		cep192.L		fbxo46.S
cspg5.L	trpv6.L	lrp10.S		ehbp1l1.S	cdc25b.L	hao2.L		ap1m2.S		mthfr.L
rem1.L	dlk2.S	zhx1.S		LOC108699863	ptch1.L	trpv6		hist1h2aa.L		ormdl1.S
ventx2.2.L	LOC100497556.L	rbm12.L		cspg5.L	tat.S	tmpo		spire2.S		vps13c.L
LOC108704183	LOC108709519	hao2.L		rem1.L	emg1.L	upk3b.L		fam222b.L		MGC85180
rasgef1b.L	gprc5b.L	trpv6		ventx2.2.L	stat3.2.L	napb		LOC108719552		orai2.S
camk1g	dlx6.L	tmpo		LOC108704183	tmem79.L	tubb4b.L		tnrc6b.S		tank.L
LOC108704653	hpgd.S	upk3b.L		rasgef1b.L	tspan13.L	znf740.L		stx2.L		taf4b.S
LOC108700087	ecm1.S	napb		camk1g	cks1b.L	eef1a1.L		fastkd3.L		kmt2b
efnb2.L	rarg.L	tubb4b.L		LOC108704653	trpv2.L	LOC108715137		tjp3.S		fchsd2
pkdcc.2.L	fa2h.L	znf740.L		LOC108700087	pars2.L	tuba3c.S		lrrk1.L		wdr60.S
LOC108707019	smc2.S	eef1a1.L		efnb2.L	plxnb1.S	sfpq.L		ammecr1l.S		zbtb37.L
Xelaev18012293m	wif1.L	LOC108715137		pkdcc.2.L	LOC108708564	gata2.S		med18.S		Xelaev18033527m
efs.L	trim29.S	tuba3c.S		LOC108707019	Xetrov90029311m.S	cfb.L		asl.L		stambp.S
tbx18.S	nxpe2.L	sfpq.L		Xelaev18012293m	ubb.L	pgbd4		rab8b.S		ranbp2.S
f2rl2.L	smad6.2.L	gata2.S		efs.L	aim1.S	hnrnpr.L		MGC97820.L		scai
LOC108706925	gnb3.L	cfb.L		tbx18.S	tcf7l1.S	fth1.S		kpna4.S		plekhg4.L
plekhg5.S	cfp	pgbd4		f2rl2.L	rbm47.L	celsr1		selenon.L		stc1.L
ntn3.L	dlx5.L	hnrnpr.L		LOC108706925	map2k6.L	arg1.L		LOC108719514		orai2.L
hhipl1l.L	myb.S	fth1.S		plekhg5.S	Xelaev18003558m	znf740.S		zswim9		brca2.L
lancl3.S	LOC108704223	celsr1		ntn3.L	ddx28.L	cdh1.S		samd4a.L		tnfsf11.L
mmp11.S	trim68	arg1.L		hhipl1l.L	rnf222.S	lrig2.L		setd1a.L		zbed6
LOC108698800	crb2.L	znf740.S		lancl3.S	ube2n.S	gpr143.L		rnf41.L		LOC108704241
ppp1r16b.S	LOC108706875	cdh1.S		mmp11.S	herpud1.L	pdgfa.L		tox4.S		nus1.S
map3k12.S	wasf3	lrig2.L		LOC108698800	xrcc1	slc7a5.S		cbll1.S		slc39a10
slc16a9.L	tnfsf10l.L	gpr143.L		ppp1r16b.S	rnf135.L	tmem127.S		cep295.S		ulk2.L
prss27	cfp.L	pdgfa.L		map3k12.S	tsc22d1.L	dlx3.L		grasp.L		atl2-like.S
cpe.L	c9.L	slc7a5.S		slc16a9.L	rarg.S	ckap4.S		fnbp1l.L		trit1.L
ccdc83.L	rasal1.L	tmem127.S		prss27	nadk2.S	khdc4		znf646.S		tbc1d2b.S
lrig3.L	lsp1.L	dlx3.L		cpe.L	gmps.L	brd2.S		mcm3.L		haus6.L
cnksr2	specc1l	ckap4.S		ccdc83.L	rpl37a.L	dhx58.L		taok3.S		paqr3.L
tbx2.S	kcnk1.S	khdc4		lrig3.L	b4galt3.L	fam83c.L		ptp4a1.S		jade3.S
LOC108704005	g0s2.L	brd2.S		cnksr2	LOC108700281	slc25a17.L		phf23.L		ect2.S
stx3.L	fcn2	dhx58.L		tbx2.S	awat1.L	fbxl20.S		fam193b.L		slc25a44.S
Xelaev18003524m	clic3.L	fam83c.L		LOC108704005	slc17a9.L	hdgf.L		hipk3.S		c5orf51.L
LOC108699675	ap1m2.L	slc25a17.L		stx3.L	slc7a4.L	klf10.S		zfyve27		zdhhc12.L
mixer.L	LOC108716397	fbxl20.S		Xelaev18003524m	midn.S	st6galnac2.L		LOC108705694		snx7.L
kiaa0895.L	slfn13.L	hdgf.L		LOC108699675	chd2.L	hnrnpa1.S		kat2b		efcab14.L
LOC108698354	pvrl3.S	irs2		mixer.L	hdac7.L	LOC108709581		fam110a.L		wdr7.S
rhpn2.L	fam83c.S	klf10.S		kiaa0895.L	cdca4.S	e2f7.L		LOC108703815		irs1.S
Xelaev18005585m	loc108718659.S	st6galnac2.L		LOC108698354	chst2.L	zfand5.L		rpa3.S		sec24b.L
LOC108714930	ablim1.S	hnrnpa1.S		rhpn2.L	rbm12b.L	melk.L		rnf130.S		rictor
tnni1.2.L	LOC100487499.S	LOC108709581		Xelaev18005585m	hsp70.L	slc25a29.L		LOC108712891		trim39.L
phox2a	amotl1.L	e2f7.L		LOC108714930	upk1a.L	cd99l2.L		stk24.S		csgalnact1.L
phox2a.S	lrig1.L	zfand5.L		tnni1.2.L	xpnpep1.L	hpgd.L		foxn2.S		smc5.S
numbl.L	kalrn.L	melk.L		phox2a	slx4.L	mlec.S		marveld3.L		klhl12.S
zswim4.S	irak2.L	slc25a29.L		phox2a.S	gpatch8.S	pou5f3.2.L		tctn2.L		ranbp2.L
adamts1.L	nr1i3.S	cd99l2.L		numbl.L	rpl36a.S	ppp1r8.L		homez.L		bach1.L
fgd1	ifnlr1	hpgd.L		zswim4.S	btbd10.S	sh2d3c.L		wdr47.S		mllt4.L
Xelaev18001956m	cenpv.L	mlec.S		adamts1.L	rpl34.S	ras-dva1.L		slc7a4.L		ptcd2.L
LOC108708347	nxpe3l.6.L	pou5f3.2.L		fgd1	selk.S	tmem79.S		fcho1.S		chpf.S
LOC108709611	LOC108708225	ppp1r8.L		Xelaev18001956m	rfx2.S	Xelaev18024066m		ifngr2		arhgef12.L
egr2.L	col4a5.L	sh2d3c.L		LOC108708347	nipal4.S	fblim1.L		zbtb41.L		tor1aip1-like.L
tbx20.L	Xelaev18013398m	ras-dva1.L		LOC108709611	LOC108709832	cdk9.L		edc3.S		cracr2b.S
scnn1gl.L	mmp14.L	tmem79.S		egr2.L	sox15.L	LOC108719518		ikbkg.L		pex12.S
f3.L	rab25.L	Xelaev18024066m		tbx20.L	chd3	LOC108704423		braf.L		gmnn.L
axl.S	fcgbp	fblim1.L		scnn1gl.L	rps27a.S	glipr2.S		cep350.L		marchf2
fgd1.L	Xelaev18024078m	cdk9.L		f3.L	leprotl1.L	rps2.L		twsg1.S		mbd4.L
dtx4.L	LOC108709568	LOC108719518		axl.S	rabgap1l.L	prpf39		dapl1.S		ky
snai2.L	evpl.L	LOC108704423		fgd1.L	cpt1a.L	loxl1.L		mrps16.L		akap13.S
itgax.L	xepsin.L	glipr2.S		dtx4.L	gm20188	gfpt1.S		snx27.S		znf639.S
slc2a1.L	znf185.S	rps2.L		snai2.L	grx5	rbms2.L		pphln1.L		ube2j2.S
LOC108701162	MGC68910	prpf39		itgax.L	rps7	ppp1r10.L		cpeb2-like.L		dapk1.L
tmem119.L	cyp1a1.L	loxl1.L		slc2a1.L	bola2.L	egln3.L		dcun1d5.L		saxo2.L
slc16a10.S	arhgef3.2.S	gfpt1.S		LOC108701162	dynll1.L	e2f3.L		exosc6.L		rapgef2.S
cdc42ep4.S	LOC108715890	rbms2.L		tmem119.L	il17rd.L	erbb3.L		ankrd12.L		ism1.L
f3.S	mid1ip1.S	ppp1r10.L		slc16a10.S	rps12.L	top2a.L		fam174b.S		usp15.S
lgr5.S	atp12a	egln3.L		cdc42ep4.S	unknown.S	LOC108696061		wdr81.L		dpp9.L
tmprss9.S	prph.L	e2f3.L		f3.S	rps9	actb.L		rab33b.S		klhdc10.L
mrc1	alcam.S	erbb3.L		lgr5.S	myl9.L	LOC100495010.S		cenpn.S		fam102b.L
Xelaev18033647m	plk2.L	top2a.L		tmprss9.S	rabgap1l.S	rbmx.S		mmaa.L		sept8.S
fzd7.S	elmo1.L	LOC108696061		mrc1	mknk2.S	e2f8.L		osbpl3.S		men1.L
nat8l.S	fsbp	actb.L		Xelaev18033647m	mkrn2.L	1700037h04rik		tmem110.S		ttc31.L
adamts10	ctsz.S	LOC100495010.S		fzd7.S	bcorl1.S	rhob.S		xpo4.L		zbtb6.S
kif26a.S	xbp1.S	rbmx.S		nat8l.S	oxr1.L	rbm5.L		znf391		Xelaev18032680m
ventx1.1.S	myt1.L	e2f8.L		adamts10	kiaa0101.L	xk81a1.L		slc30a2.L		cttnbp2nl.L
flt1.S	tead4.S	1700037h04rik		kif26a.S	uqcr11	zc3h10.L		LOC108703993		msantd3.S
tyr	loc100497729.L	rhob.S		ventx1.1.S	rps23.L	socs3-like.1.L		r3hcc1l.L		chp1.L
LOC108709398	prkx.L	rbm5.L		flt1.S	gas2l1.S	c1orf198		slc25a36.S		dip2b
myoc.L	tuba1cl.2.S	xk81a1.L		tyr	LOC108698339	LOC108715172		src.L		slc22a23.S
LOC108700025	muc5ac	zc3h10.L		LOC108709398	atp1b1.S	fgd4.S		atxn7l1.L		anapc13.1.L
zeb2.L	dgka.L	socs3-like.1.L		myoc.L	rpl38.S	krt5.7.S		smn2.S		MGC86530
jun.S	loc108703073.S	c1orf198		LOC108700025	rpl10.L	MGC80567		mbip.L		msantd3.L
arl4a.S	LOC108716735	LOC108715172		zeb2.L	esrp1.L	tubb2b.L		camkk1		agap1.L
myh7	Xelaev18004347m	fgd4.S		jun.S	eif4a1.L	fzd3.S		dcaf1.L		pkd2.L
LOC108698355	znf282	krt5.7.S		arl4a.S	ino80b.S	eif4a2.L		amotl1.S		smtn.L
Xelaev18042341m	gli1.S	MGC80567		myh7	dgat1.L	plekhg3.L		rassf3.L		ncoa3.S
myoc.S	lmod1.S	tubb2b.L		LOC108698355	taf12.S	eef1a1o.S		mef2d.S		uhrf1bp1l.L
LOC108700617	creb3l4.S	fzd3.S		Xelaev18042341m	nop16.L	ralb		styx.S		trerf1.S
efnb2.S	ptger4.S	eif4a2.L		myoc.S	rps13.S	fzd2		mns1.L		pak7.L
b4galt1	stard10.L	sgk223.L		LOC108700617	nop10	LOC108706094		wdr45.S		rab8a.S
cml	sds.L	plekhg3.L		efnb2.S	gprc5c.S	zmiz2.S		usp37.L		slc30a7.L
slc1a7.S	bspry.L	eef1a1o.S		b4galt1	slc35a2.L	post.L		ppp2r1a		unc119.L
rerg.L	zfp36.L	ralb		cml	LOC108701852	tra2a.L		ubap1.S		sertad2
cxcr4.S	LOC108715136	fzd2		slc1a7.S	rps25.S	sptan1.L		zmynd19.S		tbk1.S
dpysl4	LOC108695829	LOC108706094		rerg.L	kbtbd7.L	cenpc.L		spg11.L		ext1.S
rfk.S	fmc1.L	zmiz2.S		cxcr4.S	rpl36.S	midn.L		wasf3.L		siva1.L
zic5.S	slc6a16.L	post.L		dpysl4	pde3b	znf101		acvr1b.S		cep350.S
efna1.L	htra1.S	tra2a.L		rfk.S	elovl7.L	emp2.L		hipk3.L		atp8b1.L
txnrd1.L	dennd2c.L	sptan1.L		zic5.S	rpl28.S	cnn1.S		tspan15.L		btbd3.L
unc93a.L	serpinh1.S	cenpc.L		efna1.L	smim19.L	rps2		fam222b.S		spdl1.L
LOC100489887.L	cpm.L	midn.L		txnrd1.L	rpl18a.S	lrrc75b		csk.L		gse1.S
dkk1.L	fam212a.S	znf101		unc93a.L	MGC81028	lrwd1.L		mia3-like.1.L		ubap1.L
fgd5	myc.L	emp2.L		LOC100489887.L	eif1b	upk1b		hinfp.S		rnf19b.L
lhx1.S	slc22a4.L	cnn1.S		dkk1.L	sf3b6.S	lig3.L		smap2.L		rab9a.L
nrsn1.L	prss8	rps2		fgd5	sem1	mcm6.2.S		phf3.S		patl2.L
LOC108704973	rhebl1.L	lrrc75b		lhx1.S	pcna.L	srsf7.S		rell1.L		jmy.S
hand2.S	slc2a2.L	lrwd1.L		nrsn1.L	rps28p9.L	has1.S		specc1l.S		tmem57.L
cnih3.L	creb3l2.L	upk1b		LOC108704973	rhbdd2.S	cdca3.L		neo1.S		orc1.L
nuak1.L	tmem163.S	lig3.L		hand2.S	rps7.S	Xelaev18038969m		tnrc6b.L		usp31.L
tmem47.L	c2cd2.S	mcm6.2.S		cnih3.L	hras.L	uqcrq.S		fez2.L		cct4.L
LOC108709763	gprc5cl1.L	srsf7.S		nuak1.L	rgma.S	e2f7.S		sik3.L		axin1.L
hivep3.S	bambi.L	has1.S		tmem47.L	rps28p9.S	arrdc3.L		adam17.L		rel.S
osr1.S	capns1.L	cdca3.L		LOC108709763	hdgf.S	zc3h10.S		asxl3.S		fasn.L
Xelaev18011386m	mboat1.L	Xelaev18038969m		hivep3.S	h3f3c.L	tsc22d3.L		pou2f1.L		ercc4.L
LOC108719633	vangl1.L	uqcrq.S		osr1.S	arl1.L	LOC108698564		rai1.L		pcdh20.S
chrna1.L	prickle2.L	e2f7.S		Xelaev18011386m	hif-1a	cbx1.S		peli1.S		kpnb1.L
sytl2	LOC108710017	arrdc3.L		LOC108719633	ywhae.L	hexim1.L		oraov1.S		LOC100127794.L
mybpc2.L	ccnb3.L	zc3h10.S		chrna1.L	slc16a3.L	sh3bp4.S		oaz2		satb1.S
fam3d.S	uts2r	tsc22d3.L		sytl2	sap18.L	srsf2.L		map3k10.L		cfap97.L
atp6ap1.1.S	gas2l1.L	LOC108698564		mybpc2.L	rpl22.S	elf1.L		wdr89.L		exd1.L
pcdh8.2.L	fam198b.L	cbx1.S		fam3d.S	rps18	LOC108718254		cdca2-like.S		rad17.L
wnt6.L	adap1.L	hexim1.L		atp6ap1.1.S	hmgn3.L	alcam.L		tollip.S		znf654.L
rusc2.L	gprc5c.L	sh3bp4.S		pcdh8.2.L	usp5.S	hmgn1.S		eif2ak1.L		dph6.L
epha4.L	LOC108698063	srsf2.L		wnt6.L	apex1.S	unc50.S		wnk3.L		galnt4.L
ces2	ralgds.S	elf1.L		rusc2.L	h3-5.L	LOC108709393		tyro3.L		arhgef15.L
cass4.L	znf750.S	LOC108718254		epha4.L	brix1.S	hspa8.S		sesn2.S		espl1.L
fbln1.L	rhou	alcam.L		ces2	dnajc19.L	isg20l2.L		id2.S		LOC108698600
ror2.S	pkn1.L	hmgn1.S		cass4.L	ftmt.S	cdk1.S		pxn.S		LOC108719544
Xelaev18003060m	fsbp-like.L	unc50.S		fbln1.L	MGC84691	tceb3.S		zfp91.S		mast2.S
stard13.S	ccdc68.L	LOC108709393		ror2.S	tnpo3.S	psmg1.L		maz		arhgef18.S
ccnd1.S	fam212a.L	hspa8.S		Xelaev18003060m		utp15.S		kif1b.L		st3gal2.1.L
pkp1.L	krt.S	isg20l2.L		stard13.S		hnrnpa1		pard3.S		alg11.L
evx1.L	LOC108699910	cdk1.S		ccnd1.S		frmd4b.S		impad1.L		top1mt-like.L
mcf2l	psmg3.L	tceb3.S		pkp1.L		crocc.L		chst12.L		dock4.L
lgals4.L	ag1.L	psmg1.L		evx1.L		parp1.L		kpna2.L		spice1.L
amotl2.L	LOC108696785	utp15.S		mcf2l		rpl37.S		ctsd.S		map3k2.L
wnt16.L	Xelaev18043700m	hnrnpa1		lgals4.L		isg20l2.S		mnt.S		picalm.1.L
cmtm5.L	dlx5.S	frmd4b.S		amotl2.L		sppl3.L		rest.L		ptpn21.S
LOC108712665	sptbn4	crocc.L		wnt16.L		pxmp4.L		plin2.L		myd88.S
cd81.L	post3.S	parp1.L		cmtm5.L		dido1.L		rab13.L		hhipl1.L
rec8.L	post5.S	rpl37.S		LOC108712665		rbmx.L		taf5l.L		atf5.2.S
LOC108719085	arg2.S	isg20l2.S		cd81.L		rpl7a.S		ncor1.S		slc15a4.L
LOC495206	lsm4.L	sppl3.L		rec8.L		sf3b5.S		shank2.L		bicc1.L
pdp2.L	itga3.L	pxmp4.L		LOC108719085		prpf39.1.S		azi2		nsmf.S
nptx2.S	hspbp1.L	dido1.L		LOC495206		sertad1.S		cab39l.L		ankrd52.S
dock10.S	xicl	rbmx.L		pdp2.L		LOC108702825		gemin2.S		zbtb5.S
pkdcc.2.S	rassf6.S	rpl7a.S		nptx2.S		ints6l		smtnl2.S		zbtb14.L
stox1.S	tfap2a.L	sf3b5.S		dock10.S		rreb1.L		lrrc58.L		prc1.S
mug2	nectin4	prpf39.1.S		pkdcc.2.S		cldn4.L		LOC108719553		ddx1.L
Xelaev18032866m	grhl3.S	sertad1.S		stox1.S		erbb2.S		acvr2b.S		rab12.S
MGC79993	abcb1	hs6st1.L		mug2		rpl26.L		rbpj.L		gigyf2.S
nts.S	b4galt5.S	LOC108702825		Xelaev18032866m		cirbp.L		ccdc9.L		acap3.S
prr5l.L	esco2.S	ints6l		MGC79993		upk2.S		gmppb.L		ube2w.S
LOC108704612	nrarp	rreb1.L		nts.S		ccnt2.L		c11orf95.L		hip1r.S
fgf3.S	arhgef2.L	cldn4.L		prr5l.L		etaa1.S		idh3a.S		fam134c.L
tbx2.L	klf10.L	erbb2.S		LOC108704612		atf4.L		slc30a4.L		vps26b.S
msx2.L	LOC108701134	rpl26.L		fgf3.S		cfap52.L		ppp1r9a.L		rnf19a.L
Xelaev18021866m	LOC108701666	cirbp.L		tbx2.L		wdr12.L		lrrc41.S		mis18a.L
Xelaev18028212m	znf750.L	upk2.S		msx2.L		mpzl1.L		zc3h7a.L		LOC108699302
nell2.S	arhgef3.1.S	ccnt2.L		Xelaev18021866m		tjp2		rnf169.L		nus1.L
Xetrov90029963m.L	hexim1.S	etaa1.S		Xelaev18028212m		cdc34.S		ntng2.S		wasll.L
LOC108696914	cdk1.L	atf4.L		nell2.S		tuba4b.S		clasrp.L		mfap3l.L
pts.S	arrdc3.S	cfap52.L		Xetrov90029963m.L		MGC83421		ankrd11.L		blcap.L
slc4a1.S	LOC108715416	wdr12.L		LOC108696914		hmgb3.L		dlc1		arhgef12.S
spry2.L	slc7a5.L	mpzl1.L		pts.S		gtpbp4.L		mgme1.S		ippk.S
cdc42ep2	march7.S	tjp2		slc4a1.S		hmgb2.S		mia3		filip1.L
plxna4	pygm.L	cdc34.S		spry2.L		otud1.L		txn2.S		rb1cc1.L
slc7a11	fbp1.L	tuba4b.S		cdc42ep2		prdm15.S		tns3.L		slc39a14.L
1a11.L	ier5l.L	MGC83421		plxna4		hnrnpk.L		kdf1.L		sertad2.S
rorb.L	mxi1.S	hmgb3.L		slc7a11		rpl23.S		plekhf2.L		zdhhc7.S
srrm4	yeats4.L	gtpbp4.L		1a11.L		hnrnpu.S		peli1.L		stk35.S
slc38a2.L	bambi.S	hmgb2.S		rorb.L		asb7.L		rpa2.L		noct.S
tbx1.S	pim1.L	otud1.L		srrm4		lmo4.2.S		lyrm4.L		pard6g.L
LOC108714507	LOC108703754	prdm15.S		slc38a2.L		setd5		tbc1d12.S		tanc2
syn2.S	post7p.L	hnrnpk.L		tbx1.S		kcnk5.S		pacs2.L		nadk.S
egr4.L	upk1b.L	rpl23.S		LOC108714507		Xelaev18001896m		cdkn2aip.L		aak1
Xetrov90028231m.L	pdk4.L	hnrnpu.S		syn2.S		ckap5.L		c12orf66.L		mid1.S
Xelaev18028211m	zfp36l1.S	asb7.L		egr4.L		ubc.L		depdc1-b		kiaa1958
myrf.S	herpud1.S	lmo4.2.S		Xetrov90028231m.L		hnrnpl.L		cog3.S		zar1l.L
hesx1.L	rab11fip4l.L	dtx2.L		Xelaev18028211m		cables2.L		qrich1.1.L		lrr1.L
LOC101733888.L	nlrc4.L	setd5		myrf.S		hnrnpa2b1.L		trim33.S		hn1.S
flrt3.S	post10.L	kcnk5.S		hesx1.L		plk4.L		ipo13.S		snx11.L
maob.L	txnip.L	Xelaev18001896m		LOC101733888.L		hdlbp.L		prr14.L		emilin2.L
Xelaev18044137m	dlx6.S	ckap5.L		flrt3.S		Xelaev18001443m		MGC85120		dhx35.S
Xetrov90029923m.S	nrarp.S	ubc.L		maob.L		MGC52578		tpra1.S		znf282.S
lpar2.L	LOC108698396	hnrnpl.L		Xelaev18044137m		vgll4l.S		tbc1d31.L		tdrd15.L
ryr1	rnf225	cables2.L		Xetrov90029923m.S		rpl17.S		tiam1.S		gtf3c1.L
sema6a.L	dedd2.L	hnrnpa2b1.L		lpar2.L		khdrbs1.S		pcyt1a.S		LOC108705257
atp13a-like.S	dgkd-like.L	plk4.L		ryr1		hspa8.L		armc1.L		tbc1d9
efhb.L	rps21.S	hdlbp.L		sema6a.L		znf462.S		fbxo42.L		golga1.L
agr2.S	plekhg3	Xelaev18001443m		atp13a-like.S		sapcd2		ankrd11.S		tnrc6c.S
Xelaev18027269m	cdknx.L	MGC52578		efhb.L		wdr83os.L		elmod3.S		b4galnt4.S
kif5c	stx19.S	vgll4l.S		agr2.S		aurkb.L		tmem87b.L		fez2.S
fos.S	slc35a2.S	rpl17.S		Xelaev18027269m		prc1.L		gpank1.L		lysmd4.L
sgk223.S	znf653.L	khdrbs1.S		kif5c		nsep1		crtc3.S		arhgap35.S
tmprss4.L	rpl26.S	hspa8.L		fos.S		b3gnt2.S		gid8.L		nab1.S
LOC108698246	zfp36l1.L	znf462.S		sgk223.S		metrnl.L		ncoa4.L		letm2.S
c20orf96	scaf4.L	sapcd2		tmprss4.L		anp32c.S		polr2f.L		rhof.S
val.L	cdc25b.L	wdr83os.L		LOC108698246		muc5b		zfhx4.L		mast4.S
sez6l.S	ptch1.L	aurkb.L		c20orf96		rps4		spg21.L		habp4.L
dhcr7.S	tat.S	prc1.L		val.L		supt5h.S		nufip2.L		rcbtb1.S
syne3.L	emg1.L	nsep1		sez6l.S		gs17.L		chst13.S		tsen34.L
pou3f1.S	stat3.2.L	b3gnt2.S		dhcr7.S		tpd52l2.S		hps4.L		e2f4.L
fgf16	tmem79.L	metrnl.L		syne3.L		nol6.L		LOC108698338		lrp12.S
LOC108698349	tspan13.L	anp32c.S		pou3f1.S		rbm4b.L		LOC108701258		n4bp3.S
enpp2.L	cks1b.L	muc5b		fgf16		ptma.L		sptssa.S		usp22 a
LOC108710968	trpv2.L	rps4		LOC108698349		map3k1.L		bcl11a.L		pik3ca.S
kdr.S	pars2.L	supt5h.S		enpp2.L		utp15.L		fut1.S		ankrd37.S
nr4a1.L	plxnb1.S	gs17.L		LOC108710968		rfx2.L		fbxl19.S		sipa1l3.L
gsc.S	LOC108708564	tpd52l2.S		kdr.S		LOC108712538		zfyve19.L		fam53a.S
Xelaev18017809m	Xetrov90029311m.S	nol6.L		nr4a1.L		rfng.L		arg-a		nfkbil1.L
ptch2.L	ubb.L	rbm4b.L		gsc.S		rpl7.L		adam9.S		muc3a
LOC108699891	aim1.S	ptma.L		Xelaev18017809m		cirbp.S		zdhhc9.L		chmp7.L
lpar2.S	tcf7l1.S	map3k1.L		ptch2.L		rpl9.L		atmin.L		mllt1.L
slc39a8.L	rbm47.L	utp15.L		LOC108699891		ctps1.S		ppp3cc.S		diablo.L
rbm20.S	map2k6.L	rfx2.L		lpar2.S		psmd1.S		MGC85058		e2f1.L
mix1.S	Xelaev18003558m	LOC108712538		slc39a8.L		rpl31.L		rnf19a.S		rgs3.S
rasip1.L	ddx28.L	rfng.L		rbm20.S		menf.1.L		snx18.S		traf3.L
pdlim4.L	rnf222.S	rpl7.L		mix1.S		srsf2.S		znf516.L		leprotl1.S
anpep.S	ube2n.S	cirbp.S		rasip1.L		LOC100505446		oxct1.L		tnfrsf10b.L
lamb3.S	herpud1.L	rpl9.L		pdlim4.L		gnb2l1		gid4.L		tmem57.S
LOC108710827	xrcc1	ctps1.S		anpep.S		myef2.S		zyg11b.L		socs5.S
greb1.L	rnf135.L	psmd1.S		lamb3.S		hnrnpdl.L		asap2.S		lpar1.S
Xelaev18038470m	tsc22d1.L	rpl31.L		LOC108710827		hmgn1.L		nfatc3.L		atf7ip.S
Xelaev18029191m	rarg.S	menf.1.L		greb1.L		creb1.S		dennd2d.S		scnm1.L
Xelaev18017777m	nadk2.S	srsf2.S		Xelaev18038470m		Xelaev18042112m		itgb5.S		sbf2.S
itga6.L	gmps.L	LOC100505446		Xelaev18029191m		rps3.S		c5orf24.S		fam83g.L
Xelaev18006569m	rpl37a.L	gnb2l1		Xelaev18017777m		luc7l2.S		faim.S		hsd17b7.S
nxpe4.S	b4galt3.L	myef2.S		itga6.L		hnrnpdl.S		plekhm1.L		acap3.L
Xetrov90026715m.L	LOC108700281	hnrnpdl.L		Xelaev18006569m		efna4.L		slc27a4.S		cyld.L
lama5	awat1.L	hmgn1.L		nxpe4.S		myef2.L		fbxo10.L		grk3
LOC108704220	midn.S	creb1.S		Xetrov90026715m.L		ybx1.S		kbtbd8.S		nap1l4.S
Xelaev18024765m	chd2.L	Xelaev18042112m		lama5		mcrs1.S		rab5c.L		ccdc191.L
chst3.L	hdac7.L	rps3.S		LOC108704220		tm9sf3.S		arhgap21.L		kcnj5.L
dusp6.S	cdca4.S	luc7l2.S		Xelaev18024765m		MGC81970		magi1.L		plag1.S
LOC108704613	chst2.L	hnrnpdl.S		chst3.L		hist2h3d.L		siah1.S		kctd9.L
hsd17b6	rbm12b.L	efna4.L		dusp6.S		elob		kiaa0355.L		map3k2.S
LOC108710290	hsp70.L	myef2.L		LOC108704613		rps6.L		zfx.S		arhgap18.L
stum	upk1a.L	ybx1.S		hsd17b6		luc7l3.S		lin28b.S		dact3.S
Xelaev18010252m	xpnpep1.L	mcrs1.S		LOC108710290		cwc25.L		LOC108704685		dcun1d3.S
wnt11.L	slx4.L	tm9sf3.S		stum		msl1.S		hdac4.L		usp44.S
LOC108718164	gpatch8.S	MGC81970		Xelaev18010252m		tra2a.S		keap1.S		cse1l.S
draxin	rpl36a.S	hist2h3d.L		wnt11.L		eif5a.L		h1foo.S		LOC100489074.L
kit.L	btbd10.S	elob		LOC108718164		hnrnph3.L		arl6ip6.L		ralgapb.L
hoxc10	rpl34.S	rps6.L		draxin		smarce1.S		pxk.S		ints6.S
foxa4.S	selk.S	luc7l3.S		kit.L		prmt1.S		med26.L		gemin5
nav2.L	rfx2.S	cwc25.L		hoxc10		psmc5.L		btbd2.S		aktip.L
pmepa1.L	nipal4.S	msl1.S		foxa4.S		u2af2.S		LOC108697634		ccdc186.L
lgi4.L	LOC108709832	tra2a.S		nav2.L		api5.L		taf1a.L		nr3c1.L
lrig3.S	sox15.L	eif5a.L		pmepa1.L		fkbp1a.S		pias3.S		def8.S
LOC108701312	chd3	hnrnph3.L		lgi4.L		loc728026.L		tcf7.S		adamts6.S
Xelaev18006002m	rps27a.S	smarce1.S		lrig3.S		h2afz.L		tfap2c.S		atg9a.L
ca14.S	leprotl1.L	prmt1.S		LOC108701312		plrg1.S		ccnb1.2.S		adnp2.L
LOC108698352	rabgap1l.L	psmc5.L		Xelaev18006002m		jup.L		sepsecs.L		baiap2l2.S
aatk.S	cpt1a.L	u2af2.S		ca14.S		hmg-17		otud3.S		fastkd1.L
gjb2.L	gm20188	api5.L		LOC108698352		upk1b.S		gtse1		pias1.S
gne.L	grx5	fkbp1a.S		aatk.S		tpt1.L		arid4b.L		pigc.S
pitx3.L	rps7	loc728026.L		gjb2.L		nsa2.L		ywhag.S		exoc8.S
LOC108700036	bola2.L	h2afz.L		gne.L		slc25a5.L		gas6.L		zdhhc1.L
fgfrl1.L	dynll1.L	plrg1.S		pitx3.L		hmgn2.L		LOC100127316		sprtn.S
cabin1	il17rd.L	jup.L		LOC108700036		znf592.L		rab20.S		rpa2.S
abca8.L	rps12.L	hmg-17		fgfrl1.L		poldip3.L		plscr1.L		cyp1a1.S
LOC108713121	unknown.S	upk1b.S		cabin1		hnrnpab.L		slc25a19.L		asphd2.S
mapre2.L	rps9	tpt1.L		abca8.L		upk3a.L		pigu		alg6
nuak1	myl9.L	nsa2.L		LOC108713121		ilf2.L		cdyl.L		polg.L
Xetrov90015528m.L	rabgap1l.S	slc25a5.L		mapre2.L		atp6a1		n6amt1.L		usp8.S
LOC108708446	mknk2.S	hmgn2.L		nuak1		prmt1.L		zc3h6		def8.L
LOC108712674	mkrn2.L	znf592.L		Xetrov90015528m.L		bmp7.2.L		tdp2.S		ptprh.S
plekhg5.L	bcorl1.S	poldip3.L		LOC108708446		ddx39		phlpp1.S		sik2.S
Xelaev18001689m	kiaa0101.L	hnrnpab.L		LOC108712674		npm1.L		atp10a		tbc1d14.L
LOC108705533	uqcr11	upk3a.L		plekhg5.L		hmgn3.S		il17rd.S		MGC147172.L
LOC108709502	rps23.L	ilf2.L		Xelaev18001689m		smarce1.L		atp13a3.L		tmem51.L
nedd4l	gas2l1.S	atp6a1		LOC108705533		snrnp70.L		arl10b.S		wdr37.L
npy2r-like.1.L	LOC108698339	prmt1.L		LOC108709502		trim25		mier3.S		ell.S
snap91.S	atp1b1.S	bmp7.2.L		nedd4l		h3-3b		klhl8.L		haus8.L
zic5.L	rpl38.S	ddx39		npy2r-like.1.L		dcaf7.S		mapre3.L		lgr4.L
rev3l.S	rpl10.L	npm1.L		snap91.S		hnrnpa2b1.S		kctd3.S		zfyve9.S
usp43	esrp1.L	hmgn3.S		zic5.L		ccdc12.L		arhgap35.L		atxn7l1.S
akap12.S	eif4a1.L	smarce1.L		rev3l.S				ticrr.S		cnp.L
pnck.L	ino80b.S	snrnp70.L		usp43				foxj3.S		txndc11.L
nkx2-5.L	dgat1.L	trim25		akap12.S				rita1.S		med13l.S
chl1	taf12.S	h3-3b		pnck.L				fam189a2.L		ccdc171
loc495835.L	nop16.L	dcaf7.S		nkx2-5.L				LOC108710728		ei24.S
pmepa1.S	rps13.S	hnrnpa2b1.S		chl1				plk1.L		dnajb14.L
il6st.S	nop10	ccdc12.L		loc495835.L				atp8a1.L		slc39a1l.L
LOC108697063	gprc5c.S	bcar3.L		pmepa1.S				LOC108699992		atf7.S
onecut3.L	slc35a2.L	tubgcp3.S		il6st.S				LOC108701428		rlf.S
ppp1r18	LOC108701852	adnp.L		LOC108697063				znf770.L		plpp5.L
ccng1.L	rps25.S	gcc1.S		onecut3.L				ndc1.S		kazn.S
tbc1d24.2.S	kbtbd7.L	nploc4.S		ppp1r18				nsd1.S		trafd1.L
vstm2b.L	rpl36.S	ppip5k2.L		ccng1.L				enc1.S		rnf112.1.S
prdm14.L	pde3b	spty2d1.S		tbc1d24.2.S				mgat2.S		atg4a.S
nefl.L	elovl7.L	znf684.S		vstm2b.L				pdk4.S		nr1d1
fos.L	rpl28.S	rpgr.S		prdm14.L				akt1.S		spryd3.L
LOC101731753.L	smim19.L	gpr157.L		nefl.L				usp34.L		tor2a.L
tmcc1.S	rpl18a.S	znf782.S		fos.L				kif4a.L		golga5.S
notch2.L	MGC81028	kif23.L		LOC101731753.L				ncor2		mast4
nrip3.S	eif1b	tubg1.S		tmcc1.S				eea1.L		mtbp.S
Xelaev18026940m	sf3b6.S	ccnl1		notch2.L				phlpp1.L		eda.L
nfkbiz	sem1	arhgap32.S		nrip3.S				ppp2r1a.S		chek1.S
Xelaev18000337m	pcna.L	ttc37.L		Xelaev18026940m				arid1b.L		snx13.L
epn1.S	rps28p9.L	znf234.L		nfkbiz				etv6.S		pex12.L
LOC108698245	rhbdd2.S	fam214a.L		Xelaev18000337m				dicer1.L		hells.S
LOC108701822	rps7.S	exd2.L		epn1.S				hic2.L		rbm24.S
LOC108705022	hras.L	ubr5.L		LOC108698245				irf2bp2.S		snx25.L
klf5.L	rps28p9.S	mcoln2.L		LOC108701822				inf2.L		gpr75.L
kit.S	hdgf.S	rfc1.L		LOC108705022				lsm14b.S		b3gnt5.S
krt.L	h3f3c.L	baiap2l1.L		klf5.L				klhl22.L		sec24b.S
Xelaev18002446m	arl1.L	arf6.S		kit.S				loc100127873.L		LOC108711716
tbx6	hif-1a	prickle4.S		krt.L				tmem167b.L		commd9
Xelaev18043506m	ywhae.L	clk2.S		Xelaev18002446m				rmnd5a.L		LOC108714686
Xelaev18008846m	slc16a3.L	gpkow.L		tbx6				tesk2.L		prr14l
chrd.L	sap18.L	smagp.S		Xelaev18043506m				LOC108695528		ets1.S
map2.S	rpl22.S	cdc6.S		Xelaev18008846m				keap1.L		c11orf96.S
aplnr.L	rps18	ppp1r13b.L		chrd.L				rbm26.L		MGC83539
znf608.S	hmgn3.L	fcho2.L		map2.S				abhd17b.L		ago1.S
dusp1.S	usp5.S	haus6.S		aplnr.L				zfand2a.L		smg8.S
guca1a.S	apex1.S	mtmr10.L		znf608.S				ncoa6.L		acaca-like.S
fzd7.L	h3-5.L	batf3.S		dusp1.S				gfod2.L		fer.L
Xelaev18016751m	brix1.S	lemd3.S		guca1a.S				cep85l.L		bri3.L
Xelaev18015899m	dnajc19.L	exoc2.L		fzd7.L				fam49a.S		pde8a
LOC108706704	ftmt.S	dctn4.L		Xelaev18016751m				loc100489386.S		mfsd14a.S
rassf9.S	MGC84691	mapk7.L		Xelaev18015899m				afdn.S		loc100216027.L
ago2	tnpo3.S	wwp1.S		LOC108706704				znf507.S		osbpl3.L
ngfr.S		gtf2a1.L		rassf9.S				tbc1d10a.L		atat1.S
Xelaev18012280m		ccnl1.L		ago2				adam10		plxnb3.S
pcdh18.S		znf33a.L		ngfr.S				znf143.L		cyp2r1.L
fzd6.S		ankhd1.S		Xelaev18012280m				amfr.S		ddhd1.L
fam43a.S		tmem104.L		pcdh18.S				foxo3.S		fam53c.S
ccdc141.L		bmp2.S		fzd6.S				marchf5.S		ext1.L
fhdc1.S		pigb.S		fam43a.S				znf41.S		peak1.L
kcnab3.S		nckipsd.L		ccdc141.L				MGC83970		fut11.L
hao1.L		slc7a4.L		fhdc1.S				cmtm4.S		lbh.L
txnip.S		LOC108704268		kcnab3.S				uimc1.L		arhgef7.L
lhx1.L		baiap2l1.S		hao1.L				Xelaev18041850m		ccdc3.L
itga6.S		lin9.S		txnip.S				fntb.S		trim8.L
gss.L		lamtor3.S		lhx1.L				creb3l2.S		mex3d.L
Xelaev18034023m		chpt1.L		itga6.S				bod1.L		LOC108699404
LOC108706156		taf9b.L		gss.L				klhl15.L		arf3.S
Xelaev18010420m		tmem169.L		Xelaev18034023m				snx10.S		wdr59.L
dennd2c.S		rce1.S		LOC108706156				csrnp2.S		etv3l.S
fgf20.S		rab21.L		Xelaev18010420m				sec22a.L		srprb.L
Xetrov90015964m.S		luzp1.S		dennd2c.S				march5.L		wdr77.S
sdc4.L		zufsp.S		fgf20.S				rell1.S		zfpm1.S
syt10		tasp1.S		Xetrov90015964m.S				mtfr1l.L		smad2.S
tmem145.S		adnp.S		sdc4.L				arv1.S		ankrd54.L
LOC108700186		fam3c.L		syt10				vps33b.L		zcchc14.S
LOC108704134		atp2c1		tmem145.S				alkbh4.L		dnajb9.S
tmem255a.L		tdrp.S		LOC108700186				arf6.2.L		jade2.L
ptgs2.S		katnb1.L		LOC108704134				c11orf24		gm29884
LOC108708505		stox2		chrd				ankrd13c.S		irf2bpl.S
fam174b.L		cebpg.L		tmem255a.L				sh2b1.S		cbwd1.1.L
plk3.L		svil.L		ptgs2.S				bbs1.L		ntmt1.S
LOC108704219		mex3d.S		LOC108708505				MGC79091		pms2.L
heg1.L		ficd.L		fam174b.L				sdr42e1.L		evc2.L
ptgs2.L		dcp1a		plk3.L				rgs12.S		chmp1a.S
fam167a.S		avpi1.S		LOC108704219				camsap1		tmem170a.S
prnp.S		rb1cc1.S		heg1.L				pias4.L		aldh2.L
lhx3.S		loc733556.L		ptgs2.L				peak1.S		slc30a7.S
aacs.L		agap1		fam167a.S				c1orf84.L		trps1.L
irx2.S		git2.L		prnp.S				lats2.S		plch2
tph1.S		r3hdm1.S		lhx3.S				Xelaev18003737m		glce.S
tprg1l		rfwd2.S		aacs.L				bach2.S		loc100145507.S
Xelaev18036963m		rcan3.L		irx2.S				gtpbp2.S		rnf44.L
LOC108707237		atp9b.L		tph1.S				dnajc13.L		socs6.L
celf4.L		vps13d.L		tprg1l				cdc14b.S		ccnb2.S
tox2.L		prrg1.L		Xelaev18036963m				elac1.L		tubgcp3.L
klhdc8a.S		atp13a4.S		LOC108707237				pef1.S		dync1li2.L
ano5.S		eri2.L		celf4.L				dab2ip.L		tmem143.S
fpgs.S		fut8.S		tox2.L				fem1b.L		sos1.S
LOC108698417		tank.S		klhdc8a.S				cul2.L		mink1
Xelaev18000237m		pex10.L		ano5.S				tead1.S		loc100493164.L
pear1.L		arhgef7.S		fpgs.S				cdkn2aip.S		ttc8.L
pou3f1.L		crem.L		LOC108698417				Xelaev18000085m		grinl1a.L
pou5f3.1.S		LOC108704248		Xelaev18000237m				ca12.L		lpar5.S
smc4		pdzd2.S		pear1.L				rassf2.L		mitd1.L
pax3.L		top1.2.S		pou3f1.L				cd59-like.L		LOC108707252
Xelaev18002673m		tmtc3.L		pou5f3.1.S				fgd3.S		LOC108719562
Xelaev18026939m		b3gnt5.L		smc4				tcp1.S		abhd13.S
LOC108697537		zfc3h1		pax3.L				zmynd8.S		rnf138.S
hoxd9.S		poc5.L		Xelaev18002673m				pim3.L		arhgap20
LOC101733813.1		dars2.L		Xelaev18026939m				ei24.L		bicc1.S
Xelaev18001619m		eri1.L		LOC108697537				oxr1.L		kank1.L
zfp36l2.L		psat1.L		hoxd9.S				zbed4.L		saysd1.L
fam46a.L		ankle2.L		LOC101733813.1				csgalnact2.L		gsap.L
lpar6.S		ypel1.S		Xelaev18001619m				mier3.L		uspl1.S
Xelaev18002226m		scap.L		zfp36l2.L				tsc22d1		rpap1.S
Xelaev18004736m		gpi.L		fam46a.L				man2a2.L		chmp1a
xhoxc8		picalm.1.S		lpar6.S				ccdc64.L		vldlr.L
tmprss9		plxna3.S		Xelaev18002226m				derl2l.L		tmem110.L
ankrd24.L		ate1.L		Xelaev18004736m				pigv.S		cnksr2.L
aldh1a2.L		gnai2.S		xhoxc8				rgcc.L		myo1e.1.L
LOC108703375		stx11.S		tmprss9				lrrcc1.L		trabd.L
myo5c.L		ercc8.S		ankrd24.L				mpst		akap10.L
pcdh7.S		tprn		aldh1a2.L				wtip.S		ccdc69.L
LOC108705740		LOC108704624		LOC108703375				spty2d1.L		c10orf2.L
trpm4		rnf217.L		myo5c.L				pde10a.S		slc18a2.L
ngef.S		pcyox1.L		pcdh7.S				rad1.L		gtpbp6.S
mn1.L		slc30a6.S		LOC108705740				znf250.S		dnajb14.S
ca14.L		gatad2b		trpm4				setbp1.L		coq6.L
foxa4.L		rnf8.L		ngef.S				zrsr2.L		optn.L
nek6		tnfsf11.S		mn1.L				ppp2r2d		mos.L
slc16a5-like.S		kmt2c.L		ca14.L				iqgap3.L		depdc7.S
mettl7a.L		mtmr2.L		foxa4.L				carkd.S		ung.L
trpc6.L		tmem5.S		nek6				ado.L		rnf149.L
loc100496061.L		arhgap32.L		slc16a5-like.S				slc30a1.L		tpst2.S
tfr2.L		rnf145.S		mettl7a.L				tnfaip1.L		fam21a.L
hunk.S		qrich1.1.S		trpc6.L				LOC108719648		kiaa1715.L
lama3.L		MGC83673		loc100496061.L				ube2j2.L		dok1.L
Xelaev18037263m		fam107b.S		tfr2.L				ddx3x.L		ncoa7.L
igfbp4.L		cep126		hunk.S				clint1.L		itpk1.S
gja5.S		snx13.S		lama3.L				LOC108705734		mad2l1bp-like.L
dleu7.L		cd276.S		Xelaev18037263m				unnamed.S		dock9
Xelaev18038471m		srgap2.S		igfbp4.L				cidec.S		ammecr1l.L
LOC108712221		eea1.S		gja5.S				btbd3.S		tesk2.S
sh3bp4.L		vash1.L		dleu7.L				LOC108719489		slf1.L
kiaa1324l.L		borcs7.S		Xelaev18038471m				ing2.L		slf2.L
spry4.S		usp32.S		LOC108712221				tnpo1.S		sirt3.2.L
prtg.S		furin.L		sh3bp4.L				ccdc130.L		tmtc2.S
Xelaev18035105m		oxr1.L		kiaa1324l.L				ddx19b.L		etaa1.L
sall1.L		pym1.S		spry4.S				suco.S		tanc1-like.S
sox17a.L		bag5.S		prtg.S				nck1.L		tspoap1.L
tmem158.S		zbtb24.L		Xelaev18035105m				Xelaev18023494m		slc30a5.S
pnpla7.L		cep85l		sall1.L				spopl.L		gpr63.L
cebpd.S		med4.S		sox17a.L				morf4l1.S		myo1e
chgb.L		LOC108707483		tmem158.S				gab1.S		vldlr.S
LOC108704127		arap1		pnpla7.L				c10orf35.L		Xelaev18026797m
zswim4.L		blm.L		cebpd.S				znf438.S		ino80d.S
LOC108718887		ppp1r21.L		chgb.L				rgma.S		fibp.L
Xelaev18018260m		ints14.S		LOC108704127				malt1		fam110b.S
LOC108697415		cnot8.S		zswim4.L				slc39a3.S		prdx2.L
fbn3.L		fryl.S		LOC108718887				mtus1		zar1l.S
pced1a.S		dyrk3.S		Xelaev18018260m				nfat5.L		atad3a.S
sox8.L		pcgf2.L		LOC108697415				ncln.S		rsbn1.L
plekhn1.S		bptf.L		fbn3.L				tbc1d25.S		tle4.S
acod1		rgma.S		pced1a.S				gosr1.L		atp10b
ras-dva1.S		klhl7.S		sox8.L				avpi1.L		c8orf88
tsku.S		ccdc126.S		plekhn1.S				tmem128.S		znf577.S
kmt2a.S		dnajc16.S		acod1				map3k8.S		foxh1.L
krt16.S		gatsl3.L		ras-dva1.S				mgat1.L		fam104a.S
leng8.S		cdkl5.L		tsku.S				gigyf2.L		aldh18a1.L
bcar1.L		fbxl12.L		kmt2a.S				dlg3.S		dock4
eaf1.S		socs5.L		krt16.S				stk17a.L		stmn1.S
mmp14		abcb6.L		leng8.S				not.S		aco2.L
styk1.S		nf1.S		bcar1.L				kif22.L		ubxn2b.L
homeobox100496651-provi		znf436		eaf1.S				atxn1l.S		map2k4.S
cd99l2.S		etnk1.S		mmp14				entpd4.S		tnrc6c.L
sema4a.S		tdh.S		styk1.S				lix1l.S		bcl6.L
MGC81393		epb41l4b.S		homeobox100496651-provi				sbf2.L		bfar.L
Xelaev18016829m		znf577.L		cd99l2.S				ildr1.S		tmem181.L
lama5.L		cry1.L		sema4a.S				kpna4.L		prmt5.S
pou6f1.L		chd8.L		MGC81393				zwilch.S		prmt5.L
bnip2		fam189a1.S		Xelaev18016829m				atp8a1.S		LOC108695571
atf3.L		asb6.S		lama5.L				lats1.S		parp15
sox17b.1.S		tada3.S		pou6f1.L				rrm2.2.L		pex11a.L
ptpro.L		b4galt5.L		bnip2				mphosph9.L		uspl1-like.L
atp1a3.L		aebp2.S		atf3.L				rubcn.L		foxi2.L
LOC108705810		ppp1r12a.S		sox17b.1.S				irf2bpl.L		sema4d
fth1.L		atp6v0a2.L		ptpro.L				arf6.2.S		itga5.S
commd3.S		MGC115510		atp1a3.L				ric1.S		syap1.S
yrdc		vsig10.L		LOC108705810				nfe2l1.L		MGC131307
kcnq1		ap5b1.L		fth1.L				tmem45b.L		irf2.S
mix1.L		slain2.S		commd3.S				spred2.L		ccnb1.S
LOC108704510		LOC108699305		yrdc				tmem203.S		r3hdm4.L
bmpr1b.L		ttc9.L		kcnq1				atg4a.L		frmd4a.L
slc35d2		stambp.L		mix1.L				ccdc14		kazn.L
muc1.S		palb2.L		LOC108704510				nanp.L		LOC108709196
hs3st3a1.L		katnb1.S		bmpr1b.L				hps5.L		hs3st1
arhgef40.S		vps54.L		slc35d2				syde2.S		plpp6.L
myod1.S		ccnyl1.S		muc1.S				ppp1r12a.L		mb21d2.S
stox1.L		znf268		hs3st3a1.L				vps50.L		thumpd2.L
kirrel2.S		strbp.L		arhgef40.S				pxylp1.S		trappc13.L
slc18a1		senp1.L		myod1.S				b4galt6.L		camsap1.L
spred1.S		rab8b.L		stox1.L				LOC108700788		ppm1h.L
stard13.L		kiaa1456.L		kirrel2.S				nek8.S		tmem64.L
hsh2d		slc15a4.S		slc18a1				phactr4.L		aak1.S
rab34.L		ptpn12.S		spred1.S				mief2.S		mkl1.S
zic1.L		kiaa1191.L		stard13.L				cbwd1.1.S		Xelaev18011044m
dlc1.L		thap1		hsh2d				rhog-like.1.S		dand5.L
LOC108708391		myo19.S		rab34.L				spin1.L		arhgap11a.2.L
spry2.S		cry4.L		zic1.L				setdb2.S		casd1.L
tmprss2.11.L		coq10a.L		dlc1.L				ydjc.S		mctp2.L
ggt1.L		cry2.S		LOC108708391				cgnl1.S		rassf10.S
LOC108702593		usp22.S		spry2.S				rxrg.L		prr14l.L
LOC108718316		usp46.L		tmprss2.11.L				rab8a.L		kctd3.L
loc108648340.L		pwwp2b.L		ggt1.L				srebf2.L		Xelaev18030392m
wnt5b.L		rgs12.L		LOC108702593				gnal.L		gramd2b.S
MGC82975		fam69a.L		LOC108718316				otud7b.S		cdc37l1.S
ltbr		Xelaev18034523m		loc108648340.L				ubtd1.S		dsc3.S
vegt.L		slc35e2b.L		wnt5b.L				cmip.S		rin3.L
LOC108711841		kiaa2026.L		MGC82975				unc5b		birc7.S
lrp2.L		mastl.S		ltbr				vamp4.L		tmem259.L
p2ry11.S		fbxl18.L		vegt.L				vps4b.L		LOC108696212
ptpn14.L		cited2.L		LOC108711841				vkorc1l1.L		klhl17.L
dhcr7.L		ubn2.S		lrp2.L				mfsd11.S		helb.L
LOC108709649		rfxap.S		p2ry11.S				asap2		bcl6.S
galnt18.S		scyl2.S		ptpn14.L				timm8a.L		slc8b1.S
Xelaev18010896m		gnpat.S		dhcr7.L				znf516.S		cenpl.S
LOC108700092		uvrag.L		LOC108709649				slc39a9.L		mpp5.S
cebpa.S		prex1.L		galnt18.S				mfsd14a.L		map7d3.L
Xelaev18044351m		ptpn12.L		Xelaev18010896m				slc35a5.L		arhgef17.L
parp2.L		dact1.S		LOC108700092				gmnn.S		siah2.L
wee1.S		fignl1.L		cebpa.S				edc3.L		adh5.L
cd151.S		zbtb33.L		Xelaev18044351m				c1galt1.S		fam46b.S
eva1a.L		arid4b.S		parp2.L				spryd3.S		slc25a37.L
otx1.S		znf507.L		wee1.S				rsf1		loc100158305.L
LOC108719251		lgalsl.S		cd151.S				cbfa2t2.L		Xelaev18013924m
gabarapl1-b		e2f4.S		eva1a.L				vps37a.S		ago1.L
adamts1.S		tbccd1.L		otx1.S				sys1.S		socs6.S
mespb.S		cep104.S		LOC108719251				samd4b.L		ikzf4.S
vwa5a.L		cerk.S		gabarapl1-b				dnaja4.2.S		pgam1.S
znrf3.S		znf335.L		adamts1.S				inf2.S		spopl.S
ier2.L		smtn.S		mespb.S				MGC83705		idh3a.L
acod1l.L		prex1.S		vwa5a.L				otud3.L		hlf.S
aldh1a2.S		ppp3cc.L		znrf3.S				ap4e1.S		gtf2ird2b
fam110c.S		usp44.L		ier2.L				sema6d.L		rab11fip1.S
fbxo34.L		cog1.S		acod1l.L				dock7.L		leprot.L
ssh2.L		scarb2.S		aldh1a2.S				smg7.L		myocd.S
Xelaev18021795m		dbf4b.L		fam110c.S				dag1.S		cpeb3.S
osr2.L		mphosph6.L		fbxo34.L				msl2.L		casp9.S
Xelaev18013483m		pag1.S		ssh2.L				mllt10.L		gcnt1.L
cdc14b.L		pwwp2b.S		Xelaev18021795m				tmc7.S		styx.L
sgk1.S		tmem51.S		osr2.L				sptssb.L		LOC108718425
aplnr.S		atrip.L		Xelaev18013483m				tmcc3.L		josd1.S
lypd2.L		rsf1.S		cdc14b.L				rab5d.S		ppargc1b.L
rbfox3		vezt.L		sgk1.S				sik3.S		hells.L
ulk1.S		LOC108716797		aplnr.S				c17orf53.L		e2f1.S
LOC108709430		bbs2.S		lypd2.L				ube2z.L		fam53a.L
skil.S		trpv4.L		rbfox3				csnk1d.L		klf15.2.L
muc17		rnf19b.S		ulk1.S				ccser2.L		rassf3.S
tsc1.S		acot12.L		LOC108709430				mgat5		fhdc1
prkcd		golph3l.S		skil.S				casc4.S		rif1.S
vegt.S		cables1.L		muc17				sel1l.S		disp1.L
ventx2.1.L		rnf219.L		tsc1.S				klhl20.S		ikzf2.L
Xelaev18011097m		LOC108704263		prkcd				vps18.S		ring1.S
irg1.L		rnf169.S		vegt.S				ifih1.L		cbx4.S
ctsf.L		pbx3		ventx2.1.L				lrif1		sun1.L
pth1r.L		Xelaev18031390m		Xelaev18011097m				fyn.S		hprt1.L
shbg		tcf20.S		irg1.L				fam199x.L		katnbl1.L
scin.L		jmy.L		ctsf.L				ctsc.L		fbxo30.L
mapkapk5.L		nemp1.L		pth1r.L				cox5b.2.L		tor1a.S
sox9.L		b3gnt7.S		shbg				bcl9l.S		cyld.S
tmcc1.L		lhfpl2.S		scin.L				thg1l.L		ppp1r3b.L
best2.L		arhgef11.S		mapkapk5.L				cyth1.S		hs3st1.S
plk3.S		papd5.S		sox9.L				lss.S		fbxo30.S
LOC108714958		ints6.L		tmcc1.L				ccdc107		zfp36l2.2.L
loc733735.L		sphk1.L		best2.L				cpeb4.S		tubg1.L
gatd3b		fbxo46.S		plk3.S				ing3.L		ndel1.L
vgll3.L		mthfr.L		LOC108714958				ptpn23.L		ptpn21.L
Xelaev18030357m		ormdl1.S		loc733735.L				mesdc1.S		fbxw9.S
mob2.2.L		vps13c.L		gatd3b				fbxl15.L		tpst2.L
fosl1.S		MGC85180		vgll3.L				ppp1r37.L		klhl13.L
hamp2.L		orai2.S		Xelaev18030357m				rab11fip5.L		nlrx1.L
tril.S		tank.L		mob2.2.L				carf.L		sertad2.L
LOC108719506		taf4b.S		fosl1.S				dnmt1.S		fam8a1.L
adamts19.L		kmt2b		hamp2.L				bicd1.L		b9d2.L
Xetrov90005150m.S		fchsd2		tril.S				sdc3		ndst2.L
cep19.L		wdr60.S		LOC108719506				tmcc2.S		txndc9.L
itgb1.S		zbtb37.L		adamts19.L				usp33.S		wdr60.L
dusp5.L		Xelaev18033527m		Xetrov90005150m.S				march8.S		adrb3.L
LOC108695556		stambp.S		cep19.L				sfrp2.S		cmtm7.S
Xelaev18000483m		ranbp2.S		itgb1.S				znf462.L		ncoa6.S
osr2.S		scai		dusp5.L				jade3.L		mob3c.S
pmm2.L		plekhg4.L		LOC108695556				tdrd6.L		sik2.L
lpar6.L		stc1.L		Xelaev18000483m				erp29.S		plcl2.L
pros1.L		orai2.L		osr2.S				znf238.2.L		Xelaev18021540m
nrip3.L		brca2.L		pmm2.L				prodh.L		trak1
tfcp2l1.L		tnfsf11.L		lpar6.L				tbpl1.L		garem1.S
rbm5.S		zbed6		pros1.L				fzd5.L		tpcn2.L
slc26a11.L		LOC108704241		nrip3.L				cers5.L		LOC108708627
ubxn11.S		nus1.S		tfcp2l1.L				kdm7a		oat.1.S
gna11		slc39a10		rbm5.S				LOC108701166		pcnt.L
sephs1.L		ulk2.L		slc26a11.L				LOC108703834		stc1.S
LOC108715921		atl2-like.S		ubxn11.S				Xelaev18030446m		ccnb1.L
has2.L		trit1.L		gna11				cap1.S		dnajb9.L
runx1		tbc1d2b.S		sephs1.L				fem1c.S		nhlrc3.S
hoxd9.L		haus6.L		LOC108715921				grhl1.S		leprot.S
glrx5.L		paqr3.L		has2.L				trerf1.L		tanc1-like.L
LOC108714970		jade3.S		runx1				gpbp1.L		limd2.S
loc108715171.S		ect2.S		hoxd9.L				cep55-like.L		pcnxl4.L
eomes.S		slc25a44.S		glrx5.L				pomgnt2.L		btg4.S
LOC397693		c5orf51.L		LOC108714970				rab33b.L		fam134b.S
fgf20.L		zdhhc12.L		loc108715171.S				btg-x		pif1.L
hes7.2.L		snx7.L		eomes.S				mark1.L		hes2.L
mapre2.S		efcab14.L		LOC397693				tnfaip8.L		ndel1.S
ier2.S		wdr7.S		fgf20.L				prkcz.L		garem1.L
atg16l1.L		irs1.S		hes7.2.L				cab39.S		rnf103.L
dst.L		sec24b.L		mapre2.S				hbp1.L		klhl13.S
Xelaev18019163m		rictor		ier2.S				znf26		LOC108703747
zbtb18.S		trim39.L		atg16l1.L				xrcc2.L		them6.L
wee2a		csgalnact1.L		dst.L				plekhg1.S		tbp.L
xetrov90011961m.S		smc5.S		Xelaev18019163m				nufip2.S		clns1a
MGC52759		klhl12.S		zbtb18.S				atf7ip2		pou5f3.3.L
litaf.L		ranbp2.L		wee2a				disp1.S		rnf149.S
plcl2		bach1.L		xetrov90011961m.S				rnf220.1.L		tbp.S
LOC108718070		mllt4.L		MGC52759				cbx2.S		simc1.L
dusp11.2.L		ptcd2.L		litaf.L				snx4.S		amot.L
neurl1b.L		chpf.S		plcl2				rfx7.L		ythdc2.L
slc2a1.S		arhgef12.L		LOC108718070				nsmaf.L		rpain.S
LOC108698461		tor1aip1-like.L		dusp11.2.L				araf.S		wdr6.L
foxc1.S		cracr2b.S		neurl1b.L				lrch1.S		sod2.S
trib1.L		pex12.S		slc2a1.S				esg2-a		c1orf116.L
btg1.L		gmnn.L		LOC108698461				znf318.S		plbd2.L
lhx8.S		marchf2		foxc1.S				Xelaev18028646m		arhgap20.L
xvent-2b		mbd4.L		trib1.L				atl3.L		cables1.S
zdhhc2.L		ky		btg1.L				angel2.L		ptpn3.S
snrk.S		akap13.S		lhx8.S				atf7ip.L		rsbn1l.S
t2.S		znf639.S		xvent-2b				f2rl1.S		ndst2.S
admp2.L		ube2j2.S		zdhhc2.L				Xelaev18029053m		sun1.S
mbd6.S		dapk1.L		snrk.S				got2.L		tpgs1.L
klf6.S		saxo2.L		t2.S				zfyve1.L		kif13a
xkr5.L		rapgef2.S		admp2.L				zcchc14.L		tdrd15.S
aagab.L		ism1.L		mbd6.S				cmip.L		fbxo43.L
tacc2.L		usp15.S		klf6.S				tpcn2		pou5f3.3.S
flrt3.L		dpp9.L		xkr5.L				lysmd3.L		ppp1r3b.S
aasdh.L		klhdc10.L		aagab.L				nodal.L		znrf1.S
ccno.L		fam102b.L		tacc2.L				gpr160.L		trim2.L
cbln1.L		sept8.S		flrt3.L				npat.S		btg4.L
galnt7.S		men1.L		aasdh.L				xl64phr		fbxo43.S
fam109b.L		ttc31.L		ccno.L				sbds.L		rsbn1l.L
dctn4.S		zbtb6.S		irs2				ubl3.S		mylip.S
LOC108712218		Xelaev18032680m		cbln1.L				furin.S		zfp36l2.1.S
pcdh7.L		cttnbp2nl.L		galnt7.S				adgrl2.S		LOC108702912
Xelaev18001309m		msantd3.S		fam109b.L				chek1.L		mlh1.S
hoxc12.S		chp1.L		dctn4.S				trim33.L		kiaa0922.S
LOC108717933		dip2b		LOC108712218				fbxo31.L		tmem131l.L
hcfc2.L		slc22a23.S		pcdh7.L				slc46a1.L		cpeb1.S
vps37d.S		anapc13.1.L		Xelaev18001309m				zbtb16.S		nhsl1
gpr45.S		slc17a9.L		hoxc12.S				zranb1.S		slc48a1.S
ppp1r10.S		MGC86530		LOC108717933				chst8.L		kctd9.S
slitrk5.S		msantd3.L		hcfc2.L				ganab.L		slc35a1.L
rab11fip3.S		agap1.L		vps37d.S				abhd2.L		ikzf2.S
LOC108719533		pkd2.L		gpr45.S				zbtb8a.2.S		ccna1.L
LOC108705598		smtn.L		ppp1r10.S				josd1.L		tnfrsf19.S
spint2.L		ncoa3.S		slitrk5.S				mycl.S		ssx2ip.L
entpd2.S		uhrf1bp1l.L		rab11fip3.S				usf3.S		cdca7
Xelaev18029885m		trerf1.S		LOC108719533				gxylt1.L		serinc2.L
LOC108717435		pak7.L		LOC108705598				micall1.L		apc2.L
Xelaev18003995m		rab8a.S		spint2.L				ssh1.L		ssx2ip.S
LOC100489157-like.S		slc30a7.L		entpd2.S				MGC83487		znf81.L
casp7		unc119.L		Xelaev18029885m				fzr1.L		btg5.1.L
dusp5.S		sertad2		LOC108717435				fdxacb1.L		aktip.S
nav2.S		tbk1.S		Xelaev18003995m				ckap2.S		rspry1.S
ugp2.S		ext1.S		LOC100489157-like.S				akap13.L		LOC108717918
Xelaev18000325m		siva1.L		casp7				LOC108719494		MGC68639
LOC108705749		cep350.S		dusp5.S				traf3ip1.S		znrf1.L
ccno.S		atp8b1.L		nav2.S				dcaf12.L		cat.2.L
hist2h2ab.S		btbd3.L		ugp2.S				pdik1l.L		akip1
pcdh9.L		spdl1.L		Xelaev18000325m				rasef		cpeb1.L
tgif2.L		gse1.S		LOC108705749				cdc42bpb		LOC108705579
cdk5r1.L		ubap1.L		ccno.S				nr2c1.L		hes7.1.L
sst.S		rnf19b.L		hist2h2ab.S				c12orf66.S
marcksl1.L		rab9a.L		pcdh9.L				cpeb2-like.S
gadd45g.S		patl2.L		tgif2.L				pard6g.S
n4bp3.L		jmy.S		cdk5r1.L				zbtb26.S
hes7.2.S		tmem57.L		sst.S				lrmp.L
frem2		orc1.L		marcksl1.L				sys1.L
rbm14.L		usp31.L		gadd45g.S				anapc7.L
irs2.L		cct4.L		n4bp3.L				crebbp.S
tmem45a.L		axin1.L		hes7.2.S				pds5b.L
snai1.S		rel.S		frem2				prdm10.L
prpf8		fasn.L		rbm14.L				cse1l.L
pcdha13.L		ercc4.L		irs2.L				atg14.L
LOC108719510		pcdh20.S		tmem45a.L				rfx7
vezf1.S		kpnb1.L		snai1.S				kbtbd8.L
Xelaev18007952m		LOC100127794.L		prpf8				cpeb4
itprip.L		satb1.S		pcdha13.L				fzd3.L
ces5a		cfap97.L		LOC108719510				rac3.L
glul-like.1.S		exd1.L		vezf1.S				gcc1.L
cyb561.L		rad17.L		Xelaev18007952m				ccdc92.S
cacnb2.L		znf654.L		itprip.L				rps6ka3.L
adcyap1.S		dph6.L		ces5a				apc.S
spry1.L		galnt4.L		glul-like.1.S				nadk.L
kcnh2		arhgef15.L		cyb561.L				apol1
LOC108717924		espl1.L		cacnb2.L				tmem107
Xetrov90024734m.S		LOC108698600		adcyap1.S				dcaf5.L
cdc42ep4		LOC108719544		spry1.L				tmem136.L
LOC108699904		mast2.S		kcnh2				tgfbrap1.L
stat5b.L		arhgef18.S		LOC108717924				nedd9.L
lamc1.L		st3gal2.1.L		Xetrov90024734m.S				gopc.L
LOC108704568		alg11.L		cdc42ep4				LOC108708787
MGC81482		top1mt-like.L		LOC108699904				fam46b.L
sall1		dock4.L		stat5b.L				mfsd13a.L
hhex.S		spice1.L		lamc1.L				ccr4.L
col18a1.L		map3k2.L		LOC108704568				ets1.L
sp5l.S		picalm.1.L		MGC81482				kifc3.S
arhgap29.L		ptpn21.S		sall1				mtmr8
csrnp1.L		myd88.S		hhex.S				maz.S
LOC108718647		hhipl1.L		col18a1.L				usp49.S
acvr1.L		atf5.2.S		sp5l.S				setbp1.S
rhpn2.S		slc15a4.L		arhgap29.L				enox1.L
arrdc2.L		bicc1.L		csrnp1.L				ikzf5.L
cyp27c1.S		nsmf.S		LOC108718647				dusp4.L
farp2.S		ankrd52.S		acvr1.L				sdc1.L
plekhg1.L		zbtb5.S		rhpn2.S				plekha3.L
sp7.L		zbtb14.L		arrdc2.L				LOC100491090.L
cyp2c8.1.L		prc1.S		cyp27c1.S				LOC108704260
lrriq3.S		ddx1.L		farp2.S				rrm2.2.S
per3.L		rab12.S		plekhg1.L				bcl2l11.L
LOC108714321		gigyf2.S		sp7.L				lrrc47.L
mapk6.L		acap3.S		cyp2c8.1.L				fam13a.L
kiaa1324.S		ube2w.S		lrriq3.S				derl2.S
sap30.S		hip1r.S		per3.L				araf.L
star.L		fam134c.L		LOC108714321				zar2.L
metrnl.S		vps26b.S		mapk6.L				rffl.L
ssbp3.L		rnf19a.L		kiaa1324.S				pikfyve.L
pvrl2.L		mis18a.L		sap30.S				tmem189
npdc1.1.S		LOC108699302		star.L				aip.L
pitx2.S		nus1.L		metrnl.S				elmod2.L
mcl1.S		wasll.L		ssbp3.L				tbc1d8
LOC100489554.L		mfap3l.L		pvrl2.L				LOC108698716
enc1.L		blcap.L		npdc1.1.S				foxo3.L
wdr83os.S		arhgef12.S		sgk223.L				LOC108701404
znrf3.L		ippk.S		pitx2.S				znf644.S
pou5f3.2.S		filip1.L		mcl1.S				xpo4.S
LOC108698488		rb1cc1.L		LOC100489554.L				pik3cb.S
dusp6.L		slc39a14.L		enc1.L				dolpp1
dnajc30.L		sertad2.S		wdr83os.S				MGC84581
socs4.L		zdhhc7.S		znrf3.L				bet1.L
nr2f1.L		stk35.S		pou5f3.2.S				hivep1.S
angpt4.S		noct.S		LOC108698488				apc.L
usp43.L		pard6g.L		dusp6.L				tcirg1.L
supv3l1		tanc2		dnajc30.L				mgea5.S
peli2.L		nadk.S		socs4.L				abhd13.L
LOC100158389		aak1		nr2f1.L				arv1.L
cdh26.S		mid1.S		angpt4.S				rabgef1.L
plekho1.L		kiaa1958		usp43.L				gtf2h2.S
hunk.L		zar1l.L		supv3l1				zfand1.L
arhgef16.S		lrr1.L		peli2.L				snx16.S
nuak1.S		hn1.S		LOC100158389				zbtb47.S
Xelaev18002313m		snx11.L		cdh26.S				cdkn2d.L
znf585b.S		emilin2.L		plekho1.L				arl15.S
ep300.L		dhx35.S		hunk.L				ifnar2.L
prrt4		znf282.S		arhgef16.S				c21orf91.S
crebzf.S		tdrd15.L		nuak1.S				kiaa0100.L
notch3.L		gtf3c1.L		Xelaev18002313m				otud4.L
slc9a3.L		LOC108705257		znf585b.S				Xelaev18027888m
tmem178b		tbc1d9		ep300.L				tradd.L
ptmap12.S		golga1.L		prrt4				LOC108718446
itprip.S		tnrc6c.S		crebzf.S				ccne2.S
ckap4.L		b4galnt4.S		notch3.L				nde1.L
sox4.L		fez2.S		slc9a3.L				LOC108711754
plgrkt.L		lysmd4.L		tmem178b				baz1a.L
mat2a.S		arhgap35.S		ptmap12.S				btbd6.S
actb.S		nab1.S		itprip.S				LOC108717147
ano5.L		letm2.S		ckap4.L				pygo2.L
myo5b.S		rhof.S		sox4.L				slc9a7
dhrs3.S		mast4.S		plgrkt.L				ccdc186
ep300.S		habp4.L		mat2a.S				phkg2.L
g2e3.L		rcbtb1.S		actb.S				prdm2.L
plpp2.L		tsen34.L		ano5.L				ect2.L
ankrd50.L		e2f4.L		myo5b.S				zdhhc7.L
knl1		lrp12.S		dhrs3.S				sdhd.S
ctps1.L		n4bp3.S		ep300.S				slc25a25.S
hip1.L		usp22 a		g2e3.L				pid1.S
ski.L		pik3ca.S		plpp2.L				mapk1.S
pus10.S		ankrd37.S		ankrd50.L				mfsd8.L
tgif1.L		sipa1l3.L		knl1				c5orf30.S
tcf7l1.L		fam53a.S		ctps1.L				pacsin3.L
arntl.L		nfkbil1.L		hip1.L				ino80d.L
slc43a2.L		muc3a		ski.L				kif7.L
pls3.L		chmp7.L		pus10.S				blm.S
spry1.S		mllt1.L		tgif1.L				mpp5.L
rasl11b.L		diablo.L		tcf7l1.L				brd1.S
LOC108708226		e2f1.L		arntl.L				nup133.L
tnip2.S		rgs3.S		slc43a2.L				klhl32.L
elk4.S		traf3.L		pls3.L				brwd1.L
pkp2.L		leprotl1.S		spry1.S				fkbp6.L
il6st.L		tnfrsf10b.L		rasl11b.L				irf9.S
kifc3.L		tmem57.S		LOC108708226				c14orf166.S
LOC108719541		socs5.S		tnip2.S				figla.L
sesn2.L		lpar1.S		elk4.S				klhl12.L
ephb3.L		atf7ip.S		pkp2.L				ppp2r3b.L
prelid1.S		scnm1.L		il6st.L				ythdf3.S
LOC108695544		sbf2.S		kifc3.L				ncs1.S
cidea.L		fam83g.L		LOC108719541				ncor2.S
fam110c.L		hsd17b7.S		sesn2.L				cdadc1.S
cln3.L		acap3.L		ephb3.L				tmem18.S
LOC100191024		cyld.L		prelid1.S				znf646.L
mllt1.S		grk3		LOC108695544				neu1.L
marcksl1.S		nap1l4.S		cidea.L				hsf2.L
frmd4b.L		ccdc191.L		fam110c.L				ulk2
stx19.L		kcnj5.L		cln3.L				pex6.S
ficd.S		plag1.S		LOC100191024				map4.L
atp1a1.S		kctd9.L		mllt1.S				spen
sox17b.2.L		map3k2.S		marcksl1.S				ankrd9.L
gapdh.S		arhgap18.L		frmd4b.L				mgc75753.S
cyp26a1.S		dact3.S		stx19.L				cep85.S
vav2.L		dcun1d3.S		ficd.S				gpbp1l1.S
larp4b.L		usp44.S		atp1a1.S				kiaa0355.S
zbtb10.S		cse1l.S		sox17b.2.L				arhgef11.L
cdk5r1.S		LOC100489074.L		gapdh.S				med13.S
nodal1.S		ralgapb.L		cyp26a1.S				plekha8.L
bmp4.L		ints6.S		vav2.L				retreg3
usp53.L		gemin5		larp4b.L				ago4.S
m6pr.L		aktip.L		zbtb10.S				ccng2.L
ctc1		ccdc186.L		cdk5r1.S				aadat.S
setd5.L		nr3c1.L		nodal1.S				Xelaev18010890m
ago2.L		def8.S		bmp4.L				daglb.L
pofut2		adamts6.S		hs6st1.L				kif18a.L
lmo4.1.L		atg9a.L		usp53.L				klf2.S
cfap58		adnp2.L		m6pr.L				LOC108705473
nek2.S		baiap2l2.S		ctc1				gpbp1l1.L
sfpq.S		fastkd1.L		setd5.L				pttg1ip.2.L
fosl2.L		pias1.S		ago2.L				mdm2.S
gas1.L		pigc.S		pofut2				Xelaev18025328m
arntl.S		exoc8.S		lmo4.1.L				fam63a.L
sap30.L		zdhhc1.L		cfap58				mrps11.L
ccnj.L		sprtn.S		nek2.S				sike1.L
ventx2.1.S		rpa2.S		sfpq.S				mxd1.L
mlec.L		cyp1a1.S		fosl2.L				nrip1.S
rps3a.L		asphd2.S		gas1.L				ube2z.S
alms1.L		alg6		arntl.S				pias1.L
ptbp1.L		polg.L		sap30.L				cep57.S
ets2.L		usp8.S		ccnj.L				h1foo.L
LOC108695506		def8.L		ventx2.1.S				ndrg4.L
npdc1.1.L		ptprh.S		mlec.L				clic1.L
rhebl1.S		sik2.S		rps3a.L				c5orf15.S
hes6.1.S		tbc1d14.L		alms1.L				det1.L
atp1a1.L		MGC147172.L		ptbp1.L				frmd6.L
rab40c.L		tmem51.L		ets2.L				tmed9.L
ddx17.L		wdr37.L		LOC108695506				kpna2.S
Xetrov90014406m.L		ell.S		npdc1.1.L				cdc42bpb.L
sh3d19.L		haus8.L		rhebl1.S				arid5b.L
smim3.S		lgr4.L		hes6.1.S				map3k9.L
pex13		zfyve9.S		atp1a1.L				senp7.L
arl5c.L		atxn7l1.S		rab40c.L				mau2.L
sgms1.S		cnp.L		ddx17.L				vcpip1.L
hnrnpu		txndc11.L		Xetrov90014406m.L				fkrp.L
loc100495271.S		med13l.S		sh3d19.L				gli2.L
rps6kb1.L		ccdc171		smim3.S				fn3krp.S
snrnp200.L		ei24.S		pex13				znf518a.S
elmo1.S		dnajb14.L		arl5c.L				soga1.L
dhx15.L		slc39a1l.L		sgms1.S				Xelaev18024710m
usp37.S		atf7.S		hnrnpu				mfn2.S
LOC108706589		rlf.S		loc100495271.S				rab7a.S
mfge8.L		plpp5.L		rps6kb1.L				tex264
LOC108710532		kazn.S		snrnp200.L				xrcc6bp1.L
cpsf1.L		trafd1.L		elmo1.S				alg1.L
fzd8.S		rnf112.1.S		dhx15.L				c6orf120.L
LOC108698884		atg4a.S		usp37.S				usp21
irs4.S		nr1d1		LOC108706589				ccser2.S
snrnp200.S		spryd3.L		mfge8.L				satb1.L
spag9.L		tor2a.L		LOC108710532				LOC108703749
bix2.L		golga5.S		cpsf1.L				rbm38.L
LOC108696874		mast4		fzd8.S				wdfy2.S
hp1bp3.L		mtbp.S		LOC108698884				slc17a9.L
svip.S		eda.L		irs4.S				fnip1.L
smarcc2.L		chek1.S		snrnp200.S				insig1.L
rnf38.L		snx13.L		spag9.L				rlim.S
tp53bp2.L		pex12.L		bix2.L				cyth2.L
cxcr4.L		hells.S		LOC108696874				ppp4r1l.L
vmn2r26		rbm24.S		hp1bp3.L				slc35g1.L
c7orf57.L		snx25.L		svip.S				rasa3.L
lpar4.L		gpr75.L		dtx2.L				dedd.L
foxa1.S		b3gnt5.S		smarcc2.L				birc7.L
lpin2.S		sec24b.S		rnf38.L				irf2bp2.L
stam.S		LOC108711716		tp53bp2.L				paqr3.S
srrt.L		commd9		cxcr4.L				insrr.S
MGC68680		LOC108714686		vmn2r26				LOC108695564
psmb3.S		prr14l		c7orf57.L				pcmtd2.L
acbd3.L		ets1.S		lpar4.L				usp31.S
tubb		c11orf96.S		foxa1.S				kdm5b
larp4b.S		MGC83539		lpin2.S				cdc7.L
ylpm1.L		ago1.S		stam.S				pop4.L
fxyd3		smg8.S		srrt.L				smap2.S
acbd3.S		acaca-like.S		MGC68680				icmt.S
uba1.L		fer.L		psmb3.S				dusp19.L
snai1.L		bri3.L		acbd3.L				evi5.S
tcp11l2.S		pde8a		tubb				pdik1l.S
ahnak.L		mfsd14a.S		larp4b.S				oat.1.L
tomm70a.S		loc100216027.L		ylpm1.L				apaf1.L
LOC108715080		osbpl3.L		fxyd3				map7d2
slc4a11.L		atat1.S		acbd3.S				MGC76328.S
stag2		plxnb3.S		uba1.L				lhx5.S
sp5l.L		cyp2r1.L		snai1.L				slc9a1.S
anp32e.L		ddhd1.L		tcp11l2.S				oaf.S
noc4l.S		fam53c.S		ahnak.L				fbxo11.S
tram1.S		ext1.L		tomm70a.S				gid4.S
sptan1.S		peak1.L		LOC108715080				arhgap11a.2.S
slc25a29.S		fut11.L		slc4a11.L				pcdh20.L
srsf4.L		lbh.L		stag2				wasll.S
hnrnpa0.L		arhgef7.L		sp5l.L				galnt1.L
kiaa0247		ccdc3.L		anp32e.L				otud7a.L
ilf3.L		trim8.L		noc4l.S				MGC52683
gsk3a.S		mex3d.L		tram1.S				plcb1.S
arntl2.S		LOC108699404		sptan1.S				pik3r3.L
ubr1.L		arf3.S		slc25a29.S				mrps30.S
zfat.L		wdr59.L		srsf4.L				fbxo33.S
MGC84194		etv3l.S		hnrnpa0.L				cdc37l1.L
cbx5.L		srprb.L		kiaa0247				csk.S
cbs.L		wdr77.S		ilf3.L				dapk1.S
rnf114.L		zfpm1.S		gsk3a.S				hmgcs1.S
rbm47.S		smad2.S		arntl2.S				LOC108709286
mzt1.S		ankrd54.L		ubr1.L				dnajc13.S
notch1.S		zcchc14.S		zfat.L				ephb1.S
rbm12b.1.S		dnajb9.S		MGC84194				nufip1.S
xbp1.L		jade2.L		cbx5.L				mcm10.L
ctbp2l.L		gm29884		cbs.L				fndc3a.S
calr.L		irf2bpl.S		rnf114.L				tmem169.S
yap1.S		cbwd1.1.L		rbm47.S				zfand4.S
auts2		ntmt1.S		mzt1.S				hlcs.L
sdc4.S		pms2.L		notch1.S				tmem185a.S
pin4.L		evc2.L		rbm12b.1.S				slc25a44
MGC83090		chmp1a.S		xbp1.L				hdac2.S
ccnf.S		tmem170a.S		ctbp2l.L				mpi.S
LOC108719569		aldh2.L		calr.L				slc41a1
loc100494818.L		slc30a7.S		yap1.S				tcf20.L
zfand5.S		trps1.L		auts2				fam73a.L
rnf38.S		plch2		sdc4.S				MGC154819
eomes.L		glce.S		pin4.L				ifnar2.S
tubb4b.S		loc100145507.S		MGC83090				znf710.L
aqp11.L		rnf44.L		ccnf.S				mgll.L
krt18.L		socs6.L		LOC108719569				pdzd8.L
fus.L		ccnb2.S		loc100494818.L				slc25a51.S
vapbl.S		tubgcp3.L		zfand5.S				pcmtd1.S
tbcd.L		dync1li2.L		rnf38.S				pak4.L
myo10.2.S		tmem143.S		eomes.L				apitd1.L
znf638.L		sos1.S		tubb4b.S				glt1d1.L
ubap2.L		mink1		aqp11.L				wnk1.L
capzb.L		loc100493164.L		krt18.L				nf1.L
gltscr2.L		ttc8.L		fus.L				arhgap21.S
c6orf62.L		grinl1a.L		vapbl.S				bet1.S
krasl.S		lpar5.S		tbcd.L				MGC115312
h3f3b.L		mitd1.L		myo10.2.S				dgkh-like.S
ddit4.L		LOC108707252		znf638.L				efna4
ovch1.L		LOC108719562		ubap2.L				elk4.L
LOC733563-like.1		abhd13.S		capzb.L				scn1b.S
rpl17.L		rnf138.S		gltscr2.L				rabgef1
lrp6		arhgap20		c6orf62.L				slc25a16.L
wdr11.L		bicc1.S		krasl.S				sat1.L
smarcc1.L		kank1.L		h3f3b.L				zdhhc23.L
prpf39.1.L		saysd1.L		ddit4.L				rab4b.S
ptbp1.S		gsap.L		ovch1.L				tfe3.S
arl13b.L		uspl1.S		LOC733563-like.1				eme1.L
dsp.L		rpap1.S		rpl17.L				nasp.L
phc1.S		chmp1a		lrp6				MGC98819
rnd1.S		vldlr.L		wdr11.L				sipa1l3.S
ift172.L		tmem110.L		smarcc1.L				snx7.S
rpf1.L		cnksr2.L		prpf39.1.L				nedd9.S
sf3a2.S		myo1e.1.L		ptbp1.S				pik3r2.S
gon4l.L		trabd.L		arl13b.L				olfm1.S
prpf8.S		akap10.L		dsp.L				wrap73.L
actr6.L		ccdc69.L		phc1.S				sirt6.L
esyt2.S		c10orf2.L		rnd1.S				LOC398398
chic2.L		slc18a2.L		ift172.L				ston2.S
rxrb.S		gtpbp6.S		rpf1.L				colgalt2
pc.S		dnajb14.S		sf3a2.S				fntb.L
mat2a.L		coq6.L		gon4l.L				rp2.S
galnt2.S		optn.L		prpf8.S				map2k4.L
stag2.L		mos.L		actr6.L				sox3.S
commd4.S		depdc7.S		esyt2.S				aggf1.L
nup188.S		ung.L		chic2.L				lpcat2.S
timm23		rnf149.L		rxrb.S				tbc1d4.S
cdh3.L		tpst2.S		pc.S				vangl2.S
eef2.1.L		fam21a.L		mat2a.L				rnaseh1.L
vdac1.L		kiaa1715.L		galnt2.S				stk17a.S
sf3b2.S		dok1.L		stag2.L				Xelaev18040055m
MGC115585		ncoa7.L		commd4.S				smad9.L
atp1b3.S		itpk1.S		nup188.S				rasa3.S
tpp1.L		mad2l1bp-like.L		timm23				btbd9.S
capn7.L		dock9		cdh3.L				slc25a38
LOC108715635		ammecr1l.L		eef2.1.L				tmem251-b
tceb2.L		tesk2.S		vdac1.L				dsel.L
ubap2.S		slf1.L		sf3b2.S				dop1a
myl12b.S		slf2.L		MGC115585				bcdin3d.L
arhgap17.L		sirt3.2.L		atp1b3.S				rhobtb1.L
eif3a.L		tmtc2.S		tpp1.L				fgfr1.S
alms1.S		etaa1.L		capn7.L				tmem251.L
srrm1.S		tanc1-like.S		LOC108715635				nipa2.S
eprs.L		tspoap1.L		tceb2.L				map1lc3c.L
chst7.S		slc30a5.S		ubap2.S				tmcc3.S
ncl.S		gpr63.L		myl12b.S				abl2.L
smad6.L		myo1e		arhgap17.L				pde6d.L
uba1.S		vldlr.S		eif3a.L				apcdd1.L
hnrnpul2.S		Xelaev18026797m		alms1.S				triobp.S
ccnf.L		ino80d.S		srrm1.S				gtf3c4.L
LOC108699131		fibp.L		eprs.L				otud4.S
fn1.S		fam110b.S		chst7.S				gtf3c2.L
rad21.L		prdx2.L		ncl.S				ercc6l2.L
sertad3.L		zar1l.S		smad6.L				coro6.S
sgsm3.L		atad3a.S		uba1.S				prkcz.S
srsf1.S		rsbn1.L		hnrnpul2.S				cnppd1.S
lima1.S		grhl3.L		ccnf.L				qser1.S
polr1a.L		tle4.S		LOC108699131				fancf.L
srsf11-like.S		atp10b		fn1.S				ctsc.S
prkca.S		c8orf88		rad21.L				zbtb7b.S
ctbp2.S		znf577.S		sertad3.L				ahsa1.L
pdcd11.L		foxh1.L		sgsm3.L				pias3.L
LOC108695505		fam104a.S		srsf1.S				haus2.L
imp4.S		aldh18a1.L		lima1.S				poc1a.L
mapre1.S		dock4		polr1a.L				LOC108714398
htt.L		stmn1.S		srsf11-like.S				znf367.S
dll1.S		aco2.L		prkca.S				dap.L
dnah9.S		ubxn2b.L		ctbp2.S				lhx5.L
LOC108719547		map2k4.S		pdcd11.L				zbtb22.L
skiv2l.L		tnrc6c.L		LOC108695505				klf17.L
zbtb48.L		bcl6.L		imp4.S				mfn2.L
sf1.S		bfar.L		mapre1.S				slc39a10.L
mtmr12.L		tmem181.L		htt.L				pacrgl.L
nek1.L		prmt5.S		dll1.S				pim1.S
myh10		prmt5.L		dnah9.S				anapc10.L
cldn6.1.S		LOC108695571		LOC108719547				usp34.S
ddx27.L		parp15		skiv2l.L				zbed1.L
pabpn1.S		pex11a.L		zbtb48.L				psen2.S
atg16l1.S		uspl1-like.L		sf1.S				nbeal2.S
trip12.S		foxi2.L		mtmr12.L				bnip2.S
cs.L		sema4d		nek1.L				camsap2
MGC115598		itga5.S		myh10				sdhd.L
vars.S		syap1.S		cldn6.1.S				mau2.S
hnrnpk.S		MGC131307		ddx27.L				bcl11b.S
epcam.L		irf2.S		pabpn1.S				siva1.S
ddx21.S		ccnb1.S		atg16l1.S				cdc25a.L
xpc.L		r3hdm4.L		trip12.S				znrf2.S
stx6.S		frmd4a.L		cs.L				ccdc117
cyfip1.L		kazn.L		MGC115598				smad2.L
vcp.S		LOC108709196		vars.S				tmem259.S
gripap1.S		hs3st1		hnrnpk.S				tgfbrap1.S
phrf1.S		plpp6.L		epcam.L				bahcc1.S
anapc1.S		mb21d2.S		ddx21.S				rab40b.S
hnrnpa3.S		thumpd2.L		xpc.L				foxr1.L
tuba4b.L		trappc13.L		stx6.S				mid1.L
son		camsap1.L		cyfip1.L				relb.S
gadd45a.L		ppm1h.L		vcp.S				pik3r3.S
krt18.S		tmem64.L		gripap1.S				trappc4.S
lrpprc.L		aak1.S		phrf1.S				ing2.S
mta2.L		mkl1.S		anapc1.S				loc100216141.L
pmpca.S		Xelaev18011044m		hnrnpa3.S				tmem164.L
dsg2.L		dand5.L		tuba4b.L				popdc3.S
mtss1.2.L		arhgap11a.2.L		son				lamp2.L
ash2l.L		casd1.L		gadd45a.L				arrdc1.S
xnf7.S		mctp2.L		krt18.S				vegfa.S
znf852.L		rassf10.S		lrpprc.L				helq.S
cd2bp2.S		prr14l.L		mta2.L				efna5.L
gnl3.L		kctd3.L		pmpca.S				dtx2.S
arf4		Xelaev18030392m		dsg2.L				gpr22l.S
arfgap3.S		gramd2b.S		mtss1.2.L				stil.L
acly.S		cdc37l1.S		ash2l.L				tmem60.L
pabpc1.S		dsc3.S		xnf7.S				polr2j.L
hnrnpa0.S		rin3.L		znf852.L				slc7a6os.L
smarcd2.L		birc7.S		cd2bp2.S				dolpp1.L
mbtd1.L		tmem259.L		gnl3.L				adamts6
aup1.S		LOC108696212		arf4				mgc69520.S
smarca4.S		klhl17.L		arfgap3.S				spred3.S
nsf.L		helb.L		acly.S				gk.L
pyroxd1.L		bcl6.S		pabpc1.S				morf4l1.L
tdg.S		slc8b1.S		hnrnpa0.S				pisd.L
eif3c.S		cenpl.S		smarcd2.L				loc100491633.L
prcc.L		mpp5.S		mbtd1.L				sema6d.S
ctnnb1.S		map7d3.L		aup1.S				larp6-like.1.S
epcam.S		arhgef17.L		smarca4.S				LOC108716761
dnajc7.S		siah2.L		nsf.L				intu.S
gpcpd1.L		adh5.L		pyroxd1.L				not.L
kiaa0907.L		fam46b.S		tdg.S				bri3.S
srsf1.L		slc25a37.L		eif3c.S				pan3.S
u2surp.S		loc100158305.L		prcc.L				eif6.S
snd1.L		Xelaev18013924m		ctnnb1.S				pak4
casc3.S		ago1.L		epcam.S				foxh1.2.L
p4hb.S		socs6.S		dnajc7.S				fam110a.S
ccne2.L		ikzf4.S		gpcpd1.L				ccdc71l.S
khsrp.S		pgam1.S		kiaa0907.L				ppm1k.S
nop56.L		spopl.S		srsf1.L				fam89a.S
ubtf.S		idh3a.L		u2surp.S				pim3.S
odc1.S		hlf.S		snd1.L				atxn1l.L
rnf40.L		gtf2ird2b		casc3.S				bbs9.L
copb1.S		rab11fip1.S		p4hb.S				lifr.S
ddx23.S		leprot.L		ccne2.L				znf526.S
mtf2.S		myocd.S		khsrp.S				pbx3.S
uroc1.L		cpeb3.S		nop56.L				dtna.L
fkbp15.L		casp9.S		ubtf.S				Xelaev18047698m
srsf6.L		gcnt1.L		odc1.S				mapkbp1.S
dsp.S		styx.L		rnf40.L				slc6a16.S
heatr3		LOC108718425		copb1.S				dlc1.S
anp32e.S		josd1.S		ddx23.S				tvp23a.S
nbn.L		ppargc1b.L		mtf2.S				c15orf39.L
hnrnpab.S		hells.L		uroc1.L				zfp36l1
ppp1cb.L		e2f1.S		fkbp15.L				arf6.L
safb.L		fam53a.L		srsf6.L				gtpbp2.L
kiaa0368.L		klf15.2.L		dsp.S				kdf1.S
crkl.L		rassf3.S		heatr3				larp6-like.1.L
ctr9.S		fhdc1		anp32e.S				rcbtb1.L
fbl.L		rif1.S		nbn.L				tmtc2.L
pwp2.S		disp1.L		hnrnpab.S				samd13.L
sugp2.L		ikzf2.L		ppp1cb.L				rlf.L
atp2a2.S		ring1.S		safb.L				coasy.L
LOC108715139		cbx4.S		kiaa0368.L				Xelaev18026877m
krt8.L		sun1.L		crkl.L				nfe2l2.S
pabpn1.L		hprt1.L		ctr9.S				f2rl1.L
cpsf6.S		katnbl1.L		fbl.L				xzar2
cad.L		fbxo30.L		pwp2.S				lats2.L
sugp1.S		tor1a.S		sugp2.L				ttc39a.L
mfap1.L		cyld.S		atp2a2.S				mapkapk2.L
kif11.S		ppp1r3b.L		LOC108715139				usp8.L
amd1.L		hs3st1.S		krt8.L				fam109a.L
luc7l3.L		fbxo30.S		pabpn1.L				LOC108712684
azin1.S		zfp36l2.2.L		cpsf6.S				slc35e3.S
zfr.L		tubg1.L		cad.L				dnajc16.L
tp53bp1.S		ndel1.L		sugp1.S				mycl.L
myh10.S		ptpn21.L		mfap1.L				tanc2.L
npepl1.S		fbxw9.S		kif11.S				ralgps1.S
ubap2l		tpst2.L		amd1.L				ankrd52.L
trim7.S		klhl13.L		luc7l3.L				snx10.L
actg1.L		nlrx1.L		azin1.S				tesk1
tfdp1.L		sertad2.L		zfr.L				pias4.S
smarcc1.S		fam8a1.L		tp53bp1.S				sema4g.L
cgn.L		b9d2.L		myh10.S				arl10b.L
nat10.L		ndst2.L		npepl1.S				pcyox1l.L
hnrnpm.L		txndc9.L		ubap2l				dnmt1.L
hmgb3.S		wdr60.L		trim7.S				nfkbia.S
elf2.S		adrb3.L		actg1.L				fam193b.S
dhx29.L		cmtm7.S		tfdp1.L				ccdc50
tpp2.L		ncoa6.S		smarcc1.S				trappc13.S
hnrnpul2.L		mob3c.S		cgn.L				kdm5b.S
utp6.L		sik2.L		nat10.L				aff3
nup205.L		plcl2.L		hnrnpm.L				loc100145576.L
vapb.L		Xelaev18021540m		hmgb3.S				sept9.S
bix1.3.L		trak1		elf2.S				ccdc125.S
smc3.S		garem1.S		dhx29.L				cnppd1.L
rnf17.S		tpcn2.L		tpp2.L				rasa2.L
fxr1.S		LOC108708627		hnrnpul2.L				plekhf2.S
anxa7.L		oat.1.S		utp6.L				phf19.S
u2af1.S		pcnt.L		nup205.L				gemin5.L
sf3b1.S		stc1.S		vapb.L				bcl2l12.L
prickle1.S		ccnb1.L		bix1.3.L				cxcl12.L
neurl4.S		dnajb9.L		smc3.S				Xelaev18038453m
ctr9.L		nhlrc3.S		rnf17.S				ppp1cc.L
iws1.S		leprot.S		fxr1.S				orc4.L
thrap3.L		tanc1-like.L		anxa7.L				grm1.S
pabpc1.L		limd2.S		u2af1.S				tmem17.S
sf3a1.L		pcnxl4.L		sf3b1.S				mb21d2.L
nop58.S		btg4.S		prickle1.S				tmem55a.L
ddx21.L		fam134b.S		neurl4.S				Xelaev18038459m
cherp.S		pif1.L		ctr9.L				psme3.S
hnrnph1.S		hes2.L		iws1.S				klhl26.L
smc1a.S		ndel1.S		thrap3.L				sike1.S
pitrm1.L		garem1.L		pabpc1.L				vegfa.L
xnf7.L		rnf103.L		sf3a1.L				ell.L
thoc1.L		klhl13.S		nop58.S				rxra.S
ctnna1.S		LOC108703747		ddx21.L				spdyc.L
lypla2.S		them6.L		cherp.S				Xelaev18032676m
vcp.L		tbp.L		hnrnph1.S				tnfrsf10b.S
cdc42.L		clns1a		smc1a.S				ipmk.L
eif5b-like.S		pou5f3.3.L		pitrm1.L				MGC85210
rpl15.L		rnf149.S		xnf7.L				LOC108718134
sf3b2.L		tbp.S		thoc1.L				gpr45.L
znf207.S		simc1.L		ctnna1.S				fam102a.S
exosc5.L		amot.L		lypla2.S				bnc1.L
fubp1.S		ythdc2.L		vcp.L				mapk1.L
msantd4.S		rpain.S		cdc42.L				fam83d.S
smc1a.L		wdr6.L		eif5b-like.S				crls1.S
xrn1.L		sod2.S		rpl15.L				zbed1
sumo3		c1orf116.L		sf3b2.L				sft2d3.S
msh2.L		plbd2.L		znf207.S				znf554.L
aars.L		arhgap20.L		exosc5.L				bahd1.L
asun.S		cables1.S		fubp1.S				tnks2.S
hnrnph1.L		ptpn3.S		msantd4.S				LOC108699405
dhx8.S		rsbn1l.S		smc1a.L				zbtb8b.L
srrm1.L		ndst2.S		xrn1.L				Xelaev18040086m
aplp2.S		sun1.S		sumo3				mtus1.L
orc3.S		tpgs1.L		msh2.L				rgma.L
pelp1.L		kif13a		aars.L				pacs2.S
nucks1.S		tdrd15.S		asun.S				cdk5r2.S
ddx5.L		fbxo43.L		hnrnph1.L				LOC495407
tcof1.S		pou5f3.3.S		dhx8.S				dgkh
arhgef1.L		ppp1r3b.S		srrm1.L				prpsap2.L
srsf3.S		znrf1.S		aplp2.S				sh2b3.L
dlgap5.S		trim2.L		orc3.S				vmac.L
sumo2.L		btg4.L		pelp1.L				kdm8.L
snrnp70.S		fbxo43.S		nucks1.S				sox3.L
rnf10.S		rsbn1l.L		ddx5.L				bnc1.S
far1.L		mylip.S		tcof1.S				sik1.S
sec23b.S		zfp36l2.1.S		arhgef1.L				LOC108719634
hnrnph3.S		LOC108702912		srsf3.S				LOC108703781
naa35.S		mlh1.S		dlgap5.S				LOC108719531
ywhab.S		kiaa0922.S		sumo2.L				otx1.L
ranbp1.S		tmem131l.L		snrnp70.S				ndrg4.S
npepps.L		cpeb1.S		rnf10.S				syne2.2.S
cog5.L		nhsl1		far1.L				tbcel.S
srp72.S		slc48a1.S		sec23b.S				sod2
set.S		kctd9.S		hnrnph3.S				kcnh5.S
nfyb.L		slc35a1.L		naa35.S				nr1d2.S
gphn.L		ikzf2.S		ywhab.S				wdr37.S
nodal2.L		ccna1.L		ranbp1.S				septin9.L
hsf2.2.L		tnfrsf19.S		npepps.L				ip6k1.L
senp3.L		ssx2ip.L		cog5.L				eif2ak3.S
ywhab.L		cdca7		srp72.S				rnf185.L
nacc1.L		serinc2.L		set.S				gpsm2.L
ppig.L		apc2.L		nfyb.L				trim8
thoc5.L		ssx2ip.S		gphn.L				coq10a.S
ftsj3.L		znf81.L		nodal2.L				paxip1.S
smndc1.L		btg5.1.L		hsf2.2.L				sos1.L
ubb.S		aktip.S		senp3.L				hps6.L
prpf4.L		rspry1.S		ywhab.L				rhog-like.1.L
utp20.L		LOC108717918		nacc1.L				plch1
eprs.S		MGC68639		ppig.L				immp1l.S
iws1.L		znrf1.L		thoc5.L				suox.L
ddx46.L		cat.2.L		ftsj3.L				rab5d.L
sltm.S		s1pr5.L		smndc1.L				ksr1.L
h3f3b.S		akip1		ubb.S				piezo1.S
odc1.L		cpeb1.L		prpf4.L				daglb.S
rpl3l		LOC108705579		utp20.L				s1pr5.S
mybbp1a.L		hes7.1.L		eprs.S				LOC108719889
dot1l.L				iws1.L				plxnb3
ugdh.L				ddx46.L				tshz3.S
wbp11.S				sltm.S				sntg1.L
ilf3.S				h3f3b.S				Xelaev18027767m
rac1.L				odc1.L				tlcd2.L
zbtb2.L				rpl3l				wbp1l.S
carm1.L				mybbp1a.L				ppargc1a.L
uggt1-like.L				dot1l.L				lbh.S
psmc1.L				ugdh.L				slc25a43.L
cbx3.L				wbp11.S				zbtb8b.S
znf326.S				ilf3.S				mbd2.S
ewsr1.S				rac1.L				slc35a5.S
spint2.S				zbtb2.L				tgif2.S
eif4a3.L				carm1.L				prkch.L
cul9.L				uggt1-like.L				ipp.L
eftud2.L				psmc1.L				klf12.S
bms1.L				cbx3.L				lpar1.L
puf60.L				znf326.S				mab21l1.S
myh9.L				ewsr1.S				golga5.L
ywhae.S				spint2.S				znf628.L
impdh1.L				eif4a3.L				pcmtd2.S
ddx4.L				cul9.L				tfrc.L
dda1				eftud2.L				aste1.L
psap.L				bms1.L				mtus1.S
fubp1.L				puf60.L				arhgap40.S
cmpk1.S				myh9.L				gse1.L
atp5b.S				ywhae.S				Xelaev18014426m
copg1.S				impdh1.L				mpv17l2.L
nucks1.L				ddx4.L				thap11
zc3h13.S				dda1				fgfr4.S
nup107.S				psap.L				tfap4.L
dhx15.S				fubp1.L				fam13a.S
eif3a				cmpk1.S				stx11.L
ppil2.S				atp5b.S				slc25a37.S
nol10.L				copg1.S				tmem106b.S
hdac1.S				nucks1.L				dtl.S
anp32a.S				zc3h13.S				plpp6.S
mad1l1.L				nup107.S				klf12.L
azin1.L				dhx15.S				rpa1.L
pcbp2.L				eif3a				bahd1
ezh2.L				ppil2.S				nck2.S
caprin1.S				nol10.L				gnb1l.L
lmnb1.L				hdac1.S				sh2b3.S
glul.S				anp32a.S				LOC108718785
rnf10.L				mad1l1.L				MGC84185
rbm22.S				azin1.L				pde4d-like.S
arf4.S				pcbp2.L				rab27a.S
matr3.S				ezh2.L				mecr.S
sec61a1.L				caprin1.S				rnf44.S
eif2s2.L				lmnb1.L				ccnb2.L
actl6a.S				glul.S				ins
mdc1.L				rnf10.L				rab4b.L
ogdh.L				rbm22.S				uhrf2.L
mcm7.L				arf4.S				med13l.L
khdrbs1.L				matr3.S				avpr2.S
anp32c.L				sec61a1.L				pik3cb.L
rsrc2.L				eif2s2.L				zfyve1
ppp2r1b				actl6a.S				slc4a1.L
suclg2.L				mdc1.L				pdgfb.L
lrrc1.S				ogdh.L				Xelaev18003951m
crkl.S				mcm7.L				Xelaev18009472m
cwc25.S				khdrbs1.L				wdr20.S
hsp90ab5p				anp32c.L				grhl3.L
smu1.S				rsrc2.L				Xelaev18010010m
ppm1g.S				ppp2r1b				ing1.L
rbm14.S				suclg2.L				polr3g.L
gtf2f1.L				lrrc1.S				c11orf96.L
grk5l.L				crkl.S				LOC108703771
maf1.L				cwc25.S				Xelaev18028029m
rnps1.S				hsp90ab5p				csdc2.L
cwc15.S				smu1.S				nfkb2.L
syncrip.S				ppm1g.S				lurap1.S
LOC108719027				rbm14.S				apex2.L
actl6a				gtf2f1.L				ccng1.S
nolc1.L				grk5l.L				rbm38.S
bckdk.S				maf1.L				tlcd2.S
psme4.L				rnps1.S				tada2b.S
tpm3.L				cwc15.S				pced1a.L
jup.S				syncrip.S				rasef.S
dlat.L				LOC108719027				tfeb.S
gpr107.L				actl6a				crtc2.S
alyref.L				nolc1.L				lmo4.2.L
blzf1.S				bckdk.S				hn1.L
mtdh.L				psme4.L				ccndx.S
wdr44.L				tpm3.L				mpp5
aldh6a1.S				jup.S				elmsan1.S
vrk3.L				dlat.L				sh2d4a.S
cldn6.2.L				gpr107.L				LOC108705790
mphosph10.L				alyref.L				anapc10.S
cwf19l1.L				blzf1.S				fzd5.S
ik.L				mtdh.L				nr3c2.S
csnk1a1.L				wdr44.L				adamtsl1
srsf12				aldh6a1.S				fam219b.L
tra2b.L				vrk3.L				pias2.L
ran.S				cldn6.2.L				LOC100496010.S
eif4b.L				mphosph10.L				gpr75.S
dnaja2.S				cwf19l1.L				txnl4b.S
ppp1ca				ik.L				id2.L
tuba1c.L				csnk1a1.L				fgf7.S
cnn3.S				srsf12				arhgap20.S
bzw1.S				tra2b.L				clns1a.L
fcf1.L				ran.S				jade1.S
bsg.L				eif4b.L				pan2.L
snw1.L				dnaja2.S				dync1li2.S
stt3a.L				ppp1ca				spsb1.L
anxa7.S				tuba1c.L				adcy6.L
sf3a3.S				cnn3.S				hs6st3
mms19.L				bzw1.S				hbp1.S
larp7.L				fcf1.L				slc25a38.S
cwc22.S				bsg.L				stxbp6.L
tmco1.S				snw1.L				akap11.L
tpm1.L				stt3a.L				tmem171.L
ythdf1.L				anxa7.S				szl.L
dhx36.S				sf3a3.S				fam13c.S
pds5a.S				mms19.L				atf6b.L
usp10.S				larp7.L				bcor.L
g3bp1.L				cwc22.S				rab20.L
znf706.2.S				tmco1.S				ccdc71l.L
tmpo.L				tpm1.L				arhgap42.S
gnb1.S				ythdf1.L				zdbf2-like.L
ubfd1.L				dhx36.S				klf15.2.S
MGC53795				pds5a.S				fgf7.L
nap1l1.S				usp10.S				slitrk2.S
etf1.S				g3bp1.L				pkd1.L
snd1.S				znf706.2.S				zbtb22.S
lman2.S				tmpo.L				fbxo33.L
lonrf2.L				gnb1.S				rgcc.S
isca1.L				ubfd1.L				nr3c2.L
fnbp1l				MGC53795				nr1d1.L
dusp11.S				nap1l1.S				Xelaev18041239m
chaf1a.S				etf1.S				limk1.L
gpat4.L				snd1.S				arid5b-like.1.S
ykt6.L								ing1.S
zfand6.L								psat1.S
naa15.S								pcmtd1
nol9.L								c14orf79.L
chfr.L								spsb1.S
ppp2ca.S								irf2.L
eml4.L								park7.L
znf335.S								fzd6.L
mastl.L								tm2d3.S
szrd1.S								haus4.L
ipo9.L								dnajc9.L
slc30a1.S								fgfr4.L
mkrn3.L								map4.S
fgf8.L								klf4.L
ptpra.S								rdh13.L
ncoa4.S								begain.L
fam46c.S								nsl1.L
cachd1.S								Xelaev18012848m
ppp1r15b-like.S								h2afj.S
tle1.L								lrriq1.L
atad5.L								acox2.L
per3.S								nkx3-1.L
nckipsd.S								aco2.S
grk6.S								usp15.L
c3orf58.S								c14orf159.L
arpc4.S								fzd1
spag9								ccdc69.S
itpkc.L								szl
vangl2.L								tm2d2.S
usp9x.L								zfpm2.L
cdt1.L								rnf185.S
nos1ap								lfng.S
kctd5.L								rbm24.L
cysrt1								wdr20.L
fam26d.L								foxi1.L
rapgef1.S								fam63b.L
uba3.S								tmem116.L
sos2.L								znf883l.S
med14.L								akap11.S
ahctf1.L								kiaa0141.S
smarcad1.S								loc733728.L
dnajc14.S								hhipl1.S
golga7.S								LOC108697345
bnip3.L								rspry1.L
tlk1.L								hes7.1.S
ash1l								tfrc.S
rad54l								pgam1.L
ppp2r5e.L								nupr1
dgkq.L								mgat3.S
znf821.S								zfpm1
foxm1.S								rrm2b.S
rcor2.L								tpgs1.S
ube2c.L								rsad2.L
maea.S								clcc1
grasp.S								tmem117.S
hmgxb4.S								prdm12.L
bnipl.L								tmem19.L
abhd17a.L								pdgfb.S
sgol1.L								klf2.L
ube2k.L								mef2a.S
diaph3.L								fzd1.L
kdm3b.L								oxr1
phf3.L								bcl2l12.S
zfand6.S								LOC108708333
plpp1.L								foxi2.S
erf.L								Xelaev18013146m
znf618.S								rasl11a.S
lpgat1.S								sema4d.S
slbp.L								htr2c.S
ninl.L								cr1b
mtx2.L								Xelaev18029627m
osbpl8.L								foxi4.2.L
letmd1.L								msx1.L
ccdc28a.S								Xelaev18016928m
eif6.L								tnfrsf19.L
psma7.S								tor3a.L
raph1.L								lrrc40.L
baz1b.L								fzd4
usp9x.S								s1pr5.L
pik3c2a.S								slc39a9-like.1.S
wdr26.S								Xelaev18022505m
c4orf27.L								Xelaev18038404m
rab23.S								btg3.S
cdc42se2-like.1.S								Xelaev18036472m
nde1.S								ccnb5.L
znf574.S								Xelaev18042001m
tuba4.L								LOC108703460
stk26								LOC108710651
cnot11.L
dcbld1.L
zswim1.S
phactr4.S
znf319.S
nfatc3.S
LOC108700013
mthfd2.S
pard3.L
dlg3
tmx4.L
aaas.L
gtpbp1.S
LOC108706563
tnpo2.S
LOC108713924
fam76b.L
tgs1.L
med30.L
ccdc68.S
cep57l1.L
pten.S
myo9b.S
snx9.S
LOC108719340
poldip2.S
fbxo45.S
efcab14.S
cachd1.L
alkbh5.S
cdan1.L
shprh.S
clk1.L
nvl.L
snx30.L
nlk.S
ppp2r1a.L
gtdc1.S
pip5k1a
ivns1abp.S
mal2.S
adpgk.L
slc12a6.S
fdx1l.L
suv39h2.S
chmp4c.S
raver1.S
mrps25.S
atg101.S
ptgfrn.S
efhd1.L
ctdspl.L
emc8.S
dlg1
rabgef1.S
traf7.S
ccdc94.L
fam69a.S
slc35e1.L
cisd1.L
kansl1
map4k4-like.S
mcm3ap.L
hpcal1.L
LOC108700255
arfgap1.S
atg101.L
mybl2.S
cited4.S
dhdds.L
tle1
kpna3.L
trmt6.S
impad1.S
asap2.L
bnip3.S
ddx3x.S
ccnyl1.L
tmem189.L
znf585a
mcph1.S
znf423.L
yae1d1.L
pgam5.L
hspa5.S
dazap2.S
smarca5
dgcr2.L
zcchc11.S
uxs1.S
prkcsh.L
cers3.L
pigc.L
usp47.S
ints5.L
insig2.L
rnf11.S
clic1.S
rapgef6.S
ankrd12.S
atxn7.S
plin2.S
gng10.L
ano1.L
ywhag.L
ndor1.L
setd1a.S
adgrl2.L
pkn2.S
atp10d.L
r3hdm1.L
xylt2.L
pxn.L
zdhhc20.L
immp1l.L
ovca2.S
srebf2.S
rala.L
habp4.S
wdr24.L
ocrl.S
fem1c.L
etv6.L
traip.L
arl9.L
thumpd3.L
dag1.L
morc2.L
hspbap1.L
slc35f5.L
znf292.L
rab27b.L
cenpi.L
jmjd1c.S
smad4.2.L
abhd17a.S
samd4b.S
ctdnep1.L
hyls1.S
znf395.L
cnot8.L
blcap.S
snx1.S
mzt2b
znf865.L
gpsm2.S
senp1.S
triobp.L
aamp.L
vcpip1.S
zdhhc14
c19orf44.L
ttc4.L
ccnh.L
hyal2.S
chd8.S
tdgf1.3.L
cep97.L
tmem209.S
mov10l1.L
dnajb12.S
fmn2.L
ctdsp2.L
zbtb8a.1.S
cep192.L
ap1m2.S
hist1h2aa.L
spire2.S
fam222b.L
LOC108719552
tnrc6b.S
stx2.L
fastkd3.L
tjp3.S
lrrk1.L
ammecr1l.S
med18.S
asl.L
rab8b.S
MGC97820.L
kpna4.S
selenon.L
LOC108719514
zswim9
samd4a.L
setd1a.L
rnf41.L
tox4.S
cbll1.S
cep295.S
grasp.L
fnbp1l.L
znf646.S
mcm3.L
taok3.S
ptp4a1.S
phf23.L
fam193b.L
hipk3.S
zfyve27
LOC108705694
kat2b
fam110a.L
LOC108703815
rpa3.S
rnf130.S
LOC108712891
stk24.S
foxn2.S
marveld3.L
tctn2.L
homez.L
wdr47.S
fcho1.S
ifngr2
zbtb41.L
edc3.S
ikbkg.L
braf.L
cep350.L
twsg1.S
dapl1.S
mrps16.L
snx27.S
pphln1.L
cpeb2-like.L
dcun1d5.L
exosc6.L
ankrd12.L
fam174b.S
wdr81.L
rab33b.S
cenpn.S
mmaa.L
osbpl3.S
tmem110.S
xpo4.L
znf391
slc30a2.L
LOC108703993
r3hcc1l.L
slc25a36.S
src.L
atxn7l1.L
smn2.S
mbip.L
camkk1
dcaf1.L
amotl1.S
rassf3.L
mef2d.S
styx.S
mns1.L
wdr45.S
usp37.L
ppp2r1a
ubap1.S
zmynd19.S
spg11.L
wasf3.L
acvr1b.S
hipk3.L
tspan15.L
fam222b.S
csk.L
mia3-like.1.L
hinfp.S
smap2.L
phf3.S
rell1.L
specc1l.S
neo1.S
tnrc6b.L
fez2.L
sik3.L
adam17.L
asxl3.S
pou2f1.L
rai1.L
peli1.S
oraov1.S
oaz2
map3k10.L
wdr89.L
cdca2-like.S
tollip.S
eif2ak1.L
wnk3.L
tyro3.L
sesn2.S
id2.S
pxn.S
zfp91.S
maz
kif1b.L
pard3.S
impad1.L
chst12.L
kpna2.L
ctsd.S
mnt.S
rest.L
plin2.L
rab13.L
taf5l.L
ncor1.S
shank2.L
azi2
cab39l.L
gemin2.S
smtnl2.S
lrrc58.L
LOC108719553
acvr2b.S
rbpj.L
[truncated: 1,266 more rows]

## Sheet: St10.5-11
List of all genes from the venn diagrams of genes temporally differentially expressed in endoderm and mesoderm lineages corresponding with figure 5B
Total				Increase				Decrease
Endo Only	Meso Only	Overlap		Endo Only	Meso Only	Overlap		Endo Only	Meso Only	Overlap
frzb2.L	hoxd1.S	apobec2.L		frzb2.L	hoxd1.S	apobec2.L		csrp2bp.L	ppfia1.L	cask.L
adamts18.L	hes5_X2.S	msgn1.L		adamts18.L	hes5_X2.S	msgn1.L		utrn.L	ints12.L	mark2.S
vax2.L	hes5_X1.L	kcnk6.S		vax2.L	hes5_X1.L	kcnk6.S		nol12.S	mfsd5.S	snx17
LOC108701275	val.L	foxc2.L		LOC108701275	val.L	foxc2.L		cdv3.L	uap1.S	coq10a.L
nell2.L	myom3.L	frzb.S		nell2.L	myom3.L	frzb.S		klf8.L	gmnn.S	ecsit.S
mmrn2.L	wnt8a.L	rbm20.S		mmrn2.L	wnt8a.L	rbm20.S		yod1.L	rce1.S	golim4.S
irx3.S	t2.S	foxc1.S		irx3.S	t2.S	foxc1.S		idh1.S	znf182	shkbp1.L
mpo.S	crabp2.S	rbm20.L		mpo.S	crabp2.S	rbm20.L		aaas.L	LOC108695585	pdzd2.S
meox2.S	prrt3-like.L	a2m.S		meox2.S	prrt3-like.L	a2m.S		usp25.L	pcdh1.S	flna
LOC108708140	hoxd1.L	LOC108704696		LOC108708140	hoxd1.L	LOC108704696		arfgef2-like.L	luzp1.S	plekha5
mmrn2.S	osr2.L	kcnk6.L		mmrn2.S	osr2.L	kcnk6.L		znf585a	map4k4-like.L	MGC115657
LOC108698145	gnaz.S	gprc5b.L		LOC108698145	gnaz.S	gprc5b.L		ppp4r3b.L	brd8.S	tor1b.S
cer1	hes5.9.S	errfi1.L		cer1	hes5.9.S	errfi1.L		gna13.S	ctdsp1	ccdc158
Xelaev18014608m	evx1.L	rassf1.L		Xelaev18014608m	evx1.L	rassf1.L		snx5.S	anapc13.1.L	tubg1.S
LOC108701270	slc7a7.S	tbx20.L		LOC108701270	slc7a7.S	tbx20.L		dapk3.S	MGC115291	ralb.L
ptprq.S	Xelaev18039917m	comt.2.S		ptprq.S	Xelaev18039917m	comt.2.S		mettl16.L	mex3a.L	cep120.L
dmbx1.L	fam3d.S	crabp2.L		dmbx1.L	fam3d.S	crabp2.L		cct6a.S	optn.S	ubtd2.S
prr18.S	map3k12.S	slc5a8.L		prr18.S	map3k12.S	slc5a8.L		pdpr.S	gcnt3.S	pdcd6.L
loc548390.L	hes9.1.S	gata6.L		loc548390.L	hes9.1.S	gata6.L		nras.L	gls.L	rhobtb2
dmbx1.S	fucolectin.S	onecut1.2.S		dmbx1.S	fucolectin.S	onecut1.2.S		mybl2.S	tmem230.L	znf234.L
LOC108700135	pnck.S	pvrl1-like.2.S		LOC108700135	pnck.S	pvrl1-like.2.S		dusp11.S	pid1.L	znf684.S
kcnk10.L	dpysl4	id4.S		kcnk10.L	dpysl4	id4.S		alg10.S	LOC108695561	zswim1.S
gypc.L	umod.2.L	trpv5.L		gypc.L	umod.2.L	trpv5.L		mdm1.L	parpbp.S	plxnb2.S
slc28a3.L	ripply3.L	LOC398451		slc28a3.L	ripply3.L	LOC398451		taf5.L	tmem39b.L	tcf19.L
Xelaev18009016m	rab3d.L	p2ry11.L		Xelaev18009016m	rab3d.L	p2ry11.L		map4k5	loc100158433.L	prss16.L
LOC108715837	antxr2.S	t.L		LOC108715837	antxr2.S	t.L		LOC108713105	lrp1.L	haus3.L
prdm12	prss23.S	LOC108704134		prdm12	prss23.S	LOC108704134		etv1.S	cry-dash.L	lin9.L
ntn3.S	tp73.L	tll1.S		ntn3.S	tp73.L	tll1.S		hyal2.L	zmynd19.L	abr.S
arhgap9.L	hes9-1.L	fgf16		arhgap9.L	hes9-1.L	fgf16		LOC108701074	pgm2l1	slc35c1.S
LOC108706139	vill.S	spry4.L		LOC108706139	vill.S	spry4.L		znf239	dgkq.L	cdc20.L
adamts5.S	vtcn1.L	post5.S		adamts5.S	vtcn1.L	post5.S		sec24d.S	c2orf49.S	dip2b
LOC108702987	efcc1.S	sp5.L		LOC108702987	efcc1.S	sp5.L		golga4.L	snx7.L	ubr5.L
myo10.S	theg-like.S	tll1-like.1.L		myo10.S	theg-like.S	tll1-like.1.L		Xelaev18034023m	dgkz	tpcn1.L
slc16a10.S	krt12.L	irx3.L		slc16a10.S	krt12.L	irx3.L		ppm1d	srgap2.S	znf704
col3a1.S	krt12.S	tead4.L		col3a1.S	krt12.S	tead4.L		irf5.L	rab31.L	pard3.L
cer1.S	mcidas.L	arhgap27.S		cer1.S	mcidas.L	arhgap27.S		dck.1.L	LOC108695555	tctn2.L
foxe3.S	Xelaev18041737m	rab34.L		foxe3.S	Xelaev18041737m	rab34.L		ddx56.L	cntrl.L	igf2r.L
tbx22.L	btc.S	gne.S		tbx22.L	btc.S	gne.S		cask.S	myo10.2.L	mef2d.S
tmem150b.S	fam83c.L	spry4.S		tmem150b.S	fam83c.L	spry4.S		rab14.S	dcaf10.S	tnrc6b.L
tac1.L	clcnkb	st6galnac2.S		tac1.L	clcnkb	st6galnac2.S		spag1.S	znf367.S	LOC108718446
LOC108716719	Xelaev18045499m	fhl3.L		LOC108716719	Xelaev18045499m	fhl3.L		cnnm2.L	nfxl1.L	ubr2.L
gal3st4.5.L	lef1.L	ppp1r18		gal3st4.5.L	lef1.L	ppp1r18		ppp3ca.L	dcp1a.S	pign.S
adgrl4.S	irf5.S	post.L		adgrl4.S	irf5.S	post.L		dock5.L	LOC108719517	LOC108719533
ca7.L	xk81a1.S	mettl7a.2.L		ca7.L	xk81a1.S	mettl7a.2.L		actn4.S	ttbk2.S	slmap.L
nwd2	LOC100486385.L	post7p.L		nwd2	LOC100486385.L	post7p.L		rad54l	slc15a4.L	alg12.L
tlr8	cdx2.S	nrp2.S		tlr8	cdx2.S	nrp2.S		ythdf3.L	pik3ca.S	shf.L
pcca	zc3h12c.L	pnhd.S		pcca	zc3h12c.L	pnhd.S		tulp4.L	mapkapk5.S	zfp661
Xetrov90000618m.S	gnb3.S	fcn1		Xetrov90000618m.S	gnb3.S	fcn1		myo9b.L	map3k8.L	kmt2b
LOC108719061	ablim1.S	syne3.L		LOC108719061	ablim1.S	syne3.L		nploc4.L	ctif.L	ptpra.S
hnf1b.S	hes5_X2.L	LOC108714317		hnf1b.S	hes5_X2.L	LOC108714317		pdpr.L	bet1.S	ccdc88a
LOC108699247	ccn1l.S	post10.L		LOC108699247	ccn1l.S	post10.L		lman2.S	ncor2.S	bdp1.S
dhrs3.L	nek2.L	hpgd.S		dhrs3.L	nek2.L	hpgd.S		eif4g1.S	setd4.L	zcchc11.S
onecut1	amotl1.L	ddit3.L		onecut1	amotl1.L	ddit3.L		vps13a.L	zic2.S	rassf3.S
gpx3.S	trim29.S	gfpt1.S		gpx3.S	trim29.S	gfpt1.S		cxcr4.L	grin2b.S	dbf4b.L
aldh1a3.S	lsp1.L	Xelaev18022168m		aldh1a3.S	lsp1.L	Xelaev18022168m		strn	mis18a.L	rnf130.S
dnah7.L	mfsd2a.L	Xelaev18038969m		dnah7.L	mfsd2a.L	Xelaev18038969m		osbpl8.L	LOC108716296	tmem131.L
nkx2-4.L	pygm.L	dedd2.L		nkx2-4.L	pygm.L	dedd2.L		brpf3.S	itga5.S	gab2.L
nck2.L	glipr2.S	stard4.L		nck2.L	glipr2.S	stard4.L		cpd.S	xrcc2.L	pcyox1.L
gad1.1.S	LOC108709394	myod1.S		gad1.1.S	LOC108709394	myod1.S		ppp4r3a.S	mcf2l	spty2d1.S
alpl.S	prss23	capn8.1.S		alpl.S	prss23	capn8.1.S		hmces.L	rad51d.L	gtf2ird1.S
slc4a2.S	eya1.S	blvra.L		slc4a2.S	gata2.L	blvra.L		stag1.L	MGC115585	dcp1a
six1.L	ano9.L	gatm.L		six1.L	eya1.S	gatm.L		tm9sf1.S	cdadc1.S	madd.S
slc5a8	arhgef3.2.L	LOC108695829		slc5a8	ano9.L	LOC108695829		ccnh.L	sbk1.L	jmjd4.L
igfbp2	sult6b1.5.L	pygm.S		igfbp2	arhgef3.2.L	pygm.S		lca5.L	cttn.L	zfyve28-like.1.S
dkk1.L	slc44a3.L	itpka		dkk1.L	sult6b1.5.L	itpka		naa15.L	LOC108704260	gpkow.L
cdh11.L	fcgbp	dlc1		cdh11.L	slc44a3.L	dlc1		pkd2.L	plpp5.L	smn2.S
crb2.S	mov10	rspo2.L		crb2.S	fcgbp	rspo2.L		znf407.L	madd.L	asap2.S
LOC108700818	krt15	gata2.S		LOC108700818	mov10	gata2.S		rnf121.L	dnajb14.L	sgms1.L
gnrh2.L	znf185.L	naalad2.S		gnrh2.L	krt15	naalad2.S		ncald.L	LOC108696623	lipe.L
gjb2.L	arhgap6	bmp7.1.S		gjb2.L	znf185.L	bmp7.1.S		slmap.S	socs4.L	siva1.L
sim2.L	figf.L	mars2		sim2.L	arhgap6	mars2		map7d1.S	LOC108708488	mb21d2.L
prdm1.S	kiaa1217.S	pnhd.L		prdm1.S	figf.L	pnhd.L		pds5b.S	tigd5	wwp1.S
LOC108714374	lypd6b.L	lin28a.S		LOC108714374	kiaa1217.S	lin28a.S		prc1.S	arhgap32.S	rfwd2.S
irx1.L	rdd4.L	capn8.S		irx1.L	lypd6b.L	capn8.S		rbm27.S	nxpe3.S	fez2.L
gad1.1.L	Xelaev18018282m	errfi1.S		gad1.1.L	rdd4.L	errfi1.S		bag4.S	zic2.L	spice1.L
ucn1.S	LOC108717439	LOC108709519		ucn1.S	Xelaev18018282m	LOC108709519		wdr26.S	tmem110.L	efcab14.L
nr4a2.S	slc9a3r2.L	itgb8.L		nr4a2.S	LOC108717439	lsp1.S		flii.S	cebpb.S	git2.L
angpt2.L	dhcr7.L	lsp1.S		angpt2.L	slc9a3r2.L	hspg2.L		atg2b.L	LOC108701404	arhgap35.L
darmin.L	nxpe2.L	hspg2.L		darmin.L	dhcr7.L	npnt.S		pard6b.L	fryl.L	agap1.L
frzb-1	dlx2.S	npnt.S		frzb-1	nxpe2.L	lamb3.S		ykt6.L	gpr83	hells.S
foxc2.S	sept5.L	lamb3.S		foxc2.S	dlx2.S	msx2.L		shroom4.L	rnf112.1.S	fam20b.S
mmel1.L	lrrn1.L	msx2.L		mmel1.L	sept5.L	slc6a8.S		atr.L	mrps11.L	usp22 a
LOC100189574	cdc14a.L	slc6a8.S		LOC100189574	lrrn1.L	zeb2.S		man2a1.S	sowahc.L	rnf19b.S
LOC108711758	myc.L	zeb2.S		LOC108711758	cdc14a.L	msx2.S		cdc16.L	Xelaev18047576m	snx13.S
slc3a1.L	zc3h12c.S	msx2.S		slc3a1.L	myc.L	arl4c.S		c5orf28.L	LOC108714950	fam53c.S
thbs4.S	tnni2.L	arl4c.S		thbs4.S	zc3h12c.S	Xetrov90026715m.L		rab23.S	mapkbp1.S	ralgapb.L
matn4.S	atp8b3.L	Xetrov90026715m.L		matn4.S	tnni2.L	bmper.L		mast3.L	meis3.L	slc9b2.S
srl	cdx2.L	bmper.L		srl	atp8b3.L	dynll1.L		gnl1.S	LOC108719547	pik3r2.L
pcdh15	post9p.L	dynll1.L		pcdh15	cdx2.L	nipal2.L		katnb1.S	nr1i2.S	rapgef6.S
LOC101027296	lox.L	nipal2.L		LOC101027296	post9p.L	slc29a3.L		pcnx1	pcgf2.L	spire2.L
admp.L	rab25.L	slc29a3.L		admp.L	lox.L	capn8.2.L		loc100158477.L	fam110c.S	atat1.S
slc12a3.2.S	tmem138.L	capn8.2.L		slc12a3.2.S	rab25.L	gfpt1.L		nsun7.S	zic1.L	prkch.L
htr3b.L	gdpd1.L	gfpt1.L		htr3b.L	tmem138.L	apcdd1.S		mob1a	LOC108719063	tmem51.L
trpc6	s100a2	apcdd1.S		trpc6	gdpd1.L	mybpc2.L		traf7.S	tdgf1.1.L	zdhhc7.S
LOC108695296	sspo.L	mybpc2.L		LOC108695296	s100a2	LOC108704672		lasp1	chst8.L	pias3.S
LOC100487423.L	krt5.7.S	LOC108704672		LOC100487423.L	sspo.L	tpbg.L		kif14.L	nedd9.S	LOC108706563
arx.S	kiaa1614.L	tpbg.L		arx.S	krt5.7.S	rreb1.L		arfgef1	Xelaev18039004m	rnf217.L
il10.L	cdx1.S	rreb1.L		il10.L	kiaa1614.L	LOC108716735		naa16-like.L	anapc10.S	cog1.S
LOC108701312	esrrg.S	LOC108716735		LOC108701312	cdx1.S	trim29.L		plin2.S	pdgfrl.2.L	fam189a1.S
il1r1.S	slc45a3.L	trim29.L		il1r1.S	esrrg.S	tcf12.L		nudt4.S	foxh1.S	ralgapa1.S
gata3.L	eps8l2.S	tcf12.L		gata3.L	slc45a3.L	cdk1.S		kif21a.L	LOC108719562	rassf2.L
LOC108701980	Xelaev18027269m	cdk1.S		LOC108701980	eps8l2.S	dhcr7.S		ift122.L	LOC108704294	kdm5c.S
bhlhe41	znf474.S	dhcr7.S		bhlhe41	Xelaev18027269m	eif4a2.L		desi2.S	gli1.S	mylip.S
fgfr4.S	bicd1	eif4a2.L		fgfr4.S	znf474.S	arrdc3.L		slc30a2.L	znf33a.L	heatr5a.L
irx2.L	mboat1.L	arrdc3.L		irx2.L	bicd1	lin28a.L		pop1-like.L	h2afj.S	ate1.L
meis1.L	pnp.L	lin28a.L		meis1.L	mboat1.L	dnase1l3		cdkn2aip.L	LOC108697345	xpo6.L
Xelaev18015877m	syt8.L	dnase1l3		Xelaev18015877m	pnp.L	caprin2.S		atl2.L	lratd1	sec22a.L
cdh6.S	fut6.S	caprin2.S		cdh6.S	syt8.L	alg2.L		cysrt1	fosl1.L	wdr37.L
gramd1a.S	otog.L	alg2.L		gramd1a.S	fut6.S	bmp7.1.L		pkn2.L	foxi2.L	borcs6.S
LOC101735011.L	paqr8.L	bmp7.1.L		LOC101735011.L	otog.L	gli3.L		nradd.L	socs1.S	slc25a36.S
sfrp2.L	krt.L	gli3.L		sfrp2.L	paqr8.L	bcor.L		fcho2.S	Xelaev18038459m	mtss1.1.S
slc3a1.S	pdlim4.L	bcor.L		slc3a1.S	krt.L	tubb4b.L		pten.S	itgb8.L	phkg2.L
foxb1.L	slc30a10.S	tubb4b.L		foxb1.L	pdlim4.L	dleu7.L		sbf1.L	socs3.L	cebpg.L
arx.L	ccdc151.L	dleu7.L		arx.L	slc30a10.S	eef1a1.L		usp54.L	hes7.1.L	tprn
kmo.L	phox2a	eef1a1.L		kmo.L	ccdc151.L	cpe.L		katnb1.L		stub1.S
fgfr4.L	amotl2.S	cpe.L		fgfr4.L	phox2a	cks1b.S		mia3		dus4l.L
kng1.L	xk81a1.L	cks1b.S		kng1.L	amotl2.S	top2b.S		xylt2.L		slc20a2.L
LOC108705874	msi1.S	top2b.S		LOC108705874	xk81a1.L	dynll1.S		ccdc68.S		pex12.L
fbn3.S	epas1.S	dynll1.S		fbn3.S	msi1.S	proser1.S		r3hcc1l.L		picalm.1.S
abcb5	sh3d21.L	proser1.S		abcb5	epas1.S	ldb1.S		adam10.S		loc733556.L
nlrc4.L	LOC100496293.L	ldb1.S		nlrc4.L	sh3d21.L	ccnb3.S		zmym4.L		c14orf166.S
dkk1.S	pkp3.S	ccnb3.S		dkk1.S	LOC100496293.L	sebox.L		gpn2.S		aebp2.S
fst.S	rpe65.S	zic2.S		fst.S	pkp3.S	tjp2		inpp5a.1.L		tank.L
slc12a3	emp2.L	sebox.L		slc12a3	rpe65.S	LOC108710484		rnf121.S		Xelaev18011044m
meox2.L	dlx3.L	tjp2		meox2.L	emp2.L	rarg.L		llgl1.S		dgke.S
trim54.L	LOC108708348	LOC108710484		trim54.L	dlx3.L	p4hb.L		clasp1.S		trpv4.L
il1b.S	nr6a1.L	rarg.L		il1b.S	LOC108708348	atp1b1.S		dpy19l1.L		scap.L
iqca1.L	shroom3.L	p4hb.L		iqca1.L	nr6a1.L	itga6.S		ptdss2.S		arv1.S
ctnna2	mab21l3.S	atp1b1.S		ctnna2	shroom3.L	tuba3c.S		nnt.S		poc5.L
LOC108714422	LOC108711244	itga6.S		LOC108714422	mab21l3.S	gne.L		Xelaev18028646m		loc100493164.L
Xelaev18031226m	msx1.L	tuba3c.S		Xelaev18031226m	LOC108711244	wnt8a.S		bod1l1		LOC108708787
foxc1.L	ablim1	gne.L		foxc1.L	styk1.S	LOC108719789		zmym4.S		bcar3.L
ntrk2.S	kctd15.S	wnt8a.S		ntrk2.S	msx1.L	arpc3.L		kcnab2.L		mtmr10.L
irx5.L	tsku.S	LOC108719789		irx5.L	ablim1	zfand5.S		trim39		xpo6.S
znf385b.L	slc22a4.L	arpc3.L		znf385b.L	kctd15.S	LOC108713945		mospd2.S		loc100216027.L
LOC108716401	cbr1.1.L	zfand5.S		LOC108716401	tsku.S	ptmap12.S		eri1.L		capn15.L
dhrs3.S	LOC108719420	LOC108713945		dhrs3.S	slc22a4.L	amotl2.L		prkaa1.S		plxnb2.L
LOC108701392	rbm38.S	ptmap12.S		LOC108701392	cbr1.1.L	yeats4.L		ptpn23.S		pigc.S
foxd2.S	dlx3.S	amotl2.L		foxd2.S	LOC108719420	vash2.S		map7d2.S		slc25a16.L
igf2.S	ptk2b.S	yeats4.L		igf2.S	rbm38.S	pcdh8.2.L		ppm1e.S		mef2d.L
nrp2.L	Xelaev18003060m	vash2.S		nrp2.L	dlx3.S	cbx1.S		pigs.L		slc25a46.L
ccl19.L	c2orf68.L	pcdh8.2.L		ccl19.L	ptk2b.S	Xelaev18000128m		fam91a1.L		cbwd1.1.L
ptprb.L	LOC100486385.S	cbx1.S		ptprb.L	Xelaev18003060m	aim1l.L		znf609.S		tbc1d9
adgrb2.S	efhc1.L	Xelaev18000128m		adgrb2.S	c2orf68.L	hnrnpr.L		pard3.S		usp34.L
ggt5.L	rnf165.S	aim1l.L		ggt5.L	LOC100486385.S	herpud1.L		grk5.S		LOC100490741.L
LOC108698356	epn3.L	hnrnpr.L		LOC108698356	efhc1.L	znf282		LOC100653495		slc15a4.S
nipal2.S	lpar2.L	herpud1.L		nipal2.S	kctd15.L	creb1.S		ptpn12.L		stk35.S
inpp5e-like.S	MGC52622	znf282		inpp5e-like.S	rnf165.S	xkr5.L		itsn2.L		cfap97.L
serpinb10.S	gpr143.S	creb1.S		serpinb10.S	epn3.L	lrwd1.L		usp53.L		fastkd1.L
cdc14a.S	tusc2.S	xkr5.L		cdc14a.S	lpar2.L	znf740.S		znf850		klhdc10
Xelaev18011723m	ubald2.L	lrwd1.L		Xelaev18011723m	MGC52622	has1.S		dr1.L		rapgef1.L
Xelaev18033386m	klhl25.L	zic2.L		Xelaev18033386m	lmo4.2.S	rps21.S		rraga.S		bptf.L
etv2.S	znf644.L	znf740.S		etv2.S	gpr143.S	pars2.L		trim3.L		MGC85180
phka2-like.S	zbtb46.S	has1.S		phka2-like.S	tusc2.S	lhx1.S		stim2.S		herc1.L
neto1.S	cdh26.S	rps21.S		neto1.S	ubald2.L	akap12.S		tsc22d1.L		LOC108714033
nkx2-3.S	MGC83169	pars2.L		nkx2-3.S	klhl25.L	mettl7a.L		whamm.L		prrg1.L
xarp.L	b4galnt3.L	lhx1.S		xarp.L	znf644.L	chd2.L		tmem62.S		asphd2.L
LOC108696971	slc9a2	akap12.S		LOC108696971	zbtb46.S	polr2h.L		ivns1abp.L		arhgap11a.2.S
gngt2.1.L	pprc1	mettl7a.L		gngt2.1.L	shroom4.L	smo.L		tubgcp3.S		pid1.S
frem1	tgif1.L	chd2.L		frem1	cdh26.S	hspbp1.L		golph3l.L		nlk.L
hmcn2	LOC108717200	polr2h.L		hmcn2	MGC83169	atf4.S		ubn2.S		tgds.S
arhgef38.S	pvrl4.S	smo.L		arhgef38.S	b4galnt3.L	c2cd2.S		wdfy1		rnf8.L
abca1.S	MGC80993	hspbp1.L		abca1.S	slc9a2	cdca3.L		mtx2.L		znf577.S
LOC108714284	fam177b.L	atf4.S		LOC108714284	pprc1	lrig2.L		ube2k.L		crtc3.S
fam83b.L	sphk2.S	c2cd2.S		fam83b.L	tgif1.L	xetrov90011961m.L		slitrk5.S		taf4b.S
dennd2a.L	degs3.L	cdca3.L		dennd2a.L	LOC108717200	hpgd.L		cog3.L		capn15.S
cntn1.S	fzd3.L	lrig2.L		cntn1.S	pvrl4.S	herpud1.S		ccna2.S		sbf2.L
prdm14.L	LOC108700036	xetrov90011961m.L		prdm14.L	MGC80993	trpm4		smc6.L		spopl.S
gata5.L	tnfsf10l.L	hpgd.L		gata5.L	fam177b.L	has-rs.S		abhd16a.L		arhgap21.L
LOC108718210	fer1l4	herpud1.S		LOC108718210	sphk2.S	LOC108715172		cul4b.S		Xelaev18024710m
ncmap.S	gmps.L	trpm4		ncmap.S	degs3.L	fzd3.S		smagp.S		gatsl3.L
cyp27b1.L	Xetrov90014299m.L	has-rs.S		cyp27b1.L	fzd3.L	golm1.L		Xelaev18000337m		usp34.S
Xelaev18012290m	slc7a4.L	LOC108715172		Xelaev18012290m	LOC108700036	lamb1.S		rrm2.2.S		rnf19b.L
fkbp9.S	specc1l	fzd3.S		fkbp9.S	tnfsf10l.L	lrp2.L		wapl.S		rad51c.L
cmtm3.L	ube2n.L	golm1.L		cmtm3.L	fer1l4	rgs2.L		st3gal3.S		dnajc13.L
pcdhac2.L	klf11.S	lamb1.S		pcdhac2.L	gmps.L	tdg.S		rragc.L		ankrd52.S
vwf.L	upk3b.L	lrp2.L		vwf.L	Xetrov90014299m.L	LOC108715921		csnk1g3.L		lhfpl2.S
LOC108704005	scnn1a.L	rgs2.L		LOC108704005	slc7a4.L	rbms2.S		clcn7.L		rilp.S
fyb.S	dgkd-like.L	tdg.S		fyb.S	specc1l	top2a.L		exosc6.L		aak1.S
caskin2.L	Xelaev18006613m	LOC108715921		caskin2.L	ube2n.L	rbmx.L		cchcr1.L		kiaa0586.L
trabd2a	gnb3.L	rbms2.S		trabd2a	klf11.S	ift46.L		ncln.S		etv6.S
diras3.L	gpatch4.S	top2a.L		diras3.L	upk3b.L	hnrnpa1.S		dars2.L		kazn.L
lmo1.L	Xelaev18017809m	rbmx.L		lmo1.L	scnn1a.L	leng8.L		tbc1d22b.S		polg.L
manea.S	ndufv2.L	ift46.L		manea.S	dgkd-like.L	rps9.L		dgcr8		dcaf12.L
slc34a2.S	LOC108701168	hnrnpa1.S		slc34a2.S	Xelaev18006613m	LOC108711131		mycl.S		tmcc2.S
arhgap4.L	rps6ka4.L	leng8.L		arhgap4.L	gnb3.L	efs.S		ulk4.L		mid1.S
tmem150b.L	efcab6	rps9.L		tmem150b.L	gpatch4.S	ist1		mpp6.L		mgll.L
cnrip1.L	kpna2.S	LOC108711131		cnrip1.L	Xelaev18017809m	cpne3.L		cdc14b.S		fryl.S
sfrp2.S	rhbdl3	efs.S		sfrp2.S	ndufv2.L	cdc34.S		golga2.S		fry.L
hoxa7.L	lrrn1.S	ist1		hoxa7.L	LOC108701168	sf3b5.S		nacc1.L		fam53a.S
alcam.S	ssr2.L	cpne3.L		alcam.S	rps6ka4.L	stx6.S		atp9a		picalm.1.L
msra.2.L	ccnl2.S	cdc34.S		msra.2.L	efcab6	asb7.L		fam98a		magi1.L
ddr2.L	nrbp2.L	sf3b5.S		ddr2.L	kpna2.S	rbmx.S		sin3b.L		cdc6.S
wwc3.L	hspa13.L	stx6.S		wwc3.L	rhbdl3	b4galt3.L		hebp2.S		dapk1.L
Xelaev18023152m	slc22a31.L	asb7.L		Xelaev18023152m	lrrn1.S	spint2.L		mcrip1.S		pag1.S
lrrn3.L	Xelaev18012294m	rbmx.S		lrrn3.L	ssr2.L	rpl37.S		rpn1.S		LOC108709196
mapk8ip1	yeats4.S	b4galt3.L		mapk8ip1	ccnl2.S	cnn1.L		LOC108699095		LOC108719557
kif26a.S	itga6.L	spint2.L		kif26a.S	nrbp2.L	rps3a.L		phf3.L		arhgef11.S
krt2l.L	LOC108701721	rpl37.S		krt2l.L	hspa13.L	rpl17.L		lin9.S		hells.L
hoxa9.L	LOC108701743	cnn1.L		hoxa9.L	slc22a31.L	rps2.L		helz.S		ncoa7.L
dmpk.L	sp7.S	rps3a.L		dmpk.L	Xelaev18012294m	tmem52.L		trpm7.L		tmem57.S
nrdc.L	efs.L	rpl17.L		nrdc.L	yeats4.S	gdf3.S		LOC108705533		zfp36l2.2.L
Xelaev18016371m	LOC108715136	rps2.L		Xelaev18016371m	itga6.L	net1.S		ganab		fam53a.L
hic1.L	hes6.1.S	tmem52.L		hic1.L	LOC108701721	ccnt2.L		fam117b.S		papd5.S
LOC100496837.S	fgfr1.L	gdf3.S		LOC100496837.S	LOC108701743	mplkip		ppp2r5e.L		arhgef12.L
fst.L	etaa1.S	net1.S		fst.L	sp7.S	zfand5.L		foxn2.S		bfar.L
Xelaev18035766m	hes6.1.L	ccnt2.L		Xelaev18035766m	efs.L	rpl17.S		cdan1.L		dand5.S
hesx1.S	mta1.L	mplkip		hesx1.S	LOC108715136	hmgn2.L		gpatch2.L		mos.L
prdm12.L	bcorl1.S	zfand5.L		prdm12.L	hes6.1.S	rpl34.S		herc3.L		slc25a37.L
LOC108717763	ephb3.S	rpl17.S		LOC108717763	fgfr1.L	ckap4.S		iqce.L		tmem170a.S
map1b.S	LOC108700400	hmgn2.L		map1b.S	etaa1.S	kif11.L		adarb1.L		arhgap26.S
chst3.S	ccnb3.L	rpl34.S		chst3.S	hes6.1.L	Xelaev18009838m		rnpepl1.L		chmp1a
otx1.S	Xelaev18005230m	ckap4.S		otx1.S	mta1.L	isg20l2.S		ctdnep1.L		letm2.S
jam3	slc9a3r2.S	kif11.L		jam3	bcorl1.S	rnd1.L		top1.2.S		cited2.L
lmln	LOC108702448	Xelaev18009838m		lmln	ephb3.S	loc733735.L		LOC108719524		ern2.S
gata4.L	chrna2.L	isg20l2.S		gata4.L	LOC108700400	hmgn1.S		usp16.L		cmtm7.S
skida1.L	loc100497729.L	rnd1.L		skida1.L	ccnb3.L	sap30.S		itsn1.L		pik3r2.S
greb1.L	gnai3.S	loc733735.L		greb1.L	Xelaev18005230m	wdr12.L		ccnb2.S		dhx35.S
gpr1.L	farp2.L	hmgn1.S		gpr1.L	slc9a3r2.S	ahnak.L		rps6ka3.L		kank1.L
LOC108714308	guk1.S	sap30.S		LOC108714308	LOC108702448	ap1m2.L		nup133.L		pacs2.L
reps2.S	sec61a1.S	wdr12.L		reps2.S	chrna2.L	LOC108706589		r3hdm1.L		klhdc10.L
barhl2.S	LOC494849	ahnak.L		barhl2.S	loc100497729.L	rbm45.S		sema3a.L		ets1.S
loc100496187.L	dip2a	ap1m2.L		loc100496187.L	gnai3.S	m6pr.L		kcnk5.S		slc30a5.S
vtn.L	fgfr1.S	LOC108706589		vtn.L	farp2.L	rps3a.S		ncbp3		fam46b.S
notch2.S	cfp.L	rbm45.S		notch2.S	guk1.S	rps6.L		map4k4-like.S		fam102b.L
cdh2.L	rbbp8nl.L	m6pr.L		cdh2.L	sec61a1.S	hspa8.S		chaf1a.S		csgalnact1.L
plekhf1.S	ccdc173.L	rps3a.S		plekhf1.S	LOC494849	isg20l2.L		inpp5f.L		tmem131l.L
LOC108716925	chsy1.L	rps6.L		LOC108716925	dip2a	srsf7.S		nde1.S		ets1.L
slc26a4.L	nxpe3l.6.L	hspa8.S		slc26a4.L	fgfr1.S	cdk1.L		ndst1.S		Xelaev18030392m
foxa1.L	elavl3.L	isg20l2.L		foxa1.L	cfp.L	nsep1		tnrc6b.S		ago1.L
lrig1.L	fam212a.S	srsf7.S		lrig1.L	rbbp8nl.L	ptma.L		tuba4.L		rif1.S
xmc.S	arhgef19.L	cdk1.L		xmc.S	ccdc173.L	krt5.7.L		atp13a4.S		patl2.L
plscr3	cfap52.L	nsep1		plscr3	chsy1.L	rps4		yes1.L		dand5.L
pcdh18.L	slc25a29.S	ptma.L		pcdh18.L	nxpe3l.6.L	prpf39		b3gnt2.L		vps13d.L
LOC108715287	lox.S	krt5.7.L		LOC108715287	elavl3.L	luc7l3.S		dpf2.L		aktip.L
col21a1	tmem208.S	rps4		col21a1	fam212a.S	litaf.S		pdia6.L		marchf2
LOC108706759	slc17a9.L	prpf39		LOC108706759	arhgef19.L	loc728026.L		extl3.S		loc100145507.S
megf6.L	utp15.S	luc7l3.S		megf6.L	cfap52.L	psmg1.L		c15orf39.L		asphd2.S
LOC108704058	evpl.L	litaf.S		LOC108704058	slc25a29.S	hmg-17		socs6.L		camsap1.L
epha7.L	elf1.S	loc728026.L		epha7.L	lox.S	rpl7a.S		tmem110.S		prr14l.L
astl2d.3.L	Xelaev18036390m	psmg1.L		astl2d.3.L	tmem208.S	cirbp.S		ccnl1.L		kiaa0922.S
LOC108701458	ube2n.S	hmg-17		LOC108701458	slc17a9.L	cirbp.L		tsc1.L		ralgps1.S
lmo1	hkdc1.L	rpl7a.S		lmo1	utp15.S	khdrbs1.S		lrch3.S		dock9
foxd2.L	prpsap1.S	cirbp.S		foxd2.L	evpl.L	sptan1.L		wasf3.L		tbp.L
LOC108700983	clk2.L	cirbp.L		LOC108700983	elf1.S	znf740.L		tlk1.L		otud4.S
fmnl2-like.S	b4galt3l2.L	khdrbs1.S		fmnl2-like.S	Xelaev18036390m	rpl26.L		znf821.S		foxj1.L
g0s2.L	lzts2.S	sptan1.L		g0s2.L	ube2n.S	wdr83os.L		tspan14.L		foxi2.S
ttn	trpv6.L	znf740.L		ttn	hkdc1.L	rpl7		fdx1l.L
avp.L	zfp36l1.L	rpl26.L		avp.L	prpsap1.S	tubb		kdf1.L
c4orf45.L	egln3.L	wdr83os.L		c4orf45.L	clk2.L	hmgb2.S		cenpi.L
Xelaev18043356m	nckap5l.S	rpl7		Xelaev18043356m	b4galt3l2.L	btg1.L		grip1.S
Xelaev18010194m	znf462.S	tubb		Xelaev18010194m	lzts2.S	LOC100495010.S		ripor1.L
Xelaev18032606m	selk.S	hmgb2.S		Xelaev18032606m	trpv6.L	tm9sf3.S		lemd3.S
mettl24.L	xab2.L	btg1.L		mettl24.L	zfp36l1.L	hspa8.L		LOC108704248
tyr	vangl1.L	LOC100495010.S		tyr	egln3.L	top2b.L		ywhag.L
schip1.S	bpgm.L	tm9sf3.S		schip1.S	nckap5l.S	kif11.S		kdm3b.L
tcim.L	esrp1.L	hspa8.L		tcim.L	znf462.S	hnrnpa1		pawr.L
slamf9	slc35c1.L	top2b.L		slamf9	selk.S	hmgn1.L		tnpo1.S
pitx1.L	c5orf15.S	kif11.S		pitx1.L	xab2.L	tpt1.L		klhl15.L
LOC100494033.L	tprg1l	hnrnpa1		LOC100494033.L	vangl1.L	luc7l2.S		chd8.L
pip5k1b.L	tead4.S	hmgn1.L		pip5k1b.L	bpgm.L	MGC83421		rabgef1.S
tmprss4.L	rybp.L	tpt1.L		tmprss4.L	esrp1.L	myef2.L		wfs1.S
foxq1.S	ubald2-b	luc7l2.S		foxq1.S	slc35c1.L	MGC52578		rimklb-like.S
fkbp9.L	ptger4.S	MGC83421		fkbp9.L	c5orf15.S	tmem127.S		inpp4a.S
Xelaev18011724m	tceb3.L	myef2.L		Xelaev18011724m	tprg1l	slc25a17.L		tle1.L
rnf223.L	tmem238	MGC52578		rnf223.L	tead4.S	sec61b.L		snx27.S
vcan.L	crebzf.S	tmem127.S		vcan.L	rybp.L	LOC108715896		eml4.L
lrfn1.2.S	c14orf79.L	slc25a17.L		lrfn1.2.S	ubald2-b	smim19.L		rptor.L
Xelaev18032557m	leng8.S	sec61b.L		Xelaev18032557m	ptger4.S	hnrnph3.L		uxs1.S
Xelaev18022564m	cnn1.S	LOC108715896		Xelaev18022564m	tceb3.L	leprotl1.L		rbfox2.S
a2ml1.L	cdca5.S	smim19.L		a2ml1.L	tmem238	prpf39.1.S		epas1.L
cdc25b.L	fam195a.L	hnrnph3.L		cdc25b.L	crebzf.S	gtpbp4.L		itpr1.L
LOC108713993	sbspon	leprotl1.L		LOC108713993	c14orf79.L	hmgb3.L		dnmbp.S
shox2	myl6.S	prpf39.1.S		shox2	leng8.S	MGC81028		tbc1d4.L
nog.L	LOC108709581	gtpbp4.L		nog.L	cnn1.S	hnrnpdl.L		ptgfrn.S
LOC108719572	esrp1.S	hmgb3.L		LOC108719572	cdca5.S	mcrs1.S		sept6.S
rnf24.S	znf653.L	MGC81028		rnf24.S	fam195a.L	myef2.S		usp37.L
robo2	b3gnt2.S	hnrnpdl.L		robo2	sbspon	lig3.L		plxna1.S
LOC101731753.L	vhl.S	mcrs1.S		LOC101731753.L	myl6.S	plekhj1.L		socs5.L
xarp-like.S	dsp.L	myef2.S		xarp-like.S	MGC85058	rpl7.L		kdm3a.S
Xelaev18000592m	tuba1cl.2.S	lig3.L		Xelaev18000592m	LOC108709581	plpp2.L		LOC108719552
calb1.L	pdxdc1.L	plekhj1.L		calb1.L	esrp1.S	eif5a.L		ninl.L
fam72a.L	stard10.L	rpl7.L		fam72a.L	znf653.L	anp32c.S		pxn.L
dnah6	rpf1.S	plpp2.L		dnah6	b3gnt2.S	ywhae.L		slc12a6.S
slc38a3	cdca5.L	eif5a.L		slc38a3	vhl.S	esyt2.S		spsb1.S
ptch2.S	elmo1.L	anp32c.S		ptch2.S	dsp.L	eef1a1o.S		qrich1.1.L
vstm2b.S	LOC108702843	ywhae.L		vstm2b.S	tuba1cl.2.S	aurka.L		gpd2.L
trim63.S	upk1b.L	esyt2.S		trim63.S	pdxdc1.L	itm2a.L		mapkapk2.S
mboat2	ythdf2.L	eef1a1o.S		mboat2	stard10.L	brix1.S		MGC84581
capn13.S	slc2a2.L	aurka.L		capn13.S	twsg1.S	arhgap39		daam1.L
hmcn1.L	LOC108713924	itm2a.L		hmcn1.L	rpf1.S	hnrnpa2b1.S		znf516.S
LOC108703371	eif4a1.S	brix1.S		LOC108703371	cdca5.L	slu7.L		iqgap3.L
LOC108700903	arhgef3.1.S	arhgap39		LOC108700903	elmo1.L	arl1.L		zdhhc5.L
loc100494211.L	lrrc1.S	hnrnpa2b1.S		loc100494211.L	LOC108702843	prmt1.S		trak2.L
sidt1.S	tuba4b.S	slu7.L		sidt1.S	upk1b.L	hnrnpab.L		plpp1.L
LOC108696753	muc5b	arl1.L		LOC108696753	ythdf2.L	eif4a1.L		ambra1.S
ror2.L	prc1.L	prmt1.S		ror2.L	slc2a2.L	ywhae.S		fam214a.L
LOC108716776	slc35a2.L	hnrnpab.L		LOC108716776	LOC108713924	smarce1.S		cdc42se2-like.1.S
Xetrov90020413m.S	zc3h15.S	eif4a1.L		Xetrov90020413m.S	eif4a1.S	hdlbp.L		hyls1.S
twist1.S	tm9sf2.L	ywhae.S		twist1.S	arhgef3.1.S	srsf3.S		ppp1r12a.S
LOC108713771	spsb4.L	smarce1.S		LOC108713771	lrrc1.S	cdh1.S		ccnl1
hdac9.S	gmeb1.L	hdlbp.L		hdac9.S	tuba4b.S	hps3.L		msl2.L
jund.S	msi1.L	srsf3.S		jund.S	muc5b	upk1b		c19orf44.L
rasgrp2.L	srp19.S	cdh1.S		rasgrp2.L	prc1.L	upk1b.S		chst12.L
shox	eif4e.L	hps3.L		shox	slc35a2.L			stx2.L
nceh1.L	chmp1b.L	upk1b		nceh1.L	zc3h15.S			atg101.L
prdm15.L	znf750.S	upk1b.S		prdm15.L	tm9sf2.L			sin3a.L
Xelaev18024399m	LOC108698339	cask.L		Xelaev18024399m	spsb4.L			cep164.L
chrd.2.L	utp6.L	mark2.S		chrd.2.L	gmeb1.L			p2rx4.L
lama2	cnot9	shroom4.L		lama2	msi1.L			ext1.S
clca3.L	ccnj.L	snx17		clca3.L	zfp36l1.S			phc3.L
enc1.2.S	elovl7.L	coq10a.L		enc1.2.S	elf1.L			gpr157.L
aff2.S	cltc.L	ecsit.S		aff2.S	srp19.S			tmem255a.S
ednra.L	fsbp-like.L	cysrt1		ednra.L	eif4e.L			gabpb2.S
col13a1.L	nr2f6	golim4.S		col13a1.L	chmp1b.L			slc35e1.L
crp	eef2.1.S	shkbp1.L		crp	znf750.S			fbxo42.S
Xelaev18007821m	hgs.L	pdzd2.S		Xelaev18007821m	LOC108698339			vps54.L
bhlhe22.L	c10orf88.L	flna		bhlhe22.L	utp6.L			rabif.S
upp2.L	chmp4b.S	plekha5		upp2.L	cnot9			wdr59.L
chsy3	bloc1s1.S	MGC115657		chsy3	ccnj.L			zdhhc8.S
mecom.L	ndufv1.L	tor1b.S		mecom.L	elovl7.L			neil3.L
Xelaev18017910m	upk3a.L	ccdc158		Xelaev18017910m	cltc.L			jade3.S
lypd6.L	srsf2.L	zfp36l1.S		lypd6.L	fsbp-like.L			Xelaev18041216m
pcdh11x	LOC108719545	tubg1.S		pcdh11x	ccser2.S			nos1ap
ppl.L	cdc34.L	ralb.L		ppl.L	nr2f6			sytl4.S
artn.S	hmgcr.S	cep120.L		artn.S	eef2.1.S			sh3glb1.S
ndnf.L	upk1a.L	ubtd2.S		ndnf.L	hgs.L			kiaa1671
ptch2.L	scaf1.L	pdcd6.L		ptch2.L	c10orf88.L			keap1.S
ckmt1b.S	ywhaq.S	rhobtb2		ckmt1b.S	chmp4b.S			lin54.S
ralgds.S	rpap3.L	znf234.L		ralgds.S	bloc1s1.S			adam9.S
sgk223.S	prpf39.1.L	znf684.S		sgk223.S	ndufv1.L			dbnl.S
jhy	kansl2.S	zswim1.S		jhy	upk3a.L			idh3a.S
ptchd4	rfng.L	plxnb2.S		ptchd4	srsf2.L			mbp.S
p4htm.L	bmp7.2.L	tcf19.L		p4htm.L	LOC108719545			samd4a.L
phox2b.L	eif3e.L	prss16.L		phox2b.L	cdc34.L			src.L
arl8a.S	rrp12.S	haus3.L		arl8a.S	hmgcr.S			znf646.L
MGC86526.S	rhbdd2.S	lin9.L		MGC86526.S	upk1a.L			ubr2.S
btbd6.L	rps9	abr.S		btbd6.L	scaf1.L			ppfibp2
moxd1.S	apex1.S	slc35c1.S		moxd1.S	ywhaq.S			wdr45.S
notch2.L	arf1.S	cdc20.L		notch2.L	rpap3.L			adpgk.L
emx2.S	ostc.L	dip2b		emx2.S	prpf39.1.L			snx30.L
alpl.L	MGC64308	ubr5.L		alpl.L	kansl2.S			dvl3
Xelaev18020631m	ssr1.S	tpcn1.L		Xelaev18020631m	rfng.L			csnk1e.S
sncg.S	rpl13.S	znf704		sncg.S	bmp7.2.L			dmtf1.L
nrsn1.L	lypla2.S	pard3.L		nrsn1.L	eif3e.L			gapvd1.S
tbx2.S	ppfia1.L	elf1.L		tbx2.S	rrp12.S			map3k4.S
cfh.L	ints12.L	tctn2.L		cfh.L	rhbdd2.S			lonrf2.L
foxd1.S	mfsd5.S	twsg1.S		foxd1.S	rps9			stk24.S
cdx1.L	uap1.S	igf2r.L		cdx1.L	apex1.S			MGC84007
mafa.L	gmnn.S	mef2d.S		mafa.L	arf1.S			znf407.S
Xelaev18008648m	rce1.S	tnrc6b.L		Xelaev18008648m	ostc.L			sys1.S
sema4b.L	znf182	LOC108718446		sema4b.L	MGC64308			lcor.L
LOC108698354	LOC108695585	ubr2.L		LOC108698354	ssr1.S			rlf.L
a2ml1	pcdh1.S	pign.S		a2ml1	rpl13.S			e2f7.L
wfdc8	luzp1.S	LOC108719533		wfdc8	cysrt1			hmgxb4.S
ca7.S	map4k4-like.L	slmap.L		ca7.S	lypla2.S			usp9x.L
Xelaev18029191m	brd8.S	alg12.L		Xelaev18029191m				tmem5.S
foxd3.S	ctdsp1	shf.L		foxd3.S				ckap2.S
slc26a9.L	anapc13.1.L	zfp661		slc26a9.L				ctsd.S
fli1.S	MGC115291	kmt2b		fli1.S				arl15.L
eya1.L	mex3a.L	ptpra.S		eya1.L				ankle2.L
LOC108703373	optn.S	ccdc88a		LOC108703373				siah1.L
olig4.L	gcnt3.S	ccser2.S		olig4.L				impad1.L
limd2.L	gls.L	bdp1.S		limd2.L				pla2g6.L
rbfox3	tmem230.L	zcchc11.S		rbfox3				top1mt-like.L
ca14.L	pid1.L	rassf3.S		ca14.L				larp4.S
pcsk9.L	LOC108695561	dbf4b.L		pcsk9.L				picalm.S
Xelaev18039582m	parpbp.S	rnf130.S		Xelaev18039582m				tom1l2.L
p2ry1.L	tmem39b.L	tmem131.L		p2ry1.L				ranbp2.L
zic5.L	loc100158433.L	gab2.L		zic5.L				mbip.L
sema6a.L	lrp1.L	pcyox1.L		sema6a.L				kif1b.L
slc10a3.S	cry-dash.L	spty2d1.S		slc10a3.S				znf335.S
jakmip2.L	zmynd19.L	gtf2ird1.S		jakmip2.L				kif24.L
LOC108715064	pgm2l1	dcp1a		LOC108715064				haus6.S
LOC108706875	dgkq.L	madd.S		LOC108706875				ncor1.L
arhgef40.S	c2orf49.S	jmjd4.L		arhgef40.S				cttnbp2.L
fgfr2.S	snx7.L	zfyve28-like.1.S		fgfr2.S				galnt2.S
LOC108698306	dgkz	gpkow.L		LOC108698306				rnf115.S
nwd2.S	srgap2.S	smn2.S		nwd2.S				thada
dennd2c.S	rab31.L	asap2.S		dennd2c.S				phka1
metrnl	LOC108695555	sgms1.L		metrnl				LOC108704685
cd163	cntrl.L	lipe.L		cd163				helz.L
lmo3.L	myo10.2.L	siva1.L		lmo3.L				abcd1.L
ror2.S	dcaf10.S	mb21d2.L		ror2.S				dcun1d5.S
pcbp2.S	znf367.S	wwp1.S		pcbp2.S				rbsn.L
nr2f2	nfxl1.L	rfwd2.S		nr2f2				stambp.S
cyp26a1.L	dcp1a.S	fez2.L		cyp26a1.L				hif1an.S
kiaa1217.L	LOC108719517	spice1.L		kiaa1217.L				dnajc14.S
LOC108701786	ttbk2.S	efcab14.L		LOC108701786				cdk8
bcl2l10.L	slc15a4.L	git2.L		bcl2l10.L				adnp.L
vcan	pik3ca.S	arhgap35.L		vcan				traf4.S
rap1gap2.S	mapkapk5.S	agap1.L		rap1gap2.S				sos2.S
rnd3.S	map3k8.L	hells.S		rnd3.S				ipo9.L
aplnr.S	ctif.L	fam20b.S		aplnr.S				rexo1.L
admp.S	bet1.S	usp22 a		admp.S				araf.S
hoxb6.S	ncor2.S	rnf19b.S		hoxb6.S				nufip2.L
fn3k.L	setd4.L	snx13.S		fn3k.L				gcc1.S
LOC108717899	grin2b.S	fam53c.S		LOC108717899				usp38.S
Xelaev18026908m	mis18a.L	ralgapb.L		Xelaev18026908m				pja2.S
akap12.L	LOC108716296	slc9b2.S		akap12.L				ska2.L
rnf125.S	itga5.S	pik3r2.L		rnf125.S				orc1.L
LOC108697537	xrcc2.L	rapgef6.S		LOC108697537				tnpo1.L
LOC108718065	mcf2l	spire2.L		LOC108718065				mia3-like.1.L
chrd.L	rad51d.L	atat1.S		chrd.L				ing3.L
wnt5a.L	MGC115585	prkch.L		wnt5a.L				irf2bpl.L
fndc3b.S	cdadc1.S	tmem51.L		fndc3b.S				chfr.L
akap2.S	sbk1.L	zdhhc7.S		akap2.S				gdf9.L
hmx3.L	cttn.L	pias3.S		hmx3.L				zbtb33.S
tlx3.L	LOC108704260	LOC108706563		tlx3.L				dhx30.S
stard5.S	plpp5.L	rnf217.L		stard5.S				raf1.S
slc44a5.S	madd.L	cog1.S		slc44a5.S				orai2.S
dgka.L	dnajb14.L	fam189a1.S		dgka.L				zbtb47.L
acsf2.S	LOC108696623	ralgapa1.S		acsf2.S				cenpn.L
hao1.L	socs4.L	rassf2.L		hao1.L				stxbp5.L
dixdc1.L	LOC108708488	kdm5c.S		dixdc1.L				foxm1.S
cep63.S	tigd5	mylip.S		cep63.S				strbp.L
LOC108715350	arhgap32.S	heatr5a.L		LOC108715350				arhgef18
slc38a8.L	nxpe3.S	ate1.L		slc38a8.L				grinl1a.L
LOC108698349	tmem110.L	xpo6.L		LOC108698349				arhgap32.L
mgc69520.S	cebpb.S	sec22a.L		mgc69520.S				hmgxb3.L
s1pr1.S	LOC108701404	wdr37.L		s1pr1.S				tada3.S
cdh2.S	fryl.L	borcs6.S		cdh2.S				n6amt1.L
armc4.S	gpr83	slc25a36.S		armc4.S				ippk.L
akap2.L	rnf112.1.S	mtss1.1.S		akap2.L				ube3a.L
enc1.L	mrps11.L	phkg2.L		enc1.L				zfp36l1.S
slc34a2.L	sowahc.L	cebpg.L		slc34a2.L				mpst
adgrb2.L	Xelaev18047576m	tprn		adgrb2.L				racgap1.S
ggt1.L	LOC108714950	stub1.S		ggt1.L				sdr42e1.L
cep63.L	mapkbp1.S	dus4l.L		cep63.L				rab33b.S
meis2.S	meis3.L	slc20a2.L		meis2.S				slc30a4.L
ctsf.L	LOC108719547	pex12.L		ctsf.L				gtpbp2.S
itga2.L	nr1i2.S	picalm.1.S		itga2.L				usp3.L
prom1.L	pcgf2.L	loc733556.L		prom1.L				rab11fip5.L
LOC108720035	fam110c.S	c14orf166.S		LOC108720035				ccdc186
stk40.L	zic1.L	aebp2.S		stk40.L				lmtk2.L
scel.L	LOC108719063	tank.L		scel.L				Xelaev18001896m
cebpa.S	tdgf1.1.L	Xelaev18011044m		cebpa.S				atrn.S
sema6a.S	chst8.L	dgke.S		sema6a.S				trim7.S
phox2b.S	nedd9.S	trpv4.L		phox2b.S				hps4.L
crb2.L	Xelaev18039004m	scap.L		crb2.L				ier5l.L
rasgef1b.L	anapc10.S	arv1.S		rasgef1b.L				syvn1.L
Xelaev18001986m	pdgfrl.2.L	poc5.L		Xelaev18001986m				zbtb33.L
zeb2.L	foxh1.S	loc100493164.L		zeb2.L				nf1.S
tbr1.S	LOC108719562	LOC108708787		tbr1.S				ccnyl1.S
tmem116.S	LOC108704294	bcar3.L		tmem116.S				tbc1d30.S
tmprss9.L	gli1.S	mtmr10.L		tmprss9.L				scyl2.S
prdm1.L	znf33a.L	xpo6.S		prdm1.L				stard7.S
ror1.L	h2afj.S	loc100216027.L		ror1.L				nfkbie.L
Xelaev18012292m	LOC108697345	capn15.L		Xelaev18012292m				gpr137c.S
plcb2.L	lratd1	plxnb2.L		plcb2.L				syne2
dhh.S	fosl1.L	pigc.S		dhh.S				mgat1.L
Xelaev18043812m	foxi2.L	slc25a16.L		Xelaev18043812m				ndst1.L
fgf16.S	socs1.S	mef2d.L		fgf16.S				spty2d1.L
sowahc.S	Xelaev18038459m	slc25a46.L		sowahc.S				fam20b.L
hsf3	socs3.L	cbwd1.1.L		hsf3				rad54l2.L
prtg.S	hes7.1.L	tbc1d9		prtg.S				efna5.S
ly9		usp34.L		ly9				armt1.L
slain2.L		LOC100490741.L		slain2.L				slc30a1.L
LOC108718211		slc15a4.S		LOC108718211				emc8.S
prkx.L		stk35.S		prkx.L				dclre1c.S
micu3.L		cfap97.L		micu3.L				pde6d.L
meis3.S		fastkd1.L		meis3.S				dpp9.L
pkp1.L		klhdc10		pkp1.L				bptf.S
LOC108708347		rapgef1.L		LOC108708347				sorl1.L
irx1.S		bptf.L		irx1.S				ubr3.L
dcbld1.S		MGC85180		dcbld1.S				orai2.L
saxo1		herc1.L		saxo1				ctif.S
enpp2.L		LOC108714033		enpp2.L				spag9
kit.S		prrg1.L		kit.S				ppp3r1.L
bhlhe40.L		styk1.S		bhlhe40.L				tmtc3.L
Xelaev18012280m		asphd2.L		Xelaev18012280m				nemp1.L
sall3.S		arhgap11a.2.S		sall3.S				mpp5.L
LOC108704158		MGC85058		LOC108704158				scarb1.L
cebpd.S		pid1.S		cebpd.S				LOC108704268
LOC108696302		nlk.L		LOC108696302				csrnp1.L
reln.L		tgds.S		reln.L				plpp6.L
mpzl2.L		lmo4.2.S		mpzl2.L				mis18bp1a
cnksr1.S		rnf8.L		cnksr1.S				armc1.L
LOC108706398		znf577.S		LOC108706398				ube2j2.S
LOC100498184.L		crtc3.S		LOC100498184.L				mier2.S
col5a1.L		gata2.L		col5a1.L				plekhm1.S
kdr.L		taf4b.S		kdr.L				mios.L
cd5l		capn15.S		cd5l				tmbim1.L
Xelaev18023478m		sbf2.L		Xelaev18023478m				taok3.L
mospd1.L		spopl.S		mospd1.L				mkln1.S
pkdcc.1.S		arhgap21.L		pkdcc.1.S				pigb.S
enc1.S		Xelaev18024710m		enc1.S				rhbdf2.L
LOC108716739		gatsl3.L		LOC108716739				klhl21.L
sema4a.S		usp34.S		sema4a.S				dapl1.S
slfn13.L		rnf19b.L		slfn13.L				trim25
zic5.S		rad51c.L		zic5.S				brox.S
flt1.S		dnajc13.L		flt1.S				dag1.S
aldh1a2.S		ankrd52.S		aldh1a2.S				atp8b4.S
tril.L		lhfpl2.S		tril.L				pard6b.S
c8g.S		rilp.S		c8g.S				mum1.L
fut3.L		aak1.S		fut3.L				man2a2.L
mmp14.L		kiaa0586.L		mmp14.L				tmed9.L
isl1.L		etv6.S		isl1.L				klhl32.L
foxa2.L		kazn.L		foxa2.L				ubr5.S
foxd3.L		polg.L		foxd3.L				ptpn4.L
sox11.L		dcaf12.L		sox11.L				nelfa.L
fli1.L		tmcc2.S		fli1.L				elavl2.S
Xelaev18002117m		mid1.S		Xelaev18002117m				kiaa0196.S
kl.S		mgll.L		kl.S				kctd6.L
dmrt2.L		fryl.S		dmrt2.L				adarb1.S
clcn5.L		fry.L		clcn5.L				osbpl8.S
rab15.L		fam53a.S		rab15.L				xpo5.S
retn.2.L		picalm.1.L		retn.2.L				jak2.L
Xelaev18022404m		magi1.L		Xelaev18022404m				ubl7.L
stx3.L		kctd15.L		stx3.L				slc25a44.S
gpr4		cdc6.S		gpr4				cct6a.L
mmp1.S		dapk1.L		mmp1.S				tfdp2.L
crx.S		pag1.S		crx.S				senp7.L
spsb4.S		LOC108709196		spsb4.S				brox.L
nuak1.L		LOC108719557		nuak1.L				gab2.S
sox11.S		arhgef11.S		sox11.S				smad2.L
LOC108708225		hells.L		LOC108708225				twsg1.L
col9a2.L		ncoa7.L		col9a2.L				dennd4b.L
st3gal1.L		tmem57.S		st3gal1.L				Xelaev18046477m
carmil3		zfp36l2.2.L		carmil3				otud3.L
gramd1a.L		fam53a.L		gramd1a.L				taf5l.S
mn1.S		papd5.S		mn1.S				wnk1.L
arrdc2.S		arhgef12.L		arrdc2.S				mtmr4.L
fth1.L		bfar.L		fth1.L				kidins220.L
slc30a8.L		dand5.S		slc30a8.L				ppp1r9a.S
LOC108705469		mos.L		LOC108705469				smad4.2.L
gatm.S		slc25a37.L		gatm.S				yae1d1.L
emx2.L		tmem170a.S		emx2.L				shf.S
hsh2d		arhgap26.S		hsh2d				znf423.L
slc4a4.S		chmp1a		slc4a4.S				tjap1.S
metrnl.L		letm2.S		metrnl.L				ung.L
cdc25b.S		cited2.L		cdc25b.S				lpgat1.L
slc25a24.L		ern2.S		slc25a24.L				nus1.L
fhl3.S		cmtm7.S		fhl3.S				hipk3.S
fam3a.S		pik3r2.S		fam3a.S				lrrc58.S
ugp2.S		dhx35.S		ugp2.S				tmem115.L
nkd1.L		kank1.L		nkd1.L				slc39a10
fzd10.L		pacs2.L		fzd10.L				fam189a2.L
LOC108712518		klhdc10.L		LOC108712518				csrnp2.S
fam57a.L		ets1.S		fam57a.L				tcirg1.L
nxpe2p1		slc30a5.S		nxpe2p1				gpr155.S
fam13b.L		fam46b.S		fam13b.L				n4bp1.L
acer1.L		fam102b.L		acer1.L				fam46c.S
flrt2.L		csgalnact1.L		flrt2.L				hnrnpll.S
ptprr.L		tmem131l.L		ptprr.L				dqx1.L
bcor		ets1.L		bcor				larp4.L
gatd3b		Xelaev18030392m		gatd3b				mrpl1.L
tbx6		ago1.L		tbx6				baiap2l1.S
maob.L		rif1.S		maob.L				bnip2.S
rsph1.L		patl2.L		rsph1.L				fermt2.S
stk40.S		dand5.L		stk40.S				cass4.L
mttp		vps13d.L		mttp				slain2.S
rapgef5.L		aktip.L		rapgef5.L				ryk.S
tbx2.L		marchf2		itgb8.L				tab3.S
chga.S		loc100145507.S		tbx2.L				esco1.L
LOC108715348		asphd2.S		chga.S				ccdc149.S
palm.S		camsap1.L		LOC108715348				letmd1.L
birc2.S		prr14l.L		palm.S				stambp.L
LOC100487499.S		kiaa0922.S		birc2.S				foxo3.S
dact1.S		ralgps1.S		LOC100487499.S				hspbap1.L
LOC108718667		dock9		dact1.S				atrn.L
sox4.S		tbp.L		LOC108718667				rab8b.L
smc2.S		otud4.S		sox4.S				arid4b.L
noxo1.1.L		foxj1.L		smc2.S				atp10d.L
sox10.L		foxi2.S		noxo1.1.L				ppp1r12a.L
tes.S				sox10.L				kpna3.L
znf608				tes.S				ube3c.S
hes1.L				znf608				tbc1d14
znf608.S				hes1.L				gpsm2.S
ampd3.S				znf608.S				ptp4a3.S
slc6a14.2.L				ampd3.S				chd8.S
znf503				slc6a14.2.L				hes7.2.L
LOC108700879				znf503				Xelaev18045296m
vstm2b.L				LOC108700879				gnpat.S
mmd.L				vstm2b.L				txn2.S
MGC81337				mmd.L				etaa1.L
wfdc1.L				MGC81337				klhl18.S
Xelaev18005924m				wfdc1.L				cdt1.L
gjb2.S				Xelaev18005924m				gpsm2.L
arhgef26.S				gjb2.S				sap130.L
atp1a1.S				arhgef26.S				tbc1d10a.L
arhgef38.L				atp1a1.S				birc6.L
tnfrsf19.L				arhgef38.L				slc9a7.S
lrp10.L				tnfrsf19.L				cic.L
Xelaev18036963m				lrp10.L				exoc2.L
Xelaev18027048m				Xelaev18036963m				abhd11.L
cyp27c1.S				Xelaev18027048m				kdm3a.L
maats1				cyp27c1.S				znf782.S
cemip2				maats1				rfx7.L
pycard.L				cemip2				hspa5.S
Xelaev18009472m				pycard.L				jmjd6.L
tmprss9.S				Xelaev18009472m				men1.L
LOC108708252				tmprss9.S				senp1.L
fkbp10.S				LOC108708252				ano1.L
gata3.S				fkbp10.S				cln6.L
slc26a5.L				gata3.S				btbd3.S
zhx1.S				slc26a5.L				pnrc2.S
skor1.S				zhx1.S				ccdc149.L
hs6st1.S				skor1.S				MGC81661
lpin1.S				hs6st1.S				traf7.L
alcam.L				lpin1.S				mau2.L
pced1a.S				alcam.L				vps53.S
dysf-like.L				pced1a.S				smad1.L
Xelaev18012293m				dysf-like.L				tmem63a.S
ccne2.L				Xelaev18012293m				recql5.L
hprt1				ccne2.L				elmod3.S
MGC82544				hprt1				snap47.L
fbp1.L				MGC82544				negr1.L
sema5b				fbp1.L				tube1.L
sp8.S				sema5b				b3gnt4.L
MGC81482				sp8.S				ttpal.S
schip1.L				MGC81482				tbc1d23.L
lfng.L				schip1.L				gbf1.L
trim36.S				lfng.L				tmem189.L
loc100494211.S				trim36.S				dnajc16.S
LOC108698800				loc100494211.S				adcy7.L
foxb1.S				LOC108698800				rnf5.S
fzd2.S				foxb1.S				apc.L
ccnd1.S				fzd2.S				sipa1l1.L
draxin				ccnd1.S				akt1.S
rdh10.L				draxin				trmt6.S
armc1				rdh10.L				akap9.S
loxl1.L				armc1				smarca5.S
krt18.S				loxl1.L				slc44a4.L
esr-5.L				krt18.S				rpgr.S
hes3.1.S				esr-5.L				cbx2.L
btg2.S				hes3.1.S				cep170b.L
rasa3.L				btg2.S				smarcad1.S
tfap2b.S				rasa3.L				paqr3.L
LOC100495222.1.L				tfap2b.S				chic2
gadd45g.S				LOC100495222.1.L				adam10
arl6ip1.L				gadd45g.S				sirt6.S
slc8a1				arl6ip1.L				rfx7
lama3.L				slc8a1				kiaa0513.S
zic3.L				lama3.L				atp8a1.L
rhpn2.L				zic3.L				rapgef1.S
loc108718659.S				rhpn2.L				ddb2.L
il11ra.L				loc108718659.S				mast3
cdk15.L				il11ra.L				pde7a.S
pcdh10.S				cdk15.L				tbc1d12.S
mig30.L				pcdh10.S				derl2l.L
calb2.S				mig30.L				med4.S
phlda1.S				calb2.S				clk2.S
rps21.L				phlda1.S				thap1
slc2a13.S				rps21.L				clec16a.L
chrd				slc2a13.S				fbxo45.S
fndc3a.L				chrd				cep76.L
prr5l.L				fndc3a.L				aff1.L
LOC108713032				prr5l.L				cep55-like.L
arrdc2.L				LOC108713032				sdc3
loc108648340.L				arrdc2.L				sema3a.S
spata13.L				loc108648340.L				fbxl19.L
LOC108699553				spata13.L				MGC83673
LOC108717369				LOC108699553				lrrc28.L
fzd2				LOC108717369				rfc1.L
LOC108713701				fzd2				akap17a.L
LOC108707159				LOC108713701				tmem87b.L
sdc4.L				LOC108707159				dcaf1.L
dnajc6.L				sdc4.L				snx33.S
apeh.L				dnajc6.L				arhgap21.S
fank1.L				apeh.L				arhgef11.L
zfhx3.L				fank1.L				daam1.S
id3.L				zfhx3.L				magi1.S
kcna3.L				id3.L				pag1.L
klf10.L				kcna3.L				zfp36l2.S
LOC100489554.L				klf10.L				gpi.L
hlx				LOC100489554.L				med18.S
hs6st1.L				hlx				rab5d.S
vit.L				hs6st1.L				LOC108712660
anxa6.L				vit.L				cog3.S
crebl2.L				anxa6.L				tpcn2
dlx5.L				crebl2.L				klhl22.L
sdhaf2.S				dlx5.L				uba3.S
LOC108696274				sdhaf2.S				elf1.L
clcn2.L				LOC108696274				mfsd14b
loc733726.L				clcn2.L				rabgef1.L
LOC108720014				loc733726.L				dlg1
anxa2.S				LOC108720014				znf577.L
mob2.2.L				anxa2.S				rock1.L
plxna2.S				mob2.2.L				tbc1d25.S
nkain1.L				plxna2.S				creld1.L
ccdc63.S				nkain1.L				acsl4.S
sall1.L				ccdc63.S				ganab.L
tmem52.S				sall1.L				ppara.S
LOC108719253				tmem52.S				ptpn12.S
klrc4-klrk1				LOC108719253				mtfr1l.L
tpr				klrc4-klrk1				phlpp1.S
sh3rf2.S				tpr				rcbtb1.S
wdr83os.S				sh3rf2.S				ranbp3.S
dedd2.S				wdr83os.S				oxsm.S
LOC100490918.L				dedd2.S				tmem169.L
afap1.S				LOC100490918.L				sh2b1.S
sox17a.S				afap1.S				mphosph6.L
fam102a.L				sox17a.S				dlg5.L
nuak1.S				fam102a.L				ap5b1.L
Xelaev18024458m				nuak1.S				mid1.L
bpi				Xelaev18024458m				brat1.L
gpr143.L				bpi				LOC108707237
cacnb4.S				gpr143.L				LOC108712538
hao2.L				cacnb4.S				fam126b
ndufa8.S				hao2.L				h1foo.L
cfb.L				ndufa8.S				eea1.L
LOC108708517				cfb.L				kif1b.S
Xelaev18038622m				LOC108708517				slc39a10.L
nek6.S				Xelaev18038622m				arhgap35.S
aldh1a2.L				nek6.S				phlpp1.L
LOC108710017				aldh1a2.L				rgs3.S
camk1g				LOC108710017				fbxl4.S
dact1.L				camk1g				c1galt1c1.S
LOC100497556.L				dact1.L				p2ry2.L
tiprl.L				LOC100497556.L				plin3.S
cd99l2.S				tiprl.L				grk6.S
adamts1.L				cd99l2.S				foxn2.L
tmem238.S				adamts1.L				ado.L
pcdh7.L				tmem238.S				gs17.S
wwc1.L				pcdh7.L				leprotl1.S
fgfrl1.L				wwc1.L				wdfy3
guca1a.S				fgfrl1.L				rpa2.L
abca8.L				guca1a.S				dcaf5.S
gsto1.S				abca8.L				xl64phr
piezo2				gsto1.S				daglb.L
dfna5.L				piezo2				has2.L
cdc42bpa.S				dfna5.L				emsy.S
chrm4.L				cdc42bpa.S				mex3d.S
irx2.S				chrm4.L				twsg1.S
zswim6.S				irx2.S				ythdf3.S
Xelaev18035319m				zswim6.S				sos2.L
nxpe3				Xelaev18035319m				znf395.L
ifltd1.S				nxpe3				zar1l.L
lgr5.S				ifltd1.S				hgsnat.L
tbx1.S				lgr5.S				nfat5.L
LOC108705424				tbx1.S				rhog-like.1.S
plekhn1.L				LOC108705424				zranb1.S
Xelaev18047094m				plekhn1.L				aes.L
LOC108710853				Xelaev18047094m				gm29884
bcor.S				LOC108710853				aspm
ralgds.L				bcor.S				afg3l2
Xelaev18037856m				ralgds.L				chd6.S
LOC108701162				Xelaev18037856m				csk.S
fmc1.L				LOC108701162				spdl1.L
Xelaev18000483m				fmc1.L				habp4.S
pkdcc.1.L				zic2.S				rcor2.L
wwtr1.S				Xelaev18000483m				stt3b.S
ahnak.S				pkdcc.1.L				rpa1.L
azin2.S				wwtr1.S				abhd17a.L
suox.S				ahnak.S				endod1.L
klf6.S				azin2.S				stk11.L
unkl.S				suox.S				fam46c.L
Xelaev18044534m				klf6.S				plxna3.L
popdc2.L				unkl.S				setbp1.S
foxa1.S				Xelaev18044534m				fbxl19.S
cml				popdc2.L				stox2
rai14.L				foxa1.S				tgs1.L
Xetrov90026452m.S				cml				atxn1l.S
cdc42se2-like.1.L				rai14.L				tango6
wsb1.L				Xetrov90026452m.S				chpf.S
fzd8.L				cdc42se2-like.1.L				rfwd2.L
rgs16.S				wsb1.L				pdzd8.S
atp1a1.L				fzd8.L				ncoa4.L
hmgcl.S				rgs16.S				arid4b.S
celsr1				atp1a1.L				fam110c.L
rps21				hmgcl.S				ankrd40.S
fbxo32				celsr1				lin28b.S
fbn3.L				rps21				secisbp2l.L
nr1i2.L				fbxo32				lrif1
creb1.L				fbn3.L				usp46.S
LOC108701311				nr1i2.L				cc2d1b.S
krasl.S				creb1.L				rdh9.L
dhx32.L				LOC108701311				ttc37.L
slc22a23.L				krasl.S				cers5.L
gata6.S				dhx32.L				zbtb5.S
MGC53707				slc22a23.L				dnajc14.L
tub.L				gata6.S				tsc22d1
adap2.L				MGC53707				homez.L
slc7a3.L				tub.L				mapkapk2.L
ilk.S				adap2.L				Xelaev18030718m
mn1.L				slc7a3.L				serinc2.L
bmpr1b.L				ilk.S				snai1.S
LOC108700186				mn1.L				atp10a
tubb2b.L				bmpr1b.L				smad7.S
lgals3.S				LOC108700186				poldip2.S
cmtm8.L				tubb2b.L				uck2
Xelaev18042341m				lgals3.S				efhd1.L
Xelaev18018260m				cmtm8.L				Xelaev18003062m
phldb1.S				Xelaev18042341m				clec16a.S
hal.1.L				Xelaev18018260m				zranb1.L
LOC108719633				phldb1.S				kiaa0226l.S
znrd1.L				hal.1.L				fam134c.L
ccng1.L				LOC108719633				kat2b
LOC108713946				znrd1.L				pcsk7.S
ras-dva1.L				ccng1.L				usp32.S
ubxn11.S				LOC108713946				fam49a.S
lmo4.1.S				ras-dva1.L				smc5.S
spsb3				ubxn11.S				wdr82.S
actb.L				lmo4.1.S				zhx3.S
plekhg5.S				spsb3				aim1.L
plscr3.L				actb.L				b4galt2.L
skor1.L				plekhg5.S				ptdss1
Xetrov90029963m.L				plscr3.L				dennd5b.L
LOC108718070				skor1.L				oat.1.L
mst1.L				Xetrov90029963m.L				stx19.L
zswim5				LOC108718070				rhob.L
cmklr1				mst1.L				smad6.S
six4.S				zswim5				slc25a19.L
LOC108698123				cmklr1				dsc3.S
prss27				six4.S				ccny.L
hexim1.L				LOC108698123				plekhm1.L
atp1b3.S				prss27				rab11fip1.S
wnk2				hexim1.L				birc6.S
slc9a3.L				atp1b3.S				xpo4.L
map3k14.S				wnk2				zbtb8b.L
usp43				slc9a3.L				akap13.S
lsm4.L				map3k14.S				gtpbp1.S
fblim1.L				usp43				hectd4.L
LOC100489887.L				lsm4.L				impad1.S
gprc5cl1.L				fblim1.L				borcs5.L
angpt4.S				LOC100489887.L				ccdc126.S
Xelaev18027991m				gprc5cl1.L				dcun1d3.S
pou5f3.1.S				angpt4.S				slc30a6.S
map1lc3b.L				Xelaev18027991m				spryd3.L
cfap100.L				pou5f3.1.S				eif4enif1.S
wdr12.S				map1lc3b.L				smarca5
LOC108698884				cfap100.L				espl1.L
LOC100036994				wdr12.S				fam83g.L
LOC108709398				LOC108698884				cep192.L
ahcyl2.S				LOC100036994				nkd1.S
nr2f6.L				LOC108709398				smg7.L
LOC108707322				ahcyl2.S				ankrd28
LOC108709568				nr2f6.L				ikbkg.L
st3gal5.S				LOC108707322				ppp1r9a.L
fxyd3				LOC108709568				dctn4.L
emg1.L				st3gal5.S				rnf139.S
atp1b3.L				fxyd3				hs2st1.S
LOC108697654				emg1.L				nckipsd.S
rbl1.L				atp1b3.L				wdr47.S
mig30.S				LOC108697654				ccser2.S
Xelaev18003895m				rbl1.L				araf.L
fzd8.S				mig30.S				cep170.S
pou5f3.1.L				Xelaev18003895m				ism1.L
scaf4.L				fzd8.S				pik3c2a.S
tcf7l1.L				zic2.L				nedd4l.S
znf451				pou5f3.1.L				fcho1.S
svip.S				scaf4.L				dvl3.L
camta1				tcf7l1.L				fam210a.S
col9a3.L				znf451				sgpp2.L
golm1.S				svip.S				tasp1.S
crx.L				camta1				ell.S
Xelaev18002446m				col9a3.L				pcdha13.L
ras-dva1.S				golm1.S				trim33.S
ovol2				crx.L				golga3.S
pabpc4.L				Xelaev18002446m				znf526.L
LOC108708446				ras-dva1.S				bmp7.2.S
LOC108706721				ovol2				grm8.L
actb.S				pabpc4.L				nckipsd.L
nfil3				LOC108708446				suco.L
ednra.S				LOC108706721				fbxl15.L
marcksl1.L				actb.S				ppip5k2.L
LOC108715723				nfil3				trappc8.L
apoc1-like.L				ednra.S				znf618.S
cyp27a1				marcksl1.L				kbtbd3.S
mdga1.S				LOC108715723				grb10.S
MGC52759				apoc1-like.L				oat.1.S
LOC108717895				cyp27a1				amfr.S
tprkb.S				mdga1.S				tmem51.S
LOC108709763				MGC52759				sesn2.S
rin2.L				LOC108717895				hdac4.L
acvr1.L				tprkb.S				rab8b.S
otx1.L				LOC108709763				per3.S
mrps10.L				rin2.L				slc33a1.L
gm20188				acvr1.L				taok3.S
tomm7.L				otx1.L				dip2c
cdk2ap2				mrps10.L				pank1.S
asic1				gm20188				slc9a7
sulf1.L				tomm7.L				pigu
znf180.S				cdk2ap2				ints14.S
LOC100127323				asic1				pqlc1.1.S
tiprl.S				sulf1.L				hlcs.L
Xelaev18017186m				znf180.S				ankib1.L
rbm5.L				LOC100127323				vldlr.S
acvr1.S				tiprl.S				dclre1b.L
nxpe4				Xelaev18017186m				slc30a7.L
tacc3.L				rbm5.L				tbc1d12.L
znf800.L				acvr1.S				mdh2.L
MGC84194				nxpe4				ammecr1l.S
LOC108710532				tacc3.L				slc9a6.L
tgif1.S				znf800.L				lats1.S
pcdh8l.S				MGC84194				rapgef2.S
pitpnc1l.L				LOC108710532				spryd3.S
sesn1.S				tgif1.S				arhgef7.S
rasd1.S				pcdh8l.S				sash1.S
spns2.L				pitpnc1l.L				camsap3.L
lpin1.L				sesn1.S				LOC108705257
spns2.S				rasd1.S				ptcd2.L
grasp.S				spns2.L				dpy19l4.S
LOC108697415				lpin1.L				cenpn.S
cldn23				spns2.S				adnp2.L
e2f8.L				grasp.S				rassf3.L
rpl26.S				LOC108697415				syne2.2.S
gata4.S				cldn23				thap7.S
gen1				e2f8.L				itpkc.L
mcm6.2.L				rpl26.S				atg4a.L
lrig3.L				gata4.S				ptpn21.L
fn1.S				gen1				znf845
ccdc71.S				mcm6.2.L				znf347.S
krt8.S				lrig3.L				tbc1d1.S
c17orf58.L				fn1.S				nsmaf.L
plekhn1.S				ccdc71.S				spsb3.L
sppl3.L				krt8.S				atg14.L
ag1.L				c17orf58.L				arrdc1.S
cinp.S				plekhn1.S				LOC108709286
kirrel2.S				sppl3.L				golga2
prnp				ag1.L				snx9.S
rpl29.L				cinp.S				Xelaev18017221m
otx2.S				kirrel2.S				LOC108714398
Xelaev18017103m				prnp				bach2.S
rtkn.S				rpl29.L				gemin2.S
irf2bp2.S				otx2.S				rab11fip2.S
hsd17b6				Xelaev18017103m				znf26
loc108715171.S				rtkn.S				pomgnt2.L
lamtor3.L				irf2bp2.S				itsn2
c1orf198				hsd17b6				furin.L
tcf7l1.S				loc108715171.S				sap30.L
slc2a1.L				lamtor3.L				cpeb3.L
gnai2				c1orf198				fignl1.L
LOC108706094				tcf7l1.S				ccdc66
shfm1.S				slc2a1.L				dapl1.L
cyp27a1.L				gnai2				ube2j2.L
fdft1.S				LOC108706094				fkbp6.L
cyp26a1.S				shfm1.S				uhrf1bp1l.L
emp2.S				cyp27a1.L				wdr81.L
stc1.L				fdft1.S				pigv.S
ank3				cyp26a1.S				igsf9.S
ppp1r14a.L				emp2.S				zbtb41.L
LOC108718018				stc1.L				arf6.S
ppp1r8.L				ank3				pbx3.S
greb1l				ppp1r14a.L				LOC100489074.L
Xelaev18006002m				LOC108718018				bcl9l.S
Xelaev18011097m				ppp1r8.L				cgnl1.L
MGC82989				greb1l				ctdspl.L
rbms2.L				Xelaev18006002m				Xelaev18013924m
adamts1.S				Xelaev18011097m				oxct1.L
prelid1.S				MGC82989				ccdc28a.S
LOC108704271				rbms2.L				pcmtd2.L
hunk.L				adamts1.S				ube3c.L
tmsb4x.L				prelid1.S				ppp1r37.L
plcl2				LOC108704271				cry2.S
kmt2e.L				hunk.L				btbd2.S
rbm12b.L				tmsb4x.L				pard6g.S
loc100494818.S				plcl2				def8.S
smad4.1.L				kmt2e.L				b4galt5
lrp10.S				rbm12b.L				trmt13.L
cyb561.L				loc100494818.S				akap10
rps12.L				smad4.1.L				appl2.L
rpl17-c18orf32				lrp10.S				rab21.L
cotl1.S				cyb561.L				brf2.L
slc2a1.S				rps12.L				tanc2.L
map1lc3b.S				rpl17-c18orf32				dtna.L
sacs				cotl1.S				r3hdm4.S
aplp2.L				slc2a1.S				atp8b4.L
armc7.L				map1lc3b.S				tjp3.S
cox17.L				sacs				fgd4.S
kiaa0247				aplp2.L				apitd1.L
prdx5.L				armc7.L				ern2.L
LOC108704252				cox17.L				ankib1.S
tiparp.L				kiaa0247				mief1.L
march7.S				prdx5.L				vsig10.L
phf1.S				LOC108704252				fitm2.L
msto1.L				tiparp.L				znf521
pgbd4				march7.S				plekhf2.L
cdon.L				phf1.S				tmem178b
Xelaev18032193m				msto1.L				filip1.S
actn1.L				pgbd4				zhx2
LOC108718254				cdon.L				kiaa2026.S
LOC108708226				Xelaev18032193m				chd6.L
ptma.S				actn1.L				ubap1.L
rpl35a.L				LOC108718254				slc39a9.L
rpl37.L				LOC108708226				usp6nl.L
dennd2c.L				ptma.S				mfsd6l.S
mis12.L				rpl35a.L				arhgef15.L
ankrd65.L				rpl37.L				arl5c.L
nudt22.L				dennd2c.L				cnp.L
mypop.S				mis12.L				LOC108705473
tmpo				ankrd65.L				asxl3.S
LOC108709261				nudt22.L				ppp4r1l.S
march6.L				mypop.S				tanc2
ints6l				tmpo				dctpp1.L
irs4.L				LOC108709261				ubl3.S
uqcrq.S				march6.L				rgma.S
cdc42ep2				ints6l				rin3.S
ankrd50.S				irs4.L				prickle4.S
spcs1				uqcrq.S				eif4enif1.L
znf208				cdc42ep2				zar2.L
hist2h2ab.S				ankrd50.S				afap1.L
timm17a.S				spcs1				nploc4.S
rps7				znf208				pdk4.S
rpl32				hist2h2ab.S				fbxo42.L
LOC108708564				timm17a.S				dolpp1.L
dnah5				rps7				rab27b.L
slc27a3.L				rpl32				ccdc9.L
gpc4.S				LOC108708564				sec24b.L
khdc4				dnah5				kiaa1191.L
spred2.L				slc27a3.L				itpkc.S
c6orf62.S				gpc4.S				shroom2
vmp1.L				khdc4				MGC83705
sh3d19.L				spred2.L				smtnl2.S
MGC80567				c6orf62.S				ncan
hunk.S				vmp1.L				tgfbrap1.L
dyrk2				sh3d19.L				kiaa2026.L
atf7ip2				MGC80567				pacs1.L
rfwd3.L				hunk.S				borcs7.S
traf3ip1.L				dyrk2				atf5.2.S
slc25a29.L				atf7ip2				ipmk.L
pkn1.L				rfwd3.L				apcdd1.L
vamp8.S				traf3ip1.L				mcl1.S
stox2.L				slc25a29.L				pdik1l.L
six4.L				pkn1.L				LOC108707139
psd3				vamp8.S				slc25a38
rbm12.L				stox2.L				zbtb47.S
grasp.L				six4.L				styx.S
eef1b2				psd3				tpst2.S
knl1				rbm12.L				tdh.S
pbx2.S				grasp.L				tmem8a.L
prpf8				eef1b2				plk3.L
plgrkt.L				knl1				cux1.S
anln.L				pbx2.S				cnksr2.L
mcoln1.L				prpf8				cep85l
zmcm3.L				plgrkt.L				shroom2.L
cidea.L				anln.L				kif13a
ralb				mcoln1.L				cnksr1.L
epha4.L				zmcm3.L				nfatc3.S
fgd1.S				cidea.L				zdhhc12.L
rpl23.S				ralb				fam107b.S
rps23.L				epha4.L				sh3rf1.S
susd6.L				fgd1.S				nfkbil1.L
Xelaev18022009m				rpl23.S				bcdin3d.L
tgif2.L				rps23.L				spin1.L
rpl31.L				susd6.L				cry1.L
cfap57.L				Xelaev18022009m				Xelaev18031388m
LOC108711622				tgif2.L				cbx2.S
enoph1.S				rpl31.L				zfhx4.L
gtf2ird2				cfap57.L				dock9.L
gosr2.L				LOC108711622				snx18.S
zmym1l.S				enoph1.S				etv6.L
rrp8.S				gtf2ird2				atp2c1
tmem45a.L				gosr2.L				ralgps2.L
slx4.L				zmym1l.S				lrch1.S
cpt1a.L				rrp8.S				c12orf66.L
lsm4.S				tmem45a.L				cbfa2t2.L
noc4l.S				slx4.L				adnp.S
cox7c.S				cpt1a.L				tnfaip1.L
cbx5.L				lsm4.S				nfe2l3.S
utp15.L				noc4l.S				usp9x.S
mgc75753.L				cox7c.S				LOC108714146
zbtb21.L				cbx5.L				mycl.L
itgb1.S				utp15.L				agap1
ccng2.S				mgc75753.L				srebf2.L
LOC108704245				zbtb21.L				fnip1.L
ephb4.L				itgb1.S				epb41l4b.S
rpl30.L				ccng2.S				kiaa0825.L
zbtb39.L				LOC108704245				slc35a5.L
larp6.S				ephb4.L				naa15.S
melk.L				rpl30.L				abhd13.L
ckap5.L				zbtb39.L				lrp8.S
cables2.L				larp6.S				bix1.3.S
cdc42ep2.L				melk.L				evi5.S
pcdh19				ckap5.L				fmn2.L
LOC108709832				cables2.L				tollip.S
Xelaev18038498m				cdc42ep2.L				lefty.L
anln-like.1.L				pcdh19				dop1a
lrp5.L				LOC108709832				ccdc88a.S
kiaa0232.L				Xelaev18038498m				ccdc64.L
utp18.L				anln-like.1.L				rb1cc1.S
LOC108702825				lrp5.L				pikfyve.L
zdhhc21.S				kiaa0232.L				acox2.L
mixer.S				utp18.L				fem1b.L
mixer.L				LOC108702825				ncoa6.S
litaf.L				zdhhc21.S				stard13.S
LOC108695521				mixer.S				enpp4.L
f3.L				mixer.L				exd1.L
rapgef2.L				litaf.L				LOC108700013
LOC108719535				LOC108695521				tbccd1.L
LOC108705994				f3.L				cox5b.2.L
znrf3.S				rapgef2.L				scyl2.L
rps7.S				LOC108719535				ncoa3.S
cdca4.S				LOC108705994				gatad2b
sdc4.S				znrf3.S				tmem131.S
xenf				rps7.S				cgn.S
rbm14.L				cdca4.S				klhl20.S
col4a5.S				sdc4.S				ankrd13c.L
lpcat1.S				xenf				mfsd11.S
irs1.S				rbm14.L				hps6.L
endou.S				col4a5.S				sema4g.L
LOC108717924				lpcat1.S				cep170b.S
foxn3.L				irs1.S				palb2.L
ubap2.L				endou.S				skil.L
ssfa2.L				LOC108717924				znf143.L
LOC108704423				foxn3.L				erf.L
ephb3.L				ubap2.L				fbxo10.L
marcksl1.S				ssfa2.L				bcl2l12.L
sfpq.L				LOC108704423				dab2ip
hdgf.L				ephb3.L				ddx1.L
hexim1.S				marcksl1.S				lats2.S
pfas				sfpq.L				pacsin3.L
fam179b.L				hdgf.L				tsen34.L
1600014c10rik				hexim1.S				c11orf95.L
ctps1.L				pfas				hpcal1.L
gng7.L				fam179b.L				socs6.S
rps16.S				1600014c10rik				rps6ka6
dpm2.L				ctps1.L				suox.L
gsk3a.S				gng7.L				src.S
mgc145260.L				rps16.S				rag2.S
smg1.L				dpm2.L				cdk5r2.L
sesn2.L				gsk3a.S				phlpp2.L
git1.L				mgc145260.L				tex2.2.S
efnb2.L				smg1.L				rbm38.L
LOC108711813				sesn2.L				pigv-like.L
phc1.S				git1.L				mark4.L
rps29				efnb2.L				spg11.L
rpl36.S				LOC108711813				lnx2.L
rps20.L				phc1.S				kazn.S
col18a1.L				rps29				dlg3.S
gigyf1.L				rpl36.S				pxn.S
enc1.2.L				rps20.L				slc9a1.L
rps3.S				col18a1.L				usp22.S
dusp6.L				gigyf1.L				clic1.S
fbxo5.L				enc1.2.L				atxn7l3.L
asb7.S				rps3.S				bnipl.L
kmt2e.S				dusp6.L				fam171a1.S
kpna2.L				fbxo5.L				trit1.L
ago2				asb7.S				tmem104.L
rbm34.L				kmt2e.S				atp7a.L
rbm45.L				kpna2.L				mark1.L
kiaa1210.L				ago2				gtf3c1.L
LOC108697833				rbm34.L				ptges2.L
cited4.L				rbm45.L				smg8.S
cpeb2-like.L				kiaa1210.L				trafd1.L
abcb9.L				LOC108697833				znf521.S
cerk				cited4.L				vezt.L
maff.S				cpeb2-like.L				fam222b.L
elmo1.S				abcb9.L				depdc7.S
adgrg1.S				cerk				spdyc.L
hnrnpl.L				maff.S				bbs2.S
zc3h10.S				elmo1.S				prkcz.L
esg2-a				adgrg1.S				got2.L
sik3.L				hnrnpl.L				tpcn2.L
hist2h3d.L				zc3h10.S				hes7.2.S
Xetrov90029311m.S				esg2-a				fam63a.L
LOC108715449				sik3.L				pak4
ctc1				hist2h3d.L				spire2.S
chn1.L				Xetrov90029311m.S				ccdc64.S
fnbp4.L				LOC108715449				tmem158.L
fgd1.L				ctc1				rasl10b.L
c6orf62.L				chn1.L				LOC108718648
arfgap3.S				fnbp4.L				rnf19a.L
fam193a.L				fgd1.L				phf19.S
klf6.L				c6orf62.L				hexdc.L
ncstn.S				arfgap3.S				akap9
paaf1.S				fam193a.L				usp16.S
ncl.S				klf6.L				LOC108707483
zc3h10.L				ncstn.S				arhgef17.L
exosc5.L				paaf1.S				slc39a13.S
rbl1.S				ncl.S				tank.S
rps16.L				zc3h10.L				abhd17b.L
loc100494818.L				exosc5.L				zbtb24.L
rps19.S				rbl1.S				ikzf2.L
cep250.S				rps16.L				slc20a1.S
midn.S				loc100494818.L				gsap.L
rpl8.S				rps19.S				scarb2.S
aasdh.L				cep250.S				c12orf66.S
ago2.L				midn.S				f2rl1.S
scube2.L				rpl8.S				lhx5.L
isy1.L				aasdh.L				lnx2
mat2a.L				ago2.L				lzts3.L
rab26.L				scube2.L				mtbp.S
auts2				isy1.L				fbxo31.L
fth1.S				mat2a.L				eomes.S
cenpc.L				rab26.L				tnrc18.S
gpatch8.S				auts2				svil.L
rps20.S				fth1.S				tbc1d8
brd2.S				cenpc.L				tiam1.S
znf268.L				gpatch8.S				muc3a
nop10				rps20.S				fer.S
kiaa0232.S				brd2.S				loc100491633.L
dgkd-like.S				znf268.L				ttbk2.L
setd1b.S				nop10				srgap2.L
sox17b.1.S				kiaa0232.S				chfr.S
LOC108715080				dgkd-like.S				akap13.L
rps25.L				setd1b.S				atad3a.S
midn.L				sox17b.1.S				pigg.S
wdr43.L				LOC108715080				zbtb6.S
tle1				rps25.L				rnf149.L
dzip1.L				midn.L				usp44.S
fzd7.S				wdr43.L				csk.L
hnrnpu				tle1				b4galt5.L
sp5l.S				dzip1.L				cmtm4.S
fam174b.L				fzd7.S				sertad2.S
mlec.S				hnrnpu				hic2.L
h3f3b.L				sp5l.S				stxbp6.L
actr6.L				fam174b.L				nsd1.S
ddias				mlec.S				Xelaev18016684m
rxrb.S				h3f3b.L				kbtbd8.S
prkca.S				actr6.L				dph6.L
trim71.S				ddias				bicc1.S
inpp5k.L				rxrb.S				atxn7l1.S
slc26a11.L				prkca.S				glce.L
h2afz.L				trim71.S				alg11.L
zfand4.L				inpp5k.L				zfyve9.S
rpl37a.L				slc26a11.L				ipo13.S
kcne5.L				h2afz.L				inpp5b.L
hp1bp3.L				zfand4.L				gga1.L
xetrov90011961m.S				rpl37a.L				krit1.L
scin.L				kcne5.L				ripk1.L
fus.L				hp1bp3.L				gid4.S
parp1.L				xetrov90011961m.S				gramd2b.S
rpl13a.S				scin.L				fdxacb1.L
rps6kb1.L				fus.L				mbd4.L
kat5.L				parp1.L				camkk1
hnrnpu.S				rpl13a.S				otud4.L
itga5.L				rps6kb1.L				rab7a.S
kmt2a.S				kat5.L				kpnb1.L
timm23				hnrnpu.S				garem1.S
rere.S				itga5.L				ccny
fam222a.L				kmt2a.S				rad17.L
elf2.S				timm23				maz
rplp2.L				rere.S				mfsd6.L
adam33.L				fam222a.L				nsd1.L
krt8.L				elf2.S				vps37a.S
MGC114789				rplp2.L				MGC76328.S
ctps1.S				adam33.L				uspl1.S
iffo2				krt8.L				med13l.S
efna1.L				MGC114789				fyn.S
metrnl.S				ctps1.S				plcg1.L
rad51ap1.L				iffo2				prdm10.L
tsc22d2.S				efna1.L				usp8.L
uqcr11				metrnl.S				snx13.L
zbtb2.S				rad51ap1.L				rb1cc1.L
sema3f.L				tsc22d2.S				MGC76328.L
aurkb.L				uqcr11				slc41a1
ubc.L				zbtb2.S				mast2
pdia4.L				sema3f.L				rita1.S
fau.S				aurkb.L				atl3.L
rnf38.S				ubc.L				txndc9.L
runx1t1				pdia4.L				tert.L
pls3.L				fau.S				tns3.L
ost4				rnf38.S				abcb6.L
gnb2l1				runx1t1				arl10b.L
vdac1.L				pls3.L				trak1
sema4c.S				ost4				pou2f1.L
rpl38.S				gnb2l1				btbd9.S
lamc1.S				vdac1.L				usp38.L
tmem111.L				sema4c.S				znf238.2.L
rps29.S				rpl38.S				batf3.S
mzt1.S				lamc1.S				lrriq1.L
ufc1.S				tmem111.L				atp8a1.S
zswim6				rps29.S				zfpm1.S
scamp5.L				mzt1.S				plxna3.S
lhx1.L				ufc1.S				LOC108699992
rpl28.S				zswim6				tmem60.L
actg1.L				scamp5.L				wrap73.L
gigyf1.S				lhx1.L				gcc1.L
hhex.L				rpl28.S				kif22.L
srsf5.L				actg1.L				golph3l.S
rpl23a.L				gigyf1.S				nuak2.S
rbm5.S				hhex.L				prkcz.S
eif3a.L				srsf5.L				rmnd5a.L
sec61g.L				rpl23a.L				pms2.L
phrf1.S				rbm5.S				golga1.L
rps6.S				eif3a.L				Xelaev18026877m
yipf6.L				sec61g.L				cdc25a.L
LOC108706318				phrf1.S				Xelaev18021540m
cd82.S				rps6.S				nfatc3.L
pin4.L				yipf6.L				c6orf120.L
krt18.L				LOC108706318				Xelaev18014049m
ybx1.S				cd82.S				rel.S
ctbp2l.L				pin4.L				rsbn1.L
psmc5.L				krt18.L				cep85l.L
usp1.S				ybx1.S				gfod1
fam162a.S				ctbp2l.L				trappc4.S
rps15.S				psmc5.L				dolpp1
kansl2.L				usp1.S				blcap.S
phactr4.L				fam162a.S				nck1.L
rps3.L				rps15.S				ccdc3.L
clcn3.L				kansl2.L				cnppd1.S
selenok.L				phactr4.L				lpgat1.S
sf3b6				rps3.L				tmbim1.S
LOC108703741				clcn3.L				wdr60.L
ier3ip1.L				selenok.L				slc35f5.L
dynlrb1				sf3b6				znf282.S
plk4.L				LOC108703741				nanp.L
mgea5.L				ier3ip1.L				tor1a.S
cdc42ep4.S				dynlrb1				furin.S
actg1.S				plk4.L				e2f4.L
rpl18a.L				mgea5.L				rpa2.S
tfdp1.L				cdc42ep4.S				glce.S
sgk1.S				actg1.S				pwwp2b.L
mapre1.S				rpl18a.L				map4k5.S
slc25a5.L				tfdp1.L				gga1.S
nadk2.S				sgk1.S				kctd9.L
pqbp1.L				mapre1.S				map3k10.L
sfpq.S				slc25a5.L				mthfr.L
Xelaev18002313m				nadk2.S				helq.S
rps10.L				pqbp1.L				edem3.L
rpl15.L				sfpq.S				ccdc171
h3-3b				Xelaev18002313m				arhgap26.L
mtfr1l.S				rps10.L				ippk.S
snrpg.S				rpl15.L				mink1
hmgn3.S				h3-3b				gse1.S
sem1				mtfr1l.S				lysmd4.L
rps27a.L				snrpg.S				slc8a3.L
rhebl1.L				hmgn3.S				dgkh-like.S
pdlim1.S				sem1				rasef.S
rpl6.L				rps27a.L				klf4.L
c21orf91.L				rhebl1.L				rab4b.L
ncapd2.S				pdlim1.S				trim39.L
txndc15.L				rpl6.L				rnf41.L
esyt2.L				c21orf91.L				pld2.L
rpl9.L				ncapd2.S				usp31.S
myo10.2.S				txndc15.L				mfsd14a
hnrnpa3.S				esyt2.L				appbp2.S
kcnk5				rpl9.L				pex1.L
srrt.L				myo10.2.S				cyld.L
Xetrov90014406m.L				hnrnpa3.S				per2.L
LOC108715139				kcnk5				tubgcp5
LOC108707719				srrt.L				sowahb.S
rpl22.L				Xetrov90014406m.L				slc39a14.L
gtf2b.L				LOC108715139				ccdc117
gsk3a.L				LOC108707719				kdf1.S
magoh.L				rpl22.L				ccdc107
hnrnpk.L				gtf2b.L				tyro3.L
cldn4.L				gsk3a.L				acot12.L
setd5				magoh.L				sntg1.L
MGC82657				hnrnpk.L				LOC108717147
ppia.L				cldn4.L				pcyox1l.L
ilf3.L				setd5				alg1.L
safb.L				MGC82657				kiaa0100.L
rarg.S				ppia.L				LOC108710728
hnrnpdl.S				ilf3.L				lefty.S
arid4a.L				safb.L				rin3.L
ube4a.L				rarg.S				nr2f1.L
h2afz.S				hnrnpdl.S				pip5kl1.S
snrnp200.S				arid4a.L				vps50.L
ckap4.L				ube4a.L				eomes.L
mtf2.S				h2afz.S				nlk.S
npm1.L				snrnp200.S				noct.S
lamc1.L				ckap4.L				tdrd15.L
tceb3.S				mtf2.S				f2rl1.L
ptbp1.L				npm1.L				exoc8.S
sf3b2.S				lamc1.L				e2f4.S
psmc6-b				tceb3.S				LOC108699305
anp32e.L				ptbp1.L				dguok.L
vps25.L				sf3b2.S				mphosph9.L
LOC503678				psmc6-b				casp9.S
nucks1.S				anp32e.L				trim8
cbs.L				vps25.L				emilin2.L
cfap36.L				LOC503678				grhl1.L
tra2a.L				nucks1.S				sbf2.S
srsf11-like.S				cbs.L				abl2.L
myl12b.S				cfap36.L				bix2.L
no38				tra2a.L				acaca-like.S
cldn6.1.S				srsf11-like.S				znf462.L
sri				myl12b.S				plag1.S
cox7c.L				no38				LOC108714686
eif4e2.L				cldn6.1.S				znf335.L
tmed8.S				sri				phf3.S
znf106.L				cox7c.L				b3gnt5.L
selenow1.L				eif4e2.L				nr3c2.L
ubap2.S				tmed8.S				mov10l1.L
hnrnpa0.L				znf106.L				LOC108705734
sox17a.L				selenow1.L				grk3
acta2.L				ubap2.S				sh2b3.L
cwc25.L				hnrnpa0.L				clns1a.L
LOC100191024				sox17a.L				lrrc16a.L
MGC81393				acta2.L				srebf2.S
otx2.L				cwc25.L				habp4.L
sgk1.L				LOC100191024				ankrd54.L
rps25.S				MGC81393				slc9a1.S
rab40b.L				otx2.L				tbc1d30.L
phf5a.L				sgk1.L				josd1.L
snrpd1.L				rps25.S				pik3ca.L
ski.L				rab40b.L				wnt5b.L
rhov.L				phf5a.L				ptpn3.S
pabpc1.S				snrpd1.L				pisd.L
hnrnpa3.L				ski.L				rasl11b.L
khdrbs1.L				rhov.L				abhd13.S
med13.L				pabpc1.S				ttc9.L
ddx39				hnrnpa3.L				cacna2d1.S
igf2bp3.S				khdrbs1.L				pwwp2b.S
anxa1.S				med13.L				fgf8.L
nop16.L				ddx39				akap11.L
gatad2a.S				igf2bp3.S				vldlr.L
srsf4.L				anxa1.S				ei24.S
oaz1.S				nop16.L				nck2.S
hsf2.2.L				gatad2a.S				fhdc1
sec61g.S				srsf4.L				asap1
ilf2.L				oaz1.S				sos1.S
sbno1.L				hsf2.2.L				Xelaev18008577m
rpf1.L				sec61g.S				larp6-like.1.L
clcf1.L				ilf2.L				ppp3cc.L
rhebl1.S				sbno1.L				lrrc41.S
syf2.S				rpf1.L				selenon.S
odc1.S				clcf1.L				nek3.S
elob				rhebl1.S				mpp5.S
tomm70a.S				syf2.S				spred3.S
eif1b				odc1.S				hpca.L
cript.S				elob				otud7a.L
mlec.L				tomm70a.S				zbtb14.L
fam32a.L				eif1b				zfyve9.L
tulp3.L				cript.S				adcyap1.S
nsa2.L				mlec.L				tbc1d14.L
psmd1.S				fam32a.L				bambi.S
nop58.S				tulp3.L				dsel.L
elavl1.S				nsa2.L				tmem57.L
pcnp.S				psmd1.S				klhl13.L
rpl35				nop58.S				mgat2.S
cuta.L				elavl1.S				plekhg4.L
u2af1.S				pcnp.S				nadk.S
sap18.L				rpl35				LOC108719634
rpl7l1.L				cuta.L				kctd3.S
hnrnpa2b1.L				u2af1.S				tradd.L
gnl3.L				sap18.L				c15orf39.S
hmgn3.L				rpl7l1.L				atl2-like.S
phf5a.S				hnrnpa2b1.L				elmsan1.S
vezf1.S				gnl3.L				snai1.L
gnas.L				hmgn3.L				rab33b.L
tomm5.L				phf5a.S				sec24b.S
sumo2.L				vezf1.S				fam46b.L
rps12.S				gnas.L				wdr90.L
hnrnph1.S				tomm5.L				c1galt1.S
hnrnpk.S				sumo2.L				cmip.L
sec13.S				rps12.S				ercc6l2.L
dcun1d3.L				hnrnph1.S				nptx2.S
psmc5				hnrnpk.S				klhl23.L
ctbp2.S				sec13.S				usp46.L
ddx47.L				dcun1d3.L				Xelaev18010890m
cst3.S				psmc5				slc35a5.S
dhx15.L				ctbp2.S				scai
mrto4.S				ddx47.L				sipa1l3.L
erh.L				cst3.S				mapre3.L
hnrnpll				dhx15.L				vangl2.S
znf638.L				mrto4.S				wasll.L
nop10.S				erh.L				vps18.S
bcas2.L				hnrnpll				pex11a.L
cited4.S				znf638.L				saysd1.L
paxip1.L				nop10.S				prmt5.S
epcam.L				bcas2.L				blm.L
ubb.S				cited4.S				styk1.S
phc1.L				paxip1.L				slc8b1.S
thoc7.S				epcam.L				gmfb
hnrnpm.L				ubb.S				eda.L
arf4				phc1.L				kcnj5.L
prdm15.S				thoc7.S				socs1
tuba1c.L				hnrnpm.L				xzar2
tnpo3.L				arf4				lrriq3.S
ssbp3.L				prdm15.S				pigc.L
LOC495376				tuba1c.L				pik3cb.S
epcam.S				tnpo3.L				otud7a.S
MGC84691				ssbp3.L				mex3b.L
rpl6.S				LOC495376				MGC85058
cdk9.L				epcam.S				sox3.S
ebna1bp2-a				MGC84691				socs5.S
gpcpd1.L				rpl6.S				bach1.S
nol7.L				cdk9.L				ext1.L
snrpd3.S				ebna1bp2-a				LOC108711716
ran.S				gpcpd1.L				tmcc3.L
ankrd11.L				nol7.L				gas2l1.S
selt.S				snrpd3.S				sema4d
psmd6.L				ran.S				cry4.L
nucks1.L				ankrd11.L				ppp4r1l.L
hnrnpa0.S				selt.S				Xelaev18039594m
ndc80.S				psmd6.L				keap1.L
nfkbia.L				nucks1.L				lmo4.2.S
pmpca.S				hnrnpa0.S				tesk2.S
lrig3.S				ndc80.S				spsb3.S
rreb1.S				nfkbia.L				ttll11.L
elavl1.L				pmpca.S				clint1.L
sf3a2.S				lrig3.S				larp6-like.1.S
gabpa.L				rreb1.S				dcaf5.L
bzw1.S				elavl1.L				pgam1.S
u2af1.L				sf3a2.S				tbp.S
polr2c.S				gabpa.L				nde1.L
prmt1.L				bzw1.S				mtus1.L
anp32c.L				u2af1.L				ccdc50
hsbp1.L				polr2c.S				Xelaev18041793m
ftmt.S				prmt1.L				heg1.L
psmc6.S				anp32c.L				dact3.S
ddx23.S				hsbp1.L				atp9b.L
anp32e.S				ftmt.S				rasal2.S
LOC108701212				psmc6.S				fry.S
rbm33.S				ddx23.S				fkrp.L
hspe1.S				anp32e.S				eif2ak3.S
hmgb3.S				LOC108701212				tcp1.S
cdca4.L				rbm33.S				fbxl18.L
snrpd3.L				hspe1.S				map7d3.L
snrpf.S				hmgb3.S				fam208b.S
mfap1.L				cdca4.L				sh3bgrl.S
ranbp1.S				snrpd3.L				bach2.L
rbm8a.L				snrpf.S				LOC495407
h3-5.L				mfap1.L				wasll.S
znf706.L				ranbp1.S				disp1.L
arf1.L				rbm8a.L				gata2.L
msantd4.S				h3-5.L				ppp1cc.L
txnl4a.S				znf706.L				Xelaev18033527m
drap1.S				arf1.L				gtpbp2.L
sf3b2.L				msantd4.S				ulk2
hnrnpab.S				txnl4a.S				nodal1.S
atp5l.L				drap1.S				usp8.S
lsm8.L				sf3b2.L				arhgef12.S
ddx27.L				hnrnpab.S				mespb.S
hnrnph3.S				atp5l.L				wdr6.L
erh.S				lsm8.L				aak1
psmb6.L				ddx27.L				rhobtb1.L
sf1.S				hnrnph3.S				arv1.L
xnf7.S				erh.S				zfp36l2.1.S
cox5b.1.L				psmb6.L				camsap1
u2af2.S				sf1.S				nlrx1.L
eif1b.S				xnf7.S				pef1.S
odc1.L				cox5b.1.L				LOC100127794.L
skp1.S				u2af2.S				rhof.S
znf326.S				eif1b.S				lrp12.S
xnf7.L				odc1.L				ago1.S
btf3.L				skp1.S				LOC108705579
tnk2l.L				znf326.S				dip2a.S
taf13.S				xnf7.L				plch2
rrp8.L				btf3.L				LOC108706177
pno1.L				tnk2l.L				tmem171.L
tceb2.L				taf13.S				aco2.L
btf3				rrp8.L				slc35g1.L
eif4a3.L				pno1.L				polr3g.L
serinc5.S				tceb2.L				bri3.S
anxa7.L				btf3				ddhd1.L
kat6a.S				eif4a3.L				Xelaev18023494m
nosip.S				serinc5.S				fer.L
pithd1.L				anxa7.L				usp15.S
sugp2.L				kat6a.S				dgkh
hnrnpul2.S				nosip.S				egr1.L
LOC108701478				pithd1.L				rnf180.S
thoc1.L				sugp2.L				lpar5.S
imp4.S				hnrnpul2.S				nedd9.L
mxd3.S				LOC108701478				not.L
rbm22.S				thoc1.L				cttnbp2nl.L
rack1.S				imp4.S				sik2.S
pdcd5.L				mxd3.S				cse1l.S
dkc1.L				rbm22.S				filip1.L
drap1.L				rack1.S				scn1b.S
alyref.S				pdcd5.L				arhgef7.L
glul.S				dkc1.L				hip1r.S
btf3l4.S				drap1.L				ndst2.L
ddx21.L				alyref.S				ptpn21.S
snrpb.L				glul.S				gse1.L
sf3a3.L				btf3l4.S				ulk2.L
MGC81333				ddx21.L				mex3d.L
phf13.S				snrpb.L				nr3c2.S
fbl.L				sf3a3.L				srprb.L
sarnp.S				MGC81333				stmn1.S
snrpb.S				phf13.S				arhgap33.L
eif2s2.L				fbl.L				wnt11b.L
plrg1.S				sarnp.S				sirt3.2.L
dnajc8.S				snrpb.S				neu1.L
cpsf3.L				eif2s2.L				mgat3.L
chmp2a.S				plrg1.S				tfap2c.S
pfdn5.S				dnajc8.S				sel1l.S
pabpc1.L				cpsf3.L				alg6
rbm8a.S				chmp2a.S				znrf1.S
ehd1.L				pfdn5.S				LOC108703749
clta.L				pabpc1.L				arhgap11a.2.L
kiaa0907.L				rbm8a.S				dap.L
ddx39a.S				ehd1.L				Xelaev18004836m
fbxo9.S				clta.L				cse1l.L
snrnp27.S				kiaa0907.L				slc22a23.S
lmnb1.L				ddx39a.S				pxylp1.S
srp14				fbxo9.S				brca2.L
utp11l.L				snrnp27.S				htr5a.L
snrpa1.S				lmnb1.L				klhl7.S
tra2b.L				srp14				rgma.L
atp5g3.L				utp11l.L				emx1.2.L
tpm4.L				snrpa1.S				atxn1l.L
clta.S				tra2b.L				LOC108695571
pfn1.L				atp5g3.L				pax3.L
supt5h.S				tpm4.L				arhgap18.L
rtfdc1.L				clta.S				pias4.S
prc1.2.S				pfn1.L				lhx5.S
MGC80893				supt5h.S				bambi.L
cd9.S				rtfdc1.L				rnf219.L
ssna1.L				prc1.2.S				btbd3.L
gtf2f1.L				MGC80893				cct4.L
hnrnpc.L				cd9.S				atp10b
nop2.L				ssna1.L				mast2.S
prkra.L				gtf2f1.L				tbc1d4.S
sumo2.S				hnrnpc.L				etv3l.S
pcbp2.L				nop2.L				arhgef18.S
inip.S				prkra.L				zfpm1
srp72.S				sumo2.S				dll1.S
brk1.L				pcbp2.L				vcpip1.S
hnrnpc.S				inip.S				rgcc.S
eif2s3.L				srp72.S				fam8a1.L
hmgb1				brk1.L				gcnt1.L
glul.L				hnrnpc.S				zyg11b.S
ran.L				eif2s3.L				fam73a.L
arf4.S				hmgb1				atp8b1.L
snrnp40.S				glul.L				dock4.L
azin1.S				ran.L				prickle1.S
jup.L				arf4.S				ppp1r3b.S
csnk2b.S				snrnp40.S				pdgfb.L
cdc42.L				azin1.S				rai1.L
ctnna1.S				jup.L				tmem181.L
tma16.L				csnk2b.S				LOC108704627
alyref.L				cdc42.L				inf2.S
fubp1.S				ctnna1.S				trim8.L
ppdpf.S				tma16.L				lhfp.S
ezh2.L				alyref.L				aldh2.L
sugt1.L				fubp1.S				slc39a1l.L
snrpb2.L				ppdpf.S				tnfrsf19.S
sf3a1.L				ezh2.L				bix1.3.L
gnl3l.S				sugt1.L				inf2.L
glrx3.L				snrpb2.L				gpr160.L
dnaja2.L				sf3a1.L				arhgap20.L
hnrnpul2.L				gnl3l.S				tnrc6c.S
laptm4a.S				glrx3.L				pot1.L
ylpm1.L				dnaja2.L				myo1e.1.L
snrpc.S				hnrnpul2.L				aktip.S
pspc1.L				laptm4a.S				fam219b.L
gadd45a.L				ylpm1.L				st3gal2.1.L
dnaja2.S				snrpc.S				ppargc1a.L
eif2s2.S				pspc1.L				camsap2
mrps9.L				gadd45a.L				parp15
ncbp2.L				dnaja2.S				vcpip1.L
psma2.L				eif2s2.S				mfap3l.L
b9d1.L				mrps9.L				ip6k1.L
fxr1.S				ncbp2.L				muc22
ddx46.L				psma2.L				cdkl5.L
gtf2f2.S				b9d1.L				msantd3.L
nudc.L				fxr1.S				zc3h12b.L
lmnb1.S				ddx46.L				LOC100491090.L
rnf10.S				gtf2f2.S				grip2.L
sf3a3.S				nudc.L				sik2.L
smc3.S				lmnb1.S				cracr2b.S
csrp2bp.L				rnf10.S				cdca7
utrn.L				sf3a3.S				tnrc6c.L
nol12.S				smc3.S				slc25a43.L
cdv3.L								trerf1.S
klf8.L								prmt5.L
yod1.L								ankrd13c.S
idh1.S								tpst2.L
aaas.L								plxnb3.S
usp25.L								kctd9.S
arfgef2-like.L								bcl6.L
znf585a								kcnq5.L
ppp4r3b.L								tmtc2.S
gna13.S								birc7.S
snx5.S								neurl1b.L
dapk3.S								fam104a.S
mettl16.L								LOC108699965
cct6a.S								saxo2.L
pdpr.S								bach1.L
nras.L								adh5.L
mybl2.S								Xelaev18032680m
dusp11.S								zyg11b.L
alg10.S								mast4.S
mdm1.L								zcchc14.S
taf5.L								LOC108714685
map4k5								pdgfa.L
LOC108713105								r3hdm4.L
etv1.S								ttc31.L
hyal2.L								znf484.L
LOC108701074								kctd15.L
znf239								atf6b.L
sec24d.S								hoxc13.S
golga4.L								ythdc2.L
Xelaev18034023m								peak1.L
ppm1d								frmd4b.S
irf5.L								hs3st1
dck.1.L								cgnl1.S
ddx56.L								foxh1.L
cask.S								ralgps2.S
rab14.S								rgs4.S
spag1.S								cyld.S
cnnm2.L								zbtb25.L
ppp3ca.L								ephb1.S
dock5.L								Xelaev18019693m
actn4.S								cdc42se2-like.2.L
rad54l								rassf10.S
ythdf3.L								egr1.S
tulp4.L								tbc1d2b.S
myo9b.L								dapk1.S
nploc4.L								rnf152.L
pdpr.L								fbxo30.L
lman2.S								bix1.1.L
eif4g1.S								dync1li2.S
vps13a.L								kctd3.L
cxcr4.L								trerf1.L
strn								helb.L
osbpl8.L								sstr2.L
brpf3.S								sun1.S
cpd.S								tmem251-b
ppp4r3a.S								MGC85210
hmces.L								stard13.L
stag1.L								c11orf96.L
tm9sf1.S								rgmb.S
ccnh.L								bix1.2.L
lca5.L								smad7.L
naa15.L								lbh.S
pkd2.L								b9d2.L
znf407.L								mespa.S
rnf121.L								pik3cb.L
ncald.L								ccnb1.S
slmap.S								baz1a.S
map7d1.S								akap10.L
pds5b.S								josd1.S
prc1.S								sphk1.L
rbm27.S								not.S
bag4.S								ifngr2.1.L
wdr26.S								tanc1-like.S
flii.S								ap4e1.S
atg2b.L								gpr22l.S
pard6b.L								irf2.S
ykt6.L								limd2.S
atr.L								LOC108699131
man2a1.S								cdk5r2.S
cdc16.L								Xelaev18025328m
c5orf28.L								mb21d2.S
rab23.S								fgf8.S
mast3.L								dnajc13.S
gnl1.S								fgd6.S
katnb1.S								LOC108717918
pcnx1								ccdc71l.L
loc100158477.L								ssx2ip.L
nsun7.S								snrk.S
mob1a								Xelaev18038453m
traf7.S								celf4.L
lasp1								ccnb5.L
kif14.L								ccna1.L
arfgef1								nectin1l2.2.S
naa16-like.L								lurap1.S
plin2.S								btg4.S
nudt4.S								aco2.S
kif21a.L								anapc7.L
ift122.L								rspry1.L
desi2.S								dnajb14.S
slc30a2.L								tdgf1.3.L
pop1-like.L								pak7.L
cdkn2aip.L								fbxo43.S
atl2.L								menf.1.L
pkn2.L								tnfrsf10b.L
nradd.L								chmp1a.S
fcho2.S								ston2.S
pten.S								frmd6.L
sbf1.L								tspoap1.L
usp54.L								c11orf96.S
katnb1.L								ccnb1.L
mia3								akna.S
xylt2.L								btg4.L
ccdc68.S								bri3.L
r3hcc1l.L								ppargc1b.L
adam10.S								foxr1.L
zmym4.L								LOC108709443
gpn2.S								slc35a1.L
inpp5a.1.L								mob3c.S
rnf121.S								LOC108707354
llgl1.S								nipa2.S
clasp1.S								foxi4.2.S
dpy19l1.L								arhgap20
ptdss2.S								nhs.L
nnt.S								grhl1.S
Xelaev18028646m								szl
bod1l1								adamtsl1
zmym4.S								mespb.L
kcnab2.L								fbxo33.L
trim39								gpr75.L
mospd2.S								hprt1.L
eri1.L								MGC68639
prkaa1.S								styx.L
ptpn23.S								atp12a
map7d2.S								pgam1.L
ppm1e.S								LOC108705749
pigs.L								LOC108699405
fam91a1.L								hs3st1.L
znf609.S								fgf20.S
pard3.S								mex3b.S
grk5.S								LOC100491629.L
LOC100653495								sertad2.L
ptpn12.L								mitd1.L
itsn2.L								wnt6.L
usp53.L								LOC108708627
znf850								znf81.L
dr1.L								pxylp1.L
rraga.S								areg.S
trim3.L								klf2.S
stim2.S								hlf.S
tsc22d1.L								fgf3.S
whamm.L								tmem184a.S
tmem62.S								kank1.S
ivns1abp.L								aldh18a1.L
tubgcp3.S								MGC83539
golph3l.L								nodal.L
ubn2.S								akip1
wdfy1								foxe1.L
mtx2.L								atg9a.L
ube2k.L								c1orf116.L
slitrk5.S								dsel.S
cog3.L								trim2.L
ccna2.S								grhl3.L
smc6.L								pou5f3.3.S
abhd16a.L								plcl2.L
cul4b.S								prkd3.L
smagp.S								klb.S
Xelaev18000337m								pou5f3.3.L
rrm2.2.S								olfm1.S
wapl.S								ccndx.S
st3gal3.S								foxj1.S
rragc.L								szl.L
csnk1g3.L								arhgap20.S
clcn7.L								grhl3.S
exosc6.L								kremen2.L
cchcr1.L								Xelaev18003951m
ncln.S								hes7.1.S
dars2.L								foxh1.2.L
tbc1d22b.S
dgcr8
mycl.S
ulk4.L
mpp6.L
cdc14b.S
golga2.S
nacc1.L
atp9a
fam98a
sin3b.L
hebp2.S
mcrip1.S
rpn1.S
LOC108699095
phf3.L
lin9.S
helz.S
trpm7.L
LOC108705533
ganab
fam117b.S
ppp2r5e.L
foxn2.S
cdan1.L
gpatch2.L
herc3.L
iqce.L
adarb1.L
rnpepl1.L
ctdnep1.L
top1.2.S
LOC108719524
usp16.L
itsn1.L
ccnb2.S
rps6ka3.L
nup133.L
r3hdm1.L
sema3a.L
kcnk5.S
ncbp3
map4k4-like.S
chaf1a.S
inpp5f.L
nde1.S
ndst1.S
tnrc6b.S
tuba4.L
atp13a4.S
yes1.L
b3gnt2.L
dpf2.L
pdia6.L
extl3.S
c15orf39.L
socs6.L
tmem110.S
ccnl1.L
tsc1.L
lrch3.S
wasf3.L
tlk1.L
znf821.S
tspan14.L
fdx1l.L
kdf1.L
cenpi.L
grip1.S
ripor1.L
lemd3.S
LOC108704248
ywhag.L
kdm3b.L
pawr.L
tnpo1.S
klhl15.L
chd8.L
rabgef1.S
wfs1.S
rimklb-like.S
inpp4a.S
tle1.L
snx27.S
eml4.L
rptor.L
uxs1.S
rbfox2.S
epas1.L
itpr1.L
dnmbp.S
tbc1d4.L
ptgfrn.S
sept6.S
usp37.L
plxna1.S
socs5.L
kdm3a.S
LOC108719552
ninl.L
pxn.L
slc12a6.S
spsb1.S
qrich1.1.L
gpd2.L
mapkapk2.S
MGC84581
daam1.L
znf516.S
iqgap3.L
zdhhc5.L
trak2.L
plpp1.L
ambra1.S
fam214a.L
cdc42se2-like.1.S
hyls1.S
ppp1r12a.S
ccnl1
msl2.L
c19orf44.L
chst12.L
stx2.L
atg101.L
sin3a.L
cep164.L
p2rx4.L
ext1.S
phc3.L
gpr157.L
tmem255a.S
gabpb2.S
slc35e1.L
fbxo42.S
vps54.L
rabif.S
wdr59.L
zdhhc8.S
neil3.L
jade3.S
Xelaev18041216m
nos1ap
sytl4.S
sh3glb1.S
kiaa1671
keap1.S
lin54.S
adam9.S
dbnl.S
idh3a.S
mbp.S
samd4a.L
src.L
znf646.L
ubr2.S
ppfibp2
wdr45.S
adpgk.L
snx30.L
dvl3
csnk1e.S
dmtf1.L
gapvd1.S
map3k4.S
lonrf2.L
stk24.S
MGC84007
znf407.S
sys1.S
lcor.L
rlf.L
e2f7.L
hmgxb4.S
usp9x.L
tmem5.S
ckap2.S
ctsd.S
arl15.L
ankle2.L
siah1.L
impad1.L
[truncated: 1,444 more rows]

## Sheet: St11-12
List of all genes from the venn diagrams of genes temporally differentially expressed in endoderm and mesoderm lineages corresponding with figure 5B
Total				Increase				Decrease
Endo Only	Meso Only	Overlap		Endo Only	Meso Only	Overlap		Endo Only	Meso Only	Overlap
ripply2.S	gcfc2.S	msgn1.S		ripply2.S	hes8.L	msgn1.S		kif22.S	gcfc2.S	tuba4.S
LOC108700980	enkd1.L	sp5.L		LOC108700980	LOC100145533.L	sp5.L		rae1.S	enkd1.L	orc6.L
sstr2	ist1.S	pou4f1.2.L		sstr2	cmahp.L	pou4f1.2.L		wapl.L	ist1.S	dus1l.L
p2ry4.L	eif2b5.S	meis3.L		p2ry4.L	slc35a3.1.L	meis3.L		tpx2.L	eif2b5.S	mdm1.L
klb.L	arhgef39.L	axin2.S		klb.L	LOC108719743	axin2.S		sec24a.L	arhgef39.L	hbox10.S
Xelaev18003553m	xiap.L	sfrp1.L		Xelaev18003553m	ly6e	sfrp1.L		kiaa0430.S	xiap.L	ipo8
celf3.S	cul3.L	notch2.S		celf3.S	otog.L	notch2.S		zcchc8.L	cul3.L	mkrn3.L
LOC108715566	edc4.L	fzd4		LOC108715566	glb1l2.S	fzd4		pi4kb.L	edc4.L	ppp1r13b.L
opn5.2.L	ctu1.L	LOC108704696		opn5.2.L	LOC108719498	LOC108704696		atxn2l.S	ctu1.L	trpm7.L
tmprss2.1.L	banp.L	lamb1.L		tmprss2.1.L	loc100145533.S	lamb1.L		jmjd6.S	banp.L	LOC108699095
tmprss2.1.S	letm1.S	msx1.L		tmprss2.1.S	Xelaev18029603m	msx1.L		sbno1.S	nos1ap.L	hmces.L
gjb1.L	kcnab2.L	hoxd1.S		gjb1.L	tp63.S	hoxd1.S		gpatch4.L	letm1.S	itsn2.L
kifc3	gstcd.L	hmcn2		kifc3	slc16a9.S	hmcn2		phf3.L	kcnab2.L	rnpepl1.L
LOC100037118	ptdss2.L	sema6a.L		LOC100037118	ugt8.S	sema6a.L		kif20a.S	gstcd.L	lman1.L
b3galt1.L	igf2r.L	LOC108716735		b3galt1.L	atp12a.L	LOC108716735		sucla2.L	ptdss2.L	syap1.L
znf469.L	ubxn4.L	pvrl1-like.2.S		znf469.L	fcgbp	pvrl1-like.2.S		rbm26.S	igf2r.L	tyw3.L
tmem72.L	sh3bp1.L	nlrc4.L		tmem72.L	ppl.S	nlrc4.L		ilvbl.L	rhou.L	raf1.L
endoul2.L	pfkfb3.L	comt.2.S		endoul2.L	gck.L	comt.2.S		gna14.L	ubxn4.L	tmf1.L
LOC100135146.S	tgif2.L	trpv6.L		LOC100135146.S	mesp2.S	trpv6.L		MGC131268	sh3bp1.L	bag4.S
wnt8b.S	ccdc120	plod2.L		wnt8b.S	Xelaev18032572m	plod2.L		tmem33.L	pfkfb3.L	rwdd1.L
Xelaev18044644m	map7d1.L	LOC108704327		Xelaev18044644m	mcidas	LOC108704327		napa.S	tgif2.L	gtf2ird1.S
dhh.L	znf276.S	c8g.S		dhh.L	hoxd1.L	c8g.S		snx5.S	ccdc120	lrrfip2.L
crabp2.S	fam63a.S	szl.L		crabp2.S	syt1	szl.L		pum2.L	map7d1.L	ubac1.S
trpm6.L	wls.L	ttn		trpm6.L	frem1.L	ttn		ammecr1.S	znf276.S	csnk1g2.L
slc1a1.L	setd4.L	rnd3.S		slc1a1.L	LOC100486385.L	rnd3.S		pdcd10.S	fam63a.S	tceanc2.S
LOC108706987	grb2.S	cxcl12.L		LOC108706987	pnliprp1	cxcl12.L		arfgef1	wls.L	map2k7.S
Xelaev18003555m	specc1	dspp		Xelaev18003555m	tbx6.S	dspp		ehmt1.S	setd4.L	slc35b3
fgfrl1.S	ppa1.L	crabp2.L		fgfrl1.S	LOC108705880	crabp2.L		nol9.L	grb2.S	ccnb1.2.L
ripply2.1.S	pitpnc1.S	fzd10.S		ripply2.1.S	hes3.3.L	fzd10.S		pphln1.S	specc1	bloc1s6
ripply2.L	zfand3.S	mn1.S		ripply2.L	LOC100497061.L	mn1.S		nras.L	ppa1.L	mmadhc.L
Xelaev18011560m	natd1.L	p2ry11.L		Xelaev18011560m	hoxa11.S	p2ry11.L		rpa3.L	pitpnc1.S	LOC100301958
sp5.S	afg3l2	robo2		sp5.S	lrat.L	robo2		kpna3.L	zfand3.S	dcaf5.S
nrl.S	lonrf1.S	nr2f6.L		nrl.S	znf534.L	nr2f6.L		nampt.L	natd1.L	whamm.L
LOC108709100	prrg1.S	slc3a1.S		LOC108709100	vgll1.L	slc3a1.S		top3b.L	afg3l2	ctsd.S
slc7a5.L	cpped1.L	LOC108698034		slc7a5.L	slc45a3.S	LOC108698034		tmed7.L	lonrf1.S	shf.S
gbx2.2.S	plekhm2.L	Xelaev18012290m		gbx2.2.S	galnt12.L	Xelaev18012290m		exoc5.L	prrg1.S	megf11
flt1.L	agpat4.S	cntn1.S		flt1.L	hes9.1.S	cntn1.S		dusp11.S	cpped1.L	arih2.S
lypd6.S	bpgm.S	lmln		lypd6.S	vill.L	lmln		fam98b.L	plekhm2.L	gng10.L
LOC108712697	lrrc28.L	liph.L		LOC108712697	krt12.L	liph.L		tk2.S	agpat4.S	abhd16a.L
col13a1	prss36.L	lrp4.S		col13a1	p2rx1.L	lrp4.S		LOC100653495	bpgm.S	golim4.S
igf2.L	dscc1.L	myb.L		igf2.L	hes5.2.L	myb.L		cttn	lrrc28.L	taf5l.S
cga.L	fam98a	hes5.1.L		cga.L	fucolectin.S	hes5.1.L		dgcr8	prss36.L	cttnbp2.L
ankrd10	nin.L	slc26a4l.L		ankrd10	LOC398451	slc26a4l.L		stk11ip.L	dscc1.L	haus6.S
frzb2.S	fam171a1.S	trpv5.L		frzb2.S	cdx2.S	trpv5.L		tbc1d4.L	fam98a	pja2.S
pax3.S	ppp3cb.L	ppm1h.L		pax3.S	hoxa1.L	tll1-like.1.L		map7d2.S	nin.L	arfip1.S
mamld1.L	prelid2.L	tll1-like.1.L		mamld1.L	LOC108718065	ccdc129.L		loc733209.L	fam171a1.S	kiaa0226l.L
vav3.L	col4a3bp.S	MGC115585		vav3.L	atp13a-like.L	fut3.L		c18orf25.L	ppp3cb.L	dcaf10.S
eya1.L	hs2st1.L	ccdc129.L		eya1.L	ppl.L	hes5_X2.L		nedd1.L	prelid2.L	tada3.L
Xetrov90028420m.S	gpd2.S	fut3.L		Xetrov90028420m.S	spns1	flrt2.L		pkd1l1.L	col4a3bp.S	gramd1c.L
axin2	txlng.L	hes5_X2.L		axin2	parm1	epn3.L		usp24.L	hs2st1.L	plxna1.S
myo10.S	cc2d1b.S	flrt2.L		myo10.S	socs3.L	Xelaev18000128m		pacsin2.L	gpd2.S	ecsit.S
foxp4.S	e2f7.L	epn3.L		foxp4.S	prox1.S	abcb5		fzd8.L	txlng.L	lamp1.S
hnf1b.S	ca10.L	Xelaev18000128m		hnf1b.S	dipk1c.S	gli3.S		myof.1.L	chp1.L	nedd4l.S
fut4.L	usp19.L	abcb5		fut4.L	rab27a.S	gfpt1.S		tmem110.S	cc2d1b.S	grip1
LOC108713029	zfhx2.S	gli3.S		LOC108713029	loc100496187.L	iqca1.L		hook2.L	e2f7.L	pigh.L
chst5.S	anapc4.L	gfpt1.S		chst5.S	kif26a.S	Xelaev18039917m		atg2b.L	ca10.L	tmem131.L
LOC108706900	chst7.L	iqca1.L		LOC108706900	hes9-1.L	aox2		eya3.L	usp19.L	ccdc18.S
Xelaev18004377m	atg2b.S	Xelaev18039917m		Xelaev18004377m	prr18.S	rspo2.L		ppp3ca.L	zfhx2.S	slmap.S
Xelaev18046953m	pigt.L	aox2		Xelaev18046953m	hes5.5.L	sp7.S		nacc1.L	anapc4.L	smarcal1.L
tll1.S	gchfr.S	rspo2.L		tll1.S	hoxa9.L	slc18a1		avl9.L	chst7.L	fam110c.L
nts.L	katna1.S	sp7.S		nts.L	mcidas.L	gata2.L		trhd.S	atg2b.S	fam210a.L
prdm12.L	trim39	slc18a1		prdm12.L	tcaf1.L	Xelaev18027269m		znf239	map4k4-like.L	snx9.S
ncr3	pqlc2.L	gata2.L		ncr3	LOC108711745	capn8.2.L		polr2i.L	pigt.L	huwe1
slc38a8.L	ankrd28	Xelaev18027269m		slc38a8.L	socs1.L	xarp.L		cct6a.S	gchfr.S	umad1.L
Xelaev18003864m	slc39a9-like.1.L	capn8.2.L		Xelaev18003864m	f2rl2.L	notch2.L		wdr26.L	katna1.S	pigs.L
LOC108704705	pard3.L	xarp.L		LOC108704705	vtcn1.L	slc12a3.2.S		pou5f3.2.L	trim39	extl3.S
LOC108697952	ppm1e.S	notch2.L		LOC108697952	syt16.L	vwf.L		adnp.S	pqlc2.L	clasp1.L
LOC108717763	gpr180.S	slc12a3.2.S		LOC108717763	vsig8.L	b3gnt3.L		ddx3x.L	ankrd28	strn
gdap1l1.L	sh3pxd2b.L	vwf.L		gdap1l1.L	slc30a10.S	sytl1.S		rad54l2.L	slc39a9-like.1.L	cep83.L
tet2.S	cdt1.L	b3gnt3.L		tet2.S	sult6b1.5.L	cdc42se2-like.1.L		ube2k.S	pard3.L	lrp1.L
Xelaev18001208m	tmem242.S	sytl1.S		Xelaev18001208m	fut6.S	Xetrov90014299m.L		stxbp3.L	ppm1e.S	tmem184c.L
pros1.S	pnpt1.S	cdc42se2-like.1.L		pros1.S	adgrf1.L	slc1a7		tjp1.S	gpr180.S	slc9a3r1.L
Xelaev18006811m	pid1.S	Xetrov90014299m.L		Xelaev18006811m	syt13	id4.S		edrf1.S	sh3pxd2b.L	dbf4b.L
myo3b.L	mfn2.S	slc1a7		myo3b.L	znf185.L	nceh1.L		micu1.S	cdt1.L	mmp15.S
gata5.L	agpat5.L	id4.S		gata5.L	hes5.1.S	ahnak.L		dhx37.L	tmem242.S	ptpra.S
a2ml1.L	dda1	nceh1.L		a2ml1.L	xk81a1.S	fzd10.L		nf2.S	pnpt1.S	daam1.S
chrnb2.S	mad2l2.S	ahnak.L		chrnb2.S	aatk	hkdc1.S		lrrc1.L	pid1.S	slc10a7.L
calb1.L	tbc1d10b	fzd10.L		calb1.L	gng13.S	sytl2		ccnt2.S	mfn2.S	loc100126636.S
plcb4.L	LOC108704254	hkdc1.S		plcb4.L	Xelaev18036730m	stk40.L		tnpo1.L	agpat5.L	neurl4.S
hcrtr2.L	adcy7.L	sytl2		hcrtr2.L	syt8.L	a2m.S		ptgfrn.S	dda1	lrp1.S
pitx1.L	cdca7l.L	stk40.L		pitx1.L	nr6a1.L	nxpe2.L		csnk1g1.L	mad2l2.S	bod1l1.L
ube2g2.S	lrba.L	a2m.S		ube2g2.S	krt12.S	LOC108695829		ythdf3.L	tbc1d10b	znf585b.S
robo4.S	spata13.S	nxpe2.L		robo4.S	acpp	hpgd.L		manf.L	LOC108704254	arhgef18
fam46d.S	slc35a3.2.L	LOC108695829		fam46d.S	sidt1.L	post5.S		ptprf.S	adcy7.L	gpn2.S
lama1.L	actr1a.S	gli1.S		lama1.L	plekhg5.L	capn8.S		rabl6	cdca7l.L	svil.L
Xelaev18022564m	rfc1.L	hpgd.L		Xelaev18022564m	gdpd1.L	nr1i3.S		chaf1a.S	lrba.L	dck.1.L
ror1.L	tln2.S	post5.S		ror1.L	LOC108701787	crb2.S		spata2l.L	spata13.S	tmem115.L
mia.L	znf347.S	capn8.S		mia.L	cdx1.L	sh3d21.L		aldh3b1.L	slc35a3.2.L	grb10.S
mmel1.L	usp3.L	nr1i3.S		mmel1.L	LOC108701744	myc.S		fscn1.S	actr1a.S	gtdc1.S
Xelaev18003342m	man1a2.L	crb2.S		Xelaev18003342m	adck1.L	Xelaev18003060m		ctf1	rfc1.L	srgap2.L
slc3a1.L	inpp5f.L	sh3d21.L		slc3a1.L	gcnt4	gfpt1.L		plin2.S	tln2.S	tbc1d23.L
eps8l3.S	cog1.S	myc.S		eps8l3.S	fam177b.L	vangl1.L		hmg20b.S	znf347.S	cep41.S
bsnd.L	LOC108699273	trappc10.L		bsnd.L	eps8l1.L	LOC108719420		dnaja4.1.L	usp3.L	ncald.L
ldlrad4.L	necap1.S	Xelaev18003060m		ldlrad4.L	vill.S	cfh.L		zbtb49.L	man1a2.L	ppfibp2
pzp-like.2.L	tlk1.L	gfpt1.L		pzp-like.2.L	dync1i1	Xelaev18012294m		zdhhc5.L	inpp5f.L	daam1.L
pou4f1.2.S	timeless.S	vangl1.L		pou4f1.2.S	cdx4.L	Xelaev18005230m		irf6.2.S	cog1.S	dock5.L
LOC108706988	zranb3.L	LOC108719420		LOC108706988	ahnak	post10.L		pop1-like.L	LOC108699273	dgkq.L
ptk6.L	birc6.L	cfh.L		ptk6.L	ttc39a.L	adam9		shkbp1.L	necap1.S	mpp6.L
slc2a2.S	hells.L	Xelaev18012294m		slc2a2.S	gby.L	pim1.S		mettl9.L	tlk1.L	inpp5b.L
kif21b	zw10.S	Xelaev18005230m		kif21b	phka2-like.S	mgst1.L		dpy19l1.L	timeless.S	r3hdm1.L
ece2.L	faah2	post10.L		ece2.L	greb1.L	rab3d.L		socs5.L	zranb3.L	nup54.L
Xelaev18007877m	asap1.S	adam9		Xelaev18007877m	ag1.S	greb1l		lman2.S	birc6.L	coq10a.L
serpind1.L	tmem184b.S	pim1.S		serpind1.L	ttc22.L	ell.L		irak1.L	hells.L	mrpl1.L
faah.3.S	slc30a4.L	mgst1.L		faah.3.S	agr2.S	tgfbr1		zcrb1.L	zw10.S	stambpl1.L
foxe1.L	dcp1a.S	rab3d.L		foxe1.L	Xelaev18012620m	dynll1.L		cpd.L	faah2	bves.L
vav1	sptbn1.L	greb1l		vav1	col16a1	rps6ka4.L		knstrn.L	asap1.S	fbxo25.L
Xelaev18005504m	dctn2.S	ell.L		Xelaev18005504m	LOC108719446	actn1.L		tll2.L	tmem184b.S	top1.2.S
adamts18.L	sec31b.S	ets1.L		adamts18.L	rbbp8nl.S	rbm47.L		nfkbia.L	slc30a4.L	mtmr10.L
ncmap.S	st3gal-iii	tgfbr1		ncmap.S	itln1.L	nxpe4		thoc7	dcp1a.S	zar2.L
msgn1.L	uap1.S	dynll1.L		msgn1.L	irf5.S	prpsap1.S		hif1an.S	sptbn1.L	glmp.L
meis3.S	atrn.L	rps6ka4.L		meis3.S	gcm1.L	abcc4		triap1.L	dctn2.S	tmf1.S
nrn1.L	sdha.S	actn1.L		nrn1.L	itpr3	cpt1a.L		chd7.L	sec31b.S	pdpr.L
egflam.S	cntrl.L	rbm47.L		egflam.S	kxd1.S	clcnkb		ganab	st3gal-iii	dennd5b.L
hnf1b.L	ccdc67.L	nxpe4		hnf1b.L	rbm20.L	post.L		slc31a2.S	uap1.S	scap.L
Xelaev18005962m	lnx1.L	prpsap1.S		Xelaev18005962m	LOC100037903.1	LOC108706721		eef1akmt3.L	atrn.L	tasp1.S
mmrn2.S	dcaf1.L	abcc4		mmrn2.S	slc2a12.L	slc44a3.L		zhx2	sdha.S	helz.L
slc4a10.S	osbpl11.S	cpt1a.L		slc4a10.S	trpm7	tmem52.L		sec24d.S	cntrl.L	atr.L
b3galt5	tbc1d9b	clcnkb		b3galt5	ociad2.S	mllt10.L		shcbp1.L	ccdc67.L	rnpepl1.S
prrx1.L	elmod3.S	post.L		prrx1.L	tnni2.L	palm.S		scoc.S	lnx1.L	pdpr.S
Xelaev18003609m	tctn1.L	LOC108706721		Xelaev18003609m	dnah7.L	LOC108714284		cdv3.L	dcaf1.L	znf618.S
sv2b-like.S	tubg1.S	slc44a3.L		sv2b-like.S	lrpprc.S	rab15.L		cep164.L	osbpl11.S	fam46b.L
ventx1.1.S	ttc7b.L	tmem52.L		ventx1.1.S	tnfrsf11a.S	post7p.L		cchcr1.L	tbc1d9b	dcp1a
LOC108700650	madd.L	mllt10.L		LOC108700650	LOC108704529	dynll1.S		uprt.L	elmod3.S	baiap2l1.S
slc28a3.L	tsnare1l.S	palm.S		slc28a3.L	armc4.S	cbx1.L		fam122a.L	tctn1.L	ubr2.S
nuak1.L	taok1.L	LOC108714284		nuak1.L	gnb3.S	Xelaev18022166m		ccne1.S	tubg1.S	arl15.L
aldh1a3.L	tor2a	rab15.L		aldh1a3.L	ncam1.L	gpatch8.L		wdr82.L	ttc7b.L	fam210a.S
il6r.S	agap1	post7p.L		il6r.S	ccdc63.S	msx2.L		fam26d.L	tgif2.S	rab14.S
dbx2.L	casp2	chp1.L		dbx2.L	aim1.S	scel.L		iqgap1	madd.L	hdac4.S
arhgap4.S	sec22a.L	dynll1.S		arhgap4.S	Xelaev18000386m	LOC108704134		zfand6.L	tsnare1l.S	lin9.L
gngt2.1.S	scd.L	cbx1.L		gngt2.1.S	LOC108705922	tlr2		tstd2.S	taok1.L	mgat4a.L
Xelaev18029198m	mtrr.L	Xelaev18022166m		Xelaev18029198m	fam3d.S	dgkd-like.L		atp2c1	tor2a	zar1l.L
vat1l.L	fbxo42.S	gpatch8.L		vat1l.L	slc3a2	dgka.L		golga2.S	agap1	slc2a10.S
adamts5.L	taf1d	msx2.L		adamts5.L	wdr66.L	rictor.S		lrrk1.L	casp2	csk.L
dlk2.S	zfand3.L	scel.L		dlk2.S	xmc.L	tdg.S		ift122.L	sec22a.L	MGC81661
tecta.1.L	abhd11.L	LOC108704134		tecta.1.L	xk81a1.L	LOC101731753.L		sbf1.S	dnmbp.L	alkbh8.S
twist1.L	fpgs.S	tlr2		twist1.L	fa2h.L	lmo4.1.S		ocrl.L	scd.L	gab2.L
rtn4rl1.L	pard6b.L	dgkd-like.L		rtn4rl1.L	hdac11	slc29a3.L		nnt.S	mtrr.L	LOC108714350
gpd1.L	cry-dash.L	dgka.L		gpd1.L	glipr2.S	cdk1.L		atxn2.S	fbxo42.S	cenpa.L
plppr4.S	LOC108704624	rictor.S		plppr4.S	rgl1	fam13b.L		alg10.S	taf1d	spag9
lfng.L	lace1.L	tdg.S		lfng.L	b4galt1	nxpe3l.6.L		fam91a1.L	zfand3.L	pde4dip
fam179a.S	tcf19.L	LOC101731753.L		fam179a.S	slc17a9.S	pde4d		neil3.L	abhd11.L	snx13.S
fkbp9.L	plekha1.S	lmo4.1.S		fkbp9.L	LOC108709394	phip.L		btaf1.L	fpgs.S	tor1b.S
hgf.S	klhl18.S	slc29a3.L		hgf.S	rab25.L	casd1.L		gpatch11.L	pard6b.L	lrrc58.S
LOC100491930.L	suv39h1.L	cdk1.L		LOC100491930.L	lgalsl.L	birc2.S		aldh7a1.S	cry-dash.L	tp53i11.S
ventx1.1.L	armt1.L	fam13b.L		ventx1.1.L	pde9a.L	golm1.L		ppp1r9a.S	LOC108704624	sema3c.S
cdh2.S	ern1.S	nxpe3l.6.L		cdh2.S	rbbp8nl.L	wsb1.L		brwd3.L	lace1.L	rcor2.L
egflam.L	usp13.L	rhou.L		egflam.L	nr1d2.L	nedd9.L		pomgnt1.S	tcf19.L	pold2.L
chp1.S	osbpl9.S	pde4d		chp1.S	samd15.L	krt.L		stag1.L	plekha1.S	birc6.S
fut6	hps5.L	phip.L		fut6	Xelaev18003636m	fzd2.S		man2a1.S	klhl18.S	loc734029.L
arhgef38.S	phlpp1.S	casd1.L		arhgef38.S	degs3.L	Xelaev18029191m		c18orf8.L	suv39h1.L	bora.S
col3a1.S	dph5.S	birc2.S		col3a1.S	Xelaev18038969m	emp2.L		c12orf49.L	armt1.L	fastkd5.L
Xelaev18044674m	oma1.S	golm1.L		Xelaev18044674m	gm39120	gen1		med26.L	ern1.S	fryl.S
heca.L	heatr5a.L	wsb1.L		heca.L	anxa9.L	plcb4.S		utrn.L	usp13.L	ints14.S
tspan5.L	LOC105947450.S	nedd9.L		tspan5.L	b4galnt3.L	prkx.L		ryk.S	gyltl1b.L	tuba4.L
ebf3.L	lamp1.L	krt.L		ebf3.L	krt18.3.S	march7.S		phf3.S	osbpl9.S	tor1b.L
msx1.S	atg4c.S	fzd2.S		msx1.S	degs3.S	dedd2.L		atp2b1.S	hps5.L	plin3.L
apela.S	MGC115510	Xelaev18029191m		apela.S	tmem56.2.L	tril.L		npm3.S	phlpp1.S	wnk2.L
Xelaev18012292m	jak1.L	emp2.L		Xelaev18012292m	LOC100486385.S	slc30a8.L		pum2.S	dph5.S	znf182
fam83b.L	nhej1.S	gen1		fam83b.L	evx1.L	hes6.1.L		MGC83673	oma1.S	abr.S
isl1.L	telo2.L	plcb4.S		isl1.L	trabd.S	myo5c.L		tgif1.L	heatr5a.L	cebpg.L
sh2b2.S	dgkz	prkx.L		sh2b2.S	kctd15.S	myc.L		atp9a	LOC105947450.S	thada
darmin.L	LOC108719558	march7.S		darmin.L	bpgm.L	akap2.L		nkrf.L	lamp1.L	csnk1g3.S
pde9a	ldlr.S	dedd2.L		pde9a	p2ry11.S	aim1l.L		MGC80416	atg4c.S	ubl3.S
scn5a	lpp	tril.L		scn5a	stard4.L	mypop.S		mgat4a.S	MGC115510	sos1.L
rgma.L	sorbs1.L	slc30a8.L		rgma.L	post9p.L	kif11.L		dnal4.S	jak1.L	mex3b.S
otop3.L	fut8.L	hes6.1.L		otop3.L	bmper.L	srrd.L		map4k5	nhej1.S	jak2.L
meis2.S	st7.L	myo5c.L		meis2.S	sh3rf2.S	xarp-like.S		ercc8.S	telo2.L	fzd7.S
bsnd.S	LOC108699944	myc.L		bsnd.S	krt18	arrdc3.L		mios.L	dgkz	ankrd35.L
loc548390.L	dennd1a.L	akap2.L		loc548390.L	lgalsl.S	loc108718659.S		shprh.S	LOC108719558	enpp4.L
crhr1.2.L	maz	aim1l.L		crhr1.2.L	rasal1.L	LOC108704672		tnfaip1.L	ldlr.S	pwwp2b.S
grhl2.L	gde1.L	mypop.S		grhl2.L	cdx1.S	pbx2.S		bod1l1	lpp	gpr137c.S
nostrin.L	rnf123.L	kif11.L		nostrin.L	cxcl12.S	slc45a3.L		magi1.S	sorbs1.L	slc22a15.2.S
frzb2.L	MGC130950	srrd.L		frzb2.L	ovol1.L	chd2.L		ctbp1.S	fut8.L	plxna1.L
vwde.L	tom1.S	xarp-like.S		vwde.L	gk.L	slc35d1.L		ubac2.L	st7.L	pacsin3.L
mid1.L	sds.L	arrdc3.L		mid1.L	rpe65.S	cdk1.S		gipc2.S	LOC108699944	arntl.S
foxi4.2.L	mbtps2.L	loc108718659.S		foxi4.2.L	c6orf132	krt8.S		bptf.S	dennd1a.L	smtnl2.S
scel	pla2g12a.S	LOC108704672		scel	bicd1	ubtd1.S		cdc23.S	maz	uxs1.S
dscaml1.L	homez.L	pbx2.S		dscaml1.L	MGC80993	c12orf45.S		snx17	gde1.L	pdzd8.S
meox2.S	ehbp1	slc45a3.L		meox2.S	btc.S	march6.L		gpatch2.L	rnf123.L	tvp23b.S
Xetrov90020447m.S	LOC108704645	chd2.L		Xetrov90020447m.S	znf185.S	ag1.L		raver2.L	MGC130950	zcchc11.S
LOC108708063	mink1.L	slc35d1.L		LOC108708063	LOC108715628	eef1a1.L		lonrf2.L	tom1.S	tulp4.L
iqsec3.L	shf.L	cdk1.S		iqsec3.L	creb3l4.L	trim29.L		ccar1.L	sds.L	ralb.L
notum.S	flnb	krt8.S		notum.S	rock1	chpf.L		sin3a.L	mbtps2.L	zc3h3.L
chst3.L	dgkq.S	ubtd1.S		chst3.L	stard10.S	cfap77		cand1.S	pla2g12a.S	fopnl.L
b3gnt4.S	cep70.L	c12orf45.S		b3gnt4.S	tmem56.L	LOC108709519		pik3c3.S	homez.L	tbc1d12.L
ntn3.L	angel1.L	march6.L		ntn3.L	gopc.L	rab34.L		znf639.S	ehbp1	rassf2.L
cfd.L	atp6v0a1.S	ag1.L		cfd.L	b4galnt3.S	p4hb.L		yrdc.L	LOC108704645	helz.S
nos1.L	zic2.S	pdk4.S		nos1.L	pprc1	tmem45a.L		Xelaev18042112m	mink1.L	dck.1l.L
emid1.L	pkmyt1.S	eef1a1.L		emid1.L	esrrg.S	litaf.S		fzd7.L	shf.L	xzar2
pde1b.L	eps8.S	trim29.L		pde1b.L	loc108648340.L	lrp5.L		gnl1.S	flnb	pik3c2a.L
LOC108713036	ubox5.S	chpf.L		LOC108713036	krt23.L	znf608.S		mast3	dgkq.S	mast2
dhh.S	arl5a.S	cfap77		dhh.S	klf5.L	ndufa8.S		snx31.L	cep70.L	gng4.S
gap43.L	mal2.L	LOC108709519		gap43.L	znf532.L	pim1.L		ccdc34.S	angel1.L	ubac1.L
itga2.L	acot11	rcan3.L		itga2.L	kiaa1217.S	LOC108717899		MGC97820.L	atp6v0a1.S	setd7.L
Xelaev18039313m	plekhm2.S	rab34.L		Xelaev18039313m	LOC108717439	slc2a2.L		ptp4a3.S	zic2.S	slc30a2.S
fzd4.L	josd2.L	p4hb.L		fzd4.L	LOC108715762	Xelaev18012280m		trmt12.L	pkmyt1.S	plpp1.L
rasgef1b.S	sulf2.S	tmem45a.L		rasgef1b.S	slc4a1.S	rpl26.L		zmym2.S	eps8.S	atl2.L
bhlhe41	mtss1.1.S	litaf.S		bhlhe41	gne.S	itpka		picalm.L	ubox5.S	klc1.L
tet2.L	gpr155.S	lrp5.L		tet2.L	aldh1l1.L	arpc3.L		dusp11.L	arl5a.S	pde7a.S
LOC108701268	abr.L	znf608.S		LOC108701268	arhgap6	net1.S		slc39a7.L	mal2.L	tyro3.L
sncg.S	LOC108695561	ndufa8.S		sncg.S	specc1l	Xelaev18012451m		ncln.S	acot11	dctn4.L
frmd3.S	commd2.S	gyltl1b.L		frmd3.S	rnf43.L	smug1.L		heatr5b.L	plekhm2.S	exoc6.L
vgll4l.L	kcnh6	pim1.L		vgll4l.L	ano9.L	kmt2e.L		nkap.L	josd2.L	mxi1.S
ripk2.S	impad1.S	LOC108717899		ripk2.S	rsph1.L	smc2.S		Xelaev18009838m	sulf2.S	gpi.L
fgfr3.L	tmem164.L	slc2a2.L		fgfr3.L	LOC108701743	znf740.L		wdr89.L	mtss1.1.S	LOC100158299
foxf1.L	LOC108719494	Xelaev18012280m		foxf1.L	fzd6.L	lcmt2.L		caap1.L	gpr155.S	ncan
nrcam.L	znf395.S	rpl26.L		nrcam.L	nr6a1.S	zbtb39.L		samd4b.S	abr.L	r3hdm1.S
gjb2.L	tpcn2.L	itpka		gjb2.L	atp8b3.L	kiaa0232.L		tsc22d1.L	LOC108695561	ddb2.L
LOC108715837	asb3.S	arpc3.L		LOC108715837	gramd2b	prom1.L		dapk3.L	commd2.S	prkag1.S
a2m	ddhd1.S	net1.S		a2m	efnb3	hnrnpr.L		elavl2.L	kcnh6	rhob.L
LOC108707266	loc100158410.L	Xelaev18012451m		LOC108707266	LOC108701721	ankrd11.L		mllt1.S	impad1.S	homer3.S
sp9.L	cdc6.L	smug1.L		sp9.L	ubp1.L	cdca2-like.L		ccpg1.L	tmem164.L	batf3.S
Xelaev18012289m	slc9b2.S	kmt2e.L		Xelaev18012289m	loc548390.S	rpl37.S		lrch3.S	LOC108719494	LOC100191024
fbxo32	not.S	smc2.S		fbxo32	tnni1.2.L	cbx1.S		pkp4.S	znf395.S	pdcd10.L
cfap54	zic2.L	znf740.L		cfap54	mars2	LOC108708140		sap130.L	tpcn2.L	baiap2.S
LOC108701132	sh3pxd2b.S	nos1ap.L		LOC108701132	slc9a3r2.L	lsm4.L		traf7.S	asb3.S	LOC100127794.L
siglec1.L	sptbn5.L	lcmt2.L		siglec1.L	ddx54	rnf38.S		ykt6.L	ddhd1.S	LOC108709626
pnpla2	prrc2a.L	zbtb39.L		pnpla2	mboat1.L	krt5.7.L		dmtf1.S	loc100158410.L	kctd6.L
LOC108714578	reep6.L	tgif2.S		LOC108714578	fam83c.L	rhebl1.L		tmem185a.L	cdc6.L	chmp1a
LOC108717136	mtrf1l.L	kiaa0232.L		LOC108717136	ptk2b.S	rictor		enpp6.L	slc9b2.S	ivns1abp.L
Xelaev18044434m	LOC100158389	prom1.L		Xelaev18044434m	ankrd12.S	kmt5b.S		znf395.L	not.S	mex3b.L
fzd2	secisbp2l.S	hnrnpr.L		fzd2	ncam1.S	tuba3c.S		nusap1.S	zic2.L	rnf14.5.S
slco4a1.L	Xelaev18014048m	ankrd11.L		slco4a1.L	rarres1.L	tjp2		mllt1.L	sh3pxd2b.S	inpp4a.S
LOC108715827	sh2b1.S	cdca2-like.L		LOC108715827	kit.L	cdc42bpa.L		mrpl54.S	sptbn5.L	ywhag.L
pfn4.S	spast.L	rpl37.S		pfn4.S	gdpgp1.S	ndufa8.L		slc35a4.S	prrc2a.L	slc30a9.S
tsc22d3.S	mpp7	kirrel2.L		tsc22d3.S	Xelaev18000483m	lsm4.S		samd4a.L	reep6.L	zc3h3
nkx2-5.S	fam110c.S	cbx1.S		nkx2-5.S	slc9a3r2.S	cdc34.S		golgb1	mtrf1l.L	flcn.S
LOC108701392	dnajb14.L	LOC108708140		LOC108701392	bmp7.1.L	rpl34.S		ube2r2.L	LOC100158389	tamm41.S
LOC108712047	LOC108701852	lsm4.L		LOC108712047	fcn2	gigyf2.L		gramd1c.S	secisbp2l.S	asap2.S
cdx4.S	tsen34.L	rnf38.S		cdx4.S	elf1.S	ube2n.L		slc39a9.L	Xelaev18014048m	rbm27.S
snai2.S	lipg.L	krt5.7.L		snai2.S	Xelaev18039754m	prc1.2.S		zfyve16.S	sh2b1.S	polg.L
fmnl2	ptpra.L	ptpn13.L		fmnl2	sgsm3.S	cenpe.L		pja2.L	spast.L	srebf2.L
plekhg4b	prkcz.L	rhebl1.L		plekhg4b	adgrf5	prpf39		gapvd1.S	mpp7	tnip2.S
lfng.S	mark2.S	rictor		lfng.S	MGC81163	zfc3h1		vars2.L	fam110c.S	arl6.L
ctnna2	pgk1.L	kmt5b.S		ctnna2	cdc14a.L	cdca3.L		wdr44.S	dnajb14.L	stk35.S
wnt4.S	pex12.L	tuba3c.S		wnt4.S	MGC98819	rhoa.2.S		rnf126.L	LOC108701852	dennd4b.L
ror1.S	stk11.L	tjp2		ror1.S	slc35c1.L	aurka.L		slc35e1.L	tsen34.L	rnf130.S
rgs14.L	cul9.L	cdc42bpa.L		rgs14.L	onecut1.2.S	msi1.S		acsl4.L	lipg.L	ralgapa1.S
p2ry1.L	dhx30.S	ndufa8.L		p2ry1.L	nek5.L	smc2.L		nsun7.S	ptpra.L	slc39a1l.L
Xelaev18028752m	marchf5.S	lsm4.S		Xelaev18028752m	LOC108711335	ywhae.L		gdf9.S	prkcz.L	clasp1.S
epha7.L	mef2d.S	cdc34.S		epha7.L	mov10	golm1.S		birc5.2.S	mark2.S	dcaf6.L
barhl2.S	bmp2.S	rpl34.S		barhl2.S	nbeal2.L	rai14.L		rhbdd2.L	pgk1.L	klhl24.S
tmprss2.2.L	zmynd19.L	gigyf2.L		tmprss2.2.L	myo5b.L	rpl35a.L		polr1d.2.L	pex12.L	dapl1.S
cebpd.L	mipol1.L	ube2n.L		cebpd.L	dnajb9.S	arglu1.S		cxcr4.L	stk11.L	pxylp1.S
LOC108719038	LOC108695585	prc1.2.S		LOC108719038	MGC83169	rbfox2.S		adam10	cul9.L	Xelaev18002673m
Xelaev18029531m	slc23a2	cenpe.L		Xelaev18029531m	LOC100492708	rps2.L		mat2b.L	dhx30.S	hnrnpll.L
Xelaev18012293m	h1foo.S	prpf39		Xelaev18012293m	slc30a7.S	anln-like.1.L		camsap3.L	marchf5.S	xl64phr
dhrs3.L	herc3.L	zfc3h1		dhrs3.L	LOC108699767	zzz3.S		LOC108718301	mef2d.S	rasef.S
pm20d1.L	hhla2.S	cdca3.L		pm20d1.L	sp7.L	MGC81028		arhgdia.L	bmp2.S	letm2.S
rasgef1a.L	lpin1.L	dnmbp.L		rasgef1a.L	Xelaev18017809m	lig3.L		cdc16.L	kirrel2.L	wee2.L
btbd6.L	arid5b.L	rhoa.2.S		btbd6.L	LOC108718861	rps3a.L		arf6.S	zmynd19.L	peak1.L
LOC108701275	mast2.S	aurka.L		LOC108701275	zbtb46.S	rpl27a.L		fancb.L	mipol1.L	ttc5.L
pkdcc.2.S	ctnnd2	msi1.S		pkdcc.2.S	esrp1.S	rps5.S		taf9b.L	LOC108695585	gs17.S
LOC108702970	mal2.S	smc2.L		LOC108702970	spdef.S	polr2h.L		kmt2d.S	slc23a2	anks1a.S
or6f1	lix1l.S	ywhae.L		or6f1	fam3b.L	angpt4.S		atxn2.L	h1foo.S	pcyox1.L
adcy9.L	naa60	golm1.S		adcy9.L	kctd15.L	leng8.L		camkk2.S	herc3.L	sorl1.L
Xelaev18033620m	borcs7.S	rai14.L		Xelaev18033620m	krt5.7.S	rps12.L		scaf8.S	hhla2.S	cask.L
fgfr2.S	fbxo42.L	rpl35a.L		fgfr2.S	fer1l4	yif1b.L		vps13a.L	ptpn13.L	csnk1g3.L
chsy3	tysnd1.L	arglu1.S		chsy3	nek2.L	cdca5.L		cul2.L	lpin1.L	pdcd6.L
hgs.S	tbc1d9	rbfox2.S		hgs.S	sytl4.S	topbp1.L		usp16.L	arid5b.L	gpr137c.L
ncmap.L	adcy4.L	rps2.L		ncmap.L	atf7ip.S	rps4		kpna1.L	mast2.S	LOC108707139
Xelaev18004205m	Xelaev18001309m	anln-like.1.L		Xelaev18004205m	slc19a2.L	brd1.S		suco.L	ctnnd2	ccdc107
igf2.S	slc35c1.S	zzz3.S		igf2.S	hic2.L	znf740.S		cdc45.L	mal2.S	brca2.L
Xelaev18007821m	pex11g.S	MGC81028		Xelaev18007821m	figf.L	cidea.L		cisd1.L	lix1l.S	tpgs2.L
lmo3.L	golga1.S	lig3.L		lmo3.L	MGC68858	uqcr10		ipo9.L	naa60	mettl16.L
plvap.L	trib2.S	rps3a.L		plvap.L	gas1.L	clasrp.L		flna	borcs7.S	abhd17a.L
cdh15.S	ap1s3.S	rpl27a.L		cdh15.S	sephs1.S	anln.L		slc1a5.L	fbxo42.L	gpd2.L
cyp26c1.S	sos2.S	rps5.S		cyp26c1.S	kitlg.L	hmgn2.L		dapk3.S	tysnd1.L	gpr22l.S
ufl1	tmem39b.L	polr2h.L		ufl1	hexd	rps16.L		fam222b.L	tbc1d9	calhm2.L
ccn2	tada3.S	angpt4.S		ccn2	LOC108704556	rps9.L		znf407.L	adcy4.L	slc12a6.S
gli2.L	lrrc58.L	leng8.L		gli2.L	slc22a4.L	hmgb2.S		kif16b	Xelaev18001309m	ska2.L
st6gal2.L	ybx2.L	rps12.L		st6gal2.L	mfhas1	cirbp.L		cnep1r1.L	slc35c1.S	pawr.L
LOC108711622	asphd2.S	yif1b.L		LOC108711622	pvrl4.S	scamp5.L		tax1bp1.L	pdk4.S	letmd1.L
vwc2l.2.L	rab31.L	cdca5.L		vwc2l.2.L	trim29.S	ythdf2.L		fbxo34.S	pex11g.S	zyg11b.S
c4orf45.L	ptprg.L	topbp1.L		c4orf45.L	uqcrq.S	ywhae.S		kif22.L	golga1.S	mfsd14b
mboat2	pla2g4f.L	rps4		mboat2	blvrb.L	rpl26.S		ddx56.S	trib2.S	kiaa0100.L
reck	brap.L	brd1.S		reck	loc100497729.L	myef2.L		txn2.S	ap1s3.S	ppp1r9al.L
cebpa.S	spire2.L	znf740.S		cebpa.S	znf414.L	rps20.S		cysrt1	sos2.S	med18.S
irx3.S	qrsl1.L	cidea.L		irx3.S	prdx4.L	rps6.L		luzp1.S	tmem39b.L	tmem57.L
rbbp8.S	pid1.L	uqcr10		rbbp8.S	tstd1.S	rbm34.L		cab39l.L	tada3.S	hist1h2aa.L
LOC108711087	cuedc1.S	clasrp.L		LOC108711087	dlx3.L	kiaa0355.L		nup35.S	lrrc58.L	armc2.L
saxo1	syne2	anln.L		saxo1	b3gnt7.L	zfand4.L		spry1.S	ybx2.L	plxnb2.L
epha3	ctdnep1.S	hmgn2.L		epha3	Xelaev18045499m	prelid1.S		abl2.L	asphd2.S	cited2.L
prpsap1.L	1500009l16rik	rps16.L		prpsap1.L	rasgrp1.L	lrig2.L		chfr.L	rab31.L	capn15.L
foxa2.L	LOC108711538	rps9.L		foxa2.L	1700007k13rik	gpcpd1.L		rad17.L	ptprg.L	tmbim1.S
mmp14.L	LOC108718445	hmgb2.S		mmp14.L	ndc1.L	hmg-17		dnajb1.L	pla2g4f.L	tpcn1.L
emilin1.L	abhd12.L	cirbp.L		emilin1.L	ptger4.L	ptma.L		arl2bp.L	brap.L	scarb2.S
crtap.L	usp43.L	scamp5.L		crtap.L	LOC108711752	elof1.L		ccz1b.L	spire2.L	LOC108706563
slc26a5.L	madd.S	ythdf2.L		slc26a5.L	tiam1.S	MGC52578		dnaaf1.S	qrsl1.L	myo1e.1.L
ntrk2.S	polrmt.L	ywhae.S		ntrk2.S	dedd2.S	rpl9.L		sytl4.S	pid1.L	dgcr6.S
cdh2.L	azi2	rpl26.S		cdh2.L	fam83c.S	cirbp.S		trim33.S	trappc10.L	etv6.S
Xelaev18010427m	arhgap32.S	myef2.L		Xelaev18010427m	tbc1d31.L	hmgn1.L		irf5.L	cuedc1.S	topors.S
cebpd.S	ccdc126.S	rps20.S		cebpd.S	LOC108699553	rpl31.L		myo1c.S	syne2	cdk5r2.L
papss2.S	ttc9.L	rps6.L		papss2.S	selk.S	rps6.S		slc30a2.L	ctdnep1.S	gls.L
ptprb.L	plekha5	rbm34.L		ptprb.L	muc17	rps7		golga4.L	1500009l16rik	ccdc85c.S
skida1.L	nr1i2.S	kiaa0355.L		skida1.L	zbtb46.L	loc728026.L		gatad1.L	LOC108711538	siva1.L
fgf12.S	rnf32	zfand4.L		fgf12.S	c18orf21.L	arhgap5.L		rnf121.L	LOC108718445	ccdc50.S
LOC108705534	enox1.S	prelid1.S		LOC108705534	zbtb11.L	fau.L		ppip5k2.L	abhd12.L	tnfsf11.L
dnah11	sbf2.L	lrig2.L		dnah11	MGC85058	hnrnpa2b1.S		tmem45b.S	usp43.L	mef2d.L
tf.S	MGC85210	gpcpd1.L		tf.S	slain2.L	rpl30.L		marveld2.S	madd.S	tmem255a.S
acsbg2.S	zfyve28-like.1.S	hmg-17		acsbg2.S	elovl3.L	wdr83os.L		dnajc16.S	polrmt.L	naa60.L
col5a1.S	ccny.L	ptma.L		col5a1.S	clic3.L	ankrd11.S		ccdc61.L	azi2	trim25
pde4c	loxhd1.L	elof1.L		pde4c	cib1.S	rps10.L		golph3l.L	arhgap32.S	cuedc1.L
adssl1.S	myo6.S	MGC52578		adssl1.S	hspa13.L	rbm45.S		csnk1e.L	ccdc126.S	nkd1.S
evx1.S	tmem55a.L	rpl9.L		evx1.S	esrp1.L	top2b.L		gclc.L	ttc9.L	slmap.L
slc25a24.L	trpv2.L	cirbp.S		slc25a24.L	wap	rps3a.S		cep68.L	plekha5	sik2.S
helt.L	arhgef18.S	hmgn1.L		helt.L	LOC108715896	rpl10a.S		qrich1.2.S	nr1i2.S	wasll.L
gal3st1.L	ptges.S	rpl31.L		gal3st1.L	gmps.L	nsep1		stim2	rnf32	tspan1.S
mnx1	meikin	rps6.S		mnx1	krt8.2.S	ube2n.S		gltp.S	enox1.S	st3gal1.S
scarf2.L	spsb3.L	rps7		scarf2.L	ift46.L	leprotl1.L		b3gnt5.L	sbf2.L	naa16-like.L
Xelaev18028750m	mmaa.L	loc728026.L		Xelaev18028750m	tprg1l	sem1		hic2.S	MGC85210	kiaa0513.L
dkk1.L	dsel.L	arhgap5.L		dkk1.L	mbd6.S	rpl6.L		eed.L	zfyve28-like.1.S	ctage5.L
LOC108719358	tspoap1.L	fau.L		LOC108719358	tusc2.S	ago4.L		tmed9.S	ccny.L	tradd.L
Xelaev18041292m	LOC108719399	hnrnpa2b1.S		Xelaev18041292m	tceb3.L	melk.L		larp4.S	loxhd1.L	gpkow.L
cnga2	vps9d1.L	rpl30.L		cnga2	pprc1.L	rpl17.L		exoc2.L	myo6.S	mapkapk2.S
plscr3	ppp1r3c.2.S	wdr83os.L		plscr3	gnb3.L	rpl23.S		cpsf4.S	tmem55a.L	znf335.L
gpx3.L	tprn	ankrd11.S		gpx3.L	pdxdc1.L	rps27a.L		luzp1.L	trpv2.L	fitm2.L
hdac9.S	grb10.L	rps10.L		hdac9.S	upk3b.L	MGC83421		zhx3.S	arhgef18.S	rnf170.S
b3gat2	traf4.S	rbm45.S		b3gat2	LOC108711517	rpl15.L		btrc.L	ptges.S	gcnt3.S
spib.S	psen2.S	top2b.L		spib.S	vimp.S	rpl8.S		nol12.S	meikin	aak1.S
ccdc80.L	dtna.S	rps3a.S		ccdc80.L	enc1.L	eif4g1.L		xtm4	spsb3.L	tbc1d22b.S
dnah6	nxpe3.S	rpl10a.S		dnah6	igf1r.L	no38		yod1.L	mmaa.L	usp32.S
meox2.L	limd2.S	nsep1		meox2.L	fam3c.S	wdr12.L		dennd4a.L	dsel.L	eif4enif1.S
palm2.L	ubr4.S	ube2n.S		palm2.L	atp6ap1.1.S	mapre1.S		ptcd2.L	tspoap1.L	Xelaev18045296m
gngt2.1.L	znf41.S	leprotl1.L		gngt2.1.L	znf593.L	slu7.L		kiaa0196.S	LOC108719399	gemin2.S
nceh1.S	cbl.S	sem1		nceh1.S	tm9sf2.L	yipf6.L		n4bp1.S	vps9d1.L	dapk1.L
ddit3.L	plekhm3.L	rpl6.L		ddit3.L	klhl36.L	arl1.L		limch1.L	MGC115585	usp38.S
prdm12	zfyve19.L	ago4.L		prdm12	slc35c2.S	ybx1.S		rps6kc1.L	ppp1r3c.2.S	slc8a3.L
ppp1r3e	LOC108706275	melk.L		ppp1r3e	shfm1.S	rpl7.L		bloc1s6.S	tprn	fam46c.L
tgfa.L	def8.S	rpl17.L		tgfa.L	zfand4.S	stim1.S		hnrnpll.S	grb10.L	dnajc13.S
mnx1.S	kctd3.L	rpl23.S		mnx1.S	deaf1.L	hnrnph3.L		tmem115.S	traf4.S	atl2-like.S
trabd2b.S	dapk1.S	rps27a.L		trabd2b.S	ywhah.S	rps19.S		cul4b.S	psen2.S	MGC115657
fmnl2-like.S	kank1.L	MGC83421		fmnl2-like.S	galnt6	cdc34.L		chd8.S	dtna.S	kifap3.S
ppfia3.L	dusp7.L	eif4g3		ppfia3.L	LOC108713175	uqcr11		efr3a.L	nxpe3.S	tango6
eya2.S	ets1.S	rpl15.L		eya2.S	rps21	nek2.S		fkbp4.L	limd2.S	csnk1e.S
hpgd.S	pex14.S	rpl8.S		hpgd.S	afmid.L	tpt1.L		znf577.L	ubr4.S	rnf19b.S
six1.S	atoh1.S	eif4g1.L		six1.S	tab2.S	snrpf.L		trmt13.L	znf41.S	taf4b.S
march8.S	plekhf2.S	no38		march8.S	tnip2.L	hdlbp.L		nploc4.L	cbl.S	chn1.S
cemip.L	dsc3.S	wdr12.L		cemip.L	trpm5.L	hnrnpdl.L		emsy.S	plekhm3.L	loc100493164.L
gprc5b.S	dpf3.L	mapre1.S		gprc5b.S	nckap5l.S	arf1.S		idh3a.S	zfyve19.L	rad51d.L
sox5.L	mfsd8.L	slu7.L		sox5.L	tmem45b.L			ctnnbip1.L	LOC108706275	LOC108705473
runx1t1.L	ubtd2.S	yipf6.L		runx1t1.L	mapk6.S			tbc1d12.S	def8.S	MGC81124
Xelaev18032100m	pdzd2.S	arl1.L		Xelaev18032100m	c1galt1c1.L			ppp4r3b.L	kctd3.L	smn2.S
mamld1.S	aldh2.L	ybx1.S		mamld1.S	fhit.L			id2.S	dapk1.S	Xelaev18030357m
rnf112	ccdc88a	rpl7.L		rnf112	gpatch4.S			lrrc42.L	kank1.L	pomk.L
MGC80611	Xelaev18004836m	stim1.S		MGC80611	map2k6.L			ifi30.S	dusp7.L	itpkc.L
nav3.S	kctd18.S	hnrnph3.L		nav3.S	tfcp2l1.S			snap91.S	ets1.S	cep120.L
hsh2d.S	znrf2.S	rps19.S		hsh2d.S	ccser2.L			got2.L	pex14.S	atg4c.L
mmp28.L	grin2b.S	cdc34.L		mmp28.L	tuba1a.S			prkar2a.L	atoh1.S	dip2a.S
ca7.L	rgmb.S	uqcr11		ca7.L	LOC108710853			hmgxb3.L	plekhf2.S	crtc3.S
LOC100487499.S	ccdc102a.L	nek2.S		LOC100487499.S	elmod2.L			oaf.S	dsc3.S	kiaa0922.S
arnt2.S	atf2	tpt1.L		arnt2.S	map3k10.L			cc2d2a.L	dpf3.L	tdgf1.1.L
fsbp	rif1.S	snrpf.L		fsbp	evpl.L			h6pd.S	mfsd8.L	ccdc88a.S
mmel1.S	kirrel2.S	hdlbp.L		mmel1.S	tm9sf3.S			sdf2l1.L	ubtd2.S	ccdc62.L
tac1.L	LOC108703132	map4k4-like.L		tac1.L	ccdc71.S			rexo1.L	pdzd2.S	pias3.S
irx2.L	LOC108719459	hnrnpdl.L		ppm1h.L	twsg1.S			pld2.L	aldh2.L	dapl1.L
slc4a1.L	fam189a1.S	arf1.S		irx2.L	tiparp.S			ints2.S	ccdc88a	nckipsd.S
xlmo1	rhbdl1.L	tuba4.S		slc4a1.L	aacs.L			lnx2	Xelaev18004836m	tube1.L
Xelaev18012801m	drd4.L	tmed7.L		xlmo1	MGC52622			glmn.L	kctd18.S	ccdc158
Xetrov90016939m.S	pdzd8.L	orc6.L		Xelaev18012801m	dlx6.S			ccdc68.S	znrf2.S	keap1.L
abtb2.S	socs5.S	dus1l.L		Xetrov90016939m.S	endod1.L			bsg.S	grin2b.S	slc34a2.L
gypc.L	fbxo31.S	mdm1.L		abtb2.S	gng7.L			pxn.S	rgmb.S	depdc4.L
phactr1.S	arhgap26.L	hbox10.S		gypc.L	hivep1.L			rhog-like.1.S	ccdc102a.L	chst13.S
vwf	arhgap33.S	ipo8		phactr1.S	Xelaev18043700m			keap1.S	atf2	usp15.S
sp8.L	arhgap40.S	mkrn3.L		MGC115585	chsy1.S			LOC108700229	rif1.S	fbxl4.S
gprc5b.L	pag1.S	ppp1r13b.L		vwf	esyt3.S			pikfyve.L	kirrel2.S	mast4.S
kng1.L	pou5f3.2.S	trpm7.L		sp8.L	arf6.L			abi1.L	LOC108703132	pex1.L
ugp2.S	cry4.L	manf.L		gprc5b.L	LOC108699910			poldip2.S	LOC108719459	smarca5.S
xfrp	cdkl5.L	LOC108699095		kng1.L	ssr2.L			clec16a.S	fam189a1.S	hgsnat.L
abhd14a.S	fam96a.L	hmces.L		ugp2.S	LOC108713117			rap1a.L	rhbdl1.L	pou2f1.S
frem1	LOC108709286	itsn2.L		xfrp	scnn1a.L			st3gal3.S	drd4.L	ywhag.S
hes7.1.L	zbtb16.S	rnpepl1.L		abhd14a.S	LOC108719789			ubap1.S	pdzd8.L	arhgef12.L
pik3ip1.L	tbx22.S	lman1.L		frem1	gmppb.L			cdkn2aip.L	socs5.S	mfsd12.L
ggact.L	adamts6.S	syap1.L		hes7.1.L	zfp91.L			rnf126.S	fbxo31.S	LOC108707237
vav3.S	ccdc50	tyw3.L		pik3ip1.L	fam212a.S			bix2.L	arhgap26.L	cyp1a1.S
Xelaev18022168m	sh2d3c.L	raf1.L		ggact.L	c14orf79.L			grk5.S	arhgap33.S	filip1.S
frzb-1	adamtsl5.L	tmf1.L		vav3.S	mfsd6.L			ubxn2a.L	arhgap40.S	gbf1.L
lhfpl2.L	pdzrn3.L	bag4.S		Xelaev18022168m	ncor2			naa30.L	pag1.S	pign.S
nfkb1.L	fam102b.L	rwdd1.L		frzb-1	dusp8.S			rasal2.S	pou5f3.2.S	pou5f3.3.S
cdh11.L	LOC108707871	gtf2ird1.S		lhfpl2.L	bmp4.L			bri3bp.S	cry4.L	tcaim.L
acsf2.S	shank2.L	lrrfip2.L		nfkb1.L	osbpl2.S			atg16l1.L	cdkl5.L	slc20a1.S
Xelaev18002540m	LOC108697848	ubac1.S		cdh11.L	bmp4.S			oxct1.L	fam96a.L	nfkbie.L
LOC108714374	nfatc2.S	csnk1g2.L		acsf2.S	eppk1.L			wapl.S	eif4g3	LOC100036828
acap3.L	loc100216027.L	tceanc2.S		Xelaev18002540m	rpl27a.S			sh3glb1.S	rcan3.L	spdl1.L
krt9.1.L	LOC100485199-like.S	map2k7.S		LOC108714374	LOC108710484			plekhf2.L	LOC108709286	bcar3.L
lama2	nup98.L	slc35b3		acap3.L	atg12.S			c11orf95.L	zbtb16.S	nfxl1.L
adora2b	LOC108711723	ccnb1.2.L		krt9.1.L	tmem8a.S			slc25a40.L	tbx22.S	herc1.L
lypd6.L	tcta.S	bloc1s6		lama2	LOC108705484			tmem178b	adamts6.S	lipe.L
fmo5	hpca.L	mmadhc.L		adora2b	rgs19.L			ipo13.L	ccdc50	arhgap33.L
Xelaev18028825m	ptpn23.L	LOC100301958		lypd6.L	srp19.S			lmbr1l.L	sh2d3c.L	atp13a4.S
clcn2.L	wee2.S	dcaf5.S		fmo5	rps21.S			rhbdd3.L	adamtsl5.L	fam107b.S
acap3.S	Xelaev18046538m	whamm.L		Xelaev18028825m	trpm4			otx2.L	pdzrn3.L	wdfy3
c5.2.L	Xelaev18023726m	ctsd.S		clcn2.L	stard10.L			LOC108695562	fam102b.L	prrg1.L
Xelaev18031338m	aco2.S	shf.S		acap3.S	dot1l.L			bmi1.L	LOC108707871	camkk1.S
LOC108696906	runx1.L	megf11		c5.2.L	LOC108701168			otx2.S	shank2.L	c6orf120.L
gjb2.S	pcdh8.L	arih2.S		Xelaev18031338m	LOC108697654			tm9sf1.S	LOC108697848	MGC76328.S
blvra.L	LOC108696547	gng10.L		LOC108696906	rpl29.S			usp22 a	nfatc2.S	dop1a
LOC108716849	bri3.S	wdr89.L		gjb2.S	znf282			git2	loc100216027.L	dnajc14.L
cdk5rap3.L	pde4d-like.L	abhd16a.L		blvra.L	slc7a4.L			ddx1.L	LOC100485199-like.S	kif21a.L
Xelaev18008189m	prkch.L	golim4.S		LOC108716849	phldb1			tmem62.S	nup98.L	dap.L
LOC108706875	foxh1.S	taf5l.S		cdk5rap3.L	hid1.S			foxn2.S	ets1.L	tapt1.S
tfap4.L	hs3st1	cttnbp2.L		Xelaev18008189m	b3gnt2.S			ranbp3.S	LOC108711723	fmn2.L
LOC108714006	pcgf2.L	haus6.S		LOC108706875	LOC108709654			c11orf57.S	tcta.S	capn15.S
serpinb10.S	tnrc6c.L	pja2.S		tfap4.L	ccser2.S			ppfia1.L	hpca.L	uba3.S
kcnk13.L	spsb3.S	arfip1.S		LOC108714006	nectin4			yae1d1.L	gli1.S	LOC108714398
znf501	tmem158.S	kiaa0226l.L		serpinb10.S	tmem208.L			kpnb1.L	ptpn23.L	rev1.S
gpx3.S	mpv17l2.L	dcaf10.S		kcnk13.L	gprc5cl1.L			pus3.L	wee2.S	borcs6.S
1700030j22rik	LOC108719562	tada3.L		znf501	rpl8.L			wdr61.S	Xelaev18046538m	klhl7.S
tcp11l1.L	LOC108697295	gramd1c.L		gpx3.S	gosr2.L			stk24.S	Xelaev18023726m	magi1.L
Xelaev18041958m	wnt7a	plxna1.S		1700030j22rik	atf7ip.L			LOC108711140	aco2.S	dhx35.S
tmem178.2.L	rnf152.L	ecsit.S		tcp11l1.L	Xelaev18016017m			nbeal1.L	runx1.L	kiaa0226l.S
matn4.S	cbarp.L	lamp1.S		Xelaev18041958m	fundc1.L			thap1	pcdh8.L	picalm.1.L
Xelaev18001114m	LOC108704294	nedd4l.S		tmem178.2.L	nr2f6			slitrk5.S	LOC108696547	b3gnt4.L
LOC108695296	gpr37l1	grip1		matn4.S	tram1.L			rcl1.S	bri3.S	prdm9.L
Xelaev18027412m	marchf2	pigh.L		Xelaev18001114m	xab2.L			mrps17.L	pde4d-like.L	inpp4a.L
nudt12.S	hlf.S	tmem131.L		LOC108695296	rbms2.L			rabgef1.S	prkch.L	lin54.S
npr1.S	Xelaev18011648m	ccdc18.S		Xelaev18027412m	cope.S			ppm1d	foxh1.S	prss16.L
LOC108706759	akip1	slmap.S		nudt12.S	irak1bp1.S			pnrc2.L	hs3st1	hectd4.L
gata3.S	ipp.L	smarcal1.L		npr1.S	sulf1.L			gpt2.S	pcgf2.L	rfwd2.S
dkk1.S	LOC100489074.L	fam110c.L		LOC108706759	usp49.S			smarcad1.S	tnrc6c.L	usp38.L
cer1	nrap.L	fam210a.L		gata3.S	clk3.S			celsr2.L	spsb3.S	atp8a1.S
alcam.S	LOC108697873	snx9.S		dkk1.S	gnai3.S			larp4.L	tmem158.S	kbtbd3.S
rax.S	tph1.S	huwe1		cer1	chsy1.L			asap2.L	mpv17l2.L	arhgap11a.2.S
gad1.1.L	rragd	cysrt1		alcam.S	atp11c.L			gcc1.L	LOC108719562	rnf41.L
Xelaev18033867m	loc733728.L	umad1.L		rax.S	rbm38.S			Xelaev18046477m	LOC108697295	cracr2b.S
gnrh2.L	eomes.L	pigs.L		gad1.1.L	eps8l2.S			dolpp1	ppm1h.L	fam46b.S
LOC108701848	wdsub1.L	extl3.S		Xelaev18033867m	znf581.S			cul2.S	wnt7a	h1foo.L
timp3.L	LOC108702643	clasp1.L		gnrh2.L	clcn5.L			ate1.L	rnf152.L	trim7.S
wnk2	btn3a2	sytl4.S		LOC108701848	derl1			fam122b.L	cbarp.L	trappc8.L
Xelaev18010400m	myo15a	strn		timp3.L	arglu1.L			kif1bp.S	LOC108704294	zfp36l2.2.L
ca7.S	angptl4.L	cep83.L		wnk2	LOC108718942			epb41l4a.S	gpr37l1	mgat4b.L
pappa	tmem116.L	lrp1.L		Xelaev18010400m	uspl1-like.L			LOC108695556	marchf2	znf33a.L
mttp	eomes.S	tmem184c.L		ca7.S	tanc2			nelfa.L	hlf.S	tbc1d8
snn.S	LOC108718863	slc9a3r1.L		pappa	mlec.L			nipal4.S	Xelaev18011648m	ptges2.L
cebpa.L	pde1c	dbf4b.L		mttp	hsf2.L			p2rx4.L	akip1	abcb6.L
slc26a9.L	dsg4.L	mmp15.S		snn.S	tubb			fam43a.S	ipp.L	styx.S
Xelaev18033386m	ugt3a2.L	ptpra.S		cebpa.L	rnf114.S			lysmd2.L	LOC100489074.L	dock9
plekhg1.S	hes8.L	daam1.S		slc26a9.L	mansc1			stam.L	nrap.L	rab21.L
rab9b.L	LOC100145533.L	slc10a7.L		Xelaev18033386m	sec61a1.S			arl9.L	LOC108697873	slc35g1.L
Xelaev18039536m	cmahp.L	loc100126636.S		plekhg1.S	arnt.S			efna5.S	tph1.S	tmcc2.S
sgk1.S	slc35a3.1.L	neurl4.S		rab9b.L	mrpl27.L			btbd8.L	rragd	snx7.L
ventx1.2.S	LOC108719743	lrp1.S		Xelaev18039536m	slc17a9.L			ehbp1.L	loc733728.L	wasll.S
h2afy2.L	ly6e	bod1l1.L		sgk1.S	timm17a.L			hace1.L	eomes.L	epha2.L
lrfn1.2.S	otog.L	znf585b.S		ventx1.2.S	psmb3.L			mtfr1l.L	wdsub1.L	Xelaev18031390m
spon1.S	glb1l2.S	arhgef18		h2afy2.L	pmm2.L			lpgat1.S	LOC108702643	camkk1
piezo2	LOC108719498	gpn2.S		lrfn1.2.S	mfsd2a.S			LOC108707216	btn3a2	slc15a4.S
sspo	loc100145533.S	svil.L		spon1.S	prelid1.L			sys1.S	myo15a	camsap1.L
meis1.S	Xelaev18029603m	dck.1.L		piezo2	gm20188			dpp9.L	angptl4.L	eif4e3.L
cer1.S	tp63.S	tmem115.L		sspo	lpcat4.S			necap2	tmem116.L	map1lc3c.L
hvcn1.L	slc16a9.S	grb10.S		meis1.S	ppil3.S			nf2.L	eomes.S	cep170.S
prdm6.S	ugt8.S	gtdc1.S		cer1.S	tnfsf10l.L			frmd4b.L	LOC108718863	pik3r2.L
LOC108706139	atp12a.L	srgap2.L		hvcn1.L	alg2.L			mcrip1.S	pde1c	c11orf96.S
fcn1	fcgbp	tbc1d23.L		prdm6.S	oraov1.S			ikbkg.L	dsg4.L	exd2.L
dcx.S	ppl.S	cep41.S		LOC108706139	leng8.S			ric1.L	ugt3a2.L	ccnb1.L
rundc3a	gck.L	ncald.L		fcn1	pcgf3			gpsm2.S		glce.L
kcnk6.S	mesp2.S	ppfibp2		dcx.S	znf628.S			tom1l2.L		clint1.L
ccdc68.L	Xelaev18032572m	daam1.L		rundc3a	arf1.L			tmtc3.L		pik3ca.L
sema6a.S	mcidas	dock5.L		kcnk6.S	afap1l2.L			tp53bp2.L		usp25.L
Xelaev18011395m	hoxd1.L	dgkq.L		ccdc68.L	utp18.L			ccdc117		slc30a5.S
LOC108713993	syt1	mpp6.L		sema6a.S	poc1a.L			smim12.L		rnf8.L
LOC108718683	frem1.L	inpp5b.L		Xelaev18011395m	gosr1.L			drosha.S		trpv4.L
mcf2l.2.S	LOC100486385.L	r3hdm1.L		LOC108713993	ptger4.S			LOC108713105		rad51c.L
Xelaev18008252m	pnliprp1	nup54.L		LOC108718683	ptafr.L			tnrc18.S		lrrc16a.L
slc12a3	tbx6.S	coq10a.L		mcf2l.2.S	elmo1.L			arhgap21.L		inf2.L
plch1	LOC108705880	mrpl1.L		Xelaev18008252m	c5orf15.S			sos2.L		hectd4.S
LOC108701312	hes3.3.L	stambpl1.L		slc12a3	zfr.L			pus1.S		znf577.S
pnp.L	LOC100497061.L	bves.L		plch1	sirt1.S			ado.L		cgnl1.S
hao1.L	hoxa11.S	fbxo25.L		LOC108701312	utp15.L			timm23.L		filip1.L
nck2.L	lrat.L	top1.2.S		pnp.L	atp6v0a2.L			rpgr.S		atp9b.L
trabd2a	znf534.L	mtmr10.L		hao1.L	chrna2.S			sipa1l1.S		colgalt2
Xelaev18010055m	vgll1.L	zar2.L		nck2.L	zfp36.L			camk2n1		zswim4.L
Xelaev18003796m	slc45a3.S	glmp.L		trabd2a	timm17a.S			napg.L		tmem57.S
shisa2.S	galnt12.L	tmf1.S		Xelaev18010055m	vhl.S			smc6.L		nlk.L
twist1.S	hes9.1.S	pdpr.L		Xelaev18003796m	slc35a3.2.S			adam28.1.S		zyg11b.L
ralgds.L	vill.L	dennd5b.L		shisa2.S	ctps1.S			tspan3.S		LOC108709196
mn1.L	krt12.L	scap.L		twist1.S	ccdc173.L			cant1.L		LOC108719557
Xelaev18030798m	p2rx1.L	tasp1.S		ralgds.L	chkb.S			lrrk2.L		haus3.L
slc39a5.L	hes5.2.L	helz.L		mn1.L	tcim.L			hs2st1.S		bnipl.L
prdm5.L	fucolectin.S	atr.L		Xelaev18030798m	uba52			hsph1.S		dph3.L
ppp1r18	LOC398451	rnpepl1.S		slc39a5.L	cltc.L			gab2.S		dock4.L
mtcp1.L	cdx2.S	pdpr.S		prdm5.L	eif4e.L			alkbh5.S		pacs2.L
Xelaev18020076m	hoxa1.L	znf618.S		ppp1r18	kmt5b.L			timm8a.L		aktip.L
tbx20.L	LOC108718065	fam46b.L		mtcp1.L	ap1s3			tbc1d14		Xelaev18030392m
rspo3.L	atp13a-like.L	dcp1a		Xelaev18020076m	fam195a.L			c10orf35.L		pou5f3.3.L
ventx3.2.S	ppl.L	baiap2l1.S		tbx20.L	slc35a2.L			ccser2.L		LOC108708627
npr1.L	spns1	ubr2.S		rspo3.L	c12orf43.L			ccdc141.L		pigb.S
sox5	parm1	arl15.L		ventx3.2.S	ptrh2.L			spire2.S		appl2.L
LOC108715350	socs3.L	fam210a.S		npr1.L	rpl37.L			cct4.L		optn.S
LOC108703373	prox1.S	rab14.S		sox5	zfand5.S			gpm6b.L		c1orf116.L
st3gal2.1.S	dipk1c.S	hdac4.S		LOC108715350	acy3.L			tbc1d10a.S		lpar6.L
cpe.L	rab27a.S	lin9.L		LOC108703373	tmem183a.L			phc3.L		akap9
dgkk.L	loc100496187.L	mgat4a.L		st3gal2.1.S	LOC108713924			pgm2l1		poc5.L
hmha1.L	kif26a.S	zar1l.L		cpe.L	mpdu1.L			brpf3.S		LOC108695555
sesn1.S	hes9-1.L	ccser2.L		dgkk.L	ap1m2.L			irs4.S		immp1l.L
stx3	prr18.S	slc2a10.S		hmha1.L	cep170b.L			mark4.L		sertad2.S
gata5.S	hes5.5.L	csk.L		sesn1.S	LOC108717923			slc38a9		klhdc10
apobec2.L	hoxa9.L	MGC81661		stx3	herpud1.S			trak2.L		cdca7
dlx5.L	mcidas.L	alkbh8.S		gata5.S	kiaa1324l.S			zmym4.L		papd5.S
adamts7.L	tcaf1.L	gab2.L		apobec2.L	foxo4.L			galnt2.S		LOC108714146
clca3.L	LOC108711745	LOC108714350		dlx5.L	LOC108713255			Xelaev18041216m		cdc6.S
hmgcs1.L	socs1.L	cenpa.L		adamts7.L	tcf3.L			sgip1.L		gatsl3.L
tmem150b.L	f2rl2.L	spag9		clca3.L	cln3.L			bmp4.L		akap9.S
cltcl1.S	vtcn1.L	bmp4.L		hmgcs1.L	mfsd6l.L			Xelaev18035105m		mfsd14a
mb21d1.L	syt16.L	pde4dip		tmem150b.L	cyp4b1.2.L			tgs1.L		tdh.S
Xelaev18013302m	vsig8.L	snx13.S		cltcl1.S	arid3a.S			n4bp1.L		xpo6.S
met.L	slc30a10.S	tor1b.S		mb21d1.L	myl6.S			ythdc2.L		pigv-like.L
slfn13.L	sult6b1.5.L	lrrc58.S		Xelaev18013302m	knl1			slc9a7.S		dnajc13.L
kcnc1	fut6.S	sulf1.L		met.L	ndufc2.S			slc9a6.L		xpo6.L
rasa3.L	adgrf1.L	tp53i11.S		slfn13.L	LOC108702843			cpt2.S		LOC108701404
wwc1.L	syt13	sema3c.S		kcnc1	c10orf88.L			alg12.L		vcpip1.S
tlcd2.S	znf185.L	rcor2.L		rasa3.L	bcl2l12.S			pik3r4.S		fam20b.S
grin3b.L	hes5.1.S	pold2.L		wwc1.L	rpl36.S			gtpbp1.S		zswim4.S
zfhx4.L	xk81a1.S	birc6.S		tlcd2.S	rpl36.L			LOC108695538		LOC108695571
prrt3-like.S	aatk	loc734029.L		grin3b.L	ankhd1			src.S		sox18.S
zfp36l1.L	gng13.S	MGC98819		zfhx4.L	isg20l2.S			smarca5		grem1.L
ventx1.2.L	Xelaev18036730m	bora.S		prrt3-like.S	tctex1d2.L			slc4a11.L		btg-x
best2.S	syt8.L	fastkd5.L		zfp36l1.L	uqcr10.L			sulf1.L		foxi2.S
LOC108698716	nr6a1.L	fryl.S		ventx1.2.L	micos13			golga3.S		LOC108719533
loc108705532.L	krt12.S	ints14.S		best2.S	utp15.S			rnf5.L		arhgap18.L
mbd6.L	acpp	tuba4.L		LOC108698716	elovl7.L			gas2l3.L		loc733556.L
fbp1.L	sidt1.L	tor1b.L		loc108705532.L	slc22a5.L			rab14.L		slc20a2.L
nkx2-1	gdpd1.L	map3k10.L		mbd6.L	ifrd1.L			fez2.S		kcnj5.L
slc9a3.L	LOC108701787	plin3.L		fbp1.L	c11orf68.L			mier2.S		ccna1.L
ckmt1b.S	cdx1.L	wnk2.L		nkx2-1	ccnt1.L			timm13.L		nlk.S
cyp1a1.L	LOC108701744	znf182		slc9a3.L	chmp4b.S			stx16.S		fam109b.L
fam228b.S	adck1.L	abr.S		ckmt1b.S	manf.L			stambp.S		klhdc10.L
Xelaev18008078m	gcnt4	cebpg.L		cyp1a1.L	dnajb12.S			gid4.S		cracr2b.L
dbndd2	fam177b.L	thada		fam228b.S	dph2.L			dr1.L		ccnb1.S
bambi.L	eps8l1.L	csnk1g3.S		Xelaev18008078m	ptma.S			chd3		ubl7.L
ccng1.L	vill.S	ubl3.S		dbndd2	sec61a1.L			vps4a.L		ern2.S
arhgap9.L	dync1i1	sos1.L		bambi.L	pars2.L			tarbp1.L		kiaa0586.L
nccrp1.L	cdx4.L	mex3b.S		ccng1.L	upk1b			apba1.L		patl2.L
rdd4.L	ahnak	jak2.L		arhgap9.L	rpl17.S			twistnb.L		ap4e1.S
arl6ip1.L	ttc39a.L	fzd7.S		nccrp1.L	MGC64308			fcho2.L		dock9.L
dab2ip-like.L	gby.L	ankrd35.L		rdd4.L	tia1.S			hip1r.S		arl5c.L
hao2.L	phka2-like.S	enpp4.L		arl6ip1.L	hypk.S			foxa4.L		pou3f1.L
neurog2.S	greb1.L	pwwp2b.S		dab2ip-like.L	rpl37a.L			stk17a.L		emilin2.L
coa1.L	ag1.S	gpr137c.S		hao2.L	dnajb12.L			mpp6.S		rilp.S
slc27a3.L	ttc22.L	slc22a15.2.S		neurog2.S	slc44a2.S			inpp5a.1.L		arhgap26.S
msra.2.L	agr2.S	plxna1.L		coa1.L	actb.L			dpagt1.L		Xelaev18023494m
dennd2a.L	Xelaev18012620m	pacsin3.L		slc27a3.L	zmynd10.L			rabep2.L		neurl1b.L
slc13a3.L	col16a1	arntl.S		msra.2.L	m6pr.L			kank3.S		sbk1.L
loc100494211.L	LOC108719446	smtnl2.S		dennd2a.L	nop10			spty2d1.L		ccndx.S
igfbp2	rbbp8nl.S	uxs1.S		slc13a3.L	gnaq.L			cep295.S		vps13d.L
mespa.L	itln1.L	rasgrp1.L		loc100494211.L	wdr48.L			stx2.L		dand5.L
LOC108701270	irf5.S	pdzd8.S		igfbp2	zfc3h1.L			armc7.L		fry.L
znf703.L	gcm1.L	tvp23b.S		mespa.L	ankrd46.S			emc8.S		lpar6.S
cmtm5.S	itpr3	zcchc11.S		LOC108701270	sbno1.L			ccdc149.L		foxi2.L
mfsd7.L	kxd1.S	tulp4.L		znf703.L	hspa8.L			etnk1.S		foxh1.2.L
Xelaev18037819m	rbm20.L	ralb.L		cmtm5.S	sec61g.L			arg1.L		cldn5.L
ppp1r12b.L	LOC100037903.1	zc3h3.L		mfsd7.L	rps27a.S			Xetrov90004873m.L		ccno.S
atp8b2-like.L	slc2a12.L	fopnl.L		Xelaev18037819m	LOC108701166			nuak2.L		rgl2
mdk.S	trpm7	tbc1d12.L		ppp1r12b.L	znf654.S			st14.S		tgds.S
Xelaev18025987m	ociad2.S	rassf2.L		atp8b2-like.L	tmem63a.L			hpcal1.L		MGC68639
uts2r	tnni2.L	helz.S		mdk.S	unknown.S			e2f4.S		LOC108719547
dhrs3.S	dnah7.L	dck.1l.L		Xelaev18025987m	upf3b.S			MGC98819		dand5.S
map1lc3b.L	lrpprc.S	enc1.L		uts2r	srpra.L			vegt.L		Xelaev18011386m
fam83h.S	tnfrsf11a.S	xzar2		dhrs3.S	sgpp1.L			erbb2.L		cxorf21.S
wwc3.L	LOC108704529	pik3c2a.L		gli1.S	cks2.S			kiaa1328.L		fos.S
pik3r1.L	armc4.S	mast2		map1lc3b.L	h1fx.S			rassf3.L
col11a1.L	gnb3.S	gng4.S		fam83h.S	trappc13.S			slc35f5.L
Xelaev18010316m	ncam1.L	ubac1.L		wwc3.L	strap			timm50.L
fkbp9.S	ccdc63.S	setd7.L		pik3r1.L	tsc1.S			xpo5.S
tnfrsf19.L	aim1.S	slc30a2.S		col11a1.L	kat5.L			ssb.L
caprin2	Xelaev18000386m	plpp1.L		Xelaev18010316m	scamp2.S			ccna2.S
LOC108708225	LOC108705922	atl2.L		fkbp9.S	krt.S			parg.L
fntb.L	fam3d.S	klc1.L		tnfrsf19.L	ift20.L			dph6.L
rbl2.L	slc3a2	pde7a.S		caprin2	sirt1.L			hebp2.S
LOC108719572	wdr66.L	tyro3.L		LOC108708225	kndc1.L			ccdc64.L
tada2b.L	xmc.L	dctn4.L		fntb.L	gpbp1l1.L			cers2.S
plxnd1.L	xk81a1.L	exoc6.L		rbl2.L	mtus1.L			stim2.S
prdm15.L	fa2h.L	mxi1.S		LOC108719572	loc100145002.L			oxld1.S
LOC108714877	hdac11	gpi.L		tada2b.L	dsp.L			tsc2.S
flt1.S	glipr2.S	LOC100158299		plxnd1.L	capn1.L			map3k10.L
adamts3.S	rgl1	ncan		prdm15.L	ranbp2.S			map4k5.S
lmo4.2.L	b4galt1	r3hdm1.S		LOC108714877	jagn1.L			MGC83970
emx1.L	slc17a9.S	ddb2.L		flt1.S	rpl34.L			smagp.L
fgfr2.L	LOC108709394	prkag1.S		adamts3.S	pcnp.L			ipo13.S
hmx3.L	rab25.L	rhob.L		trappc10.L	elf2.S			nckipsd.L
zbtb8a.2.L	lgalsl.L	homer3.S		lmo4.2.L	rpl19.L			atp8b4.S
march8.L	pde9a.L	batf3.S		emx1.L	kiaa1191.S			raver1.S
nexn.L	rbbp8nl.L	LOC100191024		fgfr2.L	muc5b			rmdn2.S
slc15a4.L	nr1d2.L	pdcd10.L		hmx3.L	itpkb			trmt6.S
Xelaev18007522m	samd15.L	baiap2.S		zbtb8a.2.L	fam219b			cep78.L
mecom.L	Xelaev18003636m	LOC100127794.L		march8.L	otub2.S			ttc5.S
sox2.L	degs3.L	LOC108709626		nexn.L	hm13.L			spry2.S
dennd2c.L	Xelaev18038969m	kctd6.L		slc15a4.L	LOC108718070			fcho2.S
cmtm5.L	gm39120	chmp1a		Xelaev18007522m	LOC108709832			lrch2.L
nfe2l1.L	anxa9.L	ivns1abp.L		mecom.L	LOC108711693			rbm27.L
b3gnt5.S	b4galnt3.L	mex3b.L		sox2.L	LOC108708564			cldnd1.L
rin1.S	krt18.3.S	rnf14.5.S		dennd2c.L	xbp1.S			sin3a.S
fzd5.S	degs3.S	inpp4a.S		cmtm5.L	loc734020.L			fbxl17.L
rarg.L	tmem56.2.L	ywhag.L		nfe2l1.L	atp5o.L			rnf217.L
itga4.S	LOC100486385.S	slc30a9.S		b3gnt5.S	serbp1.L			fut10.L
itga3.S	evx1.L	zc3h3		rin1.S	tm9sf3.L			LOC108715416
cmip.S	trabd.S	flcn.S		fzd5.S	rpf1.S			per3.S
nell2.L	kctd15.S	tamm41.S		rarg.L	upk1b.S			svil
pla2g10.S	bpgm.L	asap2.S		itga4.S	rsl24d1.S			muc3a
dmrta2.L	p2ry11.S	rbm27.S		itga3.S	rpl32			ptp4a1.L
nipal2.S	stard4.L	polg.L		cmip.S	slc33a1.S			irf6.L
efnb1.L	post9p.L	srebf2.L		nell2.L	rras2			uxs1.L
LOC108719506	bmper.L	tnip2.S		pla2g10.S	cmtr2.L			lysmd1.S
rell2.L	sh3rf2.S	arl6.L		dmrta2.L	hmgn1.S			sgms1.L
tspan33	krt18	stk35.S		nipal2.S	wdr77.S			sgsm3.L
LOC105947324	lgalsl.S	dennd4b.L		efnb1.L	rpl23a.L			rock1.L
arhgap36.L	rasal1.L	rnf130.S		LOC108719506	dgkd-like.S			psip1
Xelaev18019323m	cdx1.S	ralgapa1.S		rell2.L	kpna4.L			gdf9.L
Xelaev18005225m	cxcl12.S	slc39a1l.L		tspan33	emc4.L			tert.L
arl6ip1.S	ovol1.L	clasp1.S		LOC105947324	rpl36a.S			uck2
tmem150b.S	gk.L	dcaf6.L		arhgap36.L	ostc.L			stxbp5.L
rasd1.S	rpe65.S	klhl24.S		Xelaev18019323m	rpap3.L			rmnd5a.L
gata3.L	c6orf132	dapl1.S		Xelaev18005225m	celf1.L			taok3.S
amotl2.L	bicd1	pxylp1.S		arl6ip1.S	psmg1.L			kiaa1456.L
gins1.S	MGC80993	Xelaev18002673m		tmem150b.S	ttc4.L			bri3bp.L
f2.L	btc.S	hnrnpll.L		rasd1.S	LOC108715906			sipa1l1.L
pax3.L	znf185.S	xl64phr		gata3.L	ssr3.S			sfxn4.L
zmynd8.S	LOC108715628	rasef.S		amotl2.L	mau2.S			rcc1.S
sorcs1.S	creb3l4.L	letm2.S		gins1.S	fau.S			fchsd1.S
zfp36l1.S	rock1	wee2.L		f2.L	golga5.L			cntln.L
fhl3.S	stard10.S	peak1.L		pax3.L	chmp1b.L			elavl2.S
stap1.L	tmem56.L	ttc5.L		zmynd8.S	tomm70a.S			ift88.S
LOC108700791	gopc.L	gs17.S		sorcs1.S	cep135.L			nipa1.L
Xelaev18039582m	b4galnt3.S	xbp1.L		zfp36l1.S	pin4.L			ppp1r15b.L
bcam.L	pprc1	anks1a.S		fhl3.S	plekhj1.L			foxa4.S
impg2	esrrg.S	pcyox1.L		stap1.L	tmem127.S			gtf3c1.L
xepsin.L	krt23.L	sorl1.L		LOC108700791	eif5.S			corin.L
sept12.L	klf5.L	cask.L		Xelaev18039582m	actb.S			snrnp35.L
cemip2	znf532.L	csnk1g3.L		bcam.L	polr3h.L			mtbp.S
itih5.L	kiaa1217.S	pdcd6.L		impg2	entpd4.L			nav3.L
kcnj2.L	LOC108717439	gpr137c.L		xepsin.L	znf721			smurf1.L
bora.L	LOC108715762	LOC108707139		sept12.L	rps5.L			mfsd11.S
LOC108717955	slc4a1.S	ccdc107		cemip2	rpl17-c18orf32			fam122a.S
capn13.S	gne.S	brca2.L		itih5.L	gtf3c4.L			rasgrp1.L
cfp.L	aldh1l1.L	tpgs2.L		kcnj2.L	eef1a1o.S			sema4g.S
sema6d.S	arhgap6	mettl16.L		bora.L	cks1b.L			afap1l1.L
slc8a1	specc1l	abhd17a.L		LOC108717955	rps23.L			cpd.S
hsf3	rnf43.L	gpd2.L		capn13.S	rps25.L			lmo7.S
arl8a.S	ano9.L	gpr22l.S		cfp.L	farp2.S			LOC108704685
atp13a-like.S	rsph1.L	calhm2.L		sema6d.S	etaa1.S			cdc20.L
lsp1.S	LOC108701743	slc12a6.S		slc8a1	rps13.L			hlx
sowahc.S	fzd6.L	ska2.L		hsf3	slc7a6.L			ankrd54.S
gal.2.S	nr6a1.S	pawr.L		arl8a.S	rpl32.L			cnksr1.L
mnt.L	atp8b3.L	letmd1.L		atp13a-like.S	cnn1.L			zbtb24.L
a4galt	gramd2b	zyg11b.S		lsp1.S	snrnp200.L			smagp.S
slc4a4.S	efnb3	mfsd14b		sowahc.S	wdr46.L			dcaf5.L
popdc2.L	LOC108701721	kiaa0100.L		gal.2.S	herpud1.L			ppp2r3a.S
slc47a2	ubp1.L	ppp1r9al.L		mnt.L	ckap4.S			bdp1.S
sptb.L	loc548390.S	med18.S		a4galt	arid3a.L			ier2.S
LOC108720136	tnni1.2.L	tmem57.L		slc4a4.S	tmed7.L			kiaa1671
inf2.S	mars2	hist1h2aa.L		popdc2.L	thap1.L			cdc42ep4
fbxo6.S	slc9a3r2.L	armc2.L		slc47a2	c9orf114.L			ssbp2.L
ackr3.S	ddx54	plxnb2.L		sptb.L	anxa4.L			usp36.S
Xelaev18047127m	mboat1.L	cited2.L		LOC108720136	cops5.S			dvl3.L
LOC108701311	fam83c.L	capn15.L		inf2.S	mrto4.S			fam234b.L
LOC108718211	ptk2b.S	tmbim1.S		fbxo6.S	hnrnpdl.S			glmp.S
limd2.L	ankrd12.S	tpcn1.L		ackr3.S	rps7.S			tubgcp5
caskin2.L	ncam1.S	scarb2.S		Xelaev18047127m	LOC108709420			cptp.L
ttll3	rarres1.L	LOC108706563		LOC108701311	bola2.L			calml4.S
col5a1.L	kit.L	myo1e.1.L		LOC108718211	slc30a7.L			habp4.L
slc38a3	gdpgp1.S	dgcr6.S		limd2.L	ywhab.L			chrna4.S
pcdh8.S	slc9a3r2.S	etv6.S		caskin2.L	bloc1s1.S			trmt44.L
Xelaev18034532m	bmp7.1.L	topors.S		ttll3	ldb1.S			itprip.L
pcca	fcn2	cdk5r2.L		col5a1.L	pa2g4.L			dr1.S
LOC108715348	elf1.S	gls.L		slc38a3	sec61b.L			brox.L
tpr	Xelaev18039754m	ccdc85c.S		pcdh8.S	upk1a.L			katnb1.S
pcdh18.S	sgsm3.S	siva1.L		Xelaev18034532m	arhgap5.S			atl3.L
fam3a.S	adgrf5	ccdc50.S		pcca	clptm1.L			rab8b.L
Xelaev18017691m	MGC81163	tnfsf11.L		LOC108715348	mier1.S			zfyve9.L
megf6.S	cdc14a.L	mef2d.L		tpr	cdh1.S			slc30a6.S
ror2.S	slc35c1.L	LOC100492708		pcdh18.S	mtf2.S			enc1.L
fkbp11.L	nek5.L	tmem255a.S		fam3a.S	eef2.1.L			creld1.L
ppp1r3c.1.L	LOC108711335	naa60.L		Xelaev18017691m	rps9			inpp5a.1.S
ventx2.1.S	mov10	trim25		megf6.S	rpl4.S			vps18.S
mespb.L	nbeal2.L	cuedc1.L		ror2.S	ugcg.S			arl10b.L
tesk1.S	myo5b.L	nkd1.S		fkbp11.L	rpl7a.S			vps50.L
loc100490316.L	dnajb9.S	slmap.L		ppp1r3c.1.L	snrpg.S			exoc8.S
arhgap4.L	MGC83169	sik2.S		ventx2.1.S	hgs.L			mfsd4b.S
cyp1c1.L	slc30a7.S	wasll.L		mespb.L	gtpbp4.L			mcm3.L
sowahc.L	LOC108699767	tspan1.S		tesk1.S	mrto4.L			arsa.1.S
adap1.L	sp7.L	st3gal1.S		loc100490316.L	golga5.S			MGC84007
prkaa2	Xelaev18017809m	naa16-like.L		arhgap4.L	afdn.S			sipa1l3.L
fam102b.S	LOC108718861	kiaa0513.L		cyp1c1.L	cpne3.L			tmem2.L
atp13a4	zbtb46.S	ctage5.L		sowahc.L	rps17.S			hmgxb4.S
cyp2d6.L	esrp1.S	tradd.L		ets1.L	mau2.L			tprn.L
slc6a20.L	spdef.S	gpkow.L		adap1.L	tcp11l2.S			kiaa1671.S
lrp4.L	fam3b.L	mapkapk2.S		prkaa2	trmt10c.L			rcor1.L
LOC108700617	kctd15.L	znf335.L		fam102b.S	cry1			pik3r4.L
cfb.L	krt5.7.S	fitm2.L		atp13a4	khdrbs1.S			acsl4.S
tead1.L	fer1l4	rnf170.S		cyp2d6.L	xbp1.L			rb1cc1.L
adrb2.L	nek2.L	gcnt3.S		slc6a20.L	thg1l.L			epb41l4b.S
atp1a1.L	atf7ip.S	aak1.S		lrp4.L	smim19.L			samd4a.S
socs4.S	slc19a2.L	tbc1d22b.S		LOC108700617	hps3.L			hspa5.S
slc25a29.L	hic2.L	usp32.S		cfb.L	mbip.L			chpt1.L
LOC108720003	figf.L	eif4enif1.S		tead1.L	ints10.L			myo5b.S
rgma.S	MGC68858	Xelaev18045296m		adrb2.L	prpf39.1.S			negr1.L
chst3.S	gas1.L	gemin2.S		atp1a1.L	cnot9			LOC108702593
limd1.L	sephs1.S	dapk1.L		socs4.S	gmeb2.L			supv3l1
syne3.L	hexd	usp38.S		slc25a29.L	brix1.S			zbtb37.S
fgfr1.S	LOC108704556	slc8a3.L		LOC108720003	c12orf10.L			srebf2.S
LOC100497556.L	slc22a4.L	fam46c.L		rgma.S	rpl7a.L			pip4p1.S
foxc2.S	mfhas1	dnajc13.S		chst3.S	eif5.L			tbc1d10a.L
mettl24.L	pvrl4.S	atl2-like.S		limd1.L	luc7l2.S			zeb2.L
abcc5	trim29.S	MGC115657		syne3.L	pcyt1a.S			mdm4.S
bhlhe22.S	uqcrq.S	kifap3.S		fgfr1.S	cachd1.L			naa15.L
p4htm.L	blvrb.L	tango6		LOC100497556.L	snx12.L			krit1.L
sema4c.S	loc100497729.L	csnk1e.S		foxc2.S	pfdn6.L			acvr1b.L
Xelaev18008648m	znf414.L	rnf19b.S		mettl24.L	wdr89.L			arhgap29.L
mob2.2.L	prdx4.L	taf4b.S		abcc5	rps13.S			ankib1.S
tbr1.S	tstd1.S	chn1.S		bhlhe22.S	zfp36l1			tmem60.L
rab40b.S	dlx3.L	loc100493164.L		p4htm.L	ywhaq.L			mex3d.L
nckap5l.L	b3gnt7.L	rad51d.L		sema4c.S	znf516.S			gdpd5.L
niban2	Xelaev18045499m	LOC108705473		Xelaev18008648m	rps3.S			sec24b.L
rassf1.L	1700007k13rik	tmem45b.L		mob2.2.L	tmem263.L			hyls1.S
hivep2.L	ndc1.L	MGC81124		tbr1.S	rpl13.S			ankrd13a.S
ppp1r14c.L	LOC108711752	smn2.S		rab40b.S	eif5a.L			Xelaev18038858m
Xelaev18041019m	tiam1.S	Xelaev18030357m		nckap5l.L	rpl7			plxnb1.L
Xelaev18019576m	dedd2.S	pomk.L		niban2	sf3b6.S			slc9a1.S
ranbp3l.S	fam83c.S	itpkc.L		rassf1.L	ssr1.S			zufsp.S
LOC108711632	tbc1d31.L	cep120.L		hivep2.L	kmt2a			unc45a.L
rasgef1a.S	LOC108699553	atg4c.L		ppp1r14c.L	cysrt1			scamp1.S
Xelaev18023478m	selk.S	dip2a.S		Xelaev18041019m	grwd1.L			tmem170a.S
xmc.S	muc17	crtc3.S		Xelaev18019576m	bcl7a.L			slc39a8.L
lrrn3.L	zbtb46.L	kiaa0922.S		ranbp3l.S	gng5.S			cdc42ep2
LOC108719089	c18orf21.L	tdgf1.1.L		LOC108711632	snrpd1.L			ppp3cc.L
cyp26a1.L	zbtb11.L	ccdc88a.S		rasgef1a.S	upf1.L			raf1.S
pnhd.L	slain2.L	ccdc62.L		Xelaev18023478m	nip7.L			tmem192.L
ventx2.2.L	elovl3.L	pias3.S		xmc.S	anp32c.S			mphosph9.L
ventx2.1.L	clic3.L	dapl1.L		lrrn3.L	prmt1.S			wwp1.S
LOC108698553	cib1.S	nckipsd.S		LOC108719089	acsl1.L			clcc1.S
Xelaev18038622m	hspa13.L	tube1.L		cyp26a1.L	nhp2.L			nfatc3.S
fgfr4.L	esrp1.L	ccdc158		pnhd.L	h3f3c.L			usp34.L
suox.S	wap	keap1.L		ventx2.2.L	ftmt.S			cse1l.S
lmo4.1.L	LOC108715896	slc34a2.L		ventx2.1.L	rpl18a.L			manbal.S
mespb.S	gmps.L	depdc4.L		LOC108698553	mier1.L			tbc1d30.L
cdh11.S	krt8.2.S	chst13.S		Xelaev18038622m	hnrnpa3.L			rnf5.S
alpl.L	ift46.L	usp15.S		fgfr4.L	tmed10.L			otud4.S
aplnr.S	tprg1l	fbxl4.S		suox.S	polr1d.1.S			ssbp2.S
tmem238.S	mbd6.S	mast4.S		lmo4.1.L	fam160b2.L			rev1.L
rapgef2.L	tusc2.S	pex1.L		mespb.S	llph.S			pitpnc1l.L
pabpc4.L	tceb3.L	smarca5.S		cdh11.S	eif3e.L			ccdc9.L
ntn3.S	pprc1.L	hgsnat.L		alpl.L	gemin4.L			mex3a.L
cdc14a.S	gnb3.L	pou2f1.S		aplnr.S	snrpe.S			tmem169.L
slc6a13.L	pdxdc1.L	ywhag.S		tmem238.S	tmco1.S			rapgef1.L
trim67.S	upk3b.L	arhgef12.L		rapgef2.L	ebna1bp2-a			otud4.L
LOC108699675	LOC108711517	mfsd12.L		pabpc4.L	ube2l3.L			hhip.L
pkdcc.2.L	vimp.S	LOC108707237		ntn3.S	rab35.L			trappc12.L
zhx1.S	igf1r.L	cyp1a1.S		cdc14a.S	srsf3.S			ripor1.L
mcm5.S	fam3c.S	filip1.S		slc6a13.L	srsf2.L			thumpd3.L
rasa3.S	atp6ap1.1.S	gbf1.L		trim67.S	snrpd2.L			abhd17a.S
tead4.S	znf593.L	pign.S		LOC108699675				wnt5b.L
cish.L	tm9sf2.L	pou5f3.3.S		pkdcc.2.L				tmem251.L
LOC108707019	klhl36.L	tcaim.L		zhx1.S				pim3.L
tekt2.L	slc35c2.S	plekhg5.L		mcm5.S				rhov.L
aebp2.L	shfm1.S	slc20a1.S		rasa3.S				dlg1
LOC108716948	zfand4.S	nfkbie.L		tead4.S				prrg4.S
fam169a.L	deaf1.L	LOC100036828		cish.L				mdh2.L
sgk1.L	ywhah.S	spdl1.L		LOC108707019				ubr2.L
slc23a2.L	galnt6	bcar3.L		tekt2.L				fez2.L
gata6.L	LOC108713175	nfxl1.L		aebp2.L				dusp5.S
klf17.L	rps21	herc1.L		LOC108716948				lpar1.S
cblb.L	afmid.L	lipe.L		fam169a.L				fgd4.L
pik3ip1.S	tab2.S	arhgap33.L		sgk1.L				cox5b.2.L
col9a2.L	tnip2.L	atp13a4.S		slc23a2.L				cdk5.L
LOC108696520	trpm5.L	fam107b.S		gata6.L				flrt3.L
sptbn2.L	nckap5l.S	wdfy3		klf17.L				pik3c2a.S
lmod1.S	mapk6.S	prrg1.L		cblb.L				rbm24.S
ackr3.L	c1galt1c1.L	camkk1.S		pik3ip1.S				sox18.L
gli1.L	fhit.L	c6orf120.L		col9a2.L				spry4.L
c10orf71	gpatch4.S	MGC76328.S		LOC108696520				tmem181.L
adcy5	map2k6.L	dop1a		sptbn2.L				pafah1b2.S
LOC108715287	tfcp2l1.S	dnajc14.L		chp1.L				atg101.L
mcm10.L	tuba1a.S	kif21a.L		lmod1.S				spry1.L
LOC108706318	LOC108710853	dap.L		ackr3.L				zc3h14.S
tacc3.L	elmod2.L	tapt1.S		gli1.L				gbf1.S
sox9.L	evpl.L	fmn2.L		c10orf71				pwwp2b.L
rnf146.S	tm9sf3.S	capn15.S		adcy5				slc29a3.S
stx3.L	ccdc71.S	uba3.S		LOC108715287				zdhhc16.S
znf362.L	twsg1.S	LOC108714398		mcm10.L				LOC108700013
myo10	tiparp.S	rev1.S		LOC108706318				bbs2.S
fam120c.S	aacs.L	borcs6.S		tacc3.L				git2.L
cnksr3.S	MGC52622	klhl7.S		sox9.L				ralgps2.S
tacc3.S	dlx6.S	magi1.L		rnf146.S				rab9a.L
fras1.L	endod1.L	dhx35.S		stx3.L				fbxo33.L
LOC108711813	gng7.L	kiaa0226l.S		znf362.L				stard5.L
gpr1.L	hivep1.L	picalm.1.L		myo10				uaca.L
bambi.S	Xelaev18043700m	b3gnt4.L		fam120c.S				oat.1.L
Xelaev18006569m	chsy1.S	prdm9.L		cnksr3.S				pgpep1
znf644.L	esyt3.S	inpp4a.L		tacc3.S				sirt6.S
arhgef38.L	arf6.L	lin54.S		fras1.L				lpgat1.L
Xelaev18037856m	LOC108699910	prss16.L		LOC108711813				LOC108696874
dhx32.L	ssr2.L	hectd4.L		gpr1.L				itsn1.L
LOC108705424	LOC108713117	rfwd2.S		bambi.S				spty2d1.S
znf462.S	scnn1a.L	usp38.L		Xelaev18006569m				tmem5.S
lmo1.L	LOC108719789	atp8a1.S		znf644.L				dolpp1.L
ephb4.S	gmppb.L	kbtbd3.S		arhgef38.L				tcp1.S
pcdh10.L	zfp91.L	arhgap11a.2.S		Xelaev18037856m				impad1.L
glrx5.L	fam212a.S	rnf41.L		dhx32.L				commd3.S
tsc22d3.L	c14orf79.L	cracr2b.S		LOC108705424				sbf2.S
LOC108720035	mfsd6.L	fam46b.S		znf462.S				fh
trim71.S	ncor2	h1foo.L		lmo1.L				LOC108713852
skor1.L	dusp8.S	trim7.S		ephb4.S				cask.S
Xelaev18006019m	osbpl2.S	trappc8.L		pcdh10.L				snx30.S
LOC108712518	bmp4.S	zfp36l2.2.L		glrx5.L				ptpn21.L
LOC108698396	eppk1.L	mgat4b.L		tsc22d3.L				LOC108699992
st6galnac2.L	rpl27a.S	znf33a.L		LOC108720035				mgat2.S
gata4.L	LOC108710484	tbc1d8		trim71.S				xbp1.L
mcoln1.L	atg12.S	ptges2.L		skor1.L				nptn.L
smc4	tmem8a.S	abcb6.L		Xelaev18006019m				LOC108718648
pvrl3.L	LOC108705484	styx.S		LOC108712518				tmem131l.L
smo	rgs19.L	dock9		LOC108698396				fbxl18.L
aldh1a3.S	srp19.S	rab21.L		st6galnac2.L				ctf2
anxa2.S	rps21.S	slc35g1.L		gata4.L				commd2.L
chrd	trpm4	tmcc2.S		mcoln1.L				LOC108719643
eml1	stard10.L	snx7.L		smc4				tjp3.S
itga5.S	dot1l.L	wasll.S		pvrl3.L				mgat4b.S
LOC108698306	LOC108701168	epha2.L		smo				slc41a2.L
pidd1.L	LOC108697654	Xelaev18031390m		aldh1a3.S				LOC108717918
id3.S	rpl29.S	camkk1		anxa2.S				racgap1.S
fam102a.L	znf282	slc15a4.S		chrd				znf407.S
cdc7.L	slc7a4.L	camsap1.L		eml1				cidec.S
esyt2.S	phldb1	eif4e3.L		itga5.S				lbh.L
mob2.2.S	hid1.S	map1lc3c.L		LOC108698306				flvcr1.S
n4bp3.L	b3gnt2.S	cep170.S		pidd1.L				atp8b4.L
auts2	LOC108709654	pik3r2.L		id3.S				lrp2.L
znf644.S	ccser2.S	c11orf96.S		fam102a.L				kat2b
LOC108696274	nectin4	exd2.L		cdc7.L				clec16a.L
enc1.2.S	tmem208.L	ccnb1.L		esyt2.S				mlxipl.L
cyp27a1	gprc5cl1.L	glce.L		mob2.2.S				LOC100489887.L
Xelaev18020975m	rpl8.L	clint1.L		n4bp3.L				cdc27.S
slc4a2.S	gosr2.L	pik3ca.L		auts2				lss.S
uhrf2.S	atf7ip.L	usp25.L		znf644.S				LOC108716797
sav1.S	Xelaev18016017m	slc30a5.S		LOC108696274				sema4b.S
zbtb8a.1.L	fundc1.L	rnf8.L		enc1.2.S				tmbim1.L
mrc2.S	nr2f6	trpv4.L		cyp27a1				itpkc.S
tbx2.L	tram1.L	kitlg.L		Xelaev18020975m				tbl1x.L
ephb4.L	xab2.L	rad51c.L		slc4a2.S				yes1.L
LOC108701215	rbms2.L	lrrc16a.L		uhrf2.S				popdc3.S
lct.1.L	cope.S	inf2.L		sav1.S				b4galt5.L
fam53c.L	irak1bp1.S	hectd4.S		zbtb8a.1.L				LOC108718109
mid1	usp49.S	loc108648340.L		mrc2.S				eif4enif1.L
MGC81337	clk3.S	znf577.S		tbx2.L				bdp1.L
rapgef2.S	gnai3.S	cgnl1.S		ephb4.L				kif27
frzb.S	chsy1.L	filip1.L		LOC108701215				adarb1.L
c1orf198	atp11c.L	atp9b.L		lct.1.L				r3hdm4.S
otx1.L	rbm38.S	colgalt2		fam53c.L				hras.L
caprin2.S	eps8l2.S	zswim4.L		mid1				gdf1.L
mig30.S	znf581.S	tmem57.S		MGC81337				gpr155.L
atp1a1.S	clcn5.L	nlk.L		rapgef2.S				ppp1cc.L
ankrd10.L	derl1	zyg11b.L		frzb.S				ccdc71l.L
rgs3.S	arglu1.L	LOC108709196		c1orf198				bcdin3d.L
LOC108707159	LOC108718942	LOC108719557		otx1.L				mcl1.S
Xelaev18003283m	uspl1-like.L	haus3.L		caprin2.S				apitd1.L
tmem138.L	tanc2	bnipl.L		mig30.S				cenpn.L
xicl	mlec.L	dph3.L		atp1a1.S				tnrc18
Xelaev18026877m	hsf2.L	dock4.L		ankrd10.L				aim1.L
xvent-2b	tubb	pacs2.L		rgs3.S				fam208b.S
fank1.L	rnf114.S	aktip.L		LOC108707159				fbxo10.L
gpr143.L	mansc1	Xelaev18030392m		Xelaev18003283m				fhdc1
sh2b2.L	sec61a1.S	MGC85058		tmem138.L				mapkapk5.S
bod1	arnt.S	pou5f3.3.L		xicl				ptk2.L
polr3gl.L	mrpl27.L	LOC108708627		Xelaev18026877m				MGC76328.L
farp2.L	slc17a9.L	pigb.S		xvent-2b				fam84b.S
foxn3.S	timm17a.L	appl2.L		fank1.L				cse1l.L
ddx23.L	psmb3.L	optn.S		gpr143.L				hspa5
armc1	pmm2.L	c1orf116.L		sh2b2.L				ide.S
loc100494211.S	mfsd2a.S	lpar6.L		bod1				MGC115273
LOC108703537	prelid1.L	akap9		polr3gl.L				oat.1.S
klf13.L	gm20188	Xelaev18000483m		farp2.L				LOC100492708
adcy5.S	lpcat4.S	poc5.L		foxn3.S				ripor3.S
foxn3.L	ppil3.S	LOC108695555		ddx23.L				rnmtl1.L
znf341.L	tnfsf10l.L	immp1l.L		armc1				cyp4b1
Xelaev18000592m	alg2.L	sertad2.S		loc100494211.S				rhov.S
enc1.2.L	oraov1.S	klhdc10		LOC108703537				sbk1l.S
ahcyl2.S	leng8.S	cdca7		klf13.L				Xelaev18000237m
aplp2.L	pcgf3	papd5.S		adcy5.S				arl5b
endod1	znf628.S	LOC108714146		foxn3.L				col24a1.L
lhfpl2.S	arf1.L	cdc6.S		znf341.L				dmxl2.S
LOC108700185	afap1l2.L	gatsl3.L		Xelaev18000592m				gpr160.L
tmem238	utp18.L	akap9.S		enc1.2.L				anapc7.L
retn.2.L	poc1a.L	mfsd14a		ahcyl2.S				dtx2.L
Xelaev18009472m	gosr1.L	tdh.S		aplp2.L				rab21.S
nr1i2.L	ptger4.S	xpo6.S		endod1				snai1.S
loc108718659.L	ptafr.L	pigv-like.L		lhfpl2.S				plekhg1.L
loc108715171.S	elmo1.L	dnajc13.L		LOC108700185				shroom2
znf208	c5orf15.S	xpo6.L		tmem238				gas6.L
ccng1.S	zfr.L	LOC108701404		retn.2.L				smad1.L
cblb.S	sirt1.S	vcpip1.S		rhou.L				nfatc3.L
pank1.L	utp15.L	fam20b.S		Xelaev18009472m				slc2a13.L
arl4a.L	atp6v0a2.L	zswim4.S		nr1i2.L				Xelaev18031388m
fblim1.S	chrna2.S	LOC108695571		loc108718659.L				pcyox1l.L
LOC108712665	zfp36.L	sox18.S		loc108715171.S				tubd1.L
ifltd1.S	timm17a.S	grem1.L		znf208				cog3.L
larp6.S	vhl.S	btg-x		ccng1.S				chst13.L
plscr3.L	slc35a3.2.S	foxi2.S		cblb.S				parn.L
clcn3.S	ctps1.S	LOC108719533		pank1.L				tollip.S
slitrk5.L	ccdc173.L	arhgap18.L		arl4a.L				spg11.L
Xelaev18002117m	chkb.S	loc733556.L		fblim1.S				mrps16.L
atp1b3.S	tcim.L	slc20a2.L		LOC108712665				nufip2.S
smo.L	uba52	kcnj5.L		ifltd1.S				pgap1.L
setd1b.L	cltc.L	ccna1.L		larp6.S				bix1.1.L
cdknx.L	eif4e.L	nlk.S		plscr3.L				golph3l.S
wwtr1.S	kmt5b.L	fam109b.L		clcn3.S				c1orf52.L
dynll2	ap1s3	klhdc10.L		slitrk5.L				ano1.L
afap1l2.S	fam195a.L	cracr2b.L		Xelaev18002117m				rfxap.S
pmp22.S	slc35a2.L	ccnb1.S		atp1b3.S				cnksr2.L
col9a3.L	c12orf43.L	ubl7.L		smo.L				gga1.L
nrp2.L	ptrh2.L	ern2.S		setd1b.L				aebp2.S
col9a1.L	rpl37.L	kiaa0586.L		cdknx.L				LOC108708787
phactr2.L	zfand5.S	patl2.L		wwtr1.S				wdr47.S
fam83f.L	acy3.L	ap4e1.S		dynll2				arhgap27.L
LOC108715129	tmem183a.L	onecut1.2.S		afap1l2.S				rasd1.L
eaf1.L	LOC108713924	dock9.L		pmp22.S				eif2ak3.S
has1.S	mpdu1.L	arl5c.L		col9a3.L				nuak1
rassf8.S	ap1m2.L	pou3f1.L		nrp2.L				lrrc56.L
klf10.L	cep170b.L	emilin2.L		col9a1.L				cpeb3.L
Xelaev18001689m	LOC108717923	rilp.S		phactr2.L				taok3.L
shb.L	herpud1.S	arhgap26.S		fam83f.L				map3k4.S
ccnt1.S	kiaa1324l.S	Xelaev18023494m		LOC108715129				galnt6.1.S
znf217.S	foxo4.L	neurl1b.L		eaf1.L				dusp5.L
tmem52.S	LOC108713255	sbk1.L		has1.S				sec24b.S
id2.L	tcf3.L	ccndx.S		rassf8.S				fgf8.S
slc5a8.L	cln3.L	vps13d.L		klf10.L				phkg2.L
tm2d1.L	mfsd6l.L	dand5.L		Xelaev18001689m				lysmd4.L
fam198a.L	cyp4b1.2.L	fry.L		shb.L				lrmp.L
LOC108703739	arid3a.S	lpar6.S		ccnt1.S				dusp6.S
disp1.L	myl6.S	foxi2.L		znf217.S				arap3
LOC108707147	knl1	foxh1.2.L		tmem52.S				ttbk2.L
mpzl2.L	ndufc2.S	cldn5.L		id2.L				fam46c.S
lrrn3.S	LOC108702843	ccno.S		slc5a8.L				ssx2ip.L
hydin.S	c10orf88.L	rgl2		tm2d1.L				tmem45b.L
nipal2.L	bcl2l12.S	tgds.S		fam198a.L				parn.S
hs3st3a1.L	rpl36.S	MGC68639		LOC108703739				ccdc3.L
Xelaev18002137m	rpl36.L	LOC108719547		disp1.L				cpsf4.L
ror2.L	ankhd1	dand5.S		LOC108707147				nanp.L
lmo4.2.S	isg20l2.S	Xelaev18011386m		mpzl2.L				fbxo45.L
nkx2-3.S	tctex1d2.L	cxorf21.S		lrrn3.S				slc9a7
pbx2.L	uqcr10.L	ptger4.L		hydin.S				ern2.L
atp1b1.L	micos13	fos.S		nipal2.L				fbxl15.L
fmc1.L	utp15.S			hs3st3a1.L				slc33a1.L
unk.S	elovl7.L			Xelaev18002137m				rabgap1l.L
MGC81482	slc22a5.L			ror2.L				znrf3.L
ilk.S	ifrd1.L			lmo4.2.S				bmp7.2.L
nkd1.L	c11orf68.L			nkx2-3.S				bix1.3.L
LOC108720014	ccnt1.L			pbx2.L				loc100495271.S
dusp11.2.L	chmp4b.S			atp1b1.L				apcdd1.S
slc16a6.L	dnajb12.S			fmc1.L				ankib1.L
itgb3.L	dph2.L			unk.S				mkl2.L
LOC108715064	ptma.S			MGC81482				camsap2
rnf44.L	sec61a1.L			ilk.S				plekhg4.L
LOC108701786	pars2.L			nkd1.L				atad3a.S
epn1.S	upk1b			LOC108720014				zdhhc9
mzt1.L	rpl17.S			dusp11.2.L				rbm38.L
tbx2.S	MGC64308			slc16a6.L				tbc1d1.S
kiaa1549.S	tia1.S			itgb3.L				MGC115216
LOC108700983	hypk.S			LOC108715064				usp16.S
krt18.S	rpl37a.L			rnf44.L				rel.S
usp43	dnajb12.L			LOC108701786				antxr2.S
guca1a.S	slc44a2.S			epn1.S				crem.L
plxna2.S	actb.L			mzt1.L				tnfrsf1a.S
srgap2.S	zmynd10.L			tbx2.S				LOC108704394
msx2.S	m6pr.L			kiaa1549.S				clic1.S
rfwd3.S	nop10			LOC108700983				tmem18.S
stk40.S	gnaq.L			krt18.S				zfyve9.S
akap2.S	wdr48.L			usp43				snx10.L
polr2k.S	zfc3h1.L			guca1a.S				c1galt1c1.S
fn1.S	ankrd46.S			plxna2.S				LOC108706119
trim8	sbno1.L			srgap2.S				tmcc1.S
LOC108719513	hspa8.L			msx2.S				exd1.L
dstyk.S	sec61g.L			rfwd3.S				cxcl11.L
crb2.L	rps27a.S			stk40.S				nufip2.L
Xelaev18024078m	LOC108701166			akap2.S				dcaf12.L
fbxo21.S	znf654.S			polr2k.S				rabgap1l.S
baz2b.S	tmem63a.L			fn1.S				ier2.L
ell2.S	unknown.S			trim8				pik3r2.S
cdk17.L	upf3b.S			LOC108719513				dis3l2.L
fblim1.L	srpra.L			dstyk.S				dpy19l4.S
ccdc85c.L	sgpp1.L			crb2.L				nde1.L
LOC108708347	cks2.S			Xelaev18024078m				dctpp1.L
rnf144b.S	h1fx.S			fbxo21.S				kiaa1841.L
larp7	trappc13.S			baz2b.S				fgd6.S
zdhhc17.L	strap			ell2.S				macc1.L
slc10a3.S	tsc1.S			cdk17.L				scyl2.L
avp.L	kat5.L			fblim1.L				saysd1.L
tiam1.L	scamp2.S			ccdc85c.L				efhd1.L
cited4.L	krt.S			LOC108708347				mov10l1.L
phactr4.L	ift20.L			rnf144b.S				rita1.S
arhgef26.S	sirt1.L			larp7				f2rl1.S
ndrg4.L	kndc1.L			zdhhc17.L				plk3.S
mlxip.L	gpbp1l1.L			slc10a3.S				nr2f1.L
LOC100189574	mtus1.L			avp.L				stc1.L
LOC108715723	loc100145002.L			tiam1.L				chmp1a.S
zbtb8a.1.S	dsp.L			cited4.L				sowahb.L
asb1.L	capn1.L			phactr4.L				tdgf1.3.L
bcorl1.L	ranbp2.S			arhgef26.S				lonrf3.S
pcgf1.S	jagn1.L			ndrg4.L				baz1a.S
capn2.2.L	rpl34.L			mlxip.L				amfr.S
znf750.L	pcnp.L			LOC100189574				plekhg5.L
dnah12.L	elf2.S			LOC108715723				chst8.S
agrn	rpl19.L			zbtb8a.1.S				irgq.L
rassf8.L	kiaa1191.S			asb1.L				arhgef28.S
zbed6cl.L	muc5b			bcorl1.L				bix1.2.L
rpusd1.L	itpkb			pcgf1.S				ankrd13c.S
LOC108704158	fam219b			capn2.2.L				stx5.S
fbxw2.S	otub2.S			znf750.L				psme3.S
pank3.S	hm13.L			dnah12.L				hhipl1.L
hdac10.L	LOC108718070			agrn				kbtbd8.S
parp1.L	LOC108709832			rassf8.L				hexdc.L
cep63.L	LOC108711693			zbed6cl.L				zfand2a.L
gcnt1.S	LOC108708564			rpusd1.L				cgnl1.L
trim36.S	xbp1.S			LOC108704158				nipa2.S
loxl1.L	loc734020.L			fbxw2.S				not.L
znf292.S	atp5o.L			pank3.S				ptpn14.L
cyp27a1.L	serbp1.L			hdac10.L				ccny
psd3	tm9sf3.L			parp1.L				rasl11b.S
slc25a24.S	rpf1.S			cep63.L				dgke.S
fxyd3	upk1b.S			gcnt1.S				fam20b.L
tcf7l1.S	rsl24d1.S			trim36.S				rab11fip3.S
b4galt3.L	rpl32			loxl1.L				plekhg3.L
sema6d.L	slc33a1.S			znf292.S				scn1b.S
gramd1a.L	rras2			cyp27a1.L				tubgcp3.S
smad7.L	cmtr2.L			psd3				Xelaev18008577m
Xelaev18019575m	hmgn1.S			slc25a24.S				Xelaev18019163m
znf618	wdr77.S			fxyd3				cdc14b.L
znf219.L	rpl23a.L			tcf7l1.S				adcyap1.S
lrrc24.L	dgkd-like.S			b4galt3.L				alg11.L
enoph1.S	kpna4.L			sema6d.L				pigg.S
zdhhc21.L	emc4.L			gramd1a.L				dnajb5.L
rab11fip3.L	rpl36a.S			smad7.L				prickle4.S
ralgds.S	ostc.L			Xelaev18019575m				sgcb.S
gtf2ird2b	rpap3.L			znf618				LOC108704627
c5orf30.S	celf1.L			znf219.L				smarcc2.S
e2f1.S	psmg1.L			lrrc24.L				ston2.S
pced1a.S	ttc4.L			pdk4.S				grk6.S
mespa.S	LOC108715906			enoph1.S				larp1b.S
camta1	ssr3.S			zdhhc21.L				lpar5.S
slc35d2	mau2.S			rab11fip3.L				pot1.L
apeh.L	fau.S			ralgds.S				gm29884
lin28a.L	golga5.L			gtf2ird2b				Xelaev18024710m
tonsl.L	chmp1b.L			c5orf30.S				LOC108717350
loc495835.L	tomm70a.S			e2f1.S				erbb4.L
bcr.S	cep135.L			pced1a.S				shox2
snx33.L	pin4.L			mespa.S				LOC108704130
LOC108713986	plekhj1.L			camta1				nodal2.L
tgif1.S	tmem127.S			slc35d2				Xelaev18001619m
LOC108716719	eif5.S			apeh.L				atp8a1.L
capn8.1.S	actb.S			lin28a.L				gadd45g.L
LOC108708505	polr3h.L			tonsl.L				atxn3.L
zmiz2.S	entpd4.L			loc495835.L				esco1.L
ipmk.L	znf721			bcr.S				cep76.L
gatd3b	rps5.L			snx33.L				hlcs.L
gatm.S	rpl17-c18orf32			LOC108713986				elk4.S
kcnk6.L	gtf3c4.L			tgif1.S				olig4.L
znf451	eef1a1o.S			LOC108716719				etv3l.S
plec.S	cks1b.L			capn8.1.S				cep112
LOC108716737	rps23.L			LOC108708505				sel1l.S
LOC108717369	rps25.L			zmiz2.S				plxnb3.S
mis12.L	farp2.S			ipmk.L				wdr90.L
zbtb44.L	etaa1.S			gatd3b				pou2f1.L
pdp1.L	rps13.L			gatm.S				rab33b.L
nrdc.L	slc7a6.L			kcnk6.L				brinp3
ciz1.L	rpl32.L			znf451				aco2.L
peli1.L	cnn1.L			plec.S				Xelaev18001443m
kcne5.L	snrnp200.L			LOC108716737				tnfaip8.S
thumpd2.L	wdr46.L			LOC108717369				rdh9.L
mgea5.L	herpud1.L			mis12.L				dmxl1.L
ptpn4.S	ckap4.S			zbtb44.L				Xelaev18001896m
cdca7.S	arid3a.L			pdp1.L				Xetrov90029963m.L
ccdc71l.S	thap1.L			nrdc.L				pcdh8.2.S
apoc1-like.L	c9orf114.L			ciz1.L				gpr65.L
erbb3.L	anxa4.L			rcan3.L				prdm14.L
slc6a8.S	cops5.S			peli1.L				btg2.S
gprc5c.S	mrto4.S			kcne5.L				akap10.L
sema4a.S	hnrnpdl.S			thumpd2.L				golga2
ahnak.S	rps7.S			mgea5.L				LOC108703769
cd276.L	LOC108709420			ptpn4.S				tank.S
mpv17l.S	bola2.L			cdca7.S				rnf219.L
gigyf2.S	slc30a7.L			ccdc71l.S				picalm.1.S
atp1b3.L	ywhab.L			apoc1-like.L				lrp8.L
LOC108715172	bloc1s1.S			erbb3.L				Xelaev18034023m
LOC108699904	ldb1.S			slc6a8.S				spry2.L
fam107a.S	pa2g4.L			gprc5c.S				tspan1.L
fam13a.S	sec61b.L			sema4a.S				edem3.L
sfrp2.S	upk1a.L			ahnak.S				slc44a4.L
Xelaev18029805m	arhgap5.S			cd276.L				npy2r-like.1.L
rbm23.L	clptm1.L			mpv17l.S				ripk1.L
arfgap3.S	mier1.S			gigyf2.S				tank.L
phldb1.S	cdh1.S			atp1b3.L				parpbp.S
adcy9.S	mtf2.S			LOC108715172				Xelaev18033527m
itga5.L	eef2.1.L			LOC108699904				Xelaev18001472m
tfe3.S	rps9			fam107a.S				lzts1.S
hunk.S	rpl4.S			fam13a.S				scn2b.L
med10	ugcg.S			sfrp2.S				LOC108718446
rbms1.S	rpl7a.S			Xelaev18029805m				LOC100490741.L
esg2-a	snrpg.S			rbm23.L				dnajb14.S
LOC108719648	hgs.L			arfgap3.S				hes7.2.L
jag1.L	gtpbp4.L			phldb1.S				LOC108698354
dusp4.L	mrto4.L			adcy9.S				nuak2.S
pou5f3.1.S	golga5.S			itga5.L				trpm8b.L
gpc4.S	afdn.S			tfe3.S				hes7.2.S
eif4a2.L	cpne3.L			hunk.S				pitx3.L
mapk8ip1	rps17.S			med10				LOC100491090.L
znf800.L	mau2.L			rbms1.S				kitlg.L
klhl25.L	tcp11l2.S			esg2-a				ifrd2.S
rab11fip4l.L	trmt10c.L			LOC108719648				dgkh
gatm.L	cry1			jag1.L				mix1.S
plpp3.S	khdrbs1.S			dusp4.L				cass4.L
nt5dc3.S	thg1l.L			pou5f3.1.S				zbtb18.S
znf518a.L	smim19.L			gpc4.S				lhx5.S
c2orf42.L	hps3.L			eif4a2.L				ednra.S
myo10.2.L	mbip.L			mapk8ip1				cdk5r2.S
ncoa2.L	ints10.L			znf800.L				irs2
metrnl.L	prpf39.1.S			gyltl1b.L				rem1.L
mgc69520.S	cnot9			klhl25.L				styx.L
ctdsp2.S	gmeb2.L			rab11fip4l.L				cnst.S
prkce	brix1.S			gatm.L				lrp8.S
mmrn2.L	c12orf10.L			plpp3.S				homeobox100496651-provi
cenpc.L	rpl7a.L			nt5dc3.S				mos.L
rgs11.L	eif5.L			znf518a.L				stx19.S
acer3.S	luc7l2.S			c2orf42.L				zfp36
kiaa1614.L	pcyt1a.S			myo10.2.L				pip5k1b.L
foxa1.L	cachd1.L			ncoa2.L				cmtm4.S
gse1.L	snx12.L			metrnl.L				loc108648340.L
wdfy2.L	pfdn6.L			mgc69520.S				nfkb1.S
pou5f3.1.L	rps13.S			ctdsp2.S				osr1.S
arhgef3.2.L	zfp36l1			prkce				naa15.S
LOC108698093	ywhaq.L			mmrn2.L				tmem255a.L
c15orf39.L	znf516.S			cenpc.L				mb21d2.S
ufc1.S	rps3.S			rgs11.L				ppp1cc.S
stox2.L	tmem263.L			acer3.S				rasl11b.L
rarg.S	rpl13.S			kiaa1614.L				shh.S
mgc75753.S	eif5a.L			foxa1.L				tvp23a.S
zmynd8.L	rpl7			gse1.L				grhl1.S
cry1.L	sf3b6.S			wdfy2.L				mob3c.S
slc6a14.2.L	ssr1.S			pou5f3.1.L				Xelaev18000337m
Xelaev18006061m	kmt2a			arhgef3.2.L				pex13
ccnd2.S	grwd1.L			LOC108698093				usp46.L
dzip1.L	bcl7a.L			c15orf39.L				LOC108700571
yeats4.S	gng5.S			ufc1.S				hsp70.L
prr12.L	snrpd1.L			stox2.L				foxr1.L
fam174b.S	upf1.L			rarg.S				mthfr.L
zfp36l2.S	nip7.L			mgc75753.S				MGC85058
LOC108710017	anp32c.S			zmynd8.L				ntmt1.S
prss33	prmt1.S			cry1.L				gsc.S
Xelaev18044534m	acsl1.L			slc6a14.2.L				st6gal1.L
wdr12.S	nhp2.L			Xelaev18006061m				itprip.S
LOC108697537	h3f3c.L			ccnd2.S				cux2.L
znf703.S	ftmt.S			dzip1.L				rgs4.S
znf268.L	rpl18a.L			yeats4.S				pdgfa.L
rbm45.L	mier1.L			prr12.L				bmp7.2.S
krt8.L	hnrnpa3.L			fam174b.S				Xelaev18032855m
peli2.L	tmed10.L			zfp36l2.S				mb21d2.L
Xelaev18017186m	polr1d.1.S			LOC108710017				LOC108705533
usp21	fam160b2.L			prss33				lhx8.S
spsb3	llph.S			Xelaev18044534m				kank1.S
LOC108706094	eif3e.L			wdr12.S				msantd3.L
stag2.S	gemin4.L			LOC108697537				hoxc12.L
Xelaev18042341m	snrpe.S			znf703.S				blcap.S
cnrip1.L	tmco1.S			znf268.L				ptgs2.L
prdx5.L	ebna1bp2-a			rbm45.L				Xelaev18010890m
hs3st3a1.S	ube2l3.L			krt8.L				Xelaev18000483m
tob2.S	rab35.L			peli2.L				slc18a2.L
kdm2b.L	srsf3.S			Xelaev18017186m				arl15.S
schip1.S	srsf2.L			usp21				pef1.S
LOC108719535	snrpd2.L			spsb3				fgd4.S
lin9.S				LOC108706094				pigb.L
LOC108711758				stag2.S				flrt3.S
arhgef40.S				Xelaev18042341m				lefty.L
bahcc1.S				cnrip1.L				grhl1.L
numb.L				prdx5.L				sox3.L
reln.L				hs3st3a1.S				nodal1.S
b3gnt7.S				nos1ap.L				sel1l3.L
epas1.S				tob2.S				larp6-like.1.L
dtl.S				kdm2b.L				gsc.L
wdr83os.S				schip1.S				errfi1.S
ubtd1.L				LOC108719535				lrriq3.S
rrp8.S				lin9.S				vegt.S
git1.L				LOC108711758				itgb8.L
vcan.L				arhgef40.S				arhgap20
ahdc1.L				bahcc1.S				gdf3.S
als2-like.L				numb.L				cacnb1.S
ccng2.L				reln.L				plekhg3
fsbp-like.L				b3gnt7.S				hprt1.L
cacnb4.S				epas1.S				wnt5b.S
fzd5.L				dtl.S				dusp1.S
mgc75753.L				wdr83os.S				usp53.L
mgea5.S				ubtd1.L				slc9a1.L
ccnb3.S				rrp8.S				ston2.L
rbak-rbakdn				git1.L				c14orf166.S
LOC108703993				vcan.L				mfsd6.S
nfil3				ahdc1.L				vps37a.S
mta1.L				als2-like.L				ago1.L
rbbp8.L				tgif2.S				dus4l.L
pi4k2b.L				ccng2.L				ralgps2.L
atf7.L				fsbp-like.L				coq10b.L
klf6.L				cacnb4.S				zdhhc12.L
dnaja4.2.S				fzd5.L				LOC108714033
nrp2.S				mgc75753.L				amigo2
acsf2.L				mgea5.S				hoxc9.L
rbm26.L				ccnb3.S				wnt16.L
adcy6.L				rbak-rbakdn				lcorl.S
Xelaev18002446m				LOC108703993				xhoxc8
tfap2a.L				nfil3				chst8.L
id3.L				mta1.L				ankrd13c.L
mapk6.L				rbbp8.L				egr4.S
myo9b.S				pi4k2b.L				stard13.L
elp5				atf7.L				vgll3.L
pgbd4				klf6.L				insm1.S
slc22a23.L				dnaja4.2.S				trarg1.L
ncoa6.L				nrp2.S				ptgs2.S
c5orf30.L				acsf2.L				cdc42se2-like.2.L
ccnb3.L				rbm26.L				stx19.L
elmo1.S				adcy6.L				adra2a.L
Xelaev18032193m				Xelaev18002446m				trim2.L
f2rl1.L				tfap2a.L				jun.S
mta1				id3.L				fut1.S
ccne2.S				mapk6.L				tbp.L
camk1g				myo9b.S				junb.S
gpatch8.S				elp5				wnt8a.S
tab3.L				pgbd4				fgf20.S
top2a.L				kirrel2.L				birc7.S
xkr5.L				slc22a23.L				pigc.L
Xelaev18003895m				ncoa6.L				arhgap11a.2.L
calm1.L				c5orf30.L				paqr8.L
kcnq1.L				ccnb3.L				Xelaev18038459m
wrb.S				elmo1.S				has2.L
LOC108711131				Xelaev18032193m				nptx2.S
irak2.L				f2rl1.L				tfap2c.S
LOC108705295				mta1				ccdc125.S
MGC52759				ccne2.S				onecut1.2.S
lsm14b.L				camk1g				mitd1.L
nek6.S				gpatch8.S				thsd7a.S
dck.2.L				tab3.L				mcf2l
fth1a				top2a.L				shank2.S
zbtb45.L				xkr5.L				dguok.L
kmt2e.S				Xelaev18003895m				mix1.L
LOC108695509				calm1.L				phospho1.S
ptmap12.S				kcnq1.L				foxj1.L
rbl1.L				wrb.S				ache.S
tubb2b.L				LOC108711131				tat.S
znf319.S				irak2.L				stard13.S
arhgef2.S				LOC108705295				yrdc
tada2b.S				MGC52759				LOC108718425
mfge8.L				lsm14b.L				fam126a.S
inpp5k.L				nek6.S				pou3f1.S
cdc25b.S				dck.2.L				prr14l.L
mycl.L				fth1a				LOC108699131
fth1.L				ptpn13.L				nlrc3
creb1.L				zbtb45.L				chrm4.L
fam64a.L				kmt2e.S				LOC108704510
chn1.L				LOC108695509				grhl3.L
pcif1.L				ptmap12.S				nodal.S
foxo3.L				rbl1.L				dhx58.L
pdha1.S				tubb2b.L				nodal1.L
draxin				znf319.S				mafa.S
sema4c.L				arhgef2.S				socs1.S
alcam.L				tada2b.S				onecut2.S
det1.L				mfge8.L				apold1.L
dhx33.L				inpp5k.L				ltbr
proser1.S				cdc25b.S				ppp1r16b.S
fyb.S				mycl.L				menf.1.L
proser1.L				fth1.L				lefty.S
cramp1.S				creb1.L				grhl3.S
nadk2.S				fam64a.L				LOC108712674
ptch2.L				chn1.L				abcb1
jund				pcif1.L				btg5.L
cnnm3.L				foxo3.L				LOC108699863
tmco3.L				pdha1.S				cebpb.S
nos1ap.S				draxin				plk3.L
klhl21				sema4c.L				pygo1.L
LOC108704271				alcam.L				LOC108705749
cenpj.L				det1.L				plekhg2.S
maats1				dhx33.L				egr4.L
b4galt6.L				proser1.S				socs1
has-rs.S				fyb.S				Xelaev18009570m
LOC108718634				proser1.L				loc733556.S
tcf7l1.L				cramp1.S				foxj1.S
mknk2.S				nadk2.S				il18.L
kdm6a.S				ptch2.L				klf2.L
vgll4l.S				jund				slc35a4.L
rybp.S				cnnm3.L				dmrt2.L
rfx5.S				tmco3.L				eva1a.L
tubb.L				nos1ap.S				f3.L
dyrk2				klhl21				atp12a
rbm14.L				LOC108704271				MGC83539
prdm10.S				cenpj.L				grm1.S
bach2.S				maats1				nodal3.1.L
prr5l.L				b4galt6.L				zfp36l2.1.S
c22orf39.L				has-rs.S				nr4a1.L
sptbn1				LOC108718634				myod1.L
whsc1l1.L				tcf7l1.L				cnksr2
esco2.S				mknk2.S				fosl1.S
mettl7a.L				kdm6a.S				olig3.S
kdm6a				vgll4l.S				rassf9.S
krasl.S				rybp.S				ptger4.L
zdhhc21.S				rfx5.S				hs3st1.L
cdk16.L				tubb.L				fgf3.S
esyt2.L				dyrk2				nodal3.2.L
slc26a11.L				rbm14.L				LOC108711579
grasp.S				prdm10.S				nodal.L
ptch1.L				bach2.S				map3k13.L
gramd1a.S				prr5l.L				egr2.L
mycl.S				c22orf39.L				fos.L
cerk				sptbn1				egr1.L
hes6.1.S				whsc1l1.L				fosl1.L
midn.S				esco2.S				cxcl8.S
Xelaev18038135m				mettl7a.L
pcif1.S				kdm6a
ghitm.S				krasl.S
morf4l1.L				zdhhc21.S
nt5c1a				cdk16.L
atrx.L				esyt2.L
syne2.2.S				slc26a11.L
MGC82989				dnmbp.L
cables2.L				grasp.S
ric1.S				ptch1.L
znf106.L				gramd1a.S
rere				mycl.S
chrd.2.L				cerk
LOC108709261				hes6.1.S
crebbp.S				midn.S
rreb1.L				Xelaev18038135m
cep250.S				pcif1.S
gnai2				ghitm.S
dgat1.L				morf4l1.L
pcdh1.L				nt5c1a
eral1.L				atrx.L
kdm6b.S				syne2.2.S
nav2.L				MGC82989
chrd.L				cables2.L
celsr1				ric1.S
spred2.L				znf106.L
tomm7.L				rere
Xelaev18038498m				chrd.2.L
smarcd3				LOC108709261
spop.S				crebbp.S
rere.S				rreb1.L
kansl1				cep250.S
sfpq.L				gnai2
mbd1.S				dgat1.L
rbmx.L				pcdh1.L
prc1.2.L				eral1.L
gtf2ird2				kdm6b.S
cdca7.L				nav2.L
MGC84997				chrd.L
plekhn1.S				celsr1
ehd1.L				spred2.L
kif11.S				tomm7.L
c18orf54.S				Xelaev18038498m
smad4.1.L				smarcd3
grsf1.L				spop.S
LOC108710532				rere.S
spsb4.L				kansl1
sfr1.L				sfpq.L
lasp1.L				mbd1.S
clcn3.L				rbmx.L
traf3ip1.L				prc1.2.L
lamc1.S				gtf2ird2
LOC108719519				cdca7.L
shroom2.L				MGC84997
e2f7.S				plekhn1.S
LOC100495010.S				ehd1.L
sema3a.L				kif11.S
tfdp1.L				c18orf54.S
pnisr.L				smad4.1.L
sgk223.L				grsf1.L
ovol2				LOC108710532
mcrs1.S				spsb4.L
endou.S				sfr1.L
phldb3.L				lasp1.L
lef1				clcn3.L
msantd4.S				traf3ip1.L
hnrnpa1.S				lamc1.S
ttf2.S				LOC108719519
ptbp3.L				shroom2.L
fndc3a.L				e2f7.S
dlc1				LOC100495010.S
rnf2.S				sema3a.L
igf1r.S				tfdp1.L
rnaseh2b.L				pnisr.L
ano5.L				sgk223.L
LOC108713946				ovol2
phrf1.S				mcrs1.S
efna4.L				endou.S
rpl29.L				phldb3.L
usp6nl.S				lef1
dnase1l3				msantd4.S
cdip1.L				hnrnpa1.S
khdc4				ttf2.S
itpr2				ptbp3.L
asxl1.S				fndc3a.L
gmeb1.L				dlc1
rfwd3.L				rnf2.S
hnrnpl.L				igf1r.S
pan2.L				rnaseh2b.L
znf608				ano5.L
rbm12.L				LOC108713946
asb7.L				phrf1.S
rrm2.2.L				efna4.L
LOC100485290.L				rpl29.L
accs.L				usp6nl.S
paxip1.S				dnase1l3
r3hdm2.L				cdip1.L
zfx.L				khdc4
sptan1.L				itpr2
gigyf1.L				asxl1.S
tmem79.L				gmeb1.L
uimc1.L				rfwd3.L
aamp.L				hnrnpl.L
casc4.S				pan2.L
cep152.S				znf608
etv1.L				rbm12.L
krt18.L				asb7.L
znf292.L				rrm2.2.L
tmem222.L				LOC100485290.L
aurkb.L				accs.L
tulp3.L				paxip1.S
gnai2.S				r3hdm2.L
luc7l3.S				zfx.L
rad51.L				sptan1.L
LOC397846				gigyf1.L
sf3b5.S				tmem79.L
zswim5				uimc1.L
rbm12b.L				aamp.L
ncapd2.S				casc4.S
pcdh19				cep152.S
aasdh.L				etv1.L
vgll4.L				krt18.L
scin.L				znf292.L
surf6.L				tmem222.L
fnbp1l				aurkb.L
tmem111.L				tulp3.L
dph7.L				gnai2.S
marcksl1.L				luc7l3.S
hist2h2ab.S				rad51.L
ggt1.L				LOC397846
krt5.1b				sf3b5.S
slc50a1.L				zswim5
tcp11l2.L				rbm12b.L
c21orf91.L				ncapd2.S
gpc4.L				pcdh19
acvr1.L				aasdh.L
tmsb4x.L				vgll4.L
hnrnpa3.S				scin.L
mtfr1l.S				surf6.L
arid3b.L				fnbp1l
fhdc1.L				tmem111.L
acads.L				dph7.L
gpbp1l1.S				marcksl1.L
dhcr7.S				hist2h2ab.S
slc25a28				ggt1.L
znf516.L				krt5.1b
yeats4.L				slc50a1.L
cdon.L				tcp11l2.L
rps29				c21orf91.L
marcksl1.S				gpc4.L
lrp10.S				acvr1.L
igf2bp3.S				tmsb4x.L
c6orf62.S				hnrnpa3.S
foxa1.S				mtfr1l.S
rnf26.L				arid3b.L
fam208a.S				fhdc1.L
eif3a.L				acads.L
LOC108704245				gpbp1l1.S
exo1.S				dhcr7.S
arih1.L				slc25a28
sri				znf516.L
slx4.L				yeats4.L
mtf2.L				cdon.L
agpat3.S				rps29
ubap2l.L				marcksl1.S
xpr1.L				lrp10.S
siah1.S				igf2bp3.S
rps20.L				c6orf62.S
ddit4.L				foxa1.S
psma5.L				rnf26.L
rbm5.L				fam208a.S
lbr.S				eif3a.L
znf668.L				LOC108704245
hunk.L				exo1.S
slbp.S				arih1.L
timm23				sri
sppl3.L				slx4.L
tiprl.S				mtf2.L
rbm4b.L				agpat3.S
rab40b.L				ubap2l.L
ticrr.L				xpr1.L
emd.S				siah1.S
fus.L				rps20.L
ppp1r16a				ddit4.L
rps10				psma5.L
kmt2d.L				rbm5.L
bivm.L				lbr.S
incenp.L				znf668.L
gltscr1.S				hunk.L
gsk3a.S				slbp.S
paxip1.L				timm23
cyfip1.L				sppl3.L
top2b.S				tiprl.S
ddx6.S				rbm4b.L
gltscr1.L				rab40b.L
dyrk3.S				ticrr.L
tdrkh.L				emd.S
kdm5b.S				fus.L
ubap2.L				ppp1r16a
sgol1.L				rps10
lypla1.S				kmt2d.L
kat6a.S				bivm.L
acsl1.S				incenp.L
kdm5b				gltscr1.S
ppig.L				gsk3a.S
fam193a.S				paxip1.L
hnrnpk.S				cyfip1.L
hnrnpll				top2b.S
ctbp2l.L				eif4g3
kifc3.L				ddx6.S
myef2.S				gltscr1.L
mknk2.L				dyrk3.S
ilf3.L				tdrkh.L
ralb				kdm5b.S
cdon.S				ubap2.L
LOC108714722				sgol1.L
tnk2l.L				lypla1.S
rps3.L				kat6a.S
safb.L				acsl1.S
gnb2l1				kdm5b
prrc2b.L				ppig.L
fkbp1a.S				fam193a.S
sp1.L				hnrnpk.S
srrt.L				hnrnpll
hmgn3.S				ctbp2l.L
cxadr.L				kifc3.L
cst3.S				myef2.S
nsa2.L				mknk2.L
ube2s.S				ilf3.L
rps15.S				ralb
fnbp1l.L				cdon.S
rpl38.S				LOC108714722
pabpc1.S				tnk2l.L
gltscr2.L				rps3.L
tcf12.S				safb.L
sec13.S				gnb2l1
cnot1.L				prrc2b.L
kat8.L				fkbp1a.S
rbms2.S				sp1.L
arfrp1.L				srrt.L
sfpq.S				hmgn3.S
hnrnpu.S				cxadr.L
cgn.L				cst3.S
wiz.S				nsa2.L
ilf2.L				ube2s.S
rbm4b.S				rps15.S
pcca.L				fnbp1l.L
psmc5.L				rpl38.S
efs.S				pabpc1.S
cbx5.L				gltscr2.L
zbed4.L				tcf12.S
srsf4.L				sec13.S
ubb.S				cnot1.L
capzb.L				kat8.L
MGC53694				rbms2.S
snrnp200.S				arfrp1.L
smarce1.S				sfpq.S
cdk2.L				hnrnpu.S
h3-3b				cgn.L
snrpf.S				wiz.S
nfrkb.L				ilf2.L
vangl2.L				rbm4b.S
casp8ap2				pcca.L
mthfd2.L				psmc5.L
glul.S				efs.S
npm1.L				cbx5.L
fxr1.S				zbed4.L
nucks1.L				srsf4.L
glul.L				ubb.S
hnrnpm.L				capzb.L
mybl2.S				MGC53694
ddias				snrnp200.S
kiaa0907.L				smarce1.S
sf3b2.S				cdk2.L
hmgn3.L				h3-3b
ywhab.S				snrpf.S
rbm33.S				nfrkb.L
anp32e.L				vangl2.L
rbm8a.L				casp8ap2
rpl6.S				mthfd2.L
svip.S				glul.S
anxa7.L				npm1.L
u2af2.S				fxr1.S
ubc.L				nucks1.L
wasf2.L				glul.L
odc1.L				map4k4-like.L
n4bp2.L				hnrnpm.L
fbl.L				mybl2.S
rac1.L				ddias
cpsf6.S				kiaa0907.L
pabpc1.L				sf3b2.S
ctbp2.S				hmgn3.L
tpm4.L				ywhab.S
kif22.S				rbm33.S
rae1.S				anp32e.L
wapl.L				rbm8a.L
tpx2.L				rpl6.S
sec24a.L				svip.S
kiaa0430.S				anxa7.L
zcchc8.L				u2af2.S
pi4kb.L				ubc.L
atxn2l.S				wasf2.L
jmjd6.S				odc1.L
sbno1.S				n4bp2.L
gpatch4.L				fbl.L
phf3.L				rac1.L
kif20a.S				cpsf6.S
sucla2.L				pabpc1.L
rbm26.S				ctbp2.S
ilvbl.L				tpm4.L
gna14.L
MGC131268
tmem33.L
napa.S
snx5.S
pum2.L
ammecr1.S
pdcd10.S
arfgef1
ehmt1.S
nol9.L
pphln1.S
nras.L
rpa3.L
kpna3.L
nampt.L
top3b.L
exoc5.L
dusp11.S
fam98b.L
tk2.S
LOC100653495
cttn
dgcr8
stk11ip.L
tbc1d4.L
map7d2.S
loc733209.L
c18orf25.L
nedd1.L
pkd1l1.L
usp24.L
pacsin2.L
fzd8.L
myof.1.L
tmem110.S
hook2.L
atg2b.L
eya3.L
ppp3ca.L
nacc1.L
avl9.L
trhd.S
znf239
polr2i.L
cct6a.S
wdr26.L
pou5f3.2.L
adnp.S
ddx3x.L
rad54l2.L
ube2k.S
stxbp3.L
tjp1.S
edrf1.S
micu1.S
dhx37.L
nf2.S
lrrc1.L
ccnt2.S
tnpo1.L
ptgfrn.S
csnk1g1.L
ythdf3.L
ptprf.S
rabl6
chaf1a.S
spata2l.L
aldh3b1.L
fscn1.S
ctf1
plin2.S
hmg20b.S
dnaja4.1.L
zbtb49.L
zdhhc5.L
irf6.2.S
pop1-like.L
shkbp1.L
mettl9.L
dpy19l1.L
socs5.L
lman2.S
irak1.L
zcrb1.L
cpd.L
knstrn.L
tll2.L
nfkbia.L
thoc7
hif1an.S
triap1.L
chd7.L
ganab
slc31a2.S
eef1akmt3.L
zhx2
sec24d.S
shcbp1.L
scoc.S
cdv3.L
cep164.L
cchcr1.L
uprt.L
fam122a.L
ccne1.S
wdr82.L
fam26d.L
iqgap1
zfand6.L
tstd2.S
atp2c1
golga2.S
lrrk1.L
ift122.L
sbf1.S
ocrl.L
nnt.S
atxn2.S
alg10.S
fam91a1.L
neil3.L
btaf1.L
gpatch11.L
aldh7a1.S
ppp1r9a.S
brwd3.L
pomgnt1.S
stag1.L
man2a1.S
c18orf8.L
c12orf49.L
med26.L
utrn.L
ryk.S
phf3.S
atp2b1.S
npm3.S
pum2.S
MGC83673
tgif1.L
atp9a
nkrf.L
MGC80416
mgat4a.S
dnal4.S
map4k5
ercc8.S
mios.L
shprh.S
tnfaip1.L
bod1l1
magi1.S
ctbp1.S
ubac2.L
gipc2.S
bptf.S
cdc23.S
snx17
gpatch2.L
raver2.L
lonrf2.L
ccar1.L
sin3a.L
cand1.S
pik3c3.S
znf639.S
yrdc.L
Xelaev18042112m
fzd7.L
gnl1.S
mast3
snx31.L
ccdc34.S
MGC97820.L
ptp4a3.S
trmt12.L
zmym2.S
picalm.L
dusp11.L
slc39a7.L
ncln.S
heatr5b.L
nkap.L
Xelaev18009838m
caap1.L
samd4b.S
tsc22d1.L
dapk3.L
elavl2.L
mllt1.S
ccpg1.L
lrch3.S
pkp4.S
sap130.L
traf7.S
ykt6.L
dmtf1.S
tmem185a.L
enpp6.L
znf395.L
nusap1.S
mllt1.L
mrpl54.S
slc35a4.S
samd4a.L
golgb1
ube2r2.L
gramd1c.S
slc39a9.L
zfyve16.S
pja2.L
gapvd1.S
vars2.L
wdr44.S
rnf126.L
slc35e1.L
acsl4.L
nsun7.S
gdf9.S
birc5.2.S
rhbdd2.L
polr1d.2.L
cxcr4.L
adam10
mat2b.L
camsap3.L
LOC108718301
arhgdia.L
cdc16.L
arf6.S
fancb.L
taf9b.L
kmt2d.S
atxn2.L
camkk2.S
scaf8.S
vps13a.L
cul2.L
usp16.L
kpna1.L
suco.L
cdc45.L
cisd1.L
ipo9.L
flna
slc1a5.L
dapk3.S
fam222b.L
znf407.L
kif16b
cnep1r1.L
tax1bp1.L
fbxo34.S
kif22.L
ddx56.S
txn2.S
luzp1.S
cab39l.L
nup35.S
spry1.S
abl2.L
chfr.L
rad17.L
dnajb1.L
arl2bp.L
ccz1b.L
dnaaf1.S
trim33.S
irf5.L
myo1c.S
slc30a2.L
golga4.L
gatad1.L
rnf121.L
ppip5k2.L
tmem45b.S
marveld2.S
dnajc16.S
ccdc61.L
golph3l.L
csnk1e.L
gclc.L
cep68.L
qrich1.2.S
stim2
gltp.S
b3gnt5.L
hic2.S
eed.L
tmed9.S
larp4.S
exoc2.L
cpsf4.S
luzp1.L
zhx3.S
btrc.L
nol12.S
xtm4
yod1.L
dennd4a.L
ptcd2.L
kiaa0196.S
n4bp1.S
limch1.L
rps6kc1.L
bloc1s6.S
hnrnpll.S
tmem115.S
cul4b.S
chd8.S
efr3a.L
fkbp4.L
znf577.L
trmt13.L
nploc4.L
emsy.S
idh3a.S
ctnnbip1.L
tbc1d12.S
ppp4r3b.L
id2.S
lrrc42.L
ifi30.S
snap91.S
got2.L
prkar2a.L
hmgxb3.L
oaf.S
cc2d2a.L
h6pd.S
sdf2l1.L
rexo1.L
pld2.L
ints2.S
lnx2
glmn.L
ccdc68.S
bsg.S
pxn.S
rhog-like.1.S
keap1.S
LOC108700229
pikfyve.L
abi1.L
poldip2.S
clec16a.S
rap1a.L
st3gal3.S
ubap1.S
cdkn2aip.L
rnf126.S
bix2.L
grk5.S
ubxn2a.L
naa30.L
rasal2.S
bri3bp.S
atg16l1.L
oxct1.L
wapl.S
sh3glb1.S
plekhf2.L
c11orf95.L
slc25a40.L
tmem178b
ipo13.L
lmbr1l.L
rhbdd3.L
otx2.L
LOC108695562
bmi1.L
otx2.S
tm9sf1.S
usp22 a
git2
ddx1.L
tmem62.S
foxn2.S
ranbp3.S
c11orf57.S
ppfia1.L
[truncated: 884 more rows]

## Sheet: St12-13
List of all genes from the venn diagrams of genes temporally differentially expressed in endoderm and mesoderm lineages corresponding with figure 5B
Total				Increase				Decrease
Endo Only	Meso Only	Overlap		Endo Only	Meso Only	Overlap		Endo Only	Meso Only	Overlap
Xelaev18042133m	hoxc4	ptpn20		Xelaev18042133m	hoxc4	ptpn20		tp53bp1.S	blzf1.S	ofd1.L
kcne1.L	wnt10a.L	frmpd2b		kcne1.L	wnt10a.L	frmpd2b		gpr107.L	psmd8.S	xrn1.L
LOC108705583	LOC108708640	LOC108700048		LOC108705583	LOC108708640	LOC108700048		ythdc1.L	cbx3.S	wdr44.L
spam1.L	hoxa5.S	fat2.S		spam1.L	hoxa5.S	fat2.S		dnm1l.S	mapk11.S	cul4b.S
hrg.L	sparc.L	lmo4.2.S		hrg.L	sparc.L	lmo4.2.S		dlgap5.S	pitrm1.L	gtf2e2.L
ppp1r1b.S	hoxc4.L	pcdh8l.L		ppp1r1b.S	hoxc4.L	pcdh8l.L		nsun2.S	cdc20.L	cdc123.S
LOC108700106	Xelaev18010427m	fgl2		LOC108700106	Xelaev18010427m	fgl2		nsrp1.L	sept2.L	pou5f3.2.L
Xetrov90020448m.S	hoxa7.S	tbx3.S		Xetrov90020448m.S	hoxa7.S	tbx3.S		supt6h.S	nabp2.L	ccnb1.2.L
igf2.L	hoxc6.L	LOC108701190		igf2.L	hoxc6.L	LOC108701190		dis3l2.S	cltb.S	psap.S
nt5e.L	hgf.S	Xelaev18037313m		nt5e.L	hgf.S	Xelaev18037313m		dnajb11.S	supt6h.L	rabep1.S
fam198a.S	xhoxc8	dlk2.S		fam198a.S	xhoxc8	tbx3.L		slc37a3.L	calm2.S	tuba4.S
LOC108698406	hoxc6.S	tbx3.L		LOC108698406	hoxc6.S	cacna1b.S		fyttd1.S	rnf112.L	scaf11.S
olig2.S	meox2.S	cacna1b.S		olig2.S	meox2.S	lrp4.S		ankrd11.L	gnai1.L	ptprk
eva1a.S	plod2.S	lrp4.S		eva1a.S	hoxc8.S	nhs.L		aqr.L	ccna2.L	ppm1d
ugt1a1.L	hoxd4.L	nhs.L		ugt1a1.L	plod2.S	gby.L		actr2.L	taf8.S	nomo3.S
cfi.S	pcdh8l.S	gby.L		cfi.S	hoxd4.L	nr6a1.L		skiv2l2.S	faf1.L	wls.S
tmem119.S	hoxa10.S	nr6a1.L		tmem119.S	pcdh8l.S	rab27a.S		prpf38a.S	tstd3.L	kiaa1109.L
cfi.L	atp13a-like.S	rab27a.S		cfi.L	hoxa10.S	hes8.S		cdca8.L	nup37.L	znf276.S
spib.L	hoxc5.L	hes8.S		spib.L	atp13a-like.S	klf3.L		cwf19l1.L	dsn1.L	phf14.L
Xetrov90020447m.S	slc9a5.L	klf3.L		Xetrov90020447m.S	hoxc5.L	tmem125.L		sirt5.L	calhm2.S	dnal4.L
myadml2	tuba1cl.1.L	tmem125.L		myadml2	slc9a5.L	st3gal4.L		rae1.S	clstn1	napa.S
Xelaev18002155m	Xelaev18000621m	st3gal4.L		Xelaev18002155m	tuba1cl.1.L	ets1.S		ap1g1.S	MGC82347	rngtt.S
LOC108707188	hoxa7.L	ets1.S		LOC108707188	Xelaev18000621m	foxf1.S		scp2	chmp6.S	lpp.L
hephl1.L	hoxb8	foxf1.S		hephl1.L	hoxa7.L	hoxd1.L		xpot.S	ap2m1.S	mob3a.L
klb.L	LOC108701747	hoxd1.L		klb.L	hoxb8	slc41a1		gpalpp1.L	mrps5.L	mon2.L
zc3h12c.L	hoxa10.L	slc41a1		zc3h12c.L	LOC108701747	mmel1.S		pip4k2a.S	mst1.L	arfgef1
loc100490316.L	hoxd4	mmel1.S		loc100490316.L	hoxa10.L	tril.L		smn2.L	ppp1r12c.L	vps35.S
celf3.S	hoxc9.S	tril.L		dlk2.S	hoxd4	LOC108714950		ppp4r3b.L	cldn6.2.S	cul3.S
Xelaev18005504m	spns2.S	LOC108714950		celf3.S	hoxc9.S	rassf10.L		mbtps1.L	wdr45b	cdr2.L
MGC82982	actc1.S	rassf10.L		Xelaev18005504m	spns2.S	LOC108709417		ppwd1.S	ddt.L	fig4.L
pak6.L	hoxa9.S	LOC108709417		MGC82982	actc1.S	val.L		mars	msi1.L	LOC108711198
Xelaev18029531m	dbndd1.L	val.L		pak6.L	hoxa9.S	axl.L		LOC108701277	gemin6.L	sirt4.L
cyp11a1.S	hoxb4.S	axl.L		Xelaev18029531m	dbndd1.L	gjb1.L		tsnax.S	cops2.L	vta1.S
Xelaev18041713m	cmahp.L	gjb1.L		cyp11a1.S	hoxb4.S	sod3.L		sec24d.S	tmc6.L	atp6v0c.L
lrit1.S	foxj1.2.S	sod3.L		Xelaev18041713m	cmahp.L	crabp2.S		mettl14.L	mtor.L	eif2b5.S
gfi1.L	hoxa9.L	crabp2.S		lrit1.S	foxj1.2.S	caskin2.L		nfyb.S	gtf2h3.L	znf407.L
kcng3-like.1.S	cyp26c1.S	caskin2.L		gfi1.L	hoxa9.L	lmo4.2.L		cdc40.S	larp1b.L	pan2.S
nt5e.S	otog.L	lmo4.2.L		kcng3-like.1.S	cyp26c1.S	ppl.L		brms1l.S	tpm1.L	gtf2a1.S
LOC108713294	hoxb5.S	ppl.L		nt5e.S	otog.L	b3gnt3.L		ept1.L	bag4.S	ykt6.S
LOC108696372	crnn	gprc5b.S		LOC108713294	hoxb5.S	phka2-like.S		sumo1.S	e2f7.L	znf182
pdzd3.L	hoxb7.S	b3gnt3.L		LOC108696372	crnn	mmp11.S		mdn1	zfat.L	cdc27.L
LOC108719843	mmp11.L	phka2-like.S		pdzd3.L	hoxb7.S	ncam1.L		erlec1.S	myh10.S	odc1.S
Xelaev18026948m	hoxb1.S	mmp11.S		LOC108719843	mmp11.L	adcy9.L		lsm6.S	gkap1.L	MGC81630
col13a1.S	hoxa6	ncam1.L		Xelaev18026948m	hoxb1.S	ribc1		pum2.L	map2k1.L	smap1.L
loc108705532.L	LOC100127337	adcy9.L		col13a1.S	hoxa6	bmp3.L		snrnp48.L	rnd1.S	txlng.L
ppp1r15a.S	foxj1.2.L	ribc1		loc108705532.L	LOC100127337	capn8.1.S		zc3h18.S	plaa.S	MGC97820.L
wnt11.L	loc100158267.L	bmp3.L		ppp1r15a.S	foxj1.2.L	gnb3.S		lrrfip2.L	gprc5c.S	herc4.L
ventx3.2.L	hoxc9.L	capn8.1.S		wnt11.L	loc100158267.L	sytl2		hectd3.L	ubqln1.S	nelfb.L
cpxm1.L	tuba1cl.2.L	gnb3.S		ventx3.2.L	hoxc9.L	tanc2.L		dapk3.S	vgll4l.S	naf1.L
Xelaev18045499m	LOC108719498	sytl2		cpxm1.L	tuba1cl.2.L	tacr1		nob1.S	shcbp1.S	atp6v1h.L
LOC108700044	LOC108697577	tanc2.L		Xelaev18045499m	LOC108719498	fign.L		jmjd6.S	vps4b.S	rnf14.5.L
rin2.S	klf4.S	tacr1		LOC108700044	LOC108697577	notum.S		zpr1.L	c19orf43.L	clpx.L
fgf10.L	Xelaev18032572m	fign.L		rin2.S	klf4.S	atp8b2-like.L		vps26a.L	hsf2.2.L	pou5f3.2.S
slco2b1.S	robo2	notum.S		fgf10.L	Xelaev18032572m	dusp8.S		cttnbp2.L	LOC108719050	metap1.L
LOC108719071	pm20d1.L	atp8b2-like.L		slco2b1.S	robo2	rab3d.L		csnk1g3.L	sdcbp.S	fbxl5
phka2-like.L	wnt5a.S	dusp8.S		LOC108719071	pm20d1.L	rxra.S		mapk8.L	mrpl44.S	wdtc1.L
Xelaev18004102m	kcnj2.L	rab3d.L		phka2-like.L	wnt5a.S	gpd1.L		csnk1g1.S	ifi30.L	cand1.L
dlc.L	b4galt4.L	rxra.S		Xelaev18004102m	kcnj2.L	syt1		pcmt1.L	ube2d1.S	kiaa1033.L
ccn1l.S	ccdc136	gpd1.L		dlc.L	b4galt4.L	tbx2.L		iqch.L	msh3.L	flna
klf8	slc3a2.L	syt1		ccn1l.S	ccdc136	tuft1.S		zhx3.L	eml4.S	gpa33.S
nkx2-1	arhgef37.S	tbx2.L		klf8	slc3a2.L	LOC108715566		gpatch11.L	hax1.L	g6pd.S
b3galt1.L	liph.L	tuft1.S		nkx2-1	arhgef37.S	cyp1c1.L		npm3.S	tyms.L	MGC68662
LOC108700108	tgfb1.L	LOC108715566		b3galt1.L	liph.L	arid3a		sdf2l1.S	ptpn2.S	snx2.S
emilin1.L	capn9.S	cyp1c1.L		LOC108700108	tgfb1.L	LOC108710818		lin9.L	acly.L	rpp38.S
fetub.L	hoxb3.S	arid3a		emilin1.L	capn9.S	atp11c.L		txlna.L	LOC100497184.L	Xelaev18017238m
ppargc1b.S	Xelaev18000499m	LOC108710818		fetub.L	hoxb3.S	elf1.S		ammecr1.S	eif4e	bora.S
svop.L	pmp22.L	atp11c.L		ppargc1b.S	Xelaev18000499m	robo1.L		ventx2.1.L	cst7.L	eps8.L
LOC108700001	thbs2.L	elf1.S		svop.L	pmp22.L	nr6a1.S		carnmt1	cdca8.S	nphp1.L
LOC108709924	MGC53587	gprc5c.L		LOC108700001	thbs2.L	flt3lg.S		cox11.L	enkd1.L	ilvbl.L
tgfbi.L	fign.S	robo1.L		LOC108709924	MGC53587	loc548390.S		stk26.S	cldn6.1.L	otulin.S
MGC154492	scn5a	nr6a1.S		tgfbi.L	fign.S	ppl.S		LOC108704265	dscc1.L	hira.L
ripply2.L	kif26a.L	flt3lg.S		MGC154492	scn5a	fmnl2		rnf121.L	ccne2.L	dennd4c.L
slco1b3.S	kdelr3.S	loc548390.S		ripply2.L	kif26a.L	tenm4		sh3glb1.L	uba6.L	sgta.L
abtb2.S	ttc24.L	ppl.S		slco1b3.S	kdelr3.S	LOC108709394		sri.L	ilkap.L	cnih4.S
klb.S	kiaa1217.L	fmnl2		abtb2.S	ttc24.L	sspo		chordc1.S	wbp2nl.S	reps1.L
Xelaev18000356m	sp5.S	tenm4		klb.S	kiaa1217.L	map2k6.L		scaf8.S	cops2.S	cul9.L
c6.2.L	basp1.S	LOC108709394		Xelaev18000356m	sp5.S	ppp1r3c.1.L		rexo5.S	fxr1.L	haus1.L
shroom3	MGC75872.L	sspo		c6.2.L	basp1.S	slc9a3r2.S		tmem33.L	ermp1.L	blnk.S
Xelaev18011469m	itln1.L	map2k6.L		shroom3	MGC75872.L	ptprd.L		srp68.S	ube2d4.S	atp6v1a.S
LOC108709534	rapgef3	ppp1r3c.1.L		Xelaev18011469m	itln1.L	vill.L		stk11ip.L	bmp1.S	dbr1.L
Xelaev18036101m	ndnfl1.1.L	admp2.L		LOC108709534	rapgef3	agrn		got2.S	vps11.S	dnal4.S
LOC108719358	hoxb9.S	slc9a3r2.S		Xelaev18036101m	ndnfl1.1.L	pik3r1.S		hbs1l.L	dctd.L	stag1.L
prrx2.L	gbx2.1.L	ptprd.L		LOC108719358	hoxb9.S	kiaa1217.S		nol12.S	atp6v1g1.L	nxn.S
fcho1.L	gbx2.2.L	vill.L		prrx2.L	gbx2.1.L	atf7ip.S		txnl1.S	papss1.L	eps15l1.L
gdf6.S	wnt5a.L	agrn		fcho1.L	gbx2.2.L	grhl2.L		cdv3.L	ipo9.S	cat.2.S
ripply3.L	tmem184a.L	pik3r1.S		gdf6.S	wnt5a.L	syt16.L		c1orf52.S	gnb4.L	ppp3ca.S
rgs20.S	ugt8.S	kiaa1217.S		ripply3.L	tmem184a.L	LOC108712697		serp2.L	papss1.S	ergic1.L
vepp1.L	arhgef26.L	atf7ip.S		rgs20.S	ugt8.S	mid1ip1.S		n4bp1.L	c15orf39.L	dock5.L
slc10a1.L	plxna2.S	grhl2.L		vepp1.L	arhgef26.L	tusc2.S		golga2.S	vps29.S	utrn-like.2.S
mgat3.L	loc100489456.L	syt16.L		slc10a1.L	plxna2.S	rdd4.L		arfgap1.L	MGC147242.L	ctdp1.L
syt9.L	myf5.L	LOC108712697		mgat3.L	loc100489456.L	fbxw9.S		sec24a.L	chtf18.L	snx14.L
blvra.L	LOC108718065	mid1ip1.S		syt9.L	myf5.L	dab2ip-like.L		gmnn.S	exoc4.L	mdc1.L
msx2.S	galnt12.L	tusc2.S		blvra.L	LOC108718065	casz1.S		nlk.2.S	ccnb2.L	pkmyt1.S
Xelaev18004391m	ndnf.S	rdd4.L		msx2.S	galnt12.L	sdhb.S		cdc16.L	g2e3.L	atp6v0b.S
hipk2.S	bean1.L	fbxw9.S		Xelaev18004391m	ndnf.S	dll1.L		lmnb3.L	ptdss1.S	nup88.L
hnf1b.L	dse.S	dab2ip-like.L		hipk2.S	bean1.L	emp2.L		spcs3.S	gtpbp1.L	cul1.S
LOC100135146.S	tuba1a	casz1.S		hnf1b.L	dse.S	atp13a4.L		atad2b.L	ap1m1.S	galc.L
chst6.L	slc16a9.S	sdhb.S		LOC100135146.S	tuba1a	prex1.L		tsr3.L	ap3b1.L	lrrc1.L
bco1.L	lrat.L	aifm3.L		chst6.L	slc16a9.S	lhfpl2.S		vps8	fkbp8.L	pitpnb.2.L
asic2	fam155b	dll1.L		bco1.L	lrat.L	cd99l2.S		cdc37.S	blmh.L	ppp2cb.L
abtb2.L	polrmt	emp2.L		asic2	fam155b	slc16a6.S		pex19.L	ankrd28	cd55
eng	tecta.1.L	atp13a4.L		abtb2.L	polrmt	niban2		cdv3.S	LOC108714266	arfip1.L
ndrg1.S	sostdc1-b	prex1.L		eng	tecta.1.L	nav1.L		rhbdd2.L	pola2.L	nrbp1.L
adamts18.S	cat1.L	lhfpl2.S		ndrg1.S	sostdc1-b	gpr160.L		tbc1d4.L	sde2.L	lca5.L
sept5.L	LOC108704135	cd99l2.S		adamts18.S	cat1.L	vwf		pygm.S	znf239	tpx2.S
celf3.L	lrrc31	slc16a6.S		sept5.L	LOC108704135	spata5l1.L		taf2.S	memo1.S	cdk5rap2.L
wnt5b.L	sytl5.L	niban2		celf3.L	lrrc31	fign		ap1b1.S	kti12.L	dhps.S
s1pr3.S	nr1d1.L	nav1.L		wnt5b.L	sytl5.L	sgms1.L		best2.L	elovl5.L	slc35b3
gli2.S	sytl1.L	gpr160.L		s1pr3.S	nr1d1.L	gatm.S		bud31.S	hdac8.L	ric8a.L
znf750.S	plxna2.L	vwf		gli2.S	sytl1.L	vangl1.L		amd1.S	mpst.L	rab5a.S
frrs1.S	itpr3	spata5l1.L		znf750.S	plxna2.L	sntb2.L		pdcd6.L	iqgap2.L	trappc11.L
tril.S	tcaf1.L	fign		frrs1.S	itpr3	nav2.S		eny2.L	ero1a.L	c20orf194.L
exoc3l2.L	MGC52899	sgms1.L		tril.S	tcaf1.L	rcor2		fam114a1.L	cdipt.L	rmdn3.L
cemip.S	tox.L	gatm.S		exoc3l2.L	MGC52899	ptprd.S		kif2c.L	taok1.S	ntan1.L
eya2	kitlg	vangl1.L		cemip.S	tox.L	lamb1.L		slc44a1.L	kif13b.L	dck.1.L
slit2.S	tp63.S	sntb2.L		eya2	kitlg	epha3		mettl9.S	sde2.S	spg7.L
c2cd4c	zc3h12a.L	nav2.S		slit2.S	tp63.S	disp1.L		golga4.L	mrpl3.S	ccne1.S
ttll7.S	atp12a.L	rcor2		c2cd4c	zc3h12a.L	Xelaev18039917m		nsdhl.L	atp11b.L	myo5a.S
ca8.S	mcidas	ptprd.S		ttll7.S	atp12a.L	tanc2		rpusd3.S	ppp6r3.L	pigk.S
sp4.S	mef2c.S	lamb1.L		ca8.S	mcidas	adam9		akirin1.S	rprd1b.L	opa1.L
dbx1.L	loc100145533.S	epha3		sp4.S	mef2c.S	comt.2.S		timm22.S	txndc5.S	anapc4.L
rbm24.L	slc35a3.1.L	disp1.L		dbx1.L	loc100145533.S	dst		exosc10.L	vamp1.L	tmx2.L
cdx4.S	fut2.L	Xelaev18039917m		rbm24.L	slc35a3.1.L	lrpprc.S		srbd1.L	ube2k.S	pds5a.S
Xelaev18003555m	lpar3.S	sspo.L		cdx4.S	fut2.L	ahnak.L		fam110c.S	MGC68458	tmem33.S
gnaz.L	spata18-like.L	tanc2		Xelaev18003555m	lpar3.S	uhrf2.S		usp16.L	nup88.S	dda1.L
Xelaev18003004m	dlx2.L	adam9		gnaz.L	spata18-like.L	Xelaev18022564m		fam160b1.S	MGC83206	arhgap10.L
sema3f-like.1.L	hes8.L	comt.2.S		Xelaev18003004m	dlx2.L	foxn4.L		rps6ka1.S	wash1.L	cdkal1.S
Xelaev18025448m	LOC108707893	dst		sema3f-like.1.L	hes8.L	kcnj15.L		gnl1.L	stxbp3.S	map7d2.S
ntrk1.S	hoxa11.L	lrpprc.S		Xelaev18025448m	LOC108707893	znf644.L		rab5a.L	tmem79.S	fscn1.S
slc17a7.S	wdr86.L	ahnak.L		ntrk1.S	hoxa11.L	tab2.S		shcbp1.L	os9.S	mkrn3.L
adamtsl4.L	scel.L	gprc5c.S		slc17a7.S	wdr86.L	slc30a8.L		exd3.L	tpp2.S	loc100493771.L
wnt8b.S	Xelaev18003892m	uhrf2.S		adamtsl4.L	scel.L	zbed1.L		wdr36.L	pkp3.L	kiaa0226l.L
egflam.S	galnt5.L	Xelaev18022564m		wnt8b.S	Xelaev18003892m	fam3b.L		osr2.S	slc27a6.L	arih2.S
sstr2	krt80.S	foxn4.L		egflam.S	galnt5.L	aldh1l1.L		gnl1.S	gramd4.S	nsmaf.L
ccl19.S	crb2.S	kcnj15.L		sstr2	krt80.S	fam53a.L		LOC108718073	mycl.L	cyp17a1.L
crtap.S	fkbp9.S	znf644.L		ccl19.S	crb2.S	fzd10.S		tcf7l1.S	akap8l.L	cul1.L
Xelaev18003553m	sfrp1.L	tab2.S		crtap.S	fkbp9.S	rnf149.S		ybx2.L	gm15246	tgfbr1.S
scube1.S	tnfaip8l2.S	traf4.S		Xelaev18003553m	sfrp1.L	tmem238		zcrb1.L	nabp2.S	sh3bp1.L
wnt5b.S	cald1	slc30a8.L		scube1.S	tnfaip8l2.S	prpsap1.S		camk1.L	l3mbtl3.S	h1foo.S
htr1d.S	scn3b.L	zbed1.L		wnt5b.S	cald1	dgkk.L		tmem131.L	4930579g24rik	dppa2/4.1.L
ror1.L	gsg1.S	fam3b.L		htr1d.S	scn3b.L	cebpd.L		grinl1a.S	notum.L	hs2st1.L
mzt2b.S	elf3.S	aldh1l1.L		ror1.L	tnfrsf19.L	Xetrov90014299m.L		cadps2	pigt.L	cand1.S
LOC108700038	slc35b4.L	fam53a.L		mzt2b.S	gsg1.S	kazn.S		tmem263.L	chfr.L	irf5.L
igf2.S	Xelaev18002015m	fzd10.S		LOC108700038	elf3.S	sp7.S		dut.S	eml1	mreg.S
fam181b.L	mgc147226.S	rnf149.S		igf2.S	slc35b4.L	nfe2l1.L		kpna6.S	cdk9.L	mon2.S
fam20c.L	Xelaev18042791m	tmem238		fam181b.L	Xelaev18002015m	znf229.L		csnk1g1.L	ykt6.L	mettl3.L
slc47a2.S	capn8-like.L.L	prpsap1.S		fam20c.L	mgc147226.S	sgpp1.L		otub1.L	cab39l.S	agtpbp1.L
ventx3.2.S	tshz1.L	dgkk.L		slc47a2.S	Xelaev18042791m	mdk.S		epha4.L	mrpl53.L	g6pd.L
il12rb2	axin2.S	c15orf39.S		ventx3.2.S	capn8-like.L.L	h2afy2.L		zcchc10.S	ercc2.L	tspan31.S
Xelaev18000343m	lmln	cebpd.L		il12rb2	tshz1.L	ppp1r1a.S		nampt.L	MGC86492.S	eps8.S
MGC154351	mgat4c	Xetrov90014299m.L		Xelaev18000343m	axin2.S	fkbp9.L		arfgap2.L	tom1l1.L	itch.S
cacnb2.L	gli3.S	kazn.S		MGC154351	lmln	mboat1.L		galnt2.L	smtn.S	lclat1.L
pmp22.S	tlrs5	sp7.S		cacnb2.L	mgat4c	rhof.L		wdr18.S	ppa1.S	loc734029.L
insm1.L	aim1.S	nfe2l1.L		gprc5b.S	gli3.S	rab15.L		eya3.L	atg2b.S	myo5a.L
Xelaev18035109m	hkdc1.S	znf229.L		pmp22.S	tlrs5	bmper.L		entpd7.L	rpusd2.L	ttc13.S
stk17a	vgll1.L	sgpp1.L		insm1.L	aim1.S	cdh26.S		drosha.L	uchl1.L	gcfc2.S
kalrn.L	eps8l2.L	mdk.S		Xelaev18035109m	hkdc1.S	tll1.S		atp6v0c.S	sgta.S	acbd5.L
Xelaev18000408m	tmem173.S	h2afy2.L		stk17a	vgll1.L	rnf44.S		maats1	acot11	nsun7.S
foxp2.S	LOC100145533.L	ppp1r1a.S		kalrn.L	eps8l2.L	znf462.L		sucla2.S	emc3.L	c7orf60.S
itga4.S	LOC108719743	fkbp9.L		Xelaev18000408m	tmem173.S	slc2a2.S		tpr.S	rb1.S	sycp2l.L
masp1/3a	zfpl1.S	mboat1.L		foxp2.S	casd1.L	spin1.S		bckdk.S	ctf1	LOC100158299
tnfaip3.S	cdx1.L	rhof.L		itga4.S	LOC100145533.L	samd15.L		LOC108711265	sycp2l.S	dcaf10.S
kbtbd11.L	mrpl46.S	rab15.L		masp1/3a	LOC108719743	znf644.S		lsm12.L	fam171a1.L	ccdc9.S
Xelaev18005230m	stmnd1.L	bmper.L		tnfaip3.S	zfpl1.S	clock.S		yod1.L	ubxn8.L	dph5.S
clcn1	gck.L	cdh26.S		kbtbd11.L	cdx1.L	qser1.S		ssbp3.L	parvb.S	ap3d1.L
heca.L	nipal2.S	tll1.S		Xelaev18005230m	mrpl46.S	foxf1.L		pitpna.L	uhrf1.S	lrp1.L
capn13.S	nefm.L	rnf44.S		clcn1	stmnd1.L	Xelaev18006569m		mfap3.S	mrpl42.S	ciao3.S
LOC108707266	flt1.L	znf462.L		heca.L	gck.L	tab2.L		LOC108700186	kdsr.L	kif15.L
ldlrad3.S	fcgbp	slc2a2.S		capn13.S	nipal2.S	plod2.L		tstd2.L	rnf182	pafah1b2.L
eps8l3.S	cish.L	spin1.S		LOC108707266	nefm.L	nlrx1.L		brwd3.L	xpr1.L	aprt
pax5	wfikkn1.L	samd15.L		ldlrad3.S	flt1.L	zbtb14.L		gtf3c6.L	nrxn3	bak1.L
id2.L	ggact.L	znf644.S		eps8l3.S	fcgbp	acvr2b.L		gna14.L	ccdc93.L	cox19.S
slc7a7.S	galnt5.S	clock.S		pax5	cish.L	galnt7.L		cast.S	pdhb.L	ccdc68.S
LOC108703573	agr2.S	qser1.S		id2.L	wfikkn1.L	aim1l.L		btrc.L	faf1.S	rbbp5.S
c3orf70.L	LOC108699846	foxf1.L		slc7a7.S	ggact.L	slc45a3.S		tp53rk.L	arhgap1.S	ppp1cc.L
gdap1l1.L	robo3.S	Xelaev18006569m		LOC108703573	galnt5.S	Xelaev18035430m		znf608	alas1.S	apba3.L
nrl.S	c6orf132	tab2.L		c3orf70.L	agr2.S	Xelaev18038622m		kiaa1671	snx31.S	cdc23.L
c2.L	tnc	plod2.L		gdap1l1.L	LOC108699846	zfyve28-like.2.S		ppp6r3.S	cdc25c.S	kctd6.L
axin2	tuba1a.S	nlrx1.L		nrl.S	robo3.S	zbtb11.L		txlng.S	tbc1d9b	wbp4.L
LOC100135146.L	krt12.L	zbtb14.L		c2.L	c6orf132	slc30a7.L		srsf5.S	xiap.L	smagp.S
ror1.S	anos1.L	acvr2b.L		axin2	tnc	ccdc71l.L		ift57.S	atp2b1.L	pole2.L
nfatc1.S	LOC108718814	galnt7.L		LOC100135146.L	tuba1a.S	gli2.L		kiaa1210.L	cluap1.L	vamp8.L
Xetrov90004347m.L	kmt2c.L	aim1l.L		ror1.S	krt12.L	uspl1-like.L		slc2a10.S	znf395.S	nomo3.L
insm1.S	fucolectin.S	slc45a3.S		nfatc1.S	anos1.L	bmp4.L		cuedc1.S	kif15.S	syap1.L
avpr1a.S	bcat1.L	Xelaev18035430m		Xetrov90004347m.L	LOC108718814	gnb3.L		nup54.L	kdm3b.S	znf605.L
cga.L	hid1.L	Xelaev18038622m		insm1.S	kmt2c.L	arl6ip1.S		pja2.S	mfsd11.L	carnmt1.S
drgx.L	sh3d21.S	zfyve28-like.2.S		avpr1a.S	fucolectin.S	ccm2.S		coro1c.S	dym.L	opa1.S
Xelaev18016122m	Xelaev18029603m	zbtb11.L		cga.L	bcat1.L	kit.L		golim4.L	usp38.S	zp3.S
fzd6.L	krt16.L	slc30a7.L		drgx.L	hid1.L	ephb2.S		pi4kb.S	atg16l1.S	hmbs.L
lrfn5.L	adgrf1.L	ccdc71l.L		Xelaev18016122m	sh3d21.S	sephs1.S		dnaaf5.L	dnajc15.L	dync1li1.S
vwa2.L	pcdh18.L	gli2.L		fzd6.L	Xelaev18029603m	cblb.L		raf1.S	rhov.L	ldlrap1.S
c3.L	LOC108705956	uspl1-like.L		lrfn5.L	krt16.L	sun1.S		snip1.S	strn.S	ipo13.L
b4galt4.S	cog1.S	bmp4.L		vwa2.L	adgrf1.L	LOC108704569		zcchc6.L	pla2g12a.S	arhgef10.L
ptprc.L	hes3.3.L	gnb3.L		c3.L	pcdh18.L	cfh.L		arhgef2.L	hexb	acat2.L
rnf144b.L	rnf43.S	arl6ip1.S		b4galt4.S	LOC108705956	dgkd-like.L		tsc22d2.S	rassf7.L	prkaca.L
otop2.L	cyr61.L	ccm2.S		ptprc.L	cog1.S	LOC108718667		fam98b.L	ide.L	caap1.L
bcam.L	bmpr2.S	kit.L		rnf144b.L	hes3.3.L	jade1.L		cycs.L	gatsl2.L	ankrd13a.S
rbm47.L	znf534.L	ephb2.S		otop2.L	rnf43.S	caskin2.S		pdzd8.S	ipo9.L	spc25.L
atp13a5.L	xpo4.S	sephs1.S		bcam.L	cyr61.L	usp12.S		pawr.S	tbc1d10a.L	rnpepl1.S
nyap2	ptk2b.S	cblb.L		rbm47.L	bmpr2.S	irf2bpl.L		ifrd2.L	usp3.S	parg.L
LOC108717906	LOC108698731	sun1.S		atp13a5.L	znf534.L	mfge8.L		zcchc8.L	mob4.L	LOC496342
rasgef1b.S	inf2	LOC108704569		nyap2	xpo4.S	itpkb		prrg4.S	rhot2.L	cgnl1.L
relt.L	kirrel1	cfh.L		LOC108717906	ptk2b.S	Xelaev18043419m		gna14.S	f2rl1.S	tmem161a.L
dleu7	flrt2.S	dgkd-like.L		rasgef1b.S	LOC108698731	nuak1.L		parp2.L	mnat1.L	pgk1.L
foxi4.2.L	lypd6b.L	LOC108718667		relt.L	inf2	slc45a3.L		atp5b.L	vwa8.L	lrrc27.L
dcx.L	stoml1.L	jade1.L		dleu7	kirrel1	LOC108703993		dnah9.S	eps15l1.S	pacsin2.L
c8g.S	tm2d3.L	caskin2.S		foxi4.2.L	flrt2.S	dspp		cct5b	haus5.L	aldh3b1.L
ncam1.S	b4galnt3.S	dnmbp.L		dcx.L	lypd6b.L	LOC108713029		gna11.L	naa50.L	edc4.L
Xelaev18034274m	atp13a-like.L	usp12.S		c8g.S	stoml1.L	slc25a1.L		cyb5b.L	ern1.S	cdca7l.L
vipr1.S	vill.S	irf2bpl.L		ncam1.S	tm2d3.L	zfc3h1		acsl3.S	fcho2.S	mtmr12.L
elf1.L	ly6e	mfge8.L		Xelaev18034274m	b4galnt3.S	phf21b		ppp6r1.L	LOC495950	ube2g1.S
mttp	casd1.S	itpkb		vipr1.S	atp13a-like.L	endod1.L		pm20d2.L	st6galnac2.L	cyct.L
Xelaev18031009m	myo1e	Xelaev18043419m		elf1.L	vill.S	eif4g1.L		dennd2c.S	gtsf1.L	ppm1b.L
twsg1.S	nceh1.L	nuak1.L		mttp	ly6e	mcm5.S		naa30.L	tdrd5.L	col4a3bp.S
slc4a4.S	kit.S	slc45a3.L		Xelaev18031009m	casd1.S	Xelaev18023478m		suco.S	LOC108719787	LOC108696874
ero1b.L	bsn.S	LOC108703993		twsg1.S	myo1e	greb1l		dr1.L	manbal.L	paip1.S
bambi.L	reps2.L	dspp		slc4a4.S	nceh1.L	ngfr.S		gak.S	ccdc90b	csnk1g3.S
myt1.L	stx3.L	LOC108713029		ero1b.L	kit.S	slc25a28		josd2.L	nphp4.L	alg10.S
opn5.2.L	pcdh10.L	slc25a1.L		bambi.L	bsn.S	smug1.L		lmtk2.S	pabpc1l.L	polr2k.L
etv2.L	anxa9.L	zfc3h1		myt1.L	reps2.L	stx3		ddx19b.S	itpr1.L	tuba4.L
habp2.L	myo5c.L	phf21b		opn5.2.L	stx3.L	pabpc4.L		stambpl1.L	LOC108699776	dennd4c.S
chrnb2.S	prtg.L	nab1.L		etv2.L	pcdh10.L	slc16a6.L		clasp1.L	brf2.L	timm21.L
tbata.L	tmprss9.L	endod1.L		habp2.L	anxa9.L	myo10.S		atpaf1.S	maea.S	psme4.L
slc6a8.L	adamts10.L	eif4g1.L		chrnb2.S	myo5c.L	efnb1.L		nup35.S	tmem43-like.L	lysmd2.L
olig2.L	arpc1a	mcm5.S		tbata.L	prtg.L	usp31.S		wdr45b.S	rwdd1.S	itsn1.S
rundc3a	sgsm3.L	Xelaev18023478m		slc6a8.L	tmprss9.L	sun1.L		hal.1.L	nsun6.L	snx2.L
esr10.S	ahnak	greb1l		olig2.L	adamts10.L	enc1.L		LOC100036994	ppt1.L	slc12a6.S
LOC108705612	sgsm3.S	ngfr.S		rundc3a	arpc1a	pknox1.S		pole4.L	loc733561.S	ap5m1.L
mef2c.L	pou2f3.L	slc25a28		esr10.S	sgsm3.L	zmynd8.L		sae1.L	ecd.S	zranb3.L
prdm16	rbbp8nl.S	smug1.L		LOC108705612	ahnak	mapk6.S		pou2f1.L	qsox1.S	slc38a10.S
p2ry2.S	Xelaev18028823m	stx3		mef2c.L	sgsm3.S	lef1		ptpn14.L	vmp1.S	naif1.S
nrxn3.L	plekha6.S	pabpc4.L		prdm16	pou2f3.L	tdg.S		LOC108705022	c1orf21.L	dda1
arhgef25.L	pheta1	slc16a6.L		p2ry2.S	rbbp8nl.S	bend3.S		manf.L	kcnab2.L	slc9a3r1.S
hrh1.S	krt.L	myo10.S		nrxn3.L	Xelaev18028823m	elmsan1.L		fam214b.L	kidins220.S	frg1.L
dach1.S	sidt1.L	efnb1.L		arhgef25.L	plekha6.S	scml2.L		fgd1.L	mettl25.L	usp24.L
Xelaev18001208m	sptlc3.S	usp31.S		hrh1.S	pheta1	actr5.S		fam3a.S	proca1.L	btaf1.L
ripor2	dipk1c.S	sun1.L		dach1.S	krt.L	cachd1.S		slk	kif2a.L	ppm1e.S
LOC108712047	cdx2.S	enc1.L		Xelaev18001208m	sidt1.L	sp7.L		cxcr4.L	cox7a2l.L	c11orf73.L
tmeff1.S	gcm1.S	pknox1.S		ripor2	sptlc3.S	aox2		uaca.L	tmem120b.L	slc38a9
Xelaev18018363m	ephb1.S	zmynd8.L		LOC108712047	dipk1c.S	ticrr.S		arfip1.S	ralb.L	utrn.L
fgf13.L	tmem181.L	mapk6.S		tmeff1.S	cdx2.S	h1fx.S		cdc14b.L	atp6ap1.2.S	mettl15.S
ntn1.L	LOC108701741	fpgs.S		Xelaev18018363m	gcm1.S	Xelaev18001114m		alg9.L	znf618.S	ppa1.L
mras.L	st3gal2.2.S	lef1		fgf13.L	ephb1.S	mamld1.L		arfgef2-like.S	afg3l1p.L	cyb5r4.S
erf.L	Xelaev18000380m	tdg.S		ntn1.L	tmem181.L	fblim1.S		osr2.L	mdh2.L	uggt2.L
Xelaev18044644m	Xelaev18003636m	bend3.S		mras.L	LOC108701741	pcdh1.L		fam210a.L	LOC108719063	abhd17a.L
LOC108708063	krt8.2.S	elmsan1.L		erf.L	st3gal2.2.S	adipor1.L		sacm1l.L	LOC108699863	stxbp3.L
smad6.S	pik3r2.S	scml2.L		Xelaev18044644m	Xelaev18000380m	bace2.L		micu1.S	lpgat1.L	cog2.S
nox4	slc18a1.S	actr5.S		LOC108708063	Xelaev18003636m	txndc9.L		gpt2.S	myh9.S	trmt5.L
jchain.L	lrrc40.L	npnt.S		smad6.S	krt8.2.S	Xelaev18006061m		ccdc71.L	abcd3.S	atg16l1.L
emid1.L	slc3a2	cachd1.S		nox4	pik3r2.S	atp1a1.L		fgd4.L	dpy19l1.L	ctsd.S
tbx1.L	post9p.L	sp7.L		jchain.L	slc18a1.S	rassf3.S		gipc2.S	pomt2.L	fadd.S
mespa.L	plcb4.S	aox2		emid1.L	lrrc40.L	nxpe4		tmem209.L	cltcl1.L	usp25.S
rnf225	ank3	ticrr.S		tbx1.L	slc3a2	sptssa.S		eri1.L	dpyd.L	ttl.L
il6r.S	slco4c1.L	h1fx.S		mespa.L	post9p.L	snx33.L		papd4.S	gpc4.S	fam46c.L
slc17a7.L	znf827.S	fgfr3		rnf225	plcb4.S	fzr1.L		bloc1s6.S	anks3.L	hmces.L
LOC108714578	LOC108708154	mst1.L		il6r.S	ank3	irf2bpl.S		ctage5.L	ccdc148.L	helz.S
ncr3	Xelaev18000619m	Xelaev18001114m		slc17a7.L	slco4c1.L	lig4.L		spata2l.L	hirip3.S	pde4dip
trh.L	post10.L	mamld1.L		LOC108714578	znf827.S	mllt10.L		fam98a	dctn1.L	cul3.L
Xelaev18002426m	hexd	fblim1.S		ncr3	LOC108708154	disp1.S		mapk8.S	por.L	tada3.L
bach2.L	clptm1l.S	pcdh1.L		trh.L	Xelaev18000619m	pank1.L		slc39a9.S	sccpdh.L	LOC105947450.S
Xetrov90001989m.L	post.L	gs17.S		Xelaev18002426m	post10.L	depdc7.S		bdp1.S	zfand3.L	cnfn.3.L
ceacam19	p2ry11.L	adipor1.L		bach2.L	hexd	isl1.L		dnaja4.1.L	mettl6.S	rnf123.L
cacna1g	lrmp.L	bace2.L		Xetrov90001989m.L	clptm1l.S	tnrc6b.S		tmem2.L	bend5.S	mfn1.S
LOC108719060	taco1.L	rcan1.L		ceacam19	post.L	eif4g1.S		c1orf50.L	kpna6.L	cactin.S
rassf10.S	post7p.L	txndc9.L		cacna1g	p2ry11.L	trim71		rab5b.L	ap3s1	ube2h.S
cat.1.L	parm1	Xelaev18006061m		LOC108719060	lrmp.L	kdm5b.S		pphln1.S	cox15.S	dcp1b.L
rnf112	mpzl2.L	atp1a1.L		rassf10.S	taco1.L	itga5.S		huwe1	naa35.L	wdhd1.L
pdk4.S	rab19.L	rassf3.S		cat.1.L	post7p.L	chd2.L		gale.L	acsl4.S	ptp4a1.L
LOC108711637	znf185.L	nxpe4		rnf112	parm1	zfc3h1.L		rpp21.S	pard6b.L	acoxl
nr1d2.L	shb.L	sptssa.S		pdk4.S	mpzl2.L	sema6a.S		zdhhc15.S	grb2.S	hmgxb4.S
samd12	syt13	snx33.L		LOC108711637	rab19.L	ncoa2.L		pkp4.S	herc4.S	gdf9.L
nos1ap.S	capn8.2.L	fzr1.L		gprc5c.L	znf185.L	slc44a3.L		snrnp35.L	impa2.L	mmp15.S
npr3.L	mcidas.L	irf2bpl.S		nr1d2.L	shb.L	ndufv2.L		crkl.L	gyg1.S	caprin2.L
tmem72.L	LOC108695829	lig4.L		samd12	syt13	tmem259.S		upk1b.L	traf3ip2	plpp1.L
rbm47.S	csta	mllt10.L		nos1ap.S	capn8.2.L	fam222a.S		wasl.L	homer2.L	gpi.L
rxfp1.S	klf3.S	disp1.S		npr3.L	mcidas.L	cmip.S		irx1.S	timm44.S	trmt11.L
p2ry1.S	frk.L	pank1.L		tmem72.L	LOC108695829	zbed6cl.S		avl9.L	zp4.2.L	tarbp1.L
eya1.S	cd44.S	depdc7.S		rbm47.S	csta	rbm26.L		cdr2.S	col4a3bp.L	znf830.S
dyrk3.L	rab12	isl1.L		rxfp1.S	klf3.S	foxn4.S		itgb8.L	limch1.L	fam175a.S
a2ml1.L	loc100496187.L	tnrc6b.S		p2ry1.S	frk.L	slc38a3.S		upk2.S	vars2.L	triqk.L
kat6a	LOC108716728	eif4g1.S		eya1.S	cd44.S	mpv17l.S		csnk1e.L	ap3d1.S	LOC108700013
Xelaev18043282m	baz2b.S	trim71		dyrk3.L	rab12	insr.S		zswim4.L	slc25a26.L	Xelaev18011182m
gtf2ird1.L	Xelaev18038969m	kdm5b.S		a2ml1.L	loc100496187.L	parp1.L		efhd1.L	camkmt.L	paip1.L
mgc145260.S	LOC108702204	itga5.S		kat6a	LOC108716728	cebpa.S		ncs1.L	fam193b.L	dnajc14.L
st6gal2.S	acpp	chd2.L		Xelaev18043282m	baz2b.S	afdn.S		manf.S	tom1l2.L	pdcd10.S
slc4a1.L	mars2.L	zfc3h1.L		gtf2ird1.L	Xelaev18038969m	krt8.S		rfwd2.S	trmt61b.L	sh3glb1.S
pnkd.S	LOC108708140	sema6a.S		mgc145260.S	LOC108702204	ghitm.S		tspan13.L	LOC108698101	mipep.L
bsnd.L	ttc22.L	ncoa2.L		st6gal2.S	acpp	sh3rf1.L		nkap.L	vav2.S	srpk3.S
hsd3b1.L	lgalsl.S	slc44a3.L		slc4a1.L	mars2.L	cep170b.L		rnf5.S	arih2.L	extl2.L
pros1.S	ptk2b.L	ndufv2.L		pnkd.S	LOC108708140	wdr77.S		psme3.L	rpap1.L	birc5.2.S
LOC108703407	sgk3.S	tmem259.S		bsnd.L	ttc22.L	hk2.S		dhrs3.S	tbc1d19.L	os9.L
pygm.L	plekha8.L	fam222a.S		hsd3b1.L	lgalsl.S	tnrc6b.L		tmem18.L	calcoco1.S	mycbp2.L
wnt11b.L	myb.L	cmip.S		pros1.S	ptk2b.L	ptbp3.L		prkar2a.S	lrrc49.L	gyg
galr3.S	tekt2.S	zbed6cl.S		LOC108703407	b4galt1	ventx1.1.S		ptprf.S	kdm4c.L	sfxn4.L
xfrp	nhsl1	rbm26.L		pygm.L	sgk3.S	LOC108705295		plcl2	scarb2.L	pip4k2c.S
nsg1.L	atl3.L	foxn4.S		wnt11b.L	plekha8.L	atf7ip.L		mixer.S	tsc22d1.L	mettl9.L
miga2	Xelaev18028825m	slc38a3.S		galr3.S	myb.L	LOC108713945		neurl4.S	serpine2.L	npc1.L
rhbdl3	hes5.3.S	mpv17l.S		xfrp	tekt2.S	kmt2a		dctpp1.L	c7orf60.L	mtmr1.L
serpind1.L	baz2b.L	insr.S		nsg1.L	nhsl1	myc.L		kif20a.S	MGC115587	LOC100127794.L
slc16a3	nradd.L	parp1.L		miga2	atl3.L	zswim9		ndufaf1.L	stk3.S	wdfy3
ppp1r13l.L	mafb.S	cebpa.S		rhbdl3	Xelaev18028825m	entpd4.S		prkar2a.L	specc1	sorl1.L
Xelaev18032183m	pxdn.S	afdn.S		serpind1.L	hes5.3.S	pcdh1.S		sec24b.L	ccne2.S	ctdp1.S
LOC108713175	hspa5	krt8.S		slc16a3	baz2b.L	foxo4.L		ppfibp2	arhgap33.L	capn7.L
ttn	pcdh7.S	ghitm.S		ppp1r13l.L	nradd.L	stambp.L		arel1.L	tbc1d17.S	umad1.L
muc1.L	fam83e.S	sh3rf1.L		Xelaev18032183m	spry4.S	actn1.L		pum2.S	rfxap.L	psip1
otop2	LOC108703547	cep170b.L		LOC108713175	mafb.S	kiaa1549.S		pnhd.L	dock1.S	pkd1l1.L
matn4.S	gramd1a.L	wdr77.S		ttn	pxdn.S	myo3b.L		adpgk	hacd3.S	top1.2.S
myo10.2.S	sult1c4	hk2.S		muc1.L	sowaha.S	gpatch8.S		rbm27.L	snx6.S	efr3a.L
vwc2l.2.L	prmt5.L	tnrc6b.L		otop2	hspa5	rab12.S		prom1.L	ubxn4.L	mapk14.S
Xelaev18046953m	mid1l2.L	ptbp3.L		matn4.S	pcdh7.S	hs3st3a1.L		ventx2.2.L	fpgs.S	qrich1.2.S
abcb4	crybg3.S	ventx1.1.S		myo10.2.S	fam83e.S	atp1a1.S		uba3.S	cul4a.S	fastkd2.L
sorcs3.L	Xelaev18000592m	LOC108705295		vwc2l.2.L	LOC108703547	kmt2e.L		btrc.S	sept10.S	trim44.S
sv2b-like.S	pprc1.L	atf7ip.L		Xelaev18046953m	gramd1a.L	ppp1r18		svil.L	dusp18.L	ubac2.L
pcsk9.L	LOC100492708	LOC108713945		abcb4	sult1c4	capn8.S		clasp1.S	ipo4.L	smap1
fut4.L	raig3	kmt2a		admp2.L	prmt5.L	sh2b1.L		arl2.L	cnpy2.L	tbc1d5.L
cfb.L	chpf.S	myc.L		sorcs3.L	mid1l2.L	LOC108702355		gpr180.S	tmem65	cacnb4.S
hoxd1.S	insr.L	zswim9		sv2b-like.S	crybg3.S	esrp1.S		zic3.L	ezh2.S	smagp.L
nts.L	angpt4.L	entpd4.S		pcsk9.L	Xelaev18000592m	phip.L		sumo1.L	tmem106b.L	bloc1s6
ptprn.S	rnf145l.L	pcdh1.S		fut4.L	pprc1.L	bcorl1.L		scube2.S	ncdn.S	h6pd.S
slc39a5.L	tnk2.S	foxo4.L		cfb.L	LOC100492708	map4k3.L		LOC108706563	dgat2.L	pla2g6.L
Xelaev18017221m	sytl2.L	stambp.L		hoxd1.S	raig3	meis3.S		tmx1.L	LOC108704254	ccdc124.S
LOC108708906	ndel1.S	actn1.L		nts.L	chpf.S	slc8b1.L		rab8b.L	alg3.S	tmem62.S
LOC108705531	eps8l1.L	kiaa1549.S		ptprn.S	insr.L	det1.L		taf4b.S	elp3.L	gnai1.S
Xelaev18047655m	hes5.5.L	myo3b.L		slc39a5.L	angpt4.L	rest.L		eef1akmt3.L	rptor.L	trim23.S
pde4c.S	tmem87b.L	gpatch8.S		Xelaev18017221m	rnf145l.L	atf7.S		luzp1.S	tbc1d12.L	cmtm7.L
scai.S	rspo2.L	rab12.S		LOC108708906	tnk2.S	ints6l		pus1.S	lrba.L	phc3.L
hps5.L	sult6b1.5.L	hs3st3a1.L		LOC108705531	sytl2.L	trim71.S		c18orf8.L	agpat1.L	stk3
b3galt5	chsy1.S	atp1a1.S		Xelaev18047655m	ndel1.S	dcaf8.S		sowaha.S	ttc39b.L	ociad1.L
msx2.L	susd1.S	kmt2e.L		pde4c.S	eps8l1.L	wwc2.S		ppp1r13b.L	acot9.L	pdzd2.S
dexi	sgk2.L	ppp1r18		scai.S	hes5.5.L	trim8.L		prmt7.L	map3k5	alkbh8.S
Xelaev18033837m	krt222.S	capn8.S		hps5.L	tmem87b.L	anxa2.S		arl2bp.L	socs3-like.1.L	dctn2.S
Xelaev18010183m	nxpe3	sh2b1.L		b3galt5	rspo2.L	polm.S		lefty.L	nbn.L	gna11.S
cfp.L	phlda2	LOC108702355		msx2.L	sult6b1.5.L	rbm23.L		gad1.2.S	chst2.L	add3.S
arnt2.S	fa2h.L	LOC108718648		dexi	chsy1.S	fam83h.S		pvrl1-like.2.S	rcn1.L	eomes.S
ism2.L	rab3d.S	esrp1.S		Xelaev18033837m	susd1.S	fryl.L		adam28.1.S	zzef1.S	myo1c.L
trpm2	steap3.L	phip.L		Xelaev18010183m	sgk2.L	cpt1a.L		gne.L	ptprs	naa16-like.L
creb3l4.S	abcg2.L	bcorl1.L		cfp.L	krt222.S	tuba3c.S		lman1.S	plcd3.L	patl1.L
tbc1d14.L	prr5.L	map4k3.L		arnt2.S	nxpe3	tmem45a.L		timm50.L	pard3b	gtf2i.S
zfp36.S	Xelaev18037130m	meis3.S		ism2.L	phlda2	mllt4.L		loc100494211.S	sat1.S	gpm6b.L
LOC108716735	rab25.L	slc8b1.L		trpm2	xarp.L	golm1.L		eif4enif1.S	herc6.S	gs17.L
prickle2.S	lrrc36.L	det1.L		creb3l4.S	fa2h.L	mcm2.S		fam122b.L	nprl3.L	fez2.L
b4galt6.L	cdx1.S	rest.L		tbc1d14.L	rab3d.S	meis3.L		nemf.L	iqgap2.S	sept11.L
lrrn4cl.L	syt8.L	atf7.S		zfp36.S	steap3.L	plxnb2.S		trim54.L	paox.L	abca5.S
adgrg6	nkain4.S	ints6l		LOC108716735	abcg2.L	rlim.L		rbm27.S	LOC108704499	dmtf1.S
znf750.L	znf185.S	trim71.S		prickle2.S	prr5.L	bmp7.1.L		xmc.S	mnd1.L	tulp4.L
fblim1.L	sult6b1.5.S	dcaf8.S		b4galt6.L	Xelaev18037130m	fibp.L		pibf1.S	entpd2.S	naglu.L
arsi.S	fbxw2.L	wwc2.S		lrrn4cl.L	rab25.L	glipr2.S		prss33	smtn.L	LOC108700142
b4galt5	LOC108701744	trim8.L		adgrg6	lrrc36.L	LOC108713946		nbeal1.L	ska3.L	usp24
inf2.S	cdk5rap3.L	anxa2.S		znf750.L	cdx1.S	prdm2.S		irf6.L	mrpl1.S	pawr.L
clcnkb	LOC100486385.L	polm.S		fblim1.L	syt8.L	ncor1.S		gas2l3.L	usp43.L	smn2.S
setbp1.L	vsig8.L	rbm23.L		arsi.S	nkain4.S	ifrd1.S		nrdc.S	smarca2	LOC108719555
hapln3.L	tusc2.L	fam83h.S		b4galt5	znf185.S	hs6st1.S		dnah6	fermt2.S	tpx2.L
c5.2.L	zfand4.S	fryl.L		inf2.S	sult6b1.5.S	stim1.S		LOC101731753.L	fsip1.L	grip1
LOC101732807.L	klf15.2.S	cpt1a.L		clcnkb	fbxw2.L	post5.S		LOC108700229	hebp2.S	cenpo.L
LOC108706398	bnip1.L	tuba3c.S		setbp1.L	LOC108701744	rad54l2.S		il17rd.L	tram2.L	prkar2b.S
bmp3.S	fam3d.S	tmem45a.L		hapln3.L	cdk5rap3.L	MGC82989		slc35a4.S	uchl3.L	pomgnt1.S
tead4.L	gas1.L	mllt4.L		c5.2.L	LOC100486385.L	pknox1.L		snai1.L	slc15a4.S	zc3h11a.S
gas2l1.L	arhgef40.S	golm1.L		LOC101732807.L	vsig8.L	clasrp.L		slc2a13.S	ift88.S	atp6v0a1.S
Xelaev18015828m	plk3.S	mcm2.S		LOC108706398	tusc2.L	akap13.S		loc100494211.L	gnpat.S	atp2b1.S
LOC100485105.S	Xelaev18013479m	meis3.L		bmp3.S	zfand4.S	gmeb2.L		scyl2.S	fam60a.L	pold2.L
MGC130877	pdxdc1.S	plxnb2.S		tead4.L	klf15.2.S	cry1.L		lman1.L	kif23.S	ptdss2.L
Xelaev18022166m	thbs1.L	rlim.L		gas2l1.L	bnip1.L	khdc4		ssb.L	pdxk.L	lzic.L
Xelaev18013765m	tbx2.S	bmp7.1.L		Xelaev18015828m	fam3d.S	ppp1r12a.S		frzb.S	vps13a.L	adcy4.L
olfm4.L	pgp.L	fibp.L		LOC100485105.S	gas1.L	ipo5.L		arhgef18	nxpe3l.1.S	brox.S
Xelaev18041815m	tmem251-b	slc7a8.S		MGC130877	arhgef40.S	krt5.7.L		lnpep.L	sdha.S	pigh.L
Xelaev18038720m	nxpe2.L	glipr2.S		Xelaev18022166m	plk3.S	LOC108714701		1a11.L	kiaa0319l.S	velo1.L
galnt16.L	loc100492168.L	LOC108713946		Xelaev18013765m	Xelaev18013479m	nr1h2.L		st14.S	mxd3.S	rwdd1.L
nrarp	klf15.2.L	prdm2.S		olfm4.L	pdxdc1.S	LOC108698093		srpk3.L	rfc3.L	amfr.L
st3gal2.1.S	hivep1.S	ncor1.S		Xelaev18041815m	thbs1.L	tfcp2.L		stim2	ipo8	megf11
MGC53786	mboat1.S	ifrd1.S		Xelaev18038720m	tbx2.S	chpf.L		tm9sf1.S	kmt5a.S	fbxo34.S
tmprss11bnl	nfe2l3.L	hs6st1.S		galnt16.L	pgp.L	nr2f6		LOC108719085	eif5b.L	plrg1.L
dach1.L	ccdc129.L	stim1.S		nrarp	tmem251-b	prpf39		ncald.S	agl.S	mmadhc.L
LOC108705839	nkd1.L	wnk2		st3gal2.1.S	nxpe2.L	gmps.L		mrs2.L	pik3c2a.S	pik3r2.L
Xelaev18025987m	myo9a	mycl.L		MGC53786	loc100492168.L	cdc34.S		enpp6.L	pcyox1.L	cnep1r1.L
LOC108698309	wars2.L	post5.S		tmprss11bnl	klf15.2.L	nid2.S		tdrp.L	nfatc3.S	mrpl1.L
kank1.L	cdx4.L	rad54l2.S		dach1.L	hivep1.S	znf282		armc7.L	trim25	mocs3.L
tdgf1.2.S	trabd.S	MGC82989		LOC108705839	mboat1.S	znf516.L		grhl1.L	hsd17b12.L	papd5.L
myh6.S	tacc2.L	pknox1.L		Xelaev18025987m	nfe2l3.L	ndc1.S		MGC68680	LOC108718648	gdf9.S
LOC108715341	dmxl1.L	clasrp.L		LOC108698309	ccdc129.L	LOC108715906		stra6.L	p2ry2.L	dnah3
ccdc80.L	msantd3.S	akap13.S		kank1.L	nkd1.L	krt8.L		arfgap2.S	rufy1.L	ecsit.S
arhgap12.L	sytl5.S	gmeb2.L		tdgf1.2.S	myo9a	cbx1.S		fgd1.S	rab3ip.S	gng10.L
atoh1.S	xk81a1.S	cry1.L		myh6.S	wars2.L	tonsl.L		lrig3.S	neil3.L	siae.S
grpel2.L	fam83g.S	khdc4		LOC108715341	cdx4.L	LOC108708226		LOC108704685	slc25a13.S	pdcd10.L
prrt3-like.S	nup188	ppp1r12a.S		ccdc80.L	cyp26a1.S	kdm5b		rgs12.L	LOC101734284-like.L	cyp4v2.S
Xelaev18024346m	rnf43.L	ipo5.L		aifm3.L	trabd.S	pds5b.L		spg21.S	bri3bp.L	pitpnb.2.S
arhgap36.L	rchy1.L	krt5.7.L		arhgap12.L	arhgef28.S	hsf2.L		pqlc2.L	fnip2.S	armc8.S
slc5a6.L	tbc1d30.S	LOC108714701		atoh1.S	tacc2.L	cdk17.L		helt.L	nras.L	dennd2d.S
eva1a.L	emc1.L	nr1h2.L		grpel2.L	dmxl1.L	agap1.L		eif1.L	plin2.S	irak1.L
chsy3	rfk.S	LOC108698093		prrt3-like.S	sp5.L	rtcb.L		MGC79993	trim39	zar2.L
tesk1.S	igsf9b.L	tfcp2.L		Xelaev18024346m	msantd3.S	kdm3a.S		naa60.L	impa2.S	slc7a9.L
slc38a8.L	pi4k2a.L	chpf.L		arhgap36.L	sytl5.S	baz1b.L		pomk.L	slc2a9.L	pfkfb3.L
sh2d3c.S	gk.L	nr2f6		slc5a6.L	xk81a1.S	rbm25.L		dnaaf1.S	pir.L	slc9a7.S
Xelaev18032195m	csrnp2.L	prpf39		eva1a.L	errfi1.L	mcm6.2.L		sema4b.L	fuca1.L	xtm4
dstyk.S	samd8.S	gmps.L		chsy3	fam83g.S	trpv5.L		uprt.L	sh3bp5.L	muc5acl.S
skil.L	c1galt1c1.L	cdc34.S		tesk1.S	nup188	tmco3.L		rassf7.S	hadha.S	mbp.S
cers6	capn13.L	nid2.S		slc38a8.L	rnf43.L	mtf1.L		tRNA-Met	mospd2.L	fut10.L
fam8a1.L	wdr12.S	znf282		sh2d3c.S	rchy1.L	LOC108719489		insrr.L	rint1.L	c1qbp.S
s100a10.S	notch2.L	znf516.L		Xelaev18032195m	znf503	gng7.L		gltp.S	lamtor1	lamp1.S
pdgfa.S	znf362.L	ndc1.S		dstyk.S	zdhhc9.L	fbxl3.S		ptcd1.L	mkrn1.S	thada
Xelaev18035110m	flrt2.L	LOC108715906		skil.L	tbc1d30.S	hells.S		c19orf12.S	fmo2	cc2d1b.S
LOC108703211	otud4.S	krt8.L		cers6	emc1.L	arhgap5.L		LOC101733813.1	gprc5c.L	pigs.L
prex2	MGC114904	xpr1.L		fam8a1.L	rfk.S	lsm4.L		mgat4a.S	cyp2c18.S	arl15.L
f2rl1.L	slc17a9.S	cbx1.S		s100a10.S	igsf9b.L	c1orf84.L		slc5a9.L	ppp1r9al.L	ehbp1.L
tubb3	pprc1	tonsl.L		pdgfa.S	pi4k2a.L	eral1.L		hnrnpll.S	prune.L	smc6.L
sorcs1.S	gcm1.L	LOC108708226		Xelaev18035110m	gk.L	cry1		tspan13.S	cetn3.L	cuedc1.L
crhr2.L	dedd2.S	kdm5b		LOC108703211	csrnp2.L	fndc3a.2.L		mtmr8	ap3s1.S	LOC108711140
endod1	ttc39c.L	pds5b.L		prex2	samd8.S	trappc13.S		elavl2.L	ca10.L	uqcc2.S
hcrtr2.L	tns2.L	hsf2.L		f2rl1.L	c1galt1c1.L	acvr2b.S		rab27a.L	tbc1d22a	pef1.L
evx1.L	c2cd5	cdk17.L		tubb3	capn13.L	trim33.L		tecpr2.L	tmem184c.L	ctu1.L
fam179a.S	gdpd1.L	agap1.L		sorcs1.S	pvrl1-like.2.S	slc35f5.L		uxs1.L	kctd5.L	taok3.L
cfd.L	LOC108719509	fam171a1.L		crhr2.L	wdr12.S	ywhae.L		acvr1.L	enosf1.S	ppp2r2b.S
c5.L	slc35e2b.L	rtcb.L		endod1	notch2.L	ncor1.L		b4galt1	pask.L	tor1b.L
atf3.S	cmtm3.L	kdm3a.S		hcrtr2.L	znf362.L	dnajb12.S		prrg4.L	otud6b.S	jak2.L
LOC108711502	gtf3c5.S	baz1b.L		evx1.L	flrt2.L	proser1.L		tmem150b.S	yes1.L	heatr5b.L
efnb3	krt18.3.S	rbm25.L		fam179a.S	otud4.S	cdc7.L		dld.S	LOC108711638	stk26
LOC108709100	ano9.L	mcm6.2.L		cfd.L	MGC114904	kiaa1191.S		slc1a5.L	adam17.S	letm1.S
mtmr7-like.L	sipa1l3.L	trpv5.L		c5.L	slc17a9.S	LOC108714696		Xelaev18031388m	inpp5f.L	LOC108714350
Xelaev18028750m	mfsd6.S	tmco3.L		atf3.S	pprc1	ankrd17		sec24b.S	loc108718668.L	fam26d.L
LOC108705534	nrbp2.L	mtf1.L		LOC108711502	gcm1.L	top2b.S		aldh1a2.S	timm50.S	ano1.L
Xelaev18008189m	ttc39a.L	LOC108719489		efnb3	dedd2.S	fzd10.L		glmn.L	tax1bp1.L	wdr44.S
capn2.2.L	txndc11.L	gng7.L		LOC108709100	ttc39c.L	cnot3.L		dusp22.S	LOC100505442	trmt44.L
st6gal2.L	arhgef16.L	fbxl3.S		mtmr7-like.L	tns2.L	march6.L		itgb3.L	smarcal1.L	hip1r.L
LOC108701132	LOC108709890	hells.S		Xelaev18028750m	c2cd5	zc3h4		ppp1r14a.L	pkr2.L	eml2.L
faah.3.S	alg11.L	arhgap5.L		LOC108705534	gdpd1.L	ago4.L		sebox.L	cnpy2.S	aldh7a1.S
vangl1.S	tuba1cl.3.S	lsm4.L		Xelaev18008189m	LOC108719509	ubr5.L		mettl4.S	lrwd1.L	brms1l.L
rnf165.S	slc30a10.L	c1orf84.L		capn2.2.L	slc35e2b.L	rpl19.L		prnp	cyfip2.S	ccdc62.L
trpm6.L	trappc4.S	eral1.L		st6gal2.L	galnt6	slc7a6.L		akap12.L	ap1ar.L	vta1.L
smad7.L	atp2a3.L	cry1		LOC108701132	cmtm3.L	surf6.L		llgl2.L	slc31a1.S	lpar6.L
a2m	sbf2.L	fndc3a.2.L		faah.3.S	gtf3c5.S	eef1a1.L		tvp23b.S	hacd3.L	rabgap1l.S
glis3.S	prelid1.L	trappc13.S		vangl1.S	krt18.3.S	apeh.L		ibtk.L	dapk3.L	gdpd5.L
glul-like.1.L	LOC100037903.1	acvr2b.S		rnf165.S	ano9.L	gpbp1l1.S		wasll.L	rfx2.L	clstn2.S
mamld1.S	adck1.L	trim33.L		trpm6.L	sipa1l3.L	c19orf68.L		vcan.L	cwc27.S	slmap.L
LOC108719828	mroh1.S	slc35f5.L		smad7.L	mfsd6.S	upf3b.L		mix1.L	slc10a7.L	rnaseh1.S
junb.L	sh2b3.S	ywhae.L		a2m	nrbp2.L	rps3a.S		anks1a.S	bace1.L	mrps17.L
sema5b.S	cib1.S	rfx2.L		glis3.S	ttc39a.L	rps5.S		LOC108704134	LOC108707216	fzd7.L
gpr52.L	Xelaev18008019m	ncor1.L		glul-like.1.L	txndc11.L	tab3.L		abca1.S	hemk1.L	rwdd4.S
Xelaev18000128m	osbpl2.S	dnajb12.S		mamld1.S	arhgef16.L	rps3a.L		schip1.L	c8orf76.S	hmmr.L
tsku.L	trpm4	proser1.L		LOC108719828	LOC108709890	rps6.L		wwc1.L	taf1d	rnf126.L
LOC108717136	LOC108704672	cdc7.L		junb.L	alg11.L	trrap.L		mcfd2.S	pfkfb4.S	fitm2.L
nos1.L	kdm7a.S	kiaa1191.S		sema5b.S	tuba1cl.3.S	mga.L		ddb2.L	sppl2b.S	styx.S
timp2.S	rock1	pi4ka.L		gpr52.L	slc30a10.L	rfx5.S		sfrp2.L	ano10.L	galnt2.S
sema4c.L	vtcn1.L	LOC108714696		Xelaev18000128m	trappc4.S	itpr2		trpv4.L	snx5.L	LOC108709286
klf13.S	LOC108697430	ankrd17		tsku.L	atp2a3.L	top2b.L		loc100127873.L	ikbip.L	dctn2.L
arnt2.L	gripap1.L	top2b.S		LOC108717136	sbf2.L	arf1.S		galnt6	MGC68519	arhgap29.L
Xelaev18022167m	furin.L	fzd10.L		nos1.L	prelid1.L	kiaa0907.L		clcf1.L	farp1	ggps1.S
pde3a	gcnt4	cnot3.L		timp2.S	LOC100037903.1			Xetrov90015528m.L	cep19.L	cask.L
slc23a2.L	LOC108716776	march6.L		sema4c.L	adck1.L			dixdc1.L	herc3.L	spef1.L
tf.S	golgb1.L	zc3h4		klf13.S	mroh1.S			eps8l2.S	zc3h7b.L	cflar.L
ecm1.S	lgalsl.L	ago4.L		arnt2.L	sh2b3.S			ift140.L	pi4ka.L	dis3l.L
ankdd1b.L	ndc1.L	ubr5.L		Xelaev18022167m	cib1.S			ptprg.L	sertad1.S	ints2.S
hmgcs1.L	Xelaev18027889m	rpl19.L		pde3a	Xelaev18008019m			rbfox3	calcoco1.L	cenpa.L
h2afy2.S	dync1i1	slc7a6.L		slc23a2.L	osbpl2.S			irf6.2.S	wdr81.L	tyw3.L
c1orf127.L	c14orf37.L	surf6.L		tf.S	trpm4			xarp-like.S	mettl22.L	anks1a
tnk2l.S	amot.S	eef1a1.L		ecm1.S	LOC108704672			tmf1.L	vps18.S	mgat4a.L
aff2.S	dhrs3.L	apeh.L		ankdd1b.L	kdm7a.S			daam1.S	tbc1d23.S	atl2.L
col13a1	ago1.L	gpbp1l1.S		hmgcs1.L	rock1			stx5.S	ccdc69.L	gpr137c.L
mesp2.S	wdr18.L	c19orf68.L		h2afy2.S	vtcn1.L			tnfsf10l.L	LOC108699095	klc1.L
kcnk18.L	LOC108701284	LOC100158389		c1orf127.L	LOC108697430			alg6.L	mst1.S	ube2g1.L
Xelaev18001656m	msx1.L	upf3b.L		tnk2l.S	gripap1.L			pgm2l1	rap1a.L	mcoln2.L
slc18a3.S	xk81a1.L	rps3a.S		aff2.S	furin.L			Xelaev18036963m	adarb1.S	prickle4.S
epas1.S	myo5b.S	rps5.S		col13a1	gcnt4			Xelaev18000237m	fam122a.S	fopnl.L
zbtb46.S	slc25a22.L	tab3.L		mesp2.S	xarp-like.S			hsph1.S	rap1a.S	tmem2.S
esyt3.S	adam9.S	rps3a.L		kcnk18.L	LOC108716776			rassf1.L	rnf157.L	rnf34.L
tmtc1.L	mbd6.S	rps6.L		Xelaev18001656m	apcdd1.S			glmp.L	xxylt1.L	nf2.L
pla2g10.S	efnb2.L	trrap.L		slc18a3.S	golgb1.L			scarb1.L	banp.L	hook2.L
tnip2.L	tmem87a.L	mga.L		epas1.S	lgalsl.L			apc.L	wfs1.L	mov10l1.L
zfp36l1	btc.S	rfx5.S		zbtb46.S	ndc1.L			scoc.S	suox.S	smarca5.S
abcb5	trpm5.L	itpr2		esyt3.S	Xelaev18027889m			MGC68655	spast.S	b3glct
tead4.S	fut6.S	top2b.L		tmtc1.L	dync1i1			tmem255a.S	slc2a8.L	myof.1.L
fosl2.L	vegfa.L	arf1.S		pla2g10.S	c14orf37.L			jak1.L	pms1.S	ppp2r2b.L
rbm38.S	fzd3.L	kiaa0907.L		tnip2.L	amot.S			larp4.L	slc41a2.S	cep41.S
myo10	galnt4.L	ofd1.L		zfp36l1	dhrs3.L			dact1.S	pard3b-like.L	gpd2.S
MGC154819	map3k10.L	xrn1.L		abcb5	ago1.L			pik3ca.S	brca1.L	nptn.L
chst3.L	rapgef2.L	wdr44.L		tead4.S	wdr18.L			rcor1.L	uhrf1.L	birc5.2.L
ccn2	LOC108701155	cul4b.S		sspo.L	LOC108701284			mrpl54.S	sra1.S	g6pc.L
fam214a.L	mkl1.L	gtf2e2.L		fosl2.L	msx1.L			naa15.L	ubxn4.S	dennd4b.L
fmo5	ttc21b.S	cdc123.S		rbm38.S	xk81a1.L			csnk1e.S	shisa5	ivns1abp.L
rbbp8.L	ago1.S	pou5f3.2.L		myo10	myo5b.S			hnf1b.S	irs2	cep131.L
fntb.L	ag1.S	ccnb1.2.L		MGC154819	slc25a22.L			slc1a6.S	mrpl36.L	tmem57.L
scel	wdr66.L	psap.S		chst3.L	adam9.S			bix1.3.S	kcnab2	sclt1.L
bcl2l12.L	ergic2.L	rabep1.S		ccn2	mbd6.S			xvent-2b	slc25a29.S	baiap2.S
hes9-1.S	cdc42bpa.L	tuba4.S		fam214a.L	efnb2.L			rin2.L	xzar2	atg4c.S
slfn13.L	bicd1	scaf11.S		fmo5	tmem87a.L			nckap5l.L	nusap1.S	sucla2.L
fn3k.L	tsga10.L	ptprk		rbbp8.L	btc.S			arhgap27.S	pigo.L	lmo7.S
tnfrsf19.S	angpt4.S	ppm1d		fntb.L	trpm5.L			bsg.S	gltp.L	pus7.L
ahdc1.L	dcaf13.S	nomo3.S		scel	fut6.S			pnrc2.L	Xelaev18025079m	tut7.S
grhl2.S	LOC108701721	wls.S		bcl2l12.L	vegfa.L			zdhhc16.S	rnf216.L	nfkbie.L
rnd3.L	sytl2.S	kiaa1109.L		hes9-1.S	fzd3.L			gclc.L	kcnk7.L	fbxo25.L
dkk2.L	per2.L	znf276.S		slfn13.L	galnt4.L			Xelaev18010420m	ptges2.L	mpp6.L
sept12.L	slc35c2.S	phf14.L		fn3k.L	map3k10.L			sox11.L	spidr.L	tubgcp3.S
tmem56.2.S	pgm3.L	dnal4.L		tnfrsf19.S	rapgef2.L			aldh7a1.L	rab22a.S	dhcr24.S
Xelaev18022244m	stam2.L	napa.S		ahdc1.L	LOC108701155			sulf1.L	spata18.L	tango6
il1rap.L	dab2ip.L	rngtt.S		grhl2.S	mkl1.L			spata13.L	rabep1.L	adarb1.L
anpep.S	rpe65.S	lpp.L		rnd3.L	ttc21b.S			exd2.L	zpax.L	ubac1.L
muc1.S	pde4a	mob3a.L		dkk2.L	ago1.S			LOC108706156	Xelaev18040026m	pam.S
LOC108716750	krt12.S	mon2.L		sept12.L	ag1.S			rad51d.L	fam21a.L	dus1l.L
stxbp5.S	degs3.S	arfgef1		tmem56.2.S	wdr66.L			hhex.S	LOC108705723	cdo1.S
dapk1.S	hes6.1.L	vps35.S		Xelaev18022244m	ergic2.L			thnsl1.L	appl1.S	eomes.L
stard13.L	trim8	cul3.S		il1rap.L	cdc42bpa.L			fam115a-like.L	spata13.S	capn5.S
st3gal2.1.L	fut3.L	cdr2.L		anpep.S	bicd1			tmf1.S	ccar1.S	plin3.L
plppr4.S	znrf3.S	fig4.L		gprc5c.S	tsga10.L			tmem45b.S	eloa	pdpr.L
LOC108700061	rsph1.L	LOC108711198		muc1.S	angpt4.S			chrd.L	kctd2-like.L	iqgap1
arhgap6	prdm2.L	sirt4.L		LOC108716750	dcaf13.S			homez.S	LOC108708164	LOC100489554.L
Xelaev18006811m	lsm1.S	vta1.S		stxbp5.S	LOC108701721			nav3.S	prodh.L	tbc1d1.S
bora.L	kiaa1324.S	atp6v0c.L		dapk1.S	sytl2.S			plxna1.L	ireb2.L	not.S
pank3.S	ralgps1.S	eif2b5.S		stard13.L	thap5.S			bix1.1.S	tube1.L	clint1.L
sik1.S	alad.L	znf407.L		st3gal2.1.L	per2.L			lgi4.L	tmem220.L	mfsd4b.S
lmx1b.1.L	fam199x.S	pan2.S		plppr4.S	slc35c2.S			fzd8.L	pid1.L	dcaf6.L
opn8.S	klf6.S	gtf2a1.S		LOC108700061	pgm3.L			mixer.L	rnf123.S	cdc27.S
LOC108707645	slc35c1.L	ykt6.S		arhgap6	stam2.L			fam102b.L	sox2.L	sh3d19.L
ppp1r3d	fam120c	znf182		Xelaev18006811m	dab2ip.L			LOC100191024	LOC108719053	tor1b.S
arsk.L	fam83a.S	cdc27.L		bora.L	rpe65.S			slain2.L	lrp1.S	dapl1.L
cblb.S	capn1.L	odc1.S		pank3.S	pde4a			galnt6.1.S	eogt.L	pnpt1.S
klf9.L	osbpl8.L	MGC81630		sik1.S	krt12.S			dip2c	h6pd.L	LOC108719547
tiam1.L	ercc4.L	smap1.L		lmx1b.1.L	degs3.S			tnfrsf19.L	ppp1r9a.L	ssbp2.L
znf469.L	rasgef1b.L	txlng.L		opn8.S	hes6.1.L			slc2a1.L	fbf1.L	orc6.L
rnf144b.S	slc39a6.S	MGC97820.L		LOC108707645	trim8			gramd1c.L	myo1a.L	lrrk2.L
tcp11l1.L	mfsd6l.L	herc4.L		ppp1r3d	fut3.L			pitx1.L	agpat4.S	plxna1.S
foxh1.L	Xelaev18030675m	nelfb.L		arsk.L	znrf3.S			MGC80416	agtrap.L	trappc8.L
lrp4.L	hprt1.L	naf1.L		cblb.S	rsph1.L			ccser2.L	gphn.L	ccz1b.L
hspg2.L	nfe2l3.S	atp6v1h.L		klf9.L	prdm2.L			mtss1.1.S	ppp3cb.L	mgat4b.L
znf532.L	fam174b.S	rnf14.5.L		tiam1.L	lsm1.S			prkaca.S	ntpcr	tbc1d1
slc7a5.L	timm17a.L	clpx.L		znf469.L	kiaa1324.S			tstd2.S	cep41.L	LOC108709626
sesn1.L	nlrc4.L	pou5f3.2.S		rnf144b.S	ralgps1.S			tmprss9	lmbr1.L	tnfaip8l3.S
fbp1.L	pmm2.L	metap1.L		tcp11l1.L	alad.L			Xetrov90004873m.L	cisd2.S	tll2.L
hao1.L	tmem170a.S	fbxl5		foxh1.L	fam199x.S			snx31.L	morc3	mpp6.S
slc5a3.L	slc18a1	wdtc1.L		lrp4.L	klf6.S			dcbld1.L	hcn2.S	map3k4.S
Xelaev18017686m	myc.S	cand1.L		hspg2.L	slc35c1.L			aim1.L	slc37a2.L	agbl5.S
prrx1.L	slc30a7.S	kiaa1033.L		znf532.L	fam120c			ccdc141.L	ppm1l.L	tbc1d22b.S
LOC108709923	LOC108698396	flna		slc7a5.L	fam83a.S			thap5.S	rabac1.S	arl6.L
zfp36l1.S	gemin7.L	gpa33.S		sesn1.L	capn1.L			pou2f1.S	Xelaev18014049m	tmcc2.S
slc13a3.L	napg.L	g6pd.S		fbp1.L	osbpl8.L			ccdc169.S	crbn.L	gtpbp1.S
bambi.S	LOC108709773	MGC68662		hao1.L	ercc4.L			phox2b.S	soat2.S	MGC115657
pim1.S	use1.L	snx2.S		slc5a3.L	rasgef1b.L			LOC108702593	hadha.L	cpt2.S
fermt1.S	c22orf39.L	rpp38.S		Xelaev18017686m	slc39a6.S			mier2.S	pask	nectin1l2.1.S
MGC115708.L	elovl3.S	Xelaev18017238m		prrx1.L	mfsd6l.L			neurl4.L	Xelaev18004920m	ubac1.S
rufy3.S	ciart	bora.S		LOC108709923	Xelaev18030675m			bves.L	MGC130950	gyltl1b.L
rell2.L	man2a1.L	eps8.L		zfp36l1.S	hprt1.L			zfand2a.L	gpr155.S	tceanc2.S
LOC108705130	slc19a2.L	nphp1.L		slc13a3.L	nfe2l3.S			cml	Xelaev18015396m	stx19.L
map9.L	fcn2	ilvbl.L		bambi.S	fam174b.S			LOC108700135	akap8.L	pik3r4.S
tpst1.L	c3orf17.L	otulin.S		pim1.S	timm17a.L			slc10a3.S	plekhm2.S	pcid2.S
cpz.S	nek2.L	hira.L		fermt1.S	nlrc4.L			Xelaev18047094m	inadl.L	not.L
Xelaev18028754m	LOC108695554	dennd4c.L		MGC115708.L	pmm2.L			zc3h3.L	wdyhv1.S	myo1c.S
znf710.S	znrf3.L	sgta.L		rufy3.S	tmem170a.S			ctnnbip1.L	dcaf6.S	zic1.L
usp32.L	styk1.S	cnih4.S		rell2.L	slc18a1			gad1.1.L	map2k5.L	zfyve16.S
epn1.S	stard10.S	reps1.L		LOC108705130	myc.S			esco1.L	mxi1.S	tp53i11.S
il11ra.L	fer1l4	cul9.L		map9.L	slc30a7.S			otx1.S	snx5.S	rab14.S
serpinh1.S	riok1.L	haus1.L		tpst1.L	LOC108698396			kctd12.L	gpx7.S	LOC108713105
evx1.S	hmox1.L	blnk.S		cpz.S	gemin7.L			ankrd13c.L	dhcr24.L	dck.1l.L
MGC82975	uspl1.S	atp6v1a.S		Xelaev18028754m	napg.L			nasp.S	itpkc.L	LOC108706543
mettl24.L	kbtbd4.S	dbr1.L		znf710.S	LOC108709773			adam33.S	mapkap1.L	prss36.L
LOC108700066	LOC108716951	dnal4.S		usp32.L	use1.L			lrig3.L	brap.L	h1foo.L
Xelaev18009275m	adat2.L	stag1.L		epn1.S	c22orf39.L			pax3.L	arhgap12.S	rmdn2.S
ip6k1.S	abhd13.L	nxn.S		il11ra.L	elovl3.S			dopey2.S	MGC75714.S	lace1.L
Xelaev18004738m	uba5.S	eps15l1.L		serpinh1.S	ciart			ephb3.L	nkrf.L	clcc1.S
xbp1.S	fam177b.L	cat.2.S		evx1.S	man2a1.L			Xelaev18003021m	smco4.S	nde1.L
mtmr4.L	xk.L	ppp3ca.S		MGC82975	slc19a2.L			znf503	LOC108704510	b3gnt4.L
myo10.2.L	pvrl4.S	golga4.L		traf4.S	fcn2			enc1.2.S	LOC100488695.S	sh3pxd2b.L
aifm3.S	epn3.L	ergic1.L		mettl24.L	c3orf17.L			crx.L	mcoln3.L	inpp5a.1.L
runx1t1.L	ptp4a3.L	dock5.L		LOC108700066	nek2.L			tnfsf11.S	mrpl3.L	atp9b.L
Xelaev18039481m	atad3a.S	utrn-like.2.S		Xelaev18009275m	LOC108695554			shox	rubcn.L	strn
abcg2.S	camk2g.L	ctdp1.L		ip6k1.S	znrf3.L			Xelaev18034023m	sec31b.S	srsf7.L
fam84b.S	gigyf2.S	snx14.L		Xelaev18004738m	styk1.S			garem1.L	rnaset2.L	lin54.S
mxi1.L	znf408.S	mdc1.L		xbp1.S	stard10.S			pcsk5	abhd16a.L	hnrnpll.L
fsbp	atf7.L	pkmyt1.S		mtmr4.L	fer1l4			tank.S	Xelaev18004919m	fam109b.L
cyth2.L	calr	atp6v0b.S		myo10.2.L	riok1.L			klhdc10.L	LOC108703777	rp2.L
loc100145576.L	btg5.L	nup88.L		aifm3.S	hmox1.L			zc3h3	Xelaev18037615m	pef1.S
Xelaev18001785m	apcdd1.L	cul1.S		runx1t1.L	uspl1.S			snx10.S	vps33a.S	pdpr.S
Xelaev18019967m	atp13a2.L	galc.L		Xelaev18039481m	kbtbd4.S			flvcr1.L	oxct1.L	MGC115216
nrg1.L	tmcc3.L	lrrc1.L		abcg2.S	LOC108716951			tmem251.L	enpp1.L	camkk1.S
pcdha13.L	dcaf4.L	pitpnb.2.L		fam84b.S	adat2.L			kif26a.S	paics.2.L	uxs1.S
ets1.L	tesc.L	ppp2cb.L		mxi1.L	abhd13.L			fzd8.S	slc2a9.S	commd2.L
prex1.S	usp9x.L	cd55		fsbp	uba5.S			mix1.S	rdx.S	atp8b4.L
1700017n19rik	pex11b.L	arfip1.L		cyth2.L	fam177b.L			arsa.1.S	mib2.S	rev1.S
mcc.S	abhd13.S	nrbp1.L		loc100145576.L	xk.L			p4htm.L	MGC75760.L	gls.S
limd2.S	septin9.L	lca5.L		Xelaev18001785m	pvrl4.S			fam110b.S	snap91.S	elavl2.S
cfp	fam199x.L	tpx2.S		Xelaev18019967m	epn3.L			aldh1a3.S	hdac4.S	glce.L
ncam2.S	msx1.S	cdk5rap2.L		nrg1.L	ptp4a3.L			fhl3.L	hmbs.2.S	appl2.L
ccdc68.L	zfpm1.S	dhps.S		pcdha13.L	atad3a.S			dph3.L	mesdc2.L	arntl.S
LOC108717763	cab39.L	slc35b3		ets1.L	camk2g.L			abca8.L	tmem30b.L	ccdc50.S
1700030j22rik	hdac6.L	ric8a.L		prex1.S	gigyf2.S			n4bp3.S	smarcad1.S	loxhd1.L
rybp.L	thumpd2.L	rab5a.S		1700017n19rik	znf408.S			poc5.L	spag6.S	stc1.L
was.S	cdc42bpa.S	trappc11.L		mcc.S	atf7.L			hsp70.L	aplf.L	larp6-like.1.S
gns.S	specc1l	c20orf194.L		limd2.S	calr			tmprss9.S	snn.S	smarcc2.S
gngt2.1.S	clcn5.L	rmdn3.L		cfp	btg5.L			pkdcc.1.S	b9d1	pou5f3.3.L
eya2.S	crocc2	ntan1.L		ncam2.S	apcdd1.L			elk4.S	cntn4.S	btbd8.L
prkci.S	LOC108718861	dck.1.L		ccdc68.L	atp13a2.L			ptprr.L	dpy19l4.S	cetn3.S
pitpnm3.L	slc35a3.2.S	spg7.L		LOC108717763	tmcc3.L			has2.L	cuedc2.S	negr1.L
Xelaev18001994m	rbfox2.S	ccne1.S		1700030j22rik	dcaf4.L			tpbg.L	fam135a.S	kbtbd3.S
cdkn2c.S	col18a1.L	myo5a.S		rybp.L	tesc.L			rdh9.L	wipi1.S	slc18a2.L
tmem200c.S	fam63b.S	pigk.S		was.S	usp9x.L			zic5.L	dhrs7b.L	slc30a2.S
b4galnt4.S	arap1	opa1.L		gns.S	pex11b.L			dop1a	ctnnal1.S	dnajc10.L
traf4.L	degs3.L	anapc4.L		gngt2.1.S	abhd13.S			itprip.L	lrrc16a.L	bod1l1.L
siglec1.L	tbc1d25.S	tmx2.L		eya2.S	septin9.L			pigb.L	slc16a3.L	smco4.L
cfap54	MGC83169	pds5a.S		c15orf39.S	fam199x.L			upp2.S	st3gal-iii	higd1a.S
sox5.L	rrn3.L	tmem33.S		prkci.S	msx1.S			crx.S	slc39a9-like.1.L	mettl16.L
mmel1.L	thumpd3.L	dda1.L		pitpnm3.L	zfpm1.S			pcdh8.2.S	lrrc58.S	inpp4a.S
id2.S	slc12a2.L	arhgap10.L		Xelaev18001994m	cab39.L			thsd7a.L	irf9.L	pik3r4.L
kalrn.S	hmcn2	cdkal1.S		cdkn2c.S	hdac6.L			kiaa0895l.L	acr	hace1.L
ncoa3	c18orf21.L	map7d2.S		tmem200c.S	thumpd2.L			ptprb.L	nuggc.L	prss16.L
sema3f.S	muc3a	fscn1.S		b4galnt4.S	cdc42bpa.S			gramd1a.S	ubxn2a.L	larp1b.S
tnfrsf10b.S	ubiad1.L	mkrn3.L		traf4.L	specc1l			atad3a.L	tmem184b.S	tpgs2.L
rab40b.S	slc39a10	loc100493771.L		siglec1.L	clcn5.L			Xelaev18010896m	LOC108699955	ccdc158
slc6a13.L	krt5.7.S	kiaa0226l.L		cfap54	crocc2			galnt18.S	arhgef39.L	klhdc10
lef1.L	vezt.L	arih2.S		sox5.L	LOC108718861			scube2.L	ube2j1.L	letmd1.L
hes7.1.L	auts2	nsmaf.L		mmel1.L	slc35a3.2.S			tiprl.L	kctd18.L	ccnb1.L
lhfpl2.L	zbtb46.L	cyp17a1.L		id2.S	rbfox2.S			inf2.L	armc8.L	gbf1.S
fgfrl1.L	rin3.L	cul1.L		kalrn.S	col18a1.L			LOC100495222.1.L	cers3.L	inpp4a.L
pias3.L	mfsd6.L	tgfbr1.S		ncoa3	fam63b.S			ednra.L	ppp3ca.L	dapl1.S
tmem79.L	lcmt2.L	sh3bp1.L		sema3f.S	arap1			ntn3.S	slc7a8.S	snx7.L
LOC108696316	chpt1.L	h1foo.S		tnfrsf10b.S	degs3.L			sp5.L	bpgm.S	MGC115273
mid1.L	selenow2.L	dppa2/4.1.L		rab40b.S	tbc1d25.S			rab21.L	natd1.L	ssbp2.S
cd82.L	igf1r.L	hs2st1.L		slc6a13.L	MGC83169			xarp.L	vps9d1.L	LOC108695555
cdh6.S	MGC98819	cand1.S		lef1.L	rrn3.L			lhx1.L	LOC108712544	hpca.S
hao2.L	tacc3.S	irf5.L		hes7.1.L	thumpd3.L			cdk5r2.L	tyro3.L	slc20a2.L
foxa2.L	ube2n.L	mreg.S		lhfpl2.L	slc12a2.L			zdhhc9.L	atxn3.L	cep170.S
Xelaev18028753m	c2cd5.L	mon2.S		fgfrl1.L	hmcn2			foxd2.S	nsun4.L	zar1l.L
acsbg2.S	sh3pxd2a.L	mettl3.L		pias3.L	c18orf21.L			dact1.L	pacs1.L	gpd2.L
znf710.L	atp8b3.L	agtpbp1.L		tmem79.L	muc3a			aldh1a3.L	mmadhc.S	fzd7.S
phactr1.S	prkca.S	g6pd.L		LOC108696316	ubiad1.L			afap1.S	c14orf93.L	slc30a9.S
march8.S	prelid1.S	tspan31.S		mid1.L	slc39a10			tnfsf11.L	dap.L	parn.S
fxyd6.L	dtl.L	eps8.S		cd82.L	krt5.7.S			dnajb14.L	gemin2.S	hist1h2aa.L
sept7.S	slc35d2.S	itch.S		cdh6.S	arfgef2-like.S			irx1.L	stat2.L	cask.S
atp1b1.L	dad1.S	lclat1.L		hao2.L	vezt.L			Xelaev18023152m	brdt.L	rab14.L
prickle2.L	dopey2.L	loc734029.L		foxa2.L	auts2			upp2.L	exoc5.S	setd7.L
stmn1.S	dgat1.L	myo5a.L		Xelaev18028753m	zbtb46.L			fli1b.L	strip2.L	cntln.L
LOC108712601	mfhas1	ttc13.S		acsbg2.S	rin3.L			bmpr1b.L	agfg1.L	slc22a15.2.S
bcr.S	sept8.S	gcfc2.S		znf710.L	mfsd6.L			chrna4.S	epg5.L	zic2.S
tmprss2.1.S	kiaa0141.S	acbd5.L		phactr1.S	lcmt2.L			stx11.S	stx7.L	lrp8.L
pfn4.S	scnn1a.S	nsun7.S		march8.S	chpt1.L			msgn1.S	lrch2.L	ywhag.S
btg2.S	sh3d21.L	c7orf60.S		fxyd6.L	selenow2.L			apcdd1.S	naga.L	epb41l4b.S
g67.L	dot1l.S	sycp2l.L		sept7.S	igf1r.L			LOC108698354	ap3s2.S	tspoap1.L
afap1l2.S	krt.S	LOC100158299		atp1b1.L	MGC98819			LOC108698417	nisch.S	zar1l.S
bmp4.S	fer.L	dcaf10.S		prickle2.L	tacc3.S			LOC108700085	acadl.L	Xelaev18008577m
Xelaev18039754m	kmt2c.S	ccdc9.S		stmn1.S	ube2n.L			foxd1.L	mtrr.L	ctf2
bcorl1.S	ehd4.L	dph5.S		LOC108712601	c2cd5.L			t.L	LOC100489887.L	ywhag.L
col13a1.L	ptprz1.L	ap3d1.L		bcr.S	sh3pxd2a.L			znf385b.L	MGC115231	mfsd12.L
atp10b	LOC108704423	lrp1.L		tmprss2.1.S	atp8b3.L			adgrg1.S	dnmbp.L	dock9.L
tmem163.S	qars.S	ciao3.S		pfn4.S	prkca.S			spns2.L	fam172a	tubd1.L
hand2.S	gnpnat1.L	kif15.L		btg2.S	prelid1.S			megf6.L	vps13d.L	xpo6.L
pknox2.S	kiaa1324l.L	pafah1b2.L		g67.L	dtl.L			slc4a2.S	gstcd.L	pign.S
Xelaev18019831m	etnk1.L	aprt		afap1l2.S	slc35d2.S			vegt.L	slc9a3r1.L	slc9a1.L
znrf1.L	slc33a1.L	bak1.L		bmp4.S	dad1.S			atg4c.L	chm.L	rilp.S
Xelaev18030509m	pigu	cox19.S		Xelaev18039754m	dopey2.L			plekhg5.S	lrba	Xelaev18001619m
mmp14.L	efna1.S	ccdc68.S		bcorl1.S	dgat1.L			hhip.L	fdxr.S	kifap3.S
LOC108698034	mcm6.2.S	rbbp5.S		col13a1.L	mfhas1			otx2.S	lrp3.L	parn.L
cmtm5.S	LOC108712218	ppp1cc.L		atp10b	sept8.S			map3k19.L	bloc1s5.L	csnk1g2.L
LOC108708333	mak16.S	apba3.L		tmem163.S	kiaa0141.S			LOC108719533	hectd2.L	npy2r-like.1.L
cebpa.L	thap2.S	cdc23.L		hand2.S	scnn1a.S			lgr5.S	sh3bp5.S	gbf1.L
klf2.S	pdcd2.S	kctd6.L		pknox2.S	sh3d21.L			spry4.S	trmu.L	hectd4.L
metrnl	tmem39a.L	wbp4.L		Xelaev18019831m	dot1l.S			Xelaev18000337m	sec23a.S	gramd1c.S
Xelaev18011560m	tsc1.S	smagp.S		znrf1.L	krt.S			tmprss4.L	supt3h.L	dis3l2.L
pcdh9.S	LOC108718134	pole2.L		Xelaev18030509m	fer.L			slc41a2.L	fbxw8.L	xpo6.S
Xelaev18041958m	tmem19.L	vamp8.L		mmp14.L	kmt2c.S			ppp2r3a.S	prrg1.S	tdh.S
LOC108711632	zmynd19.S	nomo3.L		LOC108698034	ehd4.L			pnhd.S	ddhd1.S	kiaa0586.L
tns1.L	arfgef2-like.L	syap1.L		cmtm5.S	ptprz1.L			vegt.S	LOC100158389	rev1.L
lasp1.L	unc50.L	znf605.L		LOC108708333	LOC108704423			clic1.S	nbl1.L	lrrc56.L
tlx3	rad9a.L	carnmt1.S		cebpa.L	qars.S			adamts18.L	tpte2.L	bmp7.2.S
hap1.S	pdcd2l.L	opa1.S		klf2.S	gnpnat1.L			loc446281.L	trim23.L	tdgf1.1.L
kcnk5	Xetrov90026452m.S	zp3.S		metrnl	kiaa1324l.L			fam20b.S	tnrc18	armc2.L
zmiz2.S	golph3l.S	hmbs.L		Xelaev18011560m	etnk1.L			tgds.S	vwa3a.L	bnipl.L
apbb2.L	kcmf1.L	dync1li1.S		pcdh9.S	slc33a1.L			nodal2.L	ccni.S	rcc1.S
sbspon	znf229.S	ldlrap1.S		Xelaev18041958m	pigu			arg1.L	asap1.S	LOC108701404
notch3	armc10.L	ipo13.L		LOC108711632	efna1.S			gli1.L	ptdss2.S	loc100493164.L
arhgef19.L	fam3c.S	arhgef10.L		tns1.L	mcm6.2.S			casd1.L	mdm1.L	tspan1.S
fads1.S	capns1.L	acat2.L		lasp1.L	LOC108712218			lhx1.S	slit3	loc733556.L
Xelaev18013734m	raver2.S	prkaca.L		tlx3	mak16.S			schip1.S	LOC108705724	gdf1.L
degs1.L	gpatch4.S	caap1.L		hap1.S	thap2.S			dmrta2.L	tnik.S	ccna1.L
LOC100037118	macf1	ankrd13a.S		kcnk5	pdcd2.S			skor1.S	slc25a15	antxr2.L
dlx5.S	serinc5.S	spc25.L		zmiz2.S	tmem39a.L			nodal1.S	tmem120b.S	itprip.S
hipk2.L	phactr3.S	rnpepl1.S		apbb2.L	tsc1.S			trim63.S	dlgap5.L	ccnb1.S
mesdc1.S	ttc4.L	parg.L		sbspon	LOC108718134			ptprj	chd3	slc34a2.L
frmd4b.S	vsig10.L	LOC496342		notch3	tmem19.L			rhcg.L	LOC108720027	bmp7.2.L
LOC108712667	slc27a2.L	cgnl1.L		arhgef19.L	zmynd19.S			bix2.L	tbc1d24.1.L	ifrd2.S
LOC108700650	med8.L	tmem161a.L		fads1.S	arfgef2-like.L			irx3.L	MGC115716	optn.S
ncs1.S	dennd3.L	pgk1.L		Xelaev18013734m	unc50.L			skor1.L	peci	dand5.S
tet3.S	zbtb40.L	lrrc27.L		degs1.L	rad9a.L			flt1.S	cers3.S	zfp36
map1lc3b.L	usp9x.S	pacsin2.L		LOC100037118	pdcd2l.L			klhl24.S	ccdc34.S	patl2.L
phactr4.S	plekhm1.S	aldh3b1.L		dlx5.S	Xetrov90026452m.S			zic2.L	osbpl3.L	immp1l.L
LOC108700080	dgka.L	edc4.L		hipk2.L	golph3l.S			irx3.S	idi1.L	prdm1.S
acsm3.L	ddhd1.L	cdca7l.L		mesdc1.S	kcmf1.L			slc25a46.L	rnf14.5.S	prdm1.L
xplcg1a	ccdc149.S	mtmr12.L		frmd4b.S	znf229.S			scn2b.L	phldb3.S
Xelaev18027269m	tm9sf2.L	ube2g1.S		LOC108712667	armc10.L			cyp26a1.S	kif16b
foxo1.L	LOC108714507	cyct.L		LOC108700650	fam3c.S			akap9.S	ttc39b.S
kdm6b.S	ing4.S	ppm1b.L		ncs1.S	capns1.L			dand5.L	nbas.L
fosl2.S	polr1c.L	col4a3bp.S		tet3.S	raver2.S			dmpk.L	mtmr14.S
gjb2.L	gigyf2.L	LOC108696874		map1lc3b.L	gpatch4.S			LOC108695571	rab27b.S
Xelaev18012294m	aadacl4.S	paip1.S		phactr4.S	macf1			adamts1.L	c9orf3.L
Xelaev18011395m	ube2w.S	csnk1g3.S		LOC108700080	serinc5.S			prdm14.L	agpat1.S
pdzrn3.L	stard3.L	alg10.S		acsm3.L	phactr3.S			filip1.L	ppp3cc
Xelaev18007821m	klhl36.L	polr2k.L		xplcg1a	ttc4.L			hoxc8.S	sema3a.L
pdgfa.L	slc25a39.L	tuba4.L		Xelaev18027269m	vsig10.L			LOC108705533	pak3.S
evi5.S	capns2.S	dennd4c.S		foxo1.L	slc27a2.L			LOC108697827	LOC108698206
dyrk3.S	plekhm1.L	timm21.L		kdm6b.S	med8.L			rasl11b.L	LOC108696301
p2ry4.L	ralgds.S	psme4.L		fosl2.S	dennd3.L			ednra.S	ghr.L
atf3.L	gmppa.L	lysmd2.L		gjb2.L	zbtb40.L			tnfrsf1a.S	tor1a.L
Xelaev18027791m	arhgap35.L	itsn1.S		Xelaev18012294m	usp9x.S			dmbx1.L	uck1.S
cdh1.S	kitlg.L	snx2.L		Xelaev18011395m	plekhm1.S			arx.L	hbox10.S
farp2.L	sh3rf2.S	slc12a6.S		pdzrn3.L	dgka.L			cdc42ep2	ccdc88a
poc1a.L	tubb.L	ap5m1.L		Xelaev18007821m	ddhd1.L			foxe1.S	cndp1.L
ece2.L	b3gnt7.L	zranb3.L		pdgfa.L	ccdc149.S			spry2.S	dnajb1.L
limd2.L	ptpn23.S	arfgef2-like.S		evi5.S	tm9sf2.L			Xelaev18027048m	LOC108719643
fbxo33.L	rab6a.L	slc38a10.S		dyrk3.S	LOC108714507			adamts19.L	med18.S
zfp36l2.S	dnajc11.S	naif1.S		p2ry4.L	ing4.S			hlx	rbsn.L
pcdh17.L	slc35a2.L	dda1		atf3.L	polr1c.L			slc26a4.L	osbpl11.S
socs3-like.1.S	clptm1.S	slc9a3r1.S		Xelaev18027791m	gigyf2.L			abcb1	nfatc3.L
nav2.L	ccdc142.S	frg1.L		cdh1.S	aadacl4.S			pax9.L	pttg1
src.S	mydgf.L	usp24.L		farp2.L	ube2w.S			mmrn2.L	hspbap1.L
uhrf2.L	mars2	btaf1.L		poc1a.L	stard3.L			frzb2.L	trim3.L
Xelaev18040057m	csgalnact2.L	ppm1e.S		ece2.L	klhl36.L			adamts1.S	rcan1.S
palm.S	meioc	c11orf73.L		limd2.L	slc25a39.L			LOC108709763	Xelaev18001443m
Xelaev18032309m	rnf38.S	slc38a9		fbxo33.L	capns2.S			nodal1.L	sh3d19.S
slc6a8.S	ganab.L	utrn.L		zfp36l2.S	plekhm1.L			tbc1d24.2.S	gpatch1.L
pax2.L	picalm.1.S	mettl15.S		pcdh17.L	ralgds.S			arhgef28.S	fam134c.L
apoc1-like.L	surf4.2.S	ppa1.L		socs3-like.1.S	gmppa.L			admp.S	mfsd10.L
pzp-like.2.L	notch2.S	cyb5r4.S		nav2.L	arhgap35.L			errfi1.L	LOC108696306
ralgds.L	ccdc71.S	uggt2.L		src.S	kitlg.L			plekhg5.L	arhgap10.S
afap1l2.L	gas1.S	abhd17a.L		uhrf2.L	golga4.L			pou4f1.L	mtif2.L
Xelaev18020076m	zbtb5.L	stxbp3.L		Xelaev18040057m	sh3rf2.S			pax3.S	tasp1.S
edn2.S	trub1.L	cog2.S		palm.S	tubb.L			otx2.L	bcs1l.L
cpe.L	ydjc.L	trmt5.L		Xelaev18032309m	b3gnt7.L			sgcb.S	agbl5.L
gse1.L	rps6ka3.S	atg16l1.L		slc6a8.S	ptpn23.S			erbb3.L	rph3a.S
LOC108702079	map3k2.L	ctsd.S		pax2.L	rab6a.L			onecut1	haus3
LOC100495096.1	entpd4.L	fadd.S		apoc1-like.L	dnajc11.S			dkk1.L	fam46c.S
Xelaev18028029m	gopc.S	usp25.S		pzp-like.2.L	slc35a2.L			onecut2.S	klhl5
fbxo21.S	stx12	ttl.L		ralgds.L	clptm1.S			pou4f1	asphd2.L
ckm.L	serbp1.L	fam46c.L		afap1l2.L	ccdc142.S			homeobox100496651-provi	wnk2.L
slc16a1.L	polr1a.L	hmces.L		Xelaev18020076m	mydgf.L			rgs16.S	rab29.S
gdpd1.S	aqp4	helz.S		edn2.S	mars2			srrm4	mad2l2.S
tubb6.S	znf236.L	pde4dip		cpe.L	csgalnact2.L			figf.L	gpm6b.S
rgmb.L	LOC108701166	cul3.L		gse1.L	meioc			gsc.S	tjp2.S
rap1gap.S	loc108718659.S	tada3.L		LOC108702079	rnf38.S			LOC108712674	LOC108695585
dpp10.S	eif2ak3.S	LOC105947450.S		LOC100495096.1	ganab.L			ppp1r16b.S	smim18.S
nfil3	slc44a4.L	cnfn.3.L		Xelaev18028029m	picalm.1.S			cnksr2	btbd19.S
Xelaev18047127m	slc39a10.L	rnf123.L		fbxo21.S	surf4.2.S			lefty.S	tlk1.S
Xelaev18037856m	dhx33.L	mfn1.S		ckm.L	notch2.S			dmbx1.S	efna5.S
trpv6.L	dnajc3.L	cactin.S		slc16a1.L	ccdc71.S			gsc.L	ankrd35.L
LOC108710290	nle1.S	ube2h.S		gdpd1.S	gas1.S			spry4.L	tmem39b.L
ccng1.S	nup210.L	dcp1b.L		tubb6.S	zbtb5.L			dkk1.S	mink1.L
dnmbp.S	atp6v0a2.L	wdhd1.L		rgmb.L	trub1.L			ap4e1.S	apba2.S
znf462.S	aspg.L	ptp4a1.L		rap1gap.S	ydjc.L			gdf3.S	atp12a
ankrd10.L	uri1.S	acoxl		dpp10.S	rps6ka3.S			olig4.L	trim7.L
fcn1	itpa	hmgxb4.S		nfil3	map3k2.L			fezf1.L	pgap1.L
slc7a8.L	cdk6.L	gdf9.L		Xelaev18047127m	entpd4.L			rorb.L	ctbp1.S
LOC108712868	ptcd3.L	mmp15.S		Xelaev18037856m	gopc.S				rps6kc1.L
faxc.L	aamp.S	caprin2.L		trpv6.L	stx12				gde1.L
cyp27a1.L	LOC108719544	plpp1.L		LOC108710290	serbp1.L				nhej1.S
Xelaev18041870m	shkbp1.L	gpi.L		ccng1.S	polr1a.L				tmem189.L
nwd1.L	yif1b.L	trmt11.L		dnmbp.S	aqp4				snx10.L
xkr8.S	palb2.L	tarbp1.L		znf462.S	znf236.L				specc1.L
fzd4	dus4l.L	znf830.S		ankrd10.L	LOC108701166				LOC108704332
xepsin.L	nudt1.S	fam175a.S		fcn1	loc108718659.S				batf3.S
Xelaev18044839m	szl.L	triqk.L		slc7a8.L	eif2ak3.S				osbpl9.S
acer3.S	lama5.L	LOC108700013		LOC108712868	slc44a4.L				scd.L
pik3r1.L	hes1.L	Xelaev18011182m		faxc.L	slc39a10.L				pid1.S
dpf1.S	znf654.L	paip1.L		cyp27a1.L	dhx33.L				pik3c2a.L
sema6d.L	cep170b.S	dnajc14.L		Xelaev18041870m	dnajc3.L				osbpl8.S
LOC108697063	rictor	pdcd10.S		nwd1.L	nle1.S				mib2.L
LOC108700791	dtl.S	sh3glb1.S		xkr8.S	nup210.L				prdm9.L
rnf135.L	ccdc14	mipep.L		fzd4	atp6v0a2.L				plekhg1.L
mob2.2.S	rnf146.S	srpk3.S		xepsin.L	aspg.L				Xelaev18001309m
ckmt1b.S	setd4.L	extl2.L		Xelaev18044839m	uri1.S				insrr.S
LOC108697222	mrto4.S	birc5.2.S		acer3.S	itpa				MGC84007
brsk2	fancm.L	os9.L		pik3r1.L	cdk6.L				trim7.S
magi1.S	fchsd2	mycbp2.L		dpf1.S	ptcd3.L				otud4-like.2.L
mast2.S	fam3a.L	gyg		sema6d.L	aamp.S				nedd1.L
hbegf.L	cltc.L	sfxn4.L		LOC108697063	LOC108719544				LOC108706865
gpatch8.L	aamp.L	pip4k2c.S		LOC108700791	shkbp1.L				acot12.L
LOC108705525	snapc5.L	mettl9.L		rnf135.L	yif1b.L				timeless.S
Xelaev18022168m	b4galnt3.L	npc1.L		mob2.2.S	palb2.L				tecpr1.L
b3gnt7.S	LOC108709654	mtmr1.L		ckmt1b.S	dus4l.L				fgfr3
mtus1.L	wsb1.L	LOC100127794.L		LOC108697222	nudt1.S				wdr47.S
mnt.S	stag2.S	wdfy3		brsk2	szl.L				tex2.2.S
kng1.L	polr3h.L	sec24b.L		magi1.S	lama5.L				rassf2.L
dlc1.L	atxn2.S	sorl1.L		mast2.S	hes1.L				fancb.L
scmh1.L	mfsd11.S	ctdp1.S		hbegf.L	znf654.L				LOC108718301
crabp2.L	srrd.L	capn7.L		gpatch8.L	mgat4a.S				kmt5a.L
pdp2.L	cd3eap	umad1.L		LOC108705525	cep170b.S				parp11.S
asxl3.S	sbno2.S	psip1		Xelaev18022168m	rictor				acer2.L
flvcr2.L	tmem259.L	pkd1l1.L		b3gnt7.S	dtl.S				trappc10.L
fhl3.S	arid3a.S	top1.2.S		mtus1.L	ccdc14				agpat4.L
mprip.L	evpl.L	efr3a.L		dnmbp.L	rnf146.S				tdrd1.L
LOC108708769	trip11.L	mapk14.S		mnt.S	setd4.L				ppm1e.L
hpgd.S	trim29.S	qrich1.2.S		kng1.L	mrto4.S				pde7a.L
LOC108700617	tfcp2l1.L	fastkd2.L		dlc1.L	fancm.L				sfrp2.S
mrc2.S	wasl.S	trim44.S		scmh1.L	fchsd2				ank3.S
sephs1.L	edem3.S	ubac2.L		crabp2.L	fam3a.L				prelid2.L
ranbp3l.L	agpat3.L	smap1		pdp2.L	cltc.L				abr.L
LOC108710484	eif4a2.L	tbc1d5.L		asxl3.S	pik3ca.S				ttbk2.L
mid1.S	mst1r.L	cacnb4.S		flvcr2.L	aamp.L				per3.S
pdgfb.L	fam8a1.S	smagp.L		fhl3.S	snapc5.L				grtp1.S
fras1.L	yipf6.L	bloc1s6		mprip.L	b4galnt3.L				slc26a6.L
tmem198.L	mrpl55.L	h6pd.S		LOC108708769	LOC108709654				kcnip4.L
mllt3.L	LOC108706721	pla2g6.L		hpgd.S	wsb1.L				Xelaev18001896m
ccng1.L	cfap100.L	ccdc124.S		LOC108700617	stag2.S				kiaa1328.L
Xelaev18028404m	hid1.S	tmem62.S		mrc2.S	polr3h.L				tmem55a.S
tead1.S	MGC52622	gnai1.S		sephs1.L	atxn2.S				phf19.S
ldlrap1.L	slc22a4.L	trim23.S		ranbp3l.L	mfsd11.S				elmo2.L
phf13.L	hspa13.L	cmtm7.L		LOC108710484	srrd.L				pla2g4a.L
cbx1.L	msto1.L	phc3.L		mid1.S	larp4.L				lpp
rarg.L	trdmt1.L	stk3		pdgfb.L	cd3eap				vps50.L
LOC108711622	LOC108717955	ociad1.L		fras1.L	sbno2.S				grip1.S
lama1.L	zbtb7b.S	pdzd2.S		tmem198.L	tmem259.L				josd1.L
sdc3	hipk1.L	alkbh8.S		mllt3.L	arid3a.S				lhx5.L
LOC108698246	wdr13.L	dctn2.S		ccng1.L	evpl.L				nav3.L
fry.L	prkcd.S	gna11.S		Xelaev18028404m	trip11.L				neurl1b.L
otud1.L	cbfb.S	add3.S		tead1.S	trim29.S				tmem57.S
smc1b.L	arhgef1.S	eomes.S		ldlrap1.L	tfcp2l1.L				rb1cc1.S
myoc.L	cab39.S	myo1c.L		phf13.L	wasl.S				gtdc1.S
ptger4.S	wdsub1.S	naa16-like.L		cbx1.L	edem3.S				calhm2.L
atf6b.L	fundc1.L	sowaha.S		rarg.L	agpat3.L				sorbs3.L
Xelaev18043506m	smim10	patl1.L		LOC108711622	eif4a2.L				cr1b
loc495835.L	zbtb40.S	gtf2i.S		lama1.L	mst1r.L				ptar1.L
Xelaev18010400m	rsbn1l.S	gpm6b.L		sdc3	fam8a1.S				gpt2
mtcp1.L	mtfr1.L	gs17.L		LOC108698246	yipf6.L				c15orf39.S
ddr2.S	pcyt1a.S	fez2.L		fry.L	mrpl55.L				nploc4.L
LOC100495010.S	ccnt1.S	sept11.L		otud1.L	LOC108706721				liph.S
adcy5	efs.L	abca5.S		smc1b.L	cfap100.L				evi5l.L
hes3.1.S	akap1	pvrl1-like.2.S		myoc.L	hid1.S				cxorf57.S
fbln1.L	xpo4.L	dmtf1.S		ptger4.S	MGC52622				pclo.L
zfp36l1.L	vamp7.L	tulp4.L		atf6b.L	slc22a4.L				lamp1.L
depdc7.L	gopc.L	naglu.L		Xelaev18043506m	hspa13.L				ankrd27.L
LOC108718652	tm9sf3.L	LOC108700142		loc495835.L	msto1.L				gcnt3.S
smad6.L	picalm.S	usp24		Xelaev18010400m	trdmt1.L				lpar6.S
b3gnt2.L	MGC68448	pawr.L		mtcp1.L	LOC108717955				lonrf1.S
cramp1.S	nus1.L	smn2.S		ddr2.S	zbtb7b.S				aida.S
pdk4.L	ficd.L	LOC108719555		LOC100495010.S	hipk1.L				appbp2.S
p2ry11.S	lrif1	tpx2.L		adcy5	wdr13.L				tdgf1.3.L
bcam.S	ube2n.S	grip1		hes3.1.S	prkcd.S				Xelaev18041216m
klhl21.L	c7orf26.L	cenpo.L		fbln1.L	cbfb.S				fam210a.S
LOC108717416	golga3.L	prkar2b.S		zfp36l1.L	arhgef1.S				shroom3.L
fam222b.L	igbp1.L	pomgnt1.S		depdc7.L	cab39.S				vash1.L
Xelaev18026829m	ints10.L	zc3h11a.S		nab1.L	wdsub1.S				rcan1.L
amotl2.L	rere.S	atp6v0a1.S		LOC108718652	fundc1.L				mogat2.2.L
arhgef11.L	rnf139.L	atp2b1.S		smad6.L	smim10				scn1b.S
znf516.S	esrp1.L	pold2.L		b3gnt2.L	zbtb40.S				tex2.2.L
txnrd1.L	ocrl.S	ptdss2.L		cramp1.S	rsbn1l.S				fam73a.L
LOC108698172	ncbp1.S	lzic.L		pdk4.L	mtfr1.L				hhla2.S
fgfrl1.S	atrx.L	adcy4.L		p2ry11.S	pcyt1a.S				LOC108715416
slc4a10.S	c6orf62.L	brox.S		bcam.S	ccnt1.S				arhgap26.L
LOC108703373	tm9sf3.S	pigh.L		klhl21.L	efs.L				reep6.L
plch1	tsen2.L	velo1.L		LOC108717416	akap1				foxd4l1.1.S
pcnxl4.L	ddx54	rwdd1.L		fam222b.L	xpo4.L				l2hgdh.L
hn1.L	prickle3.L	amfr.L		Xelaev18026829m	vamp7.L				lrrc28.L
c1orf174.S	golga5.S	megf11		amotl2.L	gopc.L				paqr8.L
dll1.S	rhbdf2.L	fbxo34.S		arhgef11.L	tm9sf3.L				gs17.S
fbln1	smchd1.L	plrg1.L		znf516.S	picalm.S				trmo.L
zmynd8.S	topbp1.L	mmadhc.L		txnrd1.L	MGC68448				spg11.L
rab40b.L	wdr46.L	pik3r2.L		LOC108698172	nus1.L				casp10.S
ano6.L	mrto4.L	cnep1r1.L		fgfrl1.S	sec24b.L				ehbp1
rgma.L	retsat.L	mrpl1.L		slc4a10.S	ficd.L				nell1.S
gata2.L	utp15.L	mocs3.L		LOC108703373	lrif1				fndc7.L
slco5a1.S	fam234a.L	papd5.L		plch1	ube2n.S				arhgap26.S
ttc5.S	rpl4.S	gdf9.S		pcnxl4.L	c7orf26.L				atxn1.S
a4galt	mia3	dnah3		hn1.L	golga3.L				rabggta.S
arl6ip1.L	nfe2l1.S	ecsit.S		c1orf174.S	igbp1.L				aifm3.L
Xelaev18012293m	cep152.S	gng10.L		dll1.S	ints10.L				ralgps2.L
ndfip2.S	igf2r.L	siae.S		fbln1	rere.S				rnf41.L
mgc145260.L	ctps1.S	pdcd10.L		zmynd8.S	rnf139.L				LOC108711583
col11a1.L	ubr5.S	cyp4v2.S		rab40b.L	esrp1.L				gdpd5.S
gse1.S	MGC83673	pitpnb.2.S		ano6.L	ocrl.S				bmp2k.S
Xetrov90026715m.L	heatr1.S	armc8.S		rgma.L	ncbp1.S				LOC108703769
twsg1.L	LOC108696788	dennd2d.S		gata2.L	atrx.L				eps8l3.L
c17orf75.L	txndc12.L	irak1.L		slco5a1.S	c6orf62.L				slc5a1.2.L
ndrg4.S	zfp91.S	zar2.L		ttc5.S	tm9sf3.S				ceacam21
LOC108719420	syde2.S	slc7a9.L		a4galt	tsen2.L				smpdl3a.L
rhobtb1.S	tmed9.L	pfkfb3.L		arl6ip1.L	ddx54				hras.L
rbm38.L	znf654.S	slc9a7.S		Xelaev18012293m	sulf1.L				LOC108703778
prr12.S	srpra.L	xtm4		ndfip2.S	prickle3.L				elavl3.L
fdft1.L	cyp4b1.2.L	muc5acl.S		mgc145260.L	golga5.S				rgcc.S
fam83f.L	tmem45b.L	mbp.S		col11a1.L	rhbdf2.L				ska2.L
ulk2.L	tnks2.S	fut10.L		gse1.S	smchd1.L				LOC108714398
gfpt1.L	rangap1.S	c1qbp.S		Xetrov90026715m.L	topbp1.L				sbk1.L
Xelaev18021145m	urb2.L	lamp1.S		twsg1.L	wdr46.L				ccdc88a.S
arid4b.L	ptp4a2.L	thada		c17orf75.L	mrto4.L				hps1.S
fam107a.S	gen1	cc2d1b.S		ndrg4.S	retsat.L				c15orf41.L
MGC81163	gemin5	pigs.L		LOC108719420	utp15.L				map2k7.S
plpp3.S	mfsd14a.S	arl15.L		rhobtb1.S	fam234a.L				abhd12.L
prpsap1.L	pcnt.L	ehbp1.L		rbm38.L	rpl4.S				rps6kc1.S
tfe3.S	sprtn.S	smc6.L		prr12.S	mia3				pou5f3.3.S
ccdc171	thap7.L	cuedc1.L		fdft1.L	nfe2l1.S				gpc1.S
gata5.S	znf518a.L	LOC108711140		fam83f.L	cep152.S				mpst
fzd2	strap.L	uqcc2.S		ulk2.L	igf2r.L				sox18.L
fgfr2.L	nup188.S	pef1.L		gfpt1.L	ctps1.S				eri3.S
LOC108716019	ptrh2.L	ctu1.L		Xelaev18021145m	ubr5.S				st3gal1.S
slc20a1.S	cdca7.S	taok3.L		arid4b.L	MGC83673				lgmn.S
LOC108716737	fam174b.L	ppp2r2b.S		fam107a.S	heatr1.S				fbxo46.S
ahdc1.S	gigyf1.L	tor1b.L		MGC81163	LOC108696788				arhgap20
rassf3.L	wdr36.S	jak2.L		plpp3.S	txndc12.L				gas2l1.S
tsc22d1	MGC108429.L	heatr5b.L		prpsap1.L	zfp91.S				rab27b.L
iqsec2.L	nufip1.S	stk26		tfe3.S	syde2.S				gls.L
uck2.S	pi4k2b.S	letm1.S		ccdc171	tmed9.L				LOC108706212
LOC101027296	timm17a.S	mgat4a.S		gata5.S	znf654.S				cited2.L
LOC108701215	nr2c1.L	LOC108714350		fzd2	srpra.L				MGC80465
chst12.L	leng8.S	fam26d.L		fgfr2.L	cyp4b1.2.L				nab1.L
Xelaev18028564m	strap	ano1.L		LOC108716019	tmem45b.L				nid1.S
cspg4.L	stambp.S	wdr44.S		slc20a1.S	tnks2.S				dtna.S
cdca2-like.S	emg1.S	trmt44.L		LOC108716737	rangap1.S				herc1.L
c16orf52.S	dolpp1.L	hip1r.L		ahdc1.S	urb2.L				LOC108718445
spin1.L	c17orf97	eml2.L		rassf3.L	ptp4a2.L				c10orf35.L
gpr143.L	slc12a2.S	b4galt1		tsc22d1	gen1				LOC108712660
cdknx.L	golga1.L	aldh7a1.S		iqsec2.L	gemin5				ptprm
rras2	tmem63a.L	brms1l.L		uck2.S	mfsd14a.S				dapk1.L
fsbp-like.L	rpl8.L	ccdc62.L		LOC101027296	pcnt.L				zcchc11.S
znf592.L	lig3.L	vta1.L		LOC108701215	sprtn.S				commd2.S
als2-like.L	ap1b1.L	lpar6.L		chst12.L	thap7.L				foxi2.L
ier5l.L	ap1m2.L	rabgap1l.S		Xelaev18028564m	znf518a.L				tapt1.S
ifnar1	faf2.S	gdpd5.L		cspg4.L	strap.L				camsap1.L
cxadr.L	tmem183a.L	clstn2.S		cdca2-like.S	nup188.S				ttc13.L
castor2	c9orf114.L	slmap.L		fpgs.S	ptrh2.L				ada.S
cic.L	spsb1.S	rnaseh1.S		c16orf52.S	cdca7.S				lrp2.L
tubb2b.L	sptbn2.L	mrps17.L		spin1.L	fam174b.L				slc38a9.S
slc38a2.L	gemin4.L	fzd7.L		gpr143.L	gigyf1.L				amh.S
intu.S	mak16.L	rwdd4.S		cdknx.L	wdr36.S				gpr137c.S
LOC108701848	ube3d.S	hmmr.L		rras2	MGC108429.L				kcnh6
emp2.S	papd4.L	rnf126.L		fsbp-like.L	nufip1.S				calhm2
myo9b.S	mgat1.L	fitm2.L		znf592.L	pi4k2b.S				igdcc4.L
wdfy2.S	fkbpl.S	styx.S		als2-like.L	timm17a.S				usp18.L
lrrc8e.L	grwd1.L	galnt2.S		ier5l.L	nr2c1.L				stk11.L
arhgap33.S	arid1a	LOC108709286		ifnar1	leng8.S				mthfr.S
cdh13.S	ranbp2.L	dctn2.L		cxadr.L	strap				sema3c.S
vgll4.L	chmp4b.S	arhgap29.L		castor2	stambp.S				pla2g4f.L
nt5c1a	nus1.S	ggps1.S		cic.L	emg1.S				fam198b.L
gprc5b.L	znf526.S	cask.L		tubb2b.L	dolpp1.L				tpcn2
rybp.S	krt18.L	spef1.L		slc38a2.L	c17orf97				znf234.L
clcn6.L	exosc6.L	cflar.L		intu.S	slc12a2.S				borcs7.S
ctnna2	phf6.S	dis3l.L		LOC108701848	golga1.L				brpf3.S
zbtb33.L	noc2l.L	ints2.S		emp2.S	tmem63a.L				tprn
ventx1.2.L	emc1.S	cenpa.L		myo9b.S	rpl8.L				ccdc3.L
cebpg.S	pdcl3.L	galnt6		wdfy2.S	lig3.L				cox5b.2.L
sat1.L	selk.S	tyw3.L		lrrc8e.L	ap1b1.L				wee2.S
cyp2u1.L	MGC146454.L	anks1a		arhgap33.S	ap1m2.L				map1lc3c.L
LOC100489157-like.S	acbd3.L	mgat4a.L		cdh13.S	faf2.S				sik2.S
cecr1.S	trim67.S	atl2.L		vgll4.L	tmem183a.L				rab31.L
best2.S	rps6ka3.L	gpr137c.L		nt5c1a	c9orf114.L				kiaa0226l.S
cpeb2-like.S	smyd5.L	klc1.L		gprc5b.L	spsb1.S				npnt.S
hacd2.S	nol8.L	ube2g1.L		rybp.S	sptbn2.L				neu1.L
rapgef1.S	c6orf62.S	mcoln2.L		clcn6.L	gemin4.L				kiaa0825.L
rgs3.S	pa2g4.L	prickle4.S		ctnna2	mak16.L				lhx5.S
slc25a29.L	edc3.L	xarp-like.S		zbtb33.L	ube3d.S				capn3.L
pdlim4.L	ddx56.L	fopnl.L		ventx1.2.L	papd4.L				atp13a4.S
Xelaev18012289m	chsy1.L	tmem2.S		cebpg.S	mgat1.L				trappc8.S
gabarapl2.S	arl8b.L	rnf34.L		sat1.L	fkbpl.S				manbal.S
umod	gm20188	nf2.L		cyp2u1.L	grwd1.L				LOC108718446
bcr.L	Xelaev18012451m	hook2.L		LOC100489157-like.S	arid1a				ly75.L
ypel5.L	slc39a7.S	mov10l1.L		cecr1.S	ranbp2.L				dmxl2.S
Xelaev18043719m	wdr43.S	smarca5.S		best2.S	chmp4b.S				slc8a3.L
phox2a.S	naa10.S	b3glct		cpeb2-like.S	nus1.S				atp8a1.S
LOC108718887	tti1.L	myof.1.L		hacd2.S	znf526.S				cdca7
znf282.S	c14orf169.L	ppp2r2b.L		rapgef1.S	krt18.L				pgat.L
ctdsp2.S	psmg1.L	cep41.S		rgs3.S	exosc6.L				Xelaev18003796m
rasa2.L	dnajb12.L	gpd2.S		npnt.S	phf6.S				gpr65.S
mtcl1.L	chmp1b.L	nptn.L		slc25a29.L	noc2l.L				ankrd54.S
shroom2.L	ppip5k2.L	birc5.2.L		pdlim4.L	emc1.S				MGC84586
acsf2.L	tcf20.S	g6pc.L		Xelaev18012289m	pdcl3.L				oma1.S
klf11.S	tceb3.L	dennd4b.L		gabarapl2.S	selk.S				dlk2.S
LOC108698716	cdca7.L	ivns1abp.L		umod	MGC146454.L				homer3.S
fam129b.S	dph2.L	cep131.L		bcr.L	acbd3.L				syt4.S
ifrd1.L	ptafr.L	tmem57.L		ypel5.L	trim67.S				c18orf8.S
fam228b.S	rrs1.S	sclt1.L		Xelaev18043719m	rps6ka3.L				Xelaev18024710m
wasf1.L	mpdu1.L	baiap2.S		phox2a.S	smyd5.L				rnf170.S
gpx1.L	acsl1.S	atg4c.S		LOC108718887	nol8.L				racgap1.2.L
lrrc8c.S	gosr2.L	sucla2.L		znf282.S	c6orf62.S				corin.L
vash2.S	xetrov90011961m.L	lmo7.S		ctdsp2.S	pa2g4.L				mapkapk5.S
Xelaev18030442m	kmt2e.S	pus7.L		rasa2.L	edc3.L				sds.L
flt4	fam179b.L	tut7.S		mtcl1.L	ddx56.L				arid4b.S
Xelaev18041239m	utp15.S	nfkbie.L		shroom2.L	chsy1.L				trerf1.L
pcsk6.L	eif6.S	larp4.L		acsf2.L	arl8b.L				pag1.S
sema6a.L	mcm10.L	fbxo25.L		klf11.S	gm20188				lpar5.S
rbms1.S	LOC108710017	pik3ca.S		LOC108698716	Xelaev18012451m				trafd1.S
prickle1.S	m6pr.L	mpp6.L		fgfr3	slc39a7.S				ripor3.S
slc25a44.L	LOC108718070	tubgcp3.S		mst1.L	wdr43.S				zyg11b.S
rhebl1.L	senp1.L	dhcr24.S		fam129b.S	naa10.S				tpcn1
cdk5r1.S	rnft1.L	pnrc2.L		ifrd1.L	tti1.L				ccdc53.L
LOC108717200	sars.L	tango6		fam228b.S	c14orf169.L				camkk1
lrrn3.S	prkci.L	adarb1.L		wasf1.L	psmg1.L				LOC108699896
LOC108707159	gcc1.S	ubac1.L		gpx1.L	dnajb12.L				spsb3.L
rab11fip4l.L	kiaa1147.L	pam.S		lrrc8c.S	chmp1b.L				pknox2.L
brip1.L	ppp3cc.S	sulf1.L		vash2.S	ppip5k2.L				ethe1.S
LOC108699904	rpl17-c18orf32	dus1l.L		Xelaev18030442m	tcf20.S				acad11.L
Xelaev18012801m	ripk4.L	cdo1.S		flt4	tceb3.L				kank3.S
MGC84460	eif3k.L	eomes.L		Xelaev18041239m	cdca7.L				kiaa0513.L
arhgef11.S	phrf1.S	capn5.S		pcsk6.L	dph2.L				tmem266.L
tsku.S	rps6kb1.S	plin3.L		sema6a.L	ptafr.L				sox18.S
patz1.S	trmt10c.S	pdpr.L		rbms1.S	rrs1.S				LOC108698338
cdk1.L	ddx51.L	iqgap1		prickle1.S	mpdu1.L				MGC115510
MGC80058	rps3.S	LOC100489554.L		slc25a44.L	acsl1.S				chst10.L
LOC108717350	MGC53707	tbc1d1.S		rhebl1.L	gosr2.L				serac1.L
fnip2.L	slc20a1.L	not.S		cdk5r1.S	xetrov90011961m.L				cntn4.L
cdh2.S	LOC108719008	clint1.L		LOC108717200	kmt2e.S				kat2b
klf17.L	trap1.S	mfsd4b.S		lrrn3.S	fam179b.L				gpr137b.L
pced1a.S	esf1.L	dcaf6.L		LOC108707159	utp15.S				dsc3.S
LOC108712891	ak2.L	cdc27.S		rab11fip4l.L	eif6.S				zfyve28.L
ube2e2.L	trap1.L	sh3d19.L		brip1.L	mcm10.L				gprc5b.S
afap1l1.L	kmt2d.L	tor1b.S		LOC108699904	LOC108710017				LOC108711716
znf238.2.L	polr3a.L	dapl1.L		Xelaev18012801m	m6pr.L				pank3
lsp1.S	frrs1.L	pnpt1.S		MGC84460	LOC108718070				MGC68821
arl4c.L	sf3b3.S	LOC108719547		arhgef11.S	senp1.L				admp2.L
ripply2.S	slc6a7	ssbp2.L		tsku.S	rnft1.L				elavl3
tbx20.L	clptm1.L	orc6.L		patz1.S	sars.L				ston2.S
tifa.L	rps7	lrrk2.L		cdk1.L	prkci.L				csk.L
fbxo31.L	prc1.2.L	plxna1.S		gs17.S	gcc1.S				plekhm3.L
mzt1.L	trim29.L	trappc8.L		MGC80058	kiaa1147.L				kcnj5.L
xkr7.L	crls1.S	ccz1b.L		LOC108717350	ppp3cc.S				nlk.L
acer2.S	dhx38.L	mgat4b.L		fnip2.L	rpl17-c18orf32				alg13.L
sowahc.L	tspan6.S	tbc1d1		cdh2.S	ripk4.L				grin1.S
tnip3.L	ldb1.S	LOC108709626		klf17.L	eif3k.L				wnk2
gpsm2.L	utp18.L	tnfaip8l3.S		rcan1.L	phrf1.S				gpr65.L
rspry1.S	rpl8.S	tll2.L		pced1a.S	rps6kb1.S				wasll.S
lbh.S	rrp1b.S	mpp6.S		LOC108712891	trmt10c.S				LOC108703768
tiparp.S	ccndbp1.S	map3k4.S		ube2e2.L	ddx51.L				LOC100036828
LOC108704623	ddi2.S	agbl5.S		afap1l1.L	rps3.S				stat6.L
Xelaev18001689m	pex6.S	tnfrsf19.L		znf238.2.L	MGC53707				zyg11b.L
has1.S	tbc1d25.L	tbc1d22b.S		lsp1.S	slc20a1.L				cyp1a1.L
[truncated: 1,374 more rows]
